# Supplementary material for: Derivation of trophoblast stem cells from naïve human pluripotent stem cells
Source: eLife journal article supplement (doi:10.7554/elife.52504), 2020-02-12
Supplement: supp [file elife-52504-supp-v1.zip]

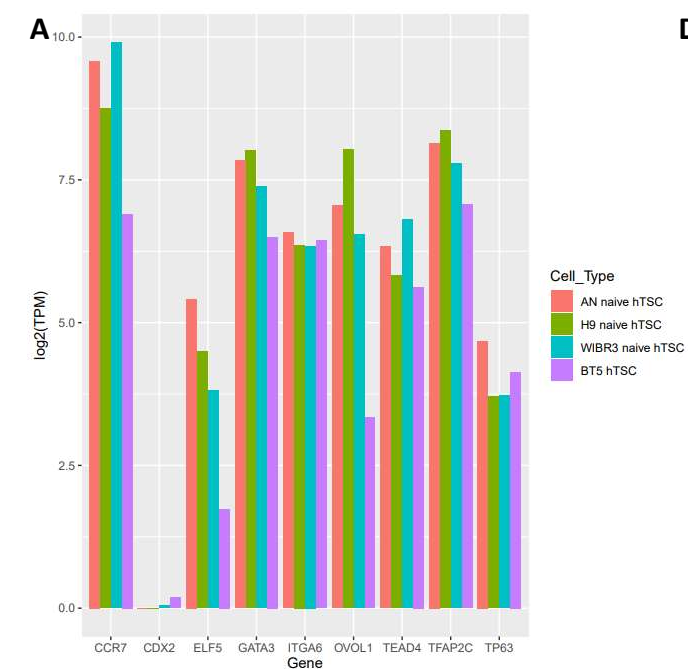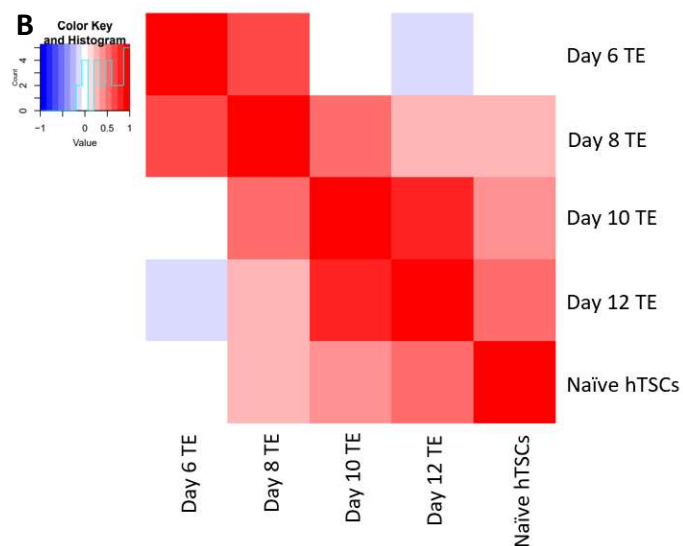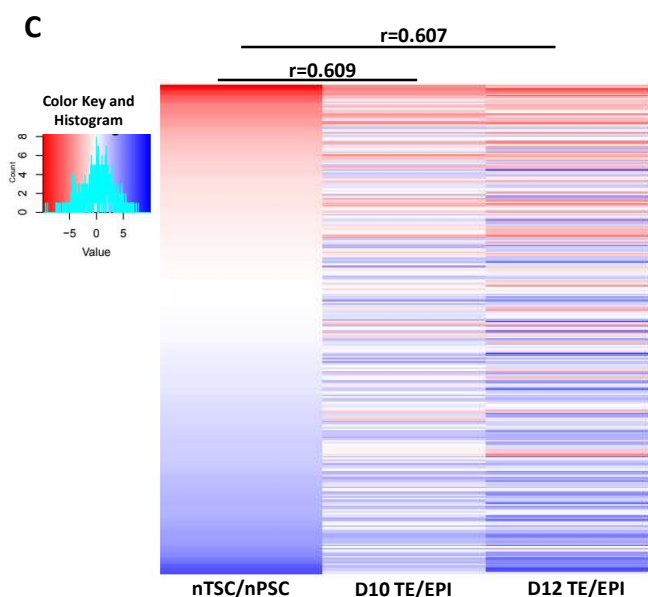

**D GO Term: Biological Processes**

| Name                                                             | P-value  |
|------------------------------------------------------------------|----------|
| Female pregnancy                                                 | 4.59E-10 |
| Multi-multicellular organism process                             | 1.94E-09 |
| Reproductive process                                             | 8.33E-08 |
| Reproduction                                                     | 8.51E-08 |
| Multi-organism reproductive process                              | 1.81E-07 |
| Cell-cell signaling                                              | 2.39E-05 |
| Positive regulation of NF-kappa B transcription factor activity  | 4.96E-05 |
| Positive regulation of cell population proliferation             | 8.75E-05 |
| Regulation of hydrolase activity                                 | 9.19E-05 |
| Defense response                                                 | 1.16E-04 |
| Positive regulation of DNA-binding transcription factor activity | 1.58E-04 |
| Regulation of T cell mediated immunity                           | 1.98E-04 |
| Amyloid fibril formation                                         | 2.21E-04 |
| Positive regulation of T cell cytokine production                | 3.49E-04 |
| Cellular response to hormone stimulus                            | 4.64E-04 |

**Figure 4-S1**
