# Supplementary material for: Derivation of trophoblast stem cells from naïve human pluripotent stem cells
Source: eLife journal article supplement (doi:10.7554/elife.52504), 2020-02-12
Supplement: supp [file elife-52504-supp-v1.zip]

Archive with 14 entries (14 files):
- elife_poa_e52504_Transparent_Reporting_File.pdf
- elife_poa_e52504_Supplementary_file_5.xlsx
- elife_poa_e52504_Supplementary_file_1.csv
- elife_poa_e52504_Figure_1_figure_supplement_1.pdf
- elife_poa_e52504_Figure_1_figure_supplement_2.pdf
- elife_poa_e52504_Supplementary_file_4.xlsx
- elife_poa_e52504_Figure_3_figure_supplement_1.pdf
- elife_poa_e52504_Supplementary_file_3.xlsx
- elife_poa_e52504_Supplementary_file_2.csv
- elife_poa_e52504_Figure_2_figure_supplement_2.pdf
- elife_poa_e52504_Figure_4_figure_supplement_2.pdf
- elife_poa_e52504_Figure_2_figure_supplement_1.pdf
- elife_poa_e52504_Figure_4_figure_supplement_1.pdf
- elife_poa_e52504_Supplementary_file_6.xlsx
