# Supplementary material for: Derivation of trophoblast stem cells from naïve human pluripotent stem cells
Source: eLife journal article supplement (doi:10.7554/elife.52504), 2020-02-12
Supplement: supp [file elife-52504-supp-v1.zip › elife_poa_e52504_Supplementary_file_1.csv]

	baseMean	log2FoldChange	lfcSE	stat	pvalue	padj	X38wt_naive_tsc	an_naive_tsc	h9_naive_tsc	an_primed_tsc	h9_primed_tsc
XAGE2	5320.956681	16.4982234	2.452579473	6.726886358	1.73E-11	2.43E-10	419.4592092	743.8384982	800.7543798	0	0
XAGE3	1386.438229	15.24170435	1.536134243	9.922117429	3.34E-23	2.56E-21	347.5368756	212.5954796	264.1304283	0	0
AC011453.1	4285.452298	15.11181216	1.49913154	10.08037771	6.75E-24	5.66E-22	912.6174245	574.3599369	533.1831353	0	0.038674338
FYB1	2222.060469	14.80997879	2.272577284	6.516820744	7.18E-11	8.98E-10	156.5116839	261.1173678	194.1671667	0	0
SIGLEC6	659.7949223	14.61738337	2.047630423	7.138682455	9.42E-13	1.65E-11	162.7300375	157.3173792	213.1394446	0	0
KRT23	873.531544	14.60645408	2.172324773	6.723881374	1.77E-11	2.48E-10	111.4697467	175.9890931	240.6659738	0	0
LGALS16	1119.7468	14.57720192	2.375144985	6.137394562	8.39E-10	8.74E-09	141.607376	147.5311081	228.527539	0	0
DSG3	742.0827386	14.47652096	2.368689775	6.111615421	9.86E-10	1.02E-08	132.8885203	347.5149914	11.66054361	0	0
CCR7	1774.739792	14.39140626	2.119809486	6.789009273	1.13E-11	1.63E-10	604.4634553	451.6425539	262.0754965	0.048298091	0
FOLR1	4520.494836	14.34563472	1.366152521	10.50075632	8.57E-26	9.73E-24	634.9959007	1332.447901	441.2368816	0.048298091	0.038674338
SFN	698.3532592	14.27303851	1.566014651	9.114243279	7.92E-20	3.88E-18	209.6473512	126.1569092	87.35849883	0	0
NUPR1	1545.599879	14.17878486	1.682067448	8.429379498	3.48E-17	1.18E-15	76.46271881	162.5995088	154.7411484	0	0
VGLL1	4362.400751	14.00499332	1.9321988	7.248215518	4.22E-13	7.91E-12	458.7434115	732.00489	954.6831133	0.096596182	0
TMPRSS13	807.8041163	13.86418894	1.732263989	8.003508138	1.21E-15	3.31E-14	116.0759346	115.8792772	86.11598188	0	0
PRR9	932.1401334	13.79020428	2.630153151	5.243118361	1.58E-07	1.10E-06	113.2793205	24.97751205	160.2846855	0	0
ERVW-1	3507.060941	13.7604612	2.029218402	6.781163224	1.19E-11	1.71E-10	246.5955583	252.8870728	338.9681795	0.048298091	0
HAVCR1	562.3571105	13.71421057	2.047983873	6.69644461	2.14E-11	2.95E-10	112.7858004	122.0212884	52.95033736	0	0
IRF6	1093.095599	13.58306985	1.49595002	9.079895497	1.09E-19	5.21E-18	78.96322081	98.88637967	83.43979155	0	0
UCA1	5409.779841	13.56643678	1.887916479	7.185930591	6.68E-13	1.21E-11	408.5030623	520.6378126	478.8947028	0.048298091	0.038674338
MIR205HG	1311.299185	13.41057695	1.598516005	8.389391732	4.89E-17	1.62E-15	289.6305137	184.383175	145.278904	0	0.038674338
OVOL1	1373.361643	13.28873696	1.66063443	8.002204892	1.22E-15	3.34E-14	89.12973549	160.3064913	311.2027048	0	0.038674338
ERVV-2	1669.267561	13.20216948	2.403322212	5.493299821	3.94E-08	3.09E-07	59.48562634	57.69395816	82.62737662	0	0
TFCP2L1	1542.844369	13.14906336	1.531170466	8.587589459	8.88E-18	3.23E-16	130.256413	182.0492108	202.7692071	0	0.038674338
SLC52A1	396.6317536	13.14690514	1.521801308	8.639041817	5.67E-18	2.10E-16	60.14365318	47.98958053	83.96547179	0	0
PAGE4	295.5146631	13.11142302	2.203426867	5.95046889	2.67E-09	2.57E-08	14.24628109	33.53538093	137.3459112	0	0
S100A14	433.6567406	13.02567835	2.382921065	5.466265139	4.60E-08	3.54E-07	147.9244336	1.719763125	28.62567877	0	0
AL033519.3	273.3655222	13.01272887	1.516258933	8.582128414	9.31E-18	3.38E-16	36.05987084	69.896087	69.53315962	0	0
MAGEA8	691.7349474	12.99144888	1.549499495	8.384287261	5.10E-17	1.68E-15	39.21839967	77.02081994	57.15577932	0	0
ERVFRD-1	1029.480802	12.89829009	2.516721339	5.125037043	2.97E-07	1.95E-06	41.25828287	144.7467297	233.6409742	0	0.038674338
INSL4	1174.918955	12.76952595	2.431383279	5.251959269	1.50E-07	1.05E-06	91.69604016	20.67810424	36.51088244	0	0
HSD3B1	11802.85209	12.64986178	2.153382088	5.874415811	4.24E-09	3.95E-08	294.2696029	180.4113411	271.9678429	0.048298091	0.038674338
CGB3	51022.86314	12.58483688	1.881481627	6.688790736	2.25E-11	3.10E-10	518.0974325	209.1969001	1107.512697	0.144894274	0.077348676
CGA	1059485.586	12.5676548	1.355763244	9.269800501	1.86E-20	9.83E-19	17474.49496	12441.70822	31639.97708	4.636616753	2.823226678
TINAGL1	494.8111518	12.55274006	1.783209606	7.03940805	1.93E-12	3.17E-11	42.54143521	39.80023232	45.35186837	0	0
AC005176.1	239.5210299	12.4465627	2.452428628	5.075198748	3.87E-07	2.48E-06	28.26225278	34.64094294	55.19642568	0	0
CGB5	36947.34584	12.40822693	1.691399621	7.336070537	2.20E-13	4.29E-12	466.4423256	219.965893	665.9412916	0.144894274	0.038674338
ANO9	272.6083563	12.39978201	1.558715767	7.95512708	1.79E-15	4.77E-14	18.75376494	43.93585316	51.80339865	0	0
BRDT	2212.653833	12.3955186	1.233234866	10.05122296	9.07E-24	7.44E-22	210.1408714	258.3329894	179.3047525	0.096596182	0
TACSTD2	158.1009871	12.32794896	1.648467872	7.478428406	7.52E-14	1.55E-12	27.83453533	58.22626579	23.94234568	0	0
KCNN4	192.346092	12.30847956	1.616398502	7.614755609	2.64E-14	5.90E-13	37.47462854	24.19952397	45.78197039	0	0
S100P	6398.269398	12.29786555	2.001345265	6.144799582	8.01E-10	8.38E-09	130.4209197	419.0489481	462.4074588	0.144894274	0
SLC52A3	463.8611823	12.28179676	1.745328373	7.036954735	1.96E-12	3.22E-11	23.06384074	36.68827999	45.78197039	0	0
KDF1	977.3817964	12.27234864	1.489912487	8.236959382	1.77E-16	5.34E-15	31.15757088	40.29159321	33.88248122	0	0
ALDH3B2	478.7193694	12.26845974	1.690256258	7.258343034	3.92E-13	7.37E-12	21.02395754	36.85206696	46.64217443	0	0
C1orf210	340.6206241	12.16072936	1.487123027	8.177352609	2.90E-16	8.51E-15	34.61221179	37.75289526	25.32822997	0	0
H19	36288.57458	12.1547502	0.667604636	18.20650957	4.58E-74	3.38E-70	2084.694832	4543.327548	3870.488063	0.869365641	0.850835437
CDH5	1332.498665	12.06473021	1.706771685	7.068742884	1.56E-12	2.64E-11	124.5644808	109.901053	211.2756692	0	0.077348676
TMEM247	185.6471327	12.06368104	1.740963875	6.929311522	4.23E-12	6.58E-11	28.13064741	23.91289678	38.66139253	0	0
BIN2	2384.212519	12.04808537	1.240037517	9.715903914	2.58E-22	1.74E-20	119.9253916	212.2269589	176.3896166	0.096596182	0
MRGPRX1	170.2173937	11.95772882	2.713335546	4.407021768	1.05E-05	4.94E-05	49.64812508	2.047337053	32.59217516	0	0
CGB8	83084.64781	11.86091565	1.686412631	7.033222728	2.02E-12	3.29E-11	893.7320542	452.3795953	1508.79788	0.338086638	0.232046028
PSG4	17942.76987	11.83989486	2.122443282	5.578426977	2.43E-08	1.98E-07	168.4219697	90.81987168	166.2105355	0.048298091	0.038674338
OLR1	613.406652	11.75744102	2.352188338	4.998511739	5.78E-07	3.57E-06	47.90435396	13.63526477	12.52074764	0	0
CLDN4	9251.925538	11.7138738	0.838214534	13.97479204	2.22E-44	2.05E-41	1111.374432	1194.334543	1055.757088	0.289788547	0.464092057
GPR32	600.2672636	11.69439651	2.063790937	5.666463739	1.46E-08	1.24E-07	12.96312875	22.39786736	34.69489614	0	0
TMPRSS2	203.4396415	11.67662027	1.622183545	7.198088221	6.11E-13	1.12E-11	13.42374754	36.15597236	20.26258397	0	0
HSH2D	870.0279641	11.6759544	1.674618345	6.97230771	3.12E-12	4.93E-11	10.66003481	29.56354705	29.19914813	0	0
DLX4	720.5713898	11.62553491	1.494098828	7.780967824	7.20E-15	1.74E-13	21.58328035	93.97277074	64.3719354	0	0.038674338
TRIML2	1191.186377	11.59941889	1.698705013	6.828389156	8.59E-12	1.27E-10	11.81158178	24.44520442	29.48588281	0	0
LTBR	271.2031286	11.57478762	1.622544127	7.133727473	9.77E-13	1.70E-11	17.17450053	28.49893178	19.35459082	0	0
SULT2A1	87.30891278	11.56409016	2.867933392	4.032203185	5.53E-05	0.000219095	3.520443594	14.00378544	45.87754862	0	0
ESRP1	4259.542014	11.52978045	0.803641706	14.34691651	1.11E-46	1.37E-43	204.6792486	228.8922826	239.9491371	0.096596182	0.077348676
NAA11	189.0294164	11.49935636	2.684540975	4.283546599	1.84E-05	8.17E-05	0	45.16425539	16.7261896	0	0
TMEM40	1650.416197	11.49837161	1.793743643	6.41026473	1.45E-10	1.73E-09	168.6851804	189.2148905	218.7307709	0.144894274	0
PSG6	20654.48191	11.48943906	1.830701112	6.27597754	3.47E-10	3.85E-09	118.90545	45.90129673	205.4453974	0.096596182	0
IL36RN	182.4902712	11.47166275	2.201230047	5.211478358	1.87E-07	1.28E-06	26.97910044	17.07479102	16.48724403	0	0
PRSS8	6993.050625	11.46397445	0.803906593	14.26033143	3.87E-46	4.39E-43	130.355117	428.5895387	259.5904626	0.144894274	0.077348676
TMEM52B	146.711885	11.43982353	1.833776741	6.238394933	4.42E-10	4.79E-09	26.91329776	18.34414	14.04999926	0	0
AC011453.2	350.4205018	11.42092048	1.46361578	7.803223107	6.03E-15	1.48E-13	64.55243301	41.43810196	50.32193614	0	0.038674338
NCF4	197.4578245	11.40222315	1.670101293	6.827264429	8.65E-12	1.28E-10	21.45167499	17.19763125	18.9244888	0	0
PSG2	26289.80829	11.39149397	1.867090901	6.101199448	1.05E-09	1.08E-08	182.1418293	68.01253691	238.4198855	0.096596182	0.038674338
CDH1	5114.51284	11.38039815	0.722267142	15.75649435	6.20E-56	2.29E-52	548.0376537	800.1402672	539.9214003	0.531279003	0
TLR7	136.6792847	11.36012687	1.895903768	5.991932219	2.07E-09	2.03E-08	23.12964343	13.22579736	19.49795816	0	0
LYPD5	498.0609429	11.31692216	1.165715506	9.708133854	2.78E-22	1.85E-20	89.32714354	104.2913495	97.53757992	0.048298091	0.038674338
AL139002.1	82.93940415	11.30131188	1.836720609	6.152983652	7.60E-10	8.00E-09	16.54937503	26.36970125	11.08707425	0	0
TNNT3	67.7605515	11.29765427	1.706880044	6.618891768	3.62E-11	4.79E-10	8.620151605	32.26603196	12.95084966	0	0
DSCR8	276.6981359	11.28758837	1.574814379	7.167567507	7.63E-13	1.37E-11	17.83252737	18.01656607	17.34744807	0	0
CLDN7	7273.387209	11.25059301	0.720061688	15.62448496	4.96E-55	1.22E-51	577.6159602	584.7194624	527.0661289	0.482980912	0.038674338
TCL1B	177.7612726	11.17672281	1.715836867	6.513860977	7.32E-11	9.12E-10	20.72784546	7.902721026	20.40595131	0	0
ERVV-1	735.7343956	11.13071128	2.457634457	4.529034516	5.93E-06	2.96E-05	23.85347295	36.85206696	62.84268378	0	0.038674338
DLX5	734.2705946	11.11282844	1.70694036	6.510378866	7.50E-11	9.31E-10	21.48457633	38.85845727	63.75067693	0	0.038674338
MS4A15	126.119129	11.05119957	1.926266785	5.737107473	9.63E-09	8.44E-08	13.1605368	7.247573169	24.32465859	0	0
DPPA3	712.1615685	11.05048548	1.64967817	6.698570472	2.10E-11	2.91E-10	10.39682407	18.05751281	16.63061137	0	0
LINC00668	321.4850343	11.02835311	1.83633475	6.00563329	1.91E-09	1.87E-08	50.93127742	106.9938344	59.35407852	0	0.077348676
DDX43	285.7241134	11.01836364	1.523161939	7.233875376	4.69E-13	8.73E-12	16.18746027	16.54248339	11.51717627	0	0
AC061975.7	227.9085425	10.89989963	1.567970353	6.951598037	3.61E-12	5.64E-11	10.66003481	11.50603424	18.30323033	0	0
KRT19	18753.51521	10.89454752	0.894618396	12.17787111	4.08E-34	1.09E-31	1364.945074	1476.94895	1097.09467	1.448942735	0
ZNF257	283.991945	10.87122214	1.761834255	6.170400027	6.81E-10	7.21E-09	14.08177438	12.77538321	12.99863877	0	0
LCMT1-AS2	3050.357804	10.82729073	1.052689217	10.28536301	8.20E-25	8.35E-23	273.8707708	314.8394921	437.174807	0.193192365	0.232046028
GCM1	9912.654201	10.8101625	1.508796106	7.164760337	7.79E-13	1.39E-11	318.2546812	581.8531905	827.1339703	0.338086638	0.386743381
TEKT4P2	101.3082442	10.80303995	1.787251433	6.044499254	1.50E-09	1.50E-08	12.17349654	19.36780852	6.738264953	0	0
CDCP1	943.2767733	10.77065752	0.905592795	11.89348852	1.28E-32	3.00E-30	192.1767386	125.7883886	84.20441736	0.096596182	0.077348676
NCF4-AS1	118.9389095	10.76775224	1.743035822	6.177585169	6.51E-10	6.91E-09	10.00200797	8.885442811	17.96870654	0	0
LINC01820	102.4907975	10.69657834	1.563365723	6.842019231	7.81E-12	1.16E-10	8.620151605	13.9628387	12.7119041	0	0
SUN3	398.8093475	10.69440985	1.569276988	6.814864384	9.44E-12	1.39E-10	28.39385815	43.73111946	22.31751584	0	0.038674338
CRB3	205.0094689	10.68708408	1.544363934	6.920055463	4.51E-12	6.99E-11	11.77868044	10.44141897	12.80748232	0	0
PRSS22	179.2884231	10.64753284	1.634711471	6.513401925	7.35E-11	9.14E-10	6.711873769	14.33135937	13.04642789	0	0
GRAMD2A	2720.025194	10.62389712	1.120479437	9.481563665	2.51E-21	1.48E-19	484.472261	484.0314261	399.5169859	0.579577094	0.038674338
LGALS13	109.6573081	10.62229524	2.843976446	3.735015194	0.000187704	0.000654419	20.10271996	4.790768705	8.697618592	0	0
TPSP2	67.69940153	10.61981602	1.560034232	6.807424997	9.94E-12	1.45E-10	9.738797233	7.28851991	16.24829847	0	0
CSF3R	2563.300886	10.61373692	1.813777879	5.851729167	4.86E-09	4.47E-08	190.9922903	275.6944076	396.60185	0.048298091	0.386743381
DOCK8	108.1992188	10.60814248	1.565175233	6.777606915	1.22E-11	1.76E-10	13.12763546	6.182957901	13.76326459	0	0
LAMB3	170.6511748	10.60166486	1.555782365	6.814362406	9.47E-12	1.39E-10	41.09377616	28.78555897	18.73333235	0	0.038674338
DLX6	215.8431885	10.57626647	1.620289948	6.527391275	6.69E-11	8.42E-10	6.185452297	11.09656683	15.05357064	0	0
CLIC3	138.1919337	10.57403519	1.568200563	6.742782424	1.55E-11	2.20E-10	9.508487839	12.28402232	10.65697223	0	0
LCP1	10559.23797	10.56420156	0.851924725	12.4003932	2.60E-35	8.53E-33	715.0119644	430.2683551	669.4298969	0.434682821	0.464092057
TC2N	161.5933648	10.55127839	1.476105262	7.148052829	8.80E-13	1.55E-11	10.42972541	12.81632995	8.745407705	0	0
PSG11	1104.424294	10.52152317	2.240392621	4.696285405	2.65E-06	1.42E-05	17.89833005	2.006390312	11.2782307	0	0
AL512347.1	120.7770215	10.49395814	1.671876041	6.276756099	3.46E-10	3.84E-09	4.77069459	10.23668527	15.48367266	0	0
CCR1	718.6654769	10.46956935	2.137321321	4.898453616	9.66E-07	5.69E-06	6.448663033	9.008283034	14.5278904	0	0
TPTEP1	145.3057883	10.46297141	1.713734109	6.105364513	1.03E-09	1.05E-08	8.554348921	9.950058079	11.46938715	0	0
TRIM60	327.0217898	10.43698966	1.479964647	7.052188499	1.76E-12	2.94E-11	11.5154697	8.84449607	9.12772061	0	0
ELF5	105.1032038	10.43286512	1.717234369	6.075388022	1.24E-09	1.25E-08	14.70689988	47.29348593	20.07142752	0.048298091	0
SPDYC	247.0688695	10.40524109	1.603806066	6.487842459	8.71E-11	1.07E-09	12.37090459	9.540590668	7.024999632	0	0
COX7B2	77.30928162	10.39453455	1.851883878	5.612951583	1.99E-08	1.65E-07	3.388838226	23.87195004	1.768197186	0	0
TCL6	850.9306382	10.37610182	1.558933953	6.655895718	2.82E-11	3.82E-10	29.6112078	9.049229775	38.1835014	0.048298091	0
SLC27A6	1307.794795	10.36597874	0.741614738	13.9775792	2.14E-44	2.05E-41	256.4330596	314.4709714	203.4860438	0.048298091	0.386743381
LINC01960	85.93043183	10.33772218	1.738745098	5.945507594	2.76E-09	2.64E-08	11.44966702	8.435028659	7.694047216	0	0
PLA2G4F	160.9007927	10.32865179	1.700269632	6.074714032	1.24E-09	1.26E-08	10.66003481	9.253963481	7.502890763	0	0
ST14	280.0976872	10.32107058	1.151398853	8.963940299	3.13E-19	1.38E-17	55.83357738	55.85135481	39.282651	0.096596182	0
S100A9	798.5883218	10.31985427	2.082627223	4.955209533	7.23E-07	4.38E-06	3.355936884	3.152899062	20.21479486	0	0
APOBR	101.5658723	10.30325094	1.575630084	6.539130624	6.19E-11	7.86E-10	6.909281821	5.978224196	13.8110537	0	0
PSG1	4226.559611	10.29683969	2.199136831	4.682218745	2.84E-06	1.51E-05	9.936205285	2.784378392	13.8110537	0	0
AC116618.1	118.5009257	10.29620599	1.769289222	5.819402423	5.91E-09	5.37E-08	8.225335501	8.394081918	10.08350287	0	0
XIST	340.1803522	10.28200504	2.044961854	5.027969113	4.96E-07	3.10E-06	28.92027962	23.70816308	22.98656342	0.048298091	0
SIGLEC14	32.40363702	10.26092534	1.571746057	6.528360795	6.65E-11	8.38E-10	10.03490931	7.657040579	8.410883913	0	0
MIR520F	47.11031574	10.25179505	1.562573809	6.560838916	5.35E-11	6.89E-10	8.554348921	8.885442811	8.506462139	0	0
LINC02434	119.5421031	10.24628354	1.530599147	6.694295862	2.17E-11	2.99E-10	5.527425456	9.663430891	10.60918312	0	0
PRRG4	90.11029387	10.23848604	1.538128153	6.656458386	2.81E-11	3.81E-10	7.600210003	10.85088638	7.311734311	0	0
ERVH48-1	9323.337061	10.2299222	1.07161225	9.546290831	1.34E-21	8.23E-20	438.2787768	603.6368568	371.8948785	0.724471368	0.116023014
TNNI2	450.6453383	10.22298729	1.696419276	6.026215003	1.68E-09	1.66E-08	3.158528832	9.21301674	12.90306055	0	0
PLAC4	2033.522144	10.21390995	2.024702387	5.044647559	4.54E-07	2.87E-06	15.33202537	11.83360817	43.91819498	0.048298091	0
TMEM125	76.24834058	10.20534254	1.566296072	6.515589688	7.24E-11	9.05E-10	9.574290523	7.616093838	7.932992782	0	0
PSG3	23016.106	10.18019632	1.096217877	9.28665417	1.59E-20	8.45E-19	104.4946622	39.80023232	168.3132565	0.048298091	0.154697352
MGLL	2510.002985	10.1653682	0.754412855	13.47454267	2.21E-41	1.48E-38	379.5827827	251.8634043	240.33145	0.144894274	0.425417719
TFAP2C	2206.577201	10.16517544	0.861748551	11.79598786	4.09E-32	8.88E-30	166.7440013	235.935122	273.0192034	0.096596182	0.348069043
OR7E91P	60.56556086	10.16274044	1.954395601	5.199940297	1.99E-07	1.36E-06	6.185452297	11.58792772	6.69047584	0	0
CGB2	360.7190498	10.15410293	2.258656474	4.495638468	6.94E-06	3.40E-05	10.79164018	4.954555669	8.458673026	0	0
LEP	5686.334415	10.14889111	1.703418877	5.957953877	2.55E-09	2.47E-08	12.17349654	13.55337129	117.3222728	0.096596182	0
GTSF1	664.6417675	10.14263669	1.277133318	7.941721159	1.99E-15	5.26E-14	213.1677948	15.92828227	65.13656121	0.193192365	0
CYP11A1	11153.52003	10.13167415	1.513183408	6.695602199	2.15E-11	2.96E-10	313.3523812	300.8766533	621.736362	0.772769459	0
PITX2	189.4638558	10.12039367	1.857767554	5.447610303	5.11E-08	3.90E-07	11.5154697	6.101064419	6.117006482	0	0
DSCR4	73.49956982	10.11051358	1.534612838	6.588315521	4.45E-11	5.81E-10	8.949165025	6.223904642	8.315305687	0	0
AC010328.1	653.762531	10.10969577	1.945765563	5.195741956	2.04E-07	1.38E-06	26.09076421	34.84567665	66.42686727	0.048298091	0.038674338
ZNF860	117.4930838	10.10908675	1.585096526	6.37758432	1.80E-10	2.11E-09	7.929223423	9.172069999	6.451530274	0	0
LINC01524	89.25275831	10.10507823	1.483467342	6.811796889	9.64E-12	1.41E-10	6.613169743	9.745324374	7.120577858	0	0
PSG5	6847.898241	10.06047529	2.079274427	4.838454779	1.31E-06	7.47E-06	61.32810149	22.02934669	111.1574772	0.096596182	0.038674338
KRT14	96.00678388	10.03299483	1.954601057	5.133014124	2.85E-07	1.88E-06	16.87838845	3.030058839	2.532822997	0	0
CLDN3	39.33679845	10.01494033	1.596849807	6.271685845	3.57E-10	3.94E-09	2.171488572	13.67621152	6.260373822	0	0
MFAP5	4261.417182	10.00051478	1.187520509	8.421340685	3.72E-17	1.25E-15	118.9383513	57.16165053	86.5460839	0.193192365	0
TEX37	56.23043955	9.997705373	1.596299641	6.263050567	3.78E-10	4.15E-09	9.146573077	4.872662187	7.694047216	0	0
PITX1	46.63163216	9.967211375	1.888949026	5.276590971	1.32E-07	9.29E-07	4.60618788	9.335856963	7.359523424	0	0
KCNK1	214.4369844	9.964112339	1.569916405	6.346906311	2.20E-10	2.52E-09	39.77772248	9.909111338	8.888775045	0.048298091	0
AC120498.4	121.6562453	9.94685517	1.555510313	6.394592878	1.61E-10	1.90E-09	6.942183163	5.937277454	8.076360121	0	0
AC003973.3	379.6452828	9.920683984	2.074746758	4.781636093	1.74E-06	9.70E-06	7.073788531	7.411360133	6.164795595	0	0
MYCNUT	864.1197936	9.919551961	2.106189213	4.709715491	2.48E-06	1.34E-05	5.297116062	3.439526249	11.66054361	0	0
DACT2	86.20686958	9.906334009	1.631634485	6.071417403	1.27E-09	1.28E-08	4.046865066	3.234792544	12.90306055	0	0
AL773572.1	1150.21982	9.899764237	2.089092854	4.738786129	2.15E-06	1.17E-05	11.08775226	9.131123258	32.49659694	0	0.038674338
ANXA8	39.61461618	9.891046141	1.804056303	5.482670428	4.19E-08	3.27E-07	9.376882471	6.060117678	4.826700427	0	0
GPR1-AS	586.732994	9.88584122	2.018847273	4.896775181	9.74E-07	5.72E-06	12.33800325	6.387691606	33.50016831	0	0.038674338
DLX3	2003.44061	9.884874511	1.004090855	9.844601677	7.23E-23	5.23E-21	111.0420293	185.652524	200.2363841	0.386384729	0
LINC01949	510.9622092	9.883778904	1.043125301	9.47515979	2.66E-21	1.56E-19	41.91630971	61.6248453	51.42108574	0	0.116023014
AL136537.2	48.92081602	9.881024984	1.550623876	6.372289976	1.86E-10	2.18E-09	8.389842211	6.797159017	4.922278654	0	0
SLC22A11	707.7901909	9.838944757	1.018076628	9.664247749	4.28E-22	2.76E-20	95.6442012	99.25490034	189.7227792	0.048298091	0.270720366
CEBPA	74.06489446	9.837694269	1.744809717	5.638261969	1.72E-08	1.44E-07	4.573286538	6.264851383	8.554251253	0	0
LAD1	518.7077947	9.82394538	1.195804093	8.215346841	2.12E-16	6.32E-15	39.44870906	23.54437611	36.94098446	0	0.077348676
AP000547.3	140.1650175	9.813855079	1.538625079	6.378327777	1.79E-10	2.10E-09	7.567308661	4.913608928	6.642686727	0	0
HYAL4	212.8437754	9.803094451	1.491156812	6.574153953	4.89E-11	6.34E-10	7.238295241	6.674318794	5.113435106	0	0
AADACL2-AS1	51.27436074	9.798557429	1.541993314	6.354474652	2.09E-10	2.42E-09	5.132609352	6.182957901	7.59846899	0	0
LINC00456	45.01711593	9.776255727	1.962597713	4.981283564	6.32E-07	3.87E-06	8.488546237	6.633372053	3.631972599	0	0
CSF2RB	1137.128293	9.755746334	2.207016332	4.420332642	9.85E-06	4.66E-05	11.87738446	13.10295714	27.66989651	0.048298091	0
ANGPT4	222.8294172	9.754039979	1.889279287	5.162836457	2.43E-07	1.63E-06	4.803595932	1.719763125	11.61275449	0	0
CYP19A1	32682.24321	9.731083538	1.481842921	6.566879256	5.14E-11	6.65E-10	579.5571394	669.9705773	1808.196674	0.434682821	2.436483298
PSG8	383.9222477	9.722435956	2.229841345	4.360146957	1.30E-05	5.99E-05	6.284156323	2.415857723	9.12772061	0	0
SP6	620.4746218	9.681542759	1.496451451	6.469667126	9.82E-11	1.20E-09	73.96221682	93.19478266	107.5732937	0.241490456	0
ERP27	404.6703154	9.675976589	1.245980542	7.765752564	8.12E-15	1.95E-13	54.08980625	38.73561705	37.84897761	0	0.116023014
LINC01687	52.05786581	9.670320476	1.602029791	6.036292538	1.58E-09	1.57E-08	5.165510694	7.28851991	4.922278654	0	0
CST7	25.84097981	9.645489998	2.055324848	4.692927256	2.69E-06	1.44E-05	13.58825425	1.351242455	2.198299205	0	0
IRX4	29.31546709	9.644113673	1.788484527	5.392338332	6.95E-08	5.20E-07	4.244273118	5.855383972	6.881632293	0	0
DLX6-AS1	136.4678631	9.63462323	1.558102313	6.183562625	6.27E-10	6.66E-09	5.922241561	5.445916562	5.543537125	0	0
DPP4	1909.448483	9.615674431	1.084424035	8.867079777	7.51E-19	3.20E-17	370.1071962	251.8224576	320.3782145	0.434682821	0.464092057
CGB7	24834.20269	9.590913561	1.472206144	6.514653944	7.29E-11	9.09E-10	105.7449132	142.6174991	399.4691968	0.289788547	0.348069043
AC090826.2	255.208291	9.558022085	1.536136094	6.222119329	4.90E-10	5.29E-09	15.4307294	11.6698212	16.63061137	0.048298091	0
ECEL1P2	32.221061	9.546569863	1.721620248	5.545107799	2.94E-08	2.36E-07	2.13858723	5.404969821	8.267516574	0	0
HNF4A	77.63254344	9.543656368	1.954405322	4.883151033	1.04E-06	6.08E-06	2.862416754	3.685206696	9.175509723	0	0
NCMAP	74.72930779	9.534862887	1.695583553	5.623351836	1.87E-08	1.56E-07	3.026923464	5.077395892	7.59846899	0	0
GPR146	99.29373832	9.51590624	1.675674786	5.678850288	1.36E-08	1.16E-07	0.65802684	9.950058079	5.01785688	0	0
DEGS2	41.09159536	9.505015324	1.554526307	6.114412657	9.69E-10	9.99E-09	4.211371776	7.28851991	4.014285504	0	0
ARL11	183.856465	9.493489125	1.516791517	6.25892815	3.88E-10	4.26E-09	17.73382334	13.30769085	10.8959178	0.048298091	0
ST8SIA6-AS1	189.4901537	9.483103947	1.235118183	7.677891944	1.62E-14	3.70E-13	27.63712728	25.26413924	25.75833198	0	0.077348676
TRIML1	35.56099476	9.471230111	2.069296405	4.577029221	4.72E-06	2.40E-05	3.586246278	3.111952321	8.267516574	0	0
MACC1	300.1111939	9.459087051	1.066331555	8.870680991	7.27E-19	3.11E-17	33.36196079	60.31454959	22.07857027	0	0.116023014
AC126175.1	117.3940471	9.455091966	1.696534868	5.573178687	2.50E-08	2.04E-07	5.560326799	5.691597008	3.727550825	0	0
PKP3	148.6714843	9.439859339	1.587177716	5.947575527	2.72E-09	2.62E-08	11.18645628	13.9628387	14.1933666	0	0.038674338
LINC01446	40.44225881	9.428446264	1.835954536	5.135446482	2.81E-07	1.86E-06	7.007985847	6.101064419	1.67261896	0	0
VAV1	138.8927896	9.392167351	1.896106205	4.953397297	7.29E-07	4.41E-06	2.171488572	3.971833883	8.028571008	0	0
SLC28A3	24.31141161	9.386861311	2.073142538	4.527841736	5.96E-06	2.97E-05	7.468604635	5.118342633	1.768197186	0	0
ZNF300P1	115.0649113	9.380950986	1.868493849	5.02059506	5.15E-07	3.21E-06	4.573286538	5.978224196	3.679761712	0	0
EPAS1	4447.499437	9.356076246	1.001290483	9.344017949	9.27E-21	5.13E-19	53.36597673	97.94460463	127.2624083	0.241490456	0.077348676
GRB7	1492.229313	9.341243773	0.967079496	9.65923051	4.49E-22	2.87E-20	34.34900105	43.73111946	61.60016684	0	0.154697352
AC022784.1	494.7561804	9.243614957	2.304091939	4.01182557	6.03E-05	0.000236673	54.64912907	0.982721786	66.80918017	0.144894274	0
MUC15	765.2540673	9.23700755	1.864513029	4.954112632	7.27E-07	4.40E-06	189.9723487	96.75714914	201.4311119	0.531279003	0.038674338
SYT8	80.89082654	9.226241841	1.849387213	4.988810227	6.08E-07	3.73E-06	0.559322814	7.411360133	4.778911314	0	0
FAM198A	71.15687968	9.197564201	1.569885803	5.858747294	4.66E-09	4.30E-08	1.15154697	4.749821964	6.547108501	0	0
PPARG	1649.441057	9.191190016	1.116682937	8.230796506	1.86E-16	5.59E-15	127.5256016	125.870282	153.3552641	0.144894274	0.386743381
IGFL2-AS1	58.31973009	9.172898222	1.545709917	5.934424125	2.95E-09	2.82E-08	3.882358356	10.68709942	17.96870654	0	0.038674338
TRPV2	1365.287805	9.169478222	1.028769403	8.913054953	4.96E-19	2.15E-17	223.7291256	126.7301636	167.3574742	0.289788547	0.386743381
ETV7	29.62811443	9.166711766	1.701397482	5.387754396	7.13E-08	5.32E-07	1.842475152	4.504141517	5.830271803	0	0
AP000688.2	54.07853483	9.151026133	1.999091896	4.57759153	4.70E-06	2.39E-05	6.942183163	3.111952321	2.102720978	0	0
LINC01194	72.70014661	9.139246237	1.59675861	5.72362421	1.04E-08	9.07E-08	4.310075802	3.767100178	3.918707278	0	0
AC009502.1	27.04547647	9.132450482	1.699921848	5.37227667	7.77E-08	5.74E-07	7.402801951	2.825325134	1.768197186	0	0
OR7E62P	25.7599322	9.121242326	1.814240893	5.027580606	4.97E-07	3.11E-06	4.244273118	2.088283794	5.447958898	0	0
RAB25	1812.051875	9.11525604	0.76637507	11.89398821	1.27E-32	3.00E-30	140.9822505	154.4101606	170.7982904	0.096596182	0.541440733
APBB1IP	36.85944121	9.109100687	1.747607222	5.212327217	1.86E-07	1.28E-06	3.684950304	4.545088258	3.536394373	0	0
A2ML1	145.1776413	9.095685587	1.704401616	5.336585873	9.47E-08	6.87E-07	4.902299958	12.44780928	13.42874079	0	0.038674338
GATA3	1668.769394	9.067659363	0.911520761	9.947836357	2.58E-23	2.01E-21	136.4089639	196.5034104	225.564614	0.676173277	0.077348676
KRT80	271.6645269	9.06737056	1.170625798	7.745746399	9.50E-15	2.26E-13	78.7987141	63.83596932	69.62873785	0.289788547	0
FXYD3	192.4330829	9.050783824	1.283613088	7.051021765	1.78E-12	2.96E-11	17.56931663	18.50792696	24.51581504	0.048298091	0.038674338
TREML2	4077.404702	9.046609203	1.446942586	6.252224026	4.05E-10	4.43E-09	178.6213857	39.14508446	133.044891	0.434682821	0.038674338
LINC01205	61.22257102	9.043395736	1.51885366	5.954092862	2.62E-09	2.53E-08	4.639089222	3.971833883	2.628401223	0	0
AL359220.1	109.3478933	9.041547491	1.54815174	5.840220475	5.21E-09	4.77E-08	10.29812005	9.786271115	9.844557307	0	0.038674338
LINC02484	44.60392163	9.017884901	1.502602765	6.001509589	1.95E-09	1.92E-08	3.158528832	3.521419732	4.348809296	0	0
CBLC	232.5915254	9.01386732	1.193346819	7.55343474	4.24E-14	9.14E-13	17.66802066	40.29159321	33.64353565	0.096596182	0.038674338
RAB17	791.6087657	8.994107104	1.183629493	7.598752108	2.99E-14	6.60E-13	23.19544611	36.81112022	96.86853234	0.193192365	0.038674338
AC011487.2	88.66545353	8.965543378	1.242898083	7.21341798	5.46E-13	1.00E-11	5.659030825	18.99928785	32.06649492	0.048298091	0.038674338
AC109635.4	69.67521298	8.964267255	1.642883233	5.45642385	4.86E-08	3.73E-07	15.10171598	3.644259955	9.462244402	0	0.038674338
BSPRY	93.54961587	8.961420447	1.467126781	6.108143185	1.01E-09	1.04E-08	8.653052947	10.80993964	8.984353271	0	0.038674338
FXYD4	281.494878	8.955202997	1.621091234	5.52418199	3.31E-08	2.63E-07	4.573286538	18.38508674	6.308162935	0.048298091	0
AC109454.3	30.15290584	8.941830441	1.545504458	5.785703429	7.22E-09	6.47E-08	3.94816104	4.053727365	2.485033883	0	0
AL392046.2	20.06275861	8.933964153	1.906084823	4.687075855	2.77E-06	1.48E-05	3.257232858	5.404969821	1.815986299	0	0
ALDH1A3	41.81408099	8.92935142	1.549113827	5.764167398	8.21E-09	7.27E-08	4.375878486	2.047337053	3.918707278	0	0
ANKRD2	19.50117959	8.918543518	1.901292537	4.690779216	2.72E-06	1.46E-05	8.751756973	1.14650875	0.477891131	0	0
CU459211.1	42.4087944	8.897279984	1.780663302	4.996609957	5.83E-07	3.60E-06	4.27717446	3.111952321	2.771768562	0	0
BICDL2	47.94928263	8.876157856	1.685314468	5.266766544	1.39E-07	9.74E-07	3.224331516	3.726153437	3.058503241	0	0
LINC02438	22.9446364	8.863532854	1.763475448	5.026173096	5.00E-07	3.13E-06	2.533403334	3.439526249	3.918707278	0	0
KRT8P37	79.61585326	8.863415864	1.508557585	5.87542428	4.22E-09	3.93E-08	2.30309394	44.05869339	12.61632587	0.096596182	0
PSG9	10523.94646	8.84676218	2.25297851	3.926696212	8.61E-05	0.000325384	42.27822447	10.48236571	23.84676746	0.048298091	0.077348676
AC079062.1	554.1170734	8.842673797	1.607727282	5.50010807	3.80E-08	2.98E-07	22.96513672	32.59360589	37.13214091	0	0.154697352
PIK3C2G	47.28261326	8.83819608	1.801191393	4.906861156	9.25E-07	5.47E-06	11.1206536	9.21301674	6.977210519	0.048298091	0
FES	519.9766865	8.837170889	0.907413766	9.738854773	2.06E-22	1.42E-20	54.41881967	34.92757013	16.15272024	0.096596182	0.077348676
AC108112.1	13.35373893	8.825564748	1.918065442	4.601284478	4.20E-06	2.16E-05	2.105685888	4.504141517	3.058503241	0	0
HTRA4	2418.054456	8.822091648	1.713005462	5.150066269	2.60E-07	1.73E-06	2.79661407	0.900828303	5.830271803	0	0
OOEP	154.2557417	8.818916321	1.530376485	5.762579607	8.28E-09	7.34E-08	3.421739568	4.012780624	2.198299205	0	0
ADGRF4	123.7047224	8.817322081	2.189784834	4.026570074	5.66E-05	0.000223447	11.31806165	5.691597008	8.124149234	0	0.038674338
AC061975.6	35.73727136	8.801803788	1.672725753	5.261952697	1.43E-07	9.98E-07	3.45464091	2.088283794	3.918707278	0	0
TRPV6	257.9327381	8.799739815	1.308971792	6.72263518	1.78E-11	2.50E-10	46.25928686	13.55337129	11.18265248	0	0.116023014
AC115522.1	15.43959972	8.799196753	1.678684627	5.241721175	1.59E-07	1.11E-06	2.335995282	3.152899062	3.966496391	0	0
TBX3	1503.778876	8.795513396	0.708270525	12.41829651	2.08E-35	6.97E-33	71.00109604	85.00543445	149.102033	0.482980912	0.038674338
DUXAP8	29.46259622	8.786183706	1.651308261	5.320741083	1.03E-07	7.45E-07	0.921237576	5.691597008	2.819557675	0	0
ZFP42	4615.329045	8.769364723	0.851231493	10.30197401	6.90E-25	7.17E-23	115.3521051	151.7486224	140.4999926	0.676173277	0
PAK6	150.222985	8.769297253	1.148969759	7.632313371	2.31E-14	5.18E-13	25.46563871	28.90839919	26.71411425	0.144894274	0
SPINT1	1245.479582	8.76668915	0.751922468	11.65903338	2.06E-31	4.17E-29	102.553483	167.7997449	131.0855374	0.676173277	0
DPEP2	86.1222509	8.749439659	1.71051683	5.115085398	3.14E-07	2.05E-06	3.388838226	1.064615268	4.635543975	0	0
GJA5	10175.73635	8.730729876	1.3784848	6.33356993	2.40E-10	2.74E-09	546.7545014	339.4484834	736.0001315	2.318308377	0.386743381
CLCA2	20.14030683	8.71180365	2.263070236	3.849550717	0.000118335	0.000432263	6.481564375	1.14650875	1.338095168	0	0
AC108676.1	217.3139331	8.708339519	1.184320292	7.353027368	1.94E-13	3.80E-12	27.50552191	13.88094522	36.3675151	0.144894274	0
HES2	408.0611681	8.6909597	1.118521812	7.770040427	7.85E-15	1.89E-13	45.2722466	9.868164597	32.06649492	0	0.154697352
AC129926.1	25.49929635	8.690480387	1.967366467	4.417316516	9.99E-06	4.72E-05	3.2901342	3.030058839	2.485033883	0	0
POU2F3	60.73808122	8.686222499	1.704298653	5.096655147	3.46E-07	2.24E-06	1.743771126	1.187455491	5.734693577	0	0
KRT7	849.3087213	8.661493514	1.09391874	7.917858246	2.42E-15	6.28E-14	145.2594249	88.69064115	95.76938274	0.579577094	0
AC092447.7	220.4438121	8.65045985	1.489231651	5.808673111	6.30E-09	5.68E-08	2.105685888	21.78366625	18.87669969	0	0.077348676
CARD16	445.0020953	8.64711399	2.015464546	4.290382585	1.78E-05	7.96E-05	3.059824806	2.825325134	17.96870654	0.048298091	0
CYP8B1	34.73655168	8.642069308	1.903004315	4.54127678	5.59E-06	2.80E-05	3.750752988	2.170177276	2.58061211	0	0
DPPA3P2	91.3088788	8.6351216	1.575764189	5.479958015	4.25E-08	3.31E-07	2.335995282	4.299407812	1.863775413	0	0
SCNN1B	35.90418749	8.633002879	1.863689435	4.632211095	3.62E-06	1.89E-05	0.296112078	4.258461071	3.870918165	0	0
AL512274.1	26.70876775	8.627547049	1.788067941	4.825066683	1.40E-06	7.93E-06	3.12562749	3.111952321	2.198299205	0	0
AC091987.1	35.13981726	8.624519391	1.606952139	5.367004519	8.01E-08	5.89E-07	3.61914762	2.538697946	2.246088318	0	0
ISM2	5026.366787	8.607280965	0.957067	8.993394369	2.40E-19	1.09E-17	118.90545	94.6279186	79.52108427	0.144894274	0.425417719
LINC00482	46.29206911	8.602291878	1.579620979	5.445794906	5.16E-08	3.94E-07	1.6450671	2.538697946	4.062074617	0	0
ELOBP2	192.0625737	8.594449321	1.400258851	6.137757542	8.37E-10	8.74E-09	13.71985962	31.48804388	3.201870581	0.096596182	0
AP002761.4	17.09581112	8.584770408	1.771133122	4.84704978	1.25E-06	7.18E-06	1.6450671	4.258461071	2.293877431	0	0
AP000439.3	10.90696334	8.581398682	2.257274371	3.801663985	0.000143728	0.000513535	4.11266775	1.351242455	2.676190336	0	0
AC245041.2	23.23533637	8.577126783	2.064174768	4.155232841	3.25E-05	0.000136012	5.362918746	1.760709866	1.051360489	0	0
P2RY6	1033.51684	8.574273219	1.486813796	5.766877631	8.08E-09	7.16E-08	130.6512291	218.7374908	180.786215	0.965961824	0
VSIR	4343.776642	8.551576697	1.36161167	6.280481346	3.38E-10	3.76E-09	216.4908304	115.756437	268.2880812	0.482980912	0.734812423
AL513303.1	15.26856716	8.544730662	2.164899076	3.946941803	7.92E-05	0.000302008	3.520443594	3.685206696	0.812414923	0	0
GATA2	2645.39922	8.543904747	1.425759628	5.992528179	2.07E-09	2.02E-08	200.7310876	264.8025745	280.0919921	1.352346553	0.038674338
HSPB7	101.2207332	8.533559445	1.746809389	4.885226457	1.03E-06	6.03E-06	2.63210736	1.678816384	3.536394373	0	0
LINC01451	34.33777911	8.52271928	1.764433965	4.830285207	1.36E-06	7.75E-06	4.869398616	6.305798124	10.51360489	0.048298091	0
MAGEC2	30.97912938	8.511491853	2.069107757	4.113604922	3.90E-05	0.000159642	0.427717446	1.433135937	5.78248269	0	0
TPRXL	336.479019	8.508953157	1.026049301	8.292928178	1.10E-16	3.44E-15	21.74778706	23.87195004	37.84897761	0.096596182	0.077348676
DENND2D	830.5358594	8.507696417	0.926987706	9.177787757	4.40E-20	2.22E-18	102.6192857	25.50981968	77.56173063	0.193192365	0.232046028
MIR520D	12.87717818	8.506897842	1.604375667	5.302310435	1.14E-07	8.17E-07	2.928219438	2.620591428	2.198299205	0	0
LINC01819	640.1655346	8.494805264	1.503549491	5.649834151	1.61E-08	1.36E-07	96.82864951	22.97112174	31.82754935	0.193192365	0.116023014
NOS2	402.3284425	8.476369784	1.12746179	7.518099381	5.56E-14	1.16E-12	59.35402097	6.633372053	132.9015237	0.193192365	0.232046028
NLRP12	396.9129796	8.472746448	1.630833117	5.195348536	2.04E-07	1.39E-06	3.652048962	1.801656607	2.102720978	0	0
FGFBP2	29.8193122	8.454749935	1.58107066	5.347483924	8.92E-08	6.49E-07	3.487542252	3.521419732	12.66411498	0	0.038674338
ADCY10	93.30999881	8.446231762	1.563120844	5.403441322	6.54E-08	4.90E-07	4.11266775	7.370413392	8.267516574	0	0.038674338
CGB1	86.23947281	8.432484912	1.710048597	4.931137587	8.18E-07	4.89E-06	3.520443594	0.982721786	2.819557675	0	0
AC034213.1	103.8090518	8.432137874	1.675259003	5.033333865	4.82E-07	3.02E-06	0.65802684	2.989112098	3.679761712	0	0
AL137793.1	18.84091644	8.428879334	1.885193405	4.471095279	7.78E-06	3.77E-05	2.368896624	2.825325134	2.150510091	0	0
AC099520.1	29.12626242	8.419866148	1.551028489	5.42856963	5.68E-08	4.30E-07	2.994022122	2.333964241	1.959353639	0	0
CMAHP	335.3962632	8.408660076	1.170893534	7.181404484	6.90E-13	1.25E-11	9.804599917	17.72993888	26.85748159	0	0.116023014
ELF3	5133.004588	8.393012958	0.834874055	10.05302884	8.91E-24	7.34E-22	147.0689988	372.8610241	434.8809296	1.690433191	0.348069043
KRT16P6	44.49172539	8.392538305	1.934018365	4.339430514	1.43E-05	6.52E-05	3.882358356	2.456804464	0.860204037	0	0
TRIM34	53.45533047	8.377068491	1.724390193	4.857988944	1.19E-06	6.83E-06	2.862416754	2.211124018	2.007142752	0	0
RHBG	29.58077746	8.370823107	1.681909117	4.976977068	6.46E-07	3.95E-06	2.039883204	3.111952321	1.911564526	0	0
CRYBA2	18.70092144	8.354616443	2.020073221	4.135798821	3.54E-05	0.000146596	2.46760065	2.252070759	2.246088318	0	0
THEM5	52.30816863	8.336238358	1.706472349	4.885070866	1.03E-06	6.03E-06	4.11266775	0.941775045	1.815986299	0	0
AL390961.1	18.18438341	8.333511649	2.365970942	3.522237531	0.000427921	0.001372509	0	4.586034999	2.293877431	0	0
PAX8-AS1	1112.123562	8.328832792	0.818054699	10.18126636	2.40E-24	2.19E-22	169.8367274	77.43028735	97.4420017	0.772769459	0
PSG7	464.56495	8.325638245	3.16082633	2.634006862	0.008438378	0.01945918	2.566304676	17.56615192	0.90799315	0.048298091	0
LINC02008	30.95456136	8.322169246	2.204224362	3.775554516	0.000159652	0.000564328	1.6450671	5.118342633	0.143367339	0	0
CST6	37.43021633	8.297992209	2.004264677	4.140167864	3.47E-05	0.000144034	2.895318096	2.743431651	1.099149602	0	0
LY6D	82.8440758	8.295932255	1.710280242	4.850627429	1.23E-06	7.07E-06	3.224331516	1.351242455	2.102720978	0	0
NECTIN4	1849.489127	8.290152081	1.045097432	7.932420295	2.15E-15	5.62E-14	107.7189937	99.58247427	184.8005005	0.338086638	0.618789409
ITGB4	690.4189339	8.27446563	0.777866469	10.63738566	2.00E-26	2.45E-24	150.1288236	177.586016	119.3294155	0.676173277	0.386743381
PLA2G2F	18.19531991	8.258202323	1.778068748	4.64447864	3.41E-06	1.79E-05	2.368896624	3.234792544	0.955782263	0	0
RN7SKP209	53.91297999	8.243769593	1.83084323	4.502717359	6.71E-06	3.30E-05	2.006981862	1.596922902	2.819557675	0	0
IL18	41.64964558	8.241865169	1.514277894	5.442769257	5.25E-08	3.99E-07	4.211371776	7.738934061	5.304591559	0	0.038674338
FTLP14	344.1903549	8.241829113	1.625185355	5.071316383	3.95E-07	2.53E-06	8.784658315	7.28851991	1.815986299	0.048298091	0
KRT24	8.119833447	8.241164972	2.060354626	3.999876947	6.34E-05	0.000247619	2.46760065	1.965443571	2.007142752	0	0
DAPP1	412.8307229	8.238087087	1.286631931	6.402831212	1.53E-10	1.81E-09	24.08378235	15.23218768	8.888775045	0	0.116023014
MT1G	7480.801219	8.23503378	2.121757486	3.881232343	0.000103928	0.000383916	2.599206018	0.409467411	3.34523792	0	0
LINC00308	18.62466958	8.232224747	1.822184091	4.517778851	6.25E-06	3.09E-05	2.63210736	2.006390312	1.768197186	0	0
ANKRD33	88.92686259	8.218604382	1.831045506	4.488476313	7.17E-06	3.50E-05	3.158528832	6.715265535	6.833843179	0	0.038674338
AP1M2	4895.719495	8.209266659	0.711785388	11.53334531	8.96E-31	1.72E-28	295.6185579	377.3651657	288.0249849	2.173414103	0.116023014
FGFBP1	37.98282395	8.202992696	1.588587454	5.163702303	2.42E-07	1.62E-06	1.579264416	1.269348973	3.393027033	0	0
GAST	18.59540321	8.197274855	1.800953449	4.551630616	5.32E-06	2.68E-05	2.599206018	1.883550089	1.768197186	0	0
IL27	37.05096555	8.19691768	2.010256105	4.077548954	4.55E-05	0.00018367	1.743771126	0.655147857	3.775339938	0	0
C6orf132	342.2922491	8.194036015	0.82814358	9.89446301	4.40E-23	3.33E-21	57.77475656	32.06129825	20.02363841	0.289788547	0
GOLT1A	185.7787816	8.193581391	1.488211924	5.505654979	3.68E-08	2.90E-07	6.744775111	4.053727365	6.117006482	0.048298091	0
HOXC13	17.86534889	8.183945711	1.867785273	4.381630923	1.18E-05	5.48E-05	1.6450671	2.989112098	1.577040734	0	0
AC090907.2	74.42013966	8.179358831	1.503010738	5.441982965	5.27E-08	4.01E-07	5.26421472	4.463194776	7.024999632	0.048298091	0
PAEP	193.1773275	8.178486037	1.624879231	5.033288557	4.82E-07	3.02E-06	1.513461732	0.532307634	4.062074617	0	0
TBX2	11.88253314	8.15684801	1.836263664	4.442089755	8.91E-06	4.25E-05	2.171488572	1.842603348	2.054931865	0	0
ANPEP	1446.814375	8.155165925	0.74746364	10.91045168	1.03E-27	1.40E-25	219.4190498	258.6605633	297.0093382	1.6421351	0.309394704
PPY	11.85215818	8.154411462	1.992891303	4.091749233	4.28E-05	0.000173917	1.579264416	0.737041339	3.679761712	0	0
C5orf66-AS1	16.14883877	8.144641077	2.066990431	3.940338067	8.14E-05	0.000309479	1.250250996	2.620591428	2.150510091	0	0
AC008753.3	296.0640246	8.138467118	1.828330393	4.451310961	8.53E-06	4.08E-05	2.105685888	2.129230535	1.768197186	0	0
ACKR2	1668.082277	8.132729491	1.286470281	6.321739111	2.59E-10	2.93E-09	165.855665	144.3372623	137.5848567	0.338086638	0.889509775
LINC01588	159.1168464	8.122326254	0.99716503	8.145418267	3.78E-16	1.10E-14	15.0359133	35.58271799	25.71054287	0.048298091	0.154697352
SMIM5	72.35157342	8.1203808	1.468015868	5.531534757	3.17E-08	2.53E-07	4.046865066	5.36402308	6.642686727	0.048298091	0
LHB	314.3513897	8.104944012	1.393808291	5.814963268	6.06E-09	5.50E-08	8.422743553	4.790768705	18.11207388	0.048298091	0.038674338
ADGRG5	75.40504938	8.097535102	1.07214277	7.552664933	4.26E-14	9.18E-13	9.607191865	10.85088638	11.08707425	0.096596182	0
AC004846.1	21.36949639	8.075727012	1.710264608	4.721916698	2.34E-06	1.27E-05	1.842475152	2.333964241	1.577040734	0	0
AC083864.1	12.28389457	8.074531038	1.876638572	4.30265644	1.69E-05	7.57E-05	2.072784546	0.655147857	2.962925015	0	0
ACOXL	289.220986	8.063464401	1.073600197	7.510677088	5.88E-14	1.23E-12	19.08277836	12.85727669	13.28537345	0.048298091	0.077348676
ADAM8	617.1153186	8.062493339	0.827731032	9.740474892	2.03E-22	1.40E-20	31.91430174	59.49561477	59.83196966	0.193192365	0.232046028
TINCR	1273.448192	8.056618325	0.916776996	8.787980458	1.52E-18	6.10E-17	72.97517656	93.64519682	97.34642347	0.676173277	0.038674338
FRG1DP	19.2342519	8.034948221	1.563190723	5.140094616	2.75E-07	1.81E-06	2.039883204	2.211124018	1.338095168	0	0
SLN	46.87355006	8.031422602	1.87259873	4.288918108	1.80E-05	8.00E-05	3.323035542	1.55597616	0.716836697	0	0
AC016710.1	15.27248007	8.029434556	1.641641715	4.891100467	1.00E-06	5.87E-06	1.6450671	2.497751205	1.433673394	0	0
TRIM58	45.54371396	8.024744484	1.899078063	4.225600116	2.38E-05	0.000102986	9.508487839	2.088283794	3.058503241	0	0.038674338
NLRP7	6755.830953	8.018962557	1.664973447	4.816270537	1.46E-06	8.26E-06	2.665008702	14.24946589	12.99863877	0.048298091	0.038674338
LINC00885	73.01848509	8.012055089	1.771196042	4.523528113	6.08E-06	3.02E-05	0.954138918	1.14650875	3.34523792	0	0
CCL28	72.50031523	8.002818398	2.019924542	3.961939285	7.43E-05	0.000285641	0.690928182	1.965443571	2.771768562	0	0
HTR1D	84.47654221	7.988756768	1.614354999	4.948574986	7.48E-07	4.51E-06	5.626129483	5.118342633	3.679761712	0	0.038674338
AC018682.2	17.47959266	7.978303968	1.740539339	4.583811345	4.57E-06	2.33E-05	1.381856364	0.982721786	2.962925015	0	0
CLDN6	16742.84553	7.97633276	0.581861273	13.70830664	9.05E-43	7.03E-40	1378.401723	1329.82731	1365.048228	9.852810601	1.546973522
AC010503.4	23.56947968	7.966349651	1.543146632	5.162406141	2.44E-07	1.63E-06	1.414757706	1.760709866	2.150510091	0	0
ASGR2	13.16138423	7.955222211	2.015695648	3.946638581	7.93E-05	0.000302312	2.237291256	1.269348973	1.768197186	0	0
C10orf10	1567.093278	7.949951834	1.110673125	7.157778156	8.20E-13	1.46E-11	147.4967162	209.2378468	314.69131	0.627875185	1.469624846
LINC02055	52.86254722	7.949451309	1.793472789	4.43243486	9.32E-06	4.42E-05	4.803595932	7.165679686	2.819557675	0.048298091	0
ASCL2	75.16372834	7.92975455	1.630532826	4.863290345	1.15E-06	6.66E-06	0.82253355	2.170177276	2.198299205	0	0
AC098869.2	11.5850164	7.924642905	1.624658542	4.877728275	1.07E-06	6.23E-06	2.566304676	1.55597616	1.051360489	0	0
BCAR4	804.1870267	7.915084529	1.895681714	4.175323562	2.98E-05	0.000125603	20.39883204	26.61538169	46.83333088	0.241490456	0.038674338
MIR1323	9.267784107	7.914940561	1.802271642	4.391646839	1.12E-05	5.26E-05	1.579264416	1.637869643	1.911564526	0	0
KRBOX1	18.0610231	7.90181527	1.773545409	4.45537804	8.37E-06	4.02E-05	0.888336234	1.596922902	2.58061211	0	0
OR8A1	9.386494861	7.897051505	1.726056938	4.575197567	4.76E-06	2.42E-05	1.6450671	2.497751205	0.955782263	0	0
HCAR1	110.5252522	7.88230971	1.095229691	7.1969467	6.16E-13	1.12E-11	8.324039527	11.79266143	7.311734311	0.096596182	0
LRRC15	98.78807447	7.878541316	1.551725198	5.077278714	3.83E-07	2.45E-06	1.48056039	2.006390312	1.529251621	0	0
CCKBR	543.7422008	7.878488334	0.972836161	8.098473975	5.57E-16	1.59E-14	42.14661911	47.70295334	19.16343437	0	0.348069043
DSCR4-IT1	14.36783952	7.877922181	1.596653158	4.934022235	8.06E-07	4.83E-06	1.97408052	1.596922902	1.433673394	0	0
CCR3	24.39844409	7.863605613	2.124299411	3.701740712	0.000214125	0.000736583	0.559322814	2.333964241	2.054931865	0	0
TBX20	37.37339909	7.856095519	1.549940536	5.068643176	4.01E-07	2.55E-06	6.020945587	3.316686026	3.823129051	0	0.038674338
TP63	155.2461133	7.852980745	0.893062685	8.793314147	1.45E-18	5.84E-17	22.83353135	43.81301294	18.78112147	0	0.270720366
PSCA	386.8237927	7.850424199	1.081579668	7.258294911	3.92E-13	7.37E-12	20.26722667	5.814437231	14.33673394	0.096596182	0.038674338
SIRPB2	26.72404084	7.847748564	1.834227266	4.278503928	1.88E-05	8.34E-05	11.08775226	0.696094598	1.242516942	0	0.038674338
GRHL3	519.2453045	7.847135573	0.839890528	9.343045686	9.36E-21	5.15E-19	67.02003366	132.2579736	133.2360474	0.434682821	0.657463747
C1orf61	291.7729422	7.833696902	1.141677263	6.86156864	6.81E-12	1.02E-10	14.97011061	18.50792696	42.14999779	0.096596182	0.154697352
AC109635.2	13.01300243	7.832518255	2.004078704	3.908288751	9.30E-05	0.000347546	1.447659048	1.678816384	1.720408073	0	0
PHOSPHO1	305.0269728	7.829851728	1.110921363	7.048070176	1.81E-12	3.01E-11	33.7567769	33.207807	53.76275229	0.386384729	0
PGC	144.4126047	7.826371342	1.290669588	6.063807044	1.33E-09	1.34E-08	9.376882471	6.633372053	9.940135534	0.048298091	0.038674338
MYO7A	760.2273111	7.824895956	0.4095724	19.10503722	2.29E-81	3.38E-77	191.4529091	188.96921	190.2006703	1.110856097	0.773486761
AC099552.1	46.62748362	7.815977092	1.631732423	4.789987	1.67E-06	9.34E-06	0.921237576	1.474082678	2.389455657	0	0
LY6G6C	291.1253129	7.812797343	1.55610042	5.020753957	5.15E-07	3.21E-06	40.83056543	26.1240208	19.30680171	0.096596182	0.19337169
RBM47	1729.730927	7.795502479	0.829255748	9.40060108	5.43E-21	3.04E-19	188.9524071	270.9855324	237.7508379	2.125116012	0.077348676
AC099542.1	11.97276202	7.779232993	1.909703212	4.073529827	4.63E-05	0.000186411	2.039883204	1.596922902	1.051360489	0	0
MIR518A2	7.278027639	7.777532861	2.154769694	3.609449717	0.000306847	0.001015756	1.6450671	1.842603348	1.194727829	0	0
TNS4	69.6859096	7.770664327	1.589435399	4.888946308	1.01E-06	5.92E-06	21.05685888	1.801656607	2.532822997	0.048298091	0.038674338
AC008109.1	47.05098302	7.76237631	1.523700224	5.094424866	3.50E-07	2.26E-06	3.026923464	3.439526249	5.830271803	0	0.038674338
GATA6	38.68341957	7.76025346	1.786038882	4.344952139	1.39E-05	6.37E-05	1.085744286	2.252070759	1.290306055	0	0
RHOD	132.2418603	7.750390484	1.142472888	6.78387257	1.17E-11	1.68E-10	10.10071199	7.984614508	7.216156085	0.096596182	0
CDA	543.3346264	7.730459927	1.347351045	5.737524722	9.61E-09	8.43E-08	8.850460999	15.27313442	2.198299205	0.096596182	0
CLEC4GP1	11.42059584	7.72713911	1.96723615	3.927916386	8.57E-05	0.000323904	0.855434892	2.129230535	1.529251621	0	0
14-Sep	15.27093253	7.722495973	1.728184317	4.468560384	7.87E-06	3.81E-05	2.204389914	1.637869643	0.669047584	0	0
IL1R2	33.36226102	7.713837489	1.989673346	3.876936637	0.00010578	0.000389779	2.237291256	1.187455491	1.051360489	0	0
AL390835.1	8.691464988	7.710968886	1.944186451	3.966167381	7.30E-05	0.00028099	1.085744286	1.596922902	1.768197186	0	0
LINC02435	7.378926518	7.700257872	1.758887196	4.377914563	1.20E-05	5.57E-05	1.842475152	1.392189196	1.194727829	0	0
WNT6	11.91037479	7.699180239	1.847432602	4.167502635	3.08E-05	0.00012952	0.855434892	2.538697946	1.051360489	0	0
LTK	36.84980078	7.692796829	1.628335694	4.724331019	2.31E-06	1.25E-05	2.63210736	5.323076338	3.775339938	0	0.038674338
TMC5	184.3899776	7.689711897	0.757932021	10.14564854	3.46E-24	3.08E-22	31.51948564	26.65632843	13.23758434	0.144894274	0.116023014
AC027801.4	16.46940784	7.676315091	1.723172089	4.454758257	8.40E-06	4.02E-05	0.921237576	2.006390312	1.433673394	0	0
OR8D1	14.20222657	7.675356374	1.705399383	4.500621056	6.78E-06	3.33E-05	1.546363074	1.269348973	1.529251621	0	0
AL079307.1	11.87327026	7.667071069	2.080834974	3.684612746	0.000229051	0.00078209	1.941179178	1.392189196	1.003571376	0	0
MIR205	5.781042152	7.655114933	2.440479056	3.136726339	0.001708455	0.004754158	2.072784546	1.474082678	0.76462581	0	0
APOA2	459.9019621	7.652679999	2.084599074	3.671056029	0.00024155	0.000820593	3.553344936	1.637869643	6.929421406	0.048298091	0
AC020658.6	8.867484191	7.649004797	1.699604728	4.500461001	6.78E-06	3.33E-05	2.13858723	1.228402232	0.90799315	0	0
FRG1JP	17.43461035	7.644692528	1.737067025	4.400919722	1.08E-05	5.06E-05	1.118645628	2.006390312	1.146938715	0	0
ZNF208	193.3872565	7.613822465	1.422654685	5.351841559	8.71E-08	6.36E-07	5.790636193	9.294910222	6.021428256	0	0.077348676
C5orf17	23.69274206	7.613079066	1.891325509	4.025261135	5.69E-05	0.000224454	1.283152338	1.596922902	1.290306055	0	0
ZNF728	113.7102426	7.608116109	1.815189589	4.191361693	2.77E-05	0.000118102	4.079766408	4.21751433	3.34523792	0.048298091	0
KRT8P42	28.60536377	7.580316774	1.688119443	4.49039125	7.11E-06	3.48E-05	2.105685888	0.36852067	1.577040734	0	0
GRHL2	568.8027884	7.56866354	0.634062488	11.9367786	7.61E-33	1.87E-30	38.49457014	45.40993584	37.0843518	0	0.464092057
HORMAD1	236.8797402	7.565196074	2.19830998	3.441369117	0.000578778	0.001797368	0.230309394	1.269348973	8.840985931	0	0.038674338
RPL7AP28	8.938798337	7.559750496	1.808727978	4.179595045	2.92E-05	0.000123767	0.263210736	1.883550089	1.863775413	0	0
FERMT1	87.78563179	7.553116464	1.478273862	5.109416232	3.23E-07	2.10E-06	3.652048962	3.316686026	3.727550825	0	0.038674338
AC015712.2	12.10980369	7.54509481	1.649577201	4.573956772	4.79E-06	2.43E-05	1.677968442	0.409467411	1.863775413	0	0
TRPV4	69.19482183	7.532753127	1.461792591	5.153092971	2.56E-07	1.71E-06	3.816555672	2.661538169	4.062074617	0	0.038674338
MIR1283-2	6.385454107	7.532448391	1.951111562	3.860593385	0.000113112	0.000414931	1.381856364	1.515029419	1.051360489	0	0
CLDN23	26.14623088	7.530504448	1.554196283	4.845272459	1.26E-06	7.23E-06	2.30309394	5.937277454	2.58061211	0.048298091	0
AL591438.2	8.480160109	7.514770435	1.824419608	4.118992364	3.81E-05	0.00015652	1.513461732	1.678816384	0.716836697	0	0
RBBP8NL	9.619291488	7.507158013	1.788220962	4.198115431	2.69E-05	0.000115067	1.414757706	1.064615268	1.385884281	0	0
FOXO6	80.47626905	7.501539259	1.183730236	6.337203385	2.34E-10	2.68E-09	8.093730133	15.3550279	23.12993076	0	0.19337169
NPPB	523.8954722	7.499232308	1.167221464	6.424858128	1.32E-10	1.58E-09	77.84457518	11.58792772	14.24115572	0.338086638	0.077348676
Z99943.1	14.61803651	7.496565782	1.844738566	4.063755113	4.83E-05	0.000193815	1.250250996	1.351242455	1.242516942	0	0
GPR78	105.6138716	7.484083968	1.866568676	4.009541178	6.08E-05	0.000238783	1.15154697	3.930887142	4.922278654	0	0.038674338
CALML3-AS1	9.471531142	7.472827354	2.341748744	3.191131146	0.001417169	0.004013228	0.559322814	1.187455491	2.007142752	0	0
AC015712.6	23.37991512	7.470553723	1.548493435	4.824401287	1.40E-06	7.95E-06	1.15154697	1.433135937	1.194727829	0	0
MIR520H	7.862727781	7.468906527	1.745335559	4.279352752	1.87E-05	8.31E-05	1.31605368	1.55597616	0.90799315	0	0
SH2D4A	1707.689595	7.461986127	0.744865927	10.01789162	1.27E-23	1.01E-21	224.5845605	222.0541768	200.9054317	2.46320265	0.116023014
GAL	186.5819414	7.449668894	1.675193363	4.447050148	8.71E-06	4.16E-05	1.513461732	1.105562009	1.099149602	0	0
OR8G5	13.16483039	7.448501171	1.906148549	3.907618415	9.32E-05	0.000348158	1.381856364	1.883550089	0.477891131	0	0
M1AP	467.0327346	7.440623399	0.945622302	7.86849399	3.59E-15	9.08E-14	43.46267279	31.28331017	16.58282226	0.386384729	0
RASSF6	77.00212812	7.438480893	1.255132165	5.926452288	3.10E-09	2.95E-08	10.03490931	6.14201116	4.778911314	0.096596182	0
RCN1P1	22.24529903	7.43281237	1.767948088	4.204202839	2.62E-05	0.00011234	1.513461732	1.310295714	0.860204037	0	0
MYEOV	98.46912593	7.425832186	1.221302548	6.080256036	1.20E-09	1.22E-08	41.1266775	15.47786812	12.13843474	0.289788547	0
AC114485.1	18.00756724	7.40873704	1.791940634	4.134476835	3.56E-05	0.000147383	0.789632208	1.637869643	1.194727829	0	0
WNT11	38.35596505	7.403367721	1.452748534	5.096110957	3.47E-07	2.24E-06	6.613169743	8.475975401	6.069217369	0.096596182	0
FOXI3	127.6827644	7.381624278	0.882975417	8.359943133	6.27E-17	2.03E-15	10.59423212	12.44780928	15.05357064	0.096596182	0.077348676
NUDT16P1	120.5409432	7.355651048	1.614769834	4.555231894	5.23E-06	2.63E-05	3.61914762	4.381301294	1.338095168	0	0.038674338
SLC34A2	318.0220746	7.35059305	1.403542375	5.23717216	1.63E-07	1.13E-06	6.251254981	11.4650875	7.932992782	0	0.116023014
LINC02327	35.90981529	7.340219063	1.507632281	4.868706485	1.12E-06	6.50E-06	2.697910044	3.521419732	3.010714128	0	0.038674338
AC106872.7	40.15985212	7.338289614	1.685095663	4.354820782	1.33E-05	6.13E-05	1.085744286	1.310295714	1.051360489	0	0
AP000561.1	20.41341703	7.323117375	1.624281943	4.508526002	6.53E-06	3.22E-05	3.2901342	4.053727365	1.768197186	0	0.038674338
VSTM5	84.18827993	7.320185553	1.588671334	4.607740692	4.07E-06	2.10E-05	9.343981129	32.96212656	16.05714202	0.048298091	0.232046028
TMEM30B	98.46312773	7.313915812	0.921178625	7.93973678	2.03E-15	5.34E-14	9.376882471	9.008283034	9.032142384	0.096596182	0.038674338
AL078612.2	19.93527981	7.310807596	1.888231263	3.871775528	0.000108045	0.000397631	1.184448312	0.450414152	1.720408073	0	0
SOX15	451.1226612	7.310221311	0.775570757	9.425602039	4.28E-21	2.46E-19	64.65113704	23.50342937	22.36530495	0.096596182	0.425417719
AC024230.1	8.609403613	7.303163647	2.003720744	3.644801138	0.000267599	0.000898941	0.263210736	1.760709866	1.338095168	0	0
GATA3-AS1	31.88975925	7.300477482	1.4588657	5.004214905	5.61E-07	3.48E-06	4.869398616	7.575147097	7.216156085	0.096596182	0
CLDN9	22.34959927	7.281424861	1.685562188	4.319879095	1.56E-05	7.07E-05	0.921237576	1.392189196	1.003571376	0	0
ARHGAP27	327.2936625	7.271400252	0.676343388	10.75104804	5.86E-27	7.45E-25	31.28917624	28.21230459	39.18707278	0.048298091	0.425417719
ST6GALNAC2	57.75262697	7.26600448	1.307405614	5.557574789	2.74E-08	2.22E-07	7.073788531	7.779880802	3.966496391	0.096596182	0
MCTP2	181.371323	7.259274297	0.743410405	9.764827406	1.59E-22	1.11E-20	16.28616429	20.80094446	17.58639364	0.241490456	0.038674338
HCAR2	75.29066454	7.247595213	1.707236012	4.24522161	2.18E-05	9.55E-05	0.723829524	1.023668527	1.481462507	0	0
HAND1	80.18796311	7.2435807	1.728079098	4.191695108	2.77E-05	0.000117963	1.085744286	1.678816384	0.477891131	0	0
MARVELD2	833.1179431	7.237461617	0.46770022	15.47457388	5.15E-54	1.09E-50	50.17454655	44.26342709	36.79761712	0.434682821	0.232046028
CYP2C18	38.09107679	7.20883657	1.702340758	4.234661325	2.29E-05	9.94E-05	5.198412036	5.732543749	4.587754862	0	0.077348676
ABCG2	4352.250055	7.195182916	0.743013528	9.683784537	3.53E-22	2.32E-20	402.5808207	271.9273074	295.671243	1.159154188	3.98345682
COBL	356.9420087	7.194791489	0.853076357	8.433936104	3.34E-17	1.13E-15	37.31012183	51.42910678	38.70918165	0.048298091	0.618789409
AC025569.1	64.71307188	7.193704476	1.835757033	3.918658268	8.90E-05	0.00033531	3.45464091	4.135620848	0.716836697	0	0.038674338
AC090505.1	30.90147547	7.188224774	1.697072573	4.23566139	2.28E-05	9.91E-05	1.019941602	0.491360893	1.577040734	0	0
CNOT6LP1	4.449824873	7.187200196	2.271725371	3.163762789	0.001557437	0.004374343	0.625125498	1.228402232	1.242516942	0	0
AC040162.4	23.81322177	7.182567637	1.671910092	4.296025051	1.74E-05	7.77E-05	1.743771126	0.327573929	1.003571376	0	0
ABO	14.86208637	7.180789311	1.692276123	4.243272841	2.20E-05	9.62E-05	1.019941602	1.064615268	1.003571376	0	0
C8G	63.74055271	7.177888548	1.725695695	4.159417311	3.19E-05	0.000133798	0.756730866	1.228402232	1.099149602	0	0
SNHG27	8.807062543	7.165871001	1.87746633	3.81677737	0.000135206	0.0004869	0.559322814	1.351242455	1.146938715	0	0
AL159166.1	31.78447638	7.153144377	1.920973691	3.723707622	0.000196318	0.000681364	2.63210736	3.07100558	2.293877431	0	0.038674338
AC008687.6	171.024358	7.147841466	1.59898031	4.470249833	7.81E-06	3.78E-05	1.546363074	0.450414152	1.003571376	0	0
DUSP9	31.33909496	7.14625723	1.53748138	4.648028472	3.35E-06	1.76E-05	3.158528832	1.269348973	3.584183486	0	0.038674338
AC009299.1	10.91567767	7.132649671	1.7705685	4.028451693	5.61E-05	0.000222083	1.217349654	1.105562009	0.669047584	0	0
TMPRSS3	10.49400713	7.132610322	1.724011839	4.137216555	3.52E-05	0.000145775	1.15154697	0.77798808	1.051360489	0	0
SLC5A5	526.6812905	7.130013905	0.833690804	8.552348025	1.21E-17	4.31E-16	29.51250378	32.22508522	31.06292354	0	0.502766395
RUNX1	63.76303494	7.11587952	1.200333871	5.92825021	3.06E-09	2.92E-08	9.903303943	6.592425312	6.881632293	0.048298091	0.077348676
AC002480.4	23.44147323	7.10688446	1.703368738	4.172252491	3.02E-05	0.000127066	0.888336234	5.036449151	2.246088318	0.048298091	0
A4GALT	316.236635	7.085386649	0.833789841	8.497808797	1.93E-17	6.71E-16	48.29917006	20.51431727	23.22550899	0.048298091	0.464092057
LINC01806	22.83003231	7.079150559	1.617973539	4.375319119	1.21E-05	5.63E-05	1.118645628	1.187455491	0.573469358	0	0
ARHGAP8	236.8907385	7.05848961	0.738612411	9.556418905	1.22E-21	7.53E-20	37.90234599	33.49443419	16.48724403	0.338086638	0.154697352
LINC00643	337.3319856	7.051387198	1.564191715	4.508006999	6.54E-06	3.23E-05	104.0340434	78.41300914	62.60373822	0.048298091	1.430950508
TRIM29	438.4384014	7.048708718	1.088613241	6.474943031	9.48E-11	1.16E-09	66.95423098	96.59336217	138.2539043	1.593837009	0
NKX3-1	230.1454485	7.044361307	0.933605683	7.54532822	4.51E-14	9.69E-13	11.97608849	10.89183312	7.502890763	0.096596182	0.077348676
SCNN1G	100.4650313	7.035518375	1.612889805	4.362057688	1.29E-05	5.95E-05	0.526421472	17.68899214	14.5278904	0	0.19337169
RIPOR2	1818.619335	7.030909961	0.942765606	7.457749745	8.80E-14	1.79E-12	125.2225077	97.8217644	163.8210799	1.497240827	0.657463747
TSPAN1	31.7610517	7.029293639	1.318822739	5.329976071	9.82E-08	7.10E-07	7.369900609	5.36402308	1.577040734	0	0.077348676
PLBD1	428.6208996	7.022393495	0.666944734	10.52919851	6.34E-26	7.39E-24	29.6112078	23.74910982	26.71411425	0.434682821	0.038674338
AC106771.1	12.99272614	7.015613505	1.623921404	4.320168137	1.56E-05	7.06E-05	0.690928182	1.064615268	1.003571376	0	0
TBX18	49.29302819	7.014365179	1.714930929	4.09017358	4.31E-05	0.00017491	0.230309394	2.415857723	4.587754862	0	0.038674338
CRYBG1	1110.921622	6.997678795	0.696941363	10.04055602	1.01E-23	8.15E-22	70.24436518	84.02271267	127.3101974	0.386384729	1.314927494
SEPT7P8	36.01482683	6.984786096	1.13929445	6.13079972	8.74E-10	9.07E-09	5.297116062	4.258461071	4.874489541	0.048298091	0.038674338
DUSP13	115.5679271	6.94804866	1.173935362	5.918595594	3.25E-09	3.08E-08	13.02893143	8.230294954	4.826700427	0	0.154697352
CEBPD	84.79954401	6.933348336	0.989044199	7.010150143	2.38E-12	3.85E-11	9.640093207	13.30769085	11.70833272	0.096596182	0.116023014
LARGE2	607.2592172	6.932816152	0.526223933	13.17465001	1.23E-39	6.97E-37	86.06991068	92.74436851	72.87839754	1.20745228	0.309394704
EPCAM	843.3711162	6.931794255	0.623038508	11.12578784	9.40E-29	1.41E-26	74.52153964	52.32993508	51.75560953	0.772769459	0.309394704
DYSF	1001.631294	6.911208801	0.694047401	9.957833996	2.33E-23	1.84E-21	69.98115444	39.84117906	82.96190042	1.014259915	0.154697352
ZNF750	145.6687319	6.894428021	1.358088116	5.076568995	3.84E-07	2.46E-06	9.903303943	21.08757165	33.73911388	0.144894274	0.270720366
C2orf72	565.1624347	6.860251324	1.006538879	6.815684391	9.38E-12	1.38E-10	35.13863326	46.59739133	75.9846899	0	1.082881466
CYP1A1	1934.549126	6.848732003	1.461798246	4.685141758	2.80E-06	1.49E-05	68.17158063	41.23336825	26.42737957	0.144894274	0.773486761
GDF15	3280.390493	6.840866497	0.942900262	7.255132674	4.01E-13	7.53E-12	39.74482114	27.7209437	132.8537345	0.869365641	0.425417719
SH3TC1	169.4805573	6.840437454	1.006721699	6.794765088	1.08E-11	1.57E-10	9.409783813	19.57254223	21.50510091	0.289788547	0.038674338
FUT1	282.7990664	6.831443638	1.009693954	6.765855743	1.33E-11	1.89E-10	0.954138918	15.96922902	15.24472709	0.096596182	0.116023014
PGF	4915.55631	6.820653498	0.989368786	6.893944497	5.43E-12	8.28E-11	197.0461373	283.2286079	446.5414732	4.829809118	1.005532789
MICALCL	13.0890977	6.819680017	1.84220586	3.701909848	0.000213983	0.000736436	3.2901342	1.14650875	2.293877431	0.048298091	0
RNF128	121.3941893	6.816855286	0.906103539	7.523263062	5.34E-14	1.12E-12	20.46463473	25.50981968	34.07363767	0.482980912	0.038674338
LYPD3	3587.541613	6.799420552	0.850088688	7.998483742	1.26E-15	3.42E-14	480.1950865	590.5338996	647.924796	3.815549203	8.044262316
IMPDH1P5	13.92112233	6.795500738	1.567865185	4.334237919	1.46E-05	6.66E-05	1.184448312	2.415857723	2.867346789	0.048298091	0
TJP3	182.1001283	6.792625782	0.662379724	10.2548818	1.13E-24	1.11E-22	24.51149979	22.88922826	21.36173357	0.193192365	0.270720366
CD274	746.3959012	6.741895146	1.410037682	4.781358137	1.74E-06	9.71E-06	102.9812005	106.584367	117.9435312	1.883625556	0.270720366
ZNF492	68.27838375	6.738222007	1.65660428	4.0674904	4.75E-05	0.000190995	2.072784546	2.006390312	1.959353639	0	0.038674338
AC073072.1	32.4113407	6.7330378	1.528666641	4.404516734	1.06E-05	4.99E-05	6.317057665	4.176567589	2.962925015	0.096596182	0
STS	3795.870565	6.706434627	1.270807255	5.277302754	1.31E-07	9.26E-07	328.1250838	643.3551956	586.2290509	7.77599268	2.939249692
SYT16	150.0363612	6.70537852	1.013419601	6.616586568	3.68E-11	4.86E-10	51.88541634	18.01656607	23.08214165	0	0.696138085
TSKS	69.2756871	6.702878656	1.407460427	4.76239227	1.91E-06	1.06E-05	8.060828791	3.193845803	1.720408073	0.096596182	0
LINC02267	18.30755405	6.695450743	1.651622274	4.053863191	5.04E-05	0.000201433	2.270192598	2.866271875	0.76462581	0	0.038674338
AC098679.1	36.19287352	6.658870803	1.34564374	4.948464891	7.48E-07	4.51E-06	15.79264416	2.743431651	3.679761712	0.048298091	0.116023014
MMP19	835.339985	6.658035527	0.887552362	7.50156927	6.31E-14	1.30E-12	163.6841765	162.4357218	143.6540741	3.187674018	0.038674338
ZNF662	165.7965185	6.654057407	1.144322327	5.814845389	6.07E-09	5.50E-08	8.455644895	9.008283034	8.697618592	0	0.19337169
GPRC5A	962.4832898	6.642560845	1.099947345	6.038980752	1.55E-09	1.55E-08	193.1966802	40.12780624	29.96377394	1.448942735	0.425417719
LAMC2	725.7607097	6.642126689	0.651725118	10.19160763	2.16E-24	2.01E-22	103.3102139	53.10792316	38.80475987	1.110856097	0.309394704
ZFP57	749.1409899	6.636765294	0.842296951	7.879365212	3.29E-15	8.40E-14	34.80961984	48.07147401	24.46802593	0.772769459	0
TSTD1	1822.291402	6.615704101	0.64242053	10.29808948	7.19E-25	7.42E-23	70.47467457	59.08614736	138.7317955	0.772769459	1.314927494
CSTA	74.07651195	6.614531191	1.277394074	5.178144574	2.24E-07	1.51E-06	2.072784546	23.25774893	7.59846899	0.096596182	0.154697352
AC099329.2	299.3767581	6.596476973	1.636331396	4.031259798	5.55E-05	0.000219799	14.14757706	16.87005732	16.24829847	0.241490456	0.116023014
FHDC1	1051.301942	6.594782305	0.754121971	8.744981001	2.23E-18	8.61E-17	73.0080779	87.7488661	142.6982918	0.241490456	2.243111607
NEURL1	467.8775342	6.585342769	0.88184021	7.467727935	8.16E-14	1.67E-12	46.58830028	20.67810424	49.93962323	0.241490456	0.696138085
AC004830.1	17.44906818	6.5805307	1.535758862	4.284872361	1.83E-05	8.13E-05	1.677968442	2.047337053	1.720408073	0	0.038674338
BIRC3	33.6639191	6.573065875	1.131307021	5.810152109	6.24E-09	5.64E-08	9.113671735	7.69798732	4.301020183	0.048298091	0.116023014
CXCR6	265.4935935	6.572337607	1.112058017	5.910067194	3.42E-09	3.24E-08	21.18846425	11.99739513	19.02006703	0	0.425417719
CHMP4C	254.7835912	6.551660233	0.642619013	10.19524805	2.08E-24	1.96E-22	17.0757965	15.15029419	13.28537345	0.386384729	0
TCHH	275.9826039	6.543503544	1.737033763	3.767056049	0.000165184	0.000582347	1.15154697	1.801656607	2.293877431	0	0.038674338
AC021723.1	66.83335509	6.540941137	1.287070128	5.082039428	3.73E-07	2.40E-06	3.750752988	3.480472991	3.440816146	0.048298091	0.038674338
SLCO2A1	103.3094041	6.517983949	1.291194402	5.048026802	4.46E-07	2.82E-06	21.18846425	12.12023536	3.679761712	0	0.309394704
ADAMTSL4	608.5293067	6.516132399	0.890511567	7.317291142	2.53E-13	4.90E-12	38.39586612	29.76828075	60.7399628	0.482980912	0.580115071
SYT12	122.4426545	6.507221712	1.570292744	4.143954519	3.41E-05	0.000141914	0.394816104	2.088283794	2.676190336	0	0.038674338
IQANK1	283.9025446	6.490046974	0.481209771	13.4869393	1.87E-41	1.31E-38	25.33403334	25.83739361	24.22908036	0.193192365	0.425417719
AL390729.1	21.36563661	6.485122305	1.503301838	4.313918962	1.60E-05	7.24E-05	1.710869784	1.228402232	2.150510091	0	0.038674338
C1QTNF1	146.7381053	6.483266436	0.850312806	7.624566379	2.45E-14	5.48E-13	11.1206536	8.721655847	13.61989725	0.289788547	0
HMOX1	5248.68062	6.46411672	0.918650515	7.036535236	1.97E-12	3.23E-11	205.2714728	367.3332141	569.789596	8.210675501	0.889509775
MUC4	705.5267286	6.451874422	1.132541957	5.696808302	1.22E-08	1.05E-07	1.677968442	3.971833883	8.984353271	0.048298091	0.077348676
SYT7	181.8590085	6.444478926	0.507478746	12.69901247	5.99E-37	2.27E-34	24.47859845	34.76378316	34.26479412	0.096596182	0.696138085
P2RY2	63.62346209	6.44150984	1.031523871	6.244654169	4.25E-10	4.63E-09	7.600210003	15.23218768	13.094217	0.193192365	0.116023014
FAM83F	220.3667515	6.424404173	1.044670525	6.14969411	7.76E-10	8.15E-09	8.916263683	3.152899062	2.485033883	0.048298091	0.077348676
IGFL2	30.97315408	6.418709008	1.492580191	4.300411492	1.70E-05	7.64E-05	13.7856623	0.737041339	2.246088318	0.144894274	0
CEBPB	190.3228831	6.408648946	0.841048145	7.619836014	2.54E-14	5.68E-13	6.317057665	10.35952549	17.01292428	0.144894274	0.154697352
LINC00992	35.20767268	6.399304866	1.860363942	3.439813427	0.000582115	0.00180735	1.118645628	2.907218616	1.051360489	0.048298091	0
AC093151.2	10.37514812	6.394845971	1.896449617	3.372009419	0.000746219	0.002258866	0.98704026	1.269348973	2.43724477	0	0.038674338
STYK1	234.7596856	6.361725205	0.83612347	7.608595418	2.77E-14	6.16E-13	15.06881464	9.745324374	5.830271803	0	0.270720366
ZNF676	171.1891155	6.356405985	1.777322225	3.576394811	0.000348365	0.001139641	2.270192598	1.351242455	1.003571376	0	0.038674338
SLC16A3	1086.953189	6.356197924	0.695419184	9.140095741	6.24E-20	3.08E-18	85.51058787	91.4340728	103.8457429	1.931923647	0.541440733
PROM2	133.2465687	6.345128378	0.83995485	7.554130298	4.22E-14	9.11E-13	22.86643269	11.09656683	23.08214165	0.144894274	0.386743381
AC026765.2	22.18789897	6.337205581	1.797565903	3.525437131	0.000422785	0.001357511	1.381856364	1.392189196	1.768197186	0	0.038674338
AC022730.4	18.15353347	6.332400009	1.889468436	3.351418785	0.000803986	0.002413922	0	3.357632767	1.194727829	0	0.038674338
PLEKHG6	267.3364992	6.32690802	0.568187241	11.13525184	8.45E-29	1.29E-26	18.91827165	27.80283718	29.8204066	0.289788547	0.425417719
AC105202.1	64.12387733	6.31841281	1.131647178	5.583376987	2.36E-08	1.93E-07	3.652048962	3.152899062	2.102720978	0	0.077348676
CKMT1B	274.2521168	6.302184282	0.554100764	11.37371519	5.65E-30	9.93E-28	16.08875624	13.51242455	23.9901348	0.241490456	0.270720366
MAB21L3	30.22844291	6.293310057	1.650343283	3.813333942	0.000137105	0.000492895	1.118645628	1.842603348	1.481462507	0	0.038674338
SPINT1-AS1	56.37909037	6.267964988	1.448240045	4.327987623	1.50E-05	6.83E-05	1.776672468	1.269348973	1.385884281	0.048298091	0
AC090826.1	267.3266012	6.267139551	1.022963062	6.126457332	8.99E-10	9.30E-09	4.737793248	17.44331169	22.31751584	0.386384729	0.038674338
FOXO4	978.3178272	6.259718669	0.943392169	6.635330327	3.24E-11	4.34E-10	79.68705033	236.1398557	255.95849	3.718953021	1.701670874
CLEC7A	90.29623839	6.246267266	0.864817392	7.22264298	5.10E-13	9.40E-12	3.652048962	7.575147097	6.929421406	0.193192365	0
NRBF2P2	12.15263058	6.243891876	2.121463005	2.943200923	0.003248375	0.00838903	0	3.357632767	1.290306055	0.048298091	0
IL6	77.44794436	6.243873182	1.429938719	4.366532004	1.26E-05	5.84E-05	10.95614689	7.411360133	6.977210519	0.241490456	0
ACP5	1112.578065	6.224412276	1.016664179	6.122387711	9.22E-10	9.52E-09	66.72392158	61.09253767	84.63451938	1.980221738	0
DSC1	24.21597044	6.219016368	1.092423164	5.692863876	1.25E-08	1.07E-07	2.994022122	5.937277454	3.679761712	0.048298091	0.077348676
ATP2C2	397.1139061	6.197378407	0.718038164	8.630987478	6.08E-18	2.24E-16	30.8614588	89.42768249	64.75424831	0.434682821	1.508299184
CECR7	21.71990366	6.17851513	1.793372728	3.445192979	0.000570652	0.001775495	0.131605368	2.211124018	1.959353639	0.048298091	0
KIAA0040	807.5958634	6.175995237	0.789045049	7.827176975	4.99E-15	1.23E-13	38.23135941	26.8201154	57.72924868	0.096596182	1.237578818
SMPDL3B	1088.619387	6.174127187	0.901712842	6.847110185	7.54E-12	1.12E-10	38.6919782	29.03123942	62.36479265	1.20745228	0.077348676
CCBE1	232.1805532	6.172401487	0.746857289	8.264499228	1.40E-16	4.30E-15	51.26029084	36.60638651	25.8061211	0.627875185	0.541440733
LRG1	609.8423759	6.153566385	0.665227879	9.25031344	2.24E-20	1.16E-18	25.10372395	28.53987852	19.40237994	0.531279003	0.232046028
NT5DC4	38.70046441	6.150422896	1.60288925	3.837085374	0.000124503	0.000451554	2.171488572	1.023668527	0.955782263	0.048298091	0
SPATA22	106.1846374	6.119162261	1.068022097	5.729434138	1.01E-08	8.79E-08	3.816555672	10.40047223	4.10986373	0	0.19337169
SCNN1A	292.4584647	6.115295761	1.241413436	4.926075057	8.39E-07	4.99E-06	0.98704026	4.667928481	2.007142752	0	0.077348676
CST1	195.4870988	6.114549449	1.377154517	4.439987941	9.00E-06	4.29E-05	4.902299958	0.900828303	2.150510091	0.048298091	0.038674338
AL391421.1	6.331981553	6.099012649	1.733896871	3.517517536	0.000435604	0.001394328	0.526421472	1.269348973	2.054931865	0	0.038674338
NLRP2	5427.056743	6.085115739	1.680167787	3.621730988	0.000292638	0.000972429	329.7372496	315.2489595	269.7217546	0	10.94483767
ZNF578	99.4889838	6.067981578	1.171973175	5.177577192	2.25E-07	1.51E-06	2.401797966	2.088283794	3.154081467	0.048298091	0.038674338
LRRK1	160.7917567	6.065408993	0.697816846	8.691978457	3.56E-18	1.35E-16	12.1405952	10.64615268	11.03928514	0.144894274	0.232046028
C11orf52	24.56821078	6.059665971	1.259410215	4.811510896	1.50E-06	8.45E-06	1.80957381	2.374910982	3.823129051	0.096596182	0
EPS8L2	545.6923178	6.05549365	0.537432995	11.26743931	1.90E-29	3.05E-27	36.48758828	29.93206772	51.18214018	0.82106755	0.502766395
GPR160	307.5884731	6.048731671	0.656719172	9.210530054	3.25E-20	1.65E-18	13.98307035	21.98839995	17.72976098	0.338086638	0.270720366
HSPA2	1945.544546	6.047362296	1.046249288	5.780039582	7.47E-09	6.66E-08	169.0470952	179.1010454	243.6766879	6.182155671	0
AL589843.1	25.6530173	6.044105684	1.503341572	4.020447381	5.81E-05	0.000228729	1.579264416	1.187455491	1.051360489	0.048298091	0
ACTA1	2082.05216	6.040041885	1.124271402	5.37240552	7.77E-08	5.74E-07	50.14164521	5.691597008	1.194727829	0.434682821	0.19337169
NAV2-AS4	53.06709763	6.039573454	1.332862495	4.531280217	5.86E-06	2.93E-05	3.224331516	5.609703526	10.94370691	0	0.232046028
ESRP2	525.3977053	6.039447669	0.568215919	10.62878998	2.19E-26	2.67E-24	35.59925205	31.77467107	36.12856954	0.338086638	0.850835437
CD55	1431.628684	6.031322345	0.844372084	7.142967492	9.13E-13	1.61E-11	46.39089222	73.41750673	126.8800954	0.096596182	2.939249692
B3GNT7	2679.148438	6.03126383	0.808941381	7.455748918	8.94E-14	1.81E-12	34.44770508	38.03952245	17.15629162	0.338086638	0.696138085
ITIH5	642.4422573	6.027770522	0.673057245	8.955806603	3.37E-19	1.48E-17	150.0630209	180.7389151	100.7394505	0.965961824	4.17682851
AC078881.1	322.3773615	6.010758976	1.018460647	5.901807788	3.60E-09	3.39E-08	29.70991183	25.26413924	19.45016905	0.676173277	0.154697352
TMEM191B	8.12385539	6.000217655	1.597251291	3.756589642	0.000172245	0.000605215	1.052842944	1.596922902	1.099149602	0.048298091	0
ADGRE5	1372.112644	5.990290534	0.666461951	8.988195832	2.51E-19	1.14E-17	177.0421213	116.9029457	71.01462213	3.574058747	0.464092057
UNC13D	860.4798245	5.985052674	0.687506502	8.705448824	3.16E-18	1.21E-16	30.26923464	41.27431499	51.94676599	1.255750371	0.154697352
TMEM191C	17.05326697	5.979633682	1.284034928	4.656908898	3.21E-06	1.69E-05	1.842475152	2.866271875	2.198299205	0	0.077348676
AMPD3	478.3683251	5.978148578	0.525258569	11.38134421	5.18E-30	9.21E-28	55.07684651	18.38508674	52.75918091	0.917663732	0.580115071
PON3	17.93550408	5.977895944	1.921858604	3.110476459	0.001867858	0.005136696	0.855434892	1.842603348	1.099149602	0.048298091	0
INHA	2909.997624	5.960391355	0.90844005	6.561127894	5.34E-11	6.88E-10	34.97412655	7.984614508	37.89676672	0.579577094	0.386743381
SLC40A1	1749.294853	5.955610117	1.063548518	5.599754046	2.15E-08	1.77E-07	198.0331775	281.2222176	443.4351809	1.545538918	10.32604826
TGM1	343.2575147	5.95167897	0.622894822	9.554869878	1.24E-21	7.61E-20	26.12366555	37.91668223	35.93741308	0.627875185	0.580115071
APOL6	364.9378675	5.948773211	1.158896143	5.133137465	2.85E-07	1.88E-06	7.402801951	12.12023536	8.219727461	0.289788547	0.038674338
AFAP1L1	439.662121	5.947524924	0.860352289	6.91289487	4.75E-12	7.31E-11	14.11467572	17.44331169	15.67482911	0.338086638	0.232046028
RIPK4	118.2954549	5.944813918	0.788355318	7.540779876	4.67E-14	9.96E-13	12.23929923	20.02295638	11.9950674	0.531279003	0
ANXA8L1	31.57300904	5.943006341	1.502353399	3.955797846	7.63E-05	0.000292395	4.408779828	3.930887142	3.679761712	0.144894274	0
ABCA12	105.4733531	5.937610682	1.105840724	5.36931816	7.90E-08	5.83E-07	4.013963724	8.639762365	4.778911314	0.096596182	0.116023014
ZBTB46-AS1	49.54333197	5.926284966	1.230486226	4.816213982	1.46E-06	8.26E-06	3.257232858	2.088283794	7.885203669	0.048298091	0.116023014
ABCD1	154.6574323	5.924825496	0.767506724	7.719574712	1.17E-14	2.75E-13	8.389842211	10.97372661	14.95799241	0.193192365	0.232046028
AC073174.1	13.20451282	5.921507785	2.023611842	2.926207321	0.003431222	0.008801156	1.348955022	0.77798808	1.529251621	0.048298091	0
SUSD2	654.6363154	5.908535259	1.047988902	5.637975029	1.72E-08	1.45E-07	25.49854005	5.691597008	10.08350287	0.386384729	0.116023014
AC092718.6	31.12011336	5.903854715	1.08970746	5.417834541	6.03E-08	4.55E-07	3.750752988	15.15029419	5.591326238	0	0.309394704
MIRLET7BHG	8.190183197	5.870247254	1.618752785	3.626401332	0.000287399	0.00095739	1.052842944	1.310295714	0.955782263	0	0.038674338
FAM83H	174.4550684	5.867980736	0.603970611	9.715672633	2.59E-22	1.74E-20	12.66701667	10.03195156	11.66054361	0.338086638	0.116023014
CSMD1	43.84101461	5.86550757	1.513122998	3.876424837	0.000106003	0.000390502	0	3.603313214	6.069217369	0.048298091	0.077348676
SLC19A3	658.6100826	5.843689769	0.779352638	7.498133049	6.47E-14	1.34E-12	125.354113	135.6156064	75.17227497	0.144894274	4.524897553
MUC16	10.05288542	5.833507047	1.766679534	3.301961072	0.000960114	0.002823632	1.447659048	1.474082678	0.477891131	0.048298091	0
SPINT2	6949.763146	5.823720433	0.730007328	7.977619136	1.49E-15	4.01E-14	455.6835867	591.5985149	547.3287128	18.6430632	0.850835437
FAM83G	185.3548834	5.810308126	0.648020604	8.966239787	3.07E-19	1.36E-17	8.554348921	9.745324374	12.13843474	0.048298091	0.348069043
CYP2C9	16.19850491	5.807631789	1.59745306	3.635557085	0.000277381	0.000927998	0.82253355	5.36402308	1.003571376	0.096596182	0
COL9A3	229.9944119	5.804737847	0.653726872	8.879454239	6.72E-19	2.88E-17	16.48357234	21.33325209	17.20408073	0.579577094	0.154697352
AC006262.1	21.45409631	5.803719107	1.292141348	4.491551264	7.07E-06	3.46E-05	2.763712728	1.760709866	1.577040734	0	0.077348676
AC022872.1	56.77841222	5.798593495	0.803466167	7.216972828	5.32E-13	9.79E-12	9.047869051	5.77349049	8.410883913	0.241490456	0.077348676
KLF4	281.9419046	5.781807103	1.079747906	5.354775006	8.57E-08	6.26E-07	4.671990564	5.200236115	9.748979081	0	0.270720366
AC005083.1	32.44555457	5.778873681	1.478466724	3.908693776	9.28E-05	0.000347228	1.085744286	1.228402232	0.860204037	0.048298091	0
AC131254.1	6.598985338	5.777145882	2.002231435	2.885353702	0.003909741	0.009867315	1.48056039	0.532307634	1.290306055	0.048298091	0
MT1A	33.4508142	5.77386416	1.564040632	3.691633096	0.000222819	0.0007624	1.085744286	1.392189196	0.716836697	0.048298091	0
KLF5	287.5060071	5.757094897	0.734583335	7.837225025	4.61E-15	1.14E-13	18.62215957	26.1240208	18.39880856	0.627875185	0.232046028
RASEF	42.40284237	5.751945512	1.522688799	3.777492497	0.000158415	0.000560359	0.032901342	3.930887142	9.414455289	0	0.19337169
CHAC1	1766.96929	5.74516456	0.737099774	7.794283437	6.48E-15	1.58E-13	40.86346677	256.490386	201.3355337	2.897885471	4.138154172
AC093821.1	20.64717935	5.741696024	0.981968755	5.847127002	5.00E-09	4.59E-08	3.323035542	3.316686026	2.915135902	0.144894274	0
CKMT1A	259.1333598	5.741695384	0.602544197	9.52908586	1.59E-21	9.63E-20	10.66003481	9.868164597	20.16700575	0.386384729	0.19337169
CFD	182.4107283	5.725267037	0.670077189	8.544190325	1.29E-17	4.59E-16	30.8614588	47.21159245	37.37108648	0.289788547	1.39227617
GALNT6	946.4419031	5.711841811	0.840688984	6.794238913	1.09E-11	1.58E-10	47.83855127	37.26153437	25.8061211	1.448942735	0.038674338
EPHA1	805.7963859	5.702094786	0.649250524	8.782580183	1.60E-18	6.34E-17	46.19348417	45.69656303	24.65918238	1.448942735	0.154697352
PITPNM2	247.197571	5.700493662	0.615050976	9.268327159	1.89E-20	9.92E-19	8.356940869	15.27313442	23.65561101	0.338086638	0.348069043
GBP2	472.805106	5.698379835	1.514276134	3.763104832	0.000167817	0.000590923	48.36497274	45.69656303	78.66088023	2.173414103	0.154697352
FAR2	1035.359065	5.682780469	0.68799833	8.259875379	1.46E-16	4.45E-15	101.4677387	114.8965554	213.282812	3.574058747	2.629854988
BLNK	79.19517639	5.677997661	1.669469157	3.401079701	0.000671203	0.002054975	1.776672468	1.187455491	2.389455657	0	0.077348676
ATP6V0A4	126.0398804	5.671974999	1.145724975	4.950555431	7.40E-07	4.47E-06	20.00401594	29.68638727	18.68554324	0.869365641	0.077348676
GRHL1	2406.675877	5.67125171	0.695131875	8.15852634	3.39E-16	9.91E-15	141.9692907	201.2122856	233.9754979	1.304048462	7.657518935
KLC3	15.88492202	5.667736177	1.550182306	3.656173957	0.000256008	0.00086374	1.019941602	1.105562009	0.76462581	0	0.038674338
C6orf141	128.1480601	5.664494539	0.752763325	7.524934266	5.27E-14	1.11E-12	10.98904823	6.510531829	6.403741161	0.241490456	0.116023014
KLRG2	78.52992852	5.654334969	1.005693296	5.622325406	1.88E-08	1.57E-07	3.915259698	2.252070759	2.867346789	0.144894274	0
FUT3	111.93742	5.650438387	0.920410819	6.139039515	8.30E-10	8.67E-09	4.408779828	10.23668527	18.44659767	0.338086638	0.154697352
ENPEP	1231.639899	5.634840082	1.018821468	5.530743371	3.19E-08	2.54E-07	257.4530012	352.3057601	179.495909	0.82106755	11.87302178
MYLPF	139.7850881	5.632022449	0.592409327	9.506978025	1.96E-21	1.18E-19	10.72583749	24.36331093	16.10493113	0.386384729	0.386743381
ADM2	271.9491975	5.629192005	0.598567069	9.404446542	5.23E-21	2.97E-19	8.258236843	18.50792696	23.41666544	0.338086638	0.425417719
CNKSR1	620.4248314	5.617614062	0.540062547	10.40178418	2.43E-25	2.60E-23	38.98809027	55.68756785	52.09013333	0.193192365	2.127088593
CSF1R	461.7181613	5.607935653	1.007926204	5.563835558	2.64E-08	2.15E-07	25.39983603	13.758105	7.980781895	0.193192365	0.541440733
BHLHE40	1863.011296	5.606618416	1.072683079	5.226724021	1.73E-07	1.19E-06	195.4997742	182.8681456	220.7379136	8.403867866	0.077348676
FURIN	1146.692598	5.587772852	0.575511105	9.709235508	2.75E-22	1.84E-20	97.19056428	97.00282958	173.4266916	4.346828206	1.160230142
TRPM6	60.05995028	5.586679714	0.709970301	7.868892132	3.58E-15	9.07E-14	11.7457791	7.575147097	5.01785688	0.144894274	0.232046028
GPR87	154.5207764	5.583182881	1.186451506	4.705782623	2.53E-06	1.36E-05	26.88039642	10.93277986	6.499319387	0.579577094	0.077348676
HSPD1P6	19.00396109	5.580300639	1.20613323	4.626603844	3.72E-06	1.93E-05	0.690928182	4.012780624	3.775339938	0.096596182	0.038674338
PLEKHF1	110.0879231	5.578575571	0.766842853	7.274731129	3.47E-13	6.60E-12	7.666012687	12.65254299	19.78469284	0.434682821	0.19337169
SLC27A2	78.03673358	5.578467998	0.747539495	7.462439156	8.49E-14	1.73E-12	14.08177438	22.39786736	11.89948917	0	0.773486761
PTPN6	673.4680375	5.57694763	0.450138231	12.38941118	2.98E-35	9.36E-33	37.50752988	35.9921854	30.01156305	1.304048462	0.309394704
ERICH5	237.6057612	5.572630696	0.801162134	6.955684071	3.51E-12	5.51E-11	3.94816104	8.557868883	5.161224219	0.289788547	0
PWWP2B	226.1175967	5.540398225	0.606397732	9.136574779	6.45E-20	3.17E-18	19.60919983	21.33325209	27.57431828	0.193192365	0.928184113
ARHGEF5	139.374735	5.521636975	0.683096907	8.08324107	6.31E-16	1.78E-14	5.757734851	7.370413392	9.414455289	0.386384729	0
ANKDD1B	73.21754036	5.516794279	1.41348221	3.90298105	9.50E-05	0.000354093	0.065802684	2.661538169	2.532822997	0.048298091	0.038674338
SLC28A2	68.42879926	5.507041424	1.155393459	4.766377533	1.88E-06	1.04E-05	8.422743553	8.025561249	0.286734679	0.193192365	0.077348676
SLCO4A1	2738.943388	5.506751512	1.367283581	4.027512352	5.64E-05	0.000222673	8.620151605	19.2449683	200.0452276	0.772769459	3.248644397
C6orf99	53.57308769	5.506141234	1.000651149	5.502558246	3.74E-08	2.95E-07	6.284156323	4.62698174	3.536394373	0.241490456	0
AC008687.2	42.09606785	5.504810023	1.34888515	4.08100721	4.48E-05	0.000181256	1.612165758	1.392189196	1.911564526	0	0.077348676
CCDC144B	111.8543956	5.503912009	0.642253972	8.569681547	1.04E-17	3.73E-16	8.817559657	14.69988004	9.844557307	0	0.541440733
SOHLH2	59.55579385	5.499960676	1.264657043	4.34897406	1.37E-05	6.28E-05	0.460618788	9.786271115	4.25323107	0.048298091	0.19337169
CCDC144CP	242.9099803	5.464926288	0.557656239	9.799811965	1.13E-22	7.93E-21	25.39983603	34.76378316	22.8909852	0.193192365	1.237578818
AL355512.1	41.11717037	5.459703311	1.044836275	5.22541516	1.74E-07	1.20E-06	4.408779828	8.189348213	7.59846899	0.338086638	0
BNC1	28.64869771	5.455498736	1.316470505	4.144034155	3.41E-05	0.000141905	5.659030825	3.767100178	0.286734679	0.048298091	0.116023014
ADGRE2	97.68823503	5.45299903	0.988062078	5.518883024	3.41E-08	2.70E-07	5.724833509	5.527810044	10.84812868	0	0.386743381
EFNA1	9569.746601	5.452592949	0.7030274	7.755875444	8.77E-15	2.09E-13	81.69403219	305.8721558	396.7930064	4.10533775	9.784607528
MAFF	225.6385184	5.440244742	0.719064462	7.565726062	3.86E-14	8.38E-13	9.475586497	8.598815624	14.24115572	0.289788547	0.270720366
TTC39A	158.820323	5.435328275	0.474025443	11.46632181	1.95E-30	3.64E-28	21.25426693	16.78816384	16.39166581	0.724471368	0.232046028
FADS3	909.2390118	5.427367694	0.563173256	9.637119019	5.57E-22	3.54E-20	37.40882586	81.60685494	83.15305687	0.676173277	2.97792403
HRH1	206.343459	5.42041427	0.702807598	7.712515181	1.23E-14	2.88E-13	27.20940984	7.738934061	17.06071339	0.482980912	0.425417719
AL139023.1	19.89040805	5.394620075	1.420130836	3.79867822	0.00014547	0.000518903	1.052842944	1.801656607	1.67261896	0	0.077348676
OXGR1	68.57613995	5.391068233	1.089501176	4.948198638	7.49E-07	4.51E-06	6.119649613	5.404969821	5.543537125	0	0.309394704
AC124861.1	7.928928799	5.388764612	1.789962693	3.010545768	0.002607786	0.006905111	1.447659048	1.719763125	2.246088318	0.096596182	0
CAPN12	123.8685574	5.382176734	0.757330987	7.106769465	1.19E-12	2.04E-11	5.922241561	11.95644839	14.38452306	0.386384729	0.19337169
PPL	126.86554	5.379956955	0.562681323	9.561285815	1.16E-21	7.21E-20	12.27220057	23.29869567	8.554251253	0.482980912	0.309394704
HSD3BP5	9.201667846	5.369416348	1.658466823	3.237578392	0.001205488	0.003465661	2.665008702	0.532307634	1.146938715	0	0.077348676
FAM189A2	41.65371888	5.365588774	1.093668952	4.906044707	9.29E-07	5.48E-06	4.046865066	1.965443571	0.716836697	0	0.116023014
ARRDC2	71.71579699	5.363904009	1.19906512	4.473405089	7.70E-06	3.74E-05	0.921237576	1.92449683	2.054931865	0.096596182	0
OVCH2	36.07252597	5.362399367	1.11625423	4.803922998	1.56E-06	8.75E-06	6.613169743	3.84899366	5.686904464	0.289788547	0
FOSB	195.5995582	5.358603821	1.657339539	3.23325649	0.001223876	0.003514416	6.251254981	8.721655847	15.43588355	0.048298091	0.541440733
IL17RE	33.18806524	5.352044238	0.999022431	5.357281352	8.45E-08	6.19E-07	3.553344936	4.708875223	1.194727829	0.096596182	0.077348676
PTPRE	1361.135414	5.351797164	0.766173435	6.98509883	2.85E-12	4.53E-11	57.51154582	86.1519432	65.51887412	1.883625556	1.933716903
RHOV	79.60320456	5.337986145	1.025429383	5.205610676	1.93E-07	1.32E-06	2.13858723	2.989112098	3.536394373	0	0.154697352
FLT1	498.9586658	5.329444226	0.842652399	6.32460577	2.54E-10	2.89E-09	2.237291256	6.715265535	10.51360489	0.289788547	0.077348676
AL591501.1	37.30575166	5.325655021	1.590121115	3.349213446	0.000810413	0.002428278	2.335995282	2.170177276	0.621258471	0.096596182	0
ZBED6CL	27.88257624	5.324419811	0.971437087	5.480972345	4.23E-08	3.29E-07	5.231313378	4.708875223	2.293877431	0.193192365	0.038674338
AC091806.1	311.19441	5.312343402	1.121947038	4.734932417	2.19E-06	1.19E-05	2.895318096	1.105562009	3.297448807	0.144894274	0
CLEC1A	677.3940485	5.309597838	1.093511615	4.855547729	1.20E-06	6.91E-06	25.53144139	42.33893026	61.21785394	1.835327465	0.502766395
GATA2-AS1	31.30676283	5.298817221	1.12692157	4.702028395	2.58E-06	1.38E-05	2.13858723	2.70248491	2.43724477	0.144894274	0
LVRN	1420.904363	5.29164744	0.937005808	5.647400895	1.63E-08	1.38E-07	1.546363074	4.258461071	3.201870581	0.096596182	0.077348676
ARAP2	64.47719211	5.280806731	0.847722245	6.229406816	4.68E-10	5.06E-09	5.856438877	4.831715446	4.444387522	0.096596182	0.19337169
ASNSP1	77.06492048	5.274660326	1.286185978	4.101009043	4.11E-05	0.000167747	0.49352013	10.80993964	6.069217369	0	0.348069043
DAW1	35.55265754	5.274044871	1.12275432	4.697416679	2.63E-06	1.41E-05	8.356940869	4.135620848	1.099149602	0.144894274	0.116023014
LRRC61	120.0026128	5.273633622	1.01923588	5.174105157	2.29E-07	1.54E-06	16.58227637	24.93656531	20.83605333	1.062558006	0.077348676
MYO5B	196.265488	5.26350127	0.477038274	11.03370853	2.63E-28	3.80E-26	16.450671	18.58982044	10.70476134	0.386384729	0.502766395
AC132872.4	23.02880598	5.258699277	1.204248372	4.366789607	1.26E-05	5.84E-05	1.414757706	1.801656607	3.918707278	0.144894274	0
TIMD4	7.663009017	5.256788071	1.926382672	2.728838952	0.006355774	0.015129571	1.250250996	1.801656607	0.90799315	0	0.077348676
WDR72	345.8177714	5.254589725	0.918734318	5.719378956	1.07E-08	9.28E-08	19.70790386	21.45609232	13.18979523	0.241490456	0.850835437
AL049646.1	24.95056752	5.248473365	1.256984252	4.175448782	2.97E-05	0.000125603	2.237291256	1.310295714	0.621258471	0	0.077348676
ATP1A4	466.0436126	5.240975714	1.011312046	5.182352703	2.19E-07	1.48E-06	15.00301195	38.57183008	40.76411351	1.6421351	0.116023014
CCNE1	1640.913014	5.23899085	0.429373815	12.20146796	3.05E-34	8.34E-32	100.8426132	131.1114649	170.4159775	3.042779744	5.066338285
PLCXD3	36.57256007	5.231666949	0.955794159	5.473633521	4.41E-08	3.42E-07	2.401797966	14.57703982	6.786054066	0.386384729	0.077348676
SH2D3A	333.6495008	5.218072632	0.554929472	9.403127601	5.30E-21	2.98E-19	23.42575551	21.00567817	21.74404648	0.82106755	0.502766395
SLC7A7	1310.280264	5.21062022	0.914297305	5.699043614	1.20E-08	1.04E-07	141.1796585	164.8106328	60.45322813	6.375348036	0.464092057
LINC00470	165.2883224	5.205189853	0.918928532	5.664412052	1.48E-08	1.25E-07	15.23332135	16.29680294	17.29965896	0	1.044207128
ATP6V1B1	2355.150486	5.178442589	0.897685523	5.768660022	7.99E-09	7.10E-08	27.30811386	31.69277758	28.38673321	0.772769459	1.044207128
AP000769.1	503.2050707	5.177723715	0.578434319	8.95127337	3.51E-19	1.54E-17	44.91033183	41.43810196	48.50594984	1.980221738	0.734812423
EPPK1	448.787714	5.17383048	0.436237031	11.8601359	1.91E-32	4.33E-30	13.22633949	12.93917018	14.00221015	0.241490456	0.580115071
FIBCD1	78.96919029	5.167314979	0.855830215	6.037780497	1.56E-09	1.56E-08	2.928219438	3.480472991	4.587754862	0.241490456	0
PAX9	13.6667807	5.16588446	1.252199908	4.125447085	3.70E-05	0.000152551	2.204389914	2.497751205	1.051360489	0	0.116023014
ERBB3	2716.894304	5.160812293	0.595848372	8.661284535	4.66E-18	1.75E-16	96.92735354	177.3403356	205.0630845	1.352346553	9.281841134
TMCO4	587.519422	5.158610205	0.719074719	7.173955731	7.29E-13	1.31E-11	26.05786287	33.65822116	17.49081541	1.352346553	0.19337169
AC007342.4	6.065650941	5.150472705	1.746423211	2.949154976	0.003186441	0.008256543	2.434699308	1.474082678	0.238945566	0.048298091	0.038674338
PTGES	3519.917994	5.140731995	0.613526327	8.378991696	5.34E-17	1.74E-15	496.1522374	499.7959214	553.302352	19.02944793	13.22662362
B3GNT3	72.50280061	5.125652615	1.321530891	3.878571928	0.000105071	0.000387653	0.756730866	2.661538169	7.980781895	0.241490456	0
SERPINB7	164.8611231	5.1146006	1.21786125	4.199657884	2.67E-05	0.000114386	7.040887189	7.247573169	41.86326311	1.014259915	0.154697352
BDKRB1	16.23859913	5.113014605	1.286551753	3.974200489	7.06E-05	0.000272884	1.381856364	1.351242455	4.778911314	0.048298091	0.116023014
SLC43A2	647.5919613	5.111186959	0.711527771	7.183397703	6.80E-13	1.23E-11	45.46965465	52.16614812	106.426355	2.02851983	2.436483298
RAP1GAP2	323.0375162	5.097785022	0.96696829	5.271925743	1.35E-07	9.50E-07	7.764716713	17.56615192	4.635543975	0.338086638	0.309394704
MUC3A	129.193934	5.087748643	0.878895345	5.788799169	7.09E-09	6.36E-08	9.640093207	10.15479178	9.12772061	0.434682821	0.19337169
LSR	456.3584665	5.086379809	0.403822242	12.59559102	2.23E-36	8.24E-34	29.90731988	31.11952321	27.57431828	1.062558006	0.889509775
ENDOU	193.0739011	5.079542016	1.671850763	3.038274784	0.002379369	0.006368869	4.540385196	1.55597616	2.962925015	0.193192365	0
HPDL	245.35799	5.076722917	0.988588187	5.135326301	2.82E-07	1.86E-06	35.20443594	27.76189044	30.72839975	0.289788547	1.895042565
AP005019.1	37.50492221	5.074743686	1.138305936	4.458154462	8.27E-06	3.97E-05	0.526421472	2.743431651	2.198299205	0	0.116023014
AP005119.2	35.22201462	5.07230998	0.936450139	5.416529691	6.08E-08	4.57E-07	3.092726148	3.480472991	2.43724477	0	0.19337169
MYZAP	7.031360082	5.068260163	1.373131127	3.691024159	0.000223353	0.000763873	1.842475152	1.105562009	0.90799315	0.048298091	0.038674338
DUSP5	1545.644199	5.056583764	0.998250672	5.065444887	4.07E-07	2.59E-06	111.0749306	177.0127616	255.2416533	10.33579151	1.121555804
CD19	25.73222611	5.04609302	1.543526683	3.269197142	0.001078531	0.003131795	0.460618788	1.023668527	2.007142752	0	0.077348676
CTSH	1865.212106	5.029052489	0.456348981	11.02019002	3.05E-28	4.33E-26	252.6494052	303.5381915	343.1258324	6.278751854	14.96696883
KYNU	732.9652647	5.026573772	1.475551976	3.406571814	0.000657842	0.002017839	17.50351395	2.252070759	9.462244402	0.627875185	0
BMS1P8	57.3188574	5.015588092	1.643178355	3.052369865	0.002270422	0.006103826	4.44168117	0.245680446	3.870918165	0.048298091	0.154697352
MAL2	314.0033462	5.012776055	0.637094615	7.868181486	3.60E-15	9.09E-14	22.76772867	24.19952397	20.40595131	0.144894274	1.469624846
GPR89P	26.43197456	5.012335383	1.053586658	4.757402103	1.96E-06	1.08E-05	1.414757706	1.842603348	2.198299205	0.048298091	0.077348676
ABBA01031674.1	14.40252024	5.005364003	1.213297403	4.12542217	3.70E-05	0.000152551	2.434699308	1.842603348	1.433673394	0.096596182	0.038674338
NPFFR2	151.0155376	4.99733271	0.81058299	6.165109271	7.04E-10	7.45E-09	28.06484473	15.76449531	8.506462139	0.144894274	1.121555804
STARD10	526.6300089	4.99726469	0.546564673	9.1430437	6.07E-20	3.01E-18	41.68600032	68.58579128	83.2486351	2.221712194	2.320460283
IRF8	18.42224426	4.987103355	1.296285429	3.847226269	0.000119463	0.000435736	0.65802684	1.719763125	1.099149602	0	0.077348676
C15orf48	505.3548945	4.986118118	0.984482146	5.064711575	4.09E-07	2.60E-06	1.97408052	3.971833883	1.911564526	0.193192365	0
TRHDE	41.90234364	4.981571155	0.798019624	6.242416861	4.31E-10	4.69E-09	5.362918746	6.305798124	8.984353271	0.144894274	0.348069043
FRK	89.52823072	4.97108994	0.694747377	7.155248231	8.35E-13	1.48E-11	10.75873883	11.54698098	10.46581578	0.096596182	0.696138085
AC144450.1	67.0737939	4.96035007	1.234769895	4.01722628	5.89E-05	0.000231686	1.743771126	0.77798808	1.194727829	0.096596182	0
EPN3	11.69545493	4.953031335	1.152932114	4.296030334	1.74E-05	7.77E-05	1.6450671	1.637869643	1.720408073	0	0.116023014
CASP4	2406.051701	4.94753981	1.703611588	2.904147779	0.003682543	0.009362785	4.9352013	6.960945981	34.69489614	1.062558006	0
TMEM139	52.34480314	4.943305841	0.871401756	5.672820607	1.40E-08	1.20E-07	1.776672468	3.808046919	3.154081467	0.096596182	0.116023014
TMBIM1	7610.849792	4.938383525	0.848363495	5.821070278	5.85E-09	5.32E-08	810.3929549	713.824537	508.0460618	43.70977252	1.933716903
ADAMTSL5	46.68607638	4.930644563	0.964868843	5.110170776	3.22E-07	2.10E-06	4.145569092	2.620591428	1.624829847	0.048298091	0.154697352
IFIH1	198.3109427	4.922433789	1.172926269	4.196712034	2.71E-05	0.000115749	2.566304676	4.053727365	2.723979449	0	0.232046028
SIAH1	964.3570321	4.921897535	0.553277133	8.895899071	5.79E-19	2.51E-17	47.50953785	88.77253463	184.561555	2.414904559	5.801150709
AREG	10.5763288	4.905793592	1.740168194	2.819149096	0.004815115	0.01184629	1.546363074	1.023668527	0.573469358	0	0.077348676
AP006248.3	14.14194678	4.900602411	1.429392248	3.428451789	0.000607034	0.00187682	1.118645628	0.696094598	1.385884281	0	0.077348676
ECHDC3	58.02603861	4.897496651	1.222970367	4.00459143	6.21E-05	0.000243321	6.678972427	10.27763201	7.502890763	0.579577094	0
SLC7A5	3261.334517	4.875553768	0.478397878	10.19142013	2.17E-24	2.01E-22	196.4210118	286.7909744	350.3897776	13.33027317	7.425472907
WFDC2	490.7478562	4.872275754	1.647024267	2.958229488	0.003094117	0.008054093	0	18.79455415	21.12278801	0.917663732	0.038674338
MMP15	885.5151067	4.86193347	0.730020848	6.65999263	2.74E-11	3.72E-10	29.41379975	24.40425767	47.02448733	0.338086638	2.39780896
MAFK	35.23154364	4.858934996	0.870656663	5.580770475	2.39E-08	1.96E-07	1.908277836	1.842603348	4.444387522	0.096596182	0.116023014
PITPNM2-AS1	27.96844812	4.85172504	1.214982913	3.993245492	6.52E-05	0.000253852	1.513461732	0.737041339	2.58061211	0.048298091	0.077348676
AL121839.2	32.40114639	4.847439499	1.021130915	4.747128333	2.06E-06	1.13E-05	2.30309394	1.719763125	2.150510091	0	0.154697352
PTPN3	649.571468	4.847392503	0.380784674	12.73000945	4.03E-37	1.61E-34	38.19845807	33.94484834	40.42958972	0.724471368	2.243111607
KCNK6	293.066931	4.82896387	0.751156191	6.428708073	1.29E-10	1.55E-09	14.14757706	28.21230459	16.24829847	1.352346553	0.116023014
TMEM45B	74.06925198	4.810652557	0.829998659	5.7959763	6.79E-09	6.10E-08	12.69991801	24.19952397	8.458673026	0.338086638	0.889509775
VWA1	263.7668649	4.806846888	0.585149574	8.214731921	2.13E-16	6.34E-15	38.09975404	44.09964013	34.64710703	0.772769459	2.436483298
SLC7A4	278.3972213	4.806790599	0.833024047	5.770290327	7.91E-09	7.04E-08	9.278178445	27.10674259	14.38452306	0.482980912	0.889509775
ABHD12B	482.1578164	4.796620594	0.778886746	6.158303014	7.35E-10	7.75E-09	3.388838226	8.639762365	3.488605259	0.144894274	0.270720366
AL158839.1	34.62054193	4.791507548	1.19178653	4.020441102	5.81E-05	0.000228729	12.66701667	11.50603424	2.628401223	0.676173277	0
AC062028.2	6.083828166	4.791205925	1.706956393	2.806870723	0.005002531	0.012248149	0.197408052	1.064615268	1.624829847	0	0.077348676
NMRK2	1304.151876	4.789218629	0.642680375	7.451944719	9.20E-14	1.86E-12	15.99005221	11.83360817	22.36530495	1.062558006	0.270720366
SLC7A2	1374.843616	4.776461701	0.665808367	7.173928624	7.29E-13	1.31E-11	97.25636696	126.0750157	120.5241433	1.931923647	7.889564964
AC016642.1	25.97261837	4.773612529	1.0618427	4.495592926	6.94E-06	3.40E-05	0.954138918	8.025561249	3.010714128	0.096596182	0.232046028
CPM	912.7312895	4.77310869	0.998761972	4.779025256	1.76E-06	9.81E-06	16.94419113	20.22769009	41.00305908	0.965961824	1.19890448
OVGP1	277.1026005	4.764280051	0.750950224	6.344335347	2.23E-10	2.56E-09	19.80660789	22.84828151	30.68061064	1.014259915	1.005532789
SHD	75.56545805	4.750974595	0.759289075	6.25713546	3.92E-10	4.30E-09	2.072784546	7.984614508	9.557822629	0.048298091	0.502766395
DSC3	427.8504571	4.74496154	0.810776636	5.852365901	4.85E-09	4.46E-08	109.8575809	90.16472383	84.10883913	1.304048462	7.038729526
PIM3	485.1687435	4.734970445	0.514072612	9.210703572	3.24E-20	1.65E-18	15.49653208	18.83550089	37.41887559	0.482980912	1.58564786
FAAH2	212.7428379	4.73147667	0.665616551	7.108411983	1.17E-12	2.02E-11	3.45464091	11.58792772	9.27108795	0.338086638	0.348069043
ESRRG	972.1580184	4.729757964	0.881658585	5.364613973	8.11E-08	5.96E-07	113.2464192	155.8023498	248.8379121	3.091077836	12.2984395
GLB1L3	343.7745522	4.715580966	1.038589251	4.540371435	5.62E-06	2.81E-05	13.48955022	11.71076794	8.554251253	0.627875185	0.309394704
NOC2LP1	82.51330884	4.704054662	0.60943099	7.71876511	1.17E-14	2.76E-13	12.83152338	12.3659158	10.70476134	0.676173277	0.348069043
BDKRB2	176.1077263	4.70129731	0.822735564	5.714226439	1.10E-08	9.53E-08	10.19941602	22.52070759	54.76632366	1.497240827	1.005532789
FZD5	2937.797517	4.699437868	0.465812	10.08870073	6.20E-24	5.23E-22	135.3232197	243.9606833	97.68094726	5.264491939	8.585703049
UPK1A	55.23808005	4.699159664	1.164618409	4.034935071	5.46E-05	0.000216794	2.599206018	3.767100178	3.249659694	0.048298091	0.232046028
PRLR	197.4552637	4.698757425	1.153933115	4.071949546	4.66E-05	0.00018763	4.836497274	4.094674107	8.506462139	0.482980912	0
RASGEF1A	362.9688996	4.684259572	1.117482265	4.191797685	2.77E-05	0.000117944	0.427717446	7.861774285	7.024999632	0	0.464092057
AC015849.5	3998.748086	4.681838014	1.471882185	3.180851064	0.001468431	0.004148043	4.408779828	0.941775045	8.267516574	0.241490456	0.154697352
ZNF57	221.5303543	4.677005194	1.185370015	3.945607814	7.96E-05	0.000303224	20.66204278	34.51810272	34.83826348	1.014259915	1.662996536
MYO1D	220.1935599	4.667788922	0.413795042	11.28043704	1.64E-29	2.72E-27	46.32508954	47.53916638	28.96020256	1.497240827	2.127088593
SLC30A2	280.4916094	4.665203891	0.601055969	7.761679664	8.38E-15	2.01E-13	14.57529451	6.019170937	8.171938347	0.386384729	0.464092057
TREML3P	412.1955768	4.660330439	1.566606434	2.974793373	0.00293186	0.00766826	2.401797966	0.941775045	3.34523792	0.193192365	0
NR4A1	835.5844886	4.656880856	0.956946148	4.866398039	1.14E-06	6.57E-06	42.64013924	45.69656303	62.26921443	1.593837009	2.97792403
PERP	3491.152722	4.652803936	0.441290843	10.54362221	5.44E-26	6.42E-24	396.8230859	337.769667	359.6608655	18.40157274	13.613367
ABCG1	46.90880082	4.652797394	0.7322464	6.354141711	2.10E-10	2.42E-09	3.355936884	2.70248491	8.649829479	0.289788547	0.154697352
LGALS9	50.0532138	4.642424643	0.900630461	5.154638713	2.54E-07	1.69E-06	4.803595932	9.172069999	6.451530274	0.482980912	0.116023014
SLC11A1	70.01459647	4.631448397	0.798027548	5.803619699	6.49E-09	5.85E-08	3.750752988	3.439526249	6.499319387	0.144894274	0.270720366
TNFSF12	13.65188834	4.625931208	1.216210811	3.803560343	0.000142631	0.000510029	1.052842944	1.515029419	0.382312905	0.096596182	0
CRLF1	40.61909328	4.623900619	0.73603749	6.282153669	3.34E-10	3.72E-09	4.244273118	8.107454731	2.007142752	0.241490456	0.19337169
ZNF165	1426.876703	4.621776975	0.426854357	10.82752677	2.55E-27	3.30E-25	70.90239202	83.53135177	97.20305613	3.574058747	4.099479834
ECHDC2	536.5338124	4.606003511	0.502637747	9.16366417	5.02E-20	2.50E-18	49.352013	45.08236191	33.21343363	1.448942735	2.513831974
GDPD3	190.7333477	4.601368001	0.486433321	9.459401327	3.10E-21	1.80E-19	20.56333875	18.26224652	20.7404751	0.579577094	1.276253156
AL512488.1	246.7983282	4.600306859	0.948682924	4.849151118	1.24E-06	7.12E-06	1.612165758	0.818934821	1.67261896	0.048298091	0.077348676
PKD1L2	170.5630603	4.590070931	0.844304479	5.43651141	5.43E-08	4.12E-07	13.52245156	38.69467031	6.642686727	1.593837009	0.116023014
THRB	346.9909012	4.58908494	0.697155995	6.582579761	4.62E-11	6.03E-10	46.65410296	30.50532209	32.68775339	2.946183562	0.270720366
ST3GAL4	842.2341937	4.582081575	0.440128943	10.41077085	2.21E-25	2.40E-23	39.44870906	70.38744789	95.38706983	2.46320265	4.060805496
SYNE4	215.2376058	4.566091222	0.933510127	4.891314075	1.00E-06	5.86E-06	0.49352013	8.762602588	8.840985931	0.338086638	0.232046028
AC107419.1	21.70499677	4.565766054	1.096896735	4.162439276	3.15E-05	0.000132163	1.31605368	1.883550089	0.812414923	0.048298091	0.077348676
LINC01356	809.0566382	4.5644616	1.248196759	3.656844618	0.000255339	0.000861682	3.026923464	3.357632767	2.007142752	0	0.270720366
KCNA7	163.7338771	4.548703756	1.317594572	3.45227876	0.000555873	0.001733901	5.066806668	2.620591428	9.318877063	0	0.580115071
GIPC2	40.59066158	4.546985122	0.802756364	5.664215602	1.48E-08	1.25E-07	1.381856364	3.562366473	2.962925015	0.096596182	0.154697352
SEMA7A	280.35037	4.546124478	0.648783627	7.007150438	2.43E-12	3.92E-11	21.58328035	30.83289602	36.22414776	1.545538918	1.276253156
ATAD3C	70.58414817	4.529826831	0.880770459	5.14302766	2.70E-07	1.79E-06	15.00301195	12.77538321	7.885203669	0.048298091	1.160230142
GRIN2D	84.44430753	4.521577468	0.786670949	5.747736678	9.04E-09	7.97E-08	6.251254981	4.21751433	6.355952048	0.241490456	0.309394704
PLB1	291.9419672	4.518961841	0.919987557	4.911981478	9.02E-07	5.34E-06	7.073788531	5.814437231	8.219727461	0.627875185	0.038674338
REEP1	386.6335928	4.518848539	0.646953188	6.984815318	2.85E-12	4.53E-11	63.07187262	46.18792392	62.41258176	0.434682821	5.530430342
EPB41L4B	239.5010515	4.5134263	0.657895424	6.860400811	6.87E-12	1.03E-10	21.15556291	26.57443495	18.49438679	0.869365641	1.314927494
MTND5P28	14.82375245	4.51311852	1.549190696	2.913210447	0.003577334	0.009126749	0.230309394	3.685206696	1.433673394	0.096596182	0.077348676
CHRM5	275.2935957	4.504205211	0.7180938	6.272446877	3.55E-10	3.93E-09	1.80957381	2.497751205	3.201870581	0	0.232046028
C16orf74	37.00489607	4.496092577	0.814287656	5.52150403	3.36E-08	2.67E-07	1.348955022	1.965443571	2.867346789	0	0.19337169
S100A16	1431.269065	4.49574974	0.83766804	5.366982532	8.01E-08	5.89E-07	374.8778908	166.039035	180.5472695	17.43561092	5.298384314
SERPINF1	922.2335363	4.493394168	0.637292336	7.050758201	1.78E-12	2.96E-11	43.26526473	105.478805	105.4227836	6.037261398	2.088414255
AMZ1	83.73607445	4.490867159	0.837505027	5.362197257	8.22E-08	6.03E-07	8.356940869	7.616093838	8.602040366	0	0.850835437
APOBEC3H	19.40841289	4.490201507	1.267918138	3.541397013	0.000398014	0.001286939	4.046865066	1.228402232	1.433673394	0.144894274	0.077348676
HLA-G	5805.101087	4.488711328	1.072332631	4.185931863	2.84E-05	0.000120718	0.263210736	50.07786432	40.23843327	0.579577094	2.59118065
VAV3	626.0838914	4.479387698	0.646549838	6.928139853	4.26E-12	6.62E-11	46.09478015	97.98555137	122.913599	5.699174759	3.055272706
TREM1	78.64687673	4.466122853	1.60803521	2.777378769	0.005479928	0.013265112	3.915259698	1.842603348	1.720408073	0.241490456	0
DHRS9	67.35157314	4.454833232	1.360255938	3.274996349	0.001056633	0.003074259	2.533403334	0.573254375	1.099149602	0.144894274	0
CCSER1	101.6395296	4.450746868	0.694718353	6.406548564	1.49E-10	1.77E-09	9.672994549	10.93277986	8.984353271	0.144894274	0.889509775
HAP1	68.43954836	4.447125177	0.659322022	6.744997176	1.53E-11	2.16E-10	4.44168117	9.458697186	15.38809443	0.434682821	0.580115071
KCNJ5	36.0642912	4.442796038	0.942225512	4.715215182	2.41E-06	1.31E-05	2.697910044	8.680709106	8.602040366	0.482980912	0.19337169
LBX2	11.87111344	4.432914705	1.39880666	3.169068915	0.001529281	0.004304276	1.908277836	2.006390312	0.286734679	0.144894274	0
SHOX2	28.43045982	4.430608632	1.13223104	3.913166551	9.11E-05	0.00034181	1.348955022	1.269348973	2.962925015	0	0.19337169
SLC39A4	512.1061004	4.429020728	1.068593565	4.144719634	3.40E-05	0.000141561	48.13466335	37.91668223	44.15714054	3.380866383	0.928184113
OVOL2	40.64676957	4.427585888	0.806877	5.487312052	4.08E-08	3.19E-07	2.79661407	1.760709866	1.529251621	0.096596182	0.116023014
KRT8P3	82.76362131	4.421520494	1.350438441	3.274137021	0.001059852	0.003081539	1.842475152	1.637869643	7.980781895	0.386384729	0
PP14571	221.3588392	4.418956096	1.511649909	2.923266869	0.003463795	0.008876583	15.33202537	8.025561249	16.86955694	1.20745228	0.116023014
CCDC68	32.40323157	4.418433726	1.523418142	2.90034207	0.003727556	0.009465812	2.171488572	2.006390312	4.444387522	0.289788547	0
AL590822.2	29.4035064	4.416364527	1.258343607	3.50966501	0.000448672	0.001431466	1.546363074	1.392189196	3.823129051	0.048298091	0.19337169
AC009275.1	45.60490017	4.411910923	0.929820041	4.744908399	2.09E-06	1.14E-05	3.915259698	7.69798732	9.748979081	0.048298091	0.734812423
ATP10B	10.29807686	4.405199778	1.622000297	2.715905654	0.006609475	0.015627595	0.625125498	1.596922902	1.051360489	0	0.116023014
SLC13A4	493.2312582	4.398532742	0.898156176	4.897291653	9.72E-07	5.71E-06	75.5085799	76.40661883	151.3003322	7.437906042	2.97792403
TMC1	60.70839687	4.389153751	1.005350319	4.365795354	1.27E-05	5.86E-05	1.677968442	3.84899366	3.34523792	0.048298091	0.270720366
FAM43A	253.9357599	4.388296193	0.929042182	4.723462808	2.32E-06	1.26E-05	12.83152338	8.353135177	17.49081541	1.304048462	0
ZDHHC8P1	134.5059014	4.383041009	0.554524048	7.904149561	2.70E-15	6.95E-14	11.18645628	8.967336293	8.649829479	0.531279003	0.502766395
ANXA9	249.471435	4.382433694	0.871391982	5.029233441	4.92E-07	3.09E-06	18.95117299	34.92757013	33.93027033	1.159154188	2.049739917
CXorf65	10.23001083	4.382117381	1.205886697	3.633937908	0.000279128	0.000932787	1.118645628	0.982721786	1.242516942	0	0.116023014
IL31RA	6.72905393	4.373894886	1.395393015	3.134525426	0.001721323	0.004786356	1.283152338	1.228402232	1.481462507	0.144894274	0
ACOT4	47.70090328	4.370021275	0.799406346	5.466583169	4.59E-08	3.54E-07	1.677968442	2.333964241	3.440816146	0.241490456	0.038674338
FLVCR2	1059.06892	4.362261971	0.543538001	8.025679833	1.01E-15	2.78E-14	126.1108439	102.8991603	98.44557307	5.071299574	6.922706512
UNQ6494	21.31412792	4.362129564	1.243745397	3.507252831	0.000452759	0.001442765	1.710869784	3.193845803	6.212584709	0	0.425417719
TIE1	23.77063588	4.361693767	1.203398518	3.624479922	0.000289544	0.000963665	9.640093207	2.538697946	0.238945566	0.144894274	0.309394704
MGAT4A	1770.605367	4.360983361	0.844444425	5.164322521	2.41E-07	1.62E-06	114.4966702	128.5318202	140.0221015	0.193192365	14.92829449
USH1C	29.56465499	4.358272339	1.253286254	3.477475576	0.000506159	0.001595699	2.928219438	1.801656607	3.775339938	0.193192365	0.116023014
AC083843.2	197.0840128	4.351918292	0.535288509	8.130042435	4.29E-16	1.24E-14	32.30911785	34.55904946	33.97805944	0.869365641	2.939249692
BHLHE41	72.65857293	4.347295391	1.046321842	4.154835745	3.26E-05	0.000136132	5.856438877	17.44331169	18.39880856	1.400644644	0.038674338
GALNT3	436.3638458	4.342774973	0.769970761	5.640181668	1.70E-08	1.43E-07	23.88637429	32.38887218	24.22908036	2.559798833	0.232046028
GPAT3	170.8599678	4.334704405	0.798752974	5.426839772	5.74E-08	4.33E-07	20.62914144	12.69348973	15.77040734	1.6421351	0.077348676
ADAP2	279.9258836	4.322555537	0.943159162	4.583060539	4.58E-06	2.34E-05	12.30510191	17.60709866	16.39166581	1.448942735	0.19337169
NPAS2	52.21982879	4.321994265	0.925093681	4.671953071	2.98E-06	1.58E-05	8.126631475	5.445916562	7.263945198	0.144894274	0.657463747
KRTCAP3	614.3099663	4.313665055	0.376513453	11.45686833	2.17E-30	4.01E-28	14.04887304	18.42603348	18.06428477	0.627875185	1.276253156
ATG9B	416.7411432	4.313558931	0.623679423	6.916307916	4.64E-12	7.15E-11	8.126631475	15.68260183	39.04370544	1.014259915	1.39227617
PRKCZ	3365.377045	4.309374326	0.658917956	6.540077241	6.15E-11	7.83E-10	92.41986969	102.3668527	213.5695466	2.801289289	13.53601832
LINC00346	38.28079165	4.306165327	1.121664902	3.839083598	0.000123494	0.000448446	4.902299958	5.896330713	3.966496391	0.531279003	0
PSD4	612.7579758	4.302487418	0.842197717	5.108642936	3.24E-07	2.11E-06	26.551383	21.08757165	34.64710703	2.608096924	0.348069043
RAC2	195.0914395	4.299959673	0.836485678	5.140506033	2.74E-07	1.81E-06	13.22633949	14.37230611	7.550679877	1.255750371	0
HERC2P3	52.5808203	4.29656472	1.29286844	3.323280688	0.000889653	0.002638912	1.217349654	2.825325134	2.867346789	0	0.270720366
KRT17	191.0410799	4.292820705	1.208809245	3.551280503	0.000383362	0.00124447	8.093730133	3.439526249	7.216156085	0.676173277	0
CDH3	2056.596953	4.291389989	0.484921746	8.849654661	8.78E-19	3.68E-17	71.26430678	70.30555441	48.84047363	5.650876668	1.276253156
HSPB8	3524.683419	4.287402778	1.244819629	3.444195993	0.00057276	0.001781304	122.1626829	194.660807	378.0596741	23.23138186	1.662996536
CR381653.1	37.58611074	4.282601029	1.359478071	3.150180293	0.001631697	0.004560345	2.533403334	3.111952321	2.198299205	0.289788547	0
LY6E	31127.46086	4.274300573	0.365005891	11.71022354	1.13E-31	2.38E-29	1660.859744	1602.573552	1407.150436	59.45495025	125.6529243
AL354707.1	51.95379325	4.259674963	0.78780631	5.407007926	6.41E-08	4.81E-07	4.046865066	2.620591428	2.58061211	0.048298091	0.309394704
ZBTB7C	24.13529469	4.254148243	1.07644177	3.95204679	7.75E-05	0.000296402	2.533403334	5.732543749	7.646258103	0	0.657463747
PADI4	21.45182186	4.253892753	1.6144517	2.634883876	0.008416607	0.019415044	4.013963724	1.187455491	0.525680245	0	0.232046028
C1orf115	559.9928251	4.25100796	0.973961278	4.364658076	1.27E-05	5.89E-05	25.13662529	26.36970125	35.79404574	0	3.712736453
UPK2	146.2013396	4.249202784	1.158221535	3.668730598	0.000243758	0.000826759	4.869398616	34.92757013	6.117006482	0.724471368	1.082881466
KANK4	245.429871	4.232593915	0.872129495	4.85317139	1.22E-06	6.98E-06	24.77471053	47.86674031	24.51581504	2.801289289	0.889509775
VTRNA1-3	24.85859847	4.229441497	0.918899224	4.602726158	4.17E-06	2.14E-05	1.019941602	1.965443571	1.577040734	0.193192365	0
ARRB1	1343.727625	4.22895021	0.67498833	6.265219743	3.72E-10	4.11E-09	246.760065	243.837843	232.9719266	20.62328493	6.96138085
TRIM14	172.3376055	4.224530557	0.692333908	6.101868629	1.05E-09	1.07E-08	4.77069459	11.30130053	6.260373822	0.096596182	0.812161099
TMEM154	1204.544158	4.217739992	0.896023646	4.707174873	2.51E-06	1.35E-05	81.20051206	133.4454291	92.28077748	10.86707052	0.541440733
F11R	5133.09934	4.205097398	0.609898422	6.894750419	5.40E-12	8.25E-11	185.1687528	266.4404441	224.3220971	3.380866383	25.75710915
DAO	27.17784907	4.192199085	1.053635379	3.978794912	6.93E-05	0.000268297	3.652048962	4.708875223	6.881632293	0.386384729	0.232046028
ATP6V1C2	233.2034827	4.187477422	0.470752876	8.895277407	5.83E-19	2.51E-17	27.30811386	45.12330865	33.4523792	2.270010286	2.049739917
CBR3-AS1	225.5082335	4.180687561	0.876027826	4.772322793	1.82E-06	1.01E-05	6.613169743	4.62698174	10.22687021	0.144894274	0.773486761
GDA	96.22732025	4.176065577	1.177815507	3.545602475	0.000391717	0.001268522	0.65802684	5.36402308	9.701189968	0.482980912	0.154697352
PRSS16	513.5076838	4.175751095	0.40451074	10.32296718	5.55E-25	5.89E-23	39.44870906	50.07786432	51.46887486	1.304048462	4.718269243
COBLL1	421.4333474	4.17555451	0.752782352	5.546828376	2.91E-08	2.34E-07	29.44670109	29.8092275	49.31836476	2.656395015	1.779019551
TPD52	1368.987198	4.173460221	0.925380824	4.509992119	6.48E-06	3.20E-05	105.2842944	106.1339528	98.87567509	0.096596182	13.84541302
MT1E	3688.320994	4.169821578	1.458609694	2.858764476	0.004252944	0.010629839	43.46267279	44.71384124	17.4430263	4.008741568	0
MVP	1476.726894	4.169263497	0.850296903	4.903303166	9.42E-07	5.55E-06	179.3452153	177.3403356	160.2368964	18.54646701	1.39227617
SGK1	3906.945221	4.164290624	0.92123689	4.52032552	6.17E-06	3.06E-05	235.8368195	327.9424492	720.6598262	47.670216	2.320460283
ALDH1L2	247.1354656	4.155302488	0.631585877	6.579156757	4.73E-11	6.15E-10	8.718855631	33.74011464	16.43945492	1.497240827	0.928184113
RN7SL381P	21.67707068	4.150373935	0.915904959	4.531446077	5.86E-06	2.93E-05	1.677968442	1.760709866	2.198299205	0	0.232046028
MPP7	248.4826727	4.147532727	0.381499682	10.87165448	1.57E-27	2.11E-25	48.03595932	35.5008245	46.11649418	3.2842702	2.127088593
IL1R1	406.997783	4.139796883	1.532322982	2.701647715	0.006899682	0.016233123	26.15656689	39.3907649	34.69489614	3.912145386	0
COL21A1	1793.254003	4.120345296	0.849869446	4.848209706	1.25E-06	7.14E-06	3.553344936	3.357632767	26.42737957	0.241490456	1.276253156
CAPG	5314.921843	4.115639805	0.754330164	5.456019127	4.87E-08	3.73E-07	195.3352675	206.6582022	168.1221	20.86477539	2.011065579
LGALS2	11.84038518	4.114175855	1.64782282	2.49673436	0.012534281	0.027638736	0.559322814	1.474082678	1.385884281	0.144894274	0
LINC00958	62.35924232	4.1107381	1.174330197	3.500495952	0.000464393	0.001476014	0.361914762	10.64615268	3.584183486	0.386384729	0.232046028
ANXA3	3452.25865	4.102968268	0.925525371	4.433123495	9.29E-06	4.41E-05	444.2997224	244.165417	182.6022013	33.85696192	0.928184113
NMI	595.2211867	4.089476758	0.938577224	4.357102062	1.32E-05	6.08E-05	23.75476893	26.1240208	20.02363841	2.608096924	0.270720366
LPAR3	31.50521104	4.082673691	0.902080899	4.525839861	6.02E-06	3.00E-05	1.085744286	4.62698174	2.198299205	0	0.348069043
VIPR1	18.48309554	4.079171578	1.058607413	3.85333744	0.000116519	0.000426157	0.526421472	1.064615268	1.194727829	0	0.116023014
MIR9-3HG	84.89292336	4.07079966	0.902423836	4.510962031	6.45E-06	3.19E-05	17.27320455	7.616093838	9.175509723	0.193192365	1.39227617
AC020890.1	15.98642077	4.063464186	1.008840607	4.0278555	5.63E-05	0.000222468	1.381856364	1.269348973	1.194727829	0.096596182	0.077348676
AL049555.1	86.24515676	4.061844009	0.835115661	4.863810128	1.15E-06	6.65E-06	7.468604635	7.738934061	6.260373822	0.917663732	0
HSD17B1	376.8897286	4.051527582	0.32596094	12.42948797	1.81E-35	6.20E-33	32.07880845	36.11502562	38.42244697	2.125116012	2.707203664
KRT15	73.3951377	4.047166696	1.303086384	3.105831467	0.001897448	0.005205458	6.646071085	2.129230535	1.385884281	0.434682821	0
GADD45G	194.261169	4.036354359	1.090959823	3.699819439	0.000215753	0.000741145	7.995026107	12.40686254	27.81326385	0.193192365	2.165762931
LAMA5	485.8105399	4.034469798	0.449634383	8.972778669	2.89E-19	1.29E-17	52.21442976	54.45916562	56.53452085	4.057039659	3.325993073
MISP	18.05326301	4.034420247	1.183400582	3.40917548	0.000651596	0.002002008	1.15154697	1.392189196	0.90799315	0	0.154697352
L1TD1	7494.34744	4.033914746	0.880815339	4.579750789	4.66E-06	2.37E-05	118.1816205	108.9183312	98.87567509	12.75069607	1.082881466
TULP1	20.55836691	4.023997925	1.198721381	3.356908443	0.000788192	0.002372778	0.460618788	1.187455491	2.102720978	0.096596182	0.077348676
AC104134.1	16.5318494	4.021973335	1.064610238	3.77788339	0.000158167	0.000560001	2.105685888	0.859881562	1.290306055	0	0.19337169
ISG20	331.2428877	4.017785619	0.585076423	6.867112503	6.55E-12	9.87E-11	9.179474419	7.452306874	7.024999632	0.289788547	0.812161099
CRISPLD2	1264.387991	4.011365063	0.694270718	5.777811099	7.57E-09	6.75E-08	88.57041267	65.71951941	73.11734311	8.935146869	0.928184113
TMEM54	174.1387021	4.007764538	0.838539229	4.779459803	1.76E-06	9.79E-06	17.33900724	19.61348897	14.76683596	0.048298091	2.513831974
MXRA8	917.6319671	4.007224882	0.745754611	5.373382644	7.73E-08	5.71E-07	53.4975821	67.31644231	72.40050641	6.423646127	2.204437269
TICAM1	67.4129263	4.003121013	0.817226538	4.898422683	9.66E-07	5.69E-06	0.98704026	4.504141517	7.741836329	0.386384729	0.232046028
NPNT	33.56277109	4.000740942	1.299067377	3.079702417	0.002072075	0.005631129	2.30309394	1.187455491	0.621258471	0	0.19337169
AP001972.5	293.0958742	4.000514933	0.579844629	6.899287726	5.23E-12	8.00E-11	34.84252118	64.49111718	74.07312537	4.008741568	4.099479834
AC078923.1	13.88578542	3.989160377	1.174279714	3.397112568	0.000681009	0.002082407	4.869398616	2.989112098	1.242516942	0.338086638	0.077348676
ATF3	1040.357182	3.98909711	0.676785215	5.894184774	3.77E-09	3.54E-08	42.11371776	78.61774285	118.6603679	7.631098407	3.325993073
MBNL3	787.2953522	3.977562295	0.851970265	4.668663286	3.03E-06	1.60E-05	81.36501877	142.4127654	139.6875777	8.98344496	8.16028533
HLA-DRB1	369.7515508	3.975167896	0.8236759	4.826131124	1.39E-06	7.89E-06	1.579264416	10.97372661	8.171938347	0.482980912	0.502766395
ALPK3	130.2945353	3.969222164	0.746693542	5.31573121	1.06E-07	7.65E-07	1.677968442	2.333964241	1.577040734	0.241490456	0.038674338
AC090907.1	23.8915309	3.968970156	1.147819197	3.457835666	0.000544533	0.00170319	1.48056039	1.474082678	2.485033883	0.144894274	0.116023014
F2RL1	1206.871405	3.963786379	0.624342236	6.348739766	2.17E-10	2.50E-09	206.258513	136.0250738	84.10883913	4.540020571	16.70731404
DRAM1	628.9081937	3.962032072	0.42055049	9.421061603	4.47E-21	2.55E-19	71.9881363	85.78342253	99.6403009	3.912145386	8.779074739
BICDL1	40.32134471	3.961772275	0.955144449	4.147825261	3.36E-05	0.000139971	1.513461732	1.392189196	0.669047584	0.096596182	0.077348676
STXBP2	1039.911173	3.957098814	0.55782806	7.093760777	1.31E-12	2.23E-11	71.13270141	75.54673727	76.27142458	8.741954504	1.39227617
DSC2	1773.774222	3.956522899	0.474033708	8.346501168	7.03E-17	2.26E-15	149.5036981	178.8144182	168.6477803	7.293011769	17.36477779
DOCK9	590.5534232	3.954213209	0.372731634	10.60874057	2.71E-26	3.26E-24	84.06292882	86.76614432	81.33707057	7.099819404	4.872966595
ATP8B1	112.6939319	3.940897558	0.717092376	5.49566233	3.89E-08	3.05E-07	13.45664888	13.79905174	8.649829479	0.193192365	1.624322198
LINC01405	213.3905156	3.926587106	1.18988699	3.299966417	0.000966964	0.002840818	1.80957381	1.678816384	0.430102018	0.193192365	0
COL28A1	36.73799209	3.924889782	1.049192879	3.740865822	0.000183387	0.000640857	0.526421472	3.111952321	2.43724477	0.144894274	0.154697352
RASGEF1C	19.57651064	3.918095993	1.35109789	2.899934951	0.003732401	0.009476483	0.098704026	1.637869643	4.922278654	0	0.348069043
AC092611.3	24.15342557	3.916416111	0.87905437	4.455260382	8.38E-06	4.02E-05	1.019941602	2.129230535	1.385884281	0.193192365	0.038674338
PIP5KL1	193.0426475	3.916089932	0.57373912	6.825558504	8.76E-12	1.29E-10	5.659030825	22.64354781	15.34030532	1.497240827	0.618789409
FAM83B	153.4565453	3.909995981	0.772149129	5.063783453	4.11E-07	2.61E-06	15.75974282	12.61159625	9.318877063	1.690433191	0.077348676
RASSF7	544.7091242	3.909430364	0.341555994	11.44594277	2.46E-30	4.49E-28	38.49457014	54.66389932	59.54523498	3.67065493	3.944782482
TNFAIP3	430.7863605	3.900644734	0.625164386	6.2393905	4.39E-10	4.77E-09	15.26622269	22.72544129	41.52873932	2.125116012	1.856368227
RPS6KA4	139.0458413	3.898899613	0.768851303	5.07107109	3.96E-07	2.53E-06	15.8255455	19.40875526	22.46088318	2.366606468	0.386743381
AC245297.1	111.4240995	3.898203465	0.929408871	4.19428261	2.74E-05	0.000116759	2.072784546	2.252070759	6.499319387	0.386384729	0.154697352
ARHGEF35	40.08302136	3.8967357	1.060230599	3.675366194	0.000237508	0.000808164	0.197408052	1.433135937	2.102720978	0.193192365	0
ADCK2	365.8359011	3.896465345	0.462697846	8.42118756	3.73E-17	1.25E-15	29.94022122	21.37419884	25.28044085	1.352346553	2.552506312
MAP3K8	545.4037988	3.894258977	0.58849478	6.617321185	3.66E-11	4.84E-10	66.82262561	61.25632463	75.74574433	4.926405301	5.337058652
IMPA2	1220.11965	3.882192795	0.293850397	13.21146008	7.53E-40	4.45E-37	124.1367634	152.7313442	193.5936973	8.258973592	16.16587331
PI4KAP2	150.9827537	3.879299152	0.55389722	7.003644387	2.49E-12	4.00E-11	11.25225897	16.87005732	15.48367266	0.917663732	1.314927494
SYK	208.1203233	3.878438508	0.807242742	4.804550485	1.55E-06	8.73E-06	1.612165758	12.69348973	14.28894483	0.965961824	0.464092057
OSR2	64.75373262	3.871934085	1.353851143	2.859940774	0.004237201	0.010599469	7.040887189	5.077395892	3.536394373	0	0.850835437
CNGB1	22.41839463	3.86435532	1.134460616	3.40633713	0.000658408	0.002019155	0.65802684	2.866271875	1.003571376	0	0.232046028
AMDHD2	135.9826388	3.859016738	0.614043303	6.28460032	3.29E-10	3.66E-09	7.402801951	19.40875526	16.91734605	1.304048462	0.928184113
LINC02163	19.24173282	3.858980204	0.914118679	4.221530852	2.43E-05	0.000104741	1.118645628	1.14650875	0.90799315	0	0.154697352
ABTB2	218.4217353	3.856933698	0.938886383	4.107987682	3.99E-05	0.00016327	13.65405693	16.9519508	28.0044203	2.221712194	0.696138085
STC2	1194.617232	3.85566267	0.890449747	4.330017141	1.49E-05	6.78E-05	79.35803691	208.9512197	140.8345164	19.75391929	0.696138085
ZNF600	1293.354414	3.855120316	0.466525278	8.263475733	1.41E-16	4.33E-15	38.72487954	55.52378088	84.92125406	3.332568292	6.149219751
TIMP4	454.9173139	3.853220968	1.555947172	2.476447169	0.013269726	0.029060641	40.3370453	10.64615268	11.56496538	2.801289289	0.19337169
TRIM47	26.01947454	3.844031074	0.890265669	4.317847143	1.58E-05	7.13E-05	1.250250996	2.70248491	1.338095168	0.241490456	0.038674338
IFI6	5788.92435	3.841894032	1.043235187	3.682672978	0.000230801	0.000787211	323.3214879	695.2347165	489.4083077	59.1651617	15.31503787
IL32	1008.02562	3.838305262	1.585240814	2.421275827	0.015466137	0.033253772	33.7567769	144.6238894	7.359523424	8.790252595	0
NTF4	61.89851182	3.83711802	0.835707796	4.591458927	4.40E-06	2.25E-05	2.039883204	2.620591428	3.058503241	0.289788547	0.116023014
CCDC144A	16.97227177	3.836717221	1.259894654	3.045268276	0.002324728	0.006237324	0.131605368	1.760709866	1.099149602	0	0.154697352
PROSER2-AS1	23.15008576	3.83474386	1.235985163	3.102580819	0.001918412	0.005259057	1.579264416	1.187455491	3.823129051	0.048298091	0.309394704
ZP3	48.07097776	3.833045377	1.070738214	3.579815615	0.000343837	0.001126075	0.32901342	1.55597616	3.966496391	0.193192365	0.116023014
DLG5	1672.928978	3.83030052	0.485317733	7.89235641	2.97E-15	7.60E-14	123.80775	216.48542	194.7406361	10.91536861	17.67417249
SOX7	32.33815271	3.828728304	0.883540185	4.333394644	1.47E-05	6.68E-05	4.60618788	5.200236115	4.444387522	0.434682821	0.309394704
RNF144B	201.8677501	3.826516543	0.682547455	5.606227837	2.07E-08	1.71E-07	15.95715087	13.02106366	16.53503315	1.883625556	0.425417719
CFAP45	50.64673824	3.824064347	0.821970343	4.65231426	3.28E-06	1.72E-05	3.750752988	4.053727365	3.249659694	0.386384729	0.19337169
KCNK5	259.4511571	3.821928841	0.593230085	6.442574202	1.17E-10	1.42E-09	23.6560649	45.40993584	34.5515288	0.869365641	4.872966595
HR	11.74870106	3.820676173	1.350182829	2.829747269	0.004658479	0.011499559	1.085744286	1.187455491	1.720408073	0.096596182	0.116023014
SLC6A4	366.7036668	3.805239748	0.883912709	4.304994949	1.67E-05	7.51E-05	1.250250996	2.456804464	2.962925015	0.048298091	0.309394704
FLNB-AS1	71.86488729	3.767478265	0.635469429	5.928653836	3.05E-09	2.91E-08	7.435703293	5.77349049	3.775339938	0.579577094	0.348069043
ANK1	220.0287846	3.766035334	0.887816476	4.24190746	2.22E-05	9.67E-05	30.36793867	17.97561933	28.76904611	3.863847295	0.077348676
BEAN1	115.9967398	3.765737449	0.758622464	4.963915027	6.91E-07	4.19E-06	5.001003984	10.97372661	10.37023755	1.062558006	0.348069043
CDC42BPG	147.6395455	3.762165782	0.618682946	6.080926926	1.19E-09	1.21E-08	7.896322081	7.28851991	10.70476134	0.338086638	1.121555804
GSTA3	401.5230071	3.758516504	1.037540616	3.622524694	0.000291742	0.000970105	4.27717446	1.351242455	5.256802446	0.579577094	0
ALOXE3	115.7638473	3.75638779	1.008908328	3.723220123	0.000196698	0.000682278	10.56133078	4.790768705	6.117006482	0.193192365	1.044207128
FOS	2962.281851	3.750401527	1.427969841	2.62638707	0.008629662	0.019859934	28.22935144	141.9214045	134.1440406	6.471944218	10.79014032
FAM71E1	213.0691794	3.745900281	0.715358727	5.236394186	1.64E-07	1.14E-06	1.579264416	8.557868883	6.642686727	0.434682821	0.502766395
C5AR1	89.75117423	3.745110507	0.794433676	4.714189014	2.43E-06	1.31E-05	1.052842944	2.70248491	2.723979449	0.048298091	0.309394704
AC138207.8	50.66951862	3.73102649	0.575972593	6.477784774	9.31E-11	1.14E-09	5.922241561	4.135620848	2.676190336	0.531279003	0.19337169
PLA2G10	34.56335451	3.720826585	0.950327224	3.915310948	9.03E-05	0.000339563	0.526421472	1.515029419	1.003571376	0.096596182	0.077348676
AL121944.1	273.9316278	3.71284788	0.444855672	8.346185325	7.05E-17	2.26E-15	14.31208377	16.17396272	18.82891058	1.20745228	1.624322198
FOSL1	262.5969181	3.700099881	0.703336755	5.260779923	1.43E-07	1.00E-06	33.49356616	17.44331169	33.69132477	2.366606468	2.513831974
FOSL2	554.4333376	3.697246864	0.849168228	4.353962785	1.34E-05	6.15E-05	11.61417373	20.35053031	19.54574728	2.46320265	0.348069043
AC044810.2	45.58034825	3.696241783	1.200923633	3.077832496	0.002085121	0.005660326	7.073788531	3.480472991	3.727550825	0.772769459	0
ITGA3	428.7178312	3.693422435	0.703170705	5.252526036	1.50E-07	1.05E-06	65.4078679	62.15715294	49.36615388	8.886848778	0.618789409
KRT18P16	79.71911431	3.688742349	0.833269691	4.4268289	9.56E-06	4.54E-05	6.678972427	3.808046919	4.25323107	0.82106755	0
ARHGDIB	6115.230005	3.686617907	0.899198437	4.099893587	4.13E-05	0.000168372	523.2300419	291.4179562	214.6686962	52.16193848	2.900575354
RGL3	368.2798999	3.684250193	0.316700308	11.63323841	2.79E-31	5.54E-29	12.00898983	12.93917018	13.52431902	0.965961824	1.276253156
LLGL2	242.2602114	3.682609394	0.615179622	5.986234363	2.15E-09	2.09E-08	16.94419113	17.19763125	12.7119041	0.193192365	2.668529326
DUSP27	33.76290157	3.682576533	1.168055301	3.152741594	0.001617449	0.004527385	1.875376494	1.105562009	1.194727829	0.241490456	0
PRKCH	351.720479	3.682433827	0.869930409	4.233021159	2.31E-05	0.000100055	35.86246278	42.91218464	47.9802696	6.423646127	0.464092057
CASP10	104.327992	3.681812235	0.745137114	4.941120453	7.77E-07	4.67E-06	4.737793248	5.404969821	4.157652843	0.772769459	0.038674338
ARFGEF3	249.0895342	3.677634814	0.444596043	8.271856827	1.32E-16	4.08E-15	18.22734347	15.72354857	11.75612183	0.627875185	2.088414255
WNT10B	98.34620965	3.670457563	1.188301823	3.088825996	0.002009491	0.005479214	2.039883204	2.170177276	0.860204037	0.289788547	0
ERVMER34-1	1908.965684	3.668163289	0.881903136	4.159372088	3.19E-05	0.000133798	66.78972427	143.0679133	127.9314559	17.72539946	0.657463747
HEY1	259.060782	3.668124644	0.752791672	4.87269557	1.10E-06	6.38E-06	18.88537031	11.6698212	12.61632587	1.255750371	1.276253156
PXDC1	779.8588499	3.663919551	0.5507154	6.65301815	2.87E-11	3.89E-10	31.51948564	50.03691758	77.51394152	6.52024231	2.59118065
JDP2	144.7892147	3.659880216	0.520929234	7.025676379	2.13E-12	3.47E-11	5.691932167	20.51431727	13.04642789	1.014259915	1.314927494
NFE2	108.3853651	3.65918562	0.668319271	5.475205903	4.37E-08	3.39E-07	4.11266775	2.497751205	3.106292354	0.386384729	0.19337169
AL035661.1	26.1892241	3.658683285	1.126802672	3.246960072	0.001166448	0.003363253	1.31605368	1.883550089	1.577040734	0.241490456	0.038674338
ARHGAP18	1352.30145	3.655162052	0.530885309	6.885031454	5.78E-12	8.77E-11	162.1707147	247.64589	276.7467542	26.2741616	13.34264663
EXPH5	618.4991445	3.650557039	0.664163142	5.496476402	3.87E-08	3.04E-07	66.0329934	66.16993356	37.13214091	1.6421351	8.933772091
LRP2	2215.747815	3.643323024	0.815570965	4.467205408	7.92E-06	3.83E-05	634.3707752	579.9286937	433.5428344	11.83303234	93.01178303
TFAP2A	1408.132695	3.643168003	0.918344993	3.96710172	7.28E-05	0.000279964	86.76083886	106.748154	128.7916599	0.676173277	20.2266788
MET	161.1806531	3.639922797	0.766110977	4.751169097	2.02E-06	1.11E-05	8.225335501	18.30319326	8.745407705	1.738731283	0.270720366
PALM3	255.928409	3.637265395	0.324549613	11.20711671	3.76E-29	5.84E-27	41.09377616	54.62295258	32.63996428	3.429164474	4.292851524
CDS1	427.5966994	3.635287576	0.603875575	6.019928159	1.74E-09	1.72E-08	48.49657811	56.99786356	60.59659547	8.258973592	1.160230142
LIPG	2133.719964	3.631474329	0.69320174	5.238697655	1.62E-07	1.12E-06	94.39395021	206.044001	205.0630845	5.699174759	26.49192157
TFEB	130.6436307	3.628932481	0.863669852	4.201758893	2.65E-05	0.000113494	25.301132	14.20851915	27.43095094	1.835327465	2.243111607
AC091940.1	41.37714345	3.628871376	0.959312024	3.78278525	0.000155083	0.000549759	1.217349654	1.310295714	1.099149602	0.144894274	0.077348676
FMNL1	83.08195666	3.628860073	0.605217739	5.995957882	2.02E-09	1.98E-08	2.434699308	3.439526249	3.010714128	0.144894274	0.386743381
AP001271.2	29.9006446	3.615145965	0.92979254	3.888121067	0.000101023	0.000374309	1.677968442	1.392189196	1.815986299	0.144894274	0.154697352
IL20RB	221.9338834	3.609566106	0.611648452	5.901373732	3.60E-09	3.40E-08	13.19343814	16.01017576	8.410883913	1.062558006	1.237578818
MIR22HG	936.5955352	3.608661414	0.806795737	4.472831536	7.72E-06	3.74E-05	73.10678193	95.20117298	136.86802	15.02070636	2.668529326
FAM78A	117.7300154	3.606099398	0.733453728	4.916601092	8.81E-07	5.22E-06	2.072784546	7.124732945	5.639115351	0.193192365	0.734812423
AP003390.1	20.29112022	3.602712061	0.922502311	3.905369142	9.41E-05	0.000350969	7.567308661	2.211124018	2.485033883	0.579577094	0.154697352
MYOF	1666.28431	3.600720729	1.041252597	3.458066506	0.000544067	0.001702113	251.3991542	166.4894492	213.0438664	35.25760656	0.541440733
PI4KAP1	126.0628636	3.598954837	0.538828882	6.67921664	2.40E-11	3.29E-10	20.79364815	11.6698212	10.1790811	1.062558006	1.58564786
CORO2A	1256.90976	3.596271367	0.473038136	7.602497757	2.90E-14	6.43E-13	62.94026725	98.96827315	86.30713834	9.659618236	5.298384314
HSD17B1P1	21.63334838	3.594646231	1.007360066	3.568382699	0.000359192	0.001170904	1.31605368	1.351242455	1.385884281	0.096596182	0.154697352
HPCAL1	275.2795317	3.587965526	0.532921594	6.732633034	1.67E-11	2.35E-10	40.36994664	22.35692062	30.9195562	1.931923647	4.022131158
CSGALNACT1	975.2062325	3.5861901	0.658663231	5.444648999	5.19E-08	3.96E-07	17.93123139	19.20402156	22.74761786	1.159154188	2.668529326
EFEMP1	2570.330585	3.586117703	1.281698911	2.797940821	0.005142953	0.012560691	166.1846785	65.26910526	220.3078116	25.93607496	0.077348676
NEAT1	16729.62597	3.584938908	1.010590681	3.547369848	0.000389098	0.001261149	876.0969349	1054.378582	1489.443289	152.6219681	51.86228733
IFFO2	118.3207395	3.58423469	0.607279937	5.902112799	3.59E-09	3.39E-08	18.45765286	19.32686178	22.03078116	2.173414103	1.508299184
TCIRG1	414.8444303	3.584153226	0.817550307	4.384015508	1.17E-05	5.43E-05	30.00602391	21.5379858	27.43095094	4.395126298	0.19337169
NCOA3	3334.739101	3.58349016	0.463336202	7.734103532	1.04E-14	2.46E-13	228.3353135	314.4709714	485.2506549	18.16008228	48.61364294
IL2RB	774.994625	3.57996014	0.963905338	3.714016304	0.000203996	0.00070486	6.678972427	2.620591428	12.7119041	1.304048462	0
AC020916.1	1103.085024	3.568338657	0.886247281	4.026346521	5.67E-05	0.0002236	58.99210621	65.80141289	68.67295559	8.935146869	2.707203664
MMP14	561.9828135	3.563258617	0.863600295	4.12605072	3.69E-05	0.000152262	26.551383	36.15597236	38.99591632	5.650876668	0.348069043
PPP1R13L	273.0319775	3.561858991	0.564001714	6.315333629	2.70E-10	3.05E-09	21.05685888	19.28591504	22.41309406	2.608096924	1.276253156
PRSS12	171.6056238	3.561395795	0.74662266	4.770007641	1.84E-06	1.02E-05	13.25924083	35.9921854	14.33673394	1.014259915	3.132621383
PIEZO1	294.1866824	3.555939501	0.642590091	5.533760251	3.13E-08	2.51E-07	22.99803806	31.69277758	27.43095094	4.250232024	0.696138085
DSP	5410.811036	3.555733775	0.631609278	5.629641453	1.81E-08	1.51E-07	215.2405794	425.1909592	382.3606943	52.0170442	9.204492458
FANCE	890.4276662	3.554033853	0.396849369	8.955624305	3.38E-19	1.48E-17	31.68399235	111.0475618	80.76360121	7.003223221	7.193426879
CLN3	173.0938635	3.551692102	0.351676944	10.09930323	5.56E-24	4.74E-22	16.87838845	19.73632919	25.99727755	1.593837009	2.436483298
AC092490.1	55.16371813	3.545221147	0.987998641	3.588285448	0.00033286	0.001093523	2.171488572	0.36852067	3.010714128	0.241490456	0.116023014
IL21R	25.78140745	3.544428545	1.254210904	2.826022747	0.004712992	0.011624119	0.296112078	5.486863303	1.051360489	0.096596182	0.348069043
B4GALT1	5096.576957	3.543685701	0.43892069	8.073635588	6.82E-16	1.92E-14	418.8998864	340.4312052	368.310695	43.75807061	26.83999061
PRPH2	34.08512961	3.538672178	0.861591649	4.107133791	4.01E-05	0.000163769	10.46262676	4.62698174	1.146938715	0.531279003	0.502766395
CR381670.1	27.15056582	3.538180134	1.435727036	2.464382188	0.013724968	0.029959783	1.447659048	2.170177276	3.488605259	0.434682821	0
TMEM191A	47.72926549	3.536669759	0.685818186	5.156862026	2.51E-07	1.67E-06	4.211371776	2.415857723	2.771768562	0.531279003	0.077348676
DPPA2	455.9484141	3.535944516	0.881900678	4.009458893	6.09E-05	0.000238803	9.278178445	9.827217856	7.216156085	1.110856097	0.541440733
SYNPO	142.6225141	3.534041357	0.898351735	3.933917217	8.36E-05	0.000317007	8.653052947	14.57703982	26.42737957	2.46320265	0.618789409
SYTL3	54.69945319	3.52755484	0.714178098	4.93932095	7.84E-07	4.71E-06	6.185452297	3.030058839	3.154081467	0.193192365	0.618789409
EPHX3	81.21932722	3.523937041	0.811390014	4.34308653	1.40E-05	6.42E-05	1.414757706	1.883550089	1.194727829	0.096596182	0.19337169
LNX1	540.6836093	3.521382673	0.411993542	8.547179304	1.26E-17	4.48E-16	10.85744286	19.77727593	13.094217	1.593837009	1.237578818
MICAL2	321.3162262	3.518641771	0.813522344	4.325193765	1.52E-05	6.91E-05	56.95222301	28.33514482	30.82397798	6.085559489	1.044207128
SLC13A3	219.10174	3.517984948	0.544538627	6.460487417	1.04E-10	1.27E-09	28.45966083	26.00118058	16.24829847	1.352346553	3.364667411
NR5A2	73.46398453	3.517616394	1.045598422	3.364213564	0.000767621	0.002317932	0.855434892	1.678816384	1.051360489	0	0.232046028
CYP2S1	2259.581274	3.515697178	0.926204354	3.795811542	0.000147161	0.000524195	109.9891863	90.00093686	42.48452158	14.15134072	0.386743381
FGFR4	585.5279643	3.513516483	0.447168831	7.857248187	3.93E-15	9.89E-14	51.58930426	49.50460995	66.71360195	2.414904559	9.049795105
IL2RG	12.18933436	3.509503715	1.387286262	2.529761744	0.011414	0.025427945	0.098704026	1.474082678	1.242516942	0.144894274	0.038674338
DIRC2	382.8685056	3.496301127	0.424188441	8.242330035	1.69E-16	5.14E-15	20.46463473	35.00946361	43.67924941	2.608096924	4.060805496
PLEKHA6	1159.934644	3.490518507	1.534105435	2.275279408	0.022889174	0.046548156	167.7310415	127.4672049	191.777711	23.61776659	7.348124231
ABLIM3	93.84536757	3.486492969	0.914915638	3.810726176	0.000138559	0.000497276	8.291138185	15.51881486	13.8110537	0.193192365	2.475157636
HNRNPA1P22	44.74920889	3.484006878	0.597160844	5.834285543	5.40E-09	4.93E-08	3.12562749	3.930887142	3.631972599	0.289788547	0.425417719
ADAMTS20	645.7361274	3.481320507	1.071185934	3.249968467	0.001154178	0.003335046	17.27320455	1.842603348	5.113435106	0.096596182	1.624322198
GSE1	1437.21795	3.480980563	0.457605991	7.606938357	2.81E-14	6.23E-13	85.64219323	171.3211646	163.0086649	7.679396498	21.50293196
LINC00884	35.4484366	3.478849483	0.776871026	4.478027069	7.53E-06	3.66E-05	1.908277836	4.545088258	3.154081467	0.482980912	0.154697352
GAB2	1301.557859	3.473102826	0.722938315	4.804148231	1.55E-06	8.75E-06	91.3341254	96.9209361	142.7938701	2.414904559	21.46425762
AC026362.2	65.26736961	3.465846434	0.727010443	4.767258115	1.87E-06	1.03E-05	3.158528832	2.538697946	3.775339938	0.144894274	0.502766395
SH3D21	139.7180176	3.464503715	0.459377192	7.541740812	4.64E-14	9.94E-13	8.093730133	10.15479178	6.833843179	1.110856097	0.580115071
GAS6	133.5900001	3.464421372	0.635880262	5.448229139	5.09E-08	3.89E-07	15.95715087	16.82911058	21.12278801	0.579577094	3.248644397
CRYAB	1322.642076	3.45538339	0.943359622	3.662848516	0.000249426	0.000843657	3.61914762	4.667928481	10.70476134	1.159154188	0.077348676
ADAMTS1	1218.9226	3.453640073	0.481008323	7.180000657	6.97E-13	1.26E-11	90.41288782	59.8231887	103.3678517	6.761732766	10.86748899
AC062028.1	8.569555984	3.452623489	1.322224782	2.611222794	0.00902191	0.020633895	0.230309394	1.269348973	1.194727829	0.144894274	0.038674338
SLC6A6	1305.554619	3.452079658	0.342606439	10.07593339	7.06E-24	5.88E-22	90.44578917	80.09182552	124.2994833	7.727694589	12.8012059
AC092343.1	10.21680172	3.45112775	1.085567855	3.179099062	0.001477336	0.004171032	0.526421472	1.719763125	2.43724477	0.241490456	0.077348676
CCIN	58.13548709	3.445959798	1.292121188	2.666901395	0.007655413	0.017809518	11.71287775	8.189348213	4.301020183	1.497240827	0.038674338
ITGA2	360.2784825	3.443714067	0.653635748	5.268552213	1.38E-07	9.66E-07	106.1397293	35.95123866	40.90748085	4.250232024	8.585703049
RGS10	629.4642311	3.438938798	0.363320348	9.465307454	2.93E-21	1.71E-19	81.99014427	91.22933909	39.6171748	6.568540401	8.082936654
C1QL3	19.83004845	3.438193645	0.853538461	4.028164873	5.62E-05	0.000222235	0.98704026	1.842603348	2.246088318	0	0.348069043
SERPINB9	7705.298978	3.421567016	1.021062862	3.350985668	0.000805245	0.002416561	230.0461833	295.5945238	407.4977678	56.02578577	4.718269243
GFY	23.1436889	3.418856744	1.160307092	2.946510254	0.003213818	0.008317254	0.394816104	1.596922902	1.051360489	0.096596182	0.116023014
AC108215.1	16.11434973	3.416999392	1.394312079	2.450670437	0.014259044	0.030956141	1.48056039	0.491360893	1.242516942	0	0.232046028
CEACAM1	405.5227597	3.415791744	1.134009098	3.012137865	0.002594148	0.006875167	3.191430174	10.27763201	6.308162935	1.255750371	0.038674338
SVOPL	27.12598894	3.411323388	1.050022765	3.24880898	0.001158893	0.003344084	1.875376494	1.433135937	1.099149602	0.193192365	0.116023014
MICALL2	107.527137	3.40988967	0.655853897	5.199160493	2.00E-07	1.36E-06	8.060828791	7.616093838	8.793196818	1.255750371	0.425417719
AC011379.2	26.19771163	3.408863231	0.876244104	3.890312318	0.000100115	0.000371224	3.355936884	1.228402232	1.67261896	0.096596182	0.348069043
LINC01198	27.71099989	3.404564779	1.465565256	2.323038681	0.020177075	0.041847912	0.361914762	3.685206696	1.194727829	0	0.386743381
SLC9A1	1224.287379	3.40275481	0.42816896	7.947224416	1.91E-15	5.04E-14	93.47271263	156.1299237	115.1239736	15.98666818	9.127143781
RASGRF1	42.86461395	3.394981604	1.479251337	2.295067456	0.021729259	0.044557816	9.936205285	5.650650267	3.584183486	1.255750371	0
HERC3	445.7845142	3.393130028	0.386933221	8.769291034	1.80E-18	7.07E-17	54.97814249	46.51549785	41.38537198	3.574058747	6.76800916
LIPH	683.3323445	3.390135472	1.08314546	3.129898611	0.001748666	0.00485324	76.95623894	51.38816004	58.92397651	12.17111898	0.116023014
SPIRE2	265.3602705	3.382963821	0.579632867	5.83639061	5.33E-09	4.87E-08	15.00301195	29.39976008	44.30050788	1.497240827	5.143686962
FAM160A1	134.2429309	3.38050251	0.515606787	6.556357661	5.51E-11	7.07E-10	5.132609352	8.84449607	6.929421406	1.062558006	0.425417719
AC004233.3	35.37926556	3.379724905	0.656354185	5.149239519	2.62E-07	1.74E-06	1.513461732	2.211124018	1.051360489	0.193192365	0.154697352
INSIG1	1419.573932	3.379015513	0.340038032	9.937169364	2.87E-23	2.23E-21	129.104866	196.0529962	186.9032215	16.421351	20.61342218
CDC42EP1	344.1651101	3.373240316	0.874786718	3.856071712	0.000115224	0.000422153	22.20840585	37.34342785	53.52380672	7.099819404	0.541440733
PKP2	2128.654977	3.369327884	0.415747682	8.104261381	5.31E-16	1.53E-14	214.2535391	144.4601025	153.3552641	18.59476511	18.25428756
TDRP	438.4715557	3.367828795	0.535583534	6.288148501	3.21E-10	3.59E-09	33.00004603	56.01514178	66.23571082	4.540020571	6.884032174
SLC35D2	258.5422259	3.367612033	0.497649569	6.767034961	1.31E-11	1.88E-10	21.81358975	21.45609232	15.96156379	1.835327465	2.475157636
C4orf26	95.94888327	3.362670413	1.150828295	2.921956671	0.003478399	0.008902047	6.053846929	1.719763125	1.529251621	0.048298091	0.657463747
CAPN14	16.21464724	3.362357808	0.801826125	4.193375225	2.75E-05	0.00011716	1.941179178	2.047337053	2.102720978	0.289788547	0.154697352
RASGRP2	443.4166477	3.36072288	0.83578971	4.021014903	5.79E-05	0.000228295	19.14858105	51.42910678	29.24693724	5.795770942	1.044207128
LINC00664	64.10717899	3.358198919	1.392259912	2.41204885	0.015863156	0.033993465	1.941179178	1.105562009	0.90799315	0.241490456	0.038674338
KRT18	30998.42592	3.353570827	1.305948492	2.567919676	0.010231086	0.023035166	2543.471145	1773.280515	1640.791411	398.4592523	0.541440733
RPS6KA5	172.8965581	3.353132312	0.403387669	8.312431363	9.38E-17	2.97E-15	14.47659048	14.37230611	17.15629162	0.627875185	2.823226678
ANO1	47.92946391	3.350412586	0.979192435	3.421607916	0.00062252	0.001921477	3.388838226	1.842603348	1.242516942	0.241490456	0.232046028
FUT4	69.29676865	3.346522397	0.544223551	6.149168648	7.79E-10	8.17E-09	9.080770393	16.01017576	8.936564158	1.883625556	0.541440733
CASQ1	128.777885	3.345023886	1.113500797	3.004060611	0.002664022	0.00703382	2.46760065	7.083786204	8.649829479	1.255750371	0
EGLN3	848.2463957	3.34453212	0.653144401	5.120662621	3.04E-07	1.99E-06	39.25130101	106.5434203	122.6268643	14.19963881	4.795617919
ABCC3	72.73461264	3.342421066	0.667748594	5.005508202	5.57E-07	3.46E-06	2.171488572	3.357632767	2.962925015	0.434682821	0.19337169
DEF6	81.99103395	3.340065083	0.558676542	5.978531103	2.25E-09	2.19E-08	3.388838226	9.253963481	8.124149234	0.724471368	0.812161099
SQSTM1	2993.240712	3.326540733	0.567391737	5.862864258	4.55E-09	4.21E-08	111.6671548	224.5928747	322.3853573	27.04693106	21.69630365
RNF19B	237.6590731	3.325862809	0.550235772	6.044432183	1.50E-09	1.50E-08	20.00401594	31.89751129	20.93163156	1.448942735	4.138154172
RHOBTB1	878.1309308	3.324062919	0.815884609	4.074182649	4.62E-05	0.000186042	77.5484631	55.60567437	94.192342	9.611320145	7.154752541
AC025857.2	21.1970911	3.323354791	0.810954787	4.098076545	4.17E-05	0.000169652	0.888336234	1.064615268	1.433673394	0.096596182	0.154697352
CARD14	43.94728039	3.315987944	0.512754336	6.467011027	1.00E-10	1.22E-09	3.553344936	3.439526249	3.154081467	0.338086638	0.425417719
LINC02321	14.12945701	3.309418354	1.010250598	3.275839046	0.001053486	0.003066916	1.80957381	0.655147857	1.481462507	0.144894274	0.154697352
ABCC2	123.3191549	3.308134768	0.708492156	4.669260964	3.02E-06	1.60E-05	20.03691728	11.42414076	17.01292428	2.608096924	0.928184113
BHLHE40-AS1	14.49255832	3.307898183	0.974663379	3.393887833	0.000689079	0.002103595	2.204389914	2.129230535	2.246088318	0.482980912	0
LDHD	206.8158305	3.306570887	1.084394185	3.049233326	0.002294262	0.006160063	3.191430174	11.09656683	4.301020183	1.304048462	0
LINC01176	17.06088644	3.304617552	0.908158373	3.638811964	0.000273899	0.000917806	0.98704026	1.55597616	1.194727829	0.048298091	0.232046028
AVPI1	758.3240309	3.302002437	0.348101532	9.48574519	2.41E-21	1.43E-19	52.8724566	58.75857343	75.79353344	7.969185045	6.110545413
SMAGP	608.2090486	3.299475739	0.427157604	7.724258471	1.13E-14	2.65E-13	58.13667132	89.46862923	64.61088097	8.693656413	7.232101217
AC008753.1	136.6933424	3.298070789	0.462824127	7.125969885	1.03E-12	1.79E-11	17.0757965	9.745324374	13.52431902	0.531279003	2.629854988
AC046168.1	15.62369253	3.297455711	0.887830765	3.714058851	0.000203961	0.00070486	1.710869784	2.784378392	1.242516942	0.241490456	0.19337169
EPHA1-AS1	52.01772681	3.29628557	1.399158537	2.355905698	0.018477608	0.038729738	2.63210736	2.579644687	0	0.338086638	0.038674338
PPP1R3B	1285.622946	3.292744723	0.494096647	6.664171359	2.66E-11	3.62E-10	39.11969564	41.97040959	43.96598409	6.230453762	3.055272706
KRT8	46337.22866	3.290885633	1.259529456	2.612789734	0.008980654	0.02055547	4246.707818	3116.98877	2450.338987	684.6254425	1.082881466
GRM4	147.7239463	3.28362219	1.118815187	2.934910276	0.003336441	0.0085924	0.263210736	4.667928481	4.157652843	0.627875185	0.038674338
EPHB4	939.6886998	3.282208972	0.334332417	9.817202301	9.49E-23	6.80E-21	83.7339154	137.9905174	151.3481213	17.38731283	10.75146598
SLC9A7	208.3234343	3.279941185	0.564211116	5.813322517	6.12E-09	5.54E-08	26.71588971	30.62816232	19.21122348	1.6421351	4.408874538
TMEM52	58.38956287	3.275330218	0.589809414	5.553200982	2.80E-08	2.27E-07	2.994022122	2.088283794	3.823129051	0.144894274	0.541440733
ALOX5	504.8327509	3.271261859	0.987557799	3.312476356	0.000924739	0.002733642	28.03194339	57.98058535	57.72924868	0.241490456	11.83434745
ZNRF2	39.56157968	3.269520781	0.779656882	4.193538022	2.75E-05	0.00011711	1.381856364	3.562366473	2.293877431	0.289788547	0.270720366
AC016831.1	24.65215825	3.267610554	0.752444636	4.342659112	1.41E-05	6.43E-05	4.244273118	1.883550089	4.301020183	0.096596182	0.734812423
LAMA2	126.7861713	3.266750011	0.903022411	3.617573574	0.000297378	0.000986623	21.81358975	7.69798732	12.95084966	2.559798833	0.580115071
NRK	217.7864416	3.265299344	1.180061151	2.767059437	0.005656444	0.013649849	16.48357234	10.85088638	14.33673394	2.994481653	0
FLNB	5887.942356	3.254311541	0.481980246	6.751960409	1.46E-11	2.07E-10	505.6936266	472.6891789	353.2093352	64.47795173	36.81796983
NFE2L3	350.8868681	3.248934223	0.601875365	5.398018277	6.74E-08	5.04E-07	30.99306417	80.58318642	61.69574507	9.707916328	3.364667411
RAB11FIP1	412.7216696	3.247460679	0.505362681	6.42600018	1.31E-10	1.57E-09	33.72387555	52.86224272	52.99812648	7.872588863	2.707203664
FSTL3	4067.377271	3.245758959	0.768914324	4.221223171	2.43E-05	0.000104853	4.44168117	29.03123942	37.89676672	2.656395015	3.016598368
TLE2	235.2873655	3.242033819	0.94834795	3.418612144	0.000629414	0.00194032	5.231313378	12.12023536	14.09778838	2.318308377	0
SLC9A2	9.044432519	3.239843195	1.212636055	2.671735829	0.007546003	0.017585488	0.460618788	1.842603348	1.194727829	0.048298091	0.232046028
CAV1	2088.605337	3.236752879	0.861574292	3.756789064	0.000172107	0.000604877	258.3413374	342.1509683	351.3933489	59.79303688	11.37025539
RAB7B	69.17363993	3.236172274	1.147948859	2.81909098	0.004815987	0.01184646	19.7408052	4.790768705	3.536394373	1.352346553	0.812161099
QSOX1	4093.573723	3.229074232	0.558461532	5.782088912	7.38E-09	6.60E-08	91.39992808	95.44685342	137.2025438	15.93837009	9.35918981
AL451069.3	10.48922525	3.223568916	0.856031237	3.765714119	0.000166074	0.000585065	1.743771126	1.433135937	1.146938715	0.193192365	0.154697352
ITGBL1	24.43297345	3.211734125	1.332392355	2.410501767	0.015930594	0.034113472	0.690928182	1.228402232	1.624829847	0.241490456	0.038674338
VWDE	142.9737226	3.202850282	0.557467692	5.745355878	9.17E-09	8.07E-08	3.388838226	4.872662187	3.966496391	0.338086638	0.657463747
TNFRSF1B	1054.539361	3.201680807	1.057141023	3.028622234	0.002456717	0.006548581	77.35105505	73.41750673	154.3588355	17.29071664	6.690660484
FBXO25	497.7665065	3.199396983	0.413749166	7.73269711	1.05E-14	2.49E-13	36.94820707	43.85395968	53.38043938	3.380866383	7.850890626
ZBTB7B	124.4298514	3.195860876	0.645134528	4.953789849	7.28E-07	4.40E-06	8.883362341	9.049229775	12.52074764	1.352346553	1.121555804
OLFML1	146.874136	3.193459469	0.593468949	5.381005147	7.41E-08	5.51E-07	22.47161659	19.90011616	8.3630948	3.042779744	0.928184113
DLL4	43.124793	3.188025934	0.892758978	3.570981657	0.000355646	0.001161141	1.842475152	2.252070759	1.911564526	0	0.502766395
ZNF726	92.94916594	3.182347441	1.151626127	2.763351201	0.005721117	0.013790126	8.653052947	11.58792772	9.987924647	2.270010286	0.038674338
PROSER2	59.88503216	3.181470865	0.669880285	4.749312577	2.04E-06	1.12E-05	8.784658315	9.294910222	6.738264953	0.338086638	1.779019551
SLC16A5	572.982042	3.179520799	0.68877622	4.616188399	3.91E-06	2.02E-05	13.88436633	11.34224728	10.32244844	2.608096924	0.154697352
AL391650.1	12.13962625	3.179084793	0.956273601	3.324451066	0.000885928	0.002629976	0.394816104	1.801656607	2.102720978	0.048298091	0.309394704
AL161431.1	42.66143834	3.178986094	1.115175625	2.850659593	0.004362865	0.010871425	11.64707507	7.28851991	2.628401223	1.6421351	0
LIN28B	4355.753433	3.172531679	0.361017378	8.787753357	1.53E-18	6.10E-17	449.5310358	373.5980655	379.302191	52.78981366	45.90643927
PLA2G16	3240.641606	3.172184626	0.832713685	3.80945418	0.000139274	0.000499234	239.4230658	251.6177238	251.0840005	6.616838492	59.17173723
NDRG1	319.0587881	3.168360916	0.782431554	4.049377736	5.14E-05	0.000205055	3.684950304	12.65254299	7.550679877	1.110856097	0.850835437
B4GALNT3	58.65385621	3.162809302	0.990528932	3.193050904	0.001407781	0.003991238	4.836497274	5.691597008	1.720408073	0.096596182	0.966858451
FER1L4	120.8520576	3.160987784	0.573066812	5.515914933	3.47E-08	2.75E-07	8.587250263	14.16757241	11.94727829	1.738731283	1.121555804
CCDC168	14.91078508	3.159745392	0.710003711	4.450322362	8.57E-06	4.10E-05	1.842475152	1.719763125	2.532822997	0.241490456	0.270720366
RAB11FIP4	843.0243069	3.158041005	0.549761793	5.744380648	9.23E-09	8.12E-08	109.0021461	131.6847193	122.913599	3.477462565	28.9670792
AKR1B1	34061.70449	3.152232427	0.364793979	8.641130631	5.57E-18	2.07E-16	2299.178681	3678.327643	5487.480495	350.112863	640.6017356
ZYG11A	375.7298893	3.15202863	0.689711175	4.570070405	4.88E-06	2.47E-05	16.94419113	9.868164597	17.25186984	1.110856097	2.707203664
SGPP1	297.6253576	3.149614075	0.585747522	5.377084763	7.57E-08	5.61E-07	24.44569711	42.01135633	29.96377394	3.960443477	4.138154172
SLC22A5	135.2510199	3.141954423	0.463106663	6.784515697	1.16E-11	1.68E-10	13.65405693	12.89822344	13.61989725	2.366606468	0.966858451
AC114488.2	12.74384725	3.132838385	0.910945433	3.439106526	0.000583638	0.001811695	0.98704026	1.310295714	1.768197186	0.193192365	0.154697352
ATP7B	554.2912051	3.129835361	0.402972126	7.766878058	8.04E-15	1.94E-13	71.09980007	96.30673499	64.94540476	9.901108692	9.823281866
PTER	678.3324168	3.124911748	0.419980597	7.440609807	1.00E-13	2.02E-12	56.42580154	54.50011236	55.19642568	3.380866383	11.40892973
RAPGEF1	501.8516123	3.124784094	0.434897251	7.185108868	6.72E-13	1.22E-11	26.97910044	47.78484682	52.80697002	5.409386212	5.530430342
AC102945.2	23.11012371	3.122276324	1.040212208	3.001576313	0.002685857	0.007087665	1.250250996	0.491360893	1.385884281	0.193192365	0.077348676
HID1	641.4941145	3.121852627	0.834427415	3.741311193	0.000183063	0.000639874	39.21839967	45.77845651	50.41751437	0.193192365	12.41446252
AC009318.1	20.59664813	3.120788292	0.951403321	3.28019487	0.001037354	0.003028319	2.500501992	1.842603348	3.010714128	0.144894274	0.502766395
SREBF1	187.7422055	3.118551906	0.482949279	6.457307304	1.07E-10	1.30E-09	9.837501259	16.54248339	15.29251621	0.724471368	2.97792403
TGM2	10262.20515	3.110641044	1.339049522	2.323021661	0.020177989	0.041847912	609.1354458	304.3161796	692.4164603	127.7001531	0.502766395
ITGB3	81.10161419	3.109167343	0.977493583	3.180754735	0.001468919	0.004148629	2.862416754	1.433135937	4.25323107	0.676173277	0.038674338
TTC7B	447.0999514	3.106684056	0.369120127	8.416458017	3.88E-17	1.30E-15	44.48261439	48.03052727	63.08162935	4.588318662	9.243166796
SLC2A14	165.1363662	3.10548944	1.038094134	2.991529707	0.002775835	0.007298997	1.217349654	1.801656607	9.844557307	0.144894274	1.044207128
LMO4	1951.55492	3.105196385	0.391186931	7.937883758	2.06E-15	5.41E-14	117.3590869	268.1602072	219.7821313	16.32475482	37.86217696
SPR	44.94289927	3.101347765	0.597583079	5.18981858	2.10E-07	1.42E-06	4.145569092	2.006390312	3.440816146	0.338086638	0.502766395
AL442663.4	23.59206488	3.100502119	0.788781987	3.930746608	8.47E-05	0.000320525	1.941179178	0.573254375	1.338095168	0.144894274	0.19337169
BCL9L	211.9031129	3.097445369	0.402215271	7.700964121	1.35E-14	3.13E-13	15.36492672	13.14390388	19.16343437	2.366606468	1.779019551
SGK3	46.38821241	3.091462442	0.579718637	5.332694596	9.68E-08	7.01E-07	3.94816104	3.234792544	2.485033883	0.386384729	0.464092057
C4orf19	227.7235359	3.085277512	0.888468587	3.472579176	0.000515483	0.001621628	4.573286538	3.767100178	14.33673394	1.448942735	0.502766395
ZSCAN12P1	173.8172003	3.081468401	0.539230879	5.714562208	1.10E-08	9.52E-08	3.224331516	5.77349049	5.830271803	0.579577094	0.734812423
PTK2B	1526.669306	3.080132641	0.616795629	4.993765351	5.92E-07	3.64E-06	40.86346677	52.82129597	45.63860305	4.636616753	7.889564964
SERPINE1	9002.45468	3.077210082	1.303202799	2.361267245	0.018212601	0.038288502	465.0604692	352.5104938	520.2322857	108.7190033	0.348069043
SMAD7	164.1014287	3.07419356	0.710605586	4.326160138	1.52E-05	6.88E-05	9.080770393	12.32496906	12.95084966	2.752991197	0.116023014
TRABD2A	818.2598217	3.071815101	0.905049817	3.394083997	0.000688586	0.002102959	154.20859	146.7940667	109.1981235	1.159154188	38.210246
LINC00475	101.4814541	3.059384204	0.654781326	4.672375468	2.98E-06	1.58E-05	5.988044245	1.596922902	6.929421406	0.724471368	0.580115071
SLC7A11	1036.857897	3.054455239	0.846626225	3.607796627	0.000308808	0.001021789	36.68499633	225.9031705	137.3937003	30.28290317	3.248644397
NCK2	391.9496443	3.050827982	0.43951013	6.941428128	3.88E-12	6.05E-11	37.40882586	72.47573169	65.32771767	8.114079319	7.618844597
CAPS	135.3634726	3.049655771	0.397527326	7.671562612	1.70E-14	3.86E-13	9.574290523	19.85916942	19.92806018	2.46320265	1.972391241
ADIRF-AS1	23.16573669	3.049072661	0.606582711	5.026639578	4.99E-07	3.12E-06	1.842475152	2.497751205	2.723979449	0.531279003	0.116023014
CARD10	96.65142297	3.045135328	0.703665367	4.32753333	1.51E-05	6.84E-05	13.7856623	8.394081918	7.024999632	2.270010286	0.232046028
ERN1	207.8882235	3.041295412	0.490291308	6.203037589	5.54E-10	5.95E-09	10.33102139	19.44970201	21.79183559	1.883625556	2.861901016
DUX4L50	10.99975989	3.038781407	1.170533235	2.596065892	0.009429798	0.021437171	0.131605368	1.637869643	2.054931865	0.193192365	0.154697352
CBX7	51.99161984	3.03514711	0.610427046	4.972170109	6.62E-07	4.04E-06	1.31605368	2.70248491	1.529251621	0.193192365	0.309394704
SH3BP5	66.12171934	3.023780047	0.601784995	5.024685016	5.04E-07	3.15E-06	3.553344936	4.708875223	4.826700427	0.917663732	0.270720366
PPARD	962.2617803	3.022083087	0.384260525	7.864672243	3.70E-15	9.33E-14	55.27425456	134.6328846	118.0868986	15.64858154	12.37578818
TYMP	67.81006886	3.021430003	0.643505614	4.695265959	2.66E-06	1.43E-05	1.908277836	3.398579508	2.771768562	0.434682821	0.309394704
PLIN5	71.36020391	3.0201412	0.99741537	3.027967375	0.002462047	0.006559234	2.270192598	5.814437231	1.911564526	0	0.966858451
ATP13A3	947.107986	3.016015583	0.322879466	9.340995317	9.54E-21	5.21E-19	69.05991686	86.8480378	107.5255046	9.659618236	15.08299184
LINC00857	41.7071407	3.015771647	1.080407448	2.791328079	0.005249224	0.01278215	6.448663033	2.825325134	3.010714128	1.062558006	0
EZR	25812.04414	3.014908873	0.532065819	5.66642089	1.46E-08	1.24E-07	1591.832729	1782.657319	1605.666412	184.2089198	282.7480855
NR1H3	611.6600937	3.013549409	0.295772163	10.18875265	2.23E-24	2.05E-22	76.36401479	77.18460691	76.70152659	12.6058018	8.35365702
SLC41A2	382.3897358	3.011074372	0.442414552	6.806002107	1.00E-11	1.46E-10	30.59824806	29.39976008	23.89455657	1.545538918	6.535963132
CTH	1445.531985	3.002571346	0.429411561	6.992292753	2.70E-12	4.32E-11	59.58433037	133.1997487	116.4142796	13.33027317	15.62443257
ITPR3	361.9337735	3.001477878	0.768353382	3.90637687	9.37E-05	0.000349686	6.349959007	23.58532285	25.66275376	4.395126298	0.502766395
HTATIP2	818.7669378	2.999694827	0.757285984	3.961112301	7.46E-05	0.000286558	63.79570214	54.00875147	43.77482764	12.55750371	1.546973522
MARVELD3	199.9061056	2.998861781	0.834732681	3.592601381	0.000327393	0.001076763	16.91128979	16.13301598	14.09778838	3.912145386	0.19337169
RASA1	1032.862397	2.997074797	0.397842466	7.533320475	4.95E-14	1.05E-12	70.47467457	128.3680332	119.1860482	11.4949457	18.7957283
SP100	439.5203344	2.990367168	0.738604076	4.048674065	5.15E-05	0.000205616	11.38386433	9.581537409	10.13129199	2.125116012	0.696138085
ANKRD24	126.3640418	2.987892206	0.815147907	3.665460197	0.000246894	0.000836052	1.184448312	1.719763125	1.099149602	0.144894274	0.232046028
MXD1	589.2854184	2.983656695	0.727664554	4.10031886	4.13E-05	0.000168109	25.43273737	36.23786584	77.32278507	1.931923647	12.10506781
ACER2	148.7552633	2.979036793	0.421423288	7.068989481	1.56E-12	2.64E-11	11.35096299	6.633372053	10.75255046	0.869365641	1.895042565
MST1R	47.19402706	2.97799603	0.652424519	4.564506614	5.01E-06	2.53E-05	1.381856364	2.374910982	1.338095168	0.048298091	0.425417719
JADE2	833.0268376	2.977870771	0.862599607	3.452205109	0.000556025	0.001734008	33.42776348	16.70627035	24.85033883	5.844069033	0.850835437
DGKD	552.0181665	2.977122415	0.35418601	8.405533622	4.26E-17	1.42E-15	97.45377501	108.8364378	83.10526776	7.582800316	20.76811954
CCSAP	701.3471229	2.972312695	0.588873505	5.047455302	4.48E-07	2.83E-06	29.47960243	48.93135557	62.60373822	6.713434674	6.729334822
NANOS1	26.17116829	2.971244475	0.944027046	3.147414564	0.001647212	0.004600222	5.494524114	1.596922902	1.624829847	0.579577094	0.232046028
TENM3	1361.835806	2.968187719	0.372847197	7.960869064	1.71E-15	4.57E-14	152.6622269	206.6172554	170.7027121	25.25990169	25.13831974
HSD11B2	422.6169933	2.966111628	0.955706433	3.10358027	0.001911944	0.005243274	7.435703293	7.001892722	44.7306099	0.241490456	5.955848061
METTL7A	482.5168337	2.9648055	0.634042088	4.676038947	2.92E-06	1.55E-05	81.95724293	38.16236267	90.8948932	16.03496627	3.132621383
MAPK13	196.6592936	2.955943773	0.74661826	3.95910994	7.52E-05	0.00028867	3.224331516	6.469585088	4.157652843	0.917663732	0.386743381
AC010325.1	64.19734811	2.953341484	0.679631435	4.345504535	1.39E-05	6.36E-05	1.381856364	1.92449683	4.157652843	0.338086638	0.386743381
OSBPL10	406.0243049	2.95155981	0.599107165	4.926597413	8.37E-07	4.99E-06	21.81358975	20.26863683	17.29965896	3.187674018	2.475157636
PDGFA	2641.49224	2.947539534	1.266044418	2.328148595	0.019904215	0.041355694	65.57237461	161.1254261	104.8493142	29.41353753	0.038674338
AQP3	678.1870521	2.945948558	0.705999658	4.172733687	3.01E-05	0.000126834	27.70292997	48.52188816	42.77125626	4.201933933	7.580170259
TRIB3	1547.1229	2.944198375	0.59263356	4.967991305	6.76E-07	4.12E-06	30.03892525	70.7969153	87.2629206	9.128339233	9.165818119
PHYH	2032.693864	2.940378136	0.369725364	7.952871023	1.82E-15	4.84E-14	230.4409994	221.071455	181.9331537	24.68032459	37.74615394
AL390719.1	76.16754968	2.94006693	0.538451943	5.460221606	4.76E-08	3.65E-07	4.342977144	10.11384504	3.440816146	0.627875185	1.121555804
TCAF2	51.42511832	2.939799192	1.103235829	2.664706054	0.007705564	0.017912068	6.547367059	7.411360133	6.260373822	1.593837009	0.270720366
SIN3B	441.5191754	2.938967258	0.427421959	6.876032443	6.15E-12	9.31E-11	33.32905945	39.3907649	46.73775265	5.264491939	6.458614455
PROCR	1139.48912	2.936919511	0.958156605	3.06517692	0.002175413	0.005878395	55.70197201	58.63573321	37.27550825	13.42686935	0.154697352
SLC38A3	623.8380993	2.935537582	1.075637062	2.729115317	0.006350449	0.015119337	59.78173842	15.02745397	24.32465859	0.869365641	9.475212824
SMTNL2	39.41411855	2.933110127	0.714344653	4.106015371	4.03E-05	0.000164473	1.381856364	4.831715446	1.911564526	0.144894274	0.657463747
ASNS	51.13166529	2.932298099	0.832580326	3.521940175	0.000428401	0.00137375	0.855434892	6.305798124	3.870918165	0.676173277	0.386743381
PHLDA3	514.5948981	2.929969533	0.71862514	4.077187632	4.56E-05	0.000183855	33.98708629	18.34414	46.64217443	4.10533775	5.76247637
CRYBG2	1144.218408	2.927954672	0.822789556	3.558570537	0.000372879	0.001212621	139.6990981	118.131348	127.3579865	33.80866383	1.121555804
ANKRD37	58.19680958	2.923052238	0.84421966	3.462430901	0.000535319	0.001678661	1.97408052	1.801656607	1.242516942	0.338086638	0.154697352
ECM1	3822.172231	2.921467408	0.896826803	3.257560322	0.001123744	0.003254754	258.0781267	182.9090923	449.1220853	77.66333062	4.215502848
MICALL1	832.0303925	2.919876608	0.448197255	6.514713273	7.28E-11	9.09E-10	80.01606375	83.12188436	93.37992708	15.50368727	9.281841134
ELOVL7	64.37999167	2.919839834	0.681991273	4.281344862	1.86E-05	8.24E-05	1.052842944	1.637869643	2.102720978	0	0.464092057
CCDC28A	813.8459649	2.915340545	0.422850442	6.894495686	5.41E-12	8.26E-11	33.29615811	45.12330865	37.94455584	8.645358322	2.39780896
ARHGAP45	201.4035244	2.913911932	0.498325652	5.847405041	4.99E-09	4.58E-08	12.7657207	14.04473219	16.96513517	1.352346553	3.093947045
SNHG26	162.3722703	2.912919344	0.837470781	3.478233999	0.000504729	0.001591871	9.903303943	3.398579508	7.407312537	1.352346553	0.657463747
NABP1	2418.414873	2.911565474	0.677310296	4.298717283	1.72E-05	7.69E-05	346.8130461	209.2787936	307.9530451	51.53406329	32.48644397
OCLN	518.4698684	2.911100527	0.603496623	4.823722979	1.41E-06	7.97E-06	28.22935144	31.07857647	25.8061211	0.82106755	8.16028533
SLC12A9	216.7625611	2.909167946	0.367581226	7.914354004	2.49E-15	6.44E-14	25.95915884	34.19052879	25.56717553	4.588318662	3.867433806
CRTC3	412.1152492	2.908458734	0.551983083	5.269108464	1.37E-07	9.64E-07	26.88039642	45.49182932	47.40680024	3.042779744	9.35918981
NET1	2124.751564	2.907775243	0.502650394	5.784886032	7.26E-09	6.50E-08	156.807796	310.9086049	255.6717553	35.35420275	36.54724946
IRAK2	226.7736743	2.89986779	0.451177932	6.42732631	1.30E-10	1.56E-09	16.28616429	20.02295638	11.2782307	1.448942735	3.403341749
CFL1P5	15.56320114	2.894364466	1.080298481	2.679226637	0.007379243	0.017226796	1.085744286	1.596922902	1.529251621	0.338086638	0.077348676
EFHD1	344.5489957	2.89403802	0.622544169	4.648727217	3.34E-06	1.75E-05	34.01998763	48.60378164	43.20135828	4.395126298	8.547028711
PAX8	39.89151396	2.893348396	1.251040601	2.312753395	0.020736202	0.042813031	6.152550955	3.971833883	2.819557675	1.20745228	0
UBALD2	208.2623778	2.89263653	0.545487664	5.302844999	1.14E-07	8.15E-07	4.342977144	4.586034999	8.219727461	1.062558006	0.657463747
TACC2	1292.182349	2.890856742	0.345315536	8.371638218	5.68E-17	1.85E-15	87.28726033	181.5578499	173.4744807	20.91307348	23.82339224
TNK1	65.4501932	2.884299731	0.745504898	3.868921236	0.000109318	0.000402113	3.849457014	1.105562009	3.488605259	0.579577094	0.270720366
ARID3A	3044.549026	2.876611793	0.424558834	6.775531586	1.24E-11	1.78E-10	185.6622729	268.3239942	266.949986	51.00278429	19.56921506
MFSD12	586.5012365	2.873730904	0.568732029	5.052873338	4.35E-07	2.75E-06	40.56735469	43.89490642	76.98826127	9.418127781	6.884032174
GUCY1B2	18.4639112	2.87030384	1.127761354	2.545134066	0.010923579	0.024459931	0.592224156	1.801656607	1.624829847	0	0.425417719
TBC1D2	176.9708693	2.868664928	0.556313935	5.15655774	2.52E-07	1.68E-06	13.65405693	19.2449683	15.00578153	3.429164474	1.314927494
CD2AP	722.3252035	2.867717997	0.44271962	6.477503746	9.33E-11	1.14E-09	77.44975907	70.51028811	57.92040513	14.48942735	5.801150709
GPC1	522.9353735	2.867665728	0.433521491	6.614817914	3.72E-11	4.91E-10	47.44373517	47.82579356	45.35186837	7.727694589	6.535963132
AC083964.1	31.99809522	2.864769811	0.561575126	5.101311788	3.37E-07	2.19E-06	5.066806668	3.767100178	5.830271803	0.627875185	0.889509775
CBR1	2247.329588	2.861310015	0.516476491	5.540058582	3.02E-08	2.43E-07	385.669531	282.3687264	251.8964154	69.40435703	20.53607351
MIR193BHG	129.8697882	2.861228231	0.468275668	6.110136456	9.95E-10	1.02E-08	8.587250263	13.88094522	11.75612183	1.738731283	1.779019551
TBXA2R	13.0050811	2.860713284	0.840966759	3.401696026	0.000669691	0.002051197	2.039883204	2.333964241	0.716836697	0.289788547	0.232046028
CAV2	377.21431	2.857769058	0.748947891	3.815711472	0.000135791	0.000488888	58.202474	46.965912	43.24914739	12.36431134	2.011065579
PHLDA2	90.91634266	2.855260204	0.887712573	3.216424204	0.001297988	0.003706313	3.520443594	11.26035379	11.51717627	2.366606468	0.19337169
ERMP1	295.3696287	2.854093486	0.508660353	5.611000488	2.01E-08	1.67E-07	34.151593	37.05680066	31.01513443	4.298530115	6.381265779
PIK3CB	954.2834368	2.852547604	0.354880571	8.038049529	9.13E-16	2.53E-14	49.31911166	64.65490414	61.02669748	10.72217624	7.077403864
FAT2	309.866713	2.851132011	0.712820979	3.999786897	6.34E-05	0.000247619	3.652048962	4.790768705	4.539965749	0.579577094	0.773486761
RCAN3	314.172591	2.840065504	0.363640089	7.810100119	5.71E-15	1.40E-13	12.17349654	18.09845955	14.14557749	3.235972109	1.314927494
SLC7A8	8364.402028	2.83923085	0.793420428	3.578469559	0.000345612	0.001131387	1005.399209	891.8200204	1313.627142	295.4877219	15.77912993
UPK1B	64.51498983	2.838527326	1.118867907	2.536963754	0.011181853	0.024981384	6.053846929	1.637869643	1.194727829	0.869365641	0
SPON2	285.0009463	2.837366019	0.747248545	3.797084699	0.000146408	0.000521637	1.217349654	5.036449151	2.485033883	0.193192365	0.734812423
SERINC2	2373.088402	2.835033493	0.346033649	8.192941649	2.55E-16	7.54E-15	228.861735	138.522825	204.7285607	31.29716309	28.27094112
GNA12	996.4775188	2.83427917	0.391860287	7.232881875	4.73E-13	8.79E-12	91.43282943	179.79714	156.6049238	21.54094867	23.32062585
OPHN1	580.0335275	2.831266135	0.647379196	4.373427744	1.22E-05	5.68E-05	28.29515412	43.03502486	48.26700427	2.46320265	10.75146598
ALDH4A1	728.0351852	2.828161647	0.30336321	9.322691602	1.13E-20	6.15E-19	109.956285	70.30555441	62.98605112	11.01196479	14.7349228
ENG	986.9583105	2.825490518	0.941015663	3.002596694	0.002676869	0.007066475	19.31308776	41.76567589	89.17448512	14.39283117	0.386743381
AC083843.3	13.89138908	2.823848303	0.945970585	2.985133308	0.002834548	0.007434829	0.921237576	4.21751433	2.771768562	0.338086638	0.502766395
PPM1B	803.0741281	2.821356138	0.418452057	6.742364123	1.56E-11	2.20E-10	57.51154582	53.92685798	90.99047142	10.52898388	10.94483767
ITSN2	458.987202	2.819880801	0.361826865	7.79345338	6.52E-15	1.59E-13	23.16254477	32.34792544	32.59217516	4.298530115	5.066338285
TSPAN9	540.4509609	2.816843677	0.342022967	8.235831942	1.78E-16	5.37E-15	39.81062382	33.33064723	43.91819498	7.34130986	4.911640933
MBP	94.52049436	2.813031854	0.572683884	4.912015041	9.01E-07	5.34E-06	4.902299958	3.767100178	4.205441957	0.676173277	0.696138085
SLC2A3	11560.56663	2.811689238	0.553534431	5.079520049	3.78E-07	2.43E-06	720.934206	527.6806521	775.1394152	124.2226905	87.82942173
FMN1	106.8064526	2.811243186	0.847204089	3.318259701	0.000905802	0.002681422	9.936205285	8.885442811	15.48367266	3.139375927	0.309394704
S100A10	6768.485018	2.807397912	0.75276013	3.729472112	0.000191881	0.000667535	766.2722552	640.2022966	665.224455	171.1201371	37.78482828
MGAT3-AS1	81.45144393	2.806765521	0.569600938	4.927599891	8.32E-07	4.96E-06	6.975084505	7.452306874	6.164795595	0.724471368	1.508299184
TCP11L2	72.17876691	2.801025345	0.650033849	4.309045368	1.64E-05	7.39E-05	3.520443594	1.92449683	3.488605259	0.386384729	0.580115071
RPS10P7	89.51154215	2.799713286	0.623080848	4.493338696	7.01E-06	3.44E-05	1.513461732	2.948165357	3.297448807	0.676173277	0.154697352
AC092139.4	102.2970536	2.799545852	0.578874819	4.836185237	1.32E-06	7.54E-06	11.15355494	6.346744865	5.01785688	0.965961824	1.469624846
PHLDB3	150.6873874	2.796904957	0.528272482	5.294436207	1.19E-07	8.51E-07	15.72684148	19.44970201	19.2590126	2.704693106	3.171295721
XKR8	174.9757996	2.796760987	0.405186007	6.902412562	5.11E-12	7.84E-11	10.98904823	16.9519508	14.48010128	3.187674018	1.276253156
MAP7	494.6230889	2.79492683	0.783393381	3.567718208	0.000360103	0.001173618	23.22834745	25.4279262	28.09999853	0.193192365	8.740400401
GRAMD2B	1042.043913	2.791237058	0.878307469	3.177972584	0.001483088	0.004185439	46.0618788	47.12969897	72.49608464	16.22815864	0.348069043
TNIP2	498.5998312	2.786204992	0.444440766	6.269013117	3.63E-10	4.01E-09	30.17053062	41.80662263	51.22992929	7.727694589	5.453081666
ASB2	97.98540304	2.781391531	0.65676091	4.235013822	2.29E-05	9.93E-05	2.368896624	3.767100178	6.738264953	0.531279003	0.889509775
PACSIN3	420.6548627	2.779993214	0.403469218	6.890223807	5.57E-12	8.46E-11	37.50752988	25.26413924	33.4523792	4.057039659	6.57463747
USP32P3	15.91694792	2.774630471	0.783460751	3.541505389	0.000397851	0.001286692	1.6450671	1.965443571	1.146938715	0.096596182	0.425417719
ELMO3	292.8264971	2.77217188	0.598978593	4.628165199	3.69E-06	1.92E-05	12.83152338	9.745324374	12.3773803	1.448942735	2.436483298
MYLIP	486.5163952	2.771330341	0.801001792	3.459830388	0.000540516	0.001692798	8.949165025	21.70177276	33.35680097	5.988963307	0.618789409
RHBDF2	228.5843447	2.770637463	0.482880493	5.737729111	9.60E-09	8.42E-08	21.78068841	21.94745321	18.25544122	5.119597665	1.39227617
IFNLR1	189.6570411	2.768563407	0.746031906	3.711052279	0.000206399	0.000712665	1.579264416	2.456804464	4.10986373	0.869365641	0
C12orf75	819.6124589	2.765292789	0.656139108	4.214491647	2.50E-05	0.000107778	56.49160422	35.5008245	19.78469284	7.486204133	4.447548877
ATP2B4	2818.086097	2.762401356	0.59888204	4.612596758	3.98E-06	2.05E-05	316.8399235	241.2991451	539.1567745	39.94252141	85.1608924
AC092070.2	143.6662783	2.761720169	0.561311486	4.920120537	8.65E-07	5.14E-06	6.876380479	6.305798124	5.686904464	0.289788547	1.856368227
SNX8	1598.886312	2.761526959	0.398678936	6.926693921	4.31E-12	6.68E-11	112.3251816	134.0186835	152.2561145	27.19182534	15.74045559
BAIAP2L1	418.3802208	2.761522381	0.527380628	5.236298475	1.64E-07	1.14E-06	18.16154079	28.99029267	28.62567877	6.13385758	1.895042565
HAS3	182.3228772	2.758271171	0.857670879	3.216001894	0.0012999	0.003711053	14.83850524	2.415857723	1.338095168	1.062558006	0.966858451
KRT8P39	73.74435249	2.757494328	0.84806351	3.25151866	0.001147902	0.003318862	9.771698575	1.310295714	4.157652843	0.627875185	1.082881466
APOC1	1006.178279	2.756687715	0.535394831	5.148887432	2.62E-07	1.74E-06	32.86844066	32.34792544	24.80254972	7.679396498	1.779019551
ARHGAP30	44.90031145	2.753737574	0.807941023	3.408339835	0.000653594	0.002006478	4.211371776	2.538697946	3.297448807	0.289788547	0.850835437
ESR2	23.56206815	2.749124767	0.753353775	3.649181644	0.000263077	0.000884759	2.763712728	2.497751205	2.054931865	0.096596182	0.734812423
TNFRSF21	605.6237731	2.749059553	0.42160603	6.520446475	7.01E-11	8.79E-10	86.20151605	66.33372053	75.93690078	16.37305291	8.314982682
RNPEPL1	114.8630098	2.740767384	0.647903807	4.230207251	2.33E-05	0.000101196	8.291138185	7.943667767	11.03928514	0.724471368	2.436483298
NR2F6	523.041728	2.737254597	0.427587159	6.401629568	1.54E-10	1.82E-09	35.07283058	40.25064647	60.07091522	8.645358322	6.381265779
SLC7A6	450.1872454	2.73663489	0.30217768	9.05637666	1.35E-19	6.38E-18	71.42881349	50.40543825	76.94047216	8.838550686	13.80673869
TPK1	164.2626189	2.731197085	0.522872958	5.223442982	1.76E-07	1.21E-06	37.21141781	13.10295714	12.95084966	3.960443477	3.055272706
ATAD3B	224.9948285	2.728395764	0.464734259	5.870872896	4.34E-09	4.03E-08	18.81956763	13.59431803	21.17057712	2.656395015	3.442016087
ADAM15	1109.956724	2.727314644	0.524258672	5.202230859	1.97E-07	1.34E-06	101.105824	121.9393949	172.2319638	21.73414103	23.01123114
ADGRF5	42.25053696	2.722778814	1.17862315	2.31013519	0.020880671	0.043058889	3.092726148	6.346744865	0.669047584	0.82106755	0.270720366
HEXB	650.6097722	2.719410184	0.645401537	4.213516748	2.51E-05	0.000108212	44.21940365	58.39005276	56.67788819	14.10304263	3.016598368
ACHE	58.24955705	2.718063066	0.632394778	4.298047931	1.72E-05	7.71E-05	12.43670728	9.909111338	5.92585003	1.980221738	1.160230142
STARD13-AS	10.67661114	2.71768193	0.872381823	3.115243646	0.00183793	0.005066671	1.348955022	1.269348973	0.860204037	0.241490456	0.154697352
SHTN1	1642.23475	2.716997982	0.432320606	6.28468304	3.29E-10	3.66E-09	196.2894064	260.5850601	159.0421685	39.89422332	28.69635884
ADPRH	118.7172696	2.715961931	0.71102471	3.819785576	0.000133568	0.000481588	2.862416754	1.719763125	1.911564526	0.579577094	0.154697352
GCNT1	827.6183578	2.715129394	0.551127345	4.926500962	8.37E-07	4.99E-06	15.16751866	17.15668451	14.67125773	1.448942735	4.060805496
COMTD1	52.96997735	2.71163914	0.790484763	3.430349664	0.000602804	0.001866087	2.566304676	2.129230535	2.293877431	0.193192365	0.618789409
LGALS1	11620.71025	2.709654456	0.822400441	3.294811531	0.000984877	0.002891141	1956.609908	1518.387052	1210.498236	456.3686636	39.75721952
LGALS3	2475.510003	2.704826249	0.961500228	2.813131157	0.004906164	0.012040176	228.7630309	220.8257746	128.5527144	59.45495025	1.314927494
SCIN	352.1603154	2.704347662	0.676058761	4.000166579	6.33E-05	0.000247456	1.184448312	3.562366473	3.631972599	0.386384729	0.580115071
AL451139.1	31.89203968	2.703824214	0.839452984	3.220935854	0.001277727	0.003654826	3.553344936	2.907218616	3.918707278	1.062558006	0.077348676
TAF4B	112.3993531	2.702388357	0.505952147	5.341193571	9.23E-08	6.71E-07	3.224331516	4.586034999	4.683333088	0.289788547	1.160230142
AC091045.1	28.09575531	2.698967502	1.09939185	2.454964081	0.014089867	0.030638451	1.447659048	1.269348973	0.860204037	0.289788547	0.116023014
SNX10	214.5620613	2.698492933	0.547113939	4.932232106	8.13E-07	4.86E-06	5.198412036	12.81632995	6.499319387	0.579577094	2.320460283
HDAC5	501.4302027	2.697009758	0.488667309	5.519112304	3.41E-08	2.70E-07	8.718855631	22.27502714	29.72482837	4.10533775	2.823226678
GSAP	14.85643454	2.694513153	1.074050071	2.508740725	0.012116238	0.026817128	2.006981862	0.122840223	1.194727829	0.193192365	0.19337169
EHD3	304.7645499	2.69447239	0.311427191	8.652013915	5.06E-18	1.89E-16	33.82257958	26.28780776	37.13214091	4.733212936	6.613311808
RAB11FIP5	586.8008092	2.692992588	0.591692788	4.55133583	5.33E-06	2.68E-05	27.63712728	41.64283566	47.40680024	5.988963307	7.618844597
HERPUD1	3750.682666	2.688159499	0.384060279	6.99931664	2.57E-12	4.12E-11	191.0909944	318.3609118	273.2103598	47.96000454	42.00033113
RIN3	54.32851316	2.686566698	0.793198857	3.387002736	0.000706607	0.002150872	7.929223423	8.189348213	6.547108501	2.318308377	0.154697352
TAP1	739.5001603	2.685837738	0.653468338	4.110126815	3.95E-05	0.000161885	22.6361233	14.61798656	25.18486263	0.965961824	6.729334822
B3GALNT1P1	47.78954806	2.678214225	0.650096892	4.119715472	3.79E-05	0.000156073	5.297116062	4.381301294	4.826700427	0.772769459	0.928184113
PLS1	1058.099571	2.67229946	0.503670093	5.305654432	1.12E-07	8.04E-07	132.2633949	216.1987928	127.4057756	18.40157274	38.71301239
ZFAT	185.833626	2.671226389	0.641659655	4.162995707	3.14E-05	0.000131879	3.684950304	22.97112174	12.42516942	2.414904559	2.127088593
TAB3	289.9775928	2.669911733	0.435138839	6.135769765	8.47E-10	8.82E-09	24.050881	24.7318316	25.04149529	3.815549203	4.911640933
MIR210HG	174.3690296	2.669342377	0.723501373	3.689477967	0.000224715	0.000767996	7.468604635	18.50792696	13.76326459	0.531279003	4.408874538
C5orf66	11.5896409	2.667105505	1.115275174	2.391432686	0.016782761	0.035687445	0.855434892	1.14650875	2.293877431	0.096596182	0.425417719
SLC3A2	26749.21936	2.660581125	0.466097041	5.708212869	1.14E-08	9.86E-08	1198.957804	1604.047634	1973.83374	390.7315577	153.3050761
AC133552.2	70.64704548	2.659871212	0.493349389	5.391455371	6.99E-08	5.22E-07	9.014967709	6.223904642	7.59846899	1.20745228	1.508299184
ACSL1	381.482728	2.658119116	0.497846195	5.339237579	9.33E-08	6.77E-07	60.40686392	51.83857419	45.01734458	9.514723963	8.972446429
KSR1	432.8818888	2.657841787	0.475434655	5.590340872	2.27E-08	1.86E-07	33.06584871	49.13608928	44.58724256	6.182155671	9.011120767
GEMIN8P4	145.0160855	2.652190847	0.451347052	5.876167431	4.20E-09	3.92E-08	24.9063159	19.28591504	10.22687021	2.366606468	4.17682851
FAM198B	92.17583757	2.647453713	1.009504687	2.62252741	0.008728025	0.020051896	26.65008702	6.182957901	6.69047584	2.221712194	2.475157636
YPEL3	193.9250778	2.644605091	0.509624006	5.189325973	2.11E-07	1.43E-06	6.086748271	9.131123258	6.212584709	1.738731283	0.773486761
AC097478.1	139.1560422	2.643114779	0.943613456	2.801056686	0.005093557	0.012452418	10.75873883	5.691597008	8.840985931	2.511500741	0.348069043
CTSZ	107.0977091	2.642017556	0.715942421	3.690265414	0.00022402	0.000765978	3.882358356	3.152899062	3.488605259	0.676173277	0.580115071
PRKCZ-AS1	39.32686372	2.634264228	0.624965425	4.215055943	2.50E-05	0.00010754	1.97408052	2.825325134	4.635543975	0.193192365	0.966858451
EDEM1	1459.179624	2.633538824	0.380136151	6.92788312	4.27E-12	6.63E-11	125.5515211	146.3436526	143.1283939	27.19182534	22.23774438
INF2	306.1898905	2.633175399	0.58418093	4.507465523	6.56E-06	3.23E-05	25.13662529	26.45159473	29.86819571	6.278751854	3.287318735
NATD1	294.4118167	2.628482769	0.604898566	4.345328153	1.39E-05	6.37E-05	11.91028581	21.37419884	23.94234568	0.772769459	6.57463747
VGLL3	1328.484895	2.627520512	0.593339996	4.428355627	9.50E-06	4.51E-05	10.13361334	18.26224652	34.12142678	4.540020571	2.939249692
AHNAK	2208.778948	2.62717636	0.946329525	2.77617499	0.00550026	0.013309961	196.7829265	252.231925	176.7719295	66.07178874	3.867433806
LMO2	62.34485558	2.62665287	1.064559958	2.467360199	0.013611336	0.029755764	0.756730866	1.023668527	1.385884281	0.338086638	0.038674338
HIC2	938.1157286	2.626014068	0.476781127	5.507797853	3.63E-08	2.86E-07	58.4327834	90.65608472	87.40628794	10.3840896	18.87307697
UPP1	8846.249868	2.62531138	0.603870257	4.347475885	1.38E-05	6.32E-05	268.2775427	298.9112098	255.2416533	55.54280486	42.50309752
FBXO32	76.33621327	2.623054774	0.66940702	3.918475148	8.91E-05	0.000335479	1.97408052	3.685206696	5.734693577	0.193192365	1.237578818
SH3BGRL2	700.7366393	2.621829868	0.447391184	5.8602627	4.62E-09	4.27E-08	93.90043008	106.1339528	77.56173063	16.37305291	17.21008044
SDC4	7586.040909	2.620114369	0.549933358	4.764421597	1.89E-06	1.05E-05	400.2777268	417.7795991	352.683655	109.5400708	24.86759937
PDE4C	86.36036557	2.617284784	0.727959978	3.595369065	0.000323932	0.00106633	1.6450671	1.392189196	2.007142752	0.193192365	0.425417719
EEFSEC	289.7513584	2.613646855	0.496013345	5.269307532	1.37E-07	9.63E-07	28.55836486	39.02224424	43.10578006	7.631098407	5.723802032
CMIP	321.6351629	2.611606505	0.302636846	8.629506089	6.16E-18	2.27E-16	26.65008702	20.59621076	21.4573118	3.235972109	5.259709976
PPM1N	499.8563146	2.609378946	0.753289352	3.463979598	0.000532247	0.001670092	4.968102642	9.499643927	10.94370691	0.724471368	2.513831974
TNFRSF12A	2617.166144	2.608948845	0.720494413	3.621053541	0.000293406	0.000974102	290.0911324	164.6058991	134.3829862	62.01474908	4.756943581
F3	382.4816609	2.607574087	0.618299573	4.217331208	2.47E-05	0.000106585	41.52149361	18.42603348	10.65697223	5.216193848	3.209970059
SH3GLB2	338.0889076	2.606757286	0.528241293	4.934785144	8.02E-07	4.81E-06	17.99703408	25.38697946	34.79047437	5.505982395	3.98345682
STEAP3	387.7193603	2.598805679	0.800769472	3.245385558	0.001172917	0.003379925	13.02893143	22.4388141	22.1741485	6.182155671	0.464092057
LTBP3	38.8674389	2.598795711	0.897079442	2.896951584	0.003768079	0.009555558	2.105685888	2.620591428	3.584183486	0.627875185	0.386743381
GPR157	379.4315873	2.597672983	0.514990535	5.044117912	4.56E-07	2.87E-06	27.3410152	37.05680066	47.59795669	7.34130986	6.419940117
ZNF114	1029.137677	2.597527963	0.415940404	6.244952248	4.24E-10	4.63E-09	75.80469197	86.23383668	119.8073066	20.86477539	13.34264663
HEPHL1	13.27936248	2.59702508	0.947336886	2.741395503	0.006117882	0.014627002	0.526421472	2.70248491	1.433673394	0.338086638	0.232046028
RP2	918.6127913	2.596780216	0.52926705	4.906370452	9.28E-07	5.48E-06	147.5954202	158.7095684	119.950674	29.31694135	22.46979041
AC007386.2	11.02441071	2.596339746	0.90948501	2.854736162	0.004307259	0.010743754	0.98704026	1.310295714	1.051360489	0.144894274	0.270720366
NPM2	43.17264575	2.595823334	0.872890482	2.973824765	0.00294113	0.007688418	0.427717446	4.299407812	2.007142752	0.048298091	0.812161099
ST3GAL6	360.4475838	2.584317396	0.459663478	5.622194321	1.89E-08	1.57E-07	40.86346677	33.49443419	32.3532296	3.042779744	10.79014032
MYDGF	3156.721265	2.58411272	0.505639625	5.110581907	3.21E-07	2.09E-06	211.0292076	180.1247139	247.2130823	47.52532172	30.51405273
AES	1929.112002	2.578577654	0.384682729	6.70312822	2.04E-11	2.83E-10	32.14461114	51.26531981	89.70016537	11.63983997	9.977979219
B3GNT2	185.8644701	2.578039231	0.374576586	6.88254239	5.88E-12	8.92E-11	20.00401594	19.61348897	10.51360489	3.042779744	3.209970059
DAG1	4050.031142	2.575433752	0.292443522	8.806602153	1.29E-18	5.21E-17	290.2227378	347.5149914	326.7341666	66.45817347	52.9451688
LINC01024	26.24779572	2.575343378	0.928392528	2.773981155	0.005537489	0.013384683	1.48056039	1.310295714	1.146938715	0.482980912	0
TSPAN15	376.8095607	2.574924398	0.650251757	3.959888413	7.50E-05	0.000287806	84.29323821	67.39833579	46.11649418	3.912145386	22.23774438
PLK3	197.4214608	2.571234303	0.460351828	5.585367863	2.33E-08	1.91E-07	22.96513672	21.33325209	17.4430263	2.752991197	5.143686962
AC010894.3	43.06626093	2.56925154	1.087139941	2.363312618	0.018112384	0.038108925	5.001003984	0.982721786	3.584183486	0.386384729	0.850835437
RIMKLA	39.01715186	2.569017635	0.939606144	2.734143079	0.006254286	0.014914456	0.197408052	1.228402232	1.051360489	0	0.309394704
NFKBIA	732.0988111	2.567707429	0.37358654	6.873126178	6.28E-12	9.49E-11	32.83553932	35.66461147	53.04591559	8.017483136	7.270775555
LINC00624	252.039155	2.566925395	0.690769658	3.716036693	0.000202372	0.000700234	4.869398616	24.44520442	10.08350287	1.255750371	3.867433806
CYBA	145.6043363	2.566334321	0.919278116	2.791684339	0.005243448	0.012770194	6.415761691	9.458697186	12.52074764	3.332568292	0
EGFR	1394.838508	2.566027816	0.726919431	3.530003059	0.000415555	0.001335751	108.3770206	126.2388027	141.3601967	40.86018514	3.325993073
RAB19	40.02654759	2.566001093	0.86687832	2.960047602	0.003075915	0.008008126	2.204389914	1.596922902	0.621258471	0.434682821	0.116023014
FBXW4P1	33.80782569	2.562082054	0.644059939	3.978018037	6.95E-05	0.000268963	2.13858723	2.948165357	4.539965749	0.241490456	1.005532789
SEPHS2	712.5988275	2.560396332	0.317465985	8.065104461	7.32E-16	2.05E-14	31.61818966	49.13608928	40.23843327	6.95492513	8.431005696
SH3TC2	216.5631902	2.55799168	0.879414634	2.908743592	0.003628844	0.009240586	8.850460999	4.545088258	8.602040366	2.270010286	0.386743381
MROH1	687.242624	2.552989188	0.333449352	7.656302745	1.91E-14	4.33E-13	41.06087482	33.0030733	40.90748085	7.148117495	7.502821583
SNORD17	116.6912019	2.542610328	0.44426666	5.723162588	1.05E-08	9.09E-08	7.896322081	6.264851383	8.267516574	1.593837009	1.276253156
NCEH1	743.2291652	2.540117741	0.390105869	6.511354856	7.45E-11	9.26E-10	72.58036046	70.83786204	76.89268305	19.1743422	8.198959668
TMEM63A	2075.553453	2.538989168	0.364685596	6.962131759	3.35E-12	5.29E-11	173.9164938	123.2496906	136.9635983	17.14582237	40.37600893
SNORA73B	72.38283665	2.530731679	0.665068215	3.80522121	0.000141678	0.000506865	4.046865066	4.749821964	3.679761712	0.869365641	0.734812423
AP1S3	204.1644872	2.526727385	0.396082898	6.37928928	1.78E-10	2.09E-09	31.2562749	20.10484986	22.69982874	2.994481653	6.845357836
XBP1	1445.213538	2.523961609	0.288884628	8.736919046	2.40E-18	9.23E-17	60.60427197	77.34839387	95.96053919	14.29623499	16.24322198
KRT8P33	23.85713365	2.522659788	0.595977214	4.232812475	2.31E-05	0.000100119	1.97408052	1.515029419	1.194727829	0.386384729	0.232046028
GPR22	21.80982643	2.517466687	0.878727985	2.864898728	0.004171426	0.010449104	4.902299958	1.392189196	1.194727829	0.193192365	0.812161099
TRIP10	1368.578148	2.513627246	0.373466812	6.730523748	1.69E-11	2.38E-10	50.89837608	119.1959632	95.96053919	18.11178419	16.47526801
FBXL18	218.5708829	2.511263274	0.427043149	5.880584388	4.09E-09	3.82E-08	17.10869784	17.27952473	19.02006703	3.477462565	3.519364763
SPSB1	45.33178357	2.510490327	0.64254285	3.907117365	9.34E-05	0.000348793	2.500501992	2.047337053	2.198299205	0.724471368	0.154697352
C12orf56	168.4026893	2.509672011	0.730380858	3.436114162	0.000590122	0.001829515	5.955142903	6.91999924	4.826700427	0.676173277	1.701670874
IQGAP1	7140.07966	2.507844806	0.490319909	5.114711353	3.14E-07	2.05E-06	628.4485336	697.8143612	565.0106847	175.0322824	62.61375331
LACC1	134.1029836	2.505529474	0.576322346	4.347444605	1.38E-05	6.32E-05	9.672994549	7.657040579	5.92585003	2.366606468	0.580115071
SH3BP1	88.23655898	2.504905588	0.360233672	6.9535576	3.56E-12	5.57E-11	4.902299958	5.978224196	8.793196818	1.20745228	1.39227617
RPARP-AS1	1133.893395	2.503950399	0.605878021	4.132763218	3.58E-05	0.000148255	49.51651971	49.46366321	59.16292207	17.29071664	2.281785945
CTSL	12653.46082	2.503648434	0.39266464	6.37604759	1.82E-10	2.13E-09	514.7414956	530.7107109	685.2003042	136.5870019	87.05593497
PTAFR	66.67414055	2.495603895	0.799348945	3.122045648	0.001795991	0.004968695	2.46760065	1.92449683	1.815986299	0.434682821	0.386743381
AC012617.1	24.93562662	2.494166876	0.654090602	3.813182561	0.000137189	0.000493077	1.019941602	0.941775045	1.194727829	0.144894274	0.270720366
SDF2L1	879.5278009	2.493359559	0.331097554	7.530588874	5.05E-14	1.07E-12	76.85753492	55.48283414	71.68366971	12.70239798	14.46420243
C2CD2	233.8281868	2.492447786	0.372340909	6.693993935	2.17E-11	2.99E-10	13.75276096	29.23597312	18.11207388	2.994481653	5.221035638
CCDC169	260.2069546	2.491227976	1.067569228	2.33355169	0.019619209	0.040821013	10.72583749	7.329466651	9.175509723	2.125116012	1.430950508
P2RX4	1005.121193	2.488312177	0.371061562	6.705928165	2.00E-11	2.78E-10	108.6731326	109.0821182	99.01904243	20.62328493	21.46425762
KLF16	33.6118036	2.488038593	0.727191825	3.421433669	0.000622919	0.001922307	1.710869784	2.579644687	1.959353639	0.627875185	0.19337169
OSGIN1	144.5020166	2.487037736	0.844258482	2.945824991	0.003220946	0.008331317	9.475586497	6.346744865	7.168366971	2.414904559	0.502766395
PFKFB4	2184.654687	2.482868044	0.273047071	9.093186884	9.62E-20	4.67E-18	123.80775	244.3701507	183.1756707	36.32016457	37.16603887
UAP1L1	136.3854087	2.474992098	0.917366546	2.697931497	0.00697718	0.016384101	4.11266775	7.452306874	5.734693577	1.593837009	0.657463747
CAMTA2	467.0932605	2.472126436	0.370219242	6.677466086	2.43E-11	3.33E-10	28.09774607	51.26531981	40.28622238	7.051521313	9.165818119
MORC4	310.3743212	2.470517143	0.588056308	4.201157457	2.66E-05	0.000113763	36.48758828	27.10674259	33.07006629	5.119597665	8.121610992
AP001453.2	23.04381288	2.469025558	0.848683074	2.909243312	0.003623048	0.009229013	1.085744286	0.286627187	1.242516942	0.241490456	0.116023014
KIAA1217	1686.317487	2.468985556	0.290671443	8.494076776	2.00E-17	6.89E-16	143.5156538	179.7152465	160.3324746	36.99633785	27.26540833
FAM89A	269.4771319	2.468713193	1.004786323	2.45695342	0.014012085	0.030496284	17.04289516	22.39786736	23.51224367	2.656395015	6.110545413
RCOR1	671.5856715	2.468199745	0.377659782	6.535511225	6.34E-11	8.04E-10	51.65510694	68.91336521	65.8056088	10.19089724	15.31503787
SLC10A4	13.59574973	2.45674615	0.855270849	2.872477359	0.004072673	0.010227781	1.677968442	1.064615268	1.338095168	0.434682821	0.116023014
TRIB1	239.8985381	2.448228797	0.621369567	3.940052631	8.15E-05	0.000309692	14.77270256	11.95644839	18.68554324	0.724471368	5.878499385
PCK2	3301.941411	2.447674658	0.744716177	3.286721481	0.00101361	0.002965458	52.70794989	305.2989014	132.0413196	49.55384155	14.03878471
AC006978.1	121.868723	2.444683497	0.634238034	3.854520489	0.000115957	0.000424628	5.198412036	6.879052499	7.407312537	0.772769459	1.972391241
ZNF468	3555.418657	2.440996717	0.380679396	6.412211286	1.43E-10	1.71E-09	118.7409433	145.6066112	175.5294126	24.24564177	37.32073622
PQLC3	752.5399822	2.439351465	0.543120968	4.491359399	7.08E-06	3.46E-05	40.1067359	49.0541958	37.22771914	9.224935416	8.005587978
SLC7A11-AS1	13.71316244	2.438063258	1.009589073	2.414906543	0.015739248	0.033770434	0.263210736	1.596922902	1.481462507	0.338086638	0.116023014
BCAM	94.65614818	2.432896871	0.587026718	4.144439761	3.41E-05	0.000141694	3.2901342	9.704377632	4.348809296	0.386384729	2.088414255
RDH13	1156.497384	2.432008543	0.304375768	7.990151647	1.35E-15	3.64E-14	91.46573077	91.55691302	119.2816264	17.58050519	24.82892503
TEPP	99.69525866	2.425011917	0.746219518	3.249729948	0.001155146	0.003336537	5.42872143	12.07928861	6.738264953	0.917663732	2.552506312
MBNL2	1800.641363	2.423527896	0.692310145	3.500639005	0.000464144	0.00147554	95.51259583	145.4428243	148.7197201	38.20379013	13.9227617
AL391422.3	52.35059933	2.423073101	1.045669567	2.317245502	0.020490362	0.04237068	2.039883204	2.252070759	4.157652843	1.110856097	0
AC011476.3	27.23303693	2.422323999	0.628586967	3.85360201	0.000116393	0.000425873	1.6450671	2.088283794	1.194727829	0.144894274	0.541440733
AL121929.2	36.09415255	2.421801676	0.994749516	2.434584423	0.014908902	0.032205847	4.310075802	3.439526249	7.263945198	0.386384729	1.817693889
SLC19A1	461.1258774	2.41753206	0.352026013	6.867481301	6.53E-12	9.86E-11	53.20147002	55.72851459	74.31207094	11.30175334	14.58022545
USHBP1	51.51908202	2.41497546	0.815696722	2.960629109	0.003070114	0.007995845	1.546363074	6.428638347	2.819557675	1.352346553	0.077348676
ACOX1	1635.039045	2.410353894	0.453938214	5.30987218	1.10E-07	7.87E-07	132.5266056	169.4785613	131.0855374	40.37720423	18.37031058
NME2P1	75.55575346	2.40996783	0.747117473	3.225687951	0.001256703	0.003600271	1.414757706	1.023668527	1.529251621	0.289788547	0.270720366
SNORD99	108.6845515	2.409953583	0.612114997	3.937092856	8.25E-05	0.000313213	10.39682407	6.101064419	5.161224219	1.593837009	1.430950508
MED12L	250.9527865	2.408578716	0.395230994	6.094103835	1.10E-09	1.12E-08	19.93821325	30.25964165	41.38537198	6.95492513	5.878499385
MR1	119.1390898	2.408052391	0.98208609	2.451976883	0.014207379	0.030866687	3.915259698	10.44141897	9.987924647	2.318308377	1.005532789
FOXC1	40.34360985	2.405753265	1.04967997	2.291892133	0.021911868	0.044867403	5.033905326	3.193845803	4.683333088	1.497240827	0.232046028
NFATC2	52.37895851	2.396402512	0.589373773	4.06601485	4.78E-05	0.000191998	8.850460999	11.62887446	7.837414555	2.704693106	1.19890448
PDZD7	62.36468195	2.395660863	0.568176627	4.21640164	2.48E-05	0.000106932	7.863420739	9.090176516	6.212584709	2.270010286	0.928184113
FXYD5	5104.523513	2.395641505	0.917608275	2.610745315	0.009034515	0.020653402	318.4191879	225.0432889	209.8897849	96.59618236	1.701670874
ATP8A2	85.80262874	2.395552395	0.943525673	2.538937163	0.011118979	0.024859739	3.882358356	2.866271875	4.014285504	0.144894274	1.469624846
GMDS	76.48636996	2.39514747	0.49610179	4.827935556	1.38E-06	7.83E-06	5.461622772	6.797159017	4.970067767	1.20745228	1.237578818
GAREM1	188.2722983	2.394846381	0.332162836	7.209856487	5.60E-13	1.03E-11	20.92525351	25.79644687	28.0044203	6.13385758	4.3702002
IGIP	32.32355085	2.392541512	0.784253737	3.050723762	0.002282905	0.006135151	1.710869784	2.047337053	2.962925015	0.386384729	0.580115071
SIRPA	86.93115907	2.390974316	0.461174685	5.184530707	2.17E-07	1.46E-06	12.60121399	16.91100406	8.219727461	2.366606468	3.016598368
TEAD3	1070.866673	2.390951114	0.525985636	4.545658569	5.48E-06	2.75E-05	53.00406197	83.24472459	90.1780565	17.77369756	14.15480773
AP003392.1	51.36847162	2.389628792	0.478516373	4.993828685	5.92E-07	3.64E-06	4.77069459	3.84899366	4.635543975	0.965961824	0.928184113
SH3GL3	59.91839671	2.389538387	0.56737854	4.21154171	2.54E-05	0.000109004	5.26421472	6.797159017	5.161224219	1.738731283	0.657463747
CLUH	149.8398849	2.384742368	0.499985426	4.769623766	1.85E-06	1.02E-05	11.64707507	11.13751357	15.81819645	1.931923647	3.712736453
HMG20B	271.5792083	2.384015675	0.43361377	5.49801653	3.84E-08	3.02E-07	18.55635689	23.29869567	29.86819571	5.264491939	4.988989609
SIAH2	248.5116645	2.38330361	0.3012558	7.91122897	2.55E-15	6.59E-14	29.67701049	37.05680066	47.69353492	7.389607951	9.127143781
JUP	6102.1077	2.382857967	0.522802352	4.557856253	5.17E-06	2.60E-05	344.5428535	527.8444391	510.5310957	135.2346553	55.65237246
OPN3	54.67327107	2.382286414	0.781100625	3.049909753	0.002289101	0.006148444	5.297116062	4.954555669	5.209013333	0.82106755	1.430950508
SLC1A5	2150.004465	2.381576423	0.508207005	4.686232971	2.78E-06	1.48E-05	67.31614574	337.5239866	154.6933592	43.90296488	35.00027594
RNF135	201.3917992	2.380984049	0.880532464	2.704027559	0.006850461	0.016132753	8.488546237	7.575147097	6.451530274	2.994481653	0
VEGFA	127.7495647	2.38077061	0.597895537	3.981917348	6.84E-05	0.000265213	4.968102642	13.67621152	14.43231217	1.20745228	3.712736453
TMEM144	385.7014086	2.38071275	0.640676249	3.715937268	0.000202452	0.000700346	21.55037901	17.23857799	13.71547547	4.540020571	2.823226678
AL080317.2	37.2928535	2.379041465	0.530674543	4.483051796	7.36E-06	3.58E-05	2.665008702	3.84899366	2.58061211	0.386384729	0.928184113
PDLIM1P4	11.53822703	2.376817982	0.829252439	2.866217656	0.004154085	0.010412738	1.052842944	1.310295714	0.90799315	0.048298091	0.425417719
AL359183.1	69.71679265	2.376531995	0.633472762	3.751593024	0.000175715	0.000616526	10.79164018	8.639762365	8.458673026	0.676173277	3.519364763
AC125807.2	96.18847218	2.37344746	0.484187674	4.901916316	9.49E-07	5.59E-06	10.23231736	7.329466651	6.212584709	2.173414103	1.19890448
TFRC	5142.773432	2.373326591	0.447753559	5.300519771	1.15E-07	8.25E-07	267.2576011	308.6155874	332.5166492	36.80314548	99.19967712
AL353583.1	32.95640962	2.372901275	0.72897634	3.255114252	0.001133468	0.003279055	4.244273118	2.374910982	2.915135902	0.82106755	0.541440733
CCDC120	162.8278809	2.371767145	0.519407919	4.566289923	4.96E-06	2.51E-05	14.08177438	11.6698212	14.95799241	2.125116012	3.867433806
CYB561	802.6429441	2.366978508	0.330387719	7.164244838	7.82E-13	1.39E-11	49.84553313	48.48094142	71.44472415	8.452165957	16.78466272
CDC14B	297.7279364	2.35932984	0.274712983	8.588344876	8.82E-18	3.21E-16	28.65706888	42.58461071	30.39387596	6.95492513	7.850890626
FDX1	514.4998173	2.35862607	0.393356102	5.996159867	2.02E-09	1.98E-08	15.89134819	9.499643927	21.17057712	4.057039659	2.668529326
GAB1	237.0875536	2.357972867	0.464365276	5.077840636	3.82E-07	2.45E-06	22.43871525	22.02934669	23.84676746	2.946183562	7.309449893
JCAD	169.2214364	2.35740009	0.614346365	3.83724919	0.00012442	0.000451475	32.44072321	21.5379858	18.11207388	4.008741568	6.651986146
AL157935.1	37.39278244	2.35625434	0.535576469	4.399473229	1.09E-05	5.09E-05	2.30309394	2.415857723	2.915135902	0.193192365	0.928184113
MAN1A2	3859.235266	2.348886157	0.377056517	6.22953337	4.68E-10	5.06E-09	179.6742287	178.8144182	240.0447153	37.47931876	51.43686962
AC008781.2	13.62615946	2.346690206	0.878736197	2.670528669	0.00757319	0.017637703	1.184448312	0.614201116	1.146938715	0.241490456	0.19337169
NFIL3	200.2605883	2.346252514	0.59094488	3.970340709	7.18E-05	0.000276763	5.132609352	7.69798732	12.80748232	0.627875185	3.325993073
ANXA11	716.9351268	2.346144134	0.52621643	4.458515548	8.25E-06	3.97E-05	75.64018526	75.26011008	78.94761491	25.01841123	7.193426879
PLD1	156.1244741	2.344007337	0.656560781	3.570129995	0.000356804	0.00116415	17.30610589	30.87384276	19.11564526	6.52024231	3.055272706
SUSD1	96.03604471	2.341216276	0.470156853	4.979649367	6.37E-07	3.89E-06	8.356940869	8.312188436	11.13486336	2.366606468	1.701670874
SLC10A3	373.3787394	2.339966445	0.389277338	6.011052314	1.84E-09	1.81E-08	27.99904204	26.00118058	32.06649492	6.95492513	5.646453356
SMPDL3A	362.5390138	2.339184063	0.488649776	4.787035985	1.69E-06	9.47E-06	10.66003481	27.55715674	17.06071339	5.071299574	2.900575354
GCH1	192.4706949	2.337867789	0.504202389	4.636764599	3.54E-06	1.85E-05	7.633111345	6.264851383	5.161224219	0.82106755	2.049739917
AC145423.2	7.821151608	2.33697638	0.904525615	2.583648647	0.009776133	0.02213583	0.888336234	1.023668527	1.385884281	0.144894274	0.348069043
ALS2CL	209.3030603	2.333961073	0.933017184	2.501519923	0.012366148	0.027325169	13.65405693	5.36402308	4.874489541	3.235972109	0.038674338
ZNF697	152.0516575	2.333861211	0.537170699	4.344729181	1.39E-05	6.38E-05	9.541389181	14.20851915	12.75969321	0.869365641	4.795617919
TMEM62	91.53777028	2.328427687	0.516533695	4.507794376	6.55E-06	3.23E-05	10.56133078	9.663430891	7.120577858	1.835327465	2.243111607
FAM13A-AS1	36.34412367	2.328216624	0.693708471	3.356188831	0.000790246	0.002378476	5.001003984	2.006390312	3.631972599	0.144894274	1.508299184
AL445250.1	14.7347155	2.328062096	1.035853338	2.247482353	0.024609217	0.049574603	1.184448312	1.269348973	1.051360489	0	0.541440733
FAIM	422.4404964	2.323521135	0.762160825	3.048596907	0.002299127	0.006172003	48.89139422	26.36970125	23.94234568	13.04048462	0.657463747
CRIM1	828.7721135	2.322995025	0.440092285	5.27842706	1.30E-07	9.22E-07	126.8346734	104.2504028	88.98332867	34.67802947	10.90616333
XDH	80.14684689	2.322514354	0.795935034	2.917969751	0.003523185	0.008997936	2.171488572	1.842603348	1.242516942	0.579577094	0.19337169
IGSF10	74.48531431	2.321688318	0.732547033	3.169336867	0.001527872	0.00430113	1.97408052	8.230294954	6.69047584	2.02851983	0.386743381
ESYT3	45.47359164	2.321538897	0.541961951	4.28358281	1.84E-05	8.17E-05	2.006981862	3.726153437	4.062074617	1.062558006	0.386743381
PPP1R15A	2840.684985	2.319171378	0.571327518	4.059267765	4.92E-05	0.000197148	43.82458755	57.7349049	79.71224072	11.59154188	15.93382728
INSR	5410.638439	2.317054626	0.49357504	4.694432332	2.67E-06	1.43E-05	230.2764927	303.2106176	318.9445411	18.73965938	117.1832443
PARD6B	3063.430434	2.315433625	0.652890177	3.546436606	0.000390479	0.001264791	270.810946	143.6821144	346.9967505	33.22908673	85.81835615
GSDMD	163.2637155	2.312491272	0.842854381	2.743642702	0.006076163	0.014546116	3.421739568	4.504141517	2.58061211	1.448942735	0.038674338
RPSAP36	22.06650803	2.312067069	0.828668347	2.790099414	0.005269186	0.012820082	2.270192598	1.351242455	2.293877431	0.144894274	0.773486761
PXN	2034.850698	2.305263279	0.315564211	7.305211433	2.77E-13	5.34E-12	114.7927822	132.2170269	108.2423413	31.49035545	21.15486292
SMARCD2	820.949112	2.304184148	0.29690138	7.760772772	8.44E-15	2.02E-13	36.58629231	59.24993432	54.09727608	12.31601325	10.17135091
ESRRA	145.6719178	2.298924176	0.455963937	5.041899124	4.61E-07	2.91E-06	8.291138185	9.99100482	13.04642789	2.366606468	2.39780896
WWC1	394.225979	2.292160922	0.425665664	5.384885637	7.25E-08	5.40E-07	38.13265538	36.03313214	43.91819498	6.13385758	12.33711384
MYH14	57.1680513	2.289743331	0.714673792	3.203899957	0.001355796	0.003855708	2.237291256	12.98011692	3.34523792	1.787029374	0.966858451
SOX13	824.3456595	2.283981455	0.556754188	4.102315712	4.09E-05	0.000166941	64.68403838	88.89537485	91.13383876	6.182155671	33.56932543
ADGRG6	1801.10057	2.283252584	0.722372222	3.160770186	0.001573526	0.004415329	6.777676453	6.838105758	7.789625442	2.801289289	0.309394704
BCR	724.5917698	2.280020302	0.379812312	6.003018416	1.94E-09	1.90E-08	58.16957266	61.46105834	71.2535677	6.810030857	23.86206658
ACADS	224.3701414	2.279731712	0.431476126	5.283563962	1.27E-07	8.99E-07	12.50250996	11.05562009	13.14200611	1.20745228	4.640920567
SLC39A8	859.5912524	2.27809569	0.503660241	4.523080248	6.09E-06	3.03E-05	36.12567352	35.86934517	27.6221074	9.466425872	5.491756004
ANKRD33B	235.7768978	2.277902713	0.592408905	3.84515272	0.000120477	0.000439015	25.99206018	15.3550279	10.27465933	4.684914845	3.093947045
TJP2	643.2936365	2.274808448	0.457781248	4.969204086	6.72E-07	4.10E-06	37.34302317	46.72023156	43.58367119	10.09430106	9.513887162
ABCA7	250.0912633	2.274114751	0.399667357	5.690018735	1.27E-08	1.09E-07	15.72684148	16.78816384	13.28537345	4.733212936	2.165762931
AL024507.2	33.32939882	2.272578301	0.547833583	4.148300454	3.35E-05	0.00013972	3.520443594	2.743431651	1.529251621	0.627875185	0.580115071
USP53	500.5530846	2.271630154	0.359154302	6.324942071	2.53E-10	2.88E-09	32.40782187	37.83478874	38.80475987	6.810030857	10.28737392
ATP11A-AS1	46.51449783	2.26929422	0.965259849	2.350967175	0.018724686	0.039175271	1.283152338	0.36852067	1.624829847	0.241490456	0.270720366
OCEL1	197.4691546	2.267785479	0.429380749	5.281525739	1.28E-07	9.07E-07	8.258236843	14.33135937	13.094217	3.574058747	1.856368227
RBM11	76.38324294	2.267699828	0.804170659	2.81992361	0.004803508	0.011821678	5.198412036	8.967336293	8.3630948	0.144894274	3.596713439
ITGA6	951.3914445	2.265883827	0.416811034	5.436237626	5.44E-08	4.12E-07	131.9014801	129.4735952	109.1503344	27.09522915	30.47537839
ADCY5	201.8037395	2.265259262	0.594920141	3.807669477	0.000140283	0.000502362	4.079766408	2.661538169	8.936564158	0.869365641	1.624322198
FBLN2	1842.534634	2.265170788	0.908986094	2.491975181	0.012703491	0.027953365	92.18956029	134.0186835	94.09676378	42.21253169	4.060805496
MAP2K3	181.6589786	2.262341683	0.565879893	3.997918483	6.39E-05	0.000249289	11.77868044	12.69348973	15.77040734	2.46320265	3.906108144
FERMT3	22.38321843	2.261434195	0.663433364	3.40868325	0.000652772	0.002004788	2.30309394	1.474082678	1.720408073	0.434682821	0.425417719
PEG10	8157.009914	2.259463963	0.596250561	3.789453815	0.000150979	0.000536628	937.0960229	1745.805252	2270.651922	539.6345728	205.8635015
AL354836.1	12.8491998	2.253081221	0.95688049	2.354610889	0.01854211	0.038853898	1.085744286	0.818934821	1.815986299	0.241490456	0.348069043
SND1-IT1	107.9247238	2.252602789	0.518175816	4.347178542	1.38E-05	6.32E-05	11.41676568	6.715265535	7.789625442	1.497240827	2.629854988
ABHD11	1303.39392	2.251804931	0.318434483	7.07148581	1.53E-12	2.60E-11	108.2125138	115.1422359	99.87924647	27.72310434	22.3537674
MYCN	1053.567823	2.250562809	0.589884542	3.815259849	0.00013604	0.000489544	25.86045481	29.56354705	40.38180061	2.076817921	13.9227617
TMEM92	446.1276723	2.249737989	0.915604398	2.457107014	0.014006096	0.030487745	22.24130719	31.48804388	14.43231217	9.611320145	0.232046028
MGAT3	407.2560439	2.248568361	0.543976553	4.133575883	3.57E-05	0.000147814	21.22136559	36.72922674	32.3532296	4.443424389	10.17135091
CXCL16	22.46795369	2.248453813	0.734613606	3.06072988	0.002207982	0.005955496	1.48056039	3.644259955	1.481462507	0.386384729	0.657463747
SIGIRR	377.2836538	2.247204259	0.554123674	4.055420048	5.00E-05	0.000200259	24.41279577	24.32236419	20.02363841	1.883625556	9.475212824
CCDC88B	24.56275437	2.246400245	0.728833239	3.082186876	0.002054858	0.005587426	1.283152338	1.760709866	1.911564526	0.579577094	0.19337169
AP001542.3	21.4629349	2.24241954	0.684069177	3.278059611	0.001045233	0.003048384	1.97408052	2.170177276	2.341666544	0.048298091	1.005532789
ACOT11	155.5114179	2.242265106	0.701803219	3.195005444	0.001398282	0.003968235	14.97011061	9.417750445	10.13129199	4.588318662	0.541440733
PLCD3	287.8935566	2.240187408	0.433385076	5.169046039	2.35E-07	1.58E-06	29.24929304	35.70555821	27.09642715	5.264491939	9.5525615
TCEA3	161.5489063	2.236306468	0.9404806	2.377833704	0.017414678	0.036831444	13.81856364	14.04473219	17.4430263	5.554280486	1.276253156
AL354893.1	7.427771686	2.236043865	0.926770511	2.4127266	0.015833692	0.033940184	1.052842944	1.023668527	0.76462581	0.144894274	0.309394704
CEP85	6809.154982	2.232198691	0.429552652	5.196565962	2.03E-07	1.38E-06	213.661315	304.889434	355.1686889	61.8698548	78.39288324
PYGL	4244.071519	2.232158423	0.52435243	4.25698117	2.07E-05	9.10E-05	293.2825626	276.3495554	450.9380716	90.31743051	70.50331828
ATG2A	229.9273312	2.230552303	0.346093154	6.444947771	1.16E-10	1.40E-09	15.4307294	15.43692138	18.68554324	3.67065493	4.254177186
GNE	689.3356985	2.229768457	0.433244623	5.146673122	2.65E-07	1.76E-06	55.66907067	85.86531601	95.43485895	15.60028345	22.70183644
AC011447.7	282.9520512	2.229746787	0.583927192	3.818535631	0.000134246	0.000483916	17.56931663	11.6698212	7.550679877	3.525760656	2.204437269
GCNT2	997.9914469	2.228896096	0.392194322	5.683142185	1.32E-08	1.14E-07	27.01200178	26.69727517	18.87669969	2.994481653	8.933772091
SLC44A2	7892.012397	2.228450425	0.282618808	7.885003988	3.15E-15	8.04E-14	803.4178704	695.0299828	600.3268393	207.8749844	117.376616
SEMA6A	4509.973842	2.22753944	0.583602977	3.816874704	0.000135153	0.000486827	229.2236497	301.4908545	269.4350199	85.05293857	38.17157166
SLC16A13	235.756531	2.2274247	0.560221691	3.975970115	7.01E-05	0.000271075	39.05389296	34.47715598	29.53367192	8.500464048	7.812216287
EPB41L3	591.1795065	2.227226746	0.500667025	4.448518943	8.65E-06	4.13E-05	39.51451175	50.77395892	68.14727534	12.75069607	12.53048553
CYB5R1	3289.032812	2.225774223	0.490282875	4.539775581	5.63E-06	2.82E-05	326.7103261	260.7079004	344.7028731	92.20105607	53.13854049
PCDHGB5	26.94084501	2.224828132	0.87759056	2.535155043	0.011239757	0.025087953	2.335995282	2.456804464	0.812414923	0.676173277	0.19337169
ABTB1	420.5565936	2.224428171	0.650754106	3.418231479	0.000630295	0.00194263	13.48955022	19.08118134	16.15272024	6.713434674	0.580115071
FRRS1	56.06037362	2.223533676	0.599445168	3.70931954	0.000207817	0.000716721	5.626129483	7.206626427	6.69047584	1.159154188	2.011065579
SCARA3	374.2902117	2.223112711	0.671575812	3.310293003	0.000931984	0.002748998	50.33905326	28.82650571	23.12993076	3.574058747	13.49734398
FRAT2	228.6920706	2.221185588	0.655641757	3.387803726	0.000704547	0.002145044	1.6450671	3.398579508	3.727550825	0.531279003	0.889509775
CLMP	637.9842157	2.219225897	0.802737361	2.764572829	0.005699738	0.013747578	66.78972427	69.24093914	69.62873785	28.64076807	2.011065579
SPATA2L	21.72236682	2.21714308	0.821189722	2.69991577	0.006935703	0.016299676	1.97408052	2.170177276	2.58061211	0.434682821	0.657463747
SMG7-AS1	9.837884176	2.215992329	0.904806929	2.449132802	0.014320064	0.031061191	1.217349654	0.900828303	1.003571376	0.048298091	0.464092057
LARP1B	879.195872	2.215276013	0.361760995	6.123590003	9.15E-10	9.46E-09	60.90038405	59.29088106	71.44472415	8.59706023	23.35930019
ARPC1B	292.3388526	2.214083668	0.336594561	6.577894959	4.77E-11	6.20E-10	15.16751866	13.18485062	14.09778838	3.815549203	2.97792403
CD9	6979.638749	2.214049154	0.645509003	3.429927614	0.000603742	0.001868208	323.4530932	344.0754652	310.1035552	44.62743625	118.4594975
TBC1D10A	316.4168386	2.214047077	0.427471709	5.17940025	2.23E-07	1.50E-06	13.06183278	14.6589333	14.62346862	3.235972109	3.596713439
RILPL2	183.964375	2.213631396	0.589299455	3.75637781	0.00017239	0.000605583	9.080770393	38.61277682	43.72703853	9.80451251	4.524897553
DUSP14	2446.092173	2.212148453	0.365865006	6.046351571	1.48E-09	1.48E-08	314.9974483	285.6444657	274.7874006	73.36480051	66.67455881
PLEC	347.8263527	2.209061106	0.468210639	4.718092506	2.38E-06	1.29E-05	25.82755347	21.5379858	21.98299205	6.037261398	5.066338285
HSPBAP1	563.9472789	2.208964681	0.44338076	4.982094125	6.29E-07	3.85E-06	26.68298836	42.1751433	52.75918091	4.057039659	16.59129103
AL353795.3	39.02417148	2.208890851	0.491310736	4.49591407	6.93E-06	3.40E-05	2.171488572	1.92449683	1.529251621	0.289788547	0.618789409
RXRA	388.8246778	2.208079086	0.394144814	5.602202557	2.12E-08	1.75E-07	25.66304676	40.25064647	38.85254899	8.645358322	8.237634006
S1PR2	5017.122384	2.207709788	0.436463583	5.058176379	4.23E-07	2.68E-06	532.7385297	980.5106615	694.1846575	225.1657011	121.3213985
HSPA1B	556.7206014	2.203147099	0.312924345	7.040510385	1.92E-12	3.15E-11	24.31409174	28.21230459	31.82754935	7.244713677	6.381265779
PKMYT1	185.6151822	2.202197679	0.312013421	7.058022286	1.69E-12	2.82E-11	19.08277836	17.36141821	17.53860452	3.622356839	5.221035638
CDKN1C	2445.978244	2.196955831	0.770660511	2.850744005	0.004361707	0.010870376	23.52445953	255.9990251	201.7656357	28.39927762	51.93963601
DCAF4	1654.696201	2.196096179	0.364135741	6.030982218	1.63E-09	1.62E-08	109.5614689	79.43667767	87.2629206	16.90433191	28.9670792
KIAA1522	544.5433468	2.194709511	0.336747764	6.517369216	7.16E-11	8.95E-10	46.52249759	57.61206468	50.79982727	10.14259915	15.46973522
NEDD4L	1433.401919	2.194330586	0.628700469	3.490263954	0.000482544	0.001529748	86.89244423	154.2873203	227.4761786	20.23690021	59.82920097
LRRC1	423.3897959	2.192673462	0.30636579	7.157044087	8.24E-13	1.46E-11	35.27023863	38.57183008	41.52873932	9.466425872	9.35918981
PHKA1	446.7532971	2.191519491	0.53118322	4.125731781	3.70E-05	0.000152431	6.876380479	12.85727669	11.56496538	0.965961824	4.3702002
TNS3	1700.191998	2.185535062	0.455127255	4.802030729	1.57E-06	8.82E-06	102.3889763	86.60235735	95.19591338	33.51887528	11.1768837
BIK	295.5127879	2.18260037	0.896919564	2.433440476	0.014956094	0.032303062	13.3908462	20.88283794	5.304591559	3.622356839	2.745878002
SETD7	447.3856545	2.181555257	0.410810138	5.310373468	1.09E-07	7.85E-07	53.72789149	42.13419656	29.72482837	11.39834952	8.972446429
TAGLN2P1	32.25083607	2.181153825	0.818143509	2.665979503	0.007676437	0.017852799	1.15154697	1.187455491	0.716836697	0.386384729	0.116023014
GM2A	6646.786634	2.178224551	0.547239342	3.980387343	6.88E-05	0.000266646	425.6446615	346.163749	313.0664802	97.99682701	78.54758059
DNAH3	45.17455043	2.178123905	0.594599288	3.66317947	0.000249104	0.000842761	1.414757706	1.760709866	1.385884281	0.289788547	0.464092057
SOCS6	782.5656998	2.17804886	0.264306059	8.240631586	1.71E-16	5.19E-15	95.94031328	72.3938382	80.7158121	17.72539946	23.74604357
DVL1	139.5247573	2.175192587	0.386462458	5.628470613	1.82E-08	1.52E-07	9.245277103	9.090176516	10.99149602	1.787029374	3.132621383
AC092687.3	56.77569198	2.174549309	0.431654859	5.03770377	4.71E-07	2.96E-06	4.737793248	4.258461071	4.301020183	1.159154188	1.044207128
CDC42EP3	394.0464632	2.172984676	0.45503991	4.77537163	1.79E-06	9.97E-06	34.7767185	47.37537941	37.13214091	7.77599268	12.25976516
DDIT3	2857.632533	2.170120783	0.560891653	3.869055232	0.000109258	0.000401993	27.73583131	56.8340766	64.75424831	9.466425872	15.8564786
ZNF593	32.78520877	2.169123694	0.479705431	4.521782649	6.13E-06	3.04E-05	2.13858723	3.808046919	2.532822997	0.482980912	0.928184113
STOM	2768.442917	2.168102451	0.317351291	6.831869013	8.38E-12	1.24E-10	64.15761691	54.13159169	63.41615314	17.62880328	12.10506781
DNAJC15	4435.065725	2.16339715	0.678546091	3.188283271	0.001431203	0.004047805	172.9623549	103.0220005	118.8037353	43.51658016	20.07198145
FAM120A	1275.077549	2.161610841	0.288902312	7.48215141	7.31E-14	1.50E-12	90.97221064	99.78720798	104.9926816	28.97885471	19.56921506
STX3	450.3242058	2.161396116	0.436172443	4.955370632	7.22E-07	4.37E-06	35.1715346	24.81372509	30.44166507	9.128339233	5.685127694
JUND	864.8495457	2.160890317	0.401289053	5.384872328	7.25E-08	5.40E-07	47.14762309	52.20709486	69.4375814	11.88133043	16.70731404
DVL3	898.3550912	2.157208218	0.382907039	5.633764851	1.76E-08	1.48E-07	48.82559153	69.93703374	101.0739743	18.01518801	18.95042565
DNMT1	4845.377693	2.156903389	0.297051489	7.261042169	3.84E-13	7.26E-12	518.7554594	821.1049986	686.1082974	148.0336495	194.1065027
FAM102A	558.0806083	2.152533717	0.423622434	5.081255253	3.75E-07	2.41E-06	30.03892525	56.67028963	60.02312611	8.548762139	16.74598838
RYBP	2552.127586	2.149536475	0.381153116	5.639561591	1.70E-08	1.44E-07	62.38094444	76.7751395	100.118192	18.73965938	21.81232666
ALDH5A1	139.7549244	2.149421835	0.670178393	3.207238338	0.001340159	0.003812709	11.08775226	24.07668375	19.2590126	1.931923647	7.657518935
AC011447.3	547.2071016	2.148261801	0.50528058	4.251621547	2.12E-05	9.30E-05	19.04987702	17.36141821	10.27465933	4.684914845	3.016598368
ANO6	887.1695903	2.146210746	0.280488101	7.651699799	1.98E-14	4.47E-13	87.22145765	136.5983282	104.0368993	28.30268143	26.68529326
MLLT1	300.7293388	2.145805357	0.41874755	5.124341281	2.99E-07	1.96E-06	27.86743668	29.97301446	65.99676525	8.741954504	12.56915987
EML2	1584.690402	2.143213614	0.499005915	4.294966354	1.75E-05	7.80E-05	104.5933662	86.92993128	103.8457429	34.00185619	14.19348207
PAPOLA	5418.666954	2.141967801	0.272115201	7.871547766	3.50E-15	8.92E-14	445.122256	558.9639623	688.6411204	121.0833146	169.432275
GABARAPL1	3195.070857	2.14160768	0.471347519	4.543585344	5.53E-06	2.77E-05	168.8167858	121.6937144	125.3030547	42.06763742	26.76264194
OSBPL3	266.3626889	2.136875086	0.603289129	3.542041424	0.000397043	0.001284643	43.06785668	27.47526325	24.61139327	3.429164474	13.45866964
MED16	514.0248581	2.136531206	0.368461987	5.798511865	6.69E-09	6.02E-08	42.60723789	32.71644611	31.06292354	7.969185045	10.21002525
LAMA1	1475.180845	2.136435688	0.545500671	3.916467572	8.99E-05	0.000338025	232.5795866	267.7507398	231.3948858	52.54832321	73.01715025
ERRFI1	851.565866	2.134254322	0.617861093	3.454262365	0.0005518	0.001722657	35.46764668	68.25821736	82.10169638	22.50691049	7.928239302
IER2	256.2107039	2.133987029	0.526874928	4.050272497	5.12E-05	0.000204327	12.17349654	12.93917018	20.31037309	4.781511027	2.823226678
SLC5A6	10700.17652	2.131964652	0.304122763	7.010210711	2.38E-12	3.85E-11	842.9323821	492.3436146	739.4409477	150.9315349	206.8303599
KCNG1	53.38079672	2.131502492	0.628238081	3.392825993	0.000691756	0.002110892	1.97408052	4.21751433	4.10986373	0.338086638	1.469624846
DDIT4L	467.9492904	2.131221709	0.451423713	4.721111563	2.35E-06	1.27E-05	7.830519397	11.13751357	9.605611742	2.704693106	2.127088593
PAQR7	930.2680447	2.130174643	0.371774292	5.7297524	1.01E-08	8.78E-08	78.86451678	61.58389856	59.40186764	23.42457422	9.436538486
ZC3H12A	84.41969911	2.126951118	0.527586448	4.031474135	5.54E-05	0.000219658	4.211371776	5.077395892	5.447958898	1.352346553	1.160230142
R3HDM4	374.1968391	2.12579803	0.333392058	6.376270748	1.81E-10	2.13E-09	24.93921724	38.2852029	27.66989651	6.182155671	9.5525615
SDC1	2047.181899	2.124507937	0.446499424	4.758142613	1.95E-06	1.08E-05	109.0679487	81.5659082	159.0899577	36.32016457	22.58581343
RASGEF1B	242.4305662	2.124426777	0.703315046	3.020590542	0.002522823	0.006706617	43.002054	30.17774817	16.96513517	1.980221738	14.34817942
PMAIP1	2683.572179	2.122908861	0.864699553	2.455082639	0.01408522	0.030632863	7.238295241	22.88922826	54.28843253	5.795770942	9.088469443
BNIP3P17	32.15807236	2.120168399	0.8128418	2.608340762	0.009098233	0.020776247	2.30309394	1.760709866	1.099149602	0.531279003	0.348069043
AC010615.2	392.4612931	2.119937366	0.4721211	4.490240669	7.11E-06	3.48E-05	16.35196698	15.51881486	11.75612183	5.505982395	1.701670874
SHANK2	394.9148218	2.11958018	0.674244876	3.143635574	0.001668631	0.004655632	23.06384074	21.49703906	32.01870581	9.852810601	2.745878002
STK10	996.9648601	2.115193593	0.626466935	3.376385048	0.000734451	0.00222644	88.96522878	64.81869111	86.11598188	27.86799861	12.10506781
MTMR7	130.0114489	2.113857198	0.721770816	2.928709712	0.003403721	0.008738212	10.10071199	17.48425843	9.414455289	0.289788547	6.535963132
RALBP1	1622.175504	2.112677626	0.486230788	4.345009983	1.39E-05	6.37E-05	70.93529336	91.92543369	53.38043938	20.04370784	16.78466272
TAGLN2	18277.76762	2.111918278	0.61509352	3.433491349	0.000595861	0.001846531	790.2244322	624.1102273	810.4077807	247.2862269	126.1943651
ABHD5	852.3205562	2.106680831	0.295610738	7.126536896	1.03E-12	1.79E-11	51.91831768	44.91857495	62.79489467	12.84729225	15.00564317
FAM184A	168.5421323	2.106533276	0.710088347	2.966579138	0.003011329	0.007860782	8.324039527	31.24236343	26.04506666	3.574058747	8.16028533
NOS3	87.08838397	2.102047381	0.797421453	2.636055719	0.008387596	0.019357201	1.546363074	2.170177276	7.168366971	1.593837009	0.232046028
AK5	167.9149922	2.101904098	0.458890231	4.580407156	4.64E-06	2.37E-05	2.994022122	3.480472991	4.062074617	0.386384729	1.469624846
DGUOK-AS1	24.1697998	2.099558333	0.868769096	2.416704673	0.015661718	0.033610617	2.46760065	1.801656607	2.150510091	0.193192365	0.966858451
GCLM	309.1225056	2.099403032	0.508009855	4.132602964	3.59E-05	0.000148317	21.84649109	21.66082602	20.21479486	6.906627039	3.944782482
CYTH3	175.965654	2.097738195	0.390131748	5.376999458	7.57E-08	5.61E-07	10.52842944	10.89183312	13.57210813	3.091077836	3.016598368
ELF3-AS1	35.71976784	2.095459787	0.571118175	3.669047629	0.000243456	0.000825925	1.6450671	2.579644687	3.34523792	0.482980912	0.850835437
AP5B1	260.5163571	2.095432903	0.57010924	3.675493672	0.00023739	0.000808131	7.205393899	12.73443647	21.21836624	2.656395015	4.718269243
LRRFIP1	1907.627558	2.091698863	0.375559766	5.56954992	2.55E-08	2.08E-07	169.1128979	159.3237695	113.1168308	42.79210879	33.3372794
PLXND1	373.8063648	2.086130974	0.676265306	3.084781897	0.002037015	0.005544017	38.79068222	48.39904794	48.60152807	19.94711166	2.436483298
TLCD1	170.9366397	2.08545344	0.43349862	4.810749891	1.50E-06	8.48E-06	7.929223423	4.790768705	4.348809296	1.787029374	1.19890448
TEAD4	750.7752983	2.085198552	0.440653424	4.732060247	2.22E-06	1.21E-05	63.69699812	59.57750825	43.53588207	20.57498684	7.580170259
TMEM189	1485.69209	2.081688342	0.312650115	6.658204297	2.77E-11	3.77E-10	121.60336	143.9277948	132.0891087	40.37720423	28.61901016
PPP1R14A	164.6452723	2.076068894	0.579575562	3.582050438	0.000340908	0.001117475	10.85744286	5.855383972	7.550679877	2.02851983	2.281785945
SLC12A4	869.9172515	2.074569715	0.404413747	5.129819969	2.90E-07	1.90E-06	84.85256103	55.48283414	63.46394225	23.66606468	11.37025539
HPSE	121.3036409	2.072319567	0.657816842	3.150298736	0.001631036	0.004559817	2.13858723	3.275739285	2.341666544	0.965961824	0.386743381
TRHDE-AS1	42.90593812	2.072091364	0.751579573	2.756982015	0.005833756	0.014016352	4.902299958	5.282129597	6.977210519	0.193192365	3.055272706
ZNF571-AS1	46.76837741	2.071612501	0.60635229	3.416516328	0.000634279	0.001951647	2.46760065	3.685206696	1.385884281	0.241490456	1.121555804
RREB1	901.931006	2.071596935	0.339857507	6.095486754	1.09E-09	1.12E-08	67.08583634	84.96448771	88.21870286	23.95585323	18.21561322
DGKZ	405.9411946	2.071255736	0.45613329	4.540900169	5.60E-06	2.81E-05	25.39983603	13.51242455	19.59353639	6.375348036	3.828759468
KLF6	3873.294992	2.063806698	0.517022105	3.991718491	6.56E-05	0.000255358	301.6066021	265.2120419	191.5387655	86.26039085	44.86223215
TACC1	1719.115731	2.060504156	0.596812104	3.452517373	0.000555382	0.001732735	192.5386534	236.1398557	186.7598542	81.28568746	23.51399754
PRICKLE3	96.2656535	2.05921143	0.563732858	3.652814276	0.000259382	0.000873726	4.9352013	5.527810044	6.212584709	1.931923647	1.005532789
GLDC	897.288214	2.058383166	0.821616063	2.505285934	0.012235244	0.027052515	72.15264301	86.1519432	68.67295559	0.772769459	43.35393296
GPR18	30.42730406	2.052592417	0.844882822	2.42944035	0.015122153	0.032618749	3.059824806	2.170177276	1.768197186	0.048298091	1.276253156
HIP1R	245.5577136	2.050747817	0.322663013	6.355695374	2.07E-10	2.40E-09	22.34001122	23.09396196	26.14064489	5.795770942	7.193426879
CLU	18385.70971	2.050673243	0.585046301	3.505146928	0.000456355	0.001452971	3645.896411	2482.723751	2326.995286	875.547797	619.137478
KCNQ1OT1	2742.964529	2.049361784	0.490832201	4.175279816	2.98E-05	0.000125603	135.5206277	174.5150104	185.0394461	29.84822035	62.07231258
ATP10D	1460.982725	2.048246975	0.613742538	3.337306522	0.000845946	0.00252327	71.26430678	59.3318278	87.74081173	23.5694685	15.16034052
ACSS2	629.1739083	2.04739443	0.534969338	3.82712482	0.000129649	0.000468603	37.01400975	52.16614812	51.9945551	9.031743051	17.09405742
FAM196A	42.53586036	2.042277064	0.717300815	2.847169584	0.004410986	0.010976503	3.224331516	2.006390312	2.102720978	0.531279003	0.812161099
LIFR	2965.734965	2.040674289	0.488802655	4.174842889	2.98E-05	0.000125808	46.55539893	47.53916638	74.40764916	21.29945821	8.276308344
CCNYL1	457.0283325	2.039216579	0.428754912	4.756135781	1.97E-06	1.09E-05	43.82458755	39.02224424	26.9052707	8.307271683	11.79567311
PFKP	4335.737247	2.031718204	0.639468883	3.177196356	0.001487063	0.004194252	607.5890828	568.176979	511.9647691	222.992287	71.00608467
NOCT	421.1603153	2.030867096	0.477058975	4.257056683	2.07E-05	9.10E-05	29.8415172	22.56165433	18.25544122	4.540020571	8.624377387
LMNA	1507.314508	2.02994866	0.636232338	3.190577619	0.001419887	0.004020152	97.68408441	86.43857039	125.446422	37.72080921	17.1714061
NFKB2	197.4775786	2.029496734	0.650780513	3.118557935	0.001817384	0.005016592	6.020945587	7.575147097	8.219727461	1.980221738	2.011065579
NECTIN1	924.2502011	2.029063599	0.55413981	3.661645604	0.0002506	0.000846659	167.7310415	94.75075883	83.86989357	18.44987083	46.9506464
1-Mar	282.8688874	2.023491792	0.537838782	3.762264567	0.000168382	0.000592489	21.94519512	18.09845955	27.33537272	1.497240827	11.67965009
SLC52A2	387.77367	2.022598751	0.399233192	5.066208907	4.06E-07	2.59E-06	34.80961984	23.50342937	21.12278801	7.77599268	6.690660484
SYNE2	2193.485907	2.022361478	0.491356169	4.115876844	3.86E-05	0.000158341	149.0759806	189.2967839	136.86802	12.99218653	79.55311338
DNAJC6	98.21601581	2.018408096	0.580113509	3.479333038	0.000502663	0.0015865	15.59523611	10.03195156	8.3630948	0.965961824	5.607779018
MTUS1	891.8373177	2.017908546	0.660091074	3.05701535	0.002235528	0.006019891	54.64912907	76.81608624	91.13383876	11.30175334	31.44223684
HERC5	296.7295001	2.015219499	0.76149757	2.646389928	0.008135598	0.018843424	9.179474419	18.46698022	17.72976098	0.241490456	8.817749077
PUSL1	355.4750561	2.013910245	0.368541733	5.464537843	4.64E-08	3.57E-07	27.73583131	23.91289678	27.76547474	6.52024231	8.276308344
PHYHD1	284.8980978	2.012600549	0.672977472	2.990591263	0.002784379	0.007317551	3.78365433	4.381301294	0.621258471	0.627875185	1.005532789
RPLP0P2	85.68453707	2.011797944	0.484170728	4.155141624	3.25E-05	0.000136027	3.388838226	3.808046919	3.631972599	0.965961824	1.044207128
ZNF878	218.1786318	2.006828419	0.383318091	5.235412746	1.65E-07	1.14E-06	9.475586497	10.64615268	10.37023755	1.690433191	4.099479834
AL138756.1	37.2364288	2.006370001	0.783219634	2.561695232	0.010416268	0.023416367	3.553344936	3.562366473	3.297448807	0.965961824	0.966858451
CROT	596.6721028	2.002266469	0.672716108	2.976391445	0.002916623	0.007632469	165.0331315	52.57561553	44.58724256	25.69458451	22.50846475
CBFA2T3	17.99156937	1.999114428	0.863230896	2.315851342	0.020566387	0.042486204	0.789632208	1.187455491	1.624829847	0	0.696138085
TDRD7	172.4117644	1.996439693	0.831464835	2.401111397	0.01634536	0.034869786	7.172492557	11.71076794	8.171938347	0.772769459	4.563571891
MTHFD2	7599.060116	1.996431441	0.521231055	3.830223511	0.000128027	0.000463081	180.9244797	409.3855172	363.3406272	84.56995766	94.48140787
CTSB	23796.14406	1.994713622	0.514474417	3.877187194	0.000105671	0.000389573	1510.270302	1919.501328	2598.246292	665.0647156	446.9979993
SLC25A16	558.269057	1.993680642	0.425655239	4.683792094	2.82E-06	1.50E-05	19.41179178	21.82461299	29.48588281	5.457684304	8.005587978
PUS1	292.8903942	1.993089233	0.360629308	5.526697877	3.26E-08	2.60E-07	18.02993542	18.05751281	20.07142752	3.912145386	6.806683498
FOXO3	479.2823124	1.986916436	0.278176684	7.142641882	9.16E-13	1.61E-11	33.36196079	42.70745093	32.49659694	7.582800316	13.18794928
PRR5	100.1298284	1.986624524	0.475414564	4.178720376	2.93E-05	0.000124105	13.1605368	15.5597616	15.86598556	5.119597665	3.132621383
ZBTB7A	125.5215937	1.983403901	0.354024788	5.602443577	2.11E-08	1.75E-07	8.554348921	10.56425919	12.23401296	2.318308377	3.674062115
SLC25A39	4923.951512	1.982220521	0.304763743	6.504121845	7.81E-11	9.68E-10	251.8926744	304.6028068	306.3282152	89.78615151	71.43150239
ELL	320.8578749	1.981164913	0.334732875	5.91864457	3.25E-09	3.08E-08	15.23332135	16.46058991	19.40237994	3.187674018	6.690660484
PDZD2	218.102344	1.979133964	0.597811543	3.310631899	0.000930856	0.002747029	16.12165758	7.779880802	12.47295853	4.878107209	1.779019551
BNIPL	103.0434747	1.977327027	0.646352447	3.059208694	0.002219225	0.005980355	3.323035542	5.896330713	3.440816146	0.917663732	1.508299184
NMRAL1	1687.159873	1.977144418	0.318123831	6.215015119	5.13E-10	5.52E-09	56.1625908	80.74697338	81.28928146	18.93285174	22.70183644
AL365436.1	24.18988054	1.976237158	0.794300444	2.488022226	0.01284557	0.02824915	1.15154697	1.719763125	2.485033883	0.338086638	0.696138085
SRM	720.5797578	1.972919697	0.336424673	5.864372789	4.51E-09	4.18E-08	64.12471556	60.47833655	42.14999779	16.37305291	15.08299184
ALAS1	6907.46068	1.967223907	0.374115172	5.258337682	1.45E-07	1.02E-06	409.6546093	450.045631	609.5979273	138.6155217	142.4762614
GPT2	683.3671353	1.96435852	0.469234453	4.186304968	2.84E-05	0.000120554	23.45865685	44.09964013	64.61088097	7.389607951	18.91175131
PTBP3	2030.384507	1.963728412	0.29236643	6.716668562	1.86E-11	2.60E-10	137.3960042	149.7831788	122.053395	47.81511027	28.6576845
SYNGR2	1774.110422	1.963456151	0.311660141	6.299991227	2.98E-10	3.34E-09	97.65118306	116.7391588	77.41836329	32.11823064	22.70183644
SLC4A2	370.9844224	1.960102351	0.32240832	6.079565039	1.21E-09	1.22E-08	33.46066482	25.59171317	38.42244697	9.466425872	9.243166796
RPL34P6	24.65241832	1.957995461	0.538759771	3.634264411	0.000278775	0.000931818	2.13858723	2.211124018	2.676190336	0.434682821	0.928184113
TES	3182.49035	1.957541672	0.546759327	3.580262057	0.00034325	0.001124402	188.2943803	311.85038	260.3550884	115.2875437	22.62448776
ZNF217	883.5106903	1.956307173	0.319352491	6.125855364	9.02E-10	9.33E-09	38.92228759	65.55573245	60.88333014	13.42686935	18.75705396
AL158206.1	2194.031095	1.95600257	0.336369367	5.815043711	6.06E-09	5.50E-08	108.2783165	101.6298113	125.1596873	20.96137157	45.48102155
PDE2A	86.08108584	1.955543623	0.715552151	2.73291558	0.006277642	0.01496048	1.019941602	3.07100558	1.863775413	0.241490456	0.928184113
XYLB	292.437291	1.952517883	0.379803042	5.140869515	2.73E-07	1.81E-06	47.9372553	44.09964013	27.86105296	9.321531598	14.03878471
CYSTM1	2564.842236	1.952343303	0.418509312	4.664993693	3.09E-06	1.63E-05	279.4310976	384.1623247	336.0052545	105.917714	84.58077733
CCDC51	1425.065028	1.951697433	0.237826381	8.206395894	2.28E-16	6.77E-15	147.6283216	133.5273226	99.6403009	33.22908673	40.49203195
MOCOS	174.7370082	1.950218379	0.823056242	2.369483736	0.017812938	0.037577609	2.928219438	2.333964241	8.554251253	0.096596182	2.78455234
RNF207	185.2507548	1.948169547	0.445425743	4.373724635	1.22E-05	5.67E-05	21.08976022	11.4650875	18.49438679	3.960443477	6.071871075
OSTF1	1929.735977	1.946915638	0.721864787	2.69706415	0.006995379	0.016418999	172.7649469	129.0641278	125.6375785	70.80500167	6.149219751
USP18	118.6875151	1.94521702	0.684654618	2.841165411	0.004494899	0.011155213	2.533403334	3.521419732	2.246088318	0.724471368	0.889509775
AC027702.1	34.87359743	1.945179627	0.82814532	2.348838518	0.018832072	0.039349723	0.296112078	1.023668527	1.290306055	0.386384729	0.116023014
TPCN2	348.484861	1.942499946	0.337920393	5.748395151	9.01E-09	7.94E-08	24.51149979	38.24425615	20.93163156	7.148117495	9.165818119
PLP2	530.8397169	1.940664846	0.796440231	2.436673551	0.014823054	0.032029781	51.19448816	63.13987472	37.37108648	26.32245969	0.850835437
PLEKHH3	67.10958878	1.940040641	0.53867111	3.60153089	0.000316349	0.001043696	7.238295241	7.165679686	7.550679877	2.414904559	1.817693889
TMCO3	698.5129933	1.93993148	0.48163645	4.02779208	5.63E-05	0.000222468	69.75084505	74.44117526	31.11071266	22.55520858	10.24869959
MFSD6	54.77297334	1.93663048	0.704996409	2.747007583	0.006014174	0.014407068	4.60618788	7.779880802	8.076360121	2.752991197	1.121555804
LONP1	1138.02841	1.935758847	0.332710204	5.818152934	5.95E-09	5.41E-08	69.42183163	92.53963481	82.19727461	27.14352724	19.80126109
CAB39L	452.7935154	1.934500382	0.293014794	6.602057043	4.05E-11	5.33E-10	58.89340219	55.68756785	61.26564305	15.84177391	18.67970528
ZNF292	2746.137876	1.930482433	0.392134726	4.923008103	8.52E-07	5.07E-06	127.755911	166.9398633	221.1202265	29.0271528	76.07242296
MCCC2	914.4040373	1.930101597	0.48647714	3.967507283	7.26E-05	0.000279634	65.50657193	87.33939869	67.14370397	33.32568292	7.464147245
CCDC9	150.9676494	1.930054258	0.426872431	4.521384189	6.14E-06	3.05E-05	6.580268401	4.176567589	8.936564158	1.835327465	2.049739917
CNOT11	376.2526169	1.927081104	0.321193758	5.999746435	1.98E-09	1.94E-08	21.97809646	31.44709714	26.85748159	7.003223221	8.856423415
CEBPG	994.1093866	1.926863106	0.378078753	5.096459646	3.46E-07	2.24E-06	46.22638551	73.70413392	78.37414555	10.09430106	30.47537839
AC092171.2	371.2305864	1.926834944	0.351154684	5.487140091	4.08E-08	3.19E-07	27.63712728	28.99029267	33.02227718	9.852810601	7.580170259
RAP1GAP	125.2865669	1.926625065	0.687023135	2.804308862	0.005042458	0.012335669	7.764716713	3.930887142	9.796768194	0.434682821	4.060805496
TMUB1	30.82075554	1.926605692	0.522971323	3.68396049	0.000229638	0.000783733	2.401797966	2.661538169	2.676190336	0.676173277	0.850835437
HIST1H2AL	24.75682822	1.926028823	0.685152801	2.811093847	0.004937338	0.012108625	1.80957381	1.310295714	1.624829847	0.434682821	0.502766395
RPS6KA1	417.8380147	1.924643645	0.378354995	5.086872566	3.64E-07	2.35E-06	16.61517771	31.65183084	29.96377394	7.679396498	7.696193273
ABCA4	40.25884458	1.923006935	0.6031518	3.188263613	0.0014313	0.004047805	2.237291256	2.374910982	1.433673394	0.869365641	0.309394704
MIGA1	530.5963233	1.922618998	0.312694921	6.148545663	7.82E-10	8.19E-09	42.27822447	37.87573549	28.53010055	9.611320145	11.87302178
PODXL	3030.38411	1.922470806	0.581198767	3.307768208	0.000940426	0.002772237	68.27028466	23.54437611	19.16343437	4.298530115	18.56368227
DNASE2	1741.582508	1.91857066	0.345402804	5.554589125	2.78E-08	2.25E-07	68.99411418	104.5779767	101.360709	18.20838038	37.59145659
SHISA5	9508.420527	1.918542794	0.372660637	5.148230325	2.63E-07	1.74E-06	963.0880831	754.1570769	658.6773465	309.4941683	143.3657712
FAM129B	370.3603608	1.918035415	0.806482659	2.378272358	0.017393973	0.036792929	26.61718568	25.30508598	36.46309333	14.92411018	1.430950508
IRF7	278.3901947	1.917744618	0.495776083	3.868166865	0.000109657	0.000403158	2.566304676	3.030058839	3.440816146	0.531279003	1.276253156
CTSV	7746.405771	1.917682351	0.515062099	3.723206105	0.000196709	0.000682278	99.75686895	213.9467221	119.3294155	21.44435248	67.52539425
RIPK2	866.3934707	1.914130632	0.237647906	8.054481376	7.98E-16	2.23E-14	57.87346058	67.31644231	71.34914592	18.44987083	20.61342218
PMEL	4655.992748	1.912099923	0.695629647	2.74873265	0.005982616	0.014338012	676.9122104	1128.942598	326.3996428	69.45265512	375.1024048
MCRIP2	50.44823601	1.911106954	0.58216073	3.282782322	0.00102788	0.003004228	1.381856364	1.515029419	2.962925015	0.772769459	0.386743381
TRAF4	711.3618134	1.90807589	0.405338885	4.707359595	2.51E-06	1.35E-05	40.30414395	38.69467031	47.16785467	13.90985026	10.94483767
FBXO2	43.86610105	1.907064186	0.786391066	2.425083737	0.015304856	0.032955027	0.723829524	4.21751433	1.481462507	0.579577094	0.696138085
SERPINB1	1263.897255	1.905937953	0.639774523	2.979077607	0.002891175	0.007573935	58.95920487	71.82058383	53.28486115	28.15778716	6.535963132
TM7SF3	639.398967	1.90527394	0.292124741	6.522124543	6.93E-11	8.70E-10	89.98517038	85.04638119	85.11241051	25.59798833	26.18252686
RERG	179.3828952	1.905136819	0.765932252	2.487343774	0.012870097	0.028298868	16.450671	19.36780852	15.05357064	7.437906042	2.243111607
GPRC5C	716.422565	1.904566919	0.661507865	2.879129665	0.003987743	0.010046989	38.0668527	19.65443571	40.85969174	16.421351	2.088414255
HEXIM1	836.6963523	1.904353021	0.389088555	4.894394857	9.86E-07	5.78E-06	50.10874387	44.38626731	75.17227497	14.53772545	19.80126109
TIGAR	2482.215686	1.904099058	0.358769939	5.307298225	1.11E-07	7.97E-07	203.1986882	150.8477941	156.0792435	56.02578577	44.43681443
AL365205.1	35.60350894	1.901685904	0.458496282	4.147658284	3.36E-05	0.000140033	5.856438877	4.954555669	4.970067767	1.6421351	1.508299184
AAK1	1862.74281	1.900672099	0.513915263	3.698415354	0.00021695	0.000744736	182.7011521	168.413946	186.0430175	68.96967421	35.38701932
GARS	5469.364506	1.89997815	0.387957183	4.897391351	9.71E-07	5.71E-06	209.1538311	417.3701317	422.9814404	119.199689	88.06146776
RBM42	354.6659455	1.898024423	0.4250254	4.465672924	7.98E-06	3.85E-05	20.03691728	33.0030733	29.15135902	7.969185045	8.508354372
TAF5L	254.8058012	1.897422428	0.417276901	4.547154238	5.44E-06	2.73E-05	13.62115559	19.81822268	20.16700575	4.926405301	5.878499385
MED13	951.3861403	1.894628837	0.294485576	6.433689763	1.25E-10	1.50E-09	65.44076924	76.85703298	118.2302659	18.40157274	35.38701932
AKR7L	15.35642017	1.892814436	0.791247248	2.392190863	0.01674813	0.035631134	1.283152338	1.515029419	2.532822997	0.144894274	0.966858451
PGPEP1	986.8868512	1.889577737	0.647237062	2.919452311	0.00350647	0.0089599	80.50958388	112.5216444	94.95696782	46.94574463	7.580170259
AC012435.1	51.56223568	1.88949203	0.683598963	2.764035835	0.005709127	0.013767973	1.677968442	0.532307634	1.624829847	0.241490456	0.541440733
CLPB	587.3648977	1.888760428	0.281765199	6.703313383	2.04E-11	2.83E-10	65.76978266	50.44638499	54.5273781	20.91307348	12.83988023
LYNX1	35.50063196	1.88785996	0.611749055	3.086003884	0.002028662	0.00552638	4.474582512	4.749821964	2.915135902	1.448942735	0.966858451
ZDHHC12	1873.630338	1.886559883	0.249490111	7.561661961	3.98E-14	8.61E-13	163.4538671	130.9476779	108.5768651	42.79210879	37.82350262
CPEB4	843.0845652	1.884954035	0.2891197	6.519631949	7.05E-11	8.83E-10	80.11476778	45.94224348	62.50815999	18.01518801	20.2266788
SESN2	1479.208517	1.884237874	0.447220823	4.213215879	2.52E-05	0.000108325	66.09879608	114.5280348	125.1596873	31.53865354	30.20465802
RINL	155.246022	1.883700082	0.499315667	3.772563544	0.000161579	0.000570729	9.738797233	11.09656683	9.032142384	4.636616753	1.160230142
ZNF702P	1085.106369	1.881805814	0.4093596	4.596950494	4.29E-06	2.20E-05	63.79570214	59.1270941	78.42193467	20.67158303	20.07198145
RHPN2	444.4414859	1.878771106	0.476811587	3.940279885	8.14E-05	0.000309479	41.02797348	56.50650267	31.77976024	5.457684304	21.96702402
ADK	3365.028521	1.878649776	0.228349228	8.227090565	1.92E-16	5.74E-15	488.5520274	401.5237429	367.1159672	104.4204731	153.9625398
AC008957.3	18.33553669	1.878537813	0.818001672	2.2964963	0.02164752	0.044413147	3.487542252	1.678816384	1.911564526	0.531279003	0.928184113
PTPRF	8657.81814	1.877456019	0.471368926	3.982986391	6.81E-05	0.000264092	310.062247	251.4129901	265.8986255	39.79762713	136.0176469
DNM2	745.662933	1.877150578	0.472518581	3.972649233	7.11E-05	0.00027438	30.43374135	46.14697718	37.70561027	11.39834952	11.79567311
ETNK2	76.86615694	1.876284147	0.480980576	3.900956171	9.58E-05	0.000356708	6.218353639	7.902721026	5.209013333	1.014259915	3.016598368
OSGIN2	235.8556137	1.872698944	0.33315678	5.621074094	1.90E-08	1.58E-07	12.73281936	12.85727669	13.95442104	4.250232024	3.79008513
MFSD13A	1086.823581	1.869485314	0.537390203	3.47882284	0.000503621	0.001588794	74.15962487	68.70863151	135.4821358	18.0634861	40.956124
GRK3	610.6288458	1.86428535	0.469914729	3.967284355	7.27E-05	0.000279823	33.29615811	37.87573549	57.96819424	5.216193848	22.74051078
ESYT2	637.7295549	1.863541979	0.634525636	2.936905735	0.003315049	0.008545964	44.61421976	54.41821888	50.60867082	19.27093838	10.63544297
MTMR10	635.4689039	1.862948899	0.418082951	4.455931277	8.35E-06	4.01E-05	26.38687629	26.20591428	38.85254899	9.997704875	8.701726063
STAG3	117.774785	1.862900831	0.516188261	3.608956212	0.000307431	0.001017462	9.179474419	8.926389552	5.304591559	1.400644644	3.519364763
FREM2	344.6577624	1.862118755	0.596674974	3.120825974	0.001803446	0.004984944	13.85146498	29.1131329	14.28894483	3.960443477	8.044262316
NSUN7	236.1579972	1.861176834	0.496924597	3.745390838	0.000180113	0.000630759	8.356940869	15.64165509	9.223298837	4.878107209	1.701670874
HSPB1	1730.010314	1.861056286	0.551542758	3.374273818	0.000740107	0.002242205	106.0410253	115.0193957	144.7054346	59.26175788	11.91169612
SEMA6A-AS1	60.59040817	1.85898421	0.55002021	3.379847095	0.000725262	0.002201751	3.684950304	3.603313214	2.58061211	0.917663732	1.121555804
LINC-PINT	36.74569482	1.857041949	0.787003816	2.359635255	0.018292911	0.038419019	0.690928182	1.678816384	3.058503241	0.579577094	0.541440733
GTPBP3	283.5345144	1.855375327	0.342038393	5.424465105	5.81E-08	4.39E-07	30.20343196	19.53159549	20.50152954	5.31279003	9.436538486
TALDO1	17552.65028	1.853669073	0.236225099	7.847045391	4.26E-15	1.06E-13	1239.426455	1391.001741	1193.963203	381.4100261	408.0529408
C1GALT1	1038.750546	1.85065726	0.346612174	5.339273683	9.33E-08	6.77E-07	71.56041886	71.32922294	73.83417981	25.64628642	18.56368227
SYDE1	263.2458137	1.849821925	0.537371329	3.442353223	0.000576677	0.001792351	10.36392273	5.896330713	13.18979523	3.67065493	2.359134621
ZNF611	764.9226718	1.849374114	0.363912573	5.081918716	3.74E-07	2.41E-06	61.62421357	54.95052651	57.34693577	10.72217624	26.49192157
CBX4	44.91323991	1.848407036	0.806738062	2.291210893	0.021951219	0.044905765	2.665008702	4.62698174	7.311734311	0.724471368	2.436483298
NEDD4	815.4128657	1.847993991	0.575797815	3.20944947	0.001329894	0.003785695	50.43775729	63.30366169	58.63724183	17.04922619	18.75705396
MISP3	49.55969015	1.846811239	0.715446939	2.581339214	0.009841782	0.022267391	3.750752988	1.637869643	5.973639143	1.448942735	0.889509775
ARRDC1	307.7654827	1.844244485	0.362632431	5.085713051	3.66E-07	2.36E-06	21.68198438	22.15218692	22.79540697	3.622356839	10.71279164
TANC2	524.6277443	1.843490508	0.478056942	3.856215329	0.000115156	0.000422051	43.56137681	58.75857343	56.82125553	11.35005143	22.62448776
VPS37C	366.4497483	1.84292747	0.260740601	7.068049482	1.57E-12	2.65E-11	29.54540512	30.83289602	29.62925015	7.582800316	11.37025539
HIST1H1D	214.6225995	1.840974931	0.596169037	3.088008297	0.002015028	0.005493298	32.04590711	11.21940705	12.42516942	5.554280486	6.033196737
TAF13	1928.044718	1.84067498	0.280598009	6.559829077	5.39E-11	6.93E-10	117.9513111	102.0392787	91.89846457	36.56165502	27.49745436
ATF4	5950.76307	1.839289043	0.413794195	4.444936796	8.79E-06	4.19E-05	197.8028681	518.3447951	402.097598	111.5685906	122.0948852
PAXIP1-AS2	36.96498632	1.83901894	0.594389166	3.093964433	0.001975012	0.005396767	2.566304676	3.316686026	1.529251621	0.482980912	1.082881466
PTPRM	421.1523363	1.83868589	0.542619506	3.388536297	0.000702667	0.002139763	43.26526473	36.23786584	40.62074617	18.11178419	5.917173723
SLC1A4	171.0588111	1.836092638	0.766929708	2.394082038	0.016662022	0.035468398	12.56831265	37.13869415	12.61632587	3.863847295	9.513887162
TMEM41B	3465.941627	1.833804771	0.279917318	6.551237283	5.71E-11	7.30E-10	130.3880184	180.2066074	145.9479515	36.36846266	60.95075678
KIFC3	167.0382113	1.832466492	0.638625264	2.869392422	0.004112612	0.010324567	15.99005221	13.9628387	13.33316257	6.906627039	1.740345213
LRRC69	42.03892905	1.831431893	0.520991979	3.515278479	0.000439293	0.001405014	1.97408052	2.047337053	1.433673394	0.531279003	0.618789409
SIK3	256.5086499	1.831083613	0.264647412	6.918955294	4.55E-12	7.03E-11	22.47161659	23.42153589	30.48945419	6.327049945	9.939304881
AL355877.1	81.372104	1.830637115	0.706896755	2.589681027	0.00960649	0.021797914	0.361914762	2.252070759	1.863775413	0.289788547	0.657463747
CORO7	112.9481155	1.830419879	0.438561431	4.173690955	3.00E-05	0.000126374	10.2652187	13.79905174	12.80748232	3.525760656	4.254177186
SYNGR3	90.29134409	1.829184291	0.685324985	2.669075739	0.00760603	0.017703007	0.690928182	1.965443571	5.113435106	0.724471368	0.928184113
RPL23AP64	31.96806286	1.826978194	0.511034917	3.575055506	0.000350154	0.00114473	2.730811386	2.907218616	2.58061211	0.917663732	0.812161099
ATG2B	298.083801	1.824682673	0.396690913	4.59975919	4.23E-06	2.17E-05	14.14757706	31.48804388	37.56224293	6.423646127	11.52495274
NEB	97.22448128	1.82453371	0.478672504	3.811653466	0.00013804	0.000495655	2.368896624	2.620591428	2.485033883	0.579577094	1.005532789
MAML3	248.9204828	1.824394415	0.641538846	2.84377856	0.004458202	0.011079049	12.93022741	17.40236495	27.43095094	2.414904559	10.44207128
SLC44A3	68.81856299	1.823902927	0.636104441	2.867301044	0.00413989	0.010382447	7.731815371	7.534200356	5.447958898	2.656395015	1.624322198
USP27X	30.72371592	1.823851861	0.717337967	2.542527992	0.011005379	0.024624409	1.31605368	1.433135937	4.062074617	0.676173277	0.773486761
CNNM4	301.3151125	1.822746114	0.415504752	4.386823751	1.15E-05	5.37E-05	17.53641529	31.03762973	19.59353639	4.201933933	10.59676863
CGN	354.2522358	1.822239667	0.425707726	4.280494705	1.86E-05	8.27E-05	18.55635689	37.09774741	21.98299205	7.920886954	8.431005696
AL080317.1	41.07168146	1.821376051	0.467931656	3.892397596	9.93E-05	0.000368325	3.816555672	3.84899366	1.959353639	0.772769459	1.276253156
KLB	48.35839914	1.82065173	0.642974953	2.83160599	0.004631488	0.011438396	1.381856364	1.801656607	1.385884281	0.241490456	0.734812423
AL031587.5	18.65898009	1.820204956	0.722800615	2.518267028	0.011793387	0.026181107	0.921237576	1.310295714	1.529251621	0.482980912	0.309394704
DNMT3B	2994.031302	1.819949063	0.655137935	2.777963181	0.005470082	0.013245624	82.28625635	68.09443039	67.23928219	12.31601325	35.50304234
YRDC	165.4859357	1.819662783	0.386418859	4.709042382	2.49E-06	1.34E-05	10.52842944	7.493253615	9.653400855	2.366606468	3.558039101
LINC02035	214.4041559	1.818500157	0.623227451	2.917875575	0.003524249	0.008999096	4.44168117	11.38319402	15.72261822	1.738731283	5.221035638
ZDHHC14	79.29518934	1.815886517	0.738025132	2.460467046	0.013875631	0.030230518	13.52245156	8.885442811	12.13843474	1.400644644	6.303917103
NCOR2	401.6782045	1.815581986	0.416996155	4.353953781	1.34E-05	6.15E-05	17.00999382	18.79455415	24.08571302	7.003223221	5.607779018
AC010487.1	22.97006576	1.815092814	0.771970023	2.351247796	0.018710569	0.039151288	0.789632208	1.719763125	1.720408073	0.289788547	0.618789409
DAB2	9340.942687	1.814847744	0.6990403	2.596199024	0.009426145	0.021432168	253.5048401	200.9256584	385.9926669	146.2466201	22.00569835
GAN	1591.612375	1.814732905	0.380616674	4.767875472	1.86E-06	1.03E-05	101.1387253	147.1216406	151.0613866	29.65502799	57.315369
PLCG2	124.0790782	1.811282977	0.605149235	2.993117848	0.002761431	0.007266301	3.915259698	4.299407812	10.80033957	2.46320265	1.546973522
TMEM184B	741.9936266	1.809839338	0.277172903	6.529640229	6.59E-11	8.32E-10	36.88240439	41.27431499	46.30765064	13.23367698	13.26529795
AL357060.2	59.87165644	1.808490336	0.774088888	2.336282517	0.019476522	0.040564174	2.039883204	0.859881562	2.293877431	0.676173277	0.425417719
PURA	505.7619069	1.808079347	0.386710858	4.675532921	2.93E-06	1.56E-05	34.51350776	35.45987776	34.98163082	13.37857126	8.585703049
TRIM6	723.9709851	1.806406215	0.437754329	4.12652964	3.68E-05	0.000151988	52.47764049	47.74390008	43.01020183	13.62006171	17.13273176
PI4KA	832.9571239	1.80374871	0.412118436	4.376772672	1.20E-05	5.60E-05	38.49457014	61.17443115	71.97040439	21.87903531	14.2321564
DUS3L	194.6414347	1.803306685	0.585698947	3.078896925	0.002077686	0.005642218	5.165510694	8.680709106	14.57567951	2.84958738	3.287318735
TNFAIP8	1019.326045	1.802778044	0.349887602	5.152449055	2.57E-07	1.71E-06	73.76480877	83.24472459	72.49608464	27.86799861	20.49739917
N4BP3	158.8969169	1.801752381	0.694910757	2.5927824	0.009520298	0.021622919	1.31605368	1.719763125	4.444387522	0.869365641	0.734812423
PAXX	795.6483364	1.80134059	0.273740706	6.580463017	4.69E-11	6.11E-10	78.23939128	73.29466651	73.64302335	17.91859183	31.24886515
PIP5K1C	264.473665	1.799989002	0.471839808	3.814830737	0.000136276	0.000490156	15.13461732	20.18674335	25.71054287	7.293011769	5.685127694
AC004837.2	12.74310463	1.79650397	0.705976694	2.544707191	0.010936941	0.024486134	1.052842944	1.760709866	1.099149602	0.193192365	0.657463747
CMTM8	43.1249394	1.794739245	0.532396985	3.371054484	0.00074881	0.002266246	3.224331516	5.241182856	4.635543975	0.724471368	2.165762931
SLC35E1	1305.114544	1.793749304	0.319515383	5.613968526	1.98E-08	1.65E-07	77.74587115	90.98365865	97.20305613	33.51887528	22.81785945
YBX3	1031.76588	1.793338491	0.366739815	4.889947632	1.01E-06	5.90E-06	62.38094444	55.4418874	53.28486115	15.11730254	22.19907004
ATP6V1E1	3621.47159	1.792297328	0.37570896	4.770440733	1.84E-06	1.02E-05	261.2366555	264.1883734	259.351517	105.386435	59.44245759
NAGK	2810.919795	1.791164238	0.317793895	5.636244949	1.74E-08	1.46E-07	203.0341815	237.4910982	183.8925074	77.47013826	54.76286269
CLIP1	2471.089827	1.789947454	0.330589123	5.414417265	6.15E-08	4.62E-07	121.7349654	108.795491	132.0891087	33.27738482	45.98378795
AL122020.1	86.01767789	1.78904199	0.560316826	3.192911414	0.001408461	0.0039924	4.11266775	5.978224196	3.966496391	0.482980912	2.668529326
WEE1	1604.073993	1.7872621	0.339583653	5.263098158	1.42E-07	9.92E-07	69.61923968	95.36495994	105.8528856	21.00966966	39.0224071
PTPN14	1961.163823	1.785933072	0.316578201	5.641364643	1.69E-08	1.42E-07	142.7260216	181.8854238	182.0765211	71.72266541	34.72955558
NEK6	286.9810562	1.785073497	0.466737005	3.824581034	0.000130995	0.000473004	32.73683529	36.27881258	22.84319608	11.63983997	7.850890626
PAPLN	86.87198307	1.781676688	0.670503395	2.657222471	0.007878743	0.018294456	5.724833509	4.99550241	3.679761712	0.482980912	2.78455234
PTPMT1	167.9664439	1.78085368	0.334259342	5.327760381	9.94E-08	7.19E-07	10.69293615	7.902721026	7.885203669	2.897885471	2.861901016
LIMK2	1873.304017	1.779373606	0.198033236	8.985227148	2.58E-19	1.16E-17	128.4797405	154.4511073	140.8345164	38.49357867	54.72418835
ANO7	146.5412179	1.77883583	0.304601642	5.839876038	5.22E-09	4.78E-08	9.738797233	9.335856963	10.03571376	1.883625556	4.563571891
PIM1	444.6737151	1.77552494	0.39772878	4.464160079	8.04E-06	3.87E-05	7.172492557	10.35952549	11.61275449	2.704693106	3.712736453
WNT4	30.69257559	1.773549962	0.781494325	2.269434218	0.023241933	0.047122645	2.500501992	4.463194776	2.628401223	0.531279003	1.624322198
TMPPE	78.96086046	1.771882011	0.639290349	2.771638916	0.005577487	0.013472534	6.909281821	4.749821964	2.867346789	2.46320265	0.580115071
RAB15	1260.569631	1.768238636	0.430441195	4.107967953	3.99E-05	0.00016327	45.79866807	52.65750901	48.64931718	21.10626585	10.17135091
TMCC3	184.6185997	1.768233344	0.420967792	4.200400545	2.66E-05	0.000114077	12.89732607	15.80544205	8.984353271	3.139375927	5.221035638
TBC1D3L	19.2269202	1.767891135	0.525553192	3.363867185	0.000768585	0.002319907	1.217349654	2.088283794	2.150510091	0.386384729	0.812161099
TRAF3IP2	762.6485149	1.764217496	0.620059704	2.845238105	0.004437824	0.011037702	30.03892525	38.85845727	34.69489614	18.98114983	2.359134621
MT-TT	49.89125555	1.762012904	0.497124844	3.544407254	0.000393497	0.001273728	2.566304676	2.784378392	3.201870581	0.627875185	1.276253156
GPR171	13.13887034	1.759535421	0.73653388	2.388940236	0.016897051	0.035875534	1.348955022	1.351242455	1.481462507	0.096596182	0.850835437
BNIP3	2232.798095	1.758805206	0.442109169	3.978214727	6.94E-05	0.000268811	66.88842829	145.6885047	102.4598586	34.24334665	35.07762462
ITPRIPL2	259.8763101	1.756362446	0.619793091	2.833788359	0.004599979	0.011377717	16.02295356	19.44970201	13.71547547	7.389607951	3.093947045
KLF8	510.3591124	1.753362188	0.66318158	2.643864428	0.008196548	0.018960782	29.2163917	23.50342937	18.39880856	10.3840896	4.834292257
ELL3	24.31815382	1.753113061	0.707457834	2.478046008	0.013210411	0.028960833	1.48056039	1.678816384	2.102720978	0.193192365	1.005532789
SERTAD4	111.8284011	1.751643266	0.387442531	4.52104022	6.15E-06	3.05E-05	15.72684148	13.30769085	12.23401296	4.298530115	4.872966595
TGFBR3	1998.36441	1.751571323	0.437459301	4.003964072	6.23E-05	0.000243773	99.75686895	154.3692138	144.2753326	56.31557432	29.62454295
ZNF321P	69.67323212	1.751077743	0.37949951	4.614176552	3.95E-06	2.04E-05	3.750752988	5.896330713	6.260373822	1.062558006	2.513831974
MCOLN1	416.9446764	1.749426541	0.516094648	3.389739749	0.00069959	0.002131272	28.78867425	43.60827923	34.98163082	12.75069607	10.86748899
NOD1	118.5369141	1.748423939	0.418375916	4.179074067	2.93E-05	0.000123952	7.534407319	6.879052499	3.966496391	1.6421351	2.475157636
CARS	4669.03366	1.747474119	0.47211563	3.701368917	0.000214439	0.00073732	205.6333875	407.5838606	344.3205602	124.1260943	85.00619505
MKNK2	777.2415989	1.747189589	0.38637084	4.522053443	6.12E-06	3.04E-05	19.41179178	37.13869415	45.30407926	11.78473425	10.82881466
AC010463.3	25.82710622	1.746864244	0.576145295	3.031985614	0.002429508	0.006486309	2.204389914	2.129230535	2.102720978	0.627875185	0.812161099
OR7E38P	34.33393728	1.744298281	0.487898147	3.575127908	0.000350057	0.001144667	2.204389914	2.252070759	2.485033883	0.965961824	0.580115071
PNPLA6	304.9053723	1.743281641	0.420398622	4.146734906	3.37E-05	0.000140476	16.64807905	29.03123942	24.65918238	8.838550686	6.651986146
ATP6AP1	3363.278119	1.743074181	0.544552781	3.200927884	0.001369858	0.003894198	174.6403234	220.5391474	248.4078101	78.3395039	63.89000647
DDX59	586.8208677	1.7394401	0.319709791	5.440684479	5.31E-08	4.03E-07	28.62416754	37.30248111	43.01020183	10.04600297	14.65757412
MFSD4B	267.2993152	1.737032928	0.365798728	4.748602978	2.05E-06	1.12E-05	21.64908304	21.94745321	19.54574728	5.457684304	8.895097753
C19orf47	454.7033623	1.733734429	0.352967831	4.911876594	9.02E-07	5.34E-06	43.33106742	27.80283718	30.34608685	12.65409989	9.861956204
SLC35A3	210.1556651	1.732606469	0.342803216	5.054230495	4.32E-07	2.74E-06	21.05685888	16.17396272	13.71547547	3.2842702	8.469680034
AEBP2	2088.77806	1.730683246	0.301831717	5.733934335	9.81E-09	8.59E-08	186.8138199	222.5864844	224.6566209	61.3385758	82.84043212
LHX4	57.13555896	1.730460775	0.646228956	2.677782786	0.007411126	0.017290284	6.349959007	3.521419732	5.161224219	0.869365641	2.629854988
RFK	311.1003434	1.728665369	0.351306722	4.920672616	8.62E-07	5.12E-06	21.74778706	22.930175	29.58146104	6.810030857	10.17135091
MT-TP	274.4564744	1.727529775	0.40058513	4.312515985	1.61E-05	7.28E-05	18.7208636	14.12662567	17.92091743	5.988963307	5.414407328
SMIM13	280.6165818	1.725807415	0.257445853	6.703574351	2.03E-11	2.83E-10	19.64210118	21.49703906	25.56717553	7.872588863	7.154752541
SH2D5	129.553208	1.724879383	0.690790714	2.496963768	0.012526175	0.027624991	3.586246278	7.943667767	4.444387522	0.193192365	3.635387777
AC036214.2	23.08625226	1.724616462	0.744996926	2.314930979	0.02061671	0.042578238	1.80957381	0.859881562	1.768197186	0.144894274	0.889509775
TMEM79	166.9945589	1.724148931	0.592903908	2.90797363	0.00363779	0.009256977	11.38386433	14.37230611	16.67840049	2.076817921	7.96691364
AL591845.1	157.4476782	1.723515231	0.571051933	3.01814096	0.002543306	0.006758633	5.165510694	4.21751433	4.301020183	1.787029374	1.276253156
GRK6	195.9948435	1.723159412	0.445461437	3.868257199	0.000109616	0.000403109	16.35196698	18.67171393	13.47652991	6.375348036	4.408874538
YARS	6395.20774	1.722865145	0.352273775	4.890699418	1.00E-06	5.88E-06	327.2367476	520.8425464	470.4838189	159.8666818	135.7082522
HSPA1A	459.5813829	1.72257953	0.443208637	3.886610926	0.000101653	0.000376549	21.35297096	20.6371575	22.93877431	9.852810601	4.408874538
MDM2	3976.757647	1.721915937	0.424803123	4.05344463	5.05E-05	0.000201739	272.4231118	193.9647124	213.9996487	77.61503253	75.76302825
CCSER2	640.9392552	1.72161102	0.228766161	7.525636728	5.25E-14	1.11E-12	54.81363578	44.79573473	52.61581357	14.87581208	19.9172841
AKNA	173.6293292	1.720137407	0.46047134	3.735601456	0.000187267	0.000653486	3.717851646	7.206626427	8.506462139	1.545538918	2.939249692
RAD51	1057.926406	1.719673797	0.441687994	3.893413044	9.88E-05	0.000367062	84.39194224	71.77963709	57.39472488	33.22908673	13.30397229
RASSF3	366.4444054	1.718300472	0.509070361	3.37536931	0.000737167	0.002233757	27.3410152	24.48615116	30.87176709	13.90985026	4.060805496
NENF	113.0015207	1.714069729	0.310824304	5.514593632	3.50E-08	2.77E-07	12.33800325	17.15668451	14.00221015	4.10533775	5.878499385
PYY2	19.84047252	1.713904769	0.699771429	2.449235134	0.014315996	0.031056933	1.710869784	0.900828303	1.863775413	0.193192365	0.850835437
SNORD104	71.13585744	1.712580582	0.517052828	3.312196527	0.000925665	0.002734186	5.165510694	3.889940401	4.205441957	0.676173277	2.436483298
GSKIP	1992.942815	1.711846887	0.338291814	5.060266947	4.19E-07	2.65E-06	120.254405	205.8392673	183.0323033	53.36939076	63.27121706
AL080317.3	27.84976229	1.70983916	0.710589212	2.4062273	0.016118233	0.034445018	2.533403334	3.111952321	2.676190336	0.482980912	1.469624846
ELOVL4	356.1912155	1.708543745	0.369842556	4.619651568	3.84E-06	1.99E-05	42.7717446	54.78673955	48.07584782	18.20838038	14.69624846
PIK3C2A	1526.314494	1.707524871	0.237333353	7.194626674	6.26E-13	1.14E-11	108.8376393	108.2222366	135.4821358	42.1642336	38.09422299
PATJ	964.1723723	1.707339076	0.468878063	3.641328544	0.000271235	0.000909913	39.74482114	33.94484834	27.04863804	13.62006171	8.933772091
SFMBT1	455.7745636	1.707100679	0.390243697	4.374447796	1.22E-05	5.65E-05	49.84553313	27.92567741	35.88962397	9.611320145	16.90068573
MTMR14	425.4794064	1.706624479	0.342585116	4.981607199	6.31E-07	3.86E-06	23.32705148	22.02934669	16.7261896	6.13385758	8.16028533
MYPOP	40.26158633	1.706013336	0.459338215	3.714067934	0.000203954	0.00070486	1.908277836	2.70248491	3.536394373	0.676173277	1.19890448
ZNF28	1520.19333	1.705642329	0.377101818	4.523028659	6.10E-06	3.03E-05	67.84256721	73.70413392	101.0739743	23.71436277	32.60246698
E2F8	335.7399556	1.703210819	0.482330836	3.531208649	0.000413665	0.001331418	49.94423716	30.9147895	36.22414776	14.2479369	12.37578818
FUCA1	706.0901382	1.702787777	0.438279016	3.885168382	0.000102259	0.000378483	23.32705148	35.9921854	28.67346789	9.901108692	10.24869959
SLC44A3-AS1	64.93348037	1.702680461	0.632815708	2.690641904	0.00713147	0.016711834	4.079766408	5.200236115	4.396598409	2.366606468	0.657463747
CBLB	2907.920394	1.702182193	0.442975591	3.842609452	0.000121733	0.000442727	145.0620169	108.3860236	161.3838351	22.26542003	77.58072214
CALHM2	411.9926915	1.701654147	0.659312777	2.580951267	0.009852849	0.022282179	9.146573077	11.79266143	19.49795816	7.77599268	1.005532789
GNB1L	318.8546236	1.701400738	0.248510993	6.846380178	7.57E-12	1.13E-10	30.17053062	34.80472991	31.68418201	10.72217624	11.4862784
LYN	615.1397081	1.700195243	0.591842928	2.872713625	0.004069628	0.010223616	34.44770508	45.98319022	44.348297	18.30497656	9.591235838
MEIOC	47.27839789	1.697627225	0.61430421	2.763495996	0.005718579	0.013786262	1.546363074	5.937277454	2.723979449	0.724471368	1.662996536
TTC9	90.17085024	1.696206878	0.585986583	2.894617261	0.003796211	0.009616981	7.205393899	11.99739513	6.833843179	3.091077836	2.861901016
C9orf3	498.1965171	1.696057347	0.247744062	6.846006053	7.59E-12	1.13E-10	66.59231621	46.59739133	40.85969174	14.82751399	21.00016556
MOGS	945.7507197	1.694714459	0.286158085	5.922301507	3.17E-09	3.02E-08	72.11974167	62.36188664	66.04455436	19.99540975	26.68529326
SLC38A1	9676.463451	1.692785831	0.377986784	4.478425971	7.52E-06	3.66E-05	528.0336378	797.2739953	741.2091448	146.4881106	346.9474867
SLC25A19	635.1448636	1.691999109	0.359785211	4.702803384	2.57E-06	1.38E-05	36.1914762	28.08946437	25.71054287	6.471944218	14.88962015
DFNA5	784.1153466	1.691794794	0.489466287	3.456407194	0.000547428	0.001710451	42.11371776	63.42650191	67.04812574	11.78473425	29.54719428
SFXN4	1135.842142	1.691200193	0.2669252	6.335858104	2.36E-10	2.70E-09	83.27329661	73.25371977	74.93332941	23.03818949	30.97814478
KIF13A	264.2480723	1.690887338	0.399059655	4.237179369	2.26E-05	9.85E-05	21.08976022	14.20851915	20.69268599	5.554280486	7.541495921
MYO1E	1453.765047	1.69086229	0.340113528	4.971464386	6.64E-07	4.05E-06	58.202474	80.46034619	67.47822776	16.80773573	31.94500323
ERICH1	727.154216	1.690355289	0.419026149	4.034009082	5.48E-05	0.000217593	35.30313997	46.63833807	68.91190115	12.89559035	22.89520813
CAPN1	3743.301669	1.684731262	0.404589385	4.164052059	3.13E-05	0.000131382	306.015382	310.7038712	286.9736244	139.1950988	63.58061177
TMEM44	195.8316511	1.684706623	0.41017998	4.107237567	4.00E-05	0.000163741	10.8903442	10.19573853	20.97942067	4.057039659	5.878499385
CPPED1	1126.446413	1.684072296	0.393337419	4.281495263	1.86E-05	8.24E-05	95.2493851	49.66839691	100.8828178	32.21482682	24.32615864
PIDD1	187.4633194	1.683964426	0.392630168	4.288932856	1.80E-05	8.00E-05	22.24130719	14.53609308	18.82891058	5.650876668	7.386798569
GDPD5	650.6280997	1.683451836	0.488102378	3.448972824	0.000562723	0.001753415	28.92027962	33.94484834	54.86190189	19.36753456	7.077403864
THOP1	854.7053049	1.68333828	0.322854466	5.213922855	1.85E-07	1.27E-06	48.52947945	55.89230155	78.08741088	18.54646701	24.40350731
ALAD	1254.389352	1.682644328	0.347878346	4.836875725	1.32E-06	7.52E-06	147.7270256	123.0859036	99.83145736	41.29486796	44.78488347
UBALD1	70.57478691	1.682237584	0.636251627	2.643981585	0.008193711	0.018957193	1.283152338	1.842603348	2.819557675	0.869365641	0.502766395
DBNDD1	194.5803219	1.680712855	0.681262299	2.4670569	0.013622871	0.029772158	12.73281936	13.55337129	11.70833272	0.579577094	8.895097753
AL627171.2	19.39257271	1.677147434	0.587110624	2.856612306	0.004281885	0.010694926	2.237291256	2.825325134	2.532822997	1.062558006	0.696138085
PRKD2	526.296382	1.67649776	0.39112689	4.286327027	1.82E-05	8.08E-05	28.26225278	43.32165205	42.58009981	14.58602354	11.83434745
SCD	23107.81509	1.675763853	0.342391501	4.894291621	9.87E-07	5.78E-06	1614.633359	2536.323035	1902.102281	549.6322777	888.3882195
FZR1	187.1370318	1.675209522	0.332552391	5.037430398	4.72E-07	2.97E-06	11.94318715	15.88733553	18.49438679	5.216193848	5.646453356
AC093484.5	60.3562123	1.673256343	0.558467382	2.996157693	0.00273405	0.007204532	5.132609352	3.316686026	3.154081467	1.014259915	1.740345213
FTH1	1377.523041	1.672869396	0.566174282	2.954689836	0.003129835	0.008131289	72.54745912	103.4314679	97.53757992	43.17849352	18.67970528
AL591895.1	24.10488751	1.671626455	0.729310272	2.29206487	0.0219019	0.044861951	0.723829524	1.596922902	1.624829847	0.241490456	0.696138085
SLC45A4	87.94195841	1.670556041	0.457626458	3.65047958	0.000261751	0.000880701	7.567308661	6.264851383	5.686904464	1.497240827	3.171295721
PDE4A	316.9494462	1.66842205	0.471614302	3.537683324	0.000403654	0.001303475	15.4307294	23.95384352	16.77397871	5.071299574	8.314982682
TMC4	194.6274927	1.667765238	0.61903105	2.694154417	0.007056746	0.01654987	0.954138918	3.930887142	3.393027033	0.869365641	1.082881466
ANKDD1A	160.3764871	1.666869847	0.50492215	3.301241283	0.000962581	0.002830194	6.646071085	10.44141897	11.85170006	3.235972109	3.596713439
TYRO3	849.738805	1.665930355	0.421442828	3.952921357	7.72E-05	0.000295627	56.88642032	33.0030733	52.04234421	12.79899416	21.27088593
C11orf45	86.31400681	1.662346237	0.686139868	2.42275127	0.015403469	0.033128686	13.68695827	9.376803704	4.492176635	3.67065493	2.707203664
PDGFRL	300.6352637	1.661948705	0.620995399	2.676265729	0.007444759	0.017363259	16.22036161	47.12969897	27.6221074	5.602578577	16.6686397
C1orf132	28.8838858	1.661024481	0.645189303	2.574476163	0.0100392	0.022644605	2.171488572	3.521419732	4.396598409	0.772769459	1.662996536
NECTIN3	566.4043154	1.659236452	0.387544309	4.281410966	1.86E-05	8.24E-05	40.04093322	52.86224272	63.94183339	15.60028345	22.00569835
MTHFS	104.9530115	1.656087192	0.606279766	2.731556099	0.006303601	0.015012644	4.244273118	2.825325134	3.775339938	2.125116012	0.348069043
SLC30A5	388.713693	1.655118564	0.381521267	4.33820787	1.44E-05	6.56E-05	19.28018641	19.65443571	21.4573118	7.920886954	6.265242765
CDK7	2714.987054	1.652189797	0.330958127	4.992141496	5.97E-07	3.67E-06	63.46668872	110.7609346	104.8971033	29.79992226	37.01134152
ITGA2B	177.329857	1.651509705	0.586917999	2.813867878	0.004894934	0.012016616	12.73281936	11.17846031	12.04285651	2.414904559	6.419940117
SNHG12	1040.713386	1.651262153	0.356340868	4.633939859	3.59E-06	1.87E-05	52.34603513	47.41632615	47.40680024	14.05474453	21.42558328
GRAMD1B	188.3489888	1.650557366	0.592305506	2.786665581	0.00532534	0.012931217	5.165510694	14.33135937	14.86241419	4.443424389	3.674062115
LRP1	2345.159232	1.650272947	0.48224087	3.422092672	0.000621411	0.001918456	107.1925722	222.4636442	206.2578123	72.15734823	53.60263255
TAC3	592.891345	1.649271913	0.725250377	2.274072464	0.02296163	0.046663346	0.756730866	3.152899062	0.76462581	0.096596182	1.044207128
NCOA7	303.4330669	1.646079282	0.478036696	3.443416154	0.000574415	0.001786073	19.60919983	24.77277834	22.50867229	12.0262247	3.209970059
SNX2	8327.049035	1.645535766	0.376469711	4.370964562	1.24E-05	5.74E-05	637.5622053	786.0545882	534.8079652	238.7374647	224.9299501
RAD23B	2072.701141	1.645339169	0.17679625	9.306414431	1.32E-20	7.04E-19	205.4359795	205.9211608	205.2542409	68.10030857	79.6691364
RAB20	319.5454754	1.645333704	0.658124825	2.500032885	0.012418178	0.027427814	28.06484473	24.89561857	26.47516868	15.02070636	2.900575354
IRAK1	309.0040832	1.644036556	0.730558741	2.250382431	0.024424679	0.049270128	28.9860823	14.4541996	24.65918238	13.08878271	2.281785945
HSPB9	31.92256571	1.643364284	0.523163138	3.141208092	0.001682524	0.004689961	2.697910044	2.579644687	1.863775413	0.676173277	1.044207128
YDJC	82.84227884	1.638896242	0.426312974	3.844349906	0.000120872	0.000440225	3.684950304	4.545088258	5.734693577	1.545538918	1.817693889
CEP170B	134.4992613	1.638537454	0.487350014	3.362136877	0.000773418	0.002333062	8.060828791	7.820827543	7.789625442	1.690433191	4.138154172
ZNF598	75.7986261	1.638280346	0.386052291	4.243674718	2.20E-05	9.61E-05	4.079766408	4.340354553	5.543537125	1.400644644	1.972391241
CCND3	481.4131742	1.635820987	0.587506158	2.784346965	0.005363562	0.013009042	40.27124261	42.46177048	50.94319461	22.9898914	7.850890626
GSR	320.2741091	1.635540514	0.248199851	6.58961119	4.41E-11	5.77E-10	33.1316514	29.19502638	24.22908036	10.28749342	10.48074561
PLEKHF2	260.8245954	1.634667042	0.494061671	3.308629542	0.000937538	0.002764276	21.74778706	18.95834111	16.53503315	4.781511027	9.281841134
PMM2	652.186014	1.634161477	0.366782641	4.455394817	8.37E-06	4.02E-05	40.60025603	33.78106138	37.75339938	14.29623499	12.49181119
SLC2A1	7465.714667	1.633892671	0.503447115	3.245410733	0.001172813	0.003379925	628.777547	663.8285661	970.5968879	183.7742369	378.0416545
PDE4DIP	807.7514795	1.632501317	0.484088385	3.372320777	0.000745376	0.002256777	23.52445953	36.60638651	72.7350302	12.94388844	19.80126109
GCSH	46.13717175	1.631702584	0.446678865	3.652965729	0.000259229	0.00087341	3.684950304	4.954555669	3.201870581	0.917663732	1.972391241
SUZ12	711.4447968	1.631409439	0.237771998	6.861234502	6.83E-12	1.02E-10	46.55539893	53.10792316	59.54523498	17.5322071	21.07751424
YIPF6	3984.792667	1.630549136	0.283304586	5.755463266	8.64E-09	7.62E-08	206.6862305	200.7209247	226.5681854	66.2649811	88.21616511
MGAT1	1390.709162	1.628675467	0.442034123	3.684501679	0.000229151	0.000782251	65.70397998	57.24354401	52.85475914	26.12926733	15.27636353
CMTM4	514.4568445	1.628042459	0.359810101	4.524726946	6.05E-06	3.01E-05	25.43273737	30.30058839	21.21836624	8.500464048	10.13267657
NADK	780.9944577	1.623099979	0.307682581	5.275241688	1.33E-07	9.35E-07	25.33403334	22.02934669	25.23265174	7.389607951	10.40339694
AGFG1	715.2715193	1.62297615	0.281330254	5.768935724	7.98E-09	7.09E-08	48.43077543	55.9332483	67.23928219	17.67710137	24.44218165
CDKN1A	12230.77075	1.622812151	0.679250265	2.389122587	0.016888666	0.035862893	560.8033744	317.3372433	461.5950438	234.8253193	75.84037693
IDH3A	1659.062485	1.621451228	0.379405908	4.273658349	1.92E-05	8.50E-05	117.556495	106.0930061	140.7867273	52.16193848	34.80690425
MTHFD1L	635.6854364	1.619584769	0.237804505	6.810572287	9.72E-12	1.42E-10	28.22935144	36.15597236	41.38537198	11.88133043	13.96143604
FAM46A	1931.315795	1.616827481	0.697907434	2.316678978	0.020521226	0.042415613	75.96919868	118.5817621	127.4535648	54.67343922	20.80679387
CDH23	80.91070191	1.614077521	0.559535468	2.884674185	0.003918189	0.009886945	12.69991801	6.346744865	10.32244844	1.497240827	5.994522399
LINC01012	80.51901693	1.612763275	0.592675989	2.721155074	0.006505424	0.015406263	3.717851646	4.913608928	3.297448807	2.366606468	0.425417719
KCNMB2-AS1	72.07625259	1.6126804	0.683911846	2.358023787	0.018372516	0.038542314	2.665008702	2.129230535	3.010714128	0.144894274	1.856368227
AL354714.2	28.8061077	1.611322355	0.603638747	2.669348784	0.007599849	0.017693322	2.335995282	2.047337053	1.624829847	0.482980912	1.005532789
[truncated: 3,924 more rows]
