# Supplementary material for: Derivation of trophoblast stem cells from naïve human pluripotent stem cells
Source: eLife journal article supplement (doi:10.7554/elife.52504), 2020-02-12
Supplement: supp [file elife-52504-supp-v1.zip › elife_poa_e52504_Supplementary_file_2.csv]

	X38wt_naive_tsc	an_3d_stb	an_evt	an_naive_tsc	an_naive	h9_3d_stb	h9_evt	h9_naive_tsc	h9_naive	clusters
A2M	-0.501704407	-0.501704407	-0.501704407	-0.439007701	1.307232194	-0.501704407	-0.501704407	-0.501704407	2.14200195	1
AASS	0.066234078	-0.791489239	-0.598000961	0.400455496	2.352379695	-0.826778131	-0.747465158	-0.107623082	0.252287301	1
ABCA1	-0.505927541	-0.504496611	-0.506769224	-0.500878373	1.680912227	-0.502313078	-0.501424898	-0.502925014	1.843822513	1
ABCA2	-0.794389214	-0.69749043	-0.200484106	-0.678645703	1.522805777	-0.727069835	0.376326625	-0.556764526	1.755711412	1
ABCA3	-0.809522233	-0.23477903	-0.862821311	0.625368489	2.218579012	-0.20903446	-0.895588059	-0.347414299	0.515211892	1
ABCC10	-0.424032962	-1.081331599	-0.101009282	-0.418445295	1.040328956	-1.118408164	1.606618917	-0.596882932	1.093162359	1
ABCC9	-0.637398205	-0.637398205	-0.637398205	-0.637398205	1.20013743	-0.637398205	0.729604409	-0.637398205	1.894647389	1
ABHD12B	-0.491590472	-0.535188985	-0.528034032	-0.399596213	2.132218075	-0.538026069	-0.468373881	-0.489842591	1.318434169	1
ABHD14A	-0.724574926	-0.042808104	-0.069649874	-0.978684075	1.359026863	-0.18046798	-0.098285178	-1.107212926	1.842656201	1
ABLIM1	-0.163635886	-0.430465033	-0.931946261	-0.047447737	1.297505345	-0.382131905	-0.924431288	-0.429541638	2.012094404	1
AC002091.1	-0.542631778	-0.492532462	-0.370970881	-0.492502304	0.640740988	-0.241321312	-0.493723467	-0.484125459	2.477066673	1
AC003975.1	-0.481503274	-0.481503274	-0.419518395	-0.372896034	2.438400636	-0.481503274	-0.481503274	-0.481503274	0.761530162	1
AC004233.3	-0.099854413	0.324153259	-1.16153778	0.930458448	1.709595699	-0.299534039	-1.272993122	-0.782288973	0.652000922	1
AC005062.1	-0.40826836	-0.625147199	-0.625147199	0.544473397	2.442680212	-0.625147199	-0.625147199	0.004884692	-0.083181144	1
AC005696.4	-0.474420165	0.395879992	-0.501630014	-0.373044387	2.354235909	-0.64220618	-0.63270869	-0.720427765	0.594321301	1
AC006329.1	-0.34796372	-0.61982968	-0.519994719	-0.419302539	1.547636564	-0.583173143	-0.564486471	-0.442041865	1.949155575	1
AC007207.2	-0.47581608	-0.47581608	-0.47581608	-0.47581608	2.329388744	-0.47581608	-0.471229523	-0.47581608	0.99673726	1
AC007218.1	-0.4626285	-0.4626285	-0.4626285	-0.4626285	0.826038843	-0.4626285	-0.4626285	-0.4626285	2.412360655	1
AC007255.1	-0.227108538	-1.12636267	1.334599416	-0.513158705	1.536645163	-1.037604243	0.230113716	-0.848548463	0.651424326	1
AC008555.5	-0.474608139	-0.517957358	-0.456376747	-0.464007909	2.099892055	-0.517957358	-0.517957358	-0.517957358	1.366930173	1
AC008735.6	-0.368922987	-0.368922987	-0.368922987	-0.368922987	2.653713232	-0.368922987	-0.368922987	-0.368922987	-0.071252326	1
AC008915.2	-0.971815846	0.29022915	0.773013634	-1.085948771	0.910462042	0.049962111	0.420296023	-1.626948104	1.24074976	1
AC009055.2	-0.492662623	-0.492662623	-0.492662623	-0.492662623	1.303349166	-0.492662623	-0.492662623	-0.492662623	2.145289195	1
AC009065.8	-1.35152958	0.982353339	-0.30390321	-1.07823804	0.684298295	0.2087807	0.02583858	-0.827670875	1.660070791	1
AC009133.3	0.201281232	-0.694579123	-0.694579123	-0.694579123	2.229788484	-0.694579123	0.393187099	-0.694579123	0.648638803	1
AC009446.1	-0.460255812	-0.460255812	-0.460255812	-0.460255812	0.796283628	-0.460255812	-0.460255812	-0.460255812	2.425507059	1
AC009831.1	-0.24014933	-0.455884495	-0.455926679	-0.321807972	0.400000962	-0.502721179	-0.514689088	-0.464199448	2.555377229	1
AC010615.1	-0.468525689	-0.947966435	-0.539318885	-0.518357638	1.994316521	-0.833200838	0.3560354	-0.251580006	1.208597571	1
AC011447.3	-0.02498085	-0.800469992	-0.515541369	-0.102171977	2.059942173	-0.855376406	-0.590880764	-0.426156727	1.255635913	1
AC016044.1	-0.333333333	-0.333333333	-0.333333333	-0.333333333	2.666666667	-0.333333333	-0.333333333	-0.333333333	-0.333333333	1
AC022150.4	-0.416002838	0.438585926	-1.577471576	-0.183844771	1.470582548	0.21570845	-0.625330649	-0.72940632	1.40717923	1
AC022706.1	-0.485402032	-0.485402032	-0.485402032	-0.485402032	2.236551663	-0.485402032	-0.485402032	-0.485402032	1.16126256	1
AC022784.2	-0.498873409	-0.498873409	-0.498873409	-0.498873409	1.462818838	-0.498873409	-0.498873409	-0.498873409	2.029295026	1
AC027288.1	-0.408349489	-0.405262048	-0.404823208	-0.408349489	2.605966607	-0.404635753	-0.405335446	-0.404743955	0.235532782	1
AC027702.1	-0.976804746	-1.168242921	-0.661633996	0.074986841	1.312225267	-0.408644814	-0.365331459	0.460451241	1.732994587	1
AC064802.1	-0.484242244	-0.484242244	-0.484242244	-0.481872975	2.252172362	-0.484242244	-0.484242244	-0.484242244	1.135154079	1
AC069544.2	-0.94629061	1.183671393	-0.319203345	-1.0594294	1.090878638	0.500096808	-0.821091469	-0.885743414	1.257111398	1
AC090616.2	-0.333333333	-0.333333333	-0.333333333	-0.333333333	2.666666667	-0.333333333	-0.333333333	-0.333333333	-0.333333333	1
AC091820.1	-0.333333333	-0.333333333	-0.333333333	-0.333333333	-0.333333333	-0.333333333	-0.333333333	-0.333333333	2.666666667	1
AC092958.1	-0.333333333	-0.333333333	-0.333333333	-0.333333333	2.666666667	-0.333333333	-0.333333333	-0.333333333	-0.333333333	1
AC093323.1	-0.078868817	0.913135856	-1.33252252	0.571583542	-0.366152482	-0.236441695	-1.036954898	-0.34955597	1.915776984	1
AC104257.1	-0.408230877	-0.513930638	-0.513930638	-0.513930638	1.470032046	-0.513930638	-0.513930638	-0.513930638	2.021782661	1
AC104304.1	-0.52369675	-0.52369675	-0.52369675	-0.52369675	1.767428726	-0.52369675	-0.381659838	-0.52369675	1.756411612	1
AC104461.1	-0.534340404	-0.475797225	-0.545742147	-0.500227584	1.578129343	-0.485377598	-0.454231824	-0.516532347	1.934119788	1
AC105243.1	-0.495804374	-0.50912457	-0.507404363	-0.488026065	1.678774065	-0.50912457	-0.507654246	-0.507365702	1.845729826	1
AC106782.2	-0.693396948	-0.173519938	0.225861578	-0.704591352	0.668348268	-1.042878909	0.607355134	-0.930074102	2.042896267	1
AC106864.1	-0.478857329	-0.51618541	-0.55420659	-0.516148453	1.731971281	-0.577580442	-0.39777396	-0.481983733	1.790764636	1
AC106864.2	-0.45495729	-0.45495729	-0.45495729	-0.45495729	2.452564651	-0.45495729	-0.45495729	-0.45495729	0.73213638	1
AC106875.1	-0.606017251	-0.69135527	-0.206440673	-0.69135527	1.676488966	-0.563682186	0.033975064	-0.69135527	1.739741891	1
AC109322.1	-0.152308296	0.904621581	-1.240628631	-0.215326578	1.356746564	0.913234482	-1.371099142	-0.804446136	0.609206157	1
AC114284.1	-0.467181375	-0.467181375	-0.467181375	-0.467181375	2.385087886	-0.467181375	-0.467181375	-0.467181375	0.88518174	1
AC124312.2	-0.286396465	-0.522396536	-0.522396536	-0.522396536	2.17392591	-0.522396536	-0.522396536	-0.522396536	1.246849773	1
AC125616.1	-0.176352682	-0.446104236	-0.446104236	-0.110390051	2.635832018	-0.446104236	-0.118568108	-0.446104236	-0.446104236	1
AC126177.7	-0.726078791	-0.726078791	0.523523535	0.368670941	2.145367929	-0.726078791	-0.726078791	-0.726078791	0.592831549	1
AC130710.1	-0.503932234	-0.503932234	-0.503932234	-0.503932234	1.781756645	-0.503932234	-0.503932234	-0.503932234	1.745768994	1
AC144450.1	0.876002009	-0.62626421	-1.489413259	-0.508283609	1.532372213	-0.000674165	-0.936271345	0.089041889	1.063490476	1
AC156455.1	-0.511250167	-0.454587509	-0.52357612	-0.515906105	1.488211621	-0.459033685	-0.508609775	-0.52357612	2.008327859	1
AC242426.3	-1.177905166	0.165861153	-0.340112706	-1.093055898	1.137037242	-0.033556814	0.782918009	-0.987775739	1.546589919	1
AC245427.1	-0.333333333	-0.333333333	-0.333333333	-0.333333333	2.666666667	-0.333333333	-0.333333333	-0.333333333	-0.333333333	1
AC254629.1	0.701474531	-0.57784123	-0.57784123	-0.57784123	0.466180195	-0.57784123	-0.57784123	-0.57784123	2.299392656	1
ACADS	-0.369043697	-0.648911581	-0.509123154	-0.716008668	1.938302664	-0.593267477	-0.416556468	-0.215692174	1.530300555	1
ACBD7	0.035358586	-0.864975446	-0.726706503	0.528070701	2.153427288	-0.828570638	-0.805883651	-0.158092837	0.6673725	1
ACKR3	-0.444476281	-0.722814002	-0.634859745	-0.580411134	2.180117113	-0.614367079	-0.21753451	-0.12603886	1.160384497	1
ACOXL	0.313876244	-0.113990288	-1.217403776	-0.218267356	2.162074733	0.294193377	-1.235327165	-0.18167449	0.196518721	1
ACPP	-0.699425113	-0.249648787	0.143582182	-0.629791318	0.023478395	-0.229463855	-0.415597388	-0.502898558	2.559764443	1
ACSL3	0.02893926	0.443016085	-1.2161305	0.451409415	1.466797874	-0.386647606	-1.270272101	-0.780559546	1.26344712	1
ACTA2	-0.276348456	-0.487517291	-0.487517291	-0.487517291	2.473429475	-0.480337135	-0.458380455	-0.459633457	0.663821902	1
ACTC1	-0.417300084	-0.444625089	-0.434308676	-0.447516015	2.530478862	-0.440561299	-0.416471808	-0.447516015	0.517820124	1
ACTG1P14	-0.376014915	-0.47303247	-0.454834819	-0.407990398	2.522812175	-0.471511112	-0.44514491	-0.432361424	0.538077872	1
ACTL8	-0.593262306	-0.593262306	-0.593262306	0.139104463	1.807916805	-0.593262306	-0.593262306	-0.593262306	1.612552569	1
ACVR1B	0.048243761	-0.621973361	-1.183936881	0.401034933	1.620769901	-0.012981714	-1.073434135	-0.571432252	1.393709749	1
ACVR1C	-0.80414847	-0.685461551	-0.713921986	-0.635693967	1.329861304	-0.764567664	1.247367105	-0.362433861	1.388999092	1
ACVR2A	-0.835780538	-0.279707472	-0.998772001	-0.555339758	1.038126858	0.499111953	-0.196414964	-0.690061223	2.018837146	1
ACY1	-0.910080383	-0.852195344	-0.148924912	-0.686664814	-0.554511732	1.162671182	-0.16889201	0.095875178	2.062722836	1
ADAL	0.300551763	-0.217746244	-1.003312484	0.662544434	1.324405349	-0.622656366	-1.566345753	-0.210534754	1.333094056	1
ADAM33	-0.43072561	-0.438883146	-0.380941388	-0.408426229	2.610107463	-0.438883146	-0.270498256	-0.438883146	0.197133459	1
ADAMTS12	-0.451147016	-0.469822049	-0.478249421	-0.46138453	2.385989581	-0.478249421	-0.461795361	-0.468407878	0.883066096	1
ADAMTS16	0.297985241	-0.6043751	-0.6043751	-0.323621237	2.341210525	-0.6043751	-0.6043751	0.706300971	-0.6043751	1
ADAMTS8	-0.524416977	-0.524416977	-0.524416977	-0.316078428	0.568495912	-0.524416977	-0.117890215	-0.524416977	2.487557616	1
ADAMTSL1	-0.498835064	-0.212384854	-0.461085201	-0.493323089	2.573382743	-0.253669233	-0.466568856	-0.498835064	0.311318618	1
ADGRG2	-0.469905329	-0.496504142	-0.449397781	-0.486589919	2.4740587	-0.422374665	-0.322848704	-0.494289023	0.667850862	1
ADORA2B	1.116600924	-0.715877299	-1.008041211	-0.715618438	1.814246488	-0.329174706	-0.829211419	-0.115089177	0.782164839	1
ADPRH	-0.701899802	0.557650531	-0.004077746	-0.933202022	2.327604812	-0.264993491	-0.173441068	-0.89437653	0.086735316	1
AEN	0.30458815	-0.5536439	-0.8085031	-1.581287382	1.093544667	1.697548608	-0.247930576	-0.341387591	0.437071125	1
AFF3	-0.419323261	-0.424765654	-0.372375095	-0.388933392	2.643840114	-0.390648463	-0.28516196	-0.360543021	-0.002089266	1
AFG1L	-0.535487222	-0.287448719	-0.526910567	-0.497730143	1.594091191	-0.331422098	-0.576817439	-0.731914797	1.893639794	1
AGBL2	-0.531661335	-0.485456526	-0.386226374	-0.408097984	0.907459634	-0.469783011	-0.525007699	-0.472490852	2.371264147	1
AGL	-0.043236815	-0.857905434	-0.680491798	-0.068269974	1.695841972	-0.841825114	-0.646911423	-0.214154334	1.65695292	1
AGMAT	-0.364784399	-0.670274984	-0.029455669	-0.969416141	2.361437596	-0.488010849	0.624082675	-0.519499745	0.055921515	1
AIFM3	-1.365030702	1.267779804	-0.196072953	-1.061975844	1.277415841	0.524798803	-0.437762966	-0.799656159	0.790504177	1
AIPL1	-0.498171418	-0.498171418	-0.498171418	1.441527946	2.04567198	-0.498171418	-0.498171418	-0.498171418	-0.498171418	1
AK4	-0.304037688	-0.633591453	-0.639250884	-0.038164093	2.228868539	-0.59605706	-0.695262728	-0.389261772	1.066757139	1
AKAP12	-0.233453084	-0.465780792	-0.6019594	-0.377684489	2.273509735	-0.492425651	-0.620226942	-0.545154951	1.063175574	1
AKAP1	-0.27555574	-0.685656465	-0.657370423	-0.416563416	2.015531584	-0.693953734	-0.415167394	-0.300200874	1.428936462	1
AKIRIN1	-0.913606374	-0.872271956	-0.721997113	-0.268945017	1.711430462	-0.886646295	0.524568838	0.080601134	1.346866321	1
AKNA	-1.041629173	-0.697428634	-0.654052926	-0.444566607	1.226189007	-0.574354176	0.489384487	-0.222115089	1.91857311	1
AL009031.1	-0.454611433	-0.597554559	-0.597554559	-0.241760251	1.502194678	-0.597554559	-0.597554559	-0.389930043	1.974325285	1
AL031595.3	-0.595628634	-0.636773692	-0.36951543	-0.636732961	1.959673089	-0.650179587	-0.021783419	-0.520045782	1.470986416	1
AL031666.2	-0.49706164	-0.59895545	-0.385848341	-0.598741287	1.846475767	-0.098839178	-0.746340572	-0.539253831	1.618564531	1
AL035425.1	-0.81581921	-0.81581921	1.693924702	-0.376072676	1.491025386	-0.81581921	-0.81581921	0.210640833	0.243758594	1
AL109976.1	-0.172973642	-1.100773655	0.574829698	-0.697979735	0.80092338	-1.057732744	0.567215702	-0.735138398	1.821629394	1
AL117378.1	-0.423330009	-0.428933958	-0.428933958	-0.414985381	0.412545773	-0.428933958	-0.428933958	-0.420794236	2.562299684	1
AL117378.2	-0.376601332	-0.376601332	-0.376601332	-0.376601332	-0.010879963	-0.376601332	-0.376601332	-0.376601332	2.647089285	1
AL118516.1	-0.203357182	-0.387764453	-0.944727865	-0.537828742	0.918179825	0.546790972	-1.334519096	0.018861043	1.924365499	1
AL121885.2	-0.504407225	-0.477721435	-0.504407225	-0.504407225	1.981905065	-0.504407225	-0.504407225	-0.504407225	1.52225972	1
AL132655.2	-0.183654799	-0.808900315	-0.512831926	-0.160452443	1.402179083	-0.652996719	-0.429309379	-0.65753907	2.003505567	1
AL138720.1	-0.763730672	-0.489328522	0.241951411	-0.654431879	1.870856322	-0.852679368	1.327772391	-0.824367943	0.143958259	1
AL157817.1	-0.461040421	-0.461040421	-0.461040421	-0.461040421	0.806047986	-0.461040421	-0.461040421	-0.461040421	2.421234964	1
AL158151.1	-0.454692621	-0.422706264	-0.616831678	-0.315607071	2.350302194	-0.571780459	-0.594925372	-0.292522135	0.918763406	1
AL353747.4	-0.45966103	-0.45966103	-0.19198581	-0.45966103	2.615777935	-0.45966103	-0.2308691	-0.45966103	0.105382123	1
AL355490.1	-0.517948341	-0.708926295	0.1049665	-0.471248303	0.537896924	-0.708926295	-0.245150072	-0.431531315	2.440867196	1
AL357562.1	-0.397702339	-0.397702339	-0.397702339	-0.397702339	2.620317816	-0.397702339	0.16359856	-0.397702339	-0.397702339	1
AL365259.1	-0.549195269	-0.455381292	-0.442046821	-0.549195269	2.405386815	-0.210662108	-0.457611522	-0.549195269	0.807900734	1
AL392023.1	-0.384621501	-0.384621501	-0.384621501	-0.384621501	2.638477169	-0.384621501	-0.384621501	-0.384621501	0.053873335	1
AL450326.1	-0.914117495	0.252235757	-0.288841643	-0.915650681	1.709614988	-0.027265212	-0.345476281	-0.959148114	1.488648682	1
AL589843.1	0.357604817	0.250120562	-1.399754364	-0.288835657	1.738957948	0.188381696	-1.259326329	-0.513377039	0.926228367	1
AL591845.1	-0.787675125	0.011054176	-0.330703126	-0.967716765	1.107312825	-0.581453754	0.643995164	-0.951857494	1.8570441	1
AL596244.1	-0.560968196	-0.022359758	-0.478033771	-0.267332359	2.460369302	-0.758163364	-0.039851959	-0.758163364	0.424503468	1
ALDH1L1	-0.485513253	-0.496689021	-0.449061127	-0.482780428	2.531250085	-0.245890219	-0.415270374	-0.447990698	0.491945036	1
ALDH2	-0.566719775	-0.861655798	-0.346812682	-0.216351218	2.304241114	-0.790941475	0.274091644	-0.505466479	0.709614669	1
ALDH3A2	0.00960395	-0.957104122	-0.64021331	0.070734066	2.048210801	-0.86806883	-0.653101272	-0.138963402	1.12890212	1
ALDH6A1	-0.736111434	0.837732485	-0.316445623	-0.217599656	0.499186124	0.346488521	-1.149871318	-1.155846118	1.89246702	1
ALDOC	-0.732337038	-0.37758553	-0.127881697	-0.413344518	1.79990654	-0.535510246	-0.721486276	-0.557822704	1.666061469	1
ALG1L7P	-0.36631222	-0.232541334	-0.803684402	-0.622366257	1.004130487	-0.680486217	-0.439131146	-0.118012943	2.258404031	1
ALG1L	-1.000130121	-1.149564881	0.064377997	-0.460814472	0.023773668	-0.508429621	0.716112967	0.154590194	2.160084268	1
ALKBH1	-0.328740176	0.453632985	-0.5805396	-0.657579958	1.970732117	-0.159569293	-1.228329392	-0.558821035	1.089214351	1
ALOX12	-0.313019067	-0.546626897	-0.197006355	-0.605888964	2.283749915	-0.556204833	-0.512394077	-0.585564073	1.032954353	1
ALOX12P2	-0.333333333	-0.333333333	-0.333333333	-0.333333333	2.666666667	-0.333333333	-0.333333333	-0.333333333	-0.333333333	1
ALOX15B	-0.798262873	-0.798262873	-0.590582909	-0.070487072	1.587864056	-0.798262873	-0.620751114	0.475822418	1.61292324	1
ALX1	-0.602689506	-0.938137446	-0.392712906	-0.30799122	1.379112244	-1.255111526	0.858254013	-0.236628974	1.49590532	1
AMER1	-0.309305306	-1.010625928	-0.669193256	-0.145505382	1.701364969	-0.923760081	0.000113115	-0.255726506	1.612638375	1
ANAPC16	-1.494658907	0.720993928	0.317680309	-0.188295215	1.097769493	0.69716973	-0.755864055	-1.374126374	0.979331091	1
ANGEL2	-0.73515084	1.037545651	-0.335360407	-0.761596897	1.634436563	0.021405821	-0.837517784	-1.088216592	1.064454486	1
ANKRD18CP	-0.453660992	-0.592034197	-0.552720427	-0.144288853	2.163294919	-0.550630531	-0.592034197	-0.51163951	1.233713786	1
ANKRD29	-0.51671132	-0.51671132	-0.51671132	-0.230662802	2.296853279	-0.51671132	-0.51671132	-0.51671132	1.034077443	1
ANKRD35	-0.287456918	-0.164498391	-0.791835308	0.045117434	2.50106142	-0.791835308	-0.179411996	-0.547632539	0.216491607	1
ANKRD37	-0.285603316	-0.797775652	-0.348760005	-0.340598815	2.373316331	-0.679746291	-0.20169302	-0.518939305	0.799800073	1
ANKRD42	-0.587401426	1.032116076	-0.751656015	-0.776620235	0.926907336	0.494772662	-1.043264941	-0.868204239	1.573350781	1
ANKRD45	-0.344624464	-0.511128965	-0.47184333	-0.561205566	0.826991066	-0.495887122	-0.317311783	-0.527769083	2.402779247	1
ANO3	-0.325201832	-0.462498336	-0.492164856	-0.432796096	2.466511792	-0.492164856	-0.492164856	-0.457520093	0.687999133	1
AOX1	-0.410695258	-0.486756649	-0.432731378	-0.486756649	2.554772499	-0.429859427	-0.302047041	-0.431517167	0.425591071	1
AP000357.2	-0.60855788	-0.60855788	-0.60855788	-0.60855788	1.782523113	-0.60855788	0.28084368	-0.60855788	1.587980485	1
AP000438.1	-0.015886256	0.303464231	-1.325868361	-0.918290016	1.346750496	0.144016871	0.662379946	-1.325868361	1.12930145	1
AP002784.1	-0.445030458	-0.543698294	-0.543698294	-0.396344074	2.129587201	-0.543698294	-0.51973752	-0.45770943	1.320329165	1
AP4M1	-1.49942775	-0.444182621	-0.158321603	-0.821771295	1.301564046	0.817597136	0.587848541	-0.92181497	1.138508515	1
APCDD1	-0.896314183	-0.368577841	-0.465780342	-0.141951295	1.774846412	-0.533577584	1.606039802	-0.896314183	-0.078370787	1
APELA	-0.489895684	-0.490925272	-0.491654443	-0.489465613	2.174147507	-0.491654443	-0.491654443	-0.48909985	1.260202242	1
APOBEC3F	-0.401680363	-0.443334637	-0.594381266	-0.328697889	2.249302619	-0.547256301	-0.639652352	-0.409961366	1.115661556	1
APOC1	-0.669104459	-0.91151027	0.893497	-0.68073106	0.998090353	-1.026153795	0.832023137	-0.849269992	1.413159085	1
APOO	-0.436560675	-0.541265969	-0.758310178	-0.476176704	1.731263833	-0.206601442	-0.621967522	-0.447532411	1.757151068	1
AR	-0.769121504	-0.093313501	-0.46037528	-0.228149655	2.246102125	-0.443962532	-0.505224658	-0.769121504	1.023166511	1
ARAF	-0.31205841	-0.437357015	-0.417609997	-0.994190654	1.809032206	0.547473291	-0.920310833	-0.603512235	1.328533647	1
ARHGAP12	-0.2654484	0.004671956	-0.467316783	-0.506313441	2.485570391	0.461660774	-0.682678493	-0.698015455	-0.332130548	1
ARHGAP42	-0.989570025	-0.303751708	0.557701489	-0.812395155	1.876334096	-0.571841943	-0.073836185	-0.854736806	1.172096237	1
ARHGEF10L	-1.516199598	0.272209291	-1.023753634	-0.334291543	0.379304467	0.512115151	0.307281117	-0.519395449	1.922730199	1
ARHGEF11	0.201464726	-0.509974501	-1.514775646	-0.334963225	0.967490392	-0.19489292	-0.804167147	0.296712912	1.89310541	1
ARHGEF15	-0.576864413	-0.576864413	-0.576864413	-0.576864413	1.224952544	-0.112350904	-0.493087515	-0.476646722	2.164590248	1
ARMT1	-0.428697006	-0.409430907	-0.618427603	-0.39072725	1.817578947	-0.493470319	-0.708160684	-0.458291215	1.689626038	1
ARRDC2	-1.115730787	-0.609702657	-0.51383422	-0.830458105	1.233388267	0.091944698	1.110030371	-0.793369434	1.427731867	1
ATG13	-0.989620299	0.984927879	-0.247107772	-1.186393876	1.162518013	0.499329845	-0.379214906	-1.110767728	1.266328844	1
ATG14	-1.051241283	-0.08175572	-0.008143539	-1.051412379	1.32016967	0.02587465	0.488918571	-1.18798575	1.54557578	1
ATG16L1	-0.264334276	0.118854146	-0.770359668	-0.428141125	1.86981666	-0.155190158	-1.291672879	-0.413093654	1.334120955	1
ATG3	-0.321421354	-0.586267182	-0.649764861	-0.393099779	1.888985419	-0.507061246	-0.661035722	-0.374580185	1.60424491	1
ATG4D	-0.339525368	0.243041412	-0.667612911	-0.907024292	1.620957046	0.8045911	-0.898781628	-1.037813041	1.182167682	1
ATP11C	-0.2861617	-1.088499062	-0.559555231	-0.139752127	1.450630651	-1.11256709	0.58988498	-0.440367982	1.586387562	1
ATP12A	-0.397197709	-0.49475546	-0.470888676	-0.466191058	0.929919085	-0.493928263	-0.498833284	-0.470260624	2.362135989	1
ATP6V1F	-0.00715285	0.23953103	-1.420120871	0.192130447	1.228201668	0.752551069	-1.747107685	-0.10451698	0.866484171	1
ATP8A2	0.255027809	-0.577119634	-0.567496041	-0.02851121	2.453375486	-0.416271938	-0.761457538	0.291842092	-0.649389026	1
ATP8B2	-0.48953733	-0.569894031	-0.561570753	-0.363228235	1.533573001	-0.561861282	-0.556227798	-0.394794129	1.963540557	1
ATXN1	-0.454628504	-0.558275996	-0.596860469	-0.56694103	2.322625109	-0.395755239	-0.194640099	-0.524790117	0.969266344	1
ATXN7L1	-0.500729519	-0.415804945	-0.715933468	-0.567370666	2.137786242	-0.310885016	-0.294243151	-0.606085887	1.273266409	1
AURKC	-0.52461945	-0.396070349	-0.488158733	-0.468733792	2.2938297	-0.445617851	-0.481662992	-0.546694457	1.057727925	1
AZIN2	-0.573298885	-0.627135994	-0.692242289	0.900131205	2.158723334	-0.697970862	-0.825051794	-0.041763373	0.398608659	1
B3GALT5	-0.657388137	0.214285319	-0.657388137	-0.657388137	0.486467131	0.241321581	-0.657388137	-0.657388137	2.344866652	1
B3GALT5-AS1	-0.510509439	-0.510509439	-0.510509439	-0.510509439	2.49083729	-0.510509439	-0.287229464	-0.243411908	0.592351277	1
B3GLCT	-0.594528953	-0.972960939	-0.651325921	-0.526536063	1.642612215	-0.850149276	0.489318193	-0.064153075	1.527723818	1
B3GNT4	-0.174903604	-0.73976488	-0.684857709	0.081842086	1.947132095	-0.719485838	-0.890365724	-0.167431949	1.347835523	1
B4GALNT1	-0.254167977	-0.632441573	-0.632441573	-0.094415033	2.454565866	-0.551594406	-0.632441573	-0.239983435	0.582919706	1
BACE1	-0.460327279	-0.469690578	-0.597158745	-0.033532299	2.292444601	-0.603195395	-0.554614788	-0.559054834	0.985129317	1
BAIAP2L2	-0.77789226	-0.528367523	-0.600847693	-0.561961009	2.490061083	0.020502559	0.090527923	-0.398546023	0.266522942	1
BARD1	-0.308811108	-0.761778876	-0.456286879	-0.246171313	1.60360268	-0.778708357	-0.568991888	-0.337553259	1.854699	1
BBC3	-1.002758589	0.343766433	-0.80562573	-1.29407205	0.115383695	0.886104834	1.142245157	-0.755616367	1.370572616	1
BBS12	-0.609374881	-0.005330118	-0.213620776	-0.303961683	0.751859901	-0.890695259	-0.895312455	-0.138189476	2.304624747	1
BBS2	-0.583147729	0.878333082	0.744261955	-0.713961969	1.039398899	0.153000966	-1.404442799	-1.22765003	1.114207626	1
BCL11A	-0.499441313	-0.499441313	-0.488131094	-0.499441313	2.08652611	-0.499441313	-0.499441313	-0.487876897	1.386688443	1
BCL11B	-0.431403368	-0.431403368	-0.431403368	-0.431403368	2.557454326	-0.431403368	-0.398216669	-0.431403368	0.42918255	1
BCL2L11	-0.903056621	0.101966112	-0.841039263	-0.643842175	1.800874765	0.105823014	0.021158052	-0.98997834	1.348094455	1
BCL2L1	1.295899885	-0.121877232	-1.356021442	-0.461246512	1.409139476	0.428900836	-1.357768447	-0.256005223	0.418978658	1
BCL2L14	-0.265806032	-0.687882345	-0.488019321	-0.337690955	2.2973266	-0.687882345	-0.346221692	-0.48352743	0.999703521	1
BCL6B	-0.582596624	-0.582596624	-0.463298167	-0.582596624	0.651008805	-0.080035487	-0.582596624	-0.216657598	2.439368944	1
BCL7A	-0.426609665	-0.421039428	-0.742646995	-0.172665803	1.649888642	-0.358857556	-0.747577482	-0.595652087	1.815160373	1
BECN1	-0.857226702	0.680324008	0.461673866	-1.165314409	1.199596258	0.950292539	-0.92221073	-1.168155314	0.821020484	1
BEND3	-0.359649506	-0.927079183	-0.464887238	-0.55974078	1.980024897	-0.86280024	0.342862952	-0.391965338	1.243234435	1
BEND4	-0.581309107	-0.49819053	-0.486376277	-0.456556189	2.090967846	-0.48132971	-0.378452579	-0.581309107	1.372555654	1
BEST4	-0.556578366	0.20943783	-1.056710342	-0.698555701	1.444051478	0.350923639	0.16083359	-1.304506297	1.451104169	1
BICC1	-0.434640805	-0.427235447	-0.501202828	-0.287733613	2.561896654	-0.331172794	-0.468941556	-0.500180848	0.389211236	1
BICD1	-0.369324972	-0.568897293	-0.577146818	-0.436820461	1.945184733	-0.527532	-0.558355527	-0.464751881	1.557644218	1
BMP2K	-0.61418481	-0.935807754	-0.205887127	-0.542958159	0.566043335	-0.81120872	1.530876861	-0.628026313	1.641152686	1
BMPR1B	-0.654138499	-0.628305322	-0.007430284	-0.232583811	2.35311291	-0.760106717	0.655242243	-0.760106717	0.034316198	1
BNC2	-0.516108735	-0.554678823	-0.514498376	-0.407473699	2.127093313	-0.554678823	-0.504724326	-0.39781456	1.322884029	1
BOC	-0.495957001	-0.500505523	-0.539628946	-0.437254586	2.365501361	-0.563680408	-0.296430598	-0.440720319	0.908676021	1
BRINP3	-0.416961313	-0.416961313	-0.416961313	-0.416961313	2.600710018	-0.416961313	-0.356287147	-0.416961313	0.257345004	1
BRPF3	-0.421587636	0.316096682	-1.121097122	-1.002133874	1.314537735	-0.026834117	1.015446624	-1.19880455	1.124376259	1
BRWD3	-0.528360888	-0.954829903	-0.587310662	-0.280654794	1.808033514	-0.89859662	0.075083969	-0.144175175	1.510810559	1
BTK	-0.555701985	-0.44090238	-0.428304033	-0.532682137	1.801244101	-0.488075178	-0.562675894	-0.514879104	1.721976611	1
C10orf82	-0.583323644	-0.721727983	-0.672574712	-0.420293117	1.876092857	-0.669961755	-0.049518027	-0.319664104	1.560970486	1
C13orf42	-0.495520343	-0.495520343	-0.495520343	-0.495520343	1.369988196	-0.495520343	-0.495520343	-0.495520343	2.098654205	1
C14orf2	0.659290003	-0.021988922	-1.720760425	0.200486475	0.799267768	0.487022324	-1.629500981	0.238535173	0.987648585	1
C14orf39	-0.333333333	-0.333333333	-0.333333333	-0.333333333	-0.333333333	-0.333333333	-0.333333333	-0.333333333	2.666666667	1
C15orf61	-1.636146235	-0.187364003	-1.405336321	-0.286598293	0.553074785	1.162575966	0.319641962	0.306635927	1.173516213	1
C16orf54	-0.746913477	-0.067858667	-0.851986504	-0.721219862	0.176986881	1.034393938	-0.341661937	-0.623059061	2.141318687	1
C17orf62	-0.126020968	0.709094701	-1.712691118	0.081871244	1.444087533	0.437845617	-1.435032075	0.190042256	0.410802811	1
C19orf25	0.160472663	0.923224201	-1.533535607	-0.754801534	1.8005808	0.475216925	-0.49138902	-0.691753322	0.111984893	1
C19orf53	0.836924231	0.512821387	-1.647278545	-0.290034925	1.003944995	0.412177435	-1.648675873	0.352190973	0.467930323	1
C19orf84	-0.48713007	-0.48713007	-0.48713007	-0.48713007	2.217393186	-0.48713007	-0.48713007	-0.48713007	1.192517305	1
C1orf109	0.146931213	0.996199108	-0.579981541	-0.69720495	0.814228919	-0.222528501	-1.599590739	-0.487404317	1.629350809	1
C1R	-0.422399723	-0.425909262	-0.415938168	-0.417173801	2.575622977	-0.420658687	-0.423778596	-0.413165271	0.363400531	1
C1S	-0.481526744	-0.398043855	-0.448738109	-0.482706878	2.466751011	-0.442341783	-0.416185855	-0.490643357	0.693435571	1
C2orf40	-0.496670127	-0.496670127	-0.496670127	-0.210015745	2.510821979	-0.496670127	-0.35683441	-0.496670127	0.539378812	1
C3	-0.53003631	-0.53413648	-0.479262172	-0.486897971	2.13165658	-0.419204696	-0.501379791	-0.501503396	1.320764236	1
C3orf14	0.68288985	-0.941279368	-0.543868569	-0.363041177	1.6482144	-0.937553593	-0.630232374	-0.362766228	1.44763706	1
C5orf22	-0.543245488	0.591045063	0.02315176	-0.882815807	1.774723867	0.179130956	-1.012216796	-1.151375201	1.021601646	1
C5orf34	-0.128372194	-1.0534429	0.033646497	-0.322262073	1.704815416	-1.158381189	-0.349411938	-0.254272232	1.527680613	1
C6orf203	0.9192059	0.737209801	-1.800669982	0.148553185	0.82209116	-0.158747964	-1.485691391	0.180785987	0.637263303	1
C7orf57	-0.738315912	1.326041272	-0.750236372	-0.707450121	1.664673853	0.733859644	-0.823393789	-0.798043614	0.092865039	1
C8orf4	-0.454797293	0.32184504	0.608812265	-0.588925693	-0.80988375	-0.212238559	-0.567361338	-0.648708079	2.351257407	1
C9orf78	-0.52772526	1.153833557	-0.523205523	-0.930881549	1.23558164	0.394193593	-0.852275601	-1.1664381	1.216917243	1
C9orf85	-0.779741113	1.160523551	-1.174008334	0.117689655	1.677155805	0.07885957	-1.317575864	-0.068345251	0.30544198	1
CA13	-0.288407761	-0.471445738	-0.50783504	-0.289367794	2.590071963	-0.469535443	-0.485632401	-0.343164307	0.265316522	1
CA5BP1	-0.615681299	0.719192804	-1.119609038	-0.269686198	1.896414648	0.44479374	-1.171559161	-0.491441045	0.607575549	1
CA7	-0.53417058	-0.104070593	-0.53417058	-0.53417058	2.287827491	-0.53417058	-0.53417058	-0.53417058	1.021266582	1
CA9	-0.753506944	-0.753506944	-0.360308396	0.193793234	1.73119063	-0.753506944	-0.585466259	-0.351471303	1.632782926	1
CACNA1F	-0.790759556	-0.780392265	0.13331107	-0.145248994	0.346690575	-0.578791089	0.04453695	-0.647976077	2.418629387	1
CACNA2D2	-0.504804134	-0.47409779	-0.505505977	-0.487817218	2.067045433	-0.504838711	-0.491236101	-0.511641023	1.412895521	1
CALB1	-0.446457025	-0.446457025	-0.442171618	-0.438948319	0.607213347	-0.446457025	-0.442794129	-0.444266164	2.500337956	1
CALCB	-0.746602473	1.178519895	-0.746602473	-0.746602473	1.148081882	-0.167692866	-0.746602473	-0.746602473	1.574103455	1
CALCR	-0.340971947	-0.223384028	-0.823319881	0.977571023	1.538481209	1.341583268	-0.823319881	-0.823319881	-0.823319881	1
CALN1	-0.536717617	-0.536717617	-0.536717617	-0.536717617	-0.536717617	-0.536717617	0.495698242	0.286630555	2.437976902	1
CAPG	-0.688198323	-1.049879581	0.720656339	-0.626664373	1.647171422	-0.73189538	1.194604371	-0.836086987	0.370292514	1
CAPN13	-0.431704617	-0.431704617	-0.431704617	-0.431704617	2.542804421	-0.431704617	-0.431704617	-0.431704617	0.479127897	1
CARMIL2	0.39736004	-0.84179007	-0.7652553	-0.238335855	2.147972148	-0.76118676	-0.580121652	-0.294005899	0.935363347	1
CASC15	-0.63524898	-0.695039985	-0.312880753	-0.345931459	1.366418893	-0.726805652	-0.045148683	-0.630447505	2.025084123	1
CASK	-0.039371542	-0.898585918	-0.783919713	0.209382742	2.133070294	-0.851866872	-0.50366801	-0.237992245	0.972951264	1
CATSPER4	0.189895525	1.633025277	-0.255334997	-0.213711471	1.54372198	-0.724960134	-1.066801589	-1.066801589	-0.039033002	1
CATSPERG	-0.149112085	-0.744988632	-0.788941605	0.066227403	0.972607784	-0.663296265	-0.91722971	0.089139865	2.135593244	1
CBX2	-0.395147012	-0.66984571	-1.421629859	0.475990533	1.434451816	0.03672228	-1.149066052	0.430343452	1.258180552	1
CBX8	-0.790348376	-0.569011395	-0.922853435	-0.72599215	1.467495047	-0.404427249	-0.17425336	0.325026781	1.794364137	1
CCDC102B	-0.339061788	-0.307537623	0.640511367	-0.686759767	0.730513504	-0.494725964	-0.153755954	-1.415052733	2.025868958	1
CCDC116	-0.796593074	-0.582065701	0.016463219	-0.608770809	1.564756646	-0.775317387	0.145097968	-0.716297389	1.752726527	1
CCDC160	-0.599897247	-0.477787998	-0.565374032	-0.171186799	2.131559748	-0.559175125	-0.482642323	-0.562753235	1.28725701	1
CCDC63	-0.543847921	-0.489255997	-0.608725844	0.207653509	2.338967967	-0.600270359	-0.767785075	-0.27988288	0.743146602	1
CCDC80	-0.486564561	-0.517485018	-0.463309152	-0.518485322	2.214932888	-0.522708078	-0.368084885	-0.52892049	1.190624619	1
CCHCR1	0.01191126	-1.05101047	0.141997603	-0.004032464	2.206125673	-1.031715666	-0.098179936	-0.765286603	0.590190605	1
CCL26	-0.52451578	-0.52451578	-0.52451578	-0.422962597	2.405514699	-0.280355732	-0.425436453	-0.52451578	0.821303201	1
CCM2L	0.491347765	-0.552767187	-0.256119463	-0.552767187	2.514718	-0.552767187	-0.299211378	-0.552767187	-0.239666176	1
CCNA1	-0.490386213	-0.448247071	-0.410331939	-0.475730039	2.542583843	-0.411392328	-0.279347291	-0.488719126	0.461570163	1
CCND2	-0.371962104	-0.482988576	-0.482988576	-0.428072518	2.434997582	-0.476599913	-0.481260244	-0.480921068	0.769795417	1
CCNO	-0.929843389	0.170134072	0.468534815	-0.839549225	2.223705999	-0.183905211	0.266717968	-1.057473359	-0.11832167	1
CCPG1	-0.341763817	-0.553163027	-0.956435283	-0.486617733	1.75175178	0.949352406	-0.355929219	-1.082723844	1.075528738	1
CCT6P1	-0.724847372	0.164066228	-0.779379054	-1.208472283	1.78791643	0.401368615	-0.018013448	-0.798885901	1.176246785	1
CD19	-0.595558174	-0.875165674	-0.590562193	-0.179920638	1.125743412	-0.826573907	-0.581700534	0.546069935	1.977667775	1
CD1D	-0.534794087	-0.361265761	-0.534794087	-0.534794087	1.856191444	-0.482611836	-0.534794087	-0.534794087	1.661656587	1
CD320	-0.293989895	-0.53138921	-0.642609783	-0.420916544	1.612214874	-0.44643502	-0.682061359	-0.478519035	1.883705972	1
CD44	-0.263224188	-0.879596337	-1.074784463	-0.426217077	0.471282802	1.922871381	-0.934560257	0.188345676	0.995882463	1
CD53	-0.489237576	-0.499958042	-0.324369112	-0.501082026	2.424411552	-0.482952256	-0.425224681	-0.490338629	0.788750769	1
CD7	-0.593581043	-0.582423906	-0.249520497	-0.582417189	2.027153799	-0.593581043	-0.255932143	-0.593581043	1.423883066	1
CD81	-0.162168929	-0.655473354	-0.598987719	-0.212843104	2.372119399	-0.640680913	-0.621668214	-0.279142131	0.798844964	1
CD82	-0.397754357	-0.727049558	-0.629077081	-0.779855136	2.061208239	-0.494027164	0.43157541	-0.594855007	1.129834654	1
CDA	-0.45413664	-0.504345105	-0.549177873	-0.358359306	1.981235542	-0.525927115	-0.55156522	-0.553336192	1.51561191	1
CDC25C	0.218353056	-1.108279189	0.324962749	-0.348560089	2.028743927	-1.140291554	-0.073109469	-0.682590249	0.780770817	1
CDCA7L	-0.478944352	-0.478944352	-0.478944352	-0.478944352	2.313666513	-0.478944352	-0.478944352	-0.466264679	1.026264276	1
CDH10	-0.617282667	-0.617282667	-0.030197025	-0.617282667	2.418096287	-0.617282667	0.386325045	-0.617282667	0.312189029	1
CDH26	-0.954889154	-0.927205114	0.442118725	-1.398890053	1.58883387	0.556718654	0.743172276	-0.611546302	0.561687099	1
CDH4	-0.578646853	-0.783264462	-0.783264462	-0.401285007	2.389430153	0.288175543	-0.534814888	-0.040248098	0.443918074	1
CDH6	-0.736582178	-0.736582178	-0.198044503	-0.26478101	1.119666905	-0.736582178	0.184034	-0.736582178	2.105453319	1
CDIP1	-0.650393536	-0.406023786	-0.746746328	-0.205748844	2.461141228	-0.159732235	-0.752631298	0.399070139	0.061064661	1
CDK2AP1	-0.413262759	-0.810483589	-0.257845793	-0.460379936	2.335306787	-1.018136407	0.196109426	-0.155308522	0.584000794	1
CDKN2D	-0.524681873	-0.347202839	1.089105954	-1.048321603	1.510629661	-0.873172741	0.196517051	-1.058785723	1.055912114	1
CDON	-0.53188996	-0.728706585	-0.262720194	-0.647058456	1.270091585	-0.630554996	-0.277304637	-0.315775119	2.123918363	1
CDR1	-0.557149442	-0.468523786	-0.436937313	-0.559406515	0.943676095	-0.475402384	-0.224140707	-0.563472032	2.341356084	1
CEBPZ	-0.221069726	-0.518025163	-0.581171013	-0.497066816	1.844346461	-0.562193384	-0.635511609	-0.484965934	1.655657183	1
CELF2	-0.514517421	-0.364131168	-0.516748405	-0.494536172	2.439998803	-0.303132647	-0.484241697	-0.507026908	0.744335616	1
CENPA	-0.299911772	-0.848952359	-0.631973545	-0.319389042	1.821545696	-0.781828606	-0.448739885	-0.087504591	1.596754104	1
CEP135	-0.462964935	-0.846574003	0.207201591	-0.611943452	1.563238072	-1.009382472	1.073222644	-0.964712515	1.05191507	1
CEP164	-0.572442276	1.254961904	-1.185167137	-0.039291528	1.412588199	-0.144574019	-0.099651232	-1.424241793	0.797817881	1
CERS6	-0.911081624	-0.911081624	-0.026249467	0.18709348	2.350583142	-0.872253741	0.128829276	0.031333646	0.022826913	1
CES2	-0.148080405	0.809487145	-1.054442438	-0.866313463	1.173394534	0.41335431	-1.047993307	-0.769929009	1.490522632	1
CETN2	-0.088946018	-1.159630389	-0.349601394	-0.185392881	1.612696774	-0.971485557	-0.251136727	-0.281053971	1.674550164	1
CGNL1	0.019361296	-0.610852782	-0.635179645	-0.376726157	2.01489262	-0.618450269	-0.680028492	-0.500708128	1.387691556	1
CHCHD4	-0.098095919	-0.519594899	-0.696521794	-0.562036246	1.575537733	-0.365387733	-0.865560966	-0.325352231	1.857012056	1
CHD1L	-0.331942484	-1.180866451	-0.113082832	-0.588739385	0.702400922	-0.97596709	0.667466159	-0.226965935	2.047697096	1
CHDH	-0.366173145	-0.993428832	-0.314453773	-0.205441368	1.80543263	-1.03109197	-0.349936631	-0.057974883	1.513067972	1
CHGA	-0.358397484	-0.557643177	-0.557643177	-0.557643177	0.743157021	-0.557643177	-0.315716254	-0.268239317	2.429768744	1
CHODL	-0.835471665	0.073706973	-0.573924403	-0.881199736	2.14587634	0.705268116	-0.599049756	-0.621334441	0.586128572	1
CHP1	-0.248587949	-0.296496752	-0.89345717	0.044020949	0.737465176	0.166132804	-1.325476499	-0.331173859	2.1475733	1
CHST12	-0.477576353	-1.103116135	-0.471714584	0.00633748	2.213409164	-1.03655136	0.131753153	0.182181137	0.555277498	1
CLIP3	0.124577178	-0.895459255	-0.531419799	0.33563406	2.262089542	-1.009397981	-0.591448799	-0.204491008	0.509916062	1
CLK4	-0.599654461	0.199366975	-0.697135974	-0.740864216	2.32120229	0.216105695	-0.421234646	-0.815312146	0.537526482	1
CLPX	-0.849243608	-0.2991605	-0.230282173	-0.801987783	1.893712124	-0.337727339	-0.275070438	-0.625392461	1.525152178	1
CNBP	-0.851131975	1.126391866	-0.44690881	-0.901039066	0.984902493	0.862405063	-0.966690061	-0.982970367	1.175040856	1
CNMD	-0.399426278	-0.399426278	-0.399426278	-0.397454372	2.618530612	-0.397055792	-0.399426278	-0.399426278	0.173110942	1
CNTFR	-0.659243283	0.04202404	-0.659243283	-0.659243283	2.331535107	0.816918877	-0.316945194	-0.659243283	-0.2365597	1
CNTN4	-0.715685252	0.061324418	-0.715685252	-0.715685252	1.833396277	-0.248371151	-0.33641624	1.552807706	-0.715685252	1
CNTN6	-0.380051409	-0.380051409	-0.380051409	-0.380051409	2.643604689	-0.380051409	-0.380051409	-0.380051409	0.016755175	1
COL11A1	-0.406921197	-0.445021119	-0.407804438	-0.460359273	2.585606148	-0.460359273	-0.290659358	-0.424535274	0.310053786	1
COL12A1	-0.064166705	-0.630949554	-0.57596641	-0.200109946	2.437232115	-0.63821666	-0.586782651	-0.370889527	0.629849339	1
COL1A2	-0.455102795	-0.459303656	-0.45992968	-0.423492815	2.51885844	-0.455841083	-0.460184329	-0.354065917	0.549061836	1
COL2A1	-0.399447956	-0.4914966	-0.426115819	-0.376939206	2.563337462	-0.468544473	-0.314532573	-0.480354898	0.394094064	1
COL3A1	-0.358111603	-0.455624064	-0.455506663	-0.455349601	2.507376769	-0.455055732	-0.455358514	-0.455715478	0.583344887	1
COL4A5	-0.171771574	-0.982676484	-0.557288231	0.153384273	2.263798455	-0.861599354	-0.613903387	0.129844951	0.640211352	1
COL5A1	-0.423092022	-0.763557191	-0.082306507	-0.472797008	2.279262883	-0.777177991	0.00291234	-0.649926294	0.88668179	1
COL5A2	-0.378822759	-0.465739869	-0.46780155	-0.39394878	2.530485737	-0.451308173	-0.458518173	-0.428660994	0.51431456	1
COL6A3	0.281137961	-0.447406919	-0.722530821	-0.682183388	2.243795932	-0.663185327	-0.042572003	-0.776173138	0.809117703	1
COMMD3	-0.679032917	0.554079247	-0.35519419	-0.170125657	1.91237871	0.366470926	-0.876223915	-1.433182794	0.68083059	1
COX5A	-0.099203022	-0.792957646	-0.96377493	0.170695547	2.192661631	-0.753960257	-0.703543578	0.273975172	0.676107084	1
COX6B2	-0.534596244	-0.560983341	-0.535993525	-0.40773206	1.721613029	-0.534665082	-0.539623619	-0.407674587	1.799655429	1
COX7B	0.028084995	-0.970944453	-0.74702262	-0.247381551	1.894140542	-0.843186976	-0.691410449	0.332869254	1.244851259	1
CPE	-0.467416573	-0.390183467	-0.44977441	-0.390136977	2.613602233	-0.337356513	-0.331701881	-0.431339236	0.184306824	1
CPNE9	-0.47128049	-0.646982874	-0.314186105	-0.464760316	1.64720665	-0.60317187	-0.398085859	-0.604448331	1.855709194	1
CPSF4	-0.577070859	-0.646708879	-1.28145264	0.464238102	1.237103611	-0.414690555	-0.945474306	0.605983886	1.558071639	1
CPT1A	-1.077551482	0.337964996	-0.362632976	-0.92061676	2.028437933	0.4282044	-0.019589101	-1.032194415	0.617977406	1
CPXM1	-0.516921711	-0.481029479	-0.080105288	-0.49665206	2.585021637	-0.413461026	-0.260855816	-0.535790921	0.199794665	1
CPXM2	-0.363212714	-0.433805995	-0.549913667	-0.475228089	2.47557096	-0.290544319	-0.549913667	-0.462747817	0.649795307	1
CR2	-0.751850941	-0.751850941	-0.751850941	0.080810939	1.068157312	-0.751850941	0.195923498	-0.427916555	2.09042857	1
CRACR2B	-0.310682157	-0.726961648	-0.662373239	-0.176897914	1.817911087	-0.791631521	-0.791631521	0.11463143	1.527635482	1
CRB1	-0.795446564	1.293284298	-0.000240674	-0.098783928	1.94549474	0.042031818	-0.795446564	-0.795446564	-0.795446564	1
CRB3	0.164718392	-0.277119142	-1.376998355	-0.061477352	1.751190267	0.029079494	-1.43570071	0.338738667	0.86756874	1
CRIP3	-0.520443472	-0.578407539	-0.561939133	-0.333138064	1.465090648	-0.578407539	-0.578407539	-0.32582957	2.011482208	1
CRNDE	-0.627774076	-0.464388028	-0.627774076	-0.46428967	2.159473944	-0.627774076	-0.627774076	0.135439289	1.144860769	1
CRYBA4	-0.495111641	-0.495111641	-0.495111641	-0.495111641	1.359909131	-0.495111641	-0.495111641	-0.495111641	2.105872359	1
CRYGEP	-0.440759404	-0.432135458	-0.42588148	-0.432108972	2.468528059	-0.476135001	-0.476135001	-0.476135001	0.690762258	1
CRYM	-0.49212598	-0.50303096	-0.50303096	-0.50303096	1.953179714	-0.50303096	-0.50303096	-0.50303096	1.557132025	1
CSMD3	-0.74090422	-0.74090422	-0.333222032	-0.74090422	2.069520057	-0.74090422	1.001400969	-0.324059485	0.549977372	1
CTHRC1	-0.469681772	-0.51434274	-0.452862875	-0.488216877	2.238518903	-0.503845977	-0.438207702	-0.527393887	1.156032926	1
CTPS2	-0.209820407	-0.907000537	0.623410765	-0.435235781	1.714562998	-0.985791845	-0.167504838	-0.945070702	1.312450349	1
CXADR	-0.31754036	-0.546997708	-0.565555711	-0.366903229	2.189387655	-0.540402186	-0.570308871	-0.500139873	1.218460282	1
CXCL12	-0.44637647	-0.44637647	-0.442701005	-0.44637647	2.49276447	-0.44637647	-0.44637647	-0.44637647	0.628195353	1
CXorf40B	-0.409681749	0.300689728	-1.163531811	0.106093677	0.772711768	0.967148543	-1.706134783	-0.237332588	1.370037215	1
CXXC4	-0.485214858	-0.485214858	-0.485214858	-0.485214858	2.402095857	-0.485214858	-0.331788828	-0.485214858	0.840982116	1
CYP1B1	-0.747223657	0.301243003	-0.75564711	-0.779314905	1.838074068	1.232866563	-0.759642025	-0.731956326	0.401600389	1
CYP27B1	-0.011913406	0.62192039	-1.173681058	0.37655284	1.640973471	-0.924570543	-0.917697448	-0.708157682	1.096573436	1
CYP4V2	-0.548773409	-0.524894527	-0.368430661	-0.443551939	2.444140762	-0.353636703	-0.32956701	-0.599300222	0.724013709	1
CYP4X1	-0.638360834	-0.170270489	-0.638360834	-0.638360834	1.818649261	-0.075317132	-0.638360834	-0.638360834	1.618742531	1
DACH1	-0.616857112	-0.587803577	-0.05883146	-0.439393433	1.209138273	-0.736035285	-0.157204063	-0.736035285	2.123021942	1
DAGLB	-0.669944507	1.161254747	-1.020912826	-0.905125898	1.462236483	0.975207714	-0.684983279	-0.763970018	0.446237584	1
DANT1	-0.351165864	-0.351165864	-0.351165864	-0.351165864	2.663566474	-0.351165864	-0.351165864	-0.351165864	-0.205405426	1
DAZAP2P1	-0.925766088	0.769028745	-0.208206619	-0.70235849	2.09284284	0.21865462	-1.139563822	-0.428489724	0.323858538	1
DBN1	0.084455747	-0.742606661	-0.570865058	-0.051539124	2.436632815	-0.725574335	-0.415075604	-0.495983805	0.480556025	1
DBP	-0.796613482	-0.303423802	-0.460008506	-0.729991442	1.714492508	-0.261239504	-0.334320329	-0.58141001	1.752514567	1
DCC	-0.793427774	-0.365450422	-0.793427774	-0.365192913	2.014642831	1.265746773	-0.375624712	0.206161765	-0.793427774	1
DCHS1	-0.520568595	-0.479113891	-0.500428649	-0.538657255	2.284363457	-0.568455831	-0.190511052	-0.533677787	1.047049602	1
DCLK2	-0.155098287	-0.628076965	-0.628076965	-0.039440321	2.459822872	-0.628076965	0.520517713	-0.628076965	-0.273494116	1
DCN	-0.28064684	-0.472550948	-0.471798527	-0.472547762	2.485250701	-0.475014593	-0.471528398	-0.475097046	0.633933412	1
DCX	-0.527797338	-0.527797338	0.067456361	-0.527797338	2.549812455	-0.527797338	0.235380764	-0.527797338	-0.21366289	1
DDTL	-0.357313566	1.549874583	-0.539641737	-0.612908839	1.834314632	-0.48583641	-0.712114672	-0.821275994	0.144902002	1
DDX19B	-0.727748639	0.14919789	0.847996315	-1.180059661	1.321671114	0.765445992	-0.301344704	-1.562301696	0.687143389	1
DDX21	0.105462147	-0.727347617	-0.680146931	-0.173629615	1.121794683	-0.837009634	-0.780814234	-0.12199773	2.09368893	1
DDX25	-0.507389516	-0.518234079	-0.502828617	-0.477744891	1.51726808	-0.518234079	-0.491898836	-0.486730678	1.985792617	1
DDX28	-0.448769513	0.485211769	-0.654242908	-0.58584344	1.198811349	-0.638334482	-1.415916427	0.388223844	1.670859808	1
DENND1C	-0.340867294	-0.410314448	-1.016877023	-0.382626236	0.970348454	-0.092080084	-1.092584172	0.289583724	2.075417079	1
DENND2C	-0.176839474	-0.587904058	-0.921316499	-0.267542987	1.749292412	-0.729984046	-0.765735521	0.115715949	1.584314224	1
DENND3	-0.095703664	-0.624355911	-0.93939055	0.230678971	1.926109846	-0.67289473	-0.797550121	-0.348046424	1.321152583	1
DEPTOR	-0.502129595	-0.506694859	-0.497662179	-0.50669414	1.888268429	-0.50286263	-0.502061378	-0.502311977	1.632148327	1
DGKK	-0.665430228	-0.665430228	-0.665430228	-0.665430228	1.466930804	-0.665430228	-0.665430228	1.232212455	1.293438111	1
DHDH	-0.061431647	-0.344278464	-0.835874684	0.571678448	2.310910622	-0.562836685	-0.824433909	-0.618405782	0.364672101	1
DHX35	-0.417296236	-0.450030192	0.684219017	-1.086980095	1.455270538	-0.842535454	0.332399168	-1.058729834	1.383683089	1
DIAPH2	-0.343369308	-0.791218622	-0.855075924	-0.032576604	1.414305151	-0.768613049	-0.370694004	-0.191504982	1.938747342	1
DIRAS3	-0.777614309	-0.854622006	-0.635832318	0.00792422	2.036215151	-0.854622006	-0.293599046	0.263912794	1.108237521	1
DISP1	-0.992842262	-0.850666977	-0.166937163	0.129685279	2.099818298	-0.326950917	0.888612368	-0.95401574	0.173297115	1
DKC1	0.011160177	-1.031218623	-0.540010699	-0.176254316	1.565211142	-0.892722744	-0.655048411	0.004872247	1.714011227	1
DKK2	-0.469799873	-0.469799873	-0.469799873	-0.469799873	2.368031032	-0.469799873	-0.469799873	-0.469799873	0.920568079	1
DLG3	-0.366548249	-0.6870775	-0.604944869	-0.206912977	1.988888427	-0.679560625	-0.647534263	-0.241831539	1.445521595	1
DMKN	-0.474625143	-0.50542077	-0.595996492	0.068625315	2.355648361	-0.54152187	-0.551785254	-0.578367337	0.823443189	1
DNAH3	-0.403984845	-0.526748163	-0.663505219	-0.321433625	2.128747868	-0.412695991	-0.684378541	-0.410874628	1.294873142	1
DNAJA3	0.177289549	-0.019707184	-1.11195573	0.2607326	1.683759211	0.03788526	-1.864307325	0.449207869	0.38709575	1
DNAJB4	-0.710856814	-0.092884873	-0.273781866	-0.556392366	2.043973957	-0.140413698	-0.785532037	-0.779806082	1.295693778	1
DNAJC2	-0.296354523	-0.93862738	-0.577800842	-0.264780337	1.365304414	-0.904035776	-0.03247275	-0.312626135	1.961393329	1
DNAJC27	-0.992074102	0.771282246	-1.041143841	0.05839806	1.347825633	0.630649494	-1.074210859	-0.830276035	1.129549404	1
DNAJC3-AS1	-0.749417873	0.221446602	-1.084692594	-0.52930762	1.125968093	1.010085481	-0.663158994	-0.886305731	1.555382637	1
DNM1	-0.052774679	-0.771469448	-0.758103826	0.287097199	2.21937819	-0.837225616	-0.819603758	0.067904286	0.664797652	1
DNM3	-0.344272309	-0.487592558	-0.683380778	-0.32124501	2.327270736	-0.778219653	-0.535032748	-0.050941903	0.873414223	1
DNMBP	-0.079356687	-0.355534721	-0.996312254	-0.055404503	1.354394981	-0.449803175	-0.914405855	-0.451602079	1.948024293	1
DNMT3A	-0.740440896	0.132735698	-0.83453148	-0.848863232	1.295089181	1.090021106	-0.643244487	-0.862731268	1.411965378	1
DOK6	-0.530999582	-0.211426653	-0.530999582	-0.530999582	2.19484211	-0.530999582	-0.530999582	-0.530999582	1.202582034	1
DPEP1	-0.491752066	-0.45208915	-0.370950741	-0.491752066	2.527017064	-0.300917498	-0.440125381	-0.491752066	0.512321903	1
DPEP3	-0.761697138	-0.546307797	-0.761697138	-0.546178145	2.20607651	0.922333465	-0.656562683	-0.13286433	0.276897256	1
DPF1	-0.14325879	-0.62278157	-0.619156034	-0.218088768	2.252037967	-0.696727687	-0.641830654	-0.345653613	1.035459149	1
DPPA2	-0.515506871	-0.711234282	0.207605323	-0.479889157	1.460512319	-0.826822364	-0.376204701	-0.649276	1.890815732	1
DPPA4	-0.536277113	-0.617732109	-0.335677032	-0.319737456	1.964813928	-0.685330852	-0.527915121	-0.45786158	1.515717335	1
DPPA5	-0.503063192	-0.503163536	-0.503116021	-0.503163536	1.644614183	-0.503163536	-0.503163536	-0.502872037	1.877091213	1
DPYD	-0.209319193	-0.494199686	-0.962754443	-0.493917656	2.111555211	-0.399152151	-0.962754443	0.678789754	0.731752607	1
DQX1	-0.473865474	-0.695746067	0.59384874	-0.898346682	0.602066426	-0.806855994	0.386209419	-0.791278971	2.083968602	1
DTNB	-0.505271138	-0.418201585	-0.589975587	-0.529355378	1.582981517	-0.380136355	-0.551573133	-0.532805081	1.924336741	1
DUSP16	-0.401542164	-0.294025884	-0.932720916	-0.673916747	1.376443924	0.059426485	-0.659801042	-0.447338312	1.973474656	1
DYNC2LI1	0.218755173	-0.518392617	-0.630260731	0.336448336	0.651877076	-0.523721989	-1.08541476	-0.655254477	2.205963989	1
DZANK1	-0.34402659	-0.768144378	-0.506190288	-0.015273225	1.135486564	-0.966945503	-0.311674039	-0.363661135	2.140428595	1
EAPP	-1.266351421	1.070056332	-0.166281979	-0.458863103	1.077929202	0.198812881	-0.753049811	-1.116088428	1.413836326	1
EBF1	-0.418484135	-0.418484135	-0.411987027	-0.412792159	2.586103408	-0.41506289	-0.412930816	-0.418484135	0.322121888	1
ECE2	-0.479300206	0.168883971	-0.418739815	-0.680446024	2.289113681	-0.040018937	-0.407542382	-1.111066037	0.679115748	1
EFNB3	-0.476981812	-0.690227575	-0.60367598	-0.121532642	2.044453665	-0.690227575	-0.579259291	-0.247743414	1.365194623	1
EFR3B	-0.526717691	-0.426883557	-0.507365381	-0.504495883	1.725890866	-0.497371305	-0.529432325	-0.533040024	1.799415301	1
EGFLAM	-0.419186717	-0.430753113	-0.42804913	-0.421224072	2.633267873	-0.358245882	0.014510102	-0.43866882	-0.151650241	1
EID3	-0.450493532	-0.586012253	-0.481516613	-0.395544541	2.28585873	-0.562461047	-0.529535861	-0.341725294	1.061430412	1
EIF3G	-0.348836855	0.617586319	-0.520378279	-1.665070348	1.223965761	1.145048146	-0.374747916	-0.905090353	0.827523524	1
EIF4EBP3	-0.619599836	-0.538620981	-0.228077759	-0.538554389	1.915426822	-0.560535959	-0.397255046	-0.606184213	1.573401361	1
ELF2	-0.728731419	-0.764031313	0.629426966	-0.553384008	1.147060921	-1.27929138	1.341733117	-0.735659603	0.942876719	1
ELF3	-1.168100299	-0.036227627	-0.801363	-0.068612543	0.816432464	-0.225105605	-0.864318204	0.233391598	2.113903218	1
EML6	-0.439884464	-0.789064666	-0.665216465	-0.237987555	1.947244845	-0.815670326	-0.399659878	-0.037303646	1.437542154	1
EMP1	-0.416494166	-0.416494166	-0.416494166	-0.409326926	2.591367649	-0.416494166	-0.416494166	-0.399764333	0.300194441	1
EMP3	0.282073491	-0.54067137	-0.521392245	-0.162284928	2.377060553	-0.863435578	-0.504812156	-0.615048878	0.548511111	1
ENO1P3	-0.442157783	-0.542958882	-0.66538687	-0.452606649	1.006369925	-0.714138606	-0.064213715	-0.399842176	2.274934755	1
ENO2	-0.231956367	-0.805225529	-0.704326291	0.021718847	1.905139663	-0.776664823	-0.78028476	-0.027996174	1.399595435	1
ENOX1	-0.500229343	-0.646408834	0.18422406	-0.646408834	2.455231479	-0.427711631	-0.646408834	-0.2217582	0.449470137	1
ENPP2	0.245064403	-0.38366866	-0.596397416	-0.575766234	2.307049406	-0.623826769	-0.600381883	-0.595780942	0.823708096	1
EPB41L1	0.951583468	-0.564141008	-1.164573999	0.028201819	1.397537991	-0.571314845	-1.136375178	-0.272804802	1.331886554	1
EPB41L4A	-0.024485269	-0.662282921	-0.491648117	-0.15827473	2.480599382	-0.724932559	-0.666772353	-0.140511996	0.388308563	1
EPB41L4A-AS1	-0.59900548	-0.467668115	-0.833854464	-0.051214557	1.922215368	-0.194626521	-0.987099059	-0.195566483	1.406819309	1
EPC1	-1.008102315	0.558074824	-0.530312172	-1.359870422	1.152914809	0.12025634	1.084580367	-1.014171402	0.996629971	1
EPHA3	-0.449644782	-0.449644782	-0.437002779	-0.449644782	2.491658867	-0.44298776	-0.444241988	-0.449644782	0.631152788	1
EPHA4	-0.438308961	-0.450457803	-0.450457803	-0.427778386	2.494119775	-0.450457803	-0.450457803	-0.450457803	0.62425659	1
EPHA7	-0.460539415	-0.460539415	-0.460539415	-0.460539415	2.423971259	-0.460539415	-0.460539415	-0.460539415	0.799804643	1
EPHA8	-0.422349265	-0.276526394	-0.25579952	-0.422349265	2.639352757	-0.422349265	0.004719481	-0.422349265	-0.422349265	1
EPHB1	-0.450388524	-0.197207488	-0.279724799	-0.081638025	2.634048785	-0.543083102	-0.543083102	-0.27380585	-0.265117895	1
EPHB2	-0.994398746	-0.383847228	-0.38207092	-0.672243912	1.8437035	-0.184435722	0.209306736	-0.864705085	1.428691376	1
EPHX1	-0.273352569	-0.115172124	-0.759406874	-0.242539337	2.462259108	-0.109587178	-0.908531642	-0.45978412	0.406114736	1
EPHX3	-0.302089174	-0.757234092	-0.561592545	-0.048636746	1.313724536	-0.960527246	-0.289429299	-0.421048246	2.026832813	1
EPPK1	-0.350745476	-0.598930506	-0.607615062	-0.357490546	1.933118315	-0.607067818	-0.630442441	-0.332521726	1.55169526	1
ERN2	0.016452751	-0.696933184	-0.494250221	-0.519367005	0.93316673	-0.696933184	-0.350451899	-0.489694951	2.298010964	1
ESCO1	-0.846724014	0.340996469	-0.569588295	-0.780605142	1.588918966	-0.047202744	-0.386828529	-0.936097693	1.637130983	1
ESRG	-0.42986557	-0.430007341	-0.430240517	-0.429540567	2.547925135	-0.430240517	-0.430012884	-0.430240517	0.462222777	1
ETV3	-1.033524344	0.511958285	-0.833522331	-0.608348864	0.286746869	0.737922199	-0.744122563	-0.385002008	2.067892757	1
EVA1C	-0.346031031	-0.456455343	-0.456455343	-0.31902885	2.607449617	-0.456455343	-0.322376592	-0.456455343	0.205808228	1
EVC2	-0.546901806	-0.335630611	-0.546901806	-0.494052216	1.948267753	-0.546901806	-0.546901806	-0.485220823	1.55424312	1
EXOSC5	-0.411982075	-1.326508851	0.28570695	-0.922030823	0.816941264	-0.469591948	0.47647118	-0.41217908	1.963173383	1
F3	0.399414864	-0.687273213	-0.644771317	-0.211657353	2.366961189	-0.679647708	-0.637877376	-0.417215392	0.512066308	1
F8	-0.548164816	-0.564568758	-0.598725102	-0.405162435	1.706966474	-0.548415346	-0.294378133	-0.551206097	1.803654213	1
FA2H	-0.452982484	-0.480747245	-0.508237162	-0.439470999	0.970784573	-0.508237162	-0.494818961	-0.427979886	2.341689325	1
FAAH	-0.61973862	-0.516158342	-0.290088702	-0.124388428	1.865196752	-1.19728483	1.106560938	-0.849559907	0.625461139	1
FAAHP1	-0.449042302	-0.407062309	-0.479504602	-0.488759492	0.604208575	-0.43620767	-0.442477287	-0.401464109	2.500309195	1
FABP6	0.429815041	-0.527502682	-0.959505887	-0.52724263	0.741185415	1.638675036	-0.959505887	-0.959505887	1.123587481	1
FAM102B	-0.425017554	-1.126477333	-0.284171554	-0.181470905	1.820390334	-1.042297937	0.05937035	-0.227835269	1.407509868	1
FAM103A1	-0.54703975	-0.503795266	-0.723954995	-0.147755943	1.988587619	-0.443193933	-0.78333529	-0.2750672	1.435554758	1
FAM107A	-0.280904822	-0.659147179	0.41549247	-0.659147179	2.118930118	-0.659147179	-0.659147179	-0.659147179	1.042218129	1
FAM109B	-0.794202912	-0.802576273	-0.546279654	-0.770317478	1.64507054	-0.084166888	1.632673444	-0.595667411	0.315466632	1
FAM118A	-0.343055028	-0.343508837	-1.043828911	-0.132879032	-0.507305082	0.161857286	-0.885757271	0.914362637	2.180114238	1
FAM120C	-0.203240378	-0.97332365	-0.608671194	-0.513295235	2.21081286	-0.896516222	0.011591373	0.160134207	0.812508238	1
FAM122C	-0.844061957	0.034936243	-0.239361124	-0.802323974	0.740227262	0.011095171	-0.401356613	-0.790665899	2.291510892	1
FAM124B	-0.507350419	-0.474173164	-0.507350419	-0.507350419	1.321200235	-0.507350419	-0.442573348	-0.507350419	2.132298371	1
FAM126B	0.401068817	0.587562456	-1.937177555	0.256023204	1.290863385	0.200930298	-1.331349953	0.431812455	0.100266893	1
FAM136A	0.500114327	-0.576612016	-0.601694369	-0.758532296	1.674962688	-0.619148739	-0.785577228	-0.415173291	1.581660924	1
FAM159B	-0.601696797	-0.415814813	-0.601696797	-0.229709049	1.349695341	-0.601696797	-0.601696797	-0.384622568	2.087238276	1
FAM162A	-0.27929429	-0.816972626	-0.81718407	0.041838766	1.511922942	-0.631638848	-0.746051454	-0.088988351	1.826367932	1
FAM196B	-0.358240422	-0.358240422	-0.358240422	-0.358240422	2.660505918	-0.358240422	-0.358240422	-0.358240422	-0.152822961	1
FAM20A	-0.420520456	-0.555053171	-0.573052427	-0.603328012	2.013915528	-0.556737505	-0.519850769	-0.243852964	1.458479776	1
FAM46B	-0.395539236	-0.689010822	-0.668917322	-0.17877664	1.954930267	-0.670093393	-0.570642028	-0.271648339	1.489697513	1
FAM71E1	-0.579522358	-0.538660425	-0.563776225	-0.200973452	2.265210001	-0.547704915	-0.595843777	-0.304861	1.066132151	1
FAM84B	0.111246054	0.002951435	-0.992063852	-0.410059133	1.197833017	-0.173232392	-1.089535444	-0.601900792	1.954761106	1
FAM86GP	-0.675524243	-0.613468926	-0.250270072	-0.427153553	1.197416814	-0.675524243	-0.554364076	-0.168243915	2.167132214	1
FAR2P2	-0.578840145	-0.578840145	-0.578840145	0.043584605	0.645590093	-0.578840145	-0.578840145	-0.215622857	2.420648886	1
FASTKD5	0.972205447	0.591670459	-1.168079333	0.156540263	0.777841998	-0.398541895	-1.992219338	0.428804172	0.631778229	1
FAT1	-0.481675158	-0.734605187	-0.640407895	-0.539844654	1.811481936	-0.680324717	0.011184306	-0.371868311	1.62605968	1
FAT4	-0.429891775	-0.429891775	-0.429891775	-0.301899279	2.591540821	-0.429891775	-0.429891775	-0.429891775	0.28970911	1
FAXC	0.009835673	-0.752285976	-0.715635766	-0.253521948	2.265247656	-0.69471579	-0.737899448	0.044020026	0.834955574	1
FAXDC2	-0.373368034	-0.935688018	-0.432021608	0.443144713	2.09703274	-1.135780233	0.592406486	-0.643070717	0.387344671	1
FBLN2	-0.183531478	-0.611039791	-0.602435354	0.012091525	2.540148535	-0.605007493	-0.581793695	-0.174612026	0.206179776	1
FBLN7	-0.813224295	-0.604942528	-0.088152046	-0.202059352	2.477779257	-0.620120164	0.328289392	-0.537417307	0.059847043	1
FBN1	-0.504803309	-0.758434165	-0.456463871	-0.683989591	2.065755512	-0.762278379	0.567203253	-0.502118948	1.035129499	1
FBP1	-0.51230828	-0.449127792	-0.490988045	-0.506561142	1.285303639	-0.472582672	-0.498290438	-0.51230828	2.156863009	1
FBXL20	-1.219588172	0.962444335	-0.339032793	-0.965486138	1.513046264	0.214418768	-0.187826253	-1.030235633	1.052259622	1
FBXO36	-0.48025164	-0.296274174	-0.543143282	-0.583746052	2.034744925	-0.363968329	-0.597753299	-0.6024169	1.432808751	1
FBXO45	-0.941226483	0.526773546	-1.319922215	-1.154780029	0.662125243	1.24260625	0.192030462	-0.448667704	1.241060931	1
FCGBP	-0.514003141	-0.495907611	-0.526167674	-0.511028535	2.015197498	-0.507968478	-0.467086284	-0.473160817	1.480125042	1
FCGRT	-0.854935981	-0.787119679	0.829825686	0.016330216	2.079330858	-0.921367278	-0.237911706	-0.663659969	0.539507853	1
FCRL5	-0.914510979	0.127501594	-0.121096716	-0.219417771	2.276049774	0.338876597	-0.914510979	-0.914510979	0.341619461	1
FGF13-AS1	-0.502908332	-0.502908332	-0.502908332	-0.502908332	1.888866951	-0.502908332	-0.502908332	-0.502908332	1.631491375	1
FGF2	-0.451813407	-0.478449712	-0.497313979	-0.440687106	2.572265894	-0.361168365	-0.497313979	-0.166866668	0.321347322	1
FGFR3	-0.736943529	-0.708824519	-0.285925147	-0.667627437	1.357527986	-0.741706193	0.879479591	-0.742118173	1.646137421	1
FGGY	0.272510468	-0.958951987	-0.663523197	-0.415060591	1.447254051	-0.745066404	-0.450245518	-0.338107028	1.851190207	1
FHL1	-0.485932746	-0.558986101	-0.445474384	-0.180822391	2.593619004	-0.521571879	-0.180690651	-0.396848101	0.176707248	1
FILIP1	-0.408773012	-0.516511454	-0.536110843	-0.481074352	1.987459547	-0.530653507	-0.532157838	-0.494710801	1.51253226	1
FKBP10	-0.481117698	-0.446125189	-0.431440654	-0.494673836	2.482309236	-0.419162275	-0.359103232	-0.500232844	0.649546493	1
FKBP11	-0.963861378	-0.235470835	0.965451992	-0.895018595	0.88290359	-0.860597045	0.320074365	-0.901049755	1.687567661	1
FKBP7	-0.542857464	-0.950897826	0.041845739	-0.201915835	2.168271007	-1.046158166	0.787186145	-0.521714309	0.266240709	1
FLRT3	-0.403278977	-0.528287543	-0.528287543	-0.486401417	1.72392811	-0.528287543	-0.528287543	-0.521303903	1.800206358	1
FLYWCH2	-0.797294145	-0.727053435	-0.512112843	-0.997958273	0.850083132	-0.241734239	1.550109004	-0.564508181	1.440468981	1
FMC1	-0.449272033	0.604504128	-0.764544347	-0.802693824	0.886807322	1.169858808	-0.853586189	-1.179759004	1.38868514	1
FNDC10	-0.615829179	-0.624200658	-0.460841326	-0.576737982	1.781703275	-0.573077509	-0.097645045	-0.533197463	1.699825888	1
FOLR3	-0.62613475	-0.060649786	-0.600677097	-0.648646606	1.739639262	-0.261330158	-0.607645289	-0.648646606	1.714091029	1
FOXA3	-0.54380101	-0.435709938	-0.616464121	-0.209522396	1.399693825	-0.616464121	-0.572349838	-0.458149656	2.052767255	1
FOXD3-AS1	-0.378640633	-0.401201639	-0.51072172	-0.072377689	2.615143794	-0.313116946	-0.51072172	-0.478747148	0.050383701	1
FOXH1	-0.494301123	-0.49704437	-0.49704437	-0.49704437	2.077464682	-0.49704437	-0.49704437	-0.49704437	1.399102662	1
FOXO1	-0.945476416	-0.293998253	-0.437919204	-0.659248045	1.882939671	-0.591494649	0.581259083	-0.781058528	1.244996341	1
FOXP1	-0.409740314	-0.703370508	-0.656112364	-0.107621358	2.284506971	-0.693326031	-0.630364622	0.022852927	0.893175298	1
FOXP2	-0.381260999	-0.396134306	-0.468335238	-0.432213042	2.610903866	-0.251217545	-0.397850728	-0.468335238	0.184443229	1
FRAT2	-0.684684112	-0.592925209	-0.481196832	-0.557026185	1.904792687	-0.610937216	0.021526468	-0.533076656	1.533527055	1
FRMPD3	-0.522917656	-0.599311883	-0.237567335	-0.567620225	1.811309079	-0.599311883	-0.413794003	-0.562324415	1.691538322	1
FSCN1	-0.575250159	-0.665567578	-0.516876284	-0.053648935	2.509802448	-0.637768367	-0.183058949	-0.262245688	0.384613513	1
FST	-0.26271516	-0.683156513	-0.795766294	-0.21864808	0.77651065	-0.666651337	-0.008820122	-0.485890069	2.345136925	1
FSTL4	-0.72724886	-0.72724886	-0.501647823	-0.52960464	2.188784941	-0.430256561	-0.582626685	0.310772408	0.999076078	1
FTLP14	-0.28895722	-0.481348857	-0.464981906	-0.323324921	2.558566942	-0.486226231	-0.466889572	-0.449034143	0.402195908	1
FTLP2	-0.766057876	1.128101079	-0.717815239	-0.704662058	1.667213708	0.932212508	-0.896054432	-0.806503	0.163565312	1
FUCA1	-0.710948356	-0.53386949	-0.716546172	-0.340557033	2.014746488	0.50127755	-0.805484682	-0.554592627	1.145974322	1
FUNDC2	-0.870550575	0.011314679	-0.943301104	-0.580638628	1.668850669	0.352411762	-0.494329724	-0.68876283	1.54500575	1
FUT2	-0.5742733	-0.837113917	-0.342187567	0.319736831	1.386320051	-0.952299815	-0.385531075	-0.493314311	1.878663103	1
FXYD4	-0.494429873	-0.516331348	-0.582203107	-0.169588115	0.937584209	-0.463066969	-0.596352234	-0.45362706	2.338014497	1
FZD5	-0.136032373	-0.816317025	-0.709195252	0.516923561	1.819253384	-0.816838956	-0.822361672	-0.362277945	1.326846279	1
G3BP2	-0.426652032	-0.302393857	-0.842375018	-0.924935085	1.234451929	1.126400674	-0.844062951	-0.553422946	1.532989286	1
G6PC3	-0.551576469	-0.835519801	-0.219329646	-0.201880884	1.750507311	-0.802968462	-0.429914276	-0.399172622	1.689854849	1
GABRA5	-0.499830971	-0.499830971	-0.499830971	-0.499830971	2.00467641	-0.499830971	-0.499830971	-0.499830971	1.494140387	1
GABRP	-0.492066057	-0.353634674	-0.492066057	-0.492066057	0.961188956	-0.492066057	-0.492066057	-0.492066057	2.344842059	1
GAL	-0.396922479	-0.587134882	-0.514428695	-0.452712975	2.429490822	-0.550066143	-0.226905928	-0.453590032	0.752270312	1
GALNT14	-0.449280519	-0.685616594	-0.685616594	-0.391489019	2.400282083	-0.685616594	0.462233722	-0.34233906	0.377442576	1
GALNT6	-0.24578937	-0.520442551	-0.893021055	-0.535522023	1.490204151	0.415082198	-0.618385081	-0.849316292	1.757190024	1
GALNTL6	0.60420399	0.328510954	-1.009812455	-1.009812455	0.746405203	-1.009812455	0.949949046	-1.009812455	1.410180627	1
GAP43	-0.427029137	-0.43064247	-0.43064247	-0.43064247	2.547607366	-0.43064247	-0.43064247	-0.43064247	0.463276594	1
GAPDHP65	0.41050099	-0.702397992	-0.510054994	-0.329223956	2.433884845	-0.644473749	-0.519367235	-0.488394074	0.349526165	1
GATM	-0.746109946	0.486518535	-0.640484355	1.112536001	1.974614924	-0.809388479	-0.69231041	-0.723664036	0.038287767	1
GCAT	-1.0030508	0.587198063	-0.730621906	-0.648177278	1.482221965	1.317198218	-0.794365408	-0.85018505	0.639782195	1
GCDH	-1.000048075	-0.158478709	-0.282742483	0.548702382	1.952224426	-0.277270682	-0.941269805	-0.871111194	1.029994141	1
GCHFR	-0.342902108	-0.71610384	-0.791739211	-0.451478014	2.097777803	-0.583007569	-0.56112203	0.138481845	1.210093124	1
GCNA	-1.033768619	0.946988621	-0.812195275	-0.999487061	0.820879576	0.298829011	0.421451278	-1.119675319	1.476977789	1
GCNT1	-0.664161634	-0.276069929	-0.518014158	-0.629506782	1.647169847	-0.322113671	-0.40432797	-0.672807393	1.839831689	1
GCNT2	-0.148152313	-0.17720438	-1.010423127	-0.161231464	2.063353796	0.003701446	-1.137880654	-0.486232542	1.054069239	1
GDI1	-0.960989306	0.035755835	-0.470148816	-1.206517009	0.980100401	1.616073502	-0.168913586	-0.85672138	1.031360359	1
GDPD2	-0.487706411	-0.531005256	-0.523296641	-0.418093352	1.73062162	-0.52444312	-0.532310849	-0.508162473	1.794396482	1
GFPT1	-1.041157279	0.453875122	-0.374665064	-0.927349058	1.144363311	0.231499167	-0.522114591	-0.812206175	1.847754567	1
GFY	-0.537455453	-0.836267116	-0.730146377	0.372344145	0.667496854	-0.351964907	-0.806032008	-0.040557989	2.262582851	1
GGNBP2	-1.078727508	0.563434975	-0.509721614	-1.062609781	1.114184812	0.346608402	1.165649167	-1.33347842	0.794659968	1
GGT1	-0.481341487	-0.381258825	-0.617950871	-0.260146577	1.51540763	-0.513162832	-0.658554716	-0.567218611	1.964226289	1
GHITM	-0.278834838	-0.273336894	-0.77430535	-0.264518893	1.921115882	-0.036951526	-1.281799789	-0.328563593	1.317195001	1
GIGYF1	-0.899087431	-0.400502639	-0.300692472	-0.241972119	2.340196526	-0.73767902	0.078139799	-0.568208318	0.729805673	1
GIP	-0.637127008	0.495058386	-0.861248648	-0.820720867	1.714497364	0.73111009	-0.764893949	-0.89381619	1.037140822	1
GIPC2	-0.430321766	-0.812351416	-0.594337109	0.231282636	0.942688952	-0.804795274	-0.740509153	0.049401752	2.158941376	1
GJA1	-0.28830919	-0.597158651	-0.609668718	-0.318542456	1.976940712	-0.591582238	-0.610609725	-0.459390757	1.498321023	1
GJA4	-0.591330109	-0.591330109	-0.591330109	-0.591330109	2.184310853	0.998821211	-0.591330109	-0.591330109	0.364848591	1
GJB5	-0.702019037	0.720361919	-0.994823774	-0.500198118	0.758162763	1.214247416	-1.044812541	-0.833789025	1.382870396	1
GLS2	-0.173799027	-0.385732514	-0.734308223	-0.211129917	2.467626196	-0.734308223	-0.223874638	-0.530773699	0.526300045	1
GMFB	-0.26244917	-0.871531929	0.625445459	-0.771209602	0.937376306	-0.819801129	0.557237993	-1.136521879	1.741453951	1
GMPPB	-0.455134317	0.957719567	-0.723774269	-1.856835369	0.657800575	0.375204015	0.20126333	-0.56148084	1.405237308	1
GNA14	-0.49907911	-0.252543824	-0.589340539	-0.589340539	2.504394789	-0.589340539	-0.15095376	-0.327131555	0.493335076	1
GNAL	-0.932631825	-0.593329894	0.475421267	-0.879849363	1.673951782	-0.526149715	0.373334189	-0.908011186	1.317264745	1
GNG2	-0.438700319	-0.470447781	-0.425348279	-0.430937079	2.457202023	-0.470447781	-0.470447781	-0.470447781	0.719574779	1
GNPDA1	-0.978689634	0.713900064	-0.093654823	-0.87541249	1.629078537	0.715322874	-0.027117582	-1.542755184	0.459328237	1
GPANK1	-1.174493766	0.653724182	0.418853494	-1.262813625	1.561316897	-0.058496568	0.156639177	-1.125621413	0.830891621	1
GPC4	-0.581037782	-0.56442881	-0.275577397	-0.556292454	2.458947941	-0.561658368	0.184277813	-0.579910679	0.475679736	1
GPCPD1	-0.439774721	-0.444422234	-0.473512413	-0.590841617	0.662635832	-0.246319279	-0.29498089	-0.632297926	2.459513249	1
GPM6A	-0.529734162	-0.6795003	-0.925826797	-0.186402436	2.306598008	-0.33323781	-0.444885543	-0.062841505	0.855830545	1
GPN1	-0.26773065	0.806085693	0.067218546	-1.238527422	0.833422948	0.916197685	-1.156697545	-1.177339044	1.217369789	1
GPN3	-0.23732136	-1.231564858	0.374602939	0.059471945	0.966438479	-0.896455053	-0.239029517	-0.76986862	1.973726045	1
GPNMB	-0.539715	0.000789442	-0.530031858	-0.546365193	2.363015662	-0.468013263	-0.560741993	-0.556767043	0.837829247	1
GPR27	-0.496127877	-0.546521174	-0.546521174	-0.483805152	2.003220141	-0.471128425	-0.515927049	-0.436726975	1.493537686	1
GPR85	-0.756383976	-0.774576385	-0.106396267	-0.774523226	2.034339077	-0.756661828	1.120025858	-0.347225961	0.361402708	1
GPRC5B	-0.383406483	-0.460252156	-0.459686245	-0.406467979	2.524267082	-0.464233595	-0.464233595	-0.420062858	0.53407583	1
GPX7	-0.585724642	-0.408496029	0.040510426	-0.524765633	2.481273986	-0.525767795	-0.439742918	-0.559853546	0.522566151	1
GRAMD1A	-1.227245442	0.893122691	-0.628448744	-0.867712981	1.751698998	0.488904133	0.240422679	-1.022261979	0.371520646	1
GRIA1	-0.503371054	-0.503371054	-0.503371054	-0.503371054	1.85785551	-0.503371054	-0.503371054	-0.503371054	1.66574187	1
GRM4	-0.562533001	-0.571778182	-0.487558209	-0.272579085	2.393053051	-0.563658293	-0.461519456	-0.306169527	0.832742701	1
GRPEL1	0.073495356	1.208936353	-1.254506801	-0.254016934	0.937749282	0.303952361	-1.78906298	-0.073239218	0.84669258	1
GRPR	-0.473207077	-0.313126134	-0.473207077	-0.473207077	2.467724685	-0.473207077	-0.473207077	-0.473207077	0.684643908	1
GSTM4	-0.290420438	-0.856990267	-0.629939168	-0.214712956	2.191040456	-0.778392329	-0.452034334	-0.029925166	1.061374201	1
GSTO2	-0.62449594	-0.320741721	-0.548612849	-0.62131432	1.558669884	-0.204705084	-0.503914405	-0.650910558	1.916024991	1
GTF2IRD2P1	-0.902413857	0.579965518	-0.661535195	-0.941883713	1.634954761	0.652475282	-0.606409736	-0.884553849	1.129400789	1
GTF3C6	-0.232692271	-0.6388132	0.466375334	-1.284107124	0.615547764	-0.692746702	1.128477685	-0.972450279	1.610408791	1
GUCA1A	-0.510089752	-0.497003919	-0.502616843	-0.496996042	1.55053968	-0.498284506	-0.494121321	-0.510089752	1.958662454	1
GUCY1B3	-0.439627648	-0.484393619	-0.484393619	-0.428680982	2.36514315	-0.484393619	-0.484393619	-0.484393619	0.925133576	1
GUCY2C	-0.762600427	0.611264319	-0.934405146	-0.002571017	1.870685899	0.270918085	-0.99559111	-0.924938539	0.867237933	1
HACL1	-0.252454512	-0.551071521	1.23094704	-0.73770479	1.398709766	-0.542214944	-0.96829758	-0.860423749	1.282510289	1
HAGHL	-0.798455197	-0.718535048	-0.191315394	-0.756730296	1.921969922	-0.568494775	0.753325727	-0.711981185	1.070216246	1
HARBI1	-0.297170075	0.716913739	-0.270482194	-0.879442975	0.543595128	-0.221754695	-0.633353032	-1.101307981	2.143002085	1
HCLS1	-0.609586525	-0.531859701	-0.301527815	-0.6001163	1.599983185	-0.566639602	-0.282040405	-0.599004099	1.890791263	1
HCP5	-0.484970435	-0.484970435	-0.484970435	-0.484970435	2.241140873	-0.484970435	-0.484970435	-0.484970435	1.15365217	1
HDAC2-AS2	-0.407434932	-0.500281628	-0.490483463	-0.456173998	1.9625687	-0.581923388	-0.490846242	-0.57568302	1.540257972	1
HDAC7	-0.752617769	0.292635077	-0.677369937	-0.947103179	1.767051693	-0.375133357	0.66967198	-1.056316768	1.079182259	1
HDGFL3	-0.586764888	-0.334965449	-0.646876575	-0.100428005	2.313659425	-0.535543016	-0.667892628	-0.381248753	0.940059889	1
HEATR6	-1.218988269	1.00380714	-0.134355354	-0.697437879	0.754265532	-0.279512301	-0.611944548	-0.688410023	1.872575702	1
HELB	0.062966824	-1.341102384	-0.473065389	-0.934482263	0.400330257	-0.166615368	0.406218795	-0.129263973	2.175013502	1
HENMT1	-0.723324499	-0.617285028	0.117191684	-0.649391384	1.725744281	-0.571565771	-0.229312213	-0.720506466	1.668449396	1
HESX1	-0.481816201	-0.464348269	-0.365763794	-0.333984139	2.599303542	-0.389744509	-0.301220335	-0.500982074	0.238555779	1
HEY2	-0.45015738	-0.446507066	-0.45015738	-0.442852358	2.481403352	-0.45015738	-0.45015738	-0.45015738	0.658742971	1
HFE2	-0.547927388	-0.547927388	-0.547927388	-0.547927388	0.455951781	-0.241198034	-0.298987904	-0.250134795	2.526078504	1
HHLA1	-0.431242313	-0.431242313	-0.431242313	-0.431242313	2.600959154	-0.431242313	-0.250782028	-0.431242313	0.237276755	1
HIST1H2BF	-0.016869024	0.341646554	-0.81599633	-0.833844717	2.112958958	0.712695162	-1.168637593	-0.419458132	0.087505122	1
HIST1H2BL	0.436036494	-0.839751191	-0.734141412	-0.310654374	2.246019071	-0.850099256	-0.661613971	0.289379475	0.424825164	1
HIST1H2BN	-0.749179954	0.538581551	-0.807975253	-0.696156718	2.229112474	0.512111072	-0.351003925	-0.800699447	0.1252102	1
HIVEP2	-1.143134669	0.434359131	-0.653345177	-1.041747771	1.604405729	0.040528077	0.846318603	-0.964735802	0.877351879	1
HK2	-0.397239329	0.090280676	-0.95655993	-0.554680427	1.959847889	0.051795715	-0.838420211	-0.641032111	1.286007728	1
HKR1	-0.587930331	-0.183155852	-0.623059327	-0.547665939	1.644552278	-0.314540333	-0.635145696	-0.590676674	1.837621873	1
HLA-DOA	-0.680488831	-0.040264492	1.513183573	-0.680488831	1.839918378	0.089606698	-0.680488831	-0.680488831	-0.680488831	1
HLA-DPA3	-0.637519966	-0.637519966	0.047618516	-0.637519966	0.936851823	-0.637519966	-0.051906714	-0.637519966	2.255036207	1
HLA-DPB2	-0.445319268	-0.445319268	-0.445319268	-0.445319268	2.49490228	-0.445319268	-0.445319268	-0.445319268	0.622332596	1
HLA-DRB1	-1.158376048	-0.101417425	-0.919014911	0.383129205	-0.527553724	0.924782321	-0.571899155	-0.076606672	2.04695641	1
HLA-F	-0.565223395	-0.558955021	-0.427029827	-0.387540989	2.188366175	-0.563291122	-0.397781518	-0.515475677	1.226931373	1
HLA-L	-0.406916983	-0.500122898	-0.353877199	-0.314018691	2.625083004	-0.484122212	-0.318767971	-0.350391295	0.103134246	1
HLTF	-0.459525891	-0.849337771	-0.471124086	-0.329346734	1.206793804	-0.79304133	-0.242409005	-0.196144312	2.134135323	1
HMGB3	-0.632618213	-0.782461667	-0.099549564	-0.507274972	1.936444083	-0.734547811	-0.221868611	-0.437955381	1.479832137	1
HMGN5	-0.495953292	-0.729192524	-0.686119272	-0.206700293	1.174221472	-0.715234679	-0.522454812	0.050000036	2.131433363	1
HNF4A	-0.434667366	-0.674554598	-0.930919558	-0.273613449	1.370088411	-0.493939184	-0.994960348	0.801065228	1.631500863	1
HNRNPH2	-0.236544289	0.187631771	-1.079575885	0.754865191	1.03714673	0.126950925	-2.065275989	0.593689832	0.681111714	1
HOXA3	-0.539599252	-0.199595441	-0.664081344	-0.354237687	2.180357369	-0.477845321	-0.664081344	-0.483271429	1.202354449	1
HOXB3	-0.413534611	-0.410065352	-0.13126247	-0.533779001	2.428412539	-0.674005619	-0.339254252	-0.630121756	0.703610522	1
HOXB-AS1	-0.127395424	-0.07183394	-0.163016109	-0.505579388	2.421310692	-0.758996506	-0.714177322	-0.65020932	0.569897316	1
HPN	-1.024531113	1.069674302	-0.434121546	-1.010688281	0.661095761	0.798584402	-0.636954366	-0.925871929	1.50281277	1
HS3ST5	-0.094624101	-0.712231888	-0.449589814	0.106408271	2.169443742	-0.916738052	-0.118160225	-0.916738052	0.93223012	1
HSD17B6	-0.464851639	-0.654725247	-0.205818116	-0.38169998	1.03944318	-0.630647771	-0.482527968	-0.500723623	2.281551163	1
HSPA1L	-0.475203987	-0.313815119	-0.469725421	-0.47149319	2.554298146	-0.346900614	-0.43826681	-0.463935119	0.425042114	1
HSPA9	-0.430328149	-0.117115272	-0.89094741	-0.326544282	2.246698254	-0.066852678	-1.019343645	-0.257618079	0.862051261	1
HTR2C	-0.51239893	-0.550836776	-0.563564557	-0.499887346	1.240257566	-0.395158469	-0.426887307	-0.474383028	2.182858846	1
HTR3A	-0.476393334	-0.476393334	-0.476393334	-0.476393334	2.319701674	-0.476393334	-0.476393334	-0.476393334	1.015051665	1
HUS1	-0.298720544	-0.378381766	-0.800729894	-0.175978569	2.167414208	-0.333035143	-0.946152799	-0.35835374	1.123938246	1
HYAL1	-0.711895236	1.770614271	-0.556189166	-0.704508931	1.257361335	-0.072066316	-0.854049967	-0.848387989	0.719121998	1
HYAL4	-0.658701474	-0.63094137	-0.159363257	-0.69310575	1.87750679	-0.634830331	0.257164489	-0.788324395	1.430595298	1
HYOU1	-0.64644449	0.022074425	-0.544937958	-0.885093763	1.446255992	-0.260414077	-0.311684134	-0.741825265	1.922069271	1
IBTK	-0.265328499	0.702396659	-0.578152382	-1.039765969	1.021337681	0.139528932	-0.431783771	-1.302151534	1.753918883	1
ICAM3	-0.419787922	-0.419787922	-0.419787922	-0.291392197	2.611163662	-0.419787922	-0.419787922	-0.419787922	0.198956069	1
IDH1	-0.75697426	-0.94739567	1.145539797	-0.676897065	1.122678964	-0.894006824	1.03149331	-0.916389197	0.891950944	1
IFI16	-0.509601764	-0.463935526	-0.514384187	-0.505473994	1.375474176	-0.455315767	-0.512226456	-0.508519549	2.093983068	1
IFITM1	-0.560635783	-0.338997219	-0.470512473	-0.558910343	1.945674518	-0.516395894	-0.496897642	-0.560223861	1.556898698	1
IFITM2	-0.533406939	-0.451715092	-0.533517941	-0.537789499	1.884725658	-0.440400683	-0.493800807	-0.5278053	1.633710604	1
IGF2	-0.616183831	-0.562284998	0.048662754	-0.368099955	2.495885798	-0.551351479	-0.279431822	-0.603595148	0.436398681	1
IL11RA	-0.781679252	-0.145741863	-0.652200879	-0.45414624	2.571993059	-0.021622006	-0.119851053	-0.315499753	-0.081252014	1
IL17RB	-0.076747704	-1.001934472	-0.325496132	-0.289042314	1.481050314	-0.917242763	-0.436454963	-0.30090991	1.866777943	1
IL23A	-0.556588556	-0.475201533	-0.330603756	-0.6944089	1.957163407	-0.606462255	-0.320555358	-0.497818662	1.524475612	1
IL34	-0.64795939	-0.654663971	-0.426392135	-0.665691271	1.743663255	-0.559577535	0.190138112	-0.633496882	1.653979815	1
ING4	-1.047377658	0.88142569	-0.211238416	-1.186861678	1.498305778	0.972002528	0.033220312	-1.19109314	0.251616585	1
INO80D	0.0047251	-0.74518844	-0.894410078	-0.54918811	0.529082362	-0.866942474	1.176466452	-0.556576957	1.902032144	1
INPP5D	-0.542978706	-0.521859107	-0.512762509	-0.505811288	1.923115547	-0.52812205	-0.46871297	-0.433267553	1.590398635	1
INPP5J	-0.535644958	-0.306697984	-0.595280398	0.465205662	1.103125785	-0.764190212	-0.83258065	-0.585966737	2.052029491	1
INTS6L	-0.511704722	-0.511704722	-0.511704722	-0.511704722	1.719798261	-0.511704722	-0.511704722	-0.456026078	1.80645615	1
IPMK	-0.657620595	-0.954089684	-0.476989143	-0.378719018	1.682580017	-0.893773637	0.812333065	-0.46721871	1.333497706	1
IQCC	-0.335994384	0.572157738	0.191008442	-1.063986219	1.215764962	0.376126373	-1.343628902	-1.007974385	1.396526375	1
IQCK	-0.334562443	-0.583640473	-0.612465955	-0.269242614	1.290496852	-0.468064255	-0.650892692	-0.502230001	2.130601581	1
IQGAP2	-0.154673736	-0.479636277	-0.486534734	-0.433360447	2.522268489	-0.490882832	-0.49571917	-0.476937459	0.495476166	1
IRAK1BP1	0.11908613	-0.843912478	-0.833989166	0.162070141	1.486581015	-0.896932017	-0.70926167	-0.212566163	1.728924207	1
ISLR	-0.440124464	-0.423542755	-0.440124464	-0.440124464	2.562670389	-0.380288406	-0.407749435	-0.440124464	0.409408065	1
ITGA11	-0.2750371	-0.391112398	-0.472925119	-0.479808209	2.459524133	-0.560654914	-0.405900309	-0.562037637	0.687951553	1
ITLN2	-0.515590388	-0.502669022	-0.515590388	-0.511280673	1.779133743	-0.489686223	-0.481952553	-0.510560502	1.748196005	1
IZUMO2	-0.522140989	-0.522140989	-0.445715923	-0.455186632	1.936486839	-0.522140989	-0.522140989	-0.522140989	1.575120663	1
JAG1	-0.339664308	-0.640220835	-0.643416454	-0.330595377	2.216290506	-0.637008079	-0.401554434	-0.377186507	1.153355487	1
JAK1	-0.883542044	-0.551355146	-0.229026997	-0.789243949	1.706837812	-0.415137154	1.542238952	-0.783417341	0.402645868	1
JMY	-1.162540813	0.046646903	-0.57510726	-0.745769709	1.687606559	0.043758715	0.06691739	-0.842900428	1.481388643	1
JPX	-0.477673632	0.156791051	-0.80996761	-0.959224392	1.511234371	0.767750032	0.228292588	-1.46531709	1.048114683	1
KAT7	-0.706572408	0.429971343	-0.202172544	-0.661603543	1.578439367	-0.055454662	-1.078320751	-0.864157627	1.559870824	1
KBTBD4	-0.577258478	0.441689097	0.082147147	-1.227802229	1.837100909	0.285672679	-0.690324497	-1.07883361	0.927608982	1
KCNA4	-0.546216427	-0.546216427	-0.546216427	-0.546216427	1.742403217	-0.23154303	-0.546216427	-0.546216427	1.766438378	1
KCNC4	-0.038234965	-0.656847243	-0.977858313	0.211735966	1.543752239	-0.808877397	-0.820889874	-0.136827673	1.684047259	1
KCND2	-0.489422034	-0.489422034	-0.489422034	-0.344097187	2.369399379	-0.489422034	-0.489422034	-0.489422034	0.911230015	1
KCNG3	-0.59117855	-0.59117855	-0.494357089	-0.251885757	1.74491301	-0.59117855	-0.59117855	-0.393183529	1.759227564	1
KCNH6	-0.438783083	-0.438783083	-0.438783083	-0.438783083	0.552052252	-0.438783083	-0.438783083	-0.438783083	2.519429331	1
KCNJ8	-0.39296812	-0.39296812	-0.39296812	-0.39296812	2.627515767	-0.39296812	-0.39296812	-0.39296812	0.123261074	1
KCNMB4	-0.166253563	-0.818606078	-0.687422394	0.01447295	2.372123162	-0.821877029	-0.397368668	-0.095136586	0.600068206	1
KCNQ5	-0.333333333	-0.333333333	-0.333333333	-0.333333333	2.666666667	-0.333333333	-0.333333333	-0.333333333	-0.333333333	1
KCP	-0.562575826	0.404218115	-0.639547577	-1.01707122	1.969049476	-0.309039663	-0.450029847	-0.62444902	1.229445563	1
KCTD14	1.795034801	0.672124459	0.090873518	-0.805170662	0.925675944	-0.730463444	-0.934373614	-1.174772382	0.16107138	1
KDM2B	-0.352100208	-0.863253068	-0.393686898	-0.347434305	1.808431265	-0.986764142	0.091693583	-0.49297296	1.536086733	1
KDM3A	-1.299664725	-0.015649051	0.185041857	-0.625291763	2.174582038	-0.468639924	-0.226601501	-0.512837073	0.789060143	1
KDM6A	-0.477039126	-0.898114931	-0.321153144	-0.850680744	1.530652093	-0.790995323	0.603431849	-0.418256186	1.622155513	1
KIAA0907	-1.171552791	0.505330108	-0.978337489	-1.298204219	0.874931403	1.065819003	-0.087885865	-0.238148802	1.328048651	1
KIAA1191	-0.541343601	0.452199831	-0.189499332	-0.076234457	2.001994175	0.063231952	-1.4501747	-0.939997389	0.679823521	1
KIAA1456	-0.553299403	0.035658453	-0.553299403	0.036012897	2.538145321	-0.553299403	-0.553299403	-0.553299403	0.156680343	1
KIAA1551	-0.379467009	-0.409098911	-0.659869622	-0.381212856	1.430393239	-0.469992669	-0.645162026	-0.523033555	2.037443409	1
KIF12	-0.656136668	-0.656136668	0.18330061	-0.656136668	2.471863126	-0.656136668	0.11953701	-0.308175776	0.158021704	1
KIF26A	-0.656413341	-0.941613294	-0.180260757	0.381380707	1.94125954	-1.169554842	0.343599624	-0.637171495	0.918773857	1
KIF6	-0.221549338	-0.90926933	-0.74667318	-0.40246648	1.456199193	-1.035874789	-0.294300758	0.442632193	1.711302488	1
KIF9	-0.417411024	-0.526904871	-0.622810175	-0.443759443	2.006626227	-0.44502012	-0.598260903	-0.433346911	1.480887221	1
KIZ	-0.943446494	-0.763735951	0.792738748	-0.279729797	1.492974425	-0.572252363	0.015984693	-1.142110279	1.399577017	1
KLC4	-0.806633655	-0.062780296	-0.355123695	-0.675615581	2.004109791	-0.270529886	-0.46699478	-0.74491286	1.378480962	1
KLF11	-0.83631704	-0.29736949	-0.64012757	-0.702576479	1.521494893	-0.30791563	-0.050061265	-0.575368503	1.888241084	1
KLF4	-0.975781028	-0.076047171	-0.557693995	-0.941300141	1.418293131	0.158689315	-0.211600432	-0.644383885	1.829824206	1
KLF7	-0.48883146	-0.501857282	-0.539027339	-0.412632654	2.042907475	-0.52983232	-0.543786688	-0.468730706	1.441790975	1
KLHDC2	-0.689837606	-0.377815353	-0.471328822	-0.868208352	1.240761921	-0.311125343	0.409793346	-0.885832436	1.953592645	1
KLHDC7A	-0.447288484	-0.447288484	-0.447288484	-0.447288484	2.486891777	-0.447288484	0.644127607	-0.447288484	-0.447288484	1
KLHDC8A	-0.609417629	-0.609417629	-0.107774563	-0.609417629	2.272381845	-0.609417629	-0.609417629	-0.096500179	0.978981041	1
KLHL18	-0.380021655	-0.316608018	-0.6673941	-0.561427898	1.630069615	-0.377416861	-0.627255725	-0.565833592	1.865888234	1
KLK10	-0.385902348	-0.231486562	-0.385902348	-0.385902348	2.653584155	-0.385902348	-0.385902348	-0.385902348	-0.106683505	1
KLK1	-0.515913923	-0.364161577	-0.515913923	-0.439992075	2.471146036	-0.424646071	-0.367769171	-0.515913923	0.673164627	1
KLK13	-0.502569617	-0.502569617	-0.502569617	-0.502569617	1.610924273	-0.502569617	-0.502569617	-0.502569617	1.907063043	1
KLK8	-0.454137308	-0.492650669	-0.555995178	-0.429229898	1.522103938	-0.555995178	-0.531259727	-0.482021033	1.979185052	1
KLRG2	-0.213898528	-0.683427129	-0.603940136	-0.431551894	1.754427941	-0.655411656	-0.548518527	-0.351033742	1.733353672	1
KMT5B	-0.990202446	-0.237780637	-0.028931356	-1.208593633	0.972957919	-0.29939084	1.291211297	-0.905608806	1.406338502	1
KNDC1	-0.543066465	-0.591026426	-0.45476542	-0.352275761	2.305264929	-0.591026426	-0.591026426	-0.173056064	0.990978059	1
KRBOX4	0.093226778	0.325981005	-1.003610083	-0.595162391	-0.032299732	1.113421015	-0.855338222	-0.954260973	1.908042603	1
KRTCAP3	-0.559549655	-0.918495179	0.062880105	-0.356737104	1.242827937	-0.923122735	-0.207240899	-0.373498467	2.032935996	1
KTI12	-0.44506915	-0.238006067	-0.725577858	-0.454906183	1.342303955	-0.607405315	-0.729215844	-0.207621127	2.065497591	1
LAGE3	-1.037818228	-0.672066481	-0.02749671	-1.138667232	1.825522999	0.412415686	0.477057997	-0.765277396	0.926329366	1
LAPTM4A	-0.882643381	0.134035466	-0.418539179	-0.492768328	1.970414363	-0.251955379	-0.483115933	-0.909193498	1.333765869	1
LARP7	-0.366435239	-0.910855379	-0.288261023	-0.360040943	1.636636891	-0.953429141	-0.141954825	-0.370230058	1.754569716	1
LBH	-0.496741235	-0.693065539	-0.670445863	0.048537172	1.776740379	-0.739685072	-0.734582484	-0.093493149	1.602735792	1
LCK	-0.279975163	-0.479638563	-0.337820622	-0.479638563	2.616238561	-0.479638563	-0.479638563	0.10038256	-0.180271083	1
LDB1	-1.358512855	0.217755185	-0.347535387	-1.117758395	1.946181675	0.341873143	0.709358402	-0.551060335	0.159698566	1
LDHD	-0.898110128	-0.129182914	-0.379644464	-0.140311545	1.946393586	-0.387724634	-0.644924138	-0.79174312	1.425247358	1
LEF1	-0.107363159	-0.519739022	-0.519739022	-0.519739022	0.153322671	-0.519739022	-0.019026454	-0.519739022	2.571762052	1
LEFTY1	-0.418236811	-0.575017077	-0.575017077	-0.379899179	1.472101631	-0.575017077	-0.384652279	-0.575017077	2.010754944	1
LEFTY2	-0.465172158	-0.465172158	-0.465172158	-0.465172158	0.656939343	-0.465172158	-0.34591854	-0.465172158	2.480012146	1
LGR6	-0.385111249	-0.509827575	-0.54771343	-0.598153732	1.604063799	-0.598153732	-0.42570095	-0.443431905	1.904028773	1
LHFPL4	-0.343276379	-0.604715811	-0.738925162	-0.02271107	2.43117191	-0.254622945	-0.38954167	-0.686681633	0.60930276	1
LHX6	0.291600156	-0.559861499	-0.45039146	-0.703804747	1.135779115	-0.770779256	-0.850320706	-0.158850999	2.066629396	1
LIAS	0.267229366	-0.303155987	-0.788637419	0.230173282	1.302987079	-0.718004367	-1.239003765	-0.523412114	1.771823926	1
LIG3	-0.188099689	-1.052211488	0.713184059	-0.722493223	1.573530813	-0.881929017	-0.459240464	-0.451769833	1.469028841	1
LIMCH1	-0.751367046	-0.21758958	-0.639665967	-0.331557547	2.313668755	-0.40817786	-0.495755946	-0.428631531	0.959076722	1
LINC00310	-0.977886962	-0.320275683	-0.673304485	-0.731549312	0.746750754	0.341680232	1.668849713	-1.143318383	1.089054126	1
LINC00337	-0.587924597	-0.899829201	-0.049215327	-0.660174834	1.301669106	-0.644553178	-0.079386272	-0.410754713	2.030169018	1
LINC00471	-0.831229409	1.559838221	0.094334015	-0.788563304	0.792846071	-0.32425091	-0.837680357	-1.006053643	1.340759317	1
LINC00545	-0.495962454	-0.495962454	-0.495962454	-0.495962454	1.381136876	-0.495962454	-0.495962454	-0.495962454	2.090600305	1
LINC00632	-0.543309483	-0.476446466	-0.430233189	-0.502548765	1.137453371	-0.489892758	-0.39910665	-0.54350908	2.247593021	1
LINC00664	0.026593763	-0.780046882	-0.612785888	-0.335924441	2.18974369	-0.772844251	-0.382270912	-0.421636309	1.08917123	1
LINC00678	-0.483765265	-0.483765265	-0.483765265	-0.483765265	2.25357641	-0.483765265	-0.483765265	-0.483765265	1.132780447	1
LINC00908	-0.357493806	-0.627930509	-0.243756169	-0.627930509	1.137648997	-0.627930509	-0.627930509	-0.235121889	2.210444903	1
LINC01108	-0.41623977	-0.41623977	-0.41623977	-0.41623977	2.584325403	-0.41623977	-0.41623977	-0.41623977	0.329352987	1
LINC01184	-1.058425595	0.776481591	0.060103777	-0.535466791	2.158246053	0.090177012	0.055428459	-0.526955118	-1.019589389	1
LINC01356	-0.682996996	-0.679335249	0.821348883	-0.654324453	1.536114005	-0.706442506	-0.398181716	-0.771412128	1.53523016	1
LINC01405	-0.024617882	-0.690162646	-0.690162646	-0.072709272	1.521883869	-0.690162646	-0.690162646	-0.531975042	1.86806891	1
LINC01836	-0.288352272	-0.491389501	-0.436384966	-0.607208815	1.760735109	-0.676701825	-0.44033251	-0.5652756	1.74491038	1
LINC01950	-0.437627472	-0.437627472	-0.437627472	-0.437627472	2.523459522	-0.437627472	-0.437627472	-0.437627472	0.539932782	1
LINC02523	-0.377118333	-0.377118333	-0.377118333	-0.377118333	2.646587737	-0.377118333	-0.377118333	-0.377118333	-0.006759408	1
LINC-ROR	-0.258887019	-0.400975629	-0.400975629	-0.400975629	2.639632236	-0.400975629	-0.400975629	-0.400975629	0.02510856	1
LINGO1	-0.06511896	-0.918388481	-0.956111193	0.067002433	1.671820091	-0.967089985	-0.354919061	-0.018983037	1.541788192	1
LIX1L	-0.365729375	-1.170753035	0.085324133	-0.34954244	1.694032411	-1.151009014	1.26491245	-0.538183739	0.53094861	1
LMF1	0.110432766	-0.986958296	-0.827083911	-0.769929422	2.034561528	-0.399859514	-0.248661488	-0.082498276	1.169996612	1
LMLN	-0.784420431	-0.742445275	-0.271306089	-0.193313613	1.661019471	-0.604937376	-0.385149719	-0.474905646	1.795458678	1
LNCPRESS1	-0.502094975	-0.505108069	-0.498687601	-0.50135818	1.557925663	-0.502854144	-0.499620257	-0.500731558	1.952529121	1
LNCPRESS2	-0.488940054	-0.488940054	-0.488940054	-0.488940054	2.195818384	-0.488940054	-0.488940054	-0.488940054	1.226761993	1
LPAR1	-0.448914215	-0.465956069	-0.459903782	-0.46065379	2.440707611	-0.465956069	-0.440090496	-0.459767757	0.760534569	1
LPAR2	-0.157303025	-0.90388204	-0.471414756	-0.191620769	2.229621407	-0.89464991	-0.220847379	-0.363087277	0.973183749	1
LRIG2	-0.631587281	0.544352387	-0.854176963	-0.285635351	0.580446432	-0.107353552	-0.721358979	-0.768413704	2.243727012	1
LRP4	0.078202287	-0.92660304	-0.719191484	0.551297159	1.980343622	-0.870838525	-0.774724327	-0.292321437	0.973835745	1
LRRC2	-0.511020519	-0.511020519	-0.511020519	-0.511020519	1.801112398	-0.511020519	-0.460430194	-0.511020519	1.725440912	1
LRRC27	-0.741302433	-0.474993424	-1.000992636	0.262037481	1.803298579	-0.57102686	-0.288759862	-0.489382726	1.501121881	1
LRRC2-AS1	-0.634762365	-0.634762365	-0.634762365	-0.634762365	1.941139075	-0.634762365	1.121843278	-0.634762365	0.745591839	1
LRRC41	-1.208938085	0.10607217	0.250918712	-1.133798468	1.271036428	-0.123672263	0.747296997	-1.176204202	1.267288712	1
LRRC45	-0.449928646	-0.81672095	-0.159182008	-0.323563322	1.816666278	-0.889381969	1.52224798	-0.766534311	0.066396948	1
LRRC49	0.223068732	-0.640539	-0.733488099	0.010552312	2.291433615	-0.711127283	-0.733488099	-0.429557659	0.723145482	1
LRRC4C	-0.621280811	-0.621280811	0.412499384	-0.621280811	1.754230682	-0.621280811	-0.621280811	-0.621280811	1.560954802	1
LRRC6	-0.170897252	-0.739370168	-0.739370168	-0.562499623	2.392077852	-0.739370168	0.03715859	-0.016877919	0.539148857	1
LRRTM4	-0.475101799	-0.48000706	-0.522198875	-0.389071895	2.223362961	-0.548136663	-0.43728672	-0.548136663	1.176576714	1
LSAMP	-0.491558533	-0.491558533	-0.491558533	-0.491558533	1.279625217	-0.491558533	-0.491558533	-0.491558533	2.161284517	1
LSM12P1	-0.524964523	0.221089509	0.288995187	-0.621281734	0.716788494	-0.134842043	-0.943272246	-1.127110145	2.1245975	1
LUM	0.382995716	-0.605638619	-0.58418977	-0.257794426	2.448449329	-0.582691889	-0.603609109	-0.523316421	0.325795188	1
LY75	-0.534333767	-0.565682087	-0.521149595	-0.565682087	1.58326238	-0.471882471	-0.375364249	-0.474615387	1.925447263	1
LYST	-0.211584002	-0.554840358	-0.469754061	-0.370754177	2.527456747	-0.692711275	-0.29286449	-0.375815266	0.440866882	1
LYZ	-0.67511994	0.183553199	-0.748595084	-0.730306665	2.081585223	0.658447426	-0.748595084	-0.748595084	0.72762601	1
LZTS3	-1.03651845	-0.123392449	-0.268038643	-0.823417319	1.412765998	0.525392669	-0.038626396	-1.207052698	1.558887287	1
MAD2L1BP	0.190141125	0.580029523	-0.877315001	-0.564400127	1.520061267	-0.287618632	-1.17136847	-0.832181029	1.442651344	1
MAD2L2	-0.14331809	-0.256466785	-0.73814663	-0.070524384	2.582469344	-0.485812809	-0.490393827	-0.462605271	0.064798452	1
MAGEH1	-0.50680787	-0.526122525	-0.498684701	-0.5100974	1.554496408	-0.526122525	-0.4714009	-0.470013553	1.954753064	1
MAN1C1	-0.866928203	0.042466467	-0.686310348	-0.834715225	1.429942382	-0.181331671	-0.040288214	-0.726224385	1.863389197	1
MAP1A	-0.338518801	-0.569037566	-0.328871108	-0.314012968	2.454407954	-0.536016129	-0.515231242	-0.545674334	0.692954194	1
MAP1B	-0.405920349	-0.312782499	-0.498660466	-0.450978487	2.57602262	-0.275019986	-0.48669491	-0.476900299	0.330934376	1
MAP2	-0.507824869	-0.507824869	-0.507824869	-0.378497036	2.375521734	-0.352356137	-0.507824869	-0.507824869	0.894455784	1
MAP2K5	-0.539486052	-1.460616999	-0.53767132	-0.500803647	1.822199602	0.223620175	1.259602	-0.280119995	0.013276238	1
MAP2K6	-0.403656471	-1.051119744	1.575102941	-0.673371822	1.097675964	-0.991097518	-0.161853769	-0.532332328	1.140652747	1
MAP4K1	-0.481133723	-0.48287669	-0.46188455	-0.399554738	2.395064758	-0.493415479	-0.483206592	-0.454618488	0.861625502	1
MAPK13	-0.683811978	0.001689882	-0.709630863	-0.324290958	2.338070864	-0.43026432	-0.461245091	-0.580415239	0.849897703	1
MAPKAPK5-AS1	-0.700366842	0.291807637	-0.563848341	-0.448604986	0.03401663	0.293889869	-0.838562078	-0.491694266	2.423362377	1
MARCKSL1	-0.510113029	-0.937950351	-0.629173576	0.124025171	2.075163586	-0.92988591	-0.355629264	0.094755784	1.068807588	1
MATK	-0.46846165	-0.009485744	-0.52801882	-0.52801882	2.485385389	-0.438916125	-0.52801882	-0.52801882	0.543553409	1
MB	-0.297274652	-0.488026841	-0.433831465	-0.440547438	0.352583921	-0.316797739	-0.488026841	-0.460320135	2.572241191	1
MBNL1	0.239798721	-0.699441582	-0.694048276	-0.441163385	2.474484736	-0.524232684	-0.272414839	-0.429693858	0.346711166	1
MBOAT1	0.284248615	-0.776490342	-0.644138828	-0.152748506	1.262205522	-0.834218175	-0.540832954	-0.586193505	1.988168173	1
MBTD1	-1.113788366	-0.356834483	-1.061517736	0.043857903	1.926153604	-0.664788539	0.967470226	-0.307159922	0.566607312	1
MCHR1	-0.352390053	-0.379834068	-0.399270372	-0.399270372	2.635863924	-0.375891363	-0.399270372	-0.399270372	0.069333047	1
MCOLN3	-0.312105815	-0.509777595	-0.671399568	0.367882802	2.485303277	-0.53225748	-0.700433616	-0.284821426	0.157609421	1
MCRIP2	-0.559172813	-0.128134542	-1.089576383	-0.477770326	2.338142429	-0.14014591	-0.695682521	0.407260827	0.345079239	1
MDK	-0.37857601	-0.733282041	-0.554918418	0.132288921	2.039068646	-0.768176505	-0.638994144	-0.394281742	1.296871293	1
MEAF6	-0.302566741	0.067942511	-0.692820602	-0.265810429	1.52415602	-0.429151751	-1.231815304	-0.44041963	1.770485927	1
MECP2	-0.38311914	0.649409307	-0.828990167	-1.074292018	1.535723925	0.324400461	0.388752802	-1.486651087	0.874765918	1
MED29	-0.495316225	1.209438263	-0.655610314	-0.54760295	1.719602294	0.37733873	-0.933964885	-1.162611773	0.488726858	1
MEDAG	-0.48725858	-0.48725858	-0.48725858	-0.48725858	2.257263076	-0.48725858	-0.460035392	-0.48725858	1.126323799	1
MEF2C	-0.618888411	-0.697786752	-0.585706109	-0.599595305	2.135250149	-0.638767365	0.691305674	-0.525887287	0.840075407	1
MEIS1	0.060582505	-0.856717356	-0.161287815	-0.027643901	2.251320789	-1.034319251	-0.661045933	-0.318490362	0.747601325	1
MEIS2	-0.501811797	-0.441785929	-0.505213913	-0.318467678	2.522700251	-0.559595573	-0.116469997	-0.54091101	0.461555644	1
MEIS3	-0.218280384	-0.583312227	-0.671533374	-0.085205744	1.980563815	-0.69064485	-0.762483879	-0.390505455	1.421402096	1
MEPCE	-0.680534835	-0.328813067	-0.438914263	-0.862505278	1.45064411	-0.835409466	0.938321584	-0.744511508	1.501722721	1
MEST	-0.753534994	-0.885149419	-0.466039229	-0.179778364	1.291157321	-0.825612737	-0.708365894	0.842356978	1.684966338	1
MFGE8	-0.180399224	-0.841695775	-0.571029681	-0.198533229	2.464450369	-0.734189897	-0.40897349	0.274427389	0.195943539	1
MGC32805	-0.455264843	-0.455264843	-0.455264843	-0.432990514	2.465930214	-0.455264843	-0.455264843	-0.455264843	0.69864936	1
MICA	-0.478619654	-0.579652219	-0.555731577	-0.314204989	2.159534964	-0.546062555	-0.572836933	-0.37583342	1.263406382	1
MICB	-0.069126939	-1.087382964	-0.102105593	0.118116328	1.661590786	-1.022594964	-0.419865294	-0.630441563	1.551810203	1
MID1IP1	-0.401137286	-0.72734189	-0.632337418	-0.400189423	1.813743123	-0.476936511	-0.755833682	-0.050635311	1.630668398	1
MIDN	-1.683073168	0.185147146	0.190790429	-1.190371232	0.80611049	0.076736546	0.961851893	-0.644590345	1.297398239	1
MILR1	-0.983894258	0.368719541	0.869428613	-1.04713573	0.535570105	0.056702836	-0.61199986	-1.016516372	1.829125126	1
MINDY1	-1.260422758	-0.720243498	-0.36411242	-0.369819814	1.250102918	1.011620468	-0.537539511	-0.567265437	1.557680053	1
MIR302A	-0.570919717	-0.570919717	-0.467641198	-0.480439627	1.802305419	-0.570919717	-0.394367761	-0.465320025	1.718222344	1
MIR302B	-0.506702168	-0.506702168	-0.506702168	-0.506702168	0.575421653	-0.010747355	-0.506702168	-0.506702168	2.475538708	1
MIR302C	-0.235059261	-0.56775575	-0.473232005	-0.56775575	2.038704499	-0.56775575	-0.486962802	-0.56775575	1.42757257	1
MIR302D	-0.42111244	-0.606177074	-0.430912201	-0.529404181	1.508203319	-0.606177074	-0.381469001	-0.516575108	1.983623759	1
MIR367	-0.516666391	-0.516666391	-0.516666391	-0.516666391	1.343981659	-0.516666391	-0.356951381	-0.516666391	2.112968068	1
MIR99AHG	0.260017699	-0.652411	-0.635989893	-0.486081483	0.626773001	-0.542157115	-0.590303356	-0.366558989	2.386711137	1
MIS12	-0.626537404	1.214637923	-0.132156828	-1.03608682	1.024115272	0.700319245	-1.497872873	-0.596440161	0.950021645	1
MLXIP	-0.536037777	-0.120066665	-1.031473172	-0.590759745	1.586152137	0.143187684	-0.740503691	-0.443638052	1.73313928	1
MMP11	-0.638431273	-0.657832222	-0.43228798	-0.570480427	1.891371722	-0.608203596	1.548672525	-0.54908236	0.016273611	1
MMP24	-0.478728823	-0.49906917	-0.537643917	-0.484813652	2.113999405	-0.484662358	-0.473024465	-0.503739132	1.347682112	1
MMP9	-0.423265968	-0.485397919	-0.441266519	-0.475732276	2.430111783	-0.485397919	-0.428816805	-0.474117107	0.783882732	1
MN1	-0.507181804	-0.513773698	-0.517884711	-0.373908902	2.113103715	-0.507709092	-0.491153403	-0.546202513	1.344710408	1
MND1	-0.16273514	-0.882967345	-0.513047906	0.193189414	1.052839186	-0.884180592	-0.765257954	-0.135262887	2.097423224	1
MOGAT3	-0.496162577	-0.487755026	-0.491361288	-0.496162577	1.293913555	-0.496162577	-0.481799138	-0.496162577	2.151652205	1
MPC1	-0.243319631	-0.5616812	-0.861039541	-0.16761794	2.049411138	-0.479693637	-0.695208562	-0.381335943	1.340485315	1
MPP2	-0.39363697	-0.623673338	-0.576840037	-0.275379395	2.003929712	-0.631675168	-0.608240359	-0.356009739	1.461525295	1
MPP6	0.016643507	-0.817789686	-0.596544915	-0.379065664	1.990532173	-0.806069395	-0.524385822	-0.254357099	1.371036902	1
MPPE1	-1.071703762	0.423838178	0.212426936	-1.085035415	0.360760866	0.395012296	0.509571134	-1.433042968	1.688172735	1
MPV17L	-0.437498069	-0.540732542	-0.556541102	-0.369814309	1.360139853	-0.566795314	-0.571348758	-0.414983396	2.097573637	1
MRC2	-0.44247728	-0.456732513	-0.383280243	-0.430752492	2.552025527	-0.461452795	-0.36468338	-0.455940418	0.443293593	1
MRPL12	0.513560219	-1.057897805	-0.782401187	-0.483542252	1.614555487	-0.89430601	-0.347005137	-0.059819939	1.496856625	1
MRPL2	-0.575509418	0.137639103	-0.547427785	-0.559344765	1.368281642	-0.120894447	-1.125909477	-0.486357085	1.909522233	1
MRPL34	-0.570057366	0.300429511	-0.847124001	-0.359864987	1.912396201	0.176905154	-1.344981688	-0.330986566	1.063283742	1
MSH6	-0.218644865	-0.783492246	-0.587825902	-0.307562324	1.54650623	-0.806125218	-0.404492191	-0.331322206	1.892958723	1
MSRB3	0.636633582	-0.941560809	-0.070119336	-0.816829503	1.713053357	-1.066142121	0.879772352	-0.920655216	0.585847695	1
MSX1	-0.389266915	-0.619853177	-0.619853177	-0.619853177	1.638263241	-0.619853177	-0.619853177	0.049998705	1.800270854	1
MT1B	-0.469317446	-0.15184254	-0.431807319	-0.450476492	2.59770896	-0.382739202	-0.453223121	-0.471164457	0.212861618	1
MT1E	-0.7974812	1.544593025	-0.385446559	-0.792552921	1.768623321	0.202402716	-0.4141491	-0.899971065	-0.226018217	1
MT1G	-0.805961798	0.125502982	-0.716430741	-0.809500377	1.964752698	1.075665572	-0.515005981	-0.804756223	0.485733868	1
MT1H	-0.778258059	-0.017715307	-0.672987918	-0.77943117	2.226535516	0.618640662	-0.341501794	-0.777329465	0.522047536	1
MT1HL1	-0.744573742	-0.160127529	-0.684668295	-0.737076332	2.185533258	0.508213043	-0.422723763	-0.744573742	0.799997103	1
MT1M	-0.456090178	-0.445165424	-0.256449072	-0.456090178	2.62185564	-0.452147917	-0.169200582	-0.456090178	0.069377889	1
MT1X	-0.768823496	0.340077865	-0.70644367	-0.782903194	2.123240294	0.542348431	-0.60462027	-0.77967304	0.636797081	1
MT1XP1	-0.794963825	0.267882622	-0.755350523	-0.789050828	1.983019753	1.046545682	-0.546508167	-0.794057084	0.38248237	1
MTHFD2	-0.673332638	-0.61700126	-0.385770808	0.117219651	1.456326225	-0.618757288	-1.068535004	-0.042111207	1.83196233	1
MTHFSD	-0.999475984	1.446947585	-0.939943419	-0.097770853	0.671076397	-0.303742396	-0.013117973	-1.194181086	1.430207731	1
MTMR14	0.341394652	-0.821213509	-0.914351702	0.139968386	2.305208837	-0.666384116	0.354312027	-0.683173474	-0.055761099	1
MTSS1	-0.185019971	-0.864850591	-0.553476142	-0.687052663	1.92933808	-0.791086709	-0.619635986	1.148286979	0.623497003	1
MXRA5	-0.499640604	-0.499640604	-0.499640604	-0.499640604	2.009813845	-0.499640604	-0.499640604	-0.499640604	1.487670385	1
MYBL2	0.153057989	-0.891855049	-0.613683551	-0.341723557	1.515739284	-0.890581473	-0.340627284	-0.410413725	1.820087367	1
MYMX	-0.784319688	-0.737908421	0.355353186	-0.784319688	1.712714854	-0.700580817	0.325724765	-0.784319688	1.397655496	1
MYO15B	-1.134842076	0.124577434	-0.255801485	-0.924812477	1.711433065	0.043410416	1.187508051	-1.134842076	0.383369148	1
MYO5A	-0.322844865	-0.584140949	-0.63467304	-0.26714263	2.253470289	-0.534370445	-0.62169261	-0.378180517	1.089574766	1
MYO5C	-1.128171272	0.991613126	-1.155481741	-0.112137013	1.650887771	0.024315797	-0.636223925	-0.591589054	0.956786311	1
MYOZ1	-0.703816344	-0.697122891	-0.653264735	0.020482232	1.106084074	-0.566962703	-0.364551847	-0.33246543	2.191617644	1
MYOZ3	-0.508336002	-0.451391735	-0.55673252	-0.48144381	2.405417407	-0.538631172	-0.29229573	-0.398566934	0.821980496	1
MYSM1	-0.340215378	-0.610113952	-0.652566919	-0.388426385	1.808129078	-0.655151174	-0.502664034	-0.350504583	1.691513347	1
N4BP2	-0.676450895	-0.602597024	-0.34008404	-0.579314166	1.4348892	-0.679945339	0.196779957	-0.67873632	1.925458629	1
NAALAD2	-0.488755512	-0.548888765	-0.296217087	-0.184476796	-0.140633653	-0.50065084	-0.328984586	-0.145448155	2.634055393	1
NADK	-0.588531381	-0.185682745	-0.699035167	-0.688655089	2.200486752	-0.145119832	-0.425320142	-0.591602989	1.123460594	1
NANOG	-0.435344282	-0.437191593	-0.437191593	-0.437191593	2.527254324	-0.436638846	-0.435397168	-0.43665495	0.528355701	1
NANOGP1	-0.49434754	-0.49924989	-0.48880369	-0.49924989	1.317068057	-0.488248377	-0.487344885	-0.495689565	2.13586578	1
NAPEPLD	-0.335910152	-0.957653145	-0.744893106	0.361481143	1.843276607	-1.02618386	0.191483719	-0.552864302	1.221263096	1
NBPF11	-1.034086145	-0.298218448	-0.581401643	-1.178170422	1.055502007	0.116252772	0.768367071	-0.593387637	1.745142445	1
NBPF9	-0.368196735	-1.017865664	-0.442360483	-0.628746009	0.547572532	-0.783092015	0.177255452	0.225925144	2.289507778	1
NCAM1	-0.461001682	-0.467967984	-0.467422133	-0.467965672	2.435952898	-0.460259987	-0.417447654	-0.465081188	0.771193401	1
NCKAP5	-0.247045861	-0.714931136	-0.714931136	-0.714931136	1.576054316	-0.714931136	1.557520493	-0.714931136	0.688126733	1
NCR1	-0.474866085	-0.544478619	-0.541202276	-0.429142676	1.912816394	-0.567529157	-0.522524036	-0.432936288	1.599862743	1
NDN	-0.292226147	-0.763318855	-0.179864576	-0.118399648	2.432988448	-0.816742229	-0.365826557	-0.477410139	0.580799704	1
NDRG2	0.838146493	0.648947373	-1.424552215	-0.016878314	0.728099657	-0.411502828	-1.353909354	-0.458776263	1.450425451	1
NDRG4	-0.505544788	-0.663691668	-0.488444988	-0.072600093	2.090949869	-0.656397793	-0.599357523	-0.417713506	1.31280049	1
NDUFAF7	-0.458111125	-0.460402045	-0.504713081	-0.567820342	2.048335681	-0.467741791	-0.543786587	-0.480888002	1.435127294	1
NEFL	-0.382975923	-0.439406533	-0.464871645	-0.464871645	2.47579337	-0.464871645	-0.464871645	-0.464871645	0.670947314	1
NEFM	-1.089724895	-0.784003349	-0.740548884	-0.477913725	0.916193844	-0.721986919	0.700997135	0.338369893	1.858616901	1
NEGR1	-0.751175302	-0.424718218	-0.751175302	0.228785441	2.247582465	-0.751175302	0.523609624	-0.751175302	0.429441898	1
NEK8	0.123845426	-0.91575254	0.660252975	-0.729691897	1.045747097	-1.214674848	0.597368384	-1.040150026	1.47305543	1
NES	-0.750940362	-0.869026317	-0.132406709	-0.220602974	1.673655791	-0.819944866	-0.195218033	-0.400871648	1.715355117	1
NETO2	-0.232202366	-0.747525205	-0.700540822	0.332177809	2.353251145	-0.730991555	-0.760681665	0.33562814	0.15088452	1
NF2	-0.307658445	-0.559015134	-0.597132254	-0.3002374	2.261277139	-0.57286538	-0.574633634	-0.437417025	1.087682135	1
NFE2L1	-0.837670038	-0.019094512	-0.583455924	-0.480054195	2.307699968	-0.452588223	-0.116751835	-0.672776455	0.854691213	1
NFKBIZ	-0.749067928	-0.230227	-0.471928857	-0.818187632	1.838787764	0.630423398	1.27486111	-0.701360638	-0.773300215	1
NFYC	-0.868580101	0.061480998	-0.171241642	-1.030188599	1.912061345	0.593061866	-0.32240307	-1.093167096	0.9189763	1
NHSL1	-0.491557885	0.158313836	-1.281818166	0.611673413	0.573965795	-0.289569041	-1.596092249	0.963248145	1.351836151	1
NHSL2	-0.409250757	-0.412020834	-0.333259238	-0.550301476	1.397091669	-0.799511973	-0.289956367	-0.642589668	2.039798645	1
NIPSNAP2	-0.719891011	-0.620762537	-0.273149718	-0.709044749	1.931494392	-0.576094976	0.073530368	-0.56584589	1.459764121	1
NKD1	-0.464388202	-0.641266538	-0.641266538	0.239255713	2.245663498	-0.641266538	-0.533882473	-0.512808903	0.949959983	1
NKX1-2	-0.551182629	-0.551182629	-0.510441023	-0.283486293	2.0935729	-0.551182629	-0.498947589	-0.50952536	1.362375254	1
NLRC4	-0.651800421	-0.253091659	-0.643136952	-0.676604199	1.633784998	0.129685748	-0.557331006	-0.740618904	1.759112395	1
NLRC5	-0.673718088	0.569291009	-0.460320779	-0.62757402	2.43312308	-0.213090851	-0.289603791	-0.752785399	0.014678839	1
NLRP12	-0.466327575	-0.529851417	-0.521701075	-0.506087114	1.822919392	-0.524703838	-0.476986385	-0.499618118	1.702356129	1
NLRP9	-0.739574747	-0.721966898	0.768718891	-0.704337851	0.138450844	-0.7183951	0.549619725	-0.698449618	2.125934755	1
NME2P1	-0.736933321	-0.035696625	-0.103165675	-0.832089474	2.472741415	0.044636158	-0.303552338	-0.709075735	0.203135596	1
NME4	-0.842359102	-0.792122497	0.639124298	-0.497790691	2.028099559	-1.012159964	0.327751727	-0.53782868	0.687285351	1
NMRK2	-1.040682038	0.665723562	0.320156328	-1.201422116	1.956508485	0.341612234	-0.525072727	-0.794135084	0.277311357	1
NNT-AS1	-0.328835584	-0.740298052	-0.226173597	-0.262156489	1.899555861	-0.930669397	-0.523129759	-0.407960905	1.519667921	1
NODAL	-0.476749672	-0.474977271	-0.477094861	-0.477199734	2.317533241	-0.477049873	-0.476494441	-0.477075841	1.019108452	1
NOS1	-0.757317471	0.025494053	-0.757317471	-0.757317471	1.297174726	-0.757317471	0.006884417	1.985200357	-0.28548367	1
NOVA1	-0.585999029	-0.437646448	-0.416560029	-0.437557148	1.360760692	-0.407552762	-0.585999029	-0.585999029	2.096552783	1
NPAS3	-0.531245183	-0.968179077	-0.968179077	0.663154306	2.240970016	-0.314488054	-0.437647794	0.301111588	0.014503276	1
NPHS1	-0.74157517	-0.049073247	-0.791304626	-0.729414778	1.319017171	0.919885714	-0.730922423	-0.791304626	1.594691986	1
NPM1	0.021316882	-1.011968507	-0.485060258	-0.140986877	1.792857051	-0.789720052	-0.726444272	-0.183454963	1.523460997	1
NPM1P27	0.066238228	-0.907044072	-0.526348947	-0.226837464	1.992101598	-0.81052326	-0.699759704	-0.189178124	1.301351744	1
NPTX1	-0.474664257	-0.43095328	-0.374816384	-0.343452398	-0.302584806	-0.474664257	0.03739779	-0.270480374	2.634217966	1
NQO2	-0.203618564	-0.199821475	-1.09496082	-0.455622287	2.175185679	0.34564726	-0.994350429	-0.325231977	0.752772614	1
NR1H2	-0.835087844	0.796920269	-1.356246769	-0.93063714	1.602173945	0.994720893	-0.40072645	-0.279606032	0.408489127	1
NR2F1	-0.346749719	-0.603323607	-0.603323607	-0.284009448	2.328056626	-0.219466788	-0.603323607	-0.603323607	0.935463758	1
NR2F1-AS1	-0.728005654	-0.728005654	-0.728005654	-0.728005654	2.133649886	0.583537259	0.336433767	-0.728005654	0.586407359	1
NR5A2	-0.418510447	-0.629487907	-0.613568466	-0.19395379	1.105634519	-0.517564753	-0.608228217	-0.365076652	2.240755711	1
NRCAM	-0.725279471	-0.005425688	-0.053264948	0.324430023	-0.13582029	0.810929629	-1.430226243	-0.790267896	2.004924883	1
NRDC	-0.442766886	-0.169017249	-0.890824017	-0.109162439	2.140165262	-0.066958533	-1.206370519	-0.198638118	0.9435725	1
NRG1	-0.443304232	-0.443304232	-0.443304232	-0.443304232	2.502791065	-0.443304232	-0.443304232	-0.443304232	0.600338562	1
NRIP3	-0.254834117	-0.587665048	-0.767648825	-0.340000029	1.357608403	-0.373747313	-0.767774041	-0.318101636	2.052162607	1
NRN1	-0.515339353	-0.515339353	-0.483475134	-0.482189629	0.969662297	-0.509047209	-0.334903974	-0.46850508	2.339137436	1
NRP2	-0.582880732	-0.823219342	-0.738927572	-0.081066489	1.326305071	-0.78565116	-0.633758162	0.4658228	1.853375586	1
NSD1	-0.401898357	-0.725720931	-0.491216993	-0.709579969	1.782403381	-0.970642947	0.956597372	-0.549424865	1.10948331	1
NSUN5	-0.478203484	-0.43282585	-0.046252748	-0.855660179	1.574631119	-0.61071108	-0.27328524	-0.721964838	1.8442723	1
NTF3	-0.440613086	-0.415485836	-0.543685556	-0.287131784	2.316230275	-0.543685556	-0.543685556	-0.543685556	1.001742654	1
NTMT1	0.966735098	0.363785847	-1.275741581	-0.430449068	0.84320244	-0.243992944	-1.56675535	-0.032991705	1.376207264	1
NTRK2	-0.530775952	-0.530775952	-0.530775952	0.599789381	2.434612454	-0.530775952	-0.530775952	-0.530775952	0.15025388	1
NUDT16P1	-0.777482393	0.317763954	1.079368488	-0.365892879	0.342044977	-0.339543235	0.568873432	-2.009330121	1.184197777	1
NUDT4	-0.20826668	-0.711572276	-0.738716657	0.032379632	0.806310804	-0.742376364	-0.702892639	-0.016955612	2.282089791	1
NUTM1	-0.214731829	-0.689839098	-0.586004753	-0.235003915	2.113707829	-0.689839098	-0.556712503	-0.424419072	1.28284244	1
NXN	0.396544616	-0.788031427	-0.72447161	0.347126185	2.082716152	-0.809568702	-0.802540692	-0.519749842	0.817975319	1
OCLN	0.277973342	-0.112034766	-1.459718399	0.479369701	1.193949843	-0.092561533	-1.615750595	0.106688251	1.222084155	1
OIP5-AS1	-0.55054815	-0.059648717	-0.353970253	-0.823079321	1.680349901	-0.39985282	-0.205931473	-0.987304149	1.699984981	1
OLAH	-0.513059659	-0.480498075	-0.511690182	-0.511026358	1.579791524	-0.471516348	-0.512900322	-0.512723082	1.933622502	1
OLFM2	-0.582198602	-0.582198602	-0.430057809	-0.448911326	2.039820611	-0.582198602	-0.25709767	-0.582198602	1.425040601	1
OLFML3	1.232107343	-0.645388928	-0.657666251	-0.398593644	2.030216077	-0.659387019	-0.656640866	-0.599979634	0.355332922	1
OPRD1	1.559621501	0.699159096	-0.770609212	-0.056589775	1.067484854	-1.116168025	-0.968487075	-0.939505414	0.525094051	1
OR52A1	1.065148599	0.434325504	-0.603214705	-0.603214705	2.119814128	-0.603214705	-0.603214705	-0.603214705	-0.603214705	1
OR7E12P	-0.869496604	-0.637499527	-0.551529575	0.012622969	1.992226679	-0.869496604	-0.597718401	0.376771048	1.144120013	1
ORC1	-0.18670362	-1.035729678	-0.260489512	-0.144770795	1.56924265	-1.019047953	-0.569133143	-0.077516953	1.724149004	1
OTUD1	-0.969322862	-0.082165669	-0.866356177	-0.839394721	1.969506417	0.604745664	0.33681573	-0.860673147	0.706844765	1
OTX2	-0.654242086	-0.641034855	-0.008470182	-0.660005028	1.907769643	-0.669498681	-0.14154267	-0.625178351	1.49220221	1
OVOL2	0.474370587	-0.841560377	-0.813265808	-0.027763477	1.982075059	-0.88123274	-0.784409648	-0.139958281	1.031744684	1
P4HA1	-0.555452989	-1.205288212	0.314458848	-0.076830341	1.653302551	-1.2049217	0.178936103	-0.422583685	1.318379424	1
P4HA2	-0.711167106	-0.79987771	1.266032979	-0.502544402	1.827318555	-0.887476873	0.45796739	-0.800094739	0.149841906	1
PAAF1	-0.563498809	0.307666374	-0.80833796	-0.419923775	0.751502551	0.143124563	-0.901750537	-0.711752611	2.202970205	1
PACRG	-0.580511993	-0.580511993	-0.367732775	-0.580511993	2.475381158	-0.020285932	-0.307706569	-0.580511993	0.542392091	1
PAH	-0.876021965	-0.277291493	-0.534105769	-0.276931061	1.481033954	-0.876021965	0.585220339	-0.876021965	1.650139926	1
PAM16	-1.015381166	0.610859874	0.053714455	-0.69586077	1.284514856	0.072610272	-0.036965876	-1.622465827	1.348974182	1
PAN2	-0.937253069	-0.234979867	1.114842492	-0.64265915	1.399076044	-0.837934626	0.200496104	-1.194583709	1.132995782	1
PAPSS2	-0.550823889	-0.524779451	-0.545272658	-0.584892781	2.083337008	-0.145724065	-0.538002342	-0.547146441	1.35330462	1
PARN	-0.314447705	-0.829980619	-0.051158774	-0.358774362	2.053538893	-1.016326884	-0.488610204	-0.234161574	1.239921229	1
PARP1	-0.068837544	-0.983127894	-0.657598174	0.127623207	1.792073107	-0.988910939	-0.625150712	-0.010146953	1.414075902	1
PARP6	-0.935095778	1.446462565	-0.986073624	-0.43374226	1.795437932	-0.13903034	-0.222685595	-0.732953847	0.207680946	1
PARVB	-0.54615341	-0.618653235	-0.345622509	-0.610631769	1.672789044	-0.58971977	-0.267685592	-0.52117455	1.826851792	1
PASK	0.109936824	-1.145105705	-0.281619298	-0.097044523	1.786890753	-1.149101905	-0.015471565	-0.542596781	1.3341122	1
PAX3	0.260314169	-0.408698577	-0.408698577	-0.408698577	-0.408698577	-0.408698577	-0.408698577	-0.408698577	2.600575868	1
PBX1	-0.339970698	-0.699731578	-0.666446585	-0.172400536	1.385592278	-0.757207515	-0.684507534	-0.054345056	1.989017224	1
PCBP4	-0.203029504	-0.48423264	-0.653176731	-0.031878852	2.543544682	-0.560058868	-0.645194886	-0.202646373	0.236673172	1
PCDH19	-0.475490494	-0.487317053	-0.487317053	-0.443161488	2.446707178	-0.487317053	-0.314997348	-0.487317053	0.736210365	1
PCDH9	-0.493291357	-0.50667973	-0.459131929	-0.44836188	2.377772253	-0.496664646	-0.433526165	-0.438616722	0.898500174	1
PCDHGB6	-0.298128675	-0.61643232	-0.612341641	-0.270850154	2.413856702	-0.506740895	-0.476638659	-0.409947798	0.777223441	1
PCDHGC3	-0.298929771	-0.732243091	-0.455364262	0.184369974	2.465465066	-0.74333884	-0.682987069	0.109396978	0.153631015	1
PCED1B	-0.74469591	-0.694657766	-0.325851092	-0.753698933	1.169232955	-0.616974835	0.455884614	-0.50791754	2.018678507	1
PCSK9	-0.515087707	-0.515087707	-0.387556534	-0.515087707	2.268910077	-0.515087707	-0.406082089	-0.515087707	1.10016708	1
PDCD2L	0.085002071	-0.620301455	-0.659225867	-0.298047379	2.004361962	-0.678566359	-0.8466555	-0.32283853	1.336271057	1
PDE1A	-0.604110931	-0.664333386	-0.407682729	-0.214641128	2.48102441	-0.574235374	0.505633719	-0.489387479	-0.032267102	1
PDE1C	-0.545483432	-0.491399088	-0.530967967	-0.422206602	1.767376092	-0.601381292	-0.699993636	-0.20341166	1.727467586	1
PDE4C	-0.418326393	-0.711758002	-0.448753945	-0.493254565	2.403817043	-0.789083168	0.183244967	-0.311042736	0.585156799	1
PDE6G	-0.570494682	-0.308371967	-0.494413427	-0.570575593	2.320700755	-0.306782654	-0.52611515	-0.529893366	0.985946084	1
PDGFRA	-0.404659779	-0.620502279	-0.607594453	-0.329673152	2.482406539	-0.514693654	0.086566703	-0.562842846	0.470992922	1
PDHX	-0.19863937	-0.151950679	-1.211039776	-0.670999382	1.077987779	0.784172022	-1.48110827	0.516056718	1.335520957	1
PDLIM7	0.618678462	-0.612999269	-0.346549523	-0.278596975	2.425819736	-0.785581606	-0.619549743	-0.397695675	-0.003525407	1
PDPR	-1.096603293	0.344923583	-0.032778458	-0.932280859	1.795430477	-0.235223005	0.147710979	-1.115301509	1.124122085	1
PEG13	-0.547400948	-0.687923011	-0.668147293	-0.130980129	2.185433191	-0.576022857	-0.012113138	-0.664575881	1.101730067	1
PELI1	-0.49326281	-0.361069273	-0.729178337	-0.441514827	1.745999681	-0.564700193	-0.577294689	-0.33576041	1.756780859	1
PENK	-0.79611808	-0.79611808	0.210302806	-0.355266212	0.360203366	-0.79611808	0.064107144	-0.281598022	2.390605158	1
PER2	-1.013193441	0.953553507	-1.027131696	-0.358120006	0.029677403	0.299079009	-0.848918697	-0.051691316	2.016745237	1
PER3	-0.063513361	-0.184288715	-1.135269546	0.000305913	1.654038391	0.135107922	-0.99775951	-0.87663324	1.468012146	1
PEX16	-0.365335606	-0.198196665	-1.302339305	0.628932071	1.500773804	-0.024346171	-1.400883601	-0.069608126	1.231003599	1
PFKFB2	-1.043435395	0.891197886	-0.626958728	-0.707915739	1.646769489	0.369057344	-0.98764036	-0.574898517	1.03382402	1
PFKL	-0.861040341	-0.901960375	-0.179897877	-0.587112529	1.748964755	-0.708432916	0.520980742	-0.455655536	1.424154077	1
PHF23	-0.235891133	0.160687982	-1.294240005	-0.836508012	1.261896908	0.641395706	-0.983991835	-0.290480218	1.577130607	1
PHKA1	-0.490208744	-0.561303626	-0.594289128	-0.37350581	1.49223141	-0.512969857	-0.558905676	-0.398722185	1.997673616	1
PHLDB1	0.28597832	-0.47746623	-1.292684992	0.0546598	0.972560816	1.916297662	-0.882305919	-0.764543857	0.1875044	1
PHYHD1	-0.65695662	-0.714253446	0.933114008	-0.594787434	1.334703661	-0.958378121	0.183684385	-0.985919349	1.458792915	1
PIAS1	0.070235937	-0.455451261	-0.868546622	0.392242976	0.738265887	-0.622220486	-1.163300826	-0.222946604	2.131721	1
PIAS2	-0.415168559	-0.699165968	-0.615315833	-0.447223614	1.590280184	-0.622279783	-0.379356613	-0.310151019	1.898381204	1
PIF1	-0.262129678	-0.798636316	-0.337201937	-0.239039654	2.329106039	-0.804030521	-0.410999655	-0.349178649	0.872110371	1
PIGL	-0.627586022	0.676723197	-0.443737334	-0.508021238	1.19243183	-0.211179639	-1.055050759	-0.860284086	1.836704052	1
PIGO	-0.458183907	-0.46928121	0.527084843	-1.23422122	0.825450196	0.45418483	-0.117892372	-1.305545606	1.778404446	1
PIK3IP1	-0.968249513	0.321978361	-0.542090523	-0.854005749	1.131132375	0.246527632	-0.262729422	-0.967417885	1.894854723	1
PIK3R5	-0.551374712	-0.551374712	-0.493329384	-0.297113402	2.082913532	-0.490243735	-0.526567964	-0.551374712	1.37846509	1
PIM2	-0.418672792	-0.567864991	-0.515273875	-0.359046716	2.320402465	-0.550981364	-0.510596154	-0.398283692	1.00031712	1
PITPNC1	-0.257102926	-0.856763339	-0.620527272	-0.148957436	2.132634811	-0.817185936	-0.324120721	-0.286716904	1.178739724	1
PIWIL2	-0.631448299	-0.529417436	-0.269205969	-0.529306439	1.463920227	-0.615233713	-0.153781093	-0.713810416	1.978283138	1
PKD1P6	-0.881941024	-0.787651247	-0.387897627	-0.126432988	1.79169464	-1.020128706	0.8571529	-0.527278883	1.082482934	1
PKLR	-0.460064217	-0.43383441	-0.450078203	-0.451315685	2.465645861	-0.449547353	-0.460064217	-0.460064217	0.699322443	1
PKNOX2	-0.486517306	-0.486517306	-0.486517306	-0.486517306	2.5145506	-0.093535054	-0.486517306	-0.486517306	0.498088289	1
PLA2G2A	-0.343097743	-0.290737161	-0.380958599	-0.369656795	-0.361456712	-0.316861341	-0.267552878	-0.334530207	2.664851436	1
PLA2G4A	-0.49298931	-0.589655567	-0.578599917	-0.139836715	2.283359986	-0.595833995	-0.582457664	-0.324567049	1.02058023	1
PLAGL1	-1.414710274	-0.640012685	-0.297463304	0.249161755	2.022968674	-0.881864786	0.306110309	0.688167384	-0.032357072	1
PLCB4	0.745177632	-0.73644034	-0.73644034	0.03601244	2.270009732	-0.616622548	-0.712129513	-0.503786696	0.254219633	1
PLEKHB2	-0.540296218	-0.124913055	-0.685686251	-0.62720369	1.709152536	0.152540114	-0.828039081	-0.700981813	1.645427458	1
PLEKHG1	-0.216554186	-0.916004068	-0.837504002	-0.165289746	1.886967771	-0.742187167	-0.089428527	-0.377229736	1.45722966	1
PLEKHG4	-0.194937873	-0.447173072	-0.608989133	-0.577741377	2.091747953	-0.394168923	-0.651782039	-0.555896583	1.338941048	1
PLIN3	0.71635393	0.278775696	-0.8772265	-0.519105607	1.392626791	1.046784374	-1.760985728	-0.451229673	0.174006717	1
PLPP3	-0.294297138	0.455572771	-1.465538941	0.535348466	1.221229608	0.466675159	-1.74613154	0.706142025	0.120999589	1
PLS3	-0.213837092	-1.021041775	-0.02843692	-0.244186507	1.566579981	-0.96546158	-0.351291945	-0.50048544	1.758161277	1
PLSCR4	-0.763699421	-0.472277357	0.149746739	-0.561454756	1.58991027	-0.704236576	-0.210092737	-0.801516731	1.773620567	1
PMAIP1	-0.955225372	-0.43430282	-0.864624658	-0.528717773	0.682620317	0.725476145	-0.929301108	0.326950015	1.977125254	1
PMEPA1	-0.483876958	-0.47155785	-0.483876958	-0.483876958	2.269693267	-0.483876958	-0.483876958	-0.483876958	1.10512633	1
PMP22	-0.304285434	-0.650869861	-0.099912731	-0.51014326	2.538837728	-0.632272978	-0.218770036	-0.456709403	0.334125975	1
PNPLA4	0.180417812	-0.767928362	-0.720468385	-0.211614079	1.695519526	-0.685938461	-0.760410626	-0.385418695	1.655841269	1
PNPLA5	-0.408746975	-0.408746975	-0.408746975	-0.408746975	2.600478973	-0.408746975	-0.408746975	0.26074985	-0.408746975	1
POLA1	-0.202122153	-0.987129326	-0.42870911	-0.040876205	1.782329264	-1.015407603	-0.553206946	-0.06524697	1.51036905	1
POLDIP3	-0.65182496	0.5736794	-0.188286019	-0.480859866	1.726732085	0.177604417	-1.486206328	-0.758243425	1.087404696	1
POLR2D	0.149368762	0.766049027	-1.092100369	-0.533560358	0.98916908	0.519998791	-1.705187704	-0.367329635	1.273592405	1
POLR2G	-0.597694604	0.321145114	-0.857365921	-0.514361451	1.561149912	0.08551248	-0.754354699	-0.894942322	1.65091149	1
POLR3G	0.140537595	-1.078531064	-0.411038664	-0.362833287	2.079342121	-1.039857252	-0.251562121	-0.095403697	1.01934637	1
POMGNT2	0.039659911	-0.948727486	-0.738787558	0.176002576	2.097120567	-0.940203671	-0.693346335	0.150152129	0.858129866	1
POU5F1	-0.498916422	-0.501469818	-0.498870798	-0.500365364	2.015349783	-0.502021546	-0.492326526	-0.502021546	1.480642237	1
POU5F1B	-0.482340741	-0.482340741	-0.482340741	-0.482340741	2.310522447	-0.482340741	-0.448280053	-0.482340741	1.031802052	1
PPP1R14A	0.082322784	-0.74076452	-0.845105376	-0.366184212	1.410362629	-0.414537703	-0.833891668	-0.214176391	1.921974458	1
PPP1R14C	-0.312572766	-0.905906296	-0.905906296	-0.905906296	1.515125856	-0.01822781	-0.185472396	-0.044090884	1.762956887	1
PPP1R1B	-0.57351285	0.134937805	-0.303796864	-0.57351285	2.52537332	-0.57351285	-0.342976592	-0.57351285	0.280513731	1
PPP2R2C	-0.549454821	-0.549454821	-0.549454821	-0.00873781	2.570717934	-0.419452505	0.083599234	-0.549454821	-0.028307569	1
PPP2R2D	-1.06045562	-0.003280091	-0.842397394	-1.304224809	1.229907599	0.534514352	1.501961154	-0.480203031	0.424177841	1
PPP2R5B	0.425789013	0.190688181	-0.743696228	-1.284706902	1.943966738	-0.180305445	0.951115822	-0.567947463	-0.734903716	1
PPT2	-0.080175087	-0.263774981	-0.716196756	-0.270376821	1.828265496	-0.565841642	-1.285073557	-0.067815337	1.420988684	1
PRB3	-0.562462985	-0.533329534	0.336631071	-0.384511125	2.438870066	-0.324386267	-0.681968993	-0.681968993	0.39312676	1
PRDM14	-0.495832613	-0.495832613	-0.495832613	-0.495832613	2.099223368	-0.495832613	-0.493422818	-0.495832613	1.369195126	1
PRDX1	-0.321461559	-0.810938305	-0.533786074	-0.200591576	1.828922311	-0.762307137	-0.530953436	-0.28837131	1.619487086	1
PRICKLE2	-0.582574039	-0.553411697	-0.362328563	-0.553322128	2.324111492	-0.433745596	-0.048574765	-0.702198507	0.912043803	1
PRKN	-0.536655223	-0.562319302	-0.497458336	-0.362255052	1.566106754	-0.580495025	-0.491776856	-0.474366364	1.939219403	1
PRMT3	0.323339654	-0.713608448	-0.429555007	-0.264881545	1.427801532	-0.95030367	-0.751509772	-0.482970329	1.841687584	1
PROCA1	-0.371299433	-0.499276921	-0.380973592	-0.545696168	1.921584667	-0.67594382	-0.327920799	-0.684121153	1.563647217	1
PRODH	-0.497215405	-0.498743242	-0.496572842	-0.496841801	1.416393587	-0.494171689	-0.498743242	-0.498743242	2.064637877	1
PROM1	0.0120395	-0.677405698	-0.675016905	-0.281348864	1.907998492	-0.676776753	-0.674343013	-0.438653148	1.50350639	1
PRORSD1P	-0.360532625	-0.640996617	-0.31455031	-0.569445592	1.831322999	-0.65873545	-0.398514346	-0.555979179	1.667431118	1
PROS1	-0.307515029	-0.957838832	-0.315611903	0.418612215	2.371315174	-0.838496774	-0.069506025	-0.560845427	0.259886602	1
PROX1	0.145051235	-0.785938467	-0.345093071	0.179599524	2.506355658	-0.553798249	-0.032324628	-0.560561794	-0.55329021	1
PRPS1	-0.214823222	-0.72209431	-0.442547872	-0.335001793	1.600178008	-0.700223325	-0.529220446	-0.530337786	1.874070746	1
PRR15	-0.6433116	-0.846304309	-0.678891119	0.244010676	2.120578153	-0.76189443	0.786105028	-0.67136119	0.451068789	1
PRR19	-0.383420071	-0.804681627	-0.401555184	-0.318556288	2.312666739	-0.634170126	-0.301496464	-0.42727115	0.958484171	1
PRRG3	-0.513591992	-0.351177127	-0.318127442	-0.496449256	2.467543987	-0.513774877	-0.470200653	-0.481869876	0.677647236	1
PRRX1	-0.434800923	-0.434800923	-0.434800923	-0.434800923	2.532957759	-0.434800923	-0.434800923	-0.434800923	0.5106487	1
PRSS23	-0.323651068	-0.45969271	-0.460613554	-0.389578297	2.548309291	-0.471551664	-0.483043159	-0.409991579	0.44981274	1
PRUNE1	-1.183637823	0.10030635	-0.570076876	-0.677498924	0.230086209	0.845801715	-0.425136505	-0.47225294	2.152408793	1
PSEN2	-0.034587604	-0.369296962	-0.682094624	-0.022217801	2.022299215	-0.494982914	-0.972203288	-0.714377878	1.267461856	1
PSMD9	0.604216026	-0.746412879	-0.74627773	-0.088930115	1.927739302	-0.300085814	-1.214695077	-0.449875739	1.014322026	1
PSORS1C2	-0.463197789	-0.463197789	-0.463197789	-0.268705227	2.618894749	-0.365778978	-0.368320446	-0.368617337	0.142120607	1
PTCHD1	-0.672781427	-0.019682048	-0.779378007	-0.521107718	1.066007111	-0.025676325	-0.471145391	-0.75362728	2.177391087	1
PTGIS	-0.808704316	-0.773682347	-0.631579217	0.749962842	1.896006036	-0.726579648	-0.632142443	-0.182516333	1.109235426	1
PTMAP5	-0.454680471	-0.913861474	-0.301938641	-0.261471988	2.262463295	-0.858980486	-0.096778384	-0.294486711	0.919734861	1
PTP4A3	-0.547289033	-0.49697109	-0.489819031	-0.547289033	1.532650487	-0.547289033	-0.473606422	-0.400384949	1.969998104	1
PTPN5	-0.792325662	-0.792325662	-0.792325662	0.947021471	1.488763156	-0.792325662	-0.792325662	0.22267405	1.303169633	1
PTPRK	-0.671404613	-0.221568601	-0.934696598	0.238256049	2.349797948	-0.015704533	-0.946064468	-0.156782444	0.35816726	1
PTPRN2	-0.501912249	-0.501912249	-0.501912249	-0.501912249	2.580602338	-0.003288891	-0.232125999	-0.501912249	0.164373798	1
PTPRR	-0.95802255	1.238519728	-0.628577601	-1.034157149	1.264718338	0.873734382	-0.456384031	-1.006510821	0.706679703	1
PTRH2	0.522569076	0.609058587	-1.337010871	0.05195487	0.212615437	0.065039683	-1.632636827	-0.171290222	1.679700267	1
PTX3	-0.448484144	-0.429171426	-0.46146692	-0.46146692	2.462741303	-0.46146692	-0.445703051	-0.46146692	0.706484999	1
PUS3	-0.37711466	-0.093062909	-1.134856999	-0.314920049	0.168359664	0.449340961	-1.079334663	0.13465728	2.246931376	1
PWAR5	-0.270258216	-0.455843478	-0.455843478	-0.455843478	2.542906975	-0.455843478	-0.455843478	-0.455843478	0.462412107	1
PYCARD	-0.621271694	-0.552166195	-0.489725077	-0.148766526	2.280611024	-0.593563784	-0.553809033	-0.352265469	1.030956754	1
PYDC1	-0.509543392	-0.509543392	-0.509543392	-0.48835353	1.685843924	-0.509543392	-0.488869719	-0.509543392	1.839096286	1
PYY	-0.680076879	-0.518436157	-0.618538245	-0.356600834	2.006692506	-0.356026939	-0.574878176	-0.36546834	1.463333064	1
RAB32	-0.434805262	-0.636448092	-0.55106483	-0.611357046	2.536986164	-0.415840004	0.089682896	-0.22407917	0.246925344	1
RAB3B	-0.325640945	-0.548511619	-0.683320016	-0.299073796	1.753011137	-0.592585069	-0.771487897	-0.251179652	1.718787857	1
RAB5A	-0.218847705	0.359285473	-1.120069204	-0.239545035	1.50127071	0.003113203	-1.345566176	-0.440524165	1.500882899	1
RAD54L2	-1.448529186	1.277399433	-0.419493267	-0.641854099	0.86778462	0.353094256	-0.951469232	-0.365606665	1.32867414	1
RAMP2	-0.364942852	-0.364942852	-0.101961874	-0.364942852	2.656561835	-0.364942852	-0.364942852	-0.364942852	-0.364942852	1
RAMP3	-0.359171242	-0.359171242	-0.359171242	-0.359171242	2.660020335	-0.359171242	-0.359171242	-0.359171242	-0.145821644	1
RAP1GAP2	-0.660558694	1.659184193	-0.064388082	0.062653041	1.706563162	-0.586991948	-0.632155795	-0.891448802	-0.592857075	1
RAP2B	-0.52833827	-1.15517357	0.960392817	-0.545045262	0.759681808	-1.067962284	0.751048808	-0.715271561	1.540667514	1
RARB	-0.441378712	-0.523135707	-0.497326473	-0.489219335	1.300546556	-0.495954471	-0.490045544	-0.509941061	2.146454748	1
RARRES3	-0.893889517	-0.072892559	-0.06263321	-1.082636808	0.339492329	1.409809223	-0.938530888	-0.395614233	1.696895664	1
RASGEF1A	-0.905917456	-0.738788033	-0.361457014	-0.396054401	1.845420398	-0.141900324	-0.436588478	-0.453444396	1.588729705	1
RASGRP2	-0.429494999	-0.56401212	-1.105130167	0.932166697	1.813982507	-0.46482367	-1.060282842	-0.003524711	0.881119304	1
RASGRP4	-0.449235629	-0.468632593	-0.468036864	-0.460242575	2.414646421	-0.472823818	-0.472823818	-0.443456576	0.820605453	1
RASSF4	-0.152424297	-0.5255518	-0.552436636	-0.296746981	0.866424753	-0.749669979	-0.725591021	-0.194321016	2.330316977	1
RB1CC1	-0.887551252	-0.493988093	-0.469838109	-0.491703884	1.05779587	-0.669058813	0.571509825	-0.660691706	2.043526162	1
RBFOX3	-0.889050519	-0.657875834	-0.625017277	-0.426422781	2.144544357	0.223225855	-0.212013468	-0.619083151	1.061692816	1
RBKS	-0.18402183	0.904216544	-1.19699951	-0.214090114	0.831341186	0.434040295	-1.054561437	-1.094696828	1.574771694	1
RBMS3	-0.445682249	-0.434966396	-0.443545789	-0.438117942	2.513345699	-0.450762162	-0.44151001	-0.428626479	0.569865329	1
RBPMS2	-0.408387443	-0.622755551	-0.503469969	-0.563776419	1.776914167	-0.415538576	-0.525837238	-0.479896208	1.742747235	1
RCHY1	-0.341073593	0.126630825	-0.686166413	-0.694520972	1.442179801	0.149367848	-1.224950632	-0.516464501	1.744997635	1
RCN3	-0.566873572	-0.61900081	-0.364278127	-0.037618263	2.439384185	-0.633542757	-0.551505227	-0.307444982	0.640879555	1
RDH12	-0.332252504	-0.13277097	-0.792861974	-0.758848439	2.13699293	0.544535538	-1.074101782	-0.327690515	0.736997716	1
REC8	-0.581250413	-0.430792782	-0.450187583	-0.559693724	1.899725117	-0.491134532	-0.409740639	-0.588290619	1.611365173	1
RENBP	-0.545947606	-0.22555115	-0.491253269	-0.519162324	2.573000591	0.050959002	-0.479684224	-0.513994292	0.151633271	1
RFTN2	-0.470429156	-0.884456117	-0.702838248	-1.266876548	0.860913693	1.572149705	1.151897754	-0.532602292	0.272241209	1
RFX4	-0.503716908	-0.503716908	1.70184455	-0.503716908	-0.503716908	-0.503716908	-0.503716908	-0.503716908	1.824173804	1
RGS2	-0.388087596	-0.065203429	-0.886078764	-0.474215868	0.033263827	0.955037402	-1.09764113	-0.236093052	2.159018611	1
RGS4	-0.371669336	-0.430484019	-0.430484019	-0.430484019	2.569351472	-0.430484019	-0.430484019	-0.430484019	0.38522198	1
RHBDL1	-0.44446068	-0.516483729	-0.716365806	-0.078974593	0.854390408	-0.445560679	-0.695453808	-0.304701781	2.347610667	1
RHOH	-0.75903084	-0.645816018	0.029790036	-0.456265768	2.021905693	-0.721274921	-0.188262798	-0.614046463	1.333001079	1
RHOJ	-0.452059136	-0.452059136	-0.452059136	-0.452059136	2.489382251	-0.431158205	-0.43509608	-0.452059136	0.637167715	1
RIF1	-0.240440341	-1.04987086	-0.421578236	-0.352814498	1.69130428	-1.137237587	0.305906122	-0.282130555	1.486861675	1
RIMBP2	-0.548649274	-0.548649274	-0.548649274	-0.341190884	2.444164015	-0.423953402	-0.548649274	-0.185460936	0.701038301	1
RIMKLB	-0.486969062	0.20026701	-0.778059184	-0.413290465	1.691210127	-0.267661281	-1.080146161	-0.482509997	1.617159013	1
RIN2	-0.277835769	-0.7805039	0.015460756	0.125113399	2.217377473	-1.054643555	-0.062047888	-0.881432652	0.698512137	1
RMND1	-0.557990343	-0.23547058	-0.807636188	0.264271299	1.519045112	-0.45953536	-1.144074189	-0.307473128	1.728863378	1
RNASET2	-0.42129398	-1.012372799	-0.242380931	-0.4601906	1.425378934	-1.025970841	0.466685732	-0.464550067	1.734694551	1
RND2	-0.246632582	-0.613702915	-0.575898304	-0.334848041	2.119879284	-0.608749562	-0.600321565	-0.442753024	1.303026709	1
RNF113A	-0.755467678	-0.198918701	-0.6061287	-0.582500085	1.50219469	0.306172106	-0.805812134	-0.661234949	1.801695449	1
RNF125	-0.498903188	-0.505542595	-0.518557843	-0.4774014	1.798884415	-0.504826152	-0.520215404	-0.501398677	1.727960844	1
RNF138	-0.027724464	-0.968350439	-0.490260864	0.051041111	1.494484496	-0.959161203	-0.70802863	-0.163201434	1.771201428	1
RNF146	-1.046933463	-0.435055325	-0.086988063	-0.8462964	2.009172717	0.209878605	0.761158894	-1.047683774	0.482746808	1
RNF152	0.161553331	-0.709179015	-0.709179015	0.374474421	2.133163081	-0.709179015	0.87670424	-0.709179015	-0.709179015	1
RNF41	-1.052667903	0.380495365	-0.845191093	0.449877672	0.483765971	0.511059109	-1.633527507	0.07488689	1.631301496	1
RNF44	-0.739172104	-0.869611891	-0.754397474	-0.195517967	1.962426463	-0.876740192	0.939252067	-0.205147547	0.738908644	1
RORA	-0.472663636	-0.182078336	-0.533147624	-0.517702358	2.435064085	-0.321317308	-0.548552786	-0.580810459	0.721208422	1
RPARP-AS1	-0.32420162	-0.255688906	-0.723972281	-0.325676975	1.060644262	-0.237585089	-1.249145559	-0.054946841	2.11057301	1
RPL3L	-0.666174039	-0.22207031	-0.325217008	-0.651109856	2.117728781	-0.395982607	-0.451015076	-0.691986339	1.285826454	1
RPL7P20	-0.488611996	-0.445780677	-0.488611996	-0.488611996	2.265456887	-0.488611996	-0.488611996	-0.488611996	1.111995767	1
RPP14	-0.15039328	-0.28879257	-0.88358007	-0.623566708	1.471420313	-0.404753846	-0.844987152	-0.185125087	1.9097784	1
RPP25L	-0.126027797	0.895399084	-0.719049668	-1.117496123	1.155674927	0.55315221	-1.438460939	-0.434771683	1.23157999	1
RRAS2	0.067835327	-1.063611233	-0.815514724	-0.071380238	1.949452851	-0.926396189	-0.226567494	-0.125551664	1.211733363	1
RSAD1	-0.868721669	0.17386868	-0.963608332	-1.048105522	0.249038648	-0.076020076	1.556982626	-0.565090738	1.541656382	1
RSPH4A	-0.737477123	-1.058098993	0.011555186	-0.60354954	1.396585441	-1.012037318	1.596562016	-0.224474608	0.630934939	1
RUNDC3A-AS1	-1.118208788	-0.737629384	0.329289391	-0.161523986	1.071274797	-0.543167395	0.128635953	-0.912614433	1.943943846	1
RXRG	-0.464617064	-0.464617064	-0.464617064	-0.464617064	2.400797055	-0.464617064	-0.464617064	-0.464617064	0.851522394	1
RYR1	-0.49981611	-0.407063587	-0.545608898	-0.530583616	1.957262083	-0.517222408	-0.589868041	-0.412632192	1.545532769	1
SAA1	-0.430132535	-0.393040016	-0.40218285	-0.431644434	2.599735912	-0.377160417	-0.398412484	-0.42916553	0.262002353	1
SALL2	0.403572808	-0.946833093	-0.418592774	0.076154239	2.087760193	-0.888272964	-0.780488566	-0.435147604	0.90184776	1
SALL4	0.103638637	-0.746779368	-0.757771126	-0.118439906	1.999663589	-0.762609333	-0.76326291	-0.230193394	1.27575381	1
SAMHD1	-0.327256131	-0.55086975	-0.529863679	-0.329279941	2.21447414	-0.586678981	-0.606044274	-0.457379973	1.172898589	1
SAPCD2	-0.370541476	-0.821250808	-0.655080066	0.068123098	1.580237628	-0.883842442	-0.566103461	-0.123655146	1.772112674	1
SAT2	-1.19628585	0.132759833	-0.279497552	-0.701035782	1.6039362	0.045055851	-0.633706767	-0.598332893	1.62710696	1
SAV1	-1.195557932	0.330160164	-0.659357306	-0.746519839	0.791830616	0.543830584	0.610400452	-1.272902617	1.598115878	1
SBNO2	-0.730890494	-0.12680156	-0.472041262	-0.545953842	2.548406567	-0.158867764	0.030043254	-0.632782229	0.088887331	1
SCAMP1-AS1	-0.391225642	1.001567818	-0.58035436	-0.590889977	1.818242192	0.810741709	-0.92827514	-1.154395039	0.014588439	1
SCGB3A2	-0.500304402	-0.500304402	-0.500304402	-0.500304402	1.499133137	-0.497999057	-0.500304402	-0.500304402	2.000692332	1
SCN3A	-0.49321014	-0.573938272	-0.229898289	-0.573938272	2.588323621	-0.090833052	-0.083832085	-0.573938272	0.03126476	1
SCNN1A	-0.518767297	-0.577814304	-0.57783276	-0.189288001	2.079850402	-0.59390003	-0.557055589	-0.427457094	1.362264673	1
SDSL	-0.199335786	0.343163336	-0.945477657	-0.268553671	0.039397529	0.191097634	-1.00563561	-0.513370016	2.358714241	1
SEC23A	-0.868958448	-0.592827412	1.453818107	-0.924387937	0.936082627	-0.57608204	0.488655554	-1.07057516	1.15427471	1
SELENBP1	-0.683388733	-0.513526413	0.004679154	-0.686933413	1.970504066	-0.294833417	-0.535396131	-0.69542959	1.434324477	1
SELENOV	-0.572404992	-0.035854658	-0.638045069	-0.494350437	1.98105027	-0.37137141	-0.627594998	-0.687371636	1.445942931	1
SEMA3C	-0.402049628	-0.471213374	-0.468207643	-0.368171907	2.51166115	-0.459477939	-0.452990833	-0.459888047	0.570338221	1
SEMA3E	-0.285722247	-0.722828412	-0.636761185	-0.44859295	1.920200952	-0.631214652	-0.259519298	-0.485060228	1.549498021	1
SEMA4A	-0.71900004	-0.270707828	-0.590997222	-0.588169436	0.727169585	-0.314577943	-0.153721483	-0.500867263	2.41087163	1
SEMA5A	-0.282140379	-0.693817131	-0.459890831	0.228402951	2.531402029	-0.693817131	-0.343912549	-0.394837424	0.108610467	1
SEPHS2	-0.471173211	-0.388404304	-1.030558003	0.047160856	1.629714481	-0.34059063	-0.927987238	-0.216110331	1.69794838	1
SEPT7P2	-0.979831158	0.552694093	-1.22764202	-0.809833582	0.965230841	0.296198067	-0.327272925	-0.301041913	1.831498597	1
SERAC1	0.519033839	0.356733678	-1.539014356	0.047754578	0.598129441	0.668905639	-1.802815679	0.068464507	1.082808352	1
SERINC5	-0.482140816	-0.559838707	-0.552797332	-0.554913336	2.032853327	-0.440464844	-0.381074203	-0.512803135	1.451179046	1
SERPINH1	-0.616435073	-0.432429909	-0.141856824	-0.525433536	2.47666976	-0.519409449	-0.217975989	-0.596948182	0.573819202	1
SETP14	-0.312375241	-0.593195716	-0.474285619	-0.175716361	1.956423893	-0.620404921	-0.871236338	-0.38418977	1.474980072	1
SEZ6L2	-0.644084951	-0.625871756	-0.555717604	-0.346565557	1.756936835	-0.637464883	-0.600427692	-0.05211705	1.705312658	1
SFRP5	-0.351165864	-0.351165864	-0.351165864	-0.351165864	2.663566474	-0.351165864	-0.351165864	-0.351165864	-0.205405427	1
SGPL1	-0.442073279	-0.346933496	-0.808373428	0.417450094	2.068054768	-0.34541048	-1.017365872	-0.572808966	1.04746066	1
SH2D3C	-1.295508567	0.268357727	-0.609815697	-0.393693307	1.602805493	0.236889022	-0.27234803	-0.975854632	1.439167992	1
SH3BGRL	-0.541281294	-0.619507335	-0.535571315	-0.495804624	2.046170384	-0.624926078	-0.222348303	-0.417283255	1.41055182	1
SHD	-0.86179039	-0.513905241	-1.020832672	0.645265586	1.114961455	-0.474177867	-1.18650991	1.046311068	1.250677972	1
SHPK	-0.349659999	-0.740003677	-0.586555857	-0.32331915	2.114297847	-0.73663397	-0.371323853	-0.290026761	1.283225421	1
SHROOM3	0.184612105	-0.777468762	-0.848938196	-0.048526707	1.282405465	-0.624637527	-0.620847199	-0.530684923	1.984085745	1
SIAE	-0.246203262	-1.160365652	0.436953817	-0.119401075	0.784132493	-0.732977015	-0.591758793	-0.518911156	2.148530643	1
SIRT1	-0.84451011	-0.058892224	-0.329460543	-0.745843766	1.281712548	-0.377720934	-0.045904713	-0.889353107	2.009972849	1
SKIL	-0.89150914	0.128410524	-0.141480532	-0.738624767	2.273653684	-0.102370292	-0.528597324	-0.762546059	0.763063907	1
SLC13A5	-0.745846854	-0.745846854	1.416693404	-0.745846854	1.738791122	-0.745846854	0.178354837	-0.745846854	0.39539491	1
SLC15A1	-0.454125898	-0.4973511	-0.519222895	-0.451385829	0.878046008	-0.463524198	-0.42336624	-0.45646423	2.387394381	1
SLC16A10	-0.365121804	-0.639553305	-0.591177855	-0.280563913	1.698105302	-0.639553305	-0.615230781	-0.363144192	1.796239852	1
SLC16A9	-0.560219061	-0.53521911	-0.360345418	-0.553965311	2.203706481	-0.560219061	-0.261250094	-0.560219061	1.187730635	1
SLC17A9	-0.641210184	-0.641210184	-0.336836116	-0.607878238	2.375028438	-0.641210184	0.496988929	-0.446700906	0.443028445	1
SLC22A20	0.329596153	-0.351610487	-0.832540035	-0.532967414	2.466335737	-0.039353825	-0.819203559	-0.18377483	-0.036481739	1
SLC25A12	-0.460075135	-0.473610375	-0.39594753	-0.44993768	2.028717374	-0.533059424	-0.613062358	-0.558197972	1.455173102	1
SLC25A20	-0.0345921	0.399478385	-0.466641259	-1.269848351	1.958753822	0.27667132	0.049394341	-1.372104194	0.458888037	1
SLC25A25-AS1	0.25599516	-0.721007499	-0.877758857	0.115018395	2.080880925	-0.855170641	-0.868678001	-0.031471614	0.902192131	1
SLC25A35	-1.032621696	1.039622477	-0.01846244	-1.423068552	1.490777155	0.429890378	0.074529797	-1.073259095	0.512591976	1
SLC25A38	-0.822164042	-0.113917996	-0.579849811	-0.309797296	1.845172792	-0.187487879	-0.660743871	-0.738651296	1.5674394	1
SLC25A42	-0.766504934	-0.254421839	-0.588808077	-0.77303525	2.327679607	-0.171717596	0.379605659	-0.708896997	0.556099426	1
SLC25A44	-0.431394296	-0.481663923	-0.738303029	-0.52359459	1.122883565	-0.229299316	-0.733518516	-0.192819504	2.207709609	1
SLC25A4	-0.311845924	-0.554490396	-0.339879891	-0.338807138	2.576975952	-0.485853214	-0.480425534	-0.390020549	0.324346693	1
SLC25A48	-0.429681626	-0.429681626	-0.429681626	-0.429681626	2.621578735	-0.429681626	0.074747721	-0.429681626	-0.118236699	1
SLC35A5	-0.580694929	-0.182469411	-0.396955491	-0.519241523	1.788411821	-0.331960825	-0.752184408	-0.706712173	1.68180694	1
SLC35F6	0.209520623	-0.665681834	-0.874703458	-0.365566552	1.555637798	-0.677932776	-1.163917993	0.536087066	1.446557125	1
SLC39A10	-0.224576151	-1.240022798	0.029187965	0.056623842	1.843347238	-0.941593129	-0.681384317	-0.123669049	1.282086399	1
SLC47A1	-0.466660252	-0.496003823	-0.501114096	-0.48774203	1.253573767	-0.474478374	-0.501570452	-0.504255681	2.178250941	1
SLC48A1	-0.665046158	0.189794673	-0.991728512	-0.074442768	2.106929635	0.877467336	-1.040511336	-0.483960095	0.081497225	1
SLC4A11	-0.155511684	-1.190416919	0.636894515	-0.672373526	1.169711244	-1.165675471	0.502034255	-0.643726801	1.519064386	1
SLC52A3	-0.444328208	0.495401699	-0.939461314	0.219380147	1.963696164	0.026723415	-1.418022198	0.662375135	-0.565764839	1
SLC5A5	-0.352097196	-1.003616162	-0.166912022	-0.285160226	1.212113135	-0.832571964	-0.349878635	-0.313838289	2.091961359	1
SLC7A3	-0.545535199	-0.613130069	-0.590536361	0.119242819	2.106065773	-0.613130069	-0.588990469	-0.514948698	1.240962273	1
SLC7A4	-0.597821035	0.752490255	-0.736068187	0.352150673	0.015142207	-0.59386516	-1.062395607	-0.325736145	2.196102998	1
SLC8B1	-0.66277075	0.114500011	-0.687793071	-0.711617223	1.19765372	0.027241264	-0.571628658	-0.761433079	2.055847787	1
SLC9A3-AS1	-0.838055606	-0.54352295	-0.192248166	-0.235210416	2.195560183	-0.665777124	-0.014308891	-0.748462689	1.042025658	1
SLCO3A1	-0.697274425	-0.537980607	-0.691479509	1.060473909	2.141492488	-0.620209025	-0.785844298	-0.046121141	0.176942609	1
SLCO4C1	-0.44574783	-0.493956681	-0.502514981	-0.444711679	2.257416655	-0.502514981	-0.50042627	-0.49252054	1.124976308	1
SLIRP	-0.052874779	-0.802017419	-0.615834636	-0.356190192	1.919386435	-0.778165433	-0.553491658	-0.241834266	1.481021948	1
SLIT3	-0.422923061	-0.429859642	-0.424932693	-0.429859642	2.553376914	-0.429859642	-0.429859642	-0.429859642	0.443777049	1
SLITRK2	-0.440273356	-0.440273356	-0.440273356	-0.440273356	0.541059955	-0.422461043	-0.440273356	-0.440273356	2.523041225	1
SLU7	-1.080990327	0.769767669	0.714801127	-1.072759879	1.421121219	0.364794474	-0.207726729	-1.446523169	0.537515616	1
SMCO4	-0.5664362	-0.432244223	-0.562927552	-0.592148837	1.615317075	-0.307483145	-0.542195807	-0.502514747	1.890633436	1
SMG1P7	-0.611331326	0.703519169	-1.251099666	-0.587325216	1.889713903	0.900993777	-0.007088072	-0.906114531	-0.131268039	1
SMIM3	-0.0914659	-0.704435217	-1.117169881	-0.464548738	1.626096404	1.342107714	-1.180162734	0.393538644	0.196039709	1
SMIM4	-0.174911985	-0.135005537	-1.179385715	-0.300992878	1.880711758	-0.064625421	-1.143075778	-0.147612496	1.264898052	1
SMO	-0.540350521	-0.716290262	-0.681110509	0.107347304	2.041489496	-0.791919038	-0.702959499	0.091221859	1.19257117	1
SMPD1	1.021254547	-0.123666782	-1.926032803	0.586686407	1.379623823	0.204989964	-0.913889658	-0.315918464	0.086952966	1
SMPDL3A	-0.812322846	0.44268839	-1.11200599	0.171915929	1.785426067	0.341539281	-1.263387073	-0.439490356	0.885636598	1
SMYD5	0.431073222	-0.169000461	-0.30627039	-0.605728807	1.48846042	-0.107447347	-1.699095247	-0.449377029	1.417385641	1
SNAI2	-0.242800295	-0.483661833	-0.483661833	-0.483661833	2.464765098	-0.483661833	-0.483661833	-0.483661833	0.680006192	1
SNAP25	-0.217056325	-0.583849836	-0.583849836	-0.309958292	2.050272682	-0.583849836	-0.583849836	-0.583849836	1.395991112	1
SNCB	-0.077787189	-0.550663476	-0.550663476	-0.550663476	2.536567827	-0.550663476	-0.550663476	0.136188068	0.158348673	1
SNHG14	-0.375280068	-0.469831608	-0.468184627	-0.461681028	2.456397055	-0.467244528	-0.466865883	-0.466943343	0.71963403	1
SNHG15	-0.080234959	-0.526658909	-0.557016397	-0.26764676	1.418271388	-0.681991321	-0.804289681	-0.49248333	1.992049969	1
SNHG26	0.186003398	-0.779814313	-0.63957085	-0.47857623	0.984731785	-0.785572245	-0.601318674	-0.069008948	2.183126077	1
SNHG8	0.075520784	-0.445809544	-0.913403795	-0.345279582	0.950049455	-0.199122036	-1.132275624	-0.134366132	2.144686476	1
SNORD116-13	-0.464617064	-0.464617064	-0.464617064	-0.464617064	2.400797057	-0.464617064	-0.464617064	-0.464617064	0.851522389	1
SNORD116-18	-0.356701834	-0.457419755	-0.457419755	-0.457419755	2.501552592	-0.457419755	-0.457419755	-0.457419755	0.599667771	1
SNX7	-0.816849703	-0.99485343	0.06678287	-0.174636135	2.09887637	-1.015647606	0.689220149	-0.365421591	0.512529077	1
SOCS2	-1.290225195	-0.159100058	-0.226269546	-0.92090398	1.9845976	-0.109732077	0.064934417	-0.459125071	1.115823909	1
SORBS1	-0.644327708	1.422140995	-0.197730826	-1.031466769	1.571985213	-0.135040781	-0.666419896	-1.018325428	0.6991852	1
SOX2-OT	-0.440830472	-0.382817047	-0.465979221	-0.467695556	2.495916987	-0.421483621	-0.46799114	-0.465667941	0.61654801	1
SOX5	-0.439617307	-0.439617307	-0.439617307	-0.439617307	2.516465167	-0.439617307	-0.439617307	-0.439617307	0.560855981	1
SP4	-0.634706785	0.365675153	-0.934822282	-0.200202104	1.676456123	0.255134852	-1.217196547	-0.643721804	1.333383395	1
SPARC	-0.771985336	0.122500723	0.490792073	-0.912610918	1.959138009	-0.607974614	-0.030215391	-1.143489939	0.893845394	1
SPATA6	-0.524764651	-0.704354068	-0.704354068	-0.145592562	2.373384249	-0.704354068	-0.311846088	0.026034776	0.695846479	1
SPIB	-0.180726763	-0.449339228	-0.519583164	-0.379010727	2.522282499	-0.519583164	-0.451009135	-0.519583164	0.496552846	1
SPINT1-AS1	0.063258957	1.172983758	-1.174753461	-0.496355554	1.894508244	0.16673991	-1.10333445	-0.36780868	-0.155238724	1
SPIRE1	-1.240955738	-0.178252935	-1.126496607	-0.177296642	1.421459207	1.005780241	1.000346906	-1.002973524	0.298389093	1
SPSB2	-0.58688885	-0.238276108	-0.688512964	-0.488268776	1.865604371	-0.258172524	-0.678529841	-0.536576335	1.609621026	1
SPSB4	0.127524819	-0.814115085	-0.814115085	-0.228165043	1.875465462	-0.814115085	-0.623556359	-0.130250339	1.421326717	1
SRGAP3	-0.593853868	1.30559058	-0.069243811	-0.537699196	0.7881507	-0.476164794	-1.191994605	-0.853281493	1.628496487	1
SRPX	-0.202873664	-0.801576635	-0.492074233	-0.499041212	2.433594405	-0.730630467	0.140276261	-0.334724328	0.487049873	1
SSBP2	-0.317276126	-0.748180313	-0.62140354	0.194721964	2.265682329	-0.740513027	-0.691197163	-0.190283234	0.84844911	1
SSU72	-0.046067132	0.005627102	-1.0257463	-0.108368626	2.101421602	-0.364004827	-1.082802548	-0.47414275	0.994083477	1
ST6GAL1	-0.600374893	-0.610526558	-0.334800936	-0.515390068	1.973605031	-0.610035804	-0.217492363	-0.58073556	1.495751151	1
ST7L	0.262140584	0.214301868	0.395262629	-1.255926696	1.703043034	-0.087908421	-0.445352686	-1.562565954	0.777005642	1
ST8SIA2	-0.491348986	-0.491348986	-0.491348986	-0.491348986	1.275227652	-0.491348986	-0.491348986	-0.491348986	2.164215251	1
ST8SIA3	-0.333333333	-0.333333333	-0.333333333	-0.333333333	2.666666667	-0.333333333	-0.333333333	-0.333333333	-0.333333333	1
STK33	0.149432625	-0.832300168	-0.798006223	0.07904016	1.794488376	-0.820261171	-0.65642634	-0.388147349	1.47218009	1
STMN1	-0.3265111	-1.031236619	-0.205447366	-0.094428405	2.159308186	-0.959986753	-0.0715575	-0.459340108	0.989199663	1
STN1	-0.531729556	0.721789023	0.250251201	-0.641272197	0.196959157	0.602899916	-0.559468888	-1.752683547	1.713254891	1
STOM	-0.573650834	-0.449915745	-0.308435558	-0.690158309	0.922294151	-0.230680289	-0.426479104	-0.582267017	2.339292705	1
STX18	0.730234596	-0.680561018	-1.594730366	0.218427632	1.58232356	0.745251772	-0.954598543	-0.492874831	0.446527197	1
SULT1A1	-0.696616691	-0.767098428	0.26387151	-0.702099144	1.192740986	-0.732644634	0.201255556	-0.720278701	1.960869547	1
SUN3	-0.187375365	-0.020980051	-1.107584999	0.504410226	0.43087911	-0.089326838	-1.214008418	-0.461448159	2.145434494	1
SURF1	-1.371653199	1.223236242	-0.400491823	-0.479732591	1.663772504	0.274775558	-0.106326956	-1.127705624	0.324125889	1
SURF2	0.947047329	-0.249027357	-1.180971809	-0.34694837	1.709595857	-0.241867879	-1.101464636	-0.550516906	1.014153772	1
SUSD2	-0.286856744	-0.444922398	-0.541936355	-0.501100351	2.361346247	-0.487591692	-0.5617998	-0.453594901	0.916455993	1
SUSD3	-0.169476078	-0.483447574	-0.552751816	-0.139164573	2.44446047	-0.600111726	-0.715120893	-0.413006579	0.628618767	1
SUSD5	-0.491556094	-0.483923592	-0.496686964	-0.458373801	2.317104782	-0.496686964	-0.434387219	-0.474329237	1.01883909	1
SV2C	-0.516018279	-0.474367844	-0.516018279	-0.307640745	2.271431161	-0.516018279	-0.516018279	-0.516018279	1.090668822	1
SVEP1	-0.614027826	-0.009867318	-0.559989738	-0.622818199	2.444112162	-0.129502568	-0.589737141	-0.497502856	0.579333483	1
SWSAP1	-0.317969526	-0.971781337	-0.045431887	-0.034778265	1.601358079	-1.136484703	-0.266932652	-0.495019185	1.667039477	1
SYK	-0.963318142	-0.893259293	-0.558194436	-0.159587851	1.953861787	-0.534012536	-0.147244996	-0.043869225	1.345624692	1
SYN3	0.423313004	-0.283817947	-0.954215073	-0.196315361	1.899074669	-0.39381496	-0.862320042	-0.869106799	1.237202508	1
SYNGR2	-0.104381937	0.08640468	-1.124838476	0.269957115	1.945577494	-0.196901147	-1.304932579	-0.501172812	0.930287662	1
SYNGR3	-0.840684823	-0.410834334	-0.467933905	-0.515078011	2.069583872	-0.652515614	-0.659988305	0.289155108	1.188296012	1
SYNPO2	-0.578557433	-0.609602294	-0.310752655	-0.098656609	2.488552503	-0.507116633	-0.560969253	-0.362517562	0.539619935	1
SYNPR-AS1	-0.477332148	-0.477332148	-0.477332148	-0.477332148	0.185310459	-0.477332148	-0.477332148	0.112370481	2.566311951	1
SYT6	-0.452974616	-0.452974616	-0.452974616	-0.452974616	2.506744688	-0.452974616	-0.452974616	-0.375506084	0.586609095	1
SYTL4	0.331550362	-0.581249129	-0.520790031	-0.298475849	0.290038749	-0.572439359	-0.59514041	-0.531983056	2.478488722	1
TAF1	-0.94230697	-0.008990198	-0.741707152	-0.744286233	0.951114439	-0.431029767	0.126460276	-0.388781162	2.179526767	1
TAF12	-1.251140334	1.205427642	-0.16822003	0.04202744	0.202359533	0.105742225	-1.28469295	-0.563609164	1.712105638	1
TAF13	-0.139248942	-0.007080091	-0.894264724	-0.395360862	1.872494445	-0.086365787	-1.156175705	-0.558582211	1.364583876	1
TAF4B	-0.427162762	-0.751759578	-0.616384062	-0.236975141	1.710080018	-0.733127442	-0.475765305	-0.223385625	1.754479896	1
TAF7	-0.020276706	0.632564856	-0.782358892	-0.039667538	1.958736462	0.325060791	-1.304538354	-1.107801544	0.338280927	1
TAGLN2P1	-0.502401315	-1.171183634	0.492845082	-0.480778367	1.358755803	-1.07726298	0.99328468	-0.764169761	1.150910493	1
TAGLN3	-0.440554909	-0.538907754	-0.538907754	-0.294101415	2.350581549	-0.538907754	-0.538907754	-0.396050501	0.935756293	1
TAX1BP1	-1.284877304	0.883751953	-0.089007033	-0.904247069	1.516715531	0.952453789	-0.586868831	-0.975891209	0.487970173	1
TBC1D16	-0.363829042	-0.85492309	-0.712556851	0.331323225	2.153812177	-0.793223674	-0.800112425	0.331816254	0.707693425	1
TBC1D17	-1.034063508	1.191108745	-0.874372635	-0.649762922	1.967318183	-0.023008291	-0.435341412	-0.427867779	0.285989619	1
TBC1D23	-0.535692316	-0.339943261	-0.533074611	-0.499089599	2.126521787	-0.368421626	-0.618147689	-0.545991025	1.31383834	1
TBL1XR1	-1.026142898	-1.0006915	1.017834129	-0.363621627	1.358823109	-0.960927549	0.796747079	-0.734725755	0.91270501	1
TBX22	-0.49817142	-0.49817142	-0.49817142	1.441528005	2.045671935	-0.49817142	-0.49817142	-0.49817142	-0.49817142	1
TCEANC	-1.180516507	0.258402219	-0.719701167	-0.062759072	1.697213357	0.652882176	-0.7508058	-0.982166883	1.087451677	1
TDGF1	-0.488636315	-0.488807222	-0.488807222	-0.488807222	2.198573559	-0.48855153	-0.488599704	-0.488807222	1.222442878	1
TDGF1P3	-0.479110466	-0.479110466	-0.479110466	-0.479110466	1.056695296	-0.479110466	-0.479110466	-0.479110466	2.297077966	1
TDP2	-0.84738223	0.754256344	-0.889387763	-1.19431172	1.136218655	0.772566642	-0.755996426	-0.357447571	1.38148407	1
TDRD12	-0.608242499	-0.547377833	-0.337207174	-0.381396497	1.32690912	-0.528540463	-0.510733409	-0.531794905	2.118383661	1
TDRD3	-1.039332056	-1.166127034	0.673516501	-0.468344552	1.12979043	-0.868607756	0.984657348	-0.51773855	1.272185669	1
TEAD2	-0.665247156	-0.986305696	-0.692890286	-0.467985917	1.764411639	-0.824668879	1.159498495	-0.140174234	0.853362034	1
TEC	-0.431396422	-0.338536978	-0.590130533	-0.535150096	1.879587849	-0.421735908	-0.677516424	-0.508729812	1.623608323	1
TENM4	-0.538209936	-0.393945173	-0.606599496	-0.4789301	2.351394916	-0.350807689	-0.357480798	-0.556931671	0.931509947	1
TERF1	-0.193920937	-0.940695807	-0.759301265	0.131023509	2.013626548	-0.87686366	-0.389918579	-0.196241635	1.212291825	1
TERT	-0.526213257	-0.476298416	-0.469203657	-0.476268372	1.76631652	-0.526213257	-0.526213257	-0.526213257	1.760306953	1
TESMIN	-0.582951424	-0.843380678	-0.347812112	-0.549605889	1.700202156	-0.83987744	0.100330022	-0.316118265	1.67921363	1
TFB2M	-0.216910858	-0.021046773	-0.40856594	-0.682615681	0.994001869	-0.316759675	-1.405214212	-0.006035985	2.063147255	1
TGFB2	-0.306463115	-0.651721321	-0.491570768	-0.651707539	2.419934376	-0.454300709	0.1076632	-0.594405188	0.622571064	1
TGFB3	-0.400754263	-0.516635764	-0.510994007	-0.452073065	2.445144785	-0.490680085	-0.357741001	-0.457828084	0.741561484	1
TGFBR1	-0.376838176	-1.06088896	-0.385877514	-0.147223927	1.604409651	-1.19655569	1.1771531	-0.547338143	0.93315966	1
THAP8	-0.737115425	-0.334911552	-0.3935097	-1.15647875	1.891417195	1.152893147	-0.105340576	-0.823403421	0.506449081	1
THAP9	-0.964970406	0.895831843	-0.209870991	-0.948308314	1.354042401	0.485116865	-0.699766139	-1.130915433	1.218840175	1
THBS1	-0.411714213	-0.489759498	-0.487155197	-0.467269717	2.344705409	-0.489759498	-0.488487502	-0.476064932	0.965505146	1
TIGD7	-0.466692297	-0.302204575	-0.682556347	-0.505143277	2.174633452	-0.060492172	-0.693059579	-0.630409685	1.165924479	1
TMCC1-AS1	-0.420809815	-0.980341546	0.359004032	0.314491953	0.73793608	-0.967216825	-0.223927804	-0.893926309	2.074790234	1
TMEM108	-0.730860262	-0.62543118	-0.494067056	-0.69905216	1.623754343	-0.701404296	0.725604565	-0.617107006	1.518563053	1
TMEM131L	-0.399729837	-0.55968218	-0.543281693	-0.349610052	2.006629325	-0.563205411	-0.562049687	-0.509164866	1.4800944	1
TMEM133	-0.974019298	-0.736002927	1.450630495	-0.824155045	1.272042572	-0.752967354	0.614083785	-0.787250869	0.73763864	1
TMEM143	-0.383988384	-0.76404271	-0.212472891	-0.43530757	1.043193064	-0.673767741	-0.337837612	-0.500198168	2.264422013	1
TMEM159	-0.70981401	0.039215111	-0.601739245	-0.519384457	1.679390809	0.289657325	-0.929233103	-0.809871749	1.561779321	1
TMEM220	-0.76274871	-0.778126517	-0.20136956	-0.696379777	1.670104945	-0.645290403	0.565613439	-0.671792104	1.519988687	1
TMEM37	-0.389070644	-0.545435865	-0.446499968	-0.513743332	1.302092843	-0.52070882	-0.521812802	-0.507562162	2.14274075	1
TMEM41B	-0.832741801	0.219931944	-0.281664125	-0.36702912	0.773612932	-0.297088917	-0.813262422	-0.687284887	2.285526395	1
TMEM74B	-0.989190793	0.051402955	-0.269879967	-0.903827485	2.116783869	0.178735717	-0.023620166	-0.975460947	0.815056817	1
TMPRSS11E	-0.360046015	-0.352557807	-0.350588866	-0.342648954	-0.200213015	-0.366410188	-0.34515965	-0.345611312	2.663235807	1
TNFRSF11B	-0.459021385	-0.459021385	-0.459021385	-0.459021385	2.441689883	-0.459021385	-0.459021385	-0.445917745	0.758356175	1
TNFRSF8	-0.537680903	-0.506722899	-0.521349568	-0.54836925	2.296128507	-0.487628648	-0.219571426	-0.507306488	1.032500675	1
TNK2	-0.656422248	-0.970892111	-0.425455135	-0.494301979	1.654269174	-0.915519955	1.546170181	-0.186212831	0.448364903	1
TNNC2	-0.489825892	-0.515635072	-0.497344409	-0.486036221	1.550841809	-0.507706192	-0.515869434	-0.496711763	1.958287174	1
TNNT1	-0.324013665	-0.832736393	-0.53097255	0.321872525	2.421329794	-0.845764186	-0.454607823	0.097727215	0.147165082	1
TOMM7	0.057563951	-0.848196108	-0.712940412	-0.110422694	1.581868792	-0.799944623	-0.687372109	-0.237203179	1.756646382	1
TOP1MT	-0.244217209	-0.820960009	-0.616469787	-0.139468637	2.022310975	-0.808819003	-0.505016377	-0.233914367	1.346554413	1
TP53	-0.744114918	-1.002808656	0.28184782	-0.604022909	1.438562349	-0.985591604	0.56030901	-0.492926112	1.548745021	1
TPH1	0.078370593	-1.060638881	-0.560578256	-0.386259589	0.438257504	-0.357568419	-0.014577457	-0.543281915	2.40627642	1
TPST2	-0.418216562	-0.718227686	-0.573601051	0.264719345	2.31877322	-0.720164551	-0.751084589	-0.069875129	0.667677002	1
TRAF7	-0.001974665	-1.02971624	-0.493533032	-0.078588957	2.398143368	-0.750985464	-0.467165297	0.02914872	0.394671568	1
TRAPPC11	-1.609264572	0.39955037	0.08776954	-0.370145338	0.422101007	0.004307364	0.388887131	-1.16949359	1.846288088	1
TRAPPC4	0.108445892	0.220502455	-1.130183621	-0.531543378	0.814831834	0.077897475	-1.077241495	-0.544851964	2.062142803	1
TRDN	-1.17681859	-0.63061042	-0.552973859	1.009329403	-0.460055789	0.794205312	-1.17681859	0.736778208	1.456964325	1
TRIM22	-1.096083328	0.032332204	-0.029763266	-1.194191421	1.632174566	0.454262617	0.473337588	-1.194138774	0.922069813	1
TRIM26	-1.038663014	-0.253121061	-0.442332439	-0.831978351	1.81438553	-0.126737287	0.044453479	-0.658051643	1.492044785	1
TRIM2	-0.071534669	-0.638995028	-0.691413591	-0.271940812	1.586446044	-0.599755686	-0.698507103	-0.471205	1.856905848	1
TRIM45	-0.95210527	0.701646903	-0.709669175	-0.789624196	1.528093473	0.583040145	-0.379102378	-1.143348364	1.161068861	1
TRIM52-AS1	-0.636120208	-0.200775538	-0.278097223	-0.94976879	1.079521009	0.868223185	-0.590964687	-1.070193842	1.778176092	1
TRIM54	-0.518756831	-0.374321258	-1.111234429	-0.00519929	0.339289327	1.104760423	-0.751537134	-0.680948353	1.997947545	1
TRIM60	-0.376381264	-0.616810412	-0.491864372	-0.452782234	1.851746785	-0.629740178	-0.500082863	-0.444680833	1.660595371	1
TRIM69	-0.744401325	-0.808364883	0.213284636	-0.459799991	1.663020203	-0.833606708	-0.083428614	-0.594354089	1.64765077	1
TRIM8	-0.531835534	-0.194497817	-0.648939383	-0.615054142	2.007125935	-0.450869033	-0.301274865	-0.701658606	1.437003444	1
TRIML2	-0.727229373	-0.470851723	-0.541760455	-0.500675462	2.002873198	-0.286725218	-0.53427879	-0.410282909	1.468930732	1
TRMO	-0.148938134	0.020879581	-1.464233518	0.303571951	1.21648276	1.249879142	-1.394157549	-0.49676392	0.713279687	1
TRMT61A	0.270530088	-0.504288504	-1.222734311	-0.392801009	1.715926002	-0.714555547	-0.576996941	-0.068570868	1.493491091	1
TRPS1	-0.416780724	-0.492902807	-0.492902807	-0.492902807	0.998014531	-0.460364164	-0.492902807	-0.477107504	2.327849089	1
TSC22D3	-0.961552831	-0.836187854	0.378881151	-0.458685374	1.572012828	-0.881513048	0.491887433	-0.722560837	1.417718531	1
TSHZ1	-0.769950231	-0.78146844	-0.286623951	-0.561185571	1.798413527	-0.586370868	0.70248635	-0.808917609	1.293616793	1
TSHZ2	-0.391353448	-0.564871767	-0.8593241	-0.715549243	1.721740607	-0.916734972	0.849828245	-0.388424396	1.264689073	1
TSPAN11	-0.198462741	-0.710651404	0.380748562	-0.710651404	2.006256888	-0.710651404	-0.555174747	-0.710651404	1.209237653	1
TSPAN18	-0.504044614	-0.521706339	-0.521706339	-0.521706339	1.784428801	-0.508494603	-0.478816111	-0.47039912	1.742444664	1
TSPAN5	-0.500364584	-0.588360202	-1.004630805	0.001550306	2.099538895	1.046969168	-0.91961821	-0.200117763	0.065033196	1
TSPYL5	-0.577287828	-0.438996247	-0.577287828	-0.577287828	1.328182983	-0.577287828	-0.577287828	-0.092794315	2.09004672	1
TSTD2	-0.615610528	-0.118178168	0.041243945	-0.606872204	1.554582993	-0.280433422	-0.928982173	-0.831192364	1.785441921	1
TTYH2	-0.48458582	-0.505631102	-0.452443242	-0.408683804	2.364359874	-0.493643633	-0.476884846	-0.468318583	0.925831156	1
TUBA1A	-0.235162841	-0.752077339	-0.730317424	0.3388677	2.10462608	-0.731522583	-0.755271394	-0.292779779	1.053637581	1
TUBB4A	-0.506546301	-0.507699283	-0.507103686	-0.486436337	1.872495722	-0.507699283	-0.507444744	-0.499173516	1.649607428	1
TUBBP1	-0.004948802	-1.028002477	-0.104725925	-0.574960793	2.110766844	-1.010510119	0.337903062	-0.560372533	0.834850742	1
TUBBP5	-0.308918153	-0.767473435	-0.499851395	-0.3111461	2.2736747	-0.711484428	-0.52135501	-0.152460148	0.999013969	1
TULP2	-0.549056878	-0.30663903	-0.559315639	-0.593791851	1.858369023	-0.397773659	-0.555426917	-0.545867107	1.649502057	1
TWNK	0.180202911	-0.284727407	-0.756407335	-0.762329229	1.781382124	-0.861491048	-0.696458448	-0.122538219	1.522366652	1
TXLNG	-0.3872925	-0.696315748	-0.802667098	-0.049135488	1.651794595	-0.819981634	-0.63214943	0.027741931	1.708005372	1
TXNIP	-0.483854954	-0.509244516	-0.504064776	-0.504886529	1.508317981	-0.496728515	-0.510696013	-0.492050263	1.993207584	1
TYW1	0.510074102	0.884261784	-0.906057713	-0.613564064	1.333901645	0.290326667	-1.52090585	-0.878828686	0.900792114	1
U2AF1L4	-0.770876068	-0.427730736	-0.422030019	-0.835205253	2.036365113	-0.256703392	0.232765886	-0.773770464	1.217184933	1
UACA	-0.299240135	-0.575175048	-0.571632293	-0.374538767	1.162310212	-0.565410343	-0.559950145	-0.438164554	2.221801074	1
UBAC2-AS1	-0.422831599	-0.298760808	-1.124486789	0.490403695	1.22690331	-0.216054144	-1.233398826	-0.187705719	1.76593088	1
UBALD1	-0.88199948	-0.335443337	-0.557194954	-0.672370156	2.339594023	-0.551257766	0.553255041	-0.306300076	0.411716705	1
UGP2	-0.272675827	-1.022010042	0.066619198	-0.233926801	2.159196075	-1.046295155	0.005939031	-0.537722124	0.880875645	1
UGT3A2	-0.395835117	-0.43216663	-0.336208932	-0.415751782	2.606499833	-0.448561741	-0.448561741	-0.352830137	0.223416247	1
UHRF1	0.436311658	-0.698045598	-0.7051763	-0.23882567	2.368731577	-0.73314202	-0.645764764	-0.191498714	0.407409831	1
UIMC1	-0.221780108	-1.011741234	0.572269362	-0.089875515	2.04068502	-1.249258152	0.311905636	-0.770775875	0.418570866	1
ULK1	-1.289024201	-0.731272713	0.676232309	-0.485278459	1.150601119	-1.040931407	1.072368432	-0.496095822	1.143400743	1
ULK2	-0.665445024	-0.996576486	-0.24570185	-0.692545474	1.106737795	-0.893739818	1.721743438	-0.305408032	0.970935452	1
UNC13A	-0.915644981	0.813098251	-1.08323042	-0.390323183	1.208665004	0.5191873	-1.026631761	-0.564462927	1.439342717	1
UNC45B	-0.807376564	-0.228227259	-0.301893008	-1.081925735	1.830770042	0.971821163	0.75156219	-1.081925735	-0.052805095	1
UNC5B	-0.510972605	-0.641312446	-0.701635926	0.025294752	1.300472909	-0.589067758	-0.633922728	-0.320536706	2.071680509	1
UNC93A	-0.568271248	-0.531094134	-0.551052113	-0.484508573	1.162543274	-0.507663449	-0.305083271	-0.441779892	2.226909406	1
UNG	-0.465296142	-0.656353331	-0.178819664	-0.487435236	1.772136179	-0.561329603	-0.653482444	-0.490008367	1.720588609	1
UQCC3	0.610893929	0.837863657	-1.312171851	-0.340986348	1.313550589	-0.200725591	-1.293677619	-0.694280571	1.079533806	1
USP13	-0.493057148	-0.500316296	-0.464981046	-0.439521494	1.038039841	-0.499403376	-0.46637427	-0.481166469	2.306780259	1
USP28	-0.402730079	-0.651527917	-0.527764889	-0.208191423	2.05173564	-0.644392257	-0.59341436	-0.416808409	1.393093694	1
USP2-AS1	-0.082712482	-0.329780713	-0.643319472	-0.329536105	1.396860314	-0.736144013	-0.736144013	-0.546322495	2.00709898	1
USP36	-0.884216094	0.62124061	-1.08458323	-0.941536155	0.462950348	1.25733586	-0.642599181	-0.350200418	1.56160826	1
USP4	-0.94159905	1.504138041	0.031591742	-0.953925032	1.278985795	-0.36251769	0.374048493	-1.359713139	0.42899084	1
VANGL2	0.338460407	-0.819408087	-0.770022121	0.137794302	1.911256868	-0.717350305	-0.700674143	-0.625841038	1.245784117	1
VASH1	-0.813986492	-0.214130108	-0.337276241	-0.750672228	2.026157075	-0.814661964	0.6038162	-0.696825343	0.997579101	1
VASH2	-0.462186266	-0.512520862	-0.473065536	-0.479586057	2.229351839	-0.517767219	-0.461434137	-0.494940409	1.172148646	1
VCAM1	-0.427552682	-0.427552682	-0.427552682	-0.427552682	2.555150397	-0.427552682	-0.427552682	-0.427552682	0.437718378	1
VDR	-0.540279791	0.09121475	-0.807388078	-0.711157259	2.167346749	1.050166862	-0.800608425	-0.222606757	-0.226688053	1
VENTX	-0.500614396	-0.502217287	-0.502217287	-0.500222439	1.956980664	-0.502217287	-0.502217287	-0.499889092	1.552614409	1
VIL1	-0.573386999	-0.642674767	-0.347390334	-0.125290081	2.523801724	-0.124372171	0.366887419	-0.642674767	-0.434900024	1
VILL	-0.862259286	-1.027987304	1.16934341	-0.202972654	1.316293782	-0.862691636	-0.357223025	-0.546548275	1.374044989	1
VPS18	-0.135283772	0.724789325	-1.513752195	0.384096041	1.189238492	0.792618845	-1.622105276	-0.314382668	0.494781209	1
VRTN	-0.516766327	-0.516766327	-0.38944212	-0.516766327	2.555290243	0.019604384	-0.407937607	-0.516766327	0.289550407	1
VSIG10	-0.444822448	-0.657131641	-0.322079472	-0.520508505	2.139776121	-0.645645867	-0.311916313	-0.516689601	1.279017726	1
VSNL1	-0.434239259	-0.473243336	-0.500866667	-0.500866667	2.254040066	-0.500866667	-0.473900023	-0.500866667	1.130809218	1
VSTM4	-0.547704241	-0.547704241	-0.547704241	-0.547704241	2.25284596	-0.547704241	-0.02684907	-0.547704241	1.060228557	1
VTCN1	-0.631954914	0.197621028	-0.475189103	-0.688179907	0.107142385	0.12495565	-0.46061599	-0.660957688	2.48717854	1
VWF	-0.840195359	-0.78028232	0.67655586	-0.713251235	1.716758639	-0.782226552	1.187473218	-0.798768641	0.333936391	1
WARS	-0.353542409	-0.522258383	-0.622130125	-0.39264038	1.772351411	-0.493176738	-0.618812735	-0.511161727	1.741371085	1
WDHD1	-0.381526868	-0.675219244	-0.393975125	-0.344325993	1.943215999	-0.692132671	-0.507563012	-0.488911057	1.540437972	1
WDR24	-0.580988159	0.452581163	-1.197391685	-0.898978552	1.617155066	0.248267949	-1.045853192	0.224182628	1.181024781	1
WDR25	-0.415177046	-0.016652636	-0.884083977	-0.707348351	1.471918865	0.27786337	-0.772015198	-0.734056795	1.779551769	1
WDR35	-0.252545242	-1.058406333	-0.49172625	0.041892068	2.247846311	-1.061921068	0.212951514	-0.193959146	0.555868146	1
WDR66	-0.556470578	0.23959862	-0.793081525	-0.788535246	2.084661683	0.726660978	-0.726263801	-0.787350275	0.600780144	1
WDR73	-0.149338568	-0.06713915	-1.434802095	-0.097039024	1.310579931	-0.256221888	-1.0652902	0.031238189	1.728012806	1
WDR74	0.298057351	-0.604937116	-0.824920563	-0.102498299	1.636826125	-0.900779568	-0.979512365	-0.071139738	1.548904172	1
WIPF3	-0.503569225	-0.508898395	-0.506009017	-0.487860874	1.821299802	-0.507645869	-0.508935417	-0.503181091	1.704800086	1
WLS	-0.555193584	0.244988331	-1.118106356	-0.445586577	1.638028282	1.346684051	-1.27204758	-0.08556668	0.246800111	1
WNT3	-0.484988676	-0.480955589	-0.519178035	-0.530059077	1.822131663	-0.463281733	-0.534586919	-0.512069379	1.702987746	1
XDH	-0.561960287	0.994624499	-0.737999125	-0.653989244	2.091144038	0.2628764	-0.755978453	-0.821905957	0.183188128	1
XPNPEP2	-0.764215728	0.040924537	-0.70674193	-0.764215728	1.811117557	0.32530748	-0.715090745	-0.646684698	1.419599253	1
YPEL2	-0.801345095	-0.355007386	-0.358066356	-0.687637824	1.759280956	-0.525699583	0.140513496	-0.789519117	1.617480908	1
ZADH2	0.313058917	-0.924873015	-0.422144491	-0.696724614	2.203882337	-0.78011379	0.111687074	-0.567881166	0.763108748	1
ZBTB16	-0.41499251	-0.41499251	-0.082910487	-0.41499251	2.637357381	-0.41499251	-0.41499251	-0.41499251	-0.064491837	1
ZBTB18	-0.270907293	-0.473135418	-0.824038357	-0.249464644	1.590230392	-0.817876988	-0.504046215	-0.299995143	1.849233666	1
ZBTB20	-0.818813551	-0.150611582	-0.839037642	-0.280482566	2.016740568	-0.000904528	-0.295296923	-0.88862043	1.257026654	1
ZBTB3	-1.457977036	-0.611809696	0.457469718	-0.487276277	1.45629322	-0.429092362	0.061998865	-0.551702811	1.562096379	1
ZBTB44	-0.432037178	-1.045805589	-0.362860503	-0.09475054	1.117708924	-1.117949286	0.210096151	-0.265677979	1.991276001	1
ZBTB49	-0.95386138	1.612358012	-0.568507496	-0.45977392	0.394726858	-0.397052856	-0.310005274	-0.946119618	1.628235675	1
ZCCHC7	-1.199543608	-0.388793331	-0.053282465	-0.60736928	1.386882319	-0.108102365	-0.074222881	-0.810477332	1.854908943	1
ZCCHC8	-0.825305218	0.76310592	-0.684311843	0.209035196	0.443720082	0.265202629	-1.798924134	-0.02198644	1.649463808	1
ZDHHC23	-0.525308015	-0.569793819	-0.502197276	-0.442929956	2.421405374	-0.560320429	-0.212691903	-0.374971161	0.766807185	1
ZDHHC9	-0.149847006	-0.409149944	-0.942341351	-0.571767131	0.110629355	1.506371986	-0.731196445	-0.646174796	1.833475334	1
ZEB1	-0.453595306	-0.515871871	-0.395178411	-0.536493274	2.142494434	-0.511688762	-0.496230923	-0.536493274	1.303057387	1
ZEB2	-0.433470533	-0.506652592	-0.40269236	-0.506652592	2.519275185	-0.470157027	-0.210457022	-0.506652592	0.517459532	1
ZFAS1	-0.933190613	0.762519737	-0.68534071	-0.617712408	0.894624383	0.602038956	-0.638404982	-1.095245235	1.710710872	1
ZFHX4	-0.417057657	-0.452187523	-0.458654738	-0.400414771	2.554093818	-0.458654738	-0.376579627	-0.428444912	0.437900147	1
ZFHX4-AS1	-0.464617063	-0.464617063	-0.464617063	-0.464617063	2.40079706	-0.464617063	-0.464617063	-0.464617063	0.851522383	1
ZFP30	0.050844707	-0.978344839	-0.258282996	-0.415798331	1.907150975	-1.038618827	0.120102792	-0.663688461	1.27663498	1
ZFP42	-0.471616892	-0.875468371	-0.11516169	-0.256767721	1.353601408	-0.858489614	-0.463708535	-0.323168546	2.010779962	1
ZFP57	-0.507375035	0.47450936	0.049165659	0.099458725	2.143398831	-0.604627476	-1.160599941	-0.980584002	0.486653881	1
ZFP62	-0.668797472	0.785252005	-0.636290265	-0.451790538	2.052948112	-0.411953598	-0.849048157	-0.686620704	0.866300616	1
ZFPM2	-0.462547755	-0.306386097	-0.462547755	-0.462547755	2.508842489	-0.462547755	-0.462547755	-0.462547755	0.57283014	1
ZFR2	-0.684945563	-0.342403731	-0.680348546	-0.53263675	1.980151248	-0.270700956	-0.669332217	-0.267212266	1.467428781	1
ZFYVE9	-0.567814496	-0.82581509	-0.544374376	-0.597248554	1.982988255	-0.704979431	0.645378696	-0.503272474	1.11513747	1
ZGRF1	-0.49396035	-1.012259063	0.075086956	-0.264798736	1.999253571	-1.080579201	0.155421183	-0.487022204	1.108857844	1
ZIC1	-0.78132628	-0.266887627	0.669181155	-0.391154038	1.65783983	-0.848080347	-0.645446029	-0.848080347	1.453953682	1
ZIC4	-0.697853123	-0.585072024	-0.118201379	-0.133608198	0.930116382	-0.358705532	-0.697853123	-0.631999856	2.293176855	1
ZIK1	-0.55286342	-0.041829607	-0.722758543	-0.537364347	1.997162902	-0.262543464	-0.715931097	-0.572327863	1.408455439	1
ZNF100	-0.346174324	-1.0320886	-0.451844252	-0.058408554	1.60277971	-0.967029925	-0.232450623	-0.243891736	1.729108304	1
ZNF101	0.162308675	-0.393625832	-0.753183464	-0.440126605	1.972503757	-0.683699664	-0.701597392	-0.544779765	1.382200291	1
ZNF10	-0.321789698	-0.008831659	-0.709343737	-0.773649081	1.384540237	-0.467289656	-0.189335216	-0.877386823	1.963085633	1
ZNF121	0.643020093	0.259235248	-1.269405487	0.086481858	0.973405288	-0.352301553	-1.64910026	-0.137180429	1.445845243	1
ZNF134	-0.483903674	0.416365866	-0.660407545	-0.735004906	1.718628802	0.107852733	-0.842257744	-0.949502101	1.428228569	1
ZNF136	-0.831438507	0.710706585	-0.55061694	-0.802261139	1.617936103	-0.10507206	-0.674202256	-0.816527334	1.451475549	1
ZNF16	-0.727200658	0.198011285	-0.987063023	-0.640370112	1.5434797	0.231036042	-0.736066051	-0.546568996	1.664741813	1
ZNF17	-0.51702436	0.246038894	-0.528609662	-0.58410437	1.375260512	-0.388428122	-0.950903585	-0.590406184	1.938176878	1
ZNF18	-1.082433357	-0.223311432	-0.066726708	-0.825039797	0.916814549	0.234796216	0.018734499	-1.014448844	2.041614874	1
ZNF202	-0.68312301	-0.753619477	-1.334540393	0.142813948	0.15155163	-0.372806554	1.72554918	-0.272373507	1.396548184	1
ZNF232	-0.582109169	-0.118300057	-0.774440293	-0.564404299	1.629966857	-0.060352677	-0.823083873	-0.48398676	1.776710271	1
ZNF235	-0.123761817	0.300154179	-1.477488777	-0.183231494	1.38566036	-0.58639444	-0.770722287	-0.210314599	1.666098877	1
ZNF25	-0.333859997	-0.649514124	-0.165907316	-0.453747364	2.51029652	-0.753404846	0.107668375	-0.529675227	0.26814398	1
ZNF256	-0.535996384	-0.123001973	-0.553063253	-0.577076711	1.880736898	-0.130365118	-0.7422324	-0.760288726	1.541287668	1
ZNF257	-0.21141836	-0.85532672	-0.556692181	-0.275633556	1.582910052	-0.852792406	-0.402861469	-0.264659508	1.836474148	1
ZNF266	-1.284331234	0.382842432	-1.528105696	0.732648738	1.213190024	0.154870367	-0.383385475	-0.49108934	1.203360185	1
ZNF273	-0.443812314	-0.823932696	-0.394890831	-0.128392715	1.975579425	-0.801199577	-0.42655164	-0.39514065	1.438340997	1
ZNF296	-0.514104432	-0.677410042	-0.420465989	-0.499244816	1.988701405	-0.736750824	-0.138140005	-0.459556566	1.45697127	1
ZNF30	-0.297224478	-0.344645782	-0.784056795	-0.333696039	1.976161079	-0.588810266	-0.657824849	-0.447132568	1.477229699	1
ZNF304	-0.556496766	1.477355124	-0.845405572	-0.678395181	1.214129884	0.205517818	-0.957944295	-0.90118865	1.042427638	1
ZNF318	-0.586073035	-0.816923751	-0.192429265	-0.414970877	1.954593617	-0.96227885	0.773057949	-0.715900179	0.960924389	1
ZNF324	0.131987253	-1.001533119	-0.948598493	-0.495648243	1.4025733	-0.514600831	-0.305633082	-0.136670997	1.868124213	1
ZNF329	-0.549670121	1.443168297	-0.842872117	-0.686976154	0.920977744	0.134503042	-0.821163477	-0.984593718	1.386626504	1
ZNF337-AS1	0.188986662	-0.210130482	-1.23081149	-0.317504603	0.191954146	0.487732031	-1.461103778	0.423256132	1.927621382	1
ZNF345	-1.625244422	0.44467417	-0.052655215	-0.519941324	1.693390922	0.574437853	-0.431194573	-0.907981382	0.82451397	1
ZNF350	-0.834363886	-0.042062391	-0.369775053	-0.966774044	1.760825817	0.00866076	-0.370344623	-0.74672576	1.560559179	1
ZNF35	-0.79855686	0.061002845	-0.831996322	0.444032586	2.280971746	-0.48270037	-0.902634955	-0.195058083	0.424939413	1
ZNF3	-0.536246226	0.637913839	-0.919115516	-0.465108122	1.283945461	-0.196432697	-0.84630424	-0.763629971	1.804977471	1
ZNF354A	-1.42288743	1.143979986	0.573753912	-0.148563482	1.309609586	-0.162437366	-0.933975941	-1.084463236	0.724983971	1
ZNF385B	-0.199347434	-0.618234396	-0.320705212	-0.357575469	2.458365461	-0.618234396	-0.363925186	-0.618234396	0.637891028	1
ZNF391	0.290704742	1.266365001	-1.371895148	-0.020382617	0.979735272	0.229700635	-1.622161491	-0.490244751	0.738178356	1
ZNF397	-0.891446581	0.279707417	-0.200933211	-0.895774177	1.541936227	-0.440301373	0.811014489	-1.333822691	1.129619902	1
ZNF408	-0.787602676	0.074104649	-0.705242475	-0.858756937	1.871210219	-0.204067349	-0.394254698	-0.481624297	1.486233563	1
ZNF416	-0.005270332	0.196461868	-1.268077281	-0.617018933	1.704464526	0.719730777	-0.879982417	-0.864264858	1.013956652	1
ZNF423	-0.56221287	-0.098156801	-0.766180979	-0.76957496	1.535022744	1.888931012	-0.582882119	-0.429521075	-0.215424951	1
ZNF432	-0.595908489	0.429570119	-0.704072237	-0.906633722	1.275698022	-0.022707477	-0.455341703	-0.893739148	1.873134635	1
ZNF441	-0.382535085	0.040969068	0.119556916	-1.413257978	1.031051819	1.155451327	0.215224062	-1.628663502	0.862203372	1
ZNF442	-0.417747158	-0.54528462	-0.645641807	-0.417020143	1.773409825	-0.560078837	-0.556536179	-0.371970792	1.740869712	1
ZNF44	-0.407610214	0.324221834	-1.070877251	-0.364015347	1.751869441	-0.00962118	-1.084258593	-0.527623232	1.387914543	1
ZNF460	-1.238485718	0.016499699	-1.370094077	-0.410995505	0.791832159	0.974115989	-0.37776682	-0.028392605	1.643286878	1
ZNF486	-0.446669581	-0.662324554	-0.558167918	-0.337771309	1.333009538	-0.552143475	-0.443510142	-0.444351772	2.111929213	1
ZNF487	-0.878661447	-0.779331732	-0.292959937	-0.256867502	0.902073552	-0.297396922	-0.20038406	-0.494677448	2.298205496	1
ZNF490	-1.057651324	0.518719661	-0.626440559	-0.446441096	1.993525825	0.558159391	-0.837449745	-0.768257735	0.665835582	1
ZNF503	-0.332302672	-0.346504001	-0.543747571	-0.346385271	2.475974086	-0.464662589	-0.543747571	-0.543747571	0.645123162	1
ZNF525	-0.667626265	0.803896332	-0.872007424	-0.591848857	0.762025931	0.351432998	-0.949241324	-0.744095243	1.907463852	1
ZNF527	-0.087423889	0.421089256	-1.281753569	-0.677519853	1.547474462	0.551023633	-0.833535816	-0.881514349	1.242160127	1
ZNF530	0.161910643	-0.216523031	-1.02256318	-0.18815408	1.824487415	-0.454201793	-1.032459318	-0.488799702	1.416303046	1
ZNF532	-0.110834867	-0.555317979	-0.637694065	-0.258659905	1.598410278	-0.751085553	-0.638078461	-0.498940393	1.852200946	1
ZNF540	-0.079381407	-0.617703577	-0.974435488	-0.617235727	2.255256034	-0.017208111	-0.716047387	-0.057348577	0.824104241	1
ZNF542P	-0.088966104	0.154499543	-1.022885836	-0.406791851	1.93500339	-0.360828539	-0.856834163	-0.661144389	1.307947949	1
ZNF544	0.874601923	-0.099288356	-1.11524574	-0.252648637	0.904017642	-0.24253405	-1.29063102	-0.535761336	1.757489574	1
ZNF548	-0.323953632	1.313054252	-1.073853349	-0.19420203	1.292949096	-0.033506782	-1.358455957	-0.64480067	1.022769071	1
ZNF549	-0.518054487	0.299413456	-0.659941189	-0.638248744	1.795273586	-0.022910264	-0.840297551	-0.869185316	1.453950509	1
ZNF550	-0.800766264	1.813204564	-0.488825384	-0.543256529	0.961186272	-0.021529026	-0.936480298	-0.923300675	0.939767339	1
ZNF551	-0.094299832	-0.679571721	-0.598001169	-0.238547221	1.746168314	-0.753985232	-0.76564137	-0.296346255	1.680224486	1
ZNF552	-0.696414733	-0.541137156	-0.321465168	-0.600329488	1.847654308	-0.526699948	-0.287969387	-0.520777449	1.647139021	1
ZNF561	-0.19528818	0.834560617	-1.001598524	-0.726968128	1.53226474	0.179974689	-0.506391568	-1.301304964	1.184751319	1
ZNF565	-0.738615254	1.140962907	-0.158924931	-1.359201238	1.045547186	0.7367665	-0.547682633	-1.140387181	1.021534644	1
ZNF568	-0.256252503	-0.360678956	-0.992153698	-0.440832204	1.986303349	-0.09770269	-0.978326945	-0.159588592	1.299232239	1
ZNF571	-0.830756281	0.29984391	-0.870789571	-0.732703863	1.136606563	-0.218965337	-0.245863998	-0.583010181	2.045638758	1
ZNF574	-0.728988736	0.376040594	-0.645777584	-0.885395358	2.03617294	-0.171485501	-0.419439429	-0.696689416	1.13556249	1
ZNF577	-1.016600798	0.884394542	-0.464226166	-0.955976923	1.170936383	0.404737733	-0.399795908	-1.094181709	1.470712846	1
ZNF581	-0.713322405	-0.745996743	-0.821385495	0.64268537	1.445474961	-0.249419217	-0.845890786	-0.393019801	1.680874116	1
ZNF582-AS1	-0.538826368	-0.371440978	-0.6380849	-0.498776002	1.592752451	-0.395837789	-0.484366678	-0.577108651	1.911688915	1
ZNF583	-0.518728263	0.31860212	-0.855744687	-0.590421011	1.448409463	0.009207154	-0.973988209	-0.607364383	1.770027816	1
ZNF589	0.294380224	-0.87188842	-0.84373593	0.320180894	1.797807456	-0.840167576	-0.866410139	-0.250133971	1.259967462	1
ZNF608	-0.212945555	-0.831858054	-0.235729059	-0.526862999	2.207398266	-0.853171844	-0.267242541	-0.346224967	1.066636751	1
ZNF610	-0.868490802	0.859514004	-0.837841668	-0.853178248	1.179793402	0.629732294	-0.595099709	-0.943924217	1.429494944	1
ZNF614	-0.635534537	-0.22034555	-0.393455475	-0.711563252	1.870944432	-0.378231904	-0.624865121	-0.515332259	1.608383667	1
ZNF627	-1.421634078	0.624006018	-0.31128427	-0.776351104	0.83609244	0.547277293	-0.432302676	-0.811210081	1.745406457	1
ZNF639	-0.205637356	-0.947182452	-0.456938892	0.072157318	1.594899569	-1.01382608	-0.501433811	-0.261157741	1.719119444	1
ZNF649	-0.544700458	-0.308483621	-0.435230497	-0.538450057	2.311932385	-0.41132278	-0.530030664	-0.555928775	1.012214468	1
ZNF665	0.217808397	-0.983086928	0.486221076	-0.72995855	0.168678981	-0.724604916	-0.006116774	-0.702622875	2.27368159	1
ZNF674	-0.39311066	-0.328131631	-0.703793572	-0.496837934	1.168318681	0.343949954	-0.772545072	-0.860955311	2.043105546	1
ZNF695	-0.345443625	-0.724890447	-0.623045801	-0.182020103	1.676250191	-0.720854953	-0.625854499	-0.231536495	1.777395732	1
ZNF700	-0.767524048	0.456086332	-0.606639138	-1.25162975	0.772234853	0.66168781	-0.407287194	-0.735165991	1.878237125	1
ZNF701	-0.700234674	0.738462246	-0.625148063	-0.906033032	1.42490434	0.214874496	-0.736591107	-0.921595057	1.511360851	1
ZNF7	-0.368492859	0.499761145	-0.61117503	-1.191064755	0.95692074	-0.2471263	-0.424832644	-0.667972501	2.053982204	1
ZNF721	-0.615308817	0.135339017	-0.915540739	-0.438134673	1.674476649	-0.092250259	-0.844578524	-0.558030584	1.654027931	1
ZNF730	-0.328700828	-1.143568185	-0.150610798	-0.211947175	1.766188717	-1.148927646	-0.209243568	0.000849651	1.425959832	1
ZNF732	0.192193944	-0.984997975	-0.374243054	-0.054196946	2.200121833	-1.00470533	-0.737284455	0.094225077	0.668886906	1
ZNF738	-0.237691895	-0.957638315	-0.474923178	0.10206681	1.453733946	-1.012809349	-0.415158658	-0.298707709	1.841128348	1
ZNF75A	-0.362927435	0.981610854	-1.112559123	-0.335047814	1.644358967	-0.188696399	-0.95406766	-0.798452921	1.125781531	1
ZNF765	-0.652687495	0.690910338	-0.890890206	-0.704765056	1.363998189	0.40072292	-1.075945616	-0.62639098	1.495047908	1
ZNF766	-0.985516509	0.33003277	-0.327665764	-0.743875384	1.305413598	-0.10905203	-0.393061871	-0.945615892	1.869341083	1
ZNF770	-0.197618658	-0.331035831	-0.46526715	-0.145759646	1.837585764	-0.703032228	-1.092190362	-0.438187865	1.535505977	1
ZNF773	-1.079172968	0.591655828	-0.502475651	-0.662708479	0.996562369	0.725244592	-0.96199178	-0.768155147	1.661041237	1
ZNF781	-0.222078737	-0.801092061	-0.449303136	-0.017505311	2.484592949	-0.870186805	-0.195665173	-0.224672332	0.295910607	1
ZNF788	-0.471239878	-0.622178797	-0.467526069	-0.504518798	1.931639678	-0.616723639	-0.485009961	-0.332902866	1.56846033	1
ZNF827	-0.655376618	-0.318586407	-0.625012398	-0.511790319	2.040240214	-0.035392401	-0.623662253	-0.634580557	1.364160738	1
ZNF836	-0.760030083	-0.835956098	0.460611359	-1.233775516	1.32823776	-0.688452878	1.377512534	-0.453177224	0.805030146	1
ZNF876P	0.338906326	-0.811297328	-0.740795694	0.013526999	1.289255501	-0.826625117	-0.884355056	-0.246653921	1.868038291	1
ZNF878	-0.279376627	-0.761088597	-0.572977669	-0.175422944	2.155372864	-0.766790341	-0.574515469	-0.199925953	1.174724737	1
ZNF90	-0.373011725	-0.721382832	-0.721838949	0.108555916	1.83051996	-0.786521325	-0.592088379	-0.293845589	1.549612922	1
ZNF93	-0.160010821	-1.166128816	0.101173313	-0.551237292	1.199674672	-1.173866432	0.52510555	-0.495699888	1.720989714	1
ZRSR2	-0.725001529	0.929312736	-1.15418822	-0.787021192	1.69365316	0.390819374	-0.363478908	-0.859732449	0.875637029	1
ZSCAN10	-0.470736807	-0.435355692	-0.440429238	-0.470736807	2.442679297	-0.46009724	-0.470736807	-0.450077655	0.755490948	1
ZSCAN18	-0.403361942	0.077664956	-0.767693772	-0.393350294	1.343212598	-0.563941245	-0.697574271	-0.618700018	2.023743988	1
ZSCAN21	0.347746339	0.520052709	-0.956780535	1.178549784	0.44633261	-0.519943269	-1.754224802	-0.492501903	1.230769067	1
ZSCAN2	-1.220435919	0.325273197	-0.320818666	-0.801855351	1.700856997	0.61259461	0.873379159	-1.271732614	0.102738587	1
ZSCAN4	-0.746991361	-0.135562008	-0.683353478	-0.742220419	0.443582107	-0.036763719	0.27585919	-0.738162873	2.363612562	1
ZSWIM1	1.230663794	1.057298326	-1.301365345	0.136480646	0.84546829	-0.201739098	-1.599668753	-0.487911114	0.320773254	1
A4GALT	0.973754785	-1.091732992	-0.780918265	-0.257210363	0.856170419	-0.995966267	-0.382003923	-0.137095186	1.815001793	2
AAMDC	-0.110763467	-1.108472868	-0.25466066	0.107034308	2.113185547	-1.216644484	0.526568952	-0.50670347	0.450456141	2
ABCC1	0.595953607	-1.668316681	-0.515341488	0.745064376	0.787479054	-1.557933075	0.745273044	0.258420472	0.609400691	2
ABCC2	1.389979992	-0.993883549	-1.058183649	0.264113792	-0.035905401	-0.65015132	-1.067367452	0.994682203	1.156715385	2
ABHD2	0.807672808	-1.345704648	-0.719894864	0.671193514	1.423984871	-1.447173324	-0.24766737	0.336919154	0.520669859	2
ABHD6	0.485755809	-0.925686799	-1.043560585	0.501691634	1.657020257	-0.965862189	-0.752322386	-0.102196459	1.145160716	2
ABI2	0.788974711	-1.409272661	-0.353859299	1.617359692	0.157131825	-1.370679639	-0.461027179	0.551301471	0.480071078	2
ABR	0.292701882	-1.452343674	-0.652680016	1.160743212	1.151998599	-1.447373677	0.598772692	-0.134594126	0.482775107	2
ABRACL	-0.128959118	-1.349410556	0.089102848	-0.102863349	0.316673118	-1.172065507	0.800010871	-0.416308748	1.963820442	2
AC004706.3	-0.795123713	-0.795123713	-0.338840125	2.003058039	1.301853896	-0.795123713	-0.405121224	0.13795334	-0.313532786	2
AC007608.4	-0.33685541	-0.828643617	-0.362897164	-0.420613161	0.241589766	-0.828643617	-0.430552857	0.599998527	2.366617534	2
AC007996.1	0.651840437	-1.215361728	-0.931830055	0.911183845	1.67731726	-1.187246582	-0.271528718	0.048797539	0.316828001	2
AC009121.2	1.136816409	-1.865864242	0.266895123	-0.620221155	1.401364467	-0.368440596	-0.650565257	0.314828642	0.385186609	2
AC009533.1	0.818417187	-1.545194791	-0.165342134	0.015306502	0.185796973	-1.658576058	0.345176682	1.030589436	0.973826203	2
AC010615.2	0.45117092	-1.118442789	-0.438310221	0.319979962	1.385493063	-1.294323024	-0.544737801	-0.272506449	1.511676337	2
AC010761.1	1.597329294	-1.24344879	-0.382652339	0.24706952	0.16606059	-1.562906747	-0.303675264	0.610838724	0.871385012	2
AC011447.7	0.64139454	-0.991792686	-0.579603725	0.070386737	1.820341011	-1.021012369	-0.734327162	-0.328301909	1.122915563	2
AC012360.3	0.813305955	-1.181728315	-0.148531551	0.63422769	-0.358176365	-1.533132428	-0.555686392	1.07438531	1.255336097	2
AC022140.1	1.623173065	-0.210925898	-0.818244246	0.39712359	1.57262002	-0.818244246	-0.818244246	-0.109013793	-0.818244246	2
AC023908.3	0.689665095	-1.220476438	-1.028193943	1.149152009	0.755241831	-0.742657253	-1.087557018	0.388857909	1.095967808	2
AC026401.3	0.460303098	-1.411118555	-0.215902767	0.272113188	0.037976722	-1.521510383	0.669654696	0.002222749	1.706261252	2
AC027307.3	0.126031651	-0.967857353	-0.411365734	0.057475243	2.025169912	-1.189764529	-0.58497799	-0.060743584	1.006032384	2
AC061992.1	-0.288827207	0.152609794	1.115820671	0.717359593	1.594740564	-1.42233834	-1.000271319	-0.12699198	-0.742101776	2
AC079140.5	0.047356817	-0.759154335	-0.701869049	-0.257290258	0.030656847	-0.578162729	-0.46537119	0.178009935	2.505823961	2
AC084816.1	-0.35795784	-1.310181321	1.395219395	-0.125109616	0.243996034	-1.310181321	-0.153978215	0.072920865	1.545272019	2
AC093484.5	1.10424757	-1.256233619	-0.492670672	0.146991863	1.314316663	-1.238114588	-0.716902866	0.06127561	1.07709004	2
AC097534.2	-0.098859638	-1.316879292	0.384925575	1.901942415	-0.14041393	-1.392298143	-0.259217524	0.316938906	0.603861631	2
AC107871.1	0.661841367	-1.412584386	-0.686018012	0.239230511	0.074492762	-1.219213416	0.195640967	0.297274883	1.849335323	2
AC116351.1	0.555554439	-0.957313438	-0.945385591	1.281891196	0.316931017	-1.0075843	-0.932000807	0.200098725	1.487808757	2
AC145207.5	0.782105762	-1.35827802	-0.125814271	-0.622787222	0.800580473	-1.300074863	0.058293785	0.093733218	1.672241137	2
AC234772.2	1.700541719	-0.938292094	-0.467204876	-0.057714947	-0.867277434	-1.0116257	0.420179392	-0.198050641	1.419444581	2
ACAT1	1.346596361	-1.572245546	-0.204898025	0.756777634	0.357762442	-1.429345381	-0.400871905	0.809111063	0.337113356	2
ACD	0.457537558	-1.265934589	-0.431786294	0.413028507	1.736080808	-1.372727978	-0.451878473	0.064617094	0.851063367	2
ACSF3	0.809614687	-0.801704467	-1.067585167	0.613698748	1.474522877	-0.826809072	-1.244065801	0.177161876	0.865166319	2
ACTA1	1.801990865	-0.665381464	-0.57266094	-0.388885183	1.620065021	-0.647580176	-0.635941771	-0.610529104	0.098922754	2
ACTL6A	0.40544545	-1.602946924	0.844194101	0.566185481	0.739980139	-1.692920511	-0.274623428	0.168828852	0.84585684	2
ADCK5	0.335314673	-1.792285907	0.46754971	0.504413878	0.880712396	-1.659111511	0.607993587	0.116171177	0.539241997	2
ADD3	0.653254786	-1.344208485	-0.078602484	0.390139	1.843436101	-1.353578195	-0.395236998	-0.158249173	0.443045449	2
ADGRA2	0.833855471	-1.187182472	-0.921346701	1.234904761	0.889744737	-1.075195498	-0.869074911	0.878576572	0.215718041	2
ADH5	0.364521204	-1.630020577	1.543326109	0.183459193	0.26280961	-1.377826625	0.309765847	-0.407697651	0.751662891	2
ADSL	1.289735387	-1.473372855	-0.398030459	0.668267056	0.90741762	-1.388016099	-0.542740721	0.271593432	0.665146639	2
AFMID	0.611526611	-0.769251898	-1.171069092	0.109737777	-0.232201152	0.064646153	-1.182415844	0.615676377	1.953351068	2
AKAP6	1.18719264	-0.62152515	-0.554295369	0.60927813	0.02271489	-1.094516772	-1.094516772	-0.21073624	1.756404643	2
AKT2	0.900999382	-1.4641485	-0.646316296	0.321611689	1.069054882	-1.543742276	0.125816258	0.947541693	0.289183168	2
AL035425.3	-0.578353611	-0.777817925	-0.777817925	-0.033099354	1.175523205	-0.777817925	-0.777817925	1.829674552	0.717526908	2
AL133215.2	1.623332588	-1.588246049	0.353645259	0.467070153	0.356987143	-1.514823433	-0.075380279	0.186122641	0.191291977	2
AL353692.1	0.545515687	-0.742300831	-0.55294891	-0.017339656	0.400462104	-0.668837029	-0.809834295	-0.47006632	2.31534925	2
AL390728.4	0.121221502	-1.239004033	-0.359795118	0.421556437	1.374808245	-1.186175176	-0.764411402	0.133919909	1.497879636	2
AL390728.6	0.230671637	-1.170338189	-0.522107861	0.210513112	1.339752023	-1.125377621	-0.649363496	0.019904902	1.666345493	2
AL590094.1	-0.581415559	-0.805771589	-0.794599153	0.860798758	1.688131752	-0.805206016	-0.966268788	0.368674174	1.035656421	2
ALDH18A1	0.289534216	-1.692638401	1.005888288	0.788849054	0.211278935	-1.579233332	-0.219336552	0.357488409	0.838169382	2
ALDH7A1	0.369350557	-1.570776968	0.122804152	0.531114767	1.274898989	-1.531077745	-0.338823365	0.145787857	0.996721756	2
ALYREF	-0.020689698	-1.281353037	-1.004073442	0.032359217	1.053884891	-1.253092457	0.515942311	0.485349258	1.471672958	2
ANAPC4	0.2431105	-1.236417104	-0.370880135	0.20070966	1.819653728	-1.137415344	-0.428254082	-0.263755568	1.173248344	2
ANGPT1	1.878077474	-1.39684326	0.042984605	0.386111411	0.914731738	-0.998510158	0.176137133	-0.541659955	-0.461028987	2
ANKEF1	1.653022877	-1.216277141	-0.447639059	-0.566138196	-0.274229798	-1.138793754	0.244274581	1.267664911	0.478115577	2
ANKLE1	-0.123640038	-1.129594766	-0.485166705	1.49642107	1.085423793	-1.03831559	-0.857143961	-0.061255543	1.113271741	2
ANKRD36	1.405743106	-1.466170935	-0.310142818	0.863502906	0.559131056	-1.533508433	0.595169676	0.004105092	-0.117829649	2
ANKRD54	0.918749146	-0.854290601	-1.231371359	0.745851232	0.885480536	-1.116053069	-0.988769669	0.839438745	0.800965037	2
ANP32E	0.018173016	-1.230870379	-0.066406764	-0.055697063	0.20164516	-1.150431816	-0.410832527	0.536584576	2.157835797	2
AP001469.3	0.870922078	-1.390367716	-0.258679824	0.71763067	1.417420548	-1.604070714	0.327631535	-0.170162468	0.089675891	2
AP1M2	0.2869934	-1.056992278	-0.652450973	1.030503673	0.830609209	-1.073419761	-1.083147383	0.217927543	1.499976571	2
AP1S1	0.807114058	-1.163449285	-1.017156448	0.848447909	0.139666192	-0.867451478	-0.962426405	0.897199712	1.318055745	2
APBB1	1.419661773	-0.887389514	-0.981201856	0.717514049	1.245274358	-0.977007144	-1.040839882	0.207745371	0.296242845	2
APEX1	-0.013510084	-1.358733549	-0.413511025	0.475056716	1.527168285	-1.194955814	-0.413582571	0.041491914	1.350576128	2
APRT	1.022682005	-1.517055266	-0.477246215	0.338099158	0.427567191	-1.224540443	-0.520145695	0.498230265	1.452409001	2
ARF5	0.963851316	-1.383086967	-0.216523841	1.241478992	0.935229278	-1.384729028	-0.330651892	0.658721178	-0.484289037	2
ARFGEF1	-0.415850098	-1.132440462	-0.868025955	-0.033385991	1.318952556	-1.177832765	0.858550613	0.063679512	1.386352592	2
ARGLU1	0.628634206	-1.477905232	-0.553310492	1.092018091	0.471725273	-1.508869699	0.037541438	1.185681582	0.12448483	2
ARHGAP11A	1.039108826	-1.67505366	0.08711987	0.72503985	0.577707588	-1.65310065	-0.034645574	0.66372892	0.270094829	2
ARHGAP19	0.323633934	-1.48185001	0.117961302	1.164425317	1.064649049	-1.528017085	-0.524709274	0.105779079	0.758127689	2
ARHGAP35	0.312425786	-0.852996747	-0.999919039	1.542836444	1.091892304	-1.038303372	-0.932976007	0.071602586	0.805438046	2
ARHGAP4	-0.560363966	-0.766023061	-0.219474477	0.646582117	2.068711773	-1.128377114	0.794269855	-0.193596206	-0.641728922	2
ARHGEF10	0.34757996	-1.095039904	-0.436474128	0.127970046	2.031332985	-1.153400208	0.185356711	-0.704433772	0.697108311	2
ARL2	0.723389476	-1.746426127	0.278964225	0.381909465	1.053241682	-1.663746598	0.245595904	0.340923896	0.386148077	2
ARL6IP1	1.465719624	-1.368479692	-0.110549263	1.136988789	0.481634278	-1.333479319	-0.741440556	0.278546296	0.191059843	2
ARMC6	0.705036172	-1.106601402	-0.647388711	0.161300759	1.97268988	-1.164299467	-0.583805647	0.218685306	0.444383109	2
ASAP2	0.859447815	-0.775931014	-1.247505331	0.63965731	-0.425817958	-0.417264582	-1.073374296	0.898242452	1.542545605	2
ASB1	-0.189581731	-1.317310007	0.093752622	-0.287722178	1.340633814	-1.301735523	0.986006582	-0.511932842	1.187889262	2
ATAD3B	0.322765724	-1.137650093	-1.082415034	-0.199743766	1.609078013	-1.145672144	-0.009149504	0.557859714	1.08492709	2
ATAD5	0.588033176	-1.645750196	0.033627476	0.618572612	0.321882327	-1.78533476	0.495628348	0.483875391	0.889465626	2
ATF2	0.800641355	-1.373148052	0.049704631	1.391547857	0.959035378	-1.366833067	-0.321952471	0.493204186	-0.632199816	2
ATIC	0.769055436	-1.592667311	0.550348923	1.204165417	-0.181906793	-1.582233965	-0.160750188	0.674003716	0.319984766	2
ATP1B1	-0.399303155	-0.817353191	-0.991130405	0.01817862	0.060395308	-0.359970146	-0.796787054	1.535920539	1.750049484	2
ATP2C1	0.734347614	-1.413651173	-0.823892446	0.190534918	1.252640794	-1.452355812	0.871700025	0.092652503	0.548023578	2
ATP5D	0.17031008	-1.551429523	-0.870848377	0.936108591	0.983513163	-1.364089382	0.445486941	0.87088416	0.380064347	2
ATP5G1	0.747584504	-1.197376729	-0.817820148	-0.040978617	1.02318616	-1.121611198	-0.745574002	0.794095416	1.358494614	2
ATP5G3	0.33287598	-1.259682103	-0.613302288	-0.093129058	1.81859606	-1.098271915	-0.495461495	0.415356037	0.993018783	2
ATP5O	0.927865933	-1.520902684	-0.479444648	0.556037955	0.839760142	-1.349503971	-0.614409135	0.683843957	0.956752452	2
ATP7A	0.365935561	-1.581791255	-0.757573622	0.443624098	1.408687884	-1.152079763	-0.272124752	0.690331	0.85499085	2
ATRX	-0.370031441	-1.436999703	-0.350294036	-0.00380703	1.634546881	-1.332194972	0.533145616	0.481153745	0.84448094	2
AUNIP	-0.000568139	-1.509699102	-0.501617634	1.418927924	0.274392044	-0.861253532	-0.794385448	1.158849166	0.815354722	2
AURKA	1.323303269	-1.543997955	0.530029213	0.412529867	0.582288913	-1.623610089	-0.380327948	0.193115243	0.506669488	2
AURKB	0.541258509	-1.645586619	0.315100576	0.627000278	0.67827664	-1.628243226	-0.362657581	0.440510654	1.034340768	2
AXL	2.278457717	-0.781998492	-0.62318625	0.206536696	0.849150537	-0.753665335	-0.427818017	-0.459275337	-0.28820152	2
B4GALT2	1.057908841	-1.48690586	-0.272613163	-0.065767927	0.47265194	-1.666942544	0.560789137	0.317371297	1.083508279	2
B9D2	0.84298835	-1.59193919	-0.435923258	-0.791555693	1.342049126	-1.062009991	0.577951725	0.717441874	0.400997056	2
BAMBI	0.361579142	-0.785057545	-0.704845908	0.16907168	0.359828294	-0.781603453	-0.652479988	-0.304961805	2.338469583	2
BBS7	0.696479738	-1.659133751	-0.465771263	0.859131158	0.571702675	-1.594456603	0.448167191	0.775558467	0.368322387	2
BCAT1	0.933958257	-1.057296567	-0.78403771	1.655915131	0.353239313	-1.049683139	-0.958543837	0.233187448	0.673261104	2
BCOR	0.108232196	-1.624699792	0.242362557	0.356245217	0.887801731	-1.562618583	-0.203236311	0.524418913	1.27149407	2
BDH2	-0.501678669	-1.250694186	1.033016605	-0.118008828	0.889361246	-1.21287489	0.527003294	-0.769886271	1.403761699	2
BIK	0.56134693	-0.880565493	-0.821557537	1.412284386	1.687489418	-0.864537177	-0.719096693	-0.357086669	-0.018277166	2
BIRC5	0.96743307	-1.539370497	0.112468077	0.77963387	0.872400617	-1.527521987	-0.661900337	0.647682148	0.34917504	2
BLOC1S1	0.227463168	-1.686735801	0.603580749	-0.496756989	1.625194335	-1.115641811	0.730287254	-0.126085779	0.238694873	2
BMPR1A	1.757844008	-0.811319591	-1.060348404	0.833340239	0.117865118	-0.810166821	-0.954348697	0.004155763	0.922978386	2
BMS1	0.896413525	-1.681865521	0.240476185	0.263555808	0.306697169	-1.633687215	-0.032545475	0.565470993	1.075484532	2
BNIP3P17	0.939823686	-1.066438947	-0.729669713	0.458797052	1.469032897	-1.059076862	-0.925581764	-0.12792391	1.041037562	2
BOD1L1	-0.253944633	-1.156034615	-0.157025628	-0.276462738	1.46633062	-1.395596925	0.748638404	-0.298922607	1.323018122	2
BOP1	0.826214244	-1.414119655	-0.998714436	0.313114992	1.244688507	-1.38625163	0.246464377	0.522418198	0.646185404	2
BPHL	0.527380327	-1.714929176	0.05575407	0.766748365	1.160668798	-1.47359511	-0.354531376	0.437141753	0.595362348	2
BRCA1	-0.314951779	-1.335844448	0.043937433	0.014862993	1.20521096	-1.407639791	0.395382921	-0.179456914	1.578498624	2
BRIP1	0.133786495	-1.272906774	-0.28120253	0.010157514	1.605788631	-1.399647927	0.485455084	-0.4316711	1.150240607	2
BTG3-AS1	0.44505207	-1.252420153	-0.448627312	1.329593776	-0.328907032	-0.688072187	-1.023409646	0.391295815	1.57549467	2
BUB1	0.341932226	-1.232198375	-0.1042257	0.094194398	1.573949537	-1.245314461	-0.63477189	-0.166922957	1.373357222	2
BUB1B	0.804342074	-1.562569677	0.309214622	0.86507289	0.728559046	-1.564591081	-0.683662409	0.473386964	0.630247571	2
BX890604.1	0.750674763	-1.444986719	-0.288806176	1.267893791	0.201194384	-1.54080186	0.558101675	-0.387299801	0.884029944	2
C11orf71	0.776341103	0.086465573	-1.179773192	0.669534189	0.652674642	-0.656847941	-1.392842021	-0.528204573	1.572652221	2
C11orf84	0.454383034	-1.461052774	-0.801516092	0.91971082	1.384615472	-1.350747123	0.218089727	0.019304469	0.617212466	2
C11orf95	1.370976774	-1.002971443	-1.056891534	0.90248229	1.43135628	-0.585085487	-0.841892455	0.063250721	-0.281225146	2
C12orf4	1.480574348	-1.410713759	0.12692652	0.68218039	0.889976563	-1.189247346	-0.972831891	-0.033930579	0.427065754	2
C16orf59	1.139246036	-1.722665608	-0.155611073	0.83733792	0.319890782	-1.544742917	0.158261516	0.599896282	0.368387062	2
C17orf53	0.432872721	-1.660433952	0.415553741	0.539620527	0.845514056	-1.704932424	-0.118920687	0.330645711	0.920080307	2
C19orf24	-0.473214445	-0.688361633	-1.77563983	1.028340153	1.233302723	-0.516403472	0.765886235	0.772857486	-0.346767218	2
C19orf48	0.141540263	-1.209312173	-0.581203975	0.960358848	1.048431302	-1.179885892	-0.923083352	0.427321473	1.315833506	2
C1orf216	0.030084677	-0.957160391	-1.109092856	0.756525883	0.962289063	-0.866524907	-0.736976773	1.740067811	0.180787493	2
C1QBP	0.98512741	-1.361655846	-0.887107711	0.162740507	0.889545847	-1.237616173	-0.361822673	0.538928919	1.271859721	2
C20orf27	1.340813706	-1.248471059	-0.761755531	0.752149506	1.023190847	-1.223633767	-0.749894693	0.348268765	0.519332227	2
C6orf132	1.92337968	-0.90070137	-0.930945897	0.644747303	0.764795251	-0.846736193	-0.923714158	0.046160313	0.223015072	2
C7orf50	0.486868765	-1.439591166	-0.8045268	0.731087009	0.897759063	-1.352390655	-0.310632238	1.189614945	0.601811077	2
C8orf59	0.753057947	-1.502747839	-0.278967023	1.149277824	0.007265667	-1.395041416	-0.43937089	0.552733839	1.153791891	2
CACYBP	0.079539494	-1.437226535	-0.478181295	0.277066798	-0.046824931	-1.008684944	-0.157155661	1.993096415	0.778370659	2
CAD	0.935251758	-1.423009082	-0.534174936	-0.161840057	1.425248756	-1.384550761	-0.027194027	0.30674965	0.863518699	2
CALB2	0.080197891	-0.584975855	-0.557346942	-0.147236473	-0.269201776	-0.779357678	-0.542156673	0.298894235	2.501183269	2
CAMSAP1	0.404476576	-1.215455042	-0.963821908	0.675380447	0.969143274	-1.307714969	-0.06579944	-0.019335903	1.523126965	2
CAPNS1	0.194084754	-1.293688444	-0.314396658	-0.360678686	1.418139384	-1.329565369	1.085914374	-0.378719502	0.978910147	2
CARD11	-0.475100003	-1.148613495	-1.060183005	-0.466182742	0.842578045	-0.079468972	-0.425306052	1.768122625	1.0441536	2
CARNMT1	0.629302929	-1.649481103	-0.620738513	0.988555156	0.328060518	-1.387713259	0.31428851	0.245175432	1.15255033	2
CASP6	0.831263139	-1.595990955	-0.009770401	0.495664061	0.804139128	-1.534068292	0.095557817	-0.28161383	1.194819333	2
CBR4	0.477738347	-1.470344518	-0.034255192	0.861350563	1.007142214	-1.645551246	-0.219356965	-0.023579006	1.046855802	2
CBS	0.002540809	-1.284291471	-0.09499608	1.624073079	0.977787865	-1.141094343	-1.008235925	0.429255454	0.494960612	2
CBSL	0.58723805	-1.34080164	0.049774377	1.214154109	0.716064284	-1.324305092	-1.003152306	1.051401617	0.0496266	2
CBX1	-0.004726894	-1.232990207	-0.416227291	0.137908049	1.567718866	-1.284102589	-0.292082489	0.079089175	1.44541338	2
CBX3	-0.201313638	-1.655140999	0.585081247	0.67949818	0.677208079	-1.72496377	0.451909695	0.403769497	0.783951709	2
CBY1	0.585406672	-0.792882275	0.396165325	0.596078858	0.24377492	-1.816457052	0.184858202	-0.911202075	1.514257423	2
CC2D2A	0.611138246	-1.566065638	0.047582701	0.152524089	1.343755407	-1.511810041	0.750034222	-0.403316266	0.57615728	2
CCDC138	0.959240047	-1.648927214	0.216895119	0.906570513	0.457617137	-1.639103015	-0.270513621	0.46248868	0.555732354	2
CCDC157	-0.46894398	-1.183480529	0.590202599	0.773017679	0.306208446	-1.728490168	-0.264809353	1.393815318	0.582479987	2
CCDC167	1.566708842	-1.437168267	-0.463165537	0.732239958	0.564733981	-1.351170612	-0.378532915	0.654976645	0.111377906	2
CCDC18	0.507700241	-1.510095412	-0.17629	0.227167367	0.877321117	-1.570788975	0.439237171	-0.17887213	1.384620619	2
CCDC40	1.115731527	-0.848624581	-0.892951145	0.385287786	-0.216357702	-0.682631215	-1.262020643	0.97726637	1.424299604	2
CCDC57	0.860337809	-1.207048253	-0.992607523	0.792770714	0.750899179	-1.682545631	0.307435295	0.670334505	0.500423905	2
CCM2	0.670560877	-1.42361931	-0.888029223	-0.087112737	1.302848271	-1.236046401	0.834416067	-0.068197027	0.895179483	2
CCNA2	0.495169819	-1.357713399	-0.171197448	0.040344478	1.614487294	-1.350491143	-0.499026934	0.141696657	1.086730675	2
CCNB2	1.012945811	-1.598012494	1.265868024	0.284805168	0.362072388	-1.602610519	0.047620622	0.045827569	0.18148343	2
CCNF	0.337182846	-1.185749287	-0.386609205	-0.166119595	1.897288049	-1.144588773	-0.247982884	-0.233632945	1.130211793	2
CCNG1	0.79993002	-1.699972532	0.179558212	0.860095587	0.652835953	-1.316087161	-0.704312606	0.233233808	0.994718719	2
CCP110	0.852475568	-1.252780146	-0.51770212	0.861039827	0.28637068	-1.656563571	-0.402261787	1.043172953	0.786248596	2
CCT5	1.036557958	-1.630138321	0.098498832	0.209006031	1.363607486	-1.33549259	-0.518236148	0.420003536	0.356193215	2
CCT7	0.970183963	-1.615357801	-0.014980519	0.243003151	1.041717304	-1.483693893	-0.357713767	0.26545288	0.951388682	2
CDAN1	0.06652601	-1.304474203	-0.445919867	0.400731288	0.666406914	-1.815900543	1.181396973	0.710489983	0.540743446	2
CDC123	0.41772687	-1.587922756	-0.175366378	0.625355601	0.828379707	-1.39983078	-0.546364865	0.566332035	1.271690567	2
CDC20	1.697546679	-1.416732826	0.075605385	0.525469981	0.787610916	-1.443701928	-0.317445553	0.145299764	-0.053652418	2
CDC25A	0.414648585	-1.079559983	-0.690108723	-0.30442479	1.647684491	-1.17157764	0.161706812	-0.343063653	1.364694903	2
CDC45	0.689923978	-1.590130148	1.131254304	-0.348631318	0.663711509	-1.58491705	-0.050783957	0.393835067	0.695737615	2
CDC6	0.9210757	-1.515298766	0.480492064	0.359997702	0.164942199	-1.645959609	-0.491897632	0.749287457	0.977360885	2
CDCA2	1.049190225	-1.651858904	-0.266412391	0.682774882	0.411660904	-1.612709743	0.157957858	0.411661485	0.817735685	2
CDCA3	1.444560376	-1.487070542	0.118261597	-0.009921492	0.964895002	-1.494239418	-0.378205087	0.305266787	0.536452777	2
CDCA4	-0.079648533	-1.541500373	0.004873463	0.258400477	1.367257536	-1.554226766	0.114603118	0.376228593	1.054012485	2
CDCA5	0.906444353	-1.61627314	0.179378462	0.670834932	0.90615335	-1.620956393	-0.392460361	0.566378152	0.400500644	2
CDCA8	0.871967594	-1.479767752	0.04995066	0.295798172	1.177734382	-1.507133358	-0.496622124	0.062956842	1.025115582	2
CDH3	1.245862375	-1.412198527	-0.474998716	1.206409455	0.916431213	-1.29372649	-0.364968911	0.323115508	-0.145925906	2
CDK1	1.165134154	-1.602331638	0.257207109	0.670087002	0.589332338	-1.579741444	-0.482409264	0.517228731	0.465493013	2
CDK20	-0.150465453	-1.116531263	-0.46637518	1.570261264	1.010432568	-1.100710753	-1.004131117	0.539327833	0.718192101	2
CDKN2AIPNL	0.886134352	-1.3215905	-0.10481452	0.701250831	1.53245008	-1.481009111	-0.519575395	-0.077186761	0.384341025	2
CDKN2C	-0.163520553	-0.971004566	-0.838797477	0.471126983	2.303231679	-0.826297046	-0.26998157	0.128227758	0.167014793	2
CDKN3	2.052369705	-1.13219024	-0.460515403	0.505033211	0.432019991	-1.099000528	-0.73537056	0.281305488	0.156348335	2
CDT1	-0.088953055	-1.477940513	-0.36621861	1.484579494	0.400386745	-1.545908216	0.751049531	0.429907662	0.413096962	2
CELSR1	0.308118279	-1.56622878	-0.741808531	0.928039012	0.487174897	-1.470836123	0.366464744	1.043246359	0.645830144	2
CELSR3	0.040241754	-0.938032671	-0.733996454	0.265961352	2.13715189	-1.117752735	-0.371639954	-0.02585194	0.743918758	2
CENPF	0.773225663	-1.677472396	-0.157969304	0.663068211	0.959007809	-1.666472318	0.477723213	0.334425591	0.294463532	2
CENPH	-0.209737067	-1.216558128	-0.26998797	0.31804713	1.504020479	-1.241718718	-0.199460216	-0.234796597	1.550191088	2
CENPI	0.904860016	-1.65311066	0.030522383	0.121121297	0.591212011	-1.605687786	0.556187267	-0.037945977	1.092841449	2
CENPJ	0.501698646	-1.571273514	0.263282643	0.460610599	0.163248333	-1.583648188	0.449460394	-0.176724291	1.493345377	2
CENPK	1.193835556	-1.753693129	-0.073507222	-0.149131966	0.610979081	-1.460680681	0.463263848	0.401474651	0.767459864	2
CENPM	0.34861448	-1.261229279	-0.268997867	-0.145692771	2.066505048	-1.166611839	-0.391617421	0.217177713	0.601851936	2
CENPN	1.029792105	-1.593676773	-0.045370994	0.844719514	0.707532307	-1.571360226	-0.41382682	0.519596312	0.522594574	2
CENPP	1.152458106	-1.448541513	-0.276085198	0.330191554	0.695250023	-1.621527081	-0.350232524	0.755244467	0.763242166	2
CENPU	1.165191964	-1.576832815	-0.420100128	-0.003179278	0.69124776	-1.450852629	0.129185912	0.341302507	1.124036706	2
CENPW	1.111492518	-1.675944167	0.063466563	0.444516992	0.773474916	-1.634649146	-0.051211802	0.561463049	0.407391076	2
CEP152	0.622778326	-1.480365016	0.378013553	-0.579378523	0.833689179	-1.590098117	0.730860005	-0.00383398	1.088334573	2
CEP170	0.360442865	-1.726662192	0.49738342	0.158434113	1.077869107	-1.313966518	1.162576971	-0.528150263	0.312072498	2
CEP250	0.760964533	-1.500060478	-0.100003698	0.235745558	1.360627915	-1.619406228	0.237593092	-0.12357139	0.748110695	2
CEP70	0.487001929	-1.239379373	-0.219189808	1.56646059	0.546582056	-1.143064663	-1.162616513	0.369721792	0.794483991	2
CERK	0.945557609	-1.007702112	-0.709317297	0.307414436	2.027085226	-0.985719593	-0.603743228	-0.14049169	0.166916648	2
CERS4	0.431088426	-0.911437446	-1.000560308	1.38862655	1.595314406	-0.749067133	-0.959288255	0.160096283	0.045227477	2
CETN3	0.00058512	-1.400295989	0.717046822	-0.124912171	1.559451162	-1.490488985	0.436247779	-0.405567019	0.707933282	2
CFAP36	-0.029465599	-1.65944088	-0.432525767	0.463636678	1.047441627	-1.01571783	0.010968203	-0.032130743	1.647234311	2
CHAC2	1.911020715	-0.990047231	-0.73672067	-0.101423078	0.960166387	-0.61866117	-0.985691271	-0.155758234	0.717114551	2
CHAF1B	0.879338208	-1.514495851	0.180991019	0.093092488	1.066047571	-1.422749736	-0.614786045	0.184023279	1.148539067	2
CHCHD6	1.036205182	-1.503563818	-0.710676062	0.940279951	0.6114483	-1.290936927	-0.462800002	0.503531825	0.876511551	2
CHEK1	0.555520453	-1.712594872	0.434023021	0.251042759	0.931089137	-1.729590618	0.418230575	0.191086936	0.661192608	2
CHN2	1.054472466	-1.559991743	0.535684436	0.971057594	0.578090646	-1.424769633	-0.067574973	-0.696208476	0.609239684	2
CHPT1	0.496531245	-1.469694028	-0.831240262	0.21430276	0.802458268	-1.539210219	0.849916983	0.615108352	0.861826902	2
CISD1	0.465542667	-1.15323704	-0.739011498	0.504552988	1.615432739	-1.035239495	-0.906904783	0.194925844	1.053938578	2
CIT	0.257854464	-1.596226328	-0.115323541	0.403148763	0.854107621	-1.626738301	0.35877809	0.169610719	1.294788514	2
CKAP2	0.684404223	-1.626291066	0.479110274	0.205005127	1.142711409	-1.615686542	-0.211523021	0.146878633	0.795390963	2
CKAP2L	1.350581687	-1.415082375	-0.354245625	1.233738999	0.594062573	-1.376161794	-0.441425962	0.183880046	0.224652452	2
CKB	-0.20578902	-0.891814701	-0.89033198	0.986601601	1.568919595	-0.93254681	-0.890079635	1.120108418	0.134932532	2
CKS1B	-0.369371098	-1.434581222	0.045279581	-0.33192337	0.696273811	-1.353960708	0.686363113	0.407076792	1.654843101	2
CKS2	1.173067794	-1.50537472	-0.255691784	0.811772353	0.464531951	-1.535024943	-0.399064943	0.873962526	0.371821765	2
CLN6	0.973449805	-1.399629435	-0.907911602	-0.023478349	1.173849825	-1.179820793	0.102676563	0.041684924	1.219179063	2
CLSPN	0.91275916	-1.588242841	-0.101014669	0.214733988	1.090785561	-1.65642052	0.309764039	0.07394365	0.743691632	2
CLUAP1	0.350044788	-1.198049752	0.160437154	1.777913361	0.342951826	-1.51424029	-0.705815427	0.529797768	0.256960572	2
CMBL	1.910783217	-1.202901665	-0.283044568	-0.238445396	1.284502895	-0.968707205	-0.061642776	-0.414930607	-0.025613894	2
CMSS1	-0.011981193	-1.32904424	-0.384562211	0.501145164	1.737506215	-1.379415757	-0.280692439	0.276786769	0.870257692	2
CMTM7	0.165718682	-0.939821934	-0.849551868	0.507853837	1.744259437	-0.91288465	-0.809326602	-0.153359596	1.247112694	2
CNDP2	0.980326816	-1.280691165	-0.84932263	1.246515598	0.798236929	-1.112313854	-0.803642028	0.307632376	0.713257958	2
CNTNAP2	-0.100450569	-1.006096227	-0.968142078	1.386107893	1.093320352	-0.943424988	-0.913269925	0.456221972	0.995733572	2
COA4	1.031847718	-0.801398999	-1.100821621	0.692848188	0.314198794	-0.709083245	-1.416734612	0.910311258	1.078832519	2
COA7	0.899254677	-0.441525122	-0.891619716	-0.067871519	0.915969733	-0.480080777	-1.674374546	0.233898114	1.506349156	2
COQ2	-0.165830737	-1.184906353	-0.489546274	0.185303811	1.57881602	-1.279978707	0.455796029	-0.430291789	1.330638	2
COQ8A	-0.717006407	-1.128637361	0.330009166	-0.306839069	1.212080351	-1.49636258	0.185328328	0.502186272	1.4192413	2
CORO1C	0.638249463	-1.793769275	0.457125983	0.971536787	0.545656907	-1.530723367	-0.129719731	0.09653998	0.745103253	2
COX6C	-0.213090165	-1.486023964	-0.443414358	-0.140911792	1.403605791	-1.305055717	0.898464871	0.31012927	0.976296064	2
CRABP2	-0.256187176	-0.981858294	-0.676547752	1.156192492	1.493713504	-0.975594583	-0.550462679	-0.434450652	1.225195139	2
CREB5	-0.897663474	-1.294807491	0.59175366	0.146772357	0.688449615	-1.284096195	-0.258231908	0.770907022	1.536916414	2
CRTAP	-0.442016439	-1.374710392	-0.760593201	0.446582959	0.619753969	-1.088022864	1.510339492	-0.045261106	1.133927583	2
CSPP1	0.029805768	-1.066911606	-0.592767656	0.100392398	1.738752926	-1.184482974	-0.262592236	-0.167884231	1.405687612	2
CSTF2T	0.715448764	-1.61741149	0.628971892	1.058079737	0.434260971	-1.547861829	-0.591229231	0.460871148	0.458870038	2
CTH	-0.5263209	-0.718446929	-0.954555582	0.963140835	0.487859227	-0.136403643	-1.400490855	0.623520216	1.661697631	2
CTSC	0.032947187	-1.139466577	-0.573185555	0.077997323	1.646565416	-1.067581189	-0.658648586	0.262899679	1.418472302	2
CTSV	-0.425110103	-1.300173343	0.468502527	0.647392296	1.313104654	-1.305188797	-0.486678527	-0.241279381	1.329430675	2
CUL4A	-0.139266146	-1.271701836	-0.505616953	-0.125207953	0.867562374	-1.247327153	1.597874208	-0.25566675	1.079350209	2
CYCS	0.685990383	-0.886527775	-0.789581492	-0.214110146	1.657608476	-0.916075568	-1.000485276	0.27556295	1.187618448	2
CYP26A1	-0.316306913	-0.804792255	-0.966542579	0.166391278	0.73151505	-0.966542579	-0.492827423	2.055747379	0.593358043	2
CYP2S1	0.612419582	-0.874422965	-0.83249478	0.33144958	1.792090196	-0.900459743	-0.870777468	-0.336477209	1.078672805	2
DAAM2	0.788285315	-0.667930195	-0.184797604	1.396563882	0.427441112	-1.167594187	-1.411589342	-0.322814505	1.142435522	2
DAB2IP	0.806934675	-1.217613326	-1.111090551	0.735373025	0.241071097	-1.4908056	1.166490505	0.245710605	0.623929571	2
DARS	-0.402054131	-1.354412223	1.224727859	0.027638389	0.441830187	-1.486412346	0.615497828	-0.334752915	1.267937353	2
DAZAP1	0.486161281	-1.322943477	-0.819226088	0.368474149	0.1705984	-1.539366865	1.243997439	0.343539521	1.068765639	2
DBF4	0.801301659	-1.617158193	-0.1197701	0.493274875	1.017505858	-1.500739432	-0.319783918	0.222822774	1.022546475	2
DCTN1	0.525338133	-1.449394225	-0.413917945	0.688381675	1.384410197	-1.326833348	-0.415903591	-0.05285022	1.060769325	2
DCTN3	1.375726128	-1.385311701	-0.845882948	0.641217606	1.101460959	-1.047650992	-0.236849103	0.753534698	-0.356244646	2
DCTPP1	1.333449178	-1.275796752	-0.717119386	0.485351817	1.034187999	-1.264601298	-0.723874345	0.650883527	0.47751926	2
DCUN1D4	0.522369331	-1.542499471	-0.209202508	1.287561314	0.342580559	-1.562121758	-0.066804785	1.020298155	0.207819163	2
DDHD1	0.219150676	-1.476462162	-0.771955596	0.431706971	0.780592169	-1.298193553	1.210360136	-0.188228337	1.093029695	2
DDIAS	0.746530205	-1.403624366	0.429480914	-0.105354135	1.591174597	-1.374938225	-0.274029284	-0.397598506	0.788358801	2
DDX18	0.377442922	-1.404394892	-0.345359729	0.130074605	0.25769216	-1.331081453	-0.078281691	0.476083027	1.917825051	2
DDX39A	0.579174019	-1.30822803	-0.583961865	0.028224439	1.89091158	-1.169306748	-0.405740721	0.353260935	0.61566639	2
DECR1	0.55765474	-1.425230449	-0.239081872	1.157107644	1.112755161	-1.480124995	-0.594636642	0.277415118	0.634141295	2
DEGS1	1.537986281	-1.234055526	-0.451895233	0.825936626	0.520548512	-1.174825319	-0.96982351	0.16810313	0.778025038	2
DFFA	0.564345651	-1.044428427	-0.68506394	0.918374843	1.326293637	-1.070354908	-1.082370579	-0.022788282	1.095992006	2
DHCR24	1.057265049	-1.437742665	0.208189359	0.345258475	1.229702148	-1.486812033	-0.375095219	-0.355027006	0.814261892	2
DHFR	1.543075304	-1.366149886	-0.658558915	-0.037002288	0.83160559	-1.215021871	-0.418726019	0.886308523	0.434469561	2
DHX33	0.420450826	-1.052317122	-0.562735862	-0.026439498	1.324029532	-1.293644039	-0.355565632	-0.135206817	1.681428612	2
DHX9	0.55161362	-1.580226942	-0.427288692	0.126706897	0.743094607	-1.506745427	0.039744987	0.84173683	1.21136412	2
DIMT1	0.638245156	-1.705240648	0.054466461	0.455587107	0.40293315	-1.59907229	-0.045933191	1.158879379	0.640134877	2
DLC1	0.684833163	-0.828105521	-0.942577914	0.80744393	0.368716391	-0.912651041	-0.894752622	-0.156626766	1.87372038	2
DLGAP5	0.70159532	-1.426633577	0.230937781	0.190487713	1.499806387	-1.420513158	-0.596219947	-0.049874388	0.87041387	2
DNA2	0.458909189	-1.452772558	-0.318296351	0.965058059	0.371111671	-1.603372162	-0.202616572	0.497987514	1.283991209	2
DNAJB6	0.254875929	-1.023028634	-0.557163418	0.430820281	2.187738335	-1.097747795	-0.546465405	0.318575508	0.032395199	2
DNAJC18	0.502685993	-1.2839481	0.191557657	1.070024594	1.638375591	-1.378071164	-0.331952001	0.060317853	-0.468990423	2
DNMT3B	1.07347479	-1.136201283	-0.974823875	0.660098515	0.736664618	-1.10397465	-0.945159736	0.635189953	1.054731669	2
DNPEP	0.523582794	-1.375382679	0.067569123	1.528971809	0.804874334	-1.484401924	-0.427765118	0.623930634	-0.261378973	2
DOPEY1	1.165021887	-0.976940078	-1.386058357	0.739555914	0.626336278	-1.067578277	-0.542819575	1.141455518	0.301026691	2
DPCD	0.15385425	-0.810091418	-0.925395364	0.261485435	1.123398697	-0.760786087	-0.983328731	0.047360907	1.893502311	2
DPH6	0.45204896	-1.375172202	-0.074144162	0.147961047	1.367861441	-1.366514821	-0.494326842	-0.033672285	1.375958864	2
DPP3	0.614032489	-1.490087588	-0.019483192	-0.021420312	1.822909326	-1.388149266	0.225017995	-0.055941361	0.313121909	2
DPY19L3	0.219476185	-1.465590248	-0.107756747	0.058782337	1.655095977	-1.440980426	0.692319414	-0.262952878	0.651606385	2
DSCC1	0.465722014	-1.402508003	-0.280984754	0.148381624	1.395250882	-1.391098112	-0.293442149	0.037422642	1.321255856	2
DTD1	0.666307408	-1.152044224	-0.67650909	0.288159582	1.525504498	-1.094358392	-0.763600147	-0.04956547	1.256105834	2
DTL	0.254773053	-1.345521488	0.051880687	-0.053053472	1.424003865	-1.368107153	-0.505613396	0.148049519	1.393588384	2
DTYMK	1.569507751	-1.59967447	0.153716908	-0.031729373	0.822266502	-1.449911549	0.199692895	0.365949823	-0.029818488	2
DUT	0.879487885	-1.337486801	-0.356704995	1.280851156	0.7457549	-1.472652645	-0.579761642	0.777748661	0.062763482	2
DYNC1LI1	0.763640783	-1.659831368	0.087318109	0.341347418	0.730264116	-1.729505742	0.830306724	0.072014233	0.564445725	2
DYNC2H1	0.707251209	-1.147440581	-0.798451994	1.210210913	0.108876772	-1.130959268	-0.889791655	0.729323924	1.21098068	2
DYRK4	0.061954348	-1.370074297	-0.941698238	0.317688176	1.230788435	-0.832062765	-0.259257692	0.105718918	1.686943115	2
DZIP3	1.343309508	-1.269379366	1.133860745	0.634198748	-0.264173863	-1.59702015	-0.203313513	-0.212772434	0.435290325	2
E2F1	0.090135393	-1.533595893	-0.603692068	-0.008986046	0.946974664	-1.396080314	0.991816757	1.144464473	0.368963034	2
E2F5	0.272687161	-0.998201918	-0.934744044	0.767649114	0.605840791	-1.228370988	-0.67886842	1.698072431	0.495935874	2
EARS2	0.44176752	-1.275690612	-0.387942328	-0.053017383	1.598245166	-1.291479752	-0.577078049	0.401785284	1.143410153	2
EBNA1BP2	1.927892677	-1.028029212	-0.754386338	0.352523353	0.199359934	-0.984786852	-0.883823643	0.417685811	0.753564269	2
EBPL	0.610295888	-1.506042734	-0.789373129	0.80398118	0.793542979	-1.478451902	0.272115509	0.220837649	1.07309456	2
ECHDC2	0.631360502	-1.147568594	-1.106469994	0.443689461	1.348842663	-0.955884069	-0.503631878	-0.078005189	1.367667098	2
ECT2	1.124124471	-1.553053725	0.144134458	0.629283186	0.631922137	-1.574564851	-0.563035097	0.443067951	0.71812147	2
EEF1AKMT2	0.600992898	-1.226910418	0.014318013	1.058692904	1.424802333	-1.322478021	-0.790777414	-0.417370664	0.658730369	2
EEF1D	0.147064345	-0.598658365	-1.227603107	1.094351586	0.840533254	0.111546126	-1.626615929	0.014253898	1.245128193	2
EGLN3	-0.198392286	-0.951242186	-0.847048386	1.099050969	0.024281478	-0.941900365	-0.839649382	1.409152009	1.245748148	2
EHD2	1.457931051	-0.839516459	-0.810638403	0.123318891	1.734596689	-0.775055752	-0.799922537	-0.394483773	0.303770292	2
EHHADH	-0.184416253	-1.330882622	1.487999724	0.333159751	0.468382175	-1.410620421	0.595317415	-0.787283557	0.828343789	2
EI24	1.176119276	-1.746945913	-0.517361247	0.264181592	0.380139776	-1.39589525	0.651397927	0.549374061	0.638989779	2
EID2	0.543091161	-0.447614479	-1.458874787	0.400552877	1.419677203	-0.432753752	-1.419889768	0.805013102	0.590798442	2
EIF3B	0.464910918	-1.446431135	-0.907335839	0.507419312	0.186329987	-1.425900227	0.508923632	0.892333858	1.219749494	2
EIF4A3	-0.183867799	-1.167549189	-0.571294303	0.510649167	2.083993557	-1.230772423	0.022212663	0.185932485	0.350695844	2
ELK3	1.85252641	-1.379362776	-0.412587562	0.732337282	0.214000576	-1.179891042	-0.427875985	0.01986582	0.580987277	2
ELOVL6	0.209905282	-1.296129412	1.231999878	1.538097485	0.213163173	-1.435385056	-0.528769618	-0.015441947	0.082560215	2
EMD	0.314920337	-1.259792754	-0.868095451	1.230390375	0.758391192	-1.085348238	-0.851033081	0.978014921	0.782552697	2
EME1	0.736419179	-1.490192414	1.232513149	0.299318561	0.218944542	-1.566682533	-0.131202494	-0.30647236	1.00735437	2
EMG1	0.608422241	-1.520952901	-0.029507505	0.103223888	0.891695467	-1.551715901	-0.283892586	0.426389219	1.356338076	2
ENO1	1.186656147	-1.638334441	0.157438163	0.683419154	0.136226107	-1.448165937	-0.513582215	0.767209618	0.669133403	2
ENPP5	-0.86891162	-1.063919197	0.475784511	2.035225971	0.675111311	-1.003108525	-0.248925511	0.331475571	-0.332732512	2
ENY2	0.244224685	-1.585603293	0.08425388	0.086158021	1.564218162	-1.567369794	0.514927569	0.215904107	0.443286664	2
EPB41L2	0.01377298	-1.169850244	-0.725762408	0.527165182	1.507112417	-1.12944902	-0.595675019	0.199792098	1.372894014	2
EPHB6	0.896703735	-0.811963268	-0.811963268	0.20295199	2.103611872	-0.811963268	-0.811963268	-0.191504679	0.236090152	2
ERCC1	0.282882066	-1.0078261	0.488350231	1.608942875	1.339431055	-1.237019237	-0.497543047	-0.370790033	-0.60642781	2
ERCC2	0.384301552	-1.568598026	-0.418530952	0.6687992	0.563446004	-1.452932659	0.033041522	0.288244857	1.502228502	2
ERCC6L	0.948849242	-1.463827826	-0.017236112	0.150293861	0.613608906	-1.502624935	-0.501000658	0.396720689	1.375216833	2
ERH	0.729098804	-1.506193044	-0.421892216	0.539394815	0.984531289	-1.401447539	-0.547901264	0.513915935	1.110493221	2
ERVH48-1	-0.232200468	-1.317026536	1.770424379	0.389751894	0.862406896	-1.367834632	0.249247016	-0.481886618	0.127118068	2
ESCO2	0.956845139	-1.659992185	0.254163917	0.543429066	0.735203766	-1.60141906	-0.364753552	0.362101345	0.774421564	2
ESPL1	0.776976979	-1.527867535	-0.533482689	0.257184171	1.344736975	-1.523830926	0.395697899	0.186545088	0.62404004	2
ESPN	1.190656567	-1.231158425	-0.762601753	0.046775061	1.276584057	-0.937724115	-0.527495468	-0.317806877	1.262770954	2
ETV1	0.244327274	-0.93166104	0.251218845	0.770440105	-0.563792534	-1.140880594	-0.724999371	0.029025484	2.066321831	2
EXO1	1.103603112	-1.342976584	-0.450117171	-0.115939907	-0.333338892	-1.292237685	-0.008393495	1.274588098	1.164812524	2
EXOC4	-0.096644804	-1.651612417	0.81740134	0.078806976	0.967197433	-1.516366022	0.829927248	-0.215193383	0.786483629	2
EXOSC8	0.298272881	-1.407824345	-0.042885642	0.415526629	0.934575465	-1.463370516	-0.615686242	0.397193016	1.484198753	2
EXPH5	0.769051859	-0.2076504	-1.118620949	0.773574803	1.386878455	-1.005482439	-1.315605264	-0.185503293	0.903357228	2
F2R	0.974988316	-0.855756278	-0.841774013	0.620315894	1.939526286	-0.855756278	-0.843805118	-0.005113654	-0.132625155	2
F2RL1	1.420273452	-0.97708591	-0.879645314	0.570915711	1.230688577	-0.987768691	-0.991952958	-0.056925619	0.671500752	2
FAAH2	-0.803256835	-1.016297992	0.150064579	1.377083298	-0.304187243	-0.832064013	-0.851189037	0.755993835	1.523853407	2
FABP5	0.921296674	-0.846654724	-0.846654724	0.038511519	0.281040231	-0.846654724	-0.846654724	0.097876688	2.047893785	2
FAM13B	1.03227234	-1.032822926	-1.083092678	0.426945576	1.805031338	-0.821682904	0.147204991	0.234812781	-0.708668519	2
FAM160A1	-0.277178488	-1.199056645	-1.153823099	1.34891473	1.28536002	-0.843697714	-0.408053015	0.50996404	0.737570171	2
FAM161A	0.898861758	-1.592843667	0.109918049	1.427228898	0.203277074	-1.51406079	-0.146993869	0.482875568	0.131736978	2
FAM169A	1.944880207	-1.087320627	-0.737725591	0.17037898	0.855998033	-1.138700472	-0.314342681	-0.225167529	0.531999679	2
FAM173B	0.159627932	-1.148669388	-0.481819273	1.094391958	1.553842322	-1.178642896	-0.914150889	0.746621868	0.168798367	2
FAM216A	0.892027091	-1.027436613	-0.532222733	0.157555414	0.929823499	-1.0086539	-0.8007439	-0.389579002	1.779230144	2
FAM222B	-0.220858215	-0.965584193	-1.32532234	0.295161205	1.698034219	-1.005439064	0.088121743	0.36981204	1.066074606	2
FAM35A	-0.00764281	-1.279485087	0.436408312	-0.47219509	0.597507276	-1.161987209	0.500732739	-0.537534822	1.924196691	2
FAM60A	-0.316762131	-1.534523251	0.961948709	0.62900435	0.718783711	-1.497520667	-0.134375516	-0.028967077	1.202411872	2
FAM69B	-0.597888244	-1.230897605	-0.640173767	0.011470341	1.400339787	-0.998202604	1.633582299	0.246737014	0.175032779	2
FAM83D	0.723943699	-1.646688592	-0.359180837	0.552843295	0.555089018	-1.662251742	0.659758813	0.844299026	0.33218732	2
FAM92A	-0.189543274	-1.349841061	-0.090783336	0.277088787	1.731880206	-1.312857493	-0.16994666	-0.037780667	1.141783498	2
FAM98C	0.526253403	-0.847407134	-1.138576155	-0.111388567	0.181911771	-0.885672733	0.451634262	-0.315692054	2.138937206	2
FANCB	0.579090759	-1.712324139	0.155990749	0.57427313	0.081970607	-1.555142071	-0.08971191	0.90244612	1.063406755	2
FANCD2	0.836566	-1.570459017	0.022530553	0.654917105	0.926817531	-1.633989592	-0.402313361	0.452723864	0.713206916	2
FANCG	0.256872892	-1.496416989	0.607184592	-0.093187664	1.306336365	-1.54916025	0.337100733	-0.354474999	0.985745319	2
FANCM	0.885210059	-1.622960333	0.059290933	0.769896181	0.065764226	-1.749939425	0.309321317	0.629980062	0.65343698	2
FARP1	0.228100789	-1.018170744	-0.666465328	-0.182437214	0.964877462	-0.813173035	-0.699759809	0.103465753	2.083562128	2
FARSB	1.690768875	-1.275977298	-0.39831761	0.483983472	-0.193498083	-1.212374478	-0.642949758	0.79528873	0.753076151	2
FBL	0.376520775	-1.218634733	-0.878263798	0.740883542	1.140206451	-1.142140465	-0.699125389	0.317092503	1.363461115	2
FBN3	0.887382432	-0.610377432	-0.841600273	0.442249441	2.038785144	-0.934007871	-0.934007871	0.105321094	-0.153744662	2
FBXO27	-0.489428076	-0.963884464	0.243988542	1.679386686	0.461352781	-1.311016753	-0.982435831	0.428874925	0.933162189	2
FBXO34	0.376150007	-0.515868491	-1.14520987	1.214217751	1.685588124	-0.624501438	-1.165717718	0.404752011	-0.229410376	2
FBXO41	-0.138079525	-1.01971148	-0.806645554	1.783301462	1.307574738	-0.84933728	-0.751268735	0.271246686	0.202919689	2
FBXO5	1.140691832	-1.608829896	0.210417721	0.724923247	0.331788554	-1.613611609	-0.362727108	0.622056774	0.555290486	2
FBXO7	0.499011641	-1.735981834	0.456090101	0.543509437	0.666331289	-1.693211224	0.718447103	-0.086163129	0.631966615	2
FCF1P2	1.253523981	-1.444025585	-1.218456955	0.214021336	1.328001551	-0.373209964	-0.132159229	0.827783144	-0.455478279	2
FEN1	1.409556876	-1.168875471	-0.479962593	0.309452382	0.788780643	-1.331661336	-0.940939945	0.849456258	0.564193186	2
FERMT1	0.305643672	-1.579868538	0.20351096	0.128530326	0.078528158	-1.57110045	0.507824154	0.345518048	1.581413672	2
FES	0.82770039	-1.093482524	-0.499090604	-0.093983957	1.022254211	-1.212580849	0.61574875	-0.981791853	1.415226437	2
FGD1	-0.669979622	-1.139292113	-0.06603962	0.042761143	1.922731032	-1.392170538	0.282923243	0.430085736	0.588980739	2
FGFR2	0.167566965	-1.08240006	-1.164765902	1.268311413	0.993685687	-0.506724443	-1.152312015	0.444377284	1.032261071	2
FIRRE	0.375185442	-1.409211083	-0.248082946	-0.165476297	1.400438201	-1.439552357	1.312964763	0.009646535	0.164087742	2
FKBP3	0.873276505	-1.417956681	-0.528204754	1.05481422	0.727833926	-1.366579608	-0.698520101	0.803113078	0.552223416	2
FKBP5	1.23613852	-1.132423111	-0.728056213	0.955732929	0.877710003	-1.147348995	-1.013818662	0.177485493	0.774580036	2
FLNA	0.615426848	-1.326177709	-0.85792868	0.241918169	1.769341518	-1.279002942	0.471605928	0.261657094	0.103159774	2
FLVCR1	1.315569534	-1.242841286	-0.700840697	0.226721219	1.293853433	-1.331456767	-0.429744947	0.14011355	0.728625962	2
FOXM1	1.451714193	-1.473074808	-0.507565716	0.559019548	0.419912496	-1.515704059	0.500284899	0.649199725	-0.083786278	2
FOXN3	0.018937839	-0.990930015	-0.854555145	0.301124508	1.977693266	-0.920006948	-0.71668159	0.257530421	0.926887664	2
FOXRED1	0.294385869	-1.199659795	-0.54551972	-0.464755694	1.165578178	-1.031371674	-0.425892388	0.425039797	1.782195428	2
FRG1	1.365960621	-1.31530065	-0.16464656	1.07600482	0.737603201	-1.487555622	-0.615952255	0.1754725	0.228413945	2
FUOM	-0.045080401	-0.937350937	-0.279789181	-0.076107008	0.786934635	-0.920495831	-0.670043739	-0.117686803	2.259619266	2
FUS	0.211655566	-1.452961935	-0.261658248	0.05954657	1.587442635	-1.464015925	0.251984768	0.046683772	1.021322798	2
FZD1	-0.71807043	-1.26560018	-0.767597508	0.54531401	1.569356171	-0.642772144	1.438131651	-0.219376596	0.060615024	2
FZD3	-0.209690339	-0.791671636	-0.970449914	0.863244521	1.536036724	-0.865460821	-1.031218364	0.292343387	1.176866443	2
FZD4	0.240302506	-1.157539564	-0.574666811	0.938843459	1.848378539	-1.295133231	-0.309536857	-0.122047877	0.431399836	2
G2E3	0.545042212	-1.554940035	1.01574834	0.316784732	0.825968765	-1.813146862	0.110997611	0.18259024	0.370954997	2
G3BP1	0.198141951	-1.067211868	-0.500641264	-0.012430897	1.97807159	-1.132088136	-0.548157127	0.048060178	1.036255574	2
GABBR1	0.457155465	-0.958447035	-0.784664779	1.465637875	1.387526755	-1.019513448	-0.942316248	-0.101130123	0.495751538	2
GABRG3	1.747451829	-0.649361598	-0.649361598	0.842092669	1.306625092	-0.649361598	-0.649361598	-0.649361598	-0.649361598	2
GADD45GIP1	0.751411061	-1.002657025	-0.88437627	-0.473002326	1.695301886	-1.303374089	0.47560239	-0.048121626	0.789216	2
GALM	-0.453434963	-1.28981039	0.860132253	0.065454317	0.488671655	-1.299417157	0.862317567	-0.717491324	1.483578043	2
GALNT11	1.158829618	-1.39718814	-0.80238597	1.411599968	0.564706986	-1.260343758	-0.167082469	0.167511226	0.324352539	2
GAPDH	0.911599841	-1.899891905	0.333976222	0.892880605	0.008323191	-1.306642296	-0.101561931	0.940237511	0.221078762	2
GARS	-0.544384275	-1.099076215	-0.540611184	0.852104163	1.565139118	-0.935293472	-0.913462595	0.889738719	0.725845741	2
GATB	1.498649214	-1.348664138	0.033362338	0.64866684	0.084353504	-1.410902441	-0.807836983	0.56508682	0.737284846	2
GCC2	0.024795885	-0.120475902	0.246157959	0.641642643	-0.801471952	-0.817245219	0.320333645	-1.474809492	1.981072432	2
GDF11	0.270383966	-1.23621639	-0.789374515	0.855969149	1.534958429	-1.432103184	-0.26501119	0.496491074	0.564902661	2
GEMIN5	0.624404798	-1.183960452	-0.473168007	0.131724595	1.712954321	-1.22785769	-0.522863947	-0.167500661	1.106267044	2
GINS1	0.866314494	-1.554275788	0.184977331	0.686849968	0.696612012	-1.589353625	-0.566926405	0.336909063	0.938892951	2
GINS2	1.245223308	-1.133754507	-0.754182072	0.551430695	1.50328164	-1.046111289	-0.881100954	0.13952293	0.375690249	2
GINS4	0.062870317	-1.410432725	0.389556735	-0.149631942	0.925675146	-1.542649564	0.375605093	-0.204402522	1.553409461	2
GLDC	0.600301912	-1.682927826	-0.407527704	1.073637534	0.69358837	-1.551353334	0.560986422	0.482648887	0.230645739	2
GLO1	1.329841855	-1.679178086	0.237664856	0.765433022	0.067764325	-1.392994268	-0.446366971	0.543703321	0.574131946	2
GLUD1	-0.322432562	-1.249659953	-0.407304469	-0.188864676	1.063456256	-1.059872881	1.540024555	-0.497543169	1.122196899	2
GMNN	1.084814281	-1.633272033	-0.01142845	0.655630831	0.426408864	-1.520047297	-0.441807024	0.748893973	0.690806856	2
GNB4	-0.963565269	-1.290887023	0.151579664	0.692829757	0.311011566	-1.200938894	0.489742788	0.043466696	1.766760715	2
GNL3	0.168605647	-1.112707745	0.179330793	-0.13458156	0.99704707	-1.236510524	-0.770043586	0.020277784	1.888582122	2
GNPTAB	0.08358511	-1.313676389	-0.658245171	0.089428492	1.801941889	-1.211384393	0.747750561	-0.242103459	0.702703358	2
GOLGA8A	0.290729227	-1.363066323	-0.250504778	0.35964633	1.204403095	-1.678870542	-0.268742979	0.668673823	1.037732147	2
GOLM1	-0.549041172	-1.517128883	-0.302104445	0.340996872	1.437507239	-1.300528621	0.87248144	0.232932461	0.784885108	2
GPHA2	-0.634550914	-0.887878654	1.991080106	-0.887878654	0.352532475	-0.887878654	-0.272690469	0.215994985	1.011269779	2
GPI	0.177684386	-1.124799684	-0.495840791	0.135659958	1.698040287	-0.976828117	-0.88857577	0.13542428	1.339235451	2
GPRC5A	2.18314906	-0.619140642	-0.784258766	-0.192048819	1.134310048	-0.271652987	-0.784964162	-0.349765978	-0.315627754	2
GPSM1	-0.8117002	-1.224868549	-0.934242142	0.815432568	1.662566125	-0.882667934	0.749176375	0.277945852	0.348357906	2
GRB10	-0.342927546	-1.417147181	-0.73736724	0.411150434	1.172245268	-1.129131993	1.537115037	0.356638524	0.149424698	2
GRK6	0.940946171	-1.331955718	-1.053075549	1.335461254	0.881536103	-1.170297896	0.191432856	0.451925896	-0.245973116	2
GRSF1	-0.054851277	-1.618278759	0.117369543	0.272839825	0.527004531	-1.596084878	1.144080952	0.142294223	1.06562584	2
GRTP1	0.428489569	-1.324661728	-0.422963139	0.880653108	0.153280151	-0.891661284	-1.204591612	1.159415543	1.222039394	2
GSPT1	0.831405345	-1.567960701	-0.735559024	0.743325173	0.15233278	-1.495720654	0.483026158	0.782641206	0.806509719	2
GSPT2	0.892284872	-0.871624424	-0.884939364	0.133221656	1.35823164	-0.996156779	-1.11901112	0.271311282	1.216682237	2
GTF2H2C	0.375815027	-0.641190659	-0.813643581	0.834197405	1.753302646	-0.963947338	-1.179566639	-0.179203059	0.814236197	2
GTPBP3	1.766299246	-0.992039172	-1.100135952	0.465687662	0.323564647	-1.320790697	-0.210629841	0.583896695	0.484147411	2
GTSE1	1.610563771	-1.508048203	0.136319026	0.701968302	0.408916358	-1.514914272	-0.001684949	0.352166092	-0.185286125	2
H2AFV	0.440645149	-1.60754742	-0.287557916	0.064402119	1.183115529	-1.499670817	0.897081579	-0.015701017	0.825232792	2
H2AFX	0.457639933	-1.358684154	-0.80184035	0.16120584	1.535632301	-1.392868586	0.930564232	0.263605927	0.204744857	2
H2AFZ	1.164477549	-1.584334904	0.065421508	0.4777951	0.366897794	-1.518139919	-0.362879336	1.121498952	0.269263256	2
H2AFZP3	0.581971324	-1.604061584	-0.298588521	0.291052923	1.200017527	-1.402145297	-0.39686919	0.703261625	0.925361192	2
HADH	-0.083954335	-1.288357812	-0.64035865	0.347198534	1.025319523	-1.012729913	-0.671583235	0.626983976	1.697481913	2
HAUS1	0.20841871	-1.751317188	1.075231046	0.459357117	0.292476162	-1.517920347	-0.020944321	0.211945229	1.042753593	2
HAUS6	0.315286599	-1.632544063	0.493060116	0.363168458	0.503615083	-1.758108394	-0.005449419	0.728349507	0.992622112	2
HDAC6	-0.820361539	-1.324465459	0.675849652	0.156676321	0.915403278	-1.005965072	0.87216983	-0.816330755	1.347023745	2
HEATR1	1.004698243	-1.438211785	-0.369377041	0.309328619	0.099324139	-1.619739468	0.085968379	0.655310651	1.272698263	2
HEATR3	1.062900497	-1.55036627	-0.37077278	-0.096020692	0.163802319	-1.511478864	0.972899105	0.365509101	0.963527585	2
HELLS	1.273570343	-1.612359734	-0.089874551	0.69673071	0.425467182	-1.591865867	0.324452398	0.674112898	-0.10023338	2
HGH1	-0.033630586	-1.438369681	-0.530701995	0.354912052	0.948772852	-1.499052863	1.202753508	0.03231903	0.962997684	2
HIST1H3I	0.56574575	-1.262204893	-0.943174924	0.442527458	1.299761461	-1.257716598	-0.24753592	1.286626106	0.115971562	2
HJURP	0.434592455	-1.295349752	0.206472596	-0.171584777	1.673050764	-1.317979152	-0.327610899	-0.342044923	1.140453689	2
HLA-B	-0.822623181	-0.788826135	0.889999267	1.847643121	1.029968021	-0.944666404	-0.217223184	-0.482001925	-0.512269582	2
HLA-DQB1	-0.531730493	-0.803796931	-0.733526115	0.612146315	-0.198267587	-0.803796931	-0.68367079	1.387632443	1.75501009	2
HLA-DRB5	-0.859035994	-0.95587539	-0.867795651	0.485281252	-0.394468998	0.295470148	-0.555788807	0.817657107	2.034556333	2
HMGB1	1.15888377	-1.63871137	0.329474099	0.319822227	0.610835724	-1.669905755	0.238780386	-0.080956672	0.731777592	2
HMGB1P8	1.066355938	-1.529818074	0.680486156	0.148952781	0.747922067	-1.735537336	0.032500819	-0.08701877	0.676156418	2
HMGB2	-0.207077253	-1.428812569	0.488252556	0.307374061	1.012558508	-1.426248887	-0.177538734	-0.140752099	1.572244418	2
HMGN1	-0.292618282	-1.326925992	-0.564808691	0.506552963	0.719356329	-1.559596978	1.209397623	0.261062673	1.047580354	2
HMMR	0.82419608	-1.338061599	0.676882972	0.1664823	1.602539795	-1.355137494	-0.496967656	-0.481386523	0.401452123	2
HNRNPA1	0.168795728	-1.507372294	-0.136328582	0.917855308	0.666004929	-1.436845967	-0.40205339	0.285229299	1.444714969	2
HNRNPA1P48	0.221646279	-1.329610678	-0.622157489	0.851982564	0.358559718	-1.18820625	-0.300090986	0.160192112	1.847684731	2
HNRNPA2B1	0.665388971	-1.592963758	0.19643729	0.805339261	0.552046123	-1.753003436	-0.200190763	0.79446835	0.532477963	2
HNRNPA3	0.792611404	-1.594653003	0.015972269	0.095211508	0.770618922	-1.724257033	0.443436347	0.191442443	1.009617143	2
HNRNPAB	0.118681879	-1.247621316	-0.504627921	-0.306320175	1.794216566	-1.296545414	0.450431623	0.002980607	0.98880415	2
HNRNPM	0.346638371	-1.565514774	-0.540312504	0.395117395	1.169209404	-1.544626261	0.246075884	0.908470406	0.584942079	2
HOXB4	1.204690936	-1.620626236	-0.234648287	0.641709236	-0.24110141	-1.327028215	0.020752609	0.317193917	1.239057449	2
HPDL	1.160453127	-1.010805735	-0.994746273	0.6949353	1.249211932	-0.95531384	-0.951565805	0.880485118	-0.072653823	2
HPF1	0.302419398	-1.622002898	-0.265448166	1.020372726	0.750169189	-1.423604382	-0.265236004	0.317918747	1.18541139	2
HPRT1	0.136888496	-0.985589211	-0.75555389	0.333454619	0.914709045	-0.90164325	-0.704009508	-0.081747563	2.043491264	2
HSD17B10	1.071412565	-1.610318921	-0.425850087	0.436660162	0.713742893	-1.269935103	-0.594645703	0.809885971	0.869048224	2
HSD17B11	0.837297009	-1.631881069	0.844725885	0.8302359	-0.00033511	-1.572489691	-0.118147636	-0.051774699	0.862369411	2
HSPA14	0.288990563	-1.462084639	-0.060185833	0.113364956	1.251081824	-1.41956058	-0.427819098	0.345154816	1.371057992	2
HSPE1	0.421425763	-1.466868034	-0.439336377	-0.118649793	1.582959849	-1.196890673	-0.336112785	0.456044899	1.09742715	2
HUWE1	-0.048275514	-1.308847824	-0.686916475	0.017390561	1.061632475	-1.255967205	0.782840496	-0.13560523	1.573748716	2
HYLS1	-0.100819427	-1.301174863	0.456341176	0.19308608	1.670217696	-1.36813634	-0.243997225	-0.390707675	1.085190577	2
ICE1	0.439350889	-1.489045859	-0.546824091	0.764433017	0.912055023	-1.681504645	0.815749035	0.202027182	0.583759449	2
IFT22	0.356404746	-0.970476122	-0.894959953	0.752063386	1.702986679	-0.966187574	-0.926919086	0.013516633	0.93357129	2
IFT43	0.390691701	-0.353494704	-1.394159971	0.789172793	0.742947121	-0.413427065	-1.412828666	0.092785808	1.558312984	2
IFT52	-0.020498638	-1.211525116	-0.205065476	0.438528279	1.469965319	-1.254884424	-0.455355057	-0.271422046	1.510257159	2
IFT57	0.209652678	-1.293132791	-0.890317434	1.766309199	0.251457638	-0.94212625	-0.576811371	0.733607419	0.741360912	2
IFT74	-0.2150024	-1.783538058	0.497375268	0.429977494	0.82149161	-1.450194892	0.297736339	0.205636239	1.1965184	2
IFT80	0.993460067	-1.595370278	0.40261747	0.877986277	0.380437783	-1.76124449	0.177173656	0.018560213	0.5063793	2
IFT81	0.053268121	-1.183393238	-0.733447521	0.78638471	1.401498227	-1.317356129	-0.561165228	0.44689355	1.107317509	2
IKZF2	-0.802899076	-1.605238826	-0.547695016	0.219428962	0.673685949	-0.896681332	1.396057622	0.809570426	0.753771291	2
IL12RB2	1.367527377	-0.225247659	-0.413851763	0.433569137	-0.246043104	-0.749475034	-0.256515144	-1.540506041	1.630542231	2
IL17RD	0.431070729	-1.046466741	-1.031416756	1.390380696	0.959624299	-1.02498802	-0.635518989	-0.187869788	1.145184572	2
IL6	1.528693451	-0.993599175	-0.947725324	0.68423577	0.261898762	-0.987527494	-1.043269587	0.580810374	0.916483224	2
ILF3	0.582513217	-1.456034833	-0.671966215	0.481130921	1.269988378	-1.498125624	-0.111249263	0.664856149	0.73888727	2
IMPDH2	0.583167766	-1.266085055	-0.542496849	1.066978084	0.44836761	-1.029490947	-0.963423785	0.149689418	1.553293756	2
INCENP	0.618016584	-1.216497285	-0.713154391	0.164606264	1.714598024	-1.503112428	0.151355551	0.583049897	0.201137784	2
INMT	2.241944348	-0.293567688	-0.620998657	0.088803849	-0.055205526	-0.253494069	-1.05693222	-0.834066658	0.783516621	2
IPO5	0.213383359	-1.286417339	-0.458607455	0.587004558	1.068951949	-1.26122174	-0.672766218	0.226127404	1.583545481	2
IQGAP3	1.725848724	-1.408321091	-0.437106135	0.149939858	-0.160144104	-1.342436823	0.092009412	0.556322383	0.823887775	2
IRS1	1.909304313	-0.8375729	-0.900784878	-0.278535913	0.817617628	-0.757968771	-0.817616692	0.92161707	-0.056059857	2
IRS4	-0.558524989	-0.558524989	-0.558524989	2.288611572	0.935040286	-0.558524989	-0.558524989	-0.558524989	0.127498075	2
IRX2	0.607888245	-1.707112841	-0.279081741	0.867586262	0.727942728	-1.574039591	0.072922519	0.486008589	0.797885831	2
ITGA2B	1.108073848	-1.424941901	0.155954292	0.792775896	0.246336755	-1.394869046	-0.948012792	0.968116564	0.496566385	2
ITGA9	1.191039308	-0.796189437	-0.128786016	-0.102561615	1.184593135	-1.31586289	-1.31586289	0.302478841	0.981151563	2
ITPA	0.935403471	-1.632504749	-0.209610944	-0.035075302	0.775321545	-1.53582429	0.78434189	0.001593054	0.916355324	2
ITPR1	0.435176637	-0.342244946	-1.107566568	0.466476628	-0.119592596	0.198544614	-1.628829805	0.230025024	1.868011013	2
JADE1	0.816990259	-1.36012241	-0.71299483	0.571366193	0.773190343	-1.283137645	-0.680486945	0.635714447	1.239480589	2
JARID2	-0.572229598	-1.193091641	-0.144165244	0.362829445	1.487247927	-1.355975855	0.440996159	-0.342530099	1.316918906	2
JDP2	-0.38631352	-1.106856584	-0.455657344	1.86180013	0.737698529	-1.167487124	-0.601284779	0.729144087	0.388956605	2
JPT1	0.196534278	-1.075869632	-0.668569021	0.135371881	1.738245296	-1.034386502	-0.518482161	-0.169153531	1.396309392	2
KANSL1L	0.531100915	-1.889277876	0.194233564	1.203272227	0.707236377	-1.325679069	0.372573605	-0.246887962	0.453428219	2
KATNAL1	0.384484763	-1.285592638	-0.817343512	0.218558325	0.507714438	-1.186964448	0.502100831	-0.200373902	1.877416144	2
KCNG1	-0.3902016	-0.366674583	-1.247072291	1.306796069	0.83810815	-0.878137721	-1.067545813	1.225366069	0.579361719	2
KCNK6	-0.270060556	-0.577351352	-0.811150895	1.413850702	0.877855957	-0.366807705	-1.538207618	-0.01854993	1.290421397	2
KDM8	0.70285333	-1.263514997	-0.308333708	-0.562805634	1.219311213	-1.279357311	0.147957898	-0.179325503	1.523214711	2
KHDC1	1.146038157	-1.055919225	-0.941013981	1.407506347	0.628318089	-1.107602172	-0.867604425	0.299021385	0.491255826	2
KHSRP	0.159923882	-1.363777834	-0.679554388	0.64906087	0.368781383	-1.479565988	0.147197528	0.614601853	1.583332695	2
KIAA0586	1.305153891	-1.602992379	0.352922807	-0.388576135	0.329143007	-1.541061024	0.618738013	0.184013893	0.742657926	2
KIAA0753	0.796452541	-1.336081783	-0.437094852	1.416599451	0.524496738	-1.613489931	-0.250399106	0.585830593	0.313686349	2
KIAA1524	1.128456366	-1.68273605	0.800405209	0.240572568	0.510033652	-1.66366038	0.135307053	0.332680146	0.198941435	2
KIAA1958	-0.405218457	-1.169779859	-0.91723735	0.339685659	1.330843616	-1.018229451	-0.210367962	0.497591996	1.552711809	2
KIF11	0.581533034	-1.728916079	0.149962079	0.39274374	0.67448967	-1.726855691	0.309477701	0.507616502	0.839949045	2
KIF15	0.076317027	-1.547828281	0.741885657	0.437382874	0.786032643	-1.672286205	-0.291391773	0.362706112	1.107181946	2
KIF18A	0.7839235	-1.639736302	0.215371098	0.664431327	1.051730604	-1.545487886	-0.439951387	0.223717313	0.686001735	2
KIF20A	0.708841495	-1.156451773	-0.213322076	-0.044374729	1.972342232	-1.178153353	-0.661306111	-0.055363478	0.627787793	2
KIF22	0.420963241	-1.567956851	0.433651993	0.272656088	0.781197857	-1.710748649	0.004764265	0.120288177	1.245183879	2
KIF23	0.593398521	-1.504746357	0.369787001	0.038580725	1.374229842	-1.473515105	-0.290873017	-0.145957628	1.039096018	2
KIF2C	0.402760136	-1.35085887	-0.035349355	0.195571465	1.310697928	-1.387505931	-0.571917102	0.021392113	1.415209614	2
KIF4A	0.634409493	-1.562052458	-0.088234366	0.323359371	1.155260246	-1.555291309	-0.037162307	-0.006155698	1.135867029	2
KIFC1	1.095984472	-1.650445562	0.272280616	0.363278788	0.461175832	-1.673182324	-0.055943503	0.3204067	0.866444982	2
KLHL26	0.557627929	-0.579884799	-0.909633734	0.44833929	2.058748212	-0.605192129	-1.223102721	0.43609041	-0.182992457	2
KMT5C	-0.219351961	-1.353979584	-0.28195222	0.525181292	1.603192837	-1.576376288	0.382042053	0.198114009	0.723129861	2
KNOP1	0.357496329	-0.999698797	-0.642474386	-0.138947013	1.13594302	-1.077903634	-0.52325154	-0.038138186	1.926974207	2
KNTC1	0.319149666	-1.683582881	0.202680197	0.25630973	0.706945672	-1.674725081	1.026687523	0.076825832	0.769709343	2
KPNA2	0.961273556	-1.602046538	0.292628391	0.392317484	1.178314946	-1.551518024	-0.393860923	0.191432076	0.531459031	2
KPNA3	0.623524982	-0.558064107	-1.279966643	0.474648237	0.885932296	-0.457459674	-1.316690672	-0.017539246	1.645614827	2
KRAS	-0.156467625	-0.796392804	-0.936069138	0.531033176	0.839052704	-0.904722565	-0.699415361	0.08225257	2.040729043	2
L1TD1	0.220881968	-0.984609277	-0.733676685	0.119362892	1.678180951	-0.947533498	-0.801545573	0.009302507	1.439636716	2
L3HYPDH	-0.501509301	-1.58534508	0.55278401	-0.375057084	0.893153405	-1.112259263	1.298834906	-0.186618007	1.016016414	2
LAP3	-0.61553765	-1.321085356	0.444692356	-0.282351901	1.254270922	-1.553795241	0.460364423	0.586081093	1.027361353	2
LAPTM4B	0.431626034	-1.371334117	-0.666319621	0.254512677	1.637481002	-1.117402548	-0.445183843	0.147707425	1.128912992	2
LARP1	0.366272396	-1.319483247	-1.046713533	0.348254438	1.635323435	-1.179530086	0.070226094	0.243554265	0.882096238	2
LARP1B	0.454586401	-0.670372935	-0.917950785	0.372528822	-0.024755821	-0.883579599	-1.139047086	0.992170379	1.816420623	2
LBR	1.101666565	-1.395724011	-0.112625816	0.959875837	1.083532512	-1.45575009	-0.692769199	0.262687688	0.249106513	2
LDHA	0.550925612	-1.585590732	0.945142937	0.337228927	0.209925438	-1.579818342	-0.371282382	0.30947288	1.183995661	2
LDHAP4	1.79168181	-0.824563209	0.569617893	0.307872335	1.144728666	-0.879323918	-0.834774844	-0.858007276	-0.417231457	2
LDHB	0.731705888	-1.652354155	-0.357951883	0.840586766	0.649501315	-1.364342725	-0.491615076	0.928318837	0.716151032	2
LHPP	-0.055915256	-1.471202241	0.373200249	0.316449414	0.536386906	-1.631937025	-0.223334153	0.712605209	1.443746896	2
LIG1	0.537956359	-1.650555509	0.245980727	-0.023814951	0.745713082	-1.715996158	0.791024631	0.198226894	0.871464924	2
LIN28A	0.822113681	-1.016918627	-0.743495394	0.735263943	1.340286604	-1.080466826	-0.979567177	-0.189574142	1.112357937	2
[truncated: 5,288 more rows]
