# Supplementary material for: Derivation of trophoblast stem cells from naïve human pluripotent stem cells
Source: eLife journal article supplement (doi:10.7554/elife.52504), 2020-02-12
Supplement: supp [file elife-52504-supp-v1.zip › elife_poa_e52504_Supplementary_file_3.xlsx]

## Sheet: ToppFun_cluster1
Category	ID	Name	Source	p-value	q-value Bonferroni	q-value FDR B&H	q-value FDR B&Y	Hit Count in Query List	Hit Count in Genome	Hit in Query List
GO: Molecular Function	GO:0000981	DNA-binding transcription factor activity, RNA polymerase II-specific		1.201e-17	2.174e-14	2.174e-14	1.756e-13	196	1614	ZNF93,ZNF391,ZNF549,NANOG,ZFP57,ETV3,BCL11A,ZNF442,MECP2,MEF2C,ZNF568,MYSM1,RXRG,MEIS1,MEIS2,ZNF551,ZNF490,ZIC4,PARP1,SALL2,ZNF530,ZNF589,ZNF766,ZBTB18,ZNF548,ZNF614,FOXO1,KLF11,TEAD2,ZNF674,ZFP30,ZNF397,ZNF581,MLXIP,SKIL,ZNF416,AR,DNAJC2,PKNOX2,MSX1,ZBTB44,KLF7,NR5A2,SNAI2,ZSCAN18,HLTF,FOXP1,ZNF701,ZNF565,ZNF700,PRDM14,ZNF583,MYBL2,ZNF44,SOX5,SP4,ZNF266,SPIB,ZNF273,ZNF460,ZNF423,NPAS3,NDN,ZNF25,…
GO: Molecular Function	GO:0043565	sequence-specific DNA binding		3.547e-07	0.0006421	0.000321	0.002593	124	1199	ZNF93,NANOG,ETV3,BCL11A,MECP2,MEF2C,ZNF568,RXRG,MEIS1,MEIS2,STN1,ZIC4,PARP1,SALL2,ZNF589,NLRC5,ZBTB18,PIF1,FOXO1,TEAD2,BEND3,MLXIP,SKIL,AR,PKNOX2,MSX1,KLF7,NR5A2,SNAI2,HLTF,UHRF1,FOXP1,PRDM14,MYBL2,KDM3A,SP4,SPIB,ZNF423,NDN,HESX1,VENTX,LDB1,PER3,PER2,NFE2L1,NFYC,KDM2B,TAF1,FOXH1,ZEB1,AKNA,NSD1,TERF1,TERT,NR2F1,SIRT1,NKX1-2,ORC1,KAT7,ZBTB49,OTX2,ZSCAN10,ZNF827,HEY2,PRKN,PAX3,PBX1,TP53,HIVEP2,TRPS1…
GO: Molecular Function	GO:0008270	zinc ion binding		7.779e-07	0.001408	0.0004693	0.003791	93	844	DPF1,ZNF93,ZGRF1,ZSWIM1,TRIM22,ESCO1,RXRG,PARP1,ZCCHC7,MMP9,MMP11,SEC23A,TRAF7,ZCCHC8,SLU7,PIAS1,AR,TRIM45,MT1B,MT1E,MT1G,MT1H,MT1M,MT1X,KLF7,CXXC4,NR5A2,PRICKLE2,HLTF,UHRF1,ADAM33,SMPD1,CA5BP1,MMP24,CPSF4,SMPDL3A,ZFR2,KDM2B,NQO2,NOS1,TRIM60,CA7,CA9,USP13,ZEB1,CALB1,TRIM2,CPXM2,NSD1,CA13,ADAMTS8,PIAS2,NR2F1,ZFPM2,KAT7,CPXM1,PRKN,CDA,TP53,NAPEPLD,ENPP2,TRPS1,KLF4,HNF4A,ZNF257,NR1H2,VDR,RCHY1,CPE,S…
GO: Molecular Function	GO:0046914	transition metal ion binding		1.646e-06	0.00298	0.000745	0.006018	115	1124	DPF1,ZNF93,ZGRF1,ZSWIM1,TRIM22,F8,ESCO1,RXRG,PARP1,CYP4X1,ZCCHC7,MMP9,MMP11,ALOX12,SEC23A,ALOX15B,TRAF7,ZCCHC8,AOX1,SLU7,PIAS1,AR,TDP2,TRIM45,MT1B,MT1E,MT1G,MT1H,MT1M,MT1X,KLF7,CXXC4,NR5A2,PRICKLE2,HLTF,UHRF1,ADAM33,SMPD1,SNCB,KDM3A,FAXDC2,CA5BP1,MMP24,ALKBH1,CPSF4,SMPDL3A,ZFR2,KDM2B,NQO2,NOS1,TRIM60,CA7,CA9,CYP4V2,P4HA2,USP13,ZEB1,CALB1,TRIM2,CPXM2,NSD1,CA13,ADAMTS8,PIAS2,NR2F1,ZFPM2,KAT7,P4HA1,…
GO: Molecular Function	GO:0001067	regulatory region nucleic acid binding		2.513e-06	0.004548	0.0009096	0.007349	107	1036	ZNF93,NANOG,MBNL1,ETV3,BCL11A,MEF2C,ZNF568,RXRG,MEIS1,MEIS2,ZIC4,PARP1,SALL2,ZNF589,NLRC5,MAD2L2,KLF11,TEAD2,MLXIP,SKIL,AR,PKNOX2,MSX1,KLF7,NR5A2,SNAI2,HLTF,UHRF1,FOXP1,PRDM14,MYBL2,SOX5,KDM3A,SPIB,NDN,HESX1,VENTX,LDB1,PER3,PER2,NFE2L1,NFYC,KDM2B,TAF1,TAF7,FOXH1,NPM1,ZEB1,AKNA,NSD1,NR2F1,SIRT1,NKX1-2,KAT7,OTX2,ZNF827,HEY2,PRKN,PBX1,TP53,HIVEP2,TRPS1,SSBP2,KLF4,FOXA3,HNF4A,OVOL2,HOXA3,HOXB3,NANOGP…
GO: Molecular Function	GO:0044212	transcription regulatory region DNA binding		3.446e-06	0.006238	0.00104	0.008399	106	1031	ZNF93,NANOG,ETV3,BCL11A,MEF2C,ZNF568,RXRG,MEIS1,MEIS2,ZIC4,PARP1,SALL2,ZNF589,NLRC5,MAD2L2,KLF11,TEAD2,MLXIP,SKIL,AR,PKNOX2,MSX1,KLF7,NR5A2,SNAI2,HLTF,UHRF1,FOXP1,PRDM14,MYBL2,SOX5,KDM3A,SPIB,NDN,HESX1,VENTX,LDB1,PER3,PER2,NFE2L1,NFYC,KDM2B,TAF1,TAF7,FOXH1,NPM1,ZEB1,AKNA,NSD1,NR2F1,SIRT1,NKX1-2,KAT7,OTX2,ZNF827,HEY2,PRKN,PBX1,TP53,HIVEP2,TRPS1,SSBP2,KLF4,FOXA3,HNF4A,OVOL2,HOXA3,HOXB3,NANOGP1,PLAG…
GO: Molecular Function	GO:0000976	transcription regulatory region sequence-specific DNA binding		1.045e-05	0.01891	0.002502	0.02021	93	898	ZNF93,NANOG,ETV3,BCL11A,MEF2C,ZNF568,RXRG,MEIS1,MEIS2,ZIC4,PARP1,SALL2,ZNF589,NLRC5,MLXIP,SKIL,AR,PKNOX2,MSX1,KLF7,NR5A2,SNAI2,HLTF,UHRF1,FOXP1,PRDM14,MYBL2,KDM3A,SPIB,NDN,HESX1,VENTX,LDB1,PER3,PER2,NFE2L1,NFYC,KDM2B,TAF1,ZEB1,AKNA,NSD1,NR2F1,SIRT1,NKX1-2,OTX2,ZNF827,HEY2,PRKN,PBX1,TP53,HIVEP2,TRPS1,SSBP2,KLF4,HNF4A,HOXA3,HOXB3,NANOGP1,PLAGL1,NR1H2,KDM6A,VDR,PRRX1,POU5F1,IFI16,ZIC1,CNBP,BCL11B,TE…
GO: Molecular Function	GO:1990837	sequence-specific double-stranded DNA binding		1.106e-05	0.02002	0.002502	0.02021	97	948	ZNF93,NANOG,ETV3,BCL11A,MEF2C,ZNF568,RXRG,MEIS1,MEIS2,ZIC4,PARP1,SALL2,ZNF589,NLRC5,BEND3,MLXIP,SKIL,AR,PKNOX2,MSX1,KLF7,NR5A2,SNAI2,HLTF,UHRF1,FOXP1,PRDM14,MYBL2,KDM3A,SPIB,NDN,HESX1,VENTX,LDB1,PER3,PER2,NFE2L1,NFYC,KDM2B,TAF1,ZEB1,AKNA,NSD1,NR2F1,SIRT1,NKX1-2,ORC1,KAT7,OTX2,ZNF827,HEY2,PRKN,PBX1,TP53,HIVEP2,TRPS1,SSBP2,KLF4,HNF4A,HOXA3,HOXB3,NANOGP1,PLAGL1,NR1H2,KDM6A,VDR,PRRX1,POLA1,POU5F1,IFI…
GO: Molecular Function	GO:0003690	double-stranded DNA binding		3.177e-05	0.05751	0.00639	0.05162	103	1048	ZNF93,NANOG,ETV3,BCL11A,MND1,MECP2,MEF2C,ZNF568,RXRG,MEIS1,MEIS2,ZIC4,PARP1,SALL2,ZNF589,NLRC5,BEND3,MLXIP,SKIL,AR,PKNOX2,MSX1,KLF7,NR5A2,SNAI2,HLTF,UHRF1,FOXP1,PRDM14,MYBL2,KDM3A,SPIB,NDN,HESX1,VENTX,LDB1,PER3,PER2,NFE2L1,NFYC,KDM2B,TAF1,ZEB1,AKNA,NSD1,TERF1,NR2F1,SIRT1,NKX1-2,ORC1,KAT7,MSH6,OTX2,ZNF827,HEY2,PRKN,PBX1,TP53,HIVEP2,TRPS1,HMGB3,SSBP2,KLF4,HNF4A,HOXA3,HOXB3,NANOGP1,PLAGL1,NR1H2,KDM6…
GO: Molecular Function	GO:0000977	RNA polymerase II regulatory region sequence-specific DNA binding		3.548e-05	0.06421	0.006421	0.05187	87	853	NANOG,ETV3,BCL11A,MEF2C,RXRG,MEIS1,MEIS2,ZIC4,PARP1,SALL2,ZNF589,NLRC5,MLXIP,SKIL,AR,PKNOX2,MSX1,KLF7,NR5A2,SNAI2,HLTF,FOXP1,PRDM14,MYBL2,KDM3A,SPIB,NDN,HESX1,VENTX,PER2,NFE2L1,NFYC,KDM2B,TAF1,ZEB1,AKNA,NSD1,NR2F1,SIRT1,NKX1-2,OTX2,ZNF827,HEY2,PBX1,TP53,HIVEP2,TRPS1,SSBP2,KLF4,HNF4A,HOXA3,HOXB3,NANOGP1,PLAGL1,NR1H2,KDM6A,VDR,PRRX1,POU5F1,IFI16,ZIC1,CNBP,BCL11B,TESMIN,ZSCAN21,PROX1,ZFP42,ZBTB16,DA…
GO: Molecular Function	GO:0001012	RNA polymerase II regulatory region DNA binding		4.97e-05	0.08996	0.008178	0.06606	87	861	NANOG,ETV3,BCL11A,MEF2C,RXRG,MEIS1,MEIS2,ZIC4,PARP1,SALL2,ZNF589,NLRC5,MLXIP,SKIL,AR,PKNOX2,MSX1,KLF7,NR5A2,SNAI2,HLTF,FOXP1,PRDM14,MYBL2,KDM3A,SPIB,NDN,HESX1,VENTX,PER2,NFE2L1,NFYC,KDM2B,TAF1,ZEB1,AKNA,NSD1,NR2F1,SIRT1,NKX1-2,OTX2,ZNF827,HEY2,PBX1,TP53,HIVEP2,TRPS1,SSBP2,KLF4,HNF4A,HOXA3,HOXB3,NANOGP1,PLAGL1,NR1H2,KDM6A,VDR,PRRX1,POU5F1,IFI16,ZIC1,CNBP,BCL11B,TESMIN,ZSCAN21,PROX1,ZFP42,ZBTB16,DA…
GO: Molecular Function	GO:0005005	transmembrane-ephrin receptor activity		5.915e-05	0.1071	0.008921	0.07207	7	17	EPHB2,EFNB3,EPHA3,EPHA4,EPHA7,EPHA8,EPHB1
GO: Molecular Function	GO:0005003	ephrin receptor activity		0.0001363	0.2466	0.01897	0.1533	7	19	EPHB2,EFNB3,EPHA3,EPHA4,EPHA7,EPHA8,EPHB1
GO: Biological Process	GO:0040007	growth		2.897e-12	2.442e-08	2.399e-08	2.308e-07	136	1182	MAP1B,MAP2,BCL11A,ACVR1B,MDK,NRN1,MECP2,MEF2C,MEIS1,PARP1,FBP1,FGF2,FGFR3,ULK1,MAD2L2,FHL1,CXCL12,IL17RB,ALOX15B,SEMA3C,CPNE9,SFRP5,SLC25A4,AR,DNAJC2,MSX1,MT1B,MT1E,MT1G,MT1H,MT1M,MT1X,SLIT3,EPC1,FOXP1,SMO,TMEM108,BBC3,UNC13A,GAP43,ATP8A2,FSTL4,BBS2,NCAM1,NDN,BCL2L1,GDI1,NRP2,SOCS2,GJA1,ALKBH1,BMPR1B,NF2,SGPL1,KDM2B,C3,SEMA4A,NPM1,NRCAM,SEMA5A,SIRT1,ZFPM2,TGFB2,TGFB3,LEFTY2,TGFBR1,THBS1,FAM107A,C…
GO: Biological Process	GO:0040008	regulation of growth		5.693e-12	4.799e-08	2.399e-08	2.308e-07	102	801	MAP1B,MAP2,BCL11A,ACVR1B,MECP2,MEF2C,MEIS1,PARP1,FBP1,FGF2,FGFR3,ULK1,MAD2L2,FHL1,CXCL12,IL17RB,ALOX15B,SEMA3C,CPNE9,SFRP5,SLC25A4,AR,DNAJC2,MSX1,MT1B,MT1E,MT1G,MT1H,MT1M,MT1X,SLIT3,EPC1,FOXP1,SMO,BBC3,UNC13A,GAP43,ATP8A2,FSTL4,BBS2,NCAM1,NDN,BCL2L1,GDI1,SOCS2,GJA1,NF2,SGPL1,KDM2B,C3,SEMA4A,NPM1,NRCAM,SEMA5A,SIRT1,ZFPM2,TGFB2,TGFBR1,FAM107A,CD44,HEY2,CD81,PRKN,CDA,CDH4,TP53,CDKN2D,NRG1,CACNA2D2,S…
GO: Biological Process	GO:0045926	negative regulation of growth		1.179e-11	9.937e-08	3.312e-08	3.185e-07	52	295	MAP2,BCL11A,ACVR1B,MECP2,MEIS1,FBP1,FGFR3,ULK1,FHL1,ALOX15B,SEMA3C,SFRP5,DNAJC2,MSX1,MT1B,MT1E,MT1G,MT1H,MT1M,MT1X,SLIT3,FOXP1,BBC3,FSTL4,BBS2,SOCS2,GJA1,NF2,SEMA4A,SEMA5A,SIRT1,TGFB2,CDA,TP53,CDKN2D,SAV1,HNF4A,MYOZ1,HYAL1,WNT3,NKD1,ULK2,CXADR,SEMA3E,CYP27B1,DCC,ST7L,RGS2,RGS4,GAL,ING4,EPHA7
GO: Biological Process	GO:0016049	cell growth		1.62e-09	1.366e-05	3.414e-06	3.283e-05	75	577	MAP1B,MAP2,BCL11A,ACVR1B,NRN1,MECP2,FBP1,ULK1,MAD2L2,FHL1,CXCL12,IL17RB,SEMA3C,CPNE9,SLC25A4,DNAJC2,MSX1,SLIT3,FOXP1,SMO,TMEM108,BBC3,UNC13A,FSTL4,NDN,GDI1,NRP2,SOCS2,GJA1,NF2,KDM2B,SEMA4A,NPM1,NRCAM,SEMA5A,SIRT1,TGFB2,TGFB3,LEFTY2,TGFBR1,FAM107A,CD44,CD81,PRKN,CDA,CDH4,TP53,CDKN2D,NRG1,HNF4A,HPN,FLRT3,HYAL1,WNT3,MAP2K5,ULK2,SEMA3E,KIF26A,CYP27B1,DBN1,DCC,ST7L,ARHGEF11,DCX,ZEB2,RGS2,RGS4,GAL,RND2…
GO: Biological Process	GO:0000122	negative regulation of transcription by RNA polymerase II		3.209e-09	2.705e-05	5.41e-06	5.203e-05	105	931	NANOG,ZFP57,ETV3,BCL11A,MECP2,MEF2C,ZNF568,MEIS2,PARP1,SALL2,FBP1,ZNF608,ATXN1,ZNF589,FGFR3,MAD2L2,FST,ZBTB18,FOXO1,TRAF7,KLF11,BEND3,SKIL,PIAS1,HDAC7,AR,LARP7,TXNIP,MSX1,LEFTY1,KLF7,TAGLN3,EPC1,SNAI2,UHRF1,FOXP1,SMO,PRDM14,EAPP,HESX1,VENTX,LDB1,PER3,PER2,KDM2B,TAF1,TAF7,FOXH1,NODAL,CBX2,ZEB1,ZNF354A,NSD1,DNAJB4,NR2F1,SIRT1,ZFPM2,DNAJA3,TGFBR1,MEPCE,HEY2,PRKN,PAX3,HCLS1,TP53,TRPS1,KLF4,OVOL2,HOXB…
GO: Biological Process	GO:0032990	cell part morphogenesis		8.98e-09	7.57e-05	1.108e-05	0.0001065	91	783	EPHB2,MAP1A,MAP1B,MAP2,BCL11A,MDK,NRN1,MECP2,FGFR3,ULK1,FBXO45,CXCL12,SEMA3C,CPNE9,LRRC4C,SKIL,CASK,KLF7,SLIT3,FOXP1,SMO,TMEM108,UNC13A,NES,GAP43,UNC5B,ATP8A2,FSTL4,NCAM1,NDN,BCL2L1,GDI1,CNTN6,NRP2,NEFM,GJA1,NEFL,BMPR1B,SLITRK2,SEMA4A,GPM6A,CNTN4,CACNA1F,NPTX1,NRCAM,NTF3,NTRK2,SEMA5A,PIAS2,TGFB2,OTX2,LINGO1,CD44,KLK8,PRKN,CDH4,DOK6,NRG1,PDLIM7,ENPP2,FLRT3,PMP22,VIL1,CHODL,WNT3,BCL11B,KNDC1,DNM3,U…
GO: Biological Process	GO:0048598	embryonic morphogenesis		1.025e-08	8.641e-05	1.108e-05	0.0001065	82	681	EPHB2,NANOG,MBNL1,ACVR2A,WLS,MEF2C,ZNF568,FBN1,FGF2,MMP9,TEAD2,SHROOM3,SFRP5,AR,MSX1,PLPP3,SMO,ATP8A2,HESX1,GJA1,PHLDB1,GJB5,VENTX,LDB1,NF2,KDM2B,FOXH1,NODAL,LIAS,ZEB1,NSD1,TDGF1,TGFB2,TGFB3,TGFBR1,OTX2,PAX3,PBX1,TP53,PDGFRA,APELA,KLF4,HNF4A,OVOL2,HOXA3,HOXB3,HPN,CTHRC1,FLRT3,KDM6A,VCAM1,COL2A1,COL5A1,COL5A2,PRRX1,COL11A1,COL12A1,HYAL1,WNT3,POU5F1,ZIC1,IGF2,TENM4,MAP2K5,NDRG4,IPMK,PROX1,ZBTB16,PS…
GO: Biological Process	GO:0048858	cell projection morphogenesis		1.105e-08	9.319e-05	1.108e-05	0.0001065	89	763	EPHB2,MAP1A,MAP1B,MAP2,BCL11A,MDK,NRN1,MECP2,FGFR3,ULK1,FBXO45,CXCL12,SEMA3C,CPNE9,LRRC4C,SKIL,CASK,KLF7,SLIT3,FOXP1,SMO,TMEM108,UNC13A,NES,GAP43,UNC5B,ATP8A2,FSTL4,NCAM1,NDN,GDI1,CNTN6,NRP2,NEFM,GJA1,NEFL,BMPR1B,SLITRK2,SEMA4A,GPM6A,CNTN4,CACNA1F,NPTX1,NRCAM,NTF3,NTRK2,SEMA5A,PIAS2,TGFB2,OTX2,LINGO1,CD44,KLK8,PRKN,CDH4,DOK6,NRG1,PDLIM7,ENPP2,FLRT3,PMP22,VIL1,CHODL,WNT3,BCL11B,KNDC1,DNM3,ULK2,SEM…
GO: Biological Process	GO:0007409	axonogenesis		1.183e-08	9.97e-05	1.108e-05	0.0001065	69	537	EPHB2,MAP1A,MAP1B,MAP2,BCL11A,NRN1,FGFR3,ULK1,FBXO45,CXCL12,SEMA3C,LRRC4C,SKIL,KLF7,SLIT3,FOXP1,SMO,GAP43,UNC5B,ATP8A2,FSTL4,NCAM1,NDN,GDI1,CNTN6,NRP2,NEFM,NEFL,BMPR1B,SLITRK2,SEMA4A,CNTN4,CACNA1F,NPTX1,NRCAM,NTF3,NTRK2,SEMA5A,TGFB2,OTX2,LINGO1,CDH4,DOK6,NRG1,PDLIM7,FLRT3,PMP22,CHODL,WNT3,BCL11B,ULK2,SEMA3E,BOC,DBN1,DCC,DCX,ZEB2,STMN1,VANGL2,ABLIM1,EFNB3,LRP4,LGR6,RND2,EPHA3,EPHA4,EPHA7,EPHA8,EPH…
GO: Biological Process	GO:0045944	positive regulation of transcription by RNA polymerase II		1.371e-08	0.0001156	1.156e-05	0.0001112	134	1315	DPF1,NANOG,LAGE3,ACVR1B,ACVR2A,MEF2C,MYSM1,RXRG,MEIS1,MEIS2,PARP1,SALL2,ATXN1,JAG1,FGF2,NLRC5,ZBTB18,FOXO1,TEAD2,MLXIP,IL23A,AR,SBNO2,CASK,MSX1,KLF7,EPC1,NR5A2,HLTF,UHRF1,FOXP1,SMO,MYBL2,SOX5,KDM3A,EAPP,SPIB,NPAS3,NDN,RAD54L2,BMPR1B,VENTX,LDB1,NFE2L1,NFYC,TAF1,TAF4B,TAF7,FOXH1,NODAL,NOS1,NPM1,ZEB1,NTF3,AKNA,TDGF1,PIAS2,TERT,NR2F1,SIRT1,ZFPM2,NKX1-2,TGFB2,TGFB3,TGFBR1,KAT7,ZBTB49,OTX2,HEY2,CD81,PR…
GO: Biological Process	GO:0048638	regulation of developmental growth		1.912e-08	0.0001612	1.465e-05	0.0001409	58	424	MAP1B,MAP2,BCL11A,MECP2,MEF2C,MEIS1,FGF2,FGFR3,ULK1,CXCL12,SEMA3C,CPNE9,SFRP5,SLC25A4,AR,FOXP1,SMO,UNC13A,ATP8A2,FSTL4,BBS2,NCAM1,GDI1,SOCS2,GJA1,SGPL1,C3,SEMA4A,NRCAM,SEMA5A,SIRT1,ZFPM2,TGFBR1,HEY2,PRKN,CDH4,NRG1,CACNA2D2,SAV1,MYOZ1,VIL1,WNT3,IGF2,NKD1,ULK2,CXADR,SEMA3E,PROX1,EPPK1,DBN1,DCC,DCX,BCL2L11,RGS2,RGS4,GAL,RND2,EPHA7
GO: Biological Process	GO:0048589	developmental growth		2.285e-08	0.0001926	1.605e-05	0.0001544	93	822	MAP1B,MAP2,BCL11A,MDK,NRN1,MECP2,MEF2C,MEIS1,FGF2,FGFR3,ULK1,CXCL12,SEMA3C,CPNE9,SFRP5,SLC25A4,AR,SLIT3,FOXP1,SMO,TMEM108,UNC13A,GAP43,ATP8A2,FSTL4,BBS2,NCAM1,NDN,GDI1,NRP2,SOCS2,GJA1,ALKBH1,BMPR1B,SGPL1,C3,SEMA4A,NRCAM,SEMA5A,SIRT1,ZFPM2,TGFB2,TGFBR1,THBS1,HEY2,CD81,PRKN,CDH4,TP53,NRG1,PDGFRA,CACNA2D2,SAV1,MYOZ1,FLRT3,KDM6A,MYMX,PMP22,VIL1,COL6A3,COL12A1,WNT3,POU5F1,ACVR1C,IGF2,TENM4,NKD1,CCM2L,…
GO: Biological Process	GO:0045934	negative regulation of nucleobase-containing compound metabolic process		2.645e-08	0.000223	1.653e-05	0.0001589	153	1573	DPF1,ZNF93,NANOG,ZFP57,ETV3,BCL11A,TRIM22,MECP2,MEF2C,ZNF568,MEIS2,STN1,PARP1,SALL2,FBP1,ZNF608,ATXN1,ZNF589,FGFR3,MAD2L2,FST,ZBTB18,PIF1,FOXO1,TRAF7,KLF11,ZNF674,BEND3,ZNF397,SKIL,ERN2,PIAS1,HDAC7,AR,TDP2,LARP7,DNAJC2,SBNO2,TXNIP,MSX1,LEFTY1,KLF7,TAGLN3,EPC1,SNAI2,UHRF1,FOXP1,SMO,PRDM14,SOX5,UIMC1,EAPP,ZNF423,BARD1,BCL7A,HESX1,HELB,GJA1,VENTX,LDB1,PER3,PER2,ANGEL2,KDM2B,TAF1,TAF7,FOXH1,NODAL,CBX…
GO: Biological Process	GO:0048729	tissue morphogenesis		2.762e-08	0.0002328	1.653e-05	0.0001589	96	861	NANOG,ACTA2,ACTC1,ACVR2A,MDK,WLS,MEF2C,JAG1,GPC4,CRB3,FGF2,FGFR3,MMP9,FST,ALOX12,CXCL12,TEAD2,SEMA3C,SHROOM3,SFRP5,AR,MSX1,PLPP3,SNAI2,DCHS1,PRICKLE2,FOXP1,SMO,GCNT1,HESX1,NRP2,GJA1,PHLDB1,LDB1,NF2,ADAMTS16,KDM2B,FOXH1,NODAL,CA9,LIAS,CARMIL2,NSD1,SEMA5A,TDGF1,ZFPM2,TGFB2,TGFB3,TGFBR1,OTX2,CD44,HEY2,PAX3,PBX1,TP53,NRG1,PDGFRA,APELA,KLF4,HNF4A,OVOL2,CTHRC1,FLRT3,KDM6A,VDR,COL3A1,COL5A1,COL5A2,COL6A…
GO: Biological Process	GO:0001558	regulation of cell growth		2.941e-08	0.0002479	1.653e-05	0.0001589	64	494	MAP1B,MAP2,BCL11A,ACVR1B,MECP2,FBP1,ULK1,MAD2L2,FHL1,CXCL12,IL17RB,SEMA3C,CPNE9,SLC25A4,DNAJC2,MSX1,SLIT3,FOXP1,BBC3,UNC13A,FSTL4,GDI1,SOCS2,GJA1,NF2,KDM2B,SEMA4A,NPM1,NRCAM,SEMA5A,SIRT1,TGFB2,TGFBR1,FAM107A,CD44,CD81,PRKN,CDA,CDH4,TP53,CDKN2D,NRG1,HNF4A,HPN,HYAL1,WNT3,MAP2K5,ULK2,SEMA3E,KIF26A,CYP27B1,DBN1,DCC,ST7L,ARHGEF11,DCX,RGS2,RGS4,GAL,RND2,LEF1,ZNF639,RASGRP2,EPHA7
GO: Biological Process	GO:0061564	axon development		3.183e-08	0.0002683	1.677e-05	0.0001613	72	584	EPHB2,MAP1A,MAP1B,MAP2,BCL11A,NRN1,FGFR3,ULK1,FBXO45,CXCL12,SEMA3C,LRRC4C,SKIL,KLF7,SLIT3,FOXP1,SMO,GAP43,UNC5B,ATP8A2,FSTL4,NCAM1,NDN,GDI1,CNTN6,NRP2,NEFM,NEFL,BMPR1B,SLITRK2,SEMA4A,CNTN4,CACNA1F,NPTX1,NRCAM,NTF3,NTRK2,SEMA5A,TGFB2,OTX2,LINGO1,KLK8,CDH4,DOK6,NRG1,PDLIM7,KLF4,FLRT3,PMP22,CHODL,WNT3,BCL11B,ULK2,SEMA3E,BOC,DBN1,DCC,DCX,ZEB2,LRIG2,STMN1,VANGL2,ABLIM1,EFNB3,LRP4,LGR6,RND2,EPHA3,EPHA4…
GO: Biological Process	GO:0120039	plasma membrane bounded cell projection morphogenesis		3.432e-08	0.0002893	1.702e-05	0.0001637	87	758	EPHB2,MAP1A,MAP1B,MAP2,BCL11A,NRN1,MECP2,FGFR3,ULK1,FBXO45,CXCL12,SEMA3C,CPNE9,LRRC4C,SKIL,CASK,KLF7,SLIT3,FOXP1,SMO,TMEM108,UNC13A,GAP43,UNC5B,ATP8A2,FSTL4,NCAM1,NDN,GDI1,CNTN6,NRP2,NEFM,GJA1,NEFL,BMPR1B,SLITRK2,SEMA4A,GPM6A,CNTN4,CACNA1F,NPTX1,NRCAM,NTF3,NTRK2,SEMA5A,PIAS2,TGFB2,OTX2,LINGO1,CD44,KLK8,PRKN,CDH4,DOK6,NRG1,PDLIM7,ENPP2,FLRT3,PMP22,VIL1,CHODL,WNT3,BCL11B,KNDC1,DNM3,ULK2,SEMA3E,BOC,…
GO: Biological Process	GO:0045892	negative regulation of transcription, DNA-templated		4.549e-08	0.0003834	2.13e-05	0.0002049	132	1316	DPF1,ZNF93,NANOG,ZFP57,ETV3,BCL11A,MECP2,MEF2C,ZNF568,MEIS2,PARP1,SALL2,FBP1,ZNF608,ATXN1,ZNF589,FGFR3,MAD2L2,FST,ZBTB18,FOXO1,TRAF7,KLF11,ZNF674,BEND3,ZNF397,SKIL,ERN2,PIAS1,HDAC7,AR,LARP7,SBNO2,TXNIP,MSX1,LEFTY1,KLF7,TAGLN3,EPC1,SNAI2,UHRF1,FOXP1,SMO,PRDM14,SOX5,UIMC1,EAPP,ZNF423,BCL7A,HESX1,VENTX,LDB1,PER3,PER2,KDM2B,TAF1,TAF7,FOXH1,NODAL,CBX2,ZEB1,ZNF354A,NSD1,DNAJB4,NR2F1,SIRT1,ZFPM2,DNAJA3,…
GO: Biological Process	GO:0048640	negative regulation of developmental growth		9.809e-08	0.0008269	4.352e-05	0.0004185	27	137	MAP2,BCL11A,MECP2,MEIS1,FGFR3,ULK1,SEMA3C,SFRP5,FOXP1,FSTL4,BBS2,SOCS2,GJA1,SEMA4A,SEMA5A,SAV1,MYOZ1,WNT3,NKD1,ULK2,CXADR,SEMA3E,DCC,RGS2,RGS4,GAL,EPHA7
GO: Biological Process	GO:0048812	neuron projection morphogenesis		1.155e-07	0.0009733	4.78e-05	0.0004597	84	743	EPHB2,MAP1A,MAP1B,MAP2,BCL11A,NRN1,MECP2,FGFR3,ULK1,FBXO45,CXCL12,SEMA3C,CPNE9,LRRC4C,SKIL,CASK,KLF7,SLIT3,FOXP1,SMO,TMEM108,UNC13A,GAP43,UNC5B,ATP8A2,FSTL4,NCAM1,NDN,GDI1,CNTN6,NRP2,NEFM,GJA1,NEFL,BMPR1B,SLITRK2,SEMA4A,GPM6A,CNTN4,CACNA1F,NPTX1,NRCAM,NTF3,NTRK2,SEMA5A,PIAS2,TGFB2,OTX2,LINGO1,KLK8,PRKN,CDH4,DOK6,NRG1,PDLIM7,FLRT3,PMP22,CHODL,WNT3,BCL11B,KNDC1,DNM3,ULK2,SEMA3E,BOC,LZTS3,DBN1,DCC,D…
GO: Biological Process	GO:0051253	negative regulation of RNA metabolic process		1.191e-07	0.001004	4.78e-05	0.0004597	142	1467	DPF1,ZNF93,NANOG,ZFP57,ETV3,BCL11A,TRIM22,MECP2,MEF2C,ZNF568,MEIS2,PARP1,SALL2,FBP1,ZNF608,ATXN1,ZNF589,FGFR3,MAD2L2,FST,ZBTB18,FOXO1,TRAF7,KLF11,ZNF674,BEND3,ZNF397,SKIL,ERN2,PIAS1,HDAC7,AR,TDP2,LARP7,SBNO2,TXNIP,MSX1,LEFTY1,KLF7,TAGLN3,EPC1,SNAI2,UHRF1,FOXP1,SMO,PRDM14,SOX5,UIMC1,EAPP,ZNF423,BARD1,BCL7A,HESX1,VENTX,LDB1,PER3,PER2,ANGEL2,KDM2B,TAF1,TAF7,FOXH1,NODAL,CBX2,NPM1,ZEB1,ZNF354A,NSD1,DN…
GO: Biological Process	GO:0042127	regulation of cell population proliferation		1.465e-07	0.001235	5.615e-05	0.00054	176	1921	GGNBP2,MATK,NANOG,ETV3,CD320,MDK,NDRG2,CCL26,F3,MECP2,MEF2C,MEIS1,MEIS2,FABP6,ADORA2B,ATXN1,JAG1,FGF2,FGFR3,SRPX,GPNMB,MMP9,ALOX12,CDCA7L,CXCL12,ALOX15B,FOXO1,KLF11,SFRP5,DPPA2,VASH1,IFITM1,ST6GAL1,IL23A,PIAS1,AR,CASK,TXNIP,MSX1,PYCARD,SLIT3,NR5A2,SNAI2,UHRF1,ADAM33,FOXP1,SMO,BECN1,NES,SPARC,EAPP,ATP8A2,NCAM1,NDN,BCL2L1,GCNT2,NRP2,GJA1,BMPR1B,PER2,NF2,BTK,SYK,KDM2B,TMEM131L,TAF4B,NQO2,NODAL,NOS1,…
GO: Biological Process	GO:1903507	negative regulation of nucleic acid-templated transcription		1.552e-07	0.001308	5.687e-05	0.0005469	134	1370	DPF1,ZNF93,NANOG,ZFP57,ETV3,BCL11A,TRIM22,MECP2,MEF2C,ZNF568,MEIS2,PARP1,SALL2,FBP1,ZNF608,ATXN1,ZNF589,FGFR3,MAD2L2,FST,ZBTB18,FOXO1,TRAF7,KLF11,ZNF674,BEND3,ZNF397,SKIL,ERN2,PIAS1,HDAC7,AR,TDP2,LARP7,SBNO2,TXNIP,MSX1,LEFTY1,KLF7,TAGLN3,EPC1,SNAI2,UHRF1,FOXP1,SMO,PRDM14,SOX5,UIMC1,EAPP,ZNF423,BCL7A,HESX1,VENTX,LDB1,PER3,PER2,KDM2B,TAF1,TAF7,FOXH1,NODAL,CBX2,ZEB1,ZNF354A,NSD1,DNAJB4,NR2F1,SIRT1,Z…
GO: Biological Process	GO:1902679	negative regulation of RNA biosynthetic process		1.687e-07	0.001422	5.924e-05	0.0005697	134	1372	DPF1,ZNF93,NANOG,ZFP57,ETV3,BCL11A,TRIM22,MECP2,MEF2C,ZNF568,MEIS2,PARP1,SALL2,FBP1,ZNF608,ATXN1,ZNF589,FGFR3,MAD2L2,FST,ZBTB18,FOXO1,TRAF7,KLF11,ZNF674,BEND3,ZNF397,SKIL,ERN2,PIAS1,HDAC7,AR,TDP2,LARP7,SBNO2,TXNIP,MSX1,LEFTY1,KLF7,TAGLN3,EPC1,SNAI2,UHRF1,FOXP1,SMO,PRDM14,SOX5,UIMC1,EAPP,ZNF423,BCL7A,HESX1,VENTX,LDB1,PER3,PER2,KDM2B,TAF1,TAF7,FOXH1,NODAL,CBX2,ZEB1,ZNF354A,NSD1,DNAJB4,NR2F1,SIRT1,Z…
GO: Biological Process	GO:0009790	embryo development		2.228e-07	0.001879	7.514e-05	0.0007226	125	1263	EPHB2,GGNBP2,NANOG,MBNL1,ZFP57,ACVR1B,ACVR2A,WLS,MECP2,MEF2C,ZNF568,FBN1,SALL2,FGF2,MMP9,ZBTB18,TEAD2,SEMA3C,SHROOM3,SFRP5,VASH1,SKIL,AR,MSX1,PLPP3,CXXC4,NR5A2,DCHS1,PRICKLE2,FOXP1,SMO,TBC1D23,PRDM14,SOX5,NES,ATP8A2,BCL2L1,HESX1,NRP2,GJA1,ALKBH1,PHLDB1,GJB5,VENTX,LDB1,NF2,KDM2B,FOXH1,NODAL,LIAS,SLC25A20,ZEB1,NSD1,TDGF1,NXN,ZFPM2,TGFB2,TGFB3,DNAJA3,TGFBR1,OTX2,HEY2,PAX3,PBX1,DISP1,TP53,PDGFRA,APEL…
GO: Biological Process	GO:0030308	negative regulation of cell growth		2.588e-07	0.002182	8.391e-05	0.000807	35	217	MAP2,BCL11A,ACVR1B,MECP2,FBP1,ULK1,FHL1,SEMA3C,DNAJC2,MSX1,SLIT3,FOXP1,BBC3,FSTL4,GJA1,NF2,SEMA4A,SEMA5A,SIRT1,TGFB2,CDA,TP53,CDKN2D,HNF4A,HYAL1,WNT3,ULK2,SEMA3E,CYP27B1,DCC,ST7L,RGS2,RGS4,GAL,EPHA7
GO: Biological Process	GO:0097435	supramolecular fiber organization		3.581e-07	0.003019	0.0001118	0.001075	81	727	MAP1A,MAP1B,MAP2,RHOJ,ACTC1,NCKAP5,CCL26,TRDN,MECP2,MEF2C,TUBB4A,FAT1,MAD2L2,MMP11,BAIAP2L2,CXCL12,SHROOM3,SORBS1,ARHGEF15,RHOH,PYCARD,FOXP1,LIMCH1,FSCN1,INPP5J,IQGAP2,JMY,NEFM,NEFL,NF2,GMFB,NPHS1,CARMIL2,CAPG,SEMA5A,TERF1,SERPINH1,TGFB2,TGFB3,TGFBR1,FAM107A,P4HA1,PRKN,WDR73,CGNL1,TNNT1,HCLS1,CHP1,SYNPO2,PDGFRA,PRUNE1,MID1IP1,MYOZ1,PLS3,COL1A2,COL2A1,COL3A1,VIL1,COL5A1,COL5A2,COL11A1,COL12A1,CLIP…
GO: Biological Process	GO:0051094	positive regulation of developmental process		4.591e-07	0.00387	0.0001382	0.001329	152	1633	EPHB2,RAMP2,MAP1B,RHOJ,BCL11A,ACVR1B,ACVR2A,MDK,F3,MECP2,MEF2C,PARP1,ATXN1,JAG1,LRRTM4,FGF2,FGFR3,MAD2L2,MMP9,FST,ALOX12,CXCL12,ALOX15B,SEMA3C,CPNE9,SLC25A4,IFITM1,SKIL,IL23A,PIAS1,HDAC7,AR,CASK,SLC25A12,EPC1,SNAI2,SMO,PRDM14,UNC13A,GPRC5B,SOX5,ATP8A2,BBS2,NCAM1,GCNT2,GDI1,SOCS2,GJA1,PROM1,NEFL,BMPR1B,PHLDB1,SLITRK2,NF2,BTK,SYK,KDM2B,C3,SEMA4A,NODAL,ZEB1,CARMIL2,NRCAM,NTF3,NTRK2,NFKBIZ,SEMA5A,PIA…
GO: Biological Process	GO:0019827	stem cell population maintenance		5.937e-07	0.005005	0.0001726	0.00166	31	186	NANOG,JAG1,FGF2,FGFR3,FOXO1,DPPA2,FOXP1,SMO,PRDM14,KDM3A,MMP24,LDB1,KDM2B,NODAL,TDGF1,ZSCAN10,PBX1,SAV1,KLF4,PRRX1,POLR2D,POLR2G,POU5F1,PROX1,TRIM8,LBH,SALL4,PIWIL2,VANGL2,RIF1,DPPA4
GO: Biological Process	GO:0048667	cell morphogenesis involved in neuron differentiation		6.207e-07	0.005232	0.0001744	0.001677	77	689	EPHB2,MAP1A,MAP1B,MAP2,BCL11A,NRN1,MEF2C,FGFR3,ULK1,FBXO45,CXCL12,SEMA3C,LRRC4C,SKIL,CASK,KLF7,SLIT3,FOXP1,SMO,GAP43,UNC5B,ATP8A2,FSTL4,NCAM1,NDN,GDI1,CNTN6,NRP2,NEFM,NEFL,BMPR1B,SLITRK2,SEMA4A,CNTN4,CACNA1F,NPTX1,NRCAM,NTF3,NTRK2,SEMA5A,PIAS2,TGFB2,OTX2,LINGO1,CDH4,DOK6,NRG1,PDLIM7,FLRT3,PMP22,CHODL,WNT3,BCL11B,KNDC1,DNM3,ULK2,SEMA3E,BOC,LZTS3,DBN1,DCC,DCX,ZEB2,PARP6,STMN1,VANGL2,ABLIM1,EFNB3,LR…
GO: Biological Process	GO:0051960	regulation of nervous system development		7.81e-07	0.006584	0.0002124	0.002043	109	1088	EPHB2,MAP1B,MAP2,BCL11A,MDK,CSMD3,MECP2,MEF2C,RXRG,MEIS1,ATXN1,JAG1,LRRTM4,GPC4,FGF2,FGFR3,ULK1,CXCL12,SEMA3C,CPNE9,SFRP5,LRRC4C,SKIL,ARHGEF15,CASK,SLC25A12,SMO,SNAP25,UNC13A,INPP5J,GPRC5B,SOX5,LHFPL4,GAP43,ATP8A2,FSTL4,RAP1GAP2,GDI1,SOCS2,NEFM,NEFL,SLITRK2,PER2,NF2,SEMA4A,NOS1,CNTN4,NPTX1,ZEB1,NRCAM,NTF3,NTRK2,SEMA5A,PIAS2,TERT,NR2F1,SIRT1,PTPN5,LINGO1,KLK8,HEY2,PRKN,PBX1,CDH4,TP53,IL34,NRG1,ENP…
GO: Biological Process	GO:0098727	maintenance of cell number		9.545e-07	0.008046	0.0002514	0.002418	31	190	NANOG,JAG1,FGF2,FGFR3,FOXO1,DPPA2,FOXP1,SMO,PRDM14,KDM3A,MMP24,LDB1,KDM2B,NODAL,TDGF1,ZSCAN10,PBX1,SAV1,KLF4,PRRX1,POLR2D,POLR2G,POU5F1,PROX1,TRIM8,LBH,SALL4,PIWIL2,VANGL2,RIF1,DPPA4
GO: Biological Process	GO:0048646	anatomical structure formation involved in morphogenesis		1.028e-06	0.008662	0.000258	0.002481	130	1365	EPHB2,RAMP2,RAMP3,RHOJ,NANOG,ACTC1,ACVR2A,MDK,WLS,F3,MECP2,MEF2C,MEIS1,MFGE8,JAG1,FGF2,ULK1,GPNMB,MMP9,CXCL12,FOXO1,TEAD2,SEMA3C,SHROOM3,SFRP5,VASH1,SKIL,HDAC7,AR,SBNO2,MSX1,PLPP3,SNAI2,DCHS1,PRICKLE2,FOXP1,SMO,BECN1,PRDM14,SPARC,UNC5B,ATP8A2,HESX1,NRP2,PROM1,PHLDB1,LDB1,NF2,SYK,KDM2B,C3,SEMA4A,FOXH1,NODAL,NOS1,NPHS1,LIAS,CALB1,NRCAM,CNMD,NSD1,SEMA5A,TDGF1,TERT,SIRT1,ZFPM2,TGFB2,TGFB3,TGFBR1,THBS…
GO: Biological Process	GO:1903508	positive regulation of nucleic acid-templated transcription		1.04e-06	0.008771	0.000258	0.002481	158	1736	DPF1,MRPL12,NANOG,ACTA2,LAGE3,ACVR1B,ACVR2A,MDK,MECP2,MEF2C,MYSM1,RXRG,MEIS1,MEIS2,PARP1,SALL2,ATXN1,JAG1,FGF2,NLRC5,MAD2L2,ZBTB18,FOXO1,TEAD2,MLXIP,IL23A,PIAS1,AR,DNAJC2,SBNO2,CASK,MSX1,KLF7,EPC1,NR5A2,HLTF,UHRF1,FOXP1,SMO,MYBL2,SOX5,KDM3A,SP4,EAPP,SPIB,ZNF423,NPAS3,NDN,RAD54L2,JMY,BMPR1B,VENTX,LDB1,PER2,NFE2L1,NFYC,TAF1,TFB2M,TAF4B,TAF7,FOXH1,TAF12,NODAL,NOS1,NPM1,ZEB1,PIM2,NTF3,AKNA,NSD1,TDGF1…
GO: Biological Process	GO:1902680	positive regulation of RNA biosynthetic process		1.077e-06	0.009078	0.000259	0.002491	158	1737	DPF1,MRPL12,NANOG,ACTA2,LAGE3,ACVR1B,ACVR2A,MDK,MECP2,MEF2C,MYSM1,RXRG,MEIS1,MEIS2,PARP1,SALL2,ATXN1,JAG1,FGF2,NLRC5,MAD2L2,ZBTB18,FOXO1,TEAD2,MLXIP,IL23A,PIAS1,AR,DNAJC2,SBNO2,CASK,MSX1,KLF7,EPC1,NR5A2,HLTF,UHRF1,FOXP1,SMO,MYBL2,SOX5,KDM3A,SP4,EAPP,SPIB,ZNF423,NPAS3,NDN,RAD54L2,JMY,BMPR1B,VENTX,LDB1,PER2,NFE2L1,NFYC,TAF1,TFB2M,TAF4B,TAF7,FOXH1,TAF12,NODAL,NOS1,NPM1,ZEB1,PIM2,NTF3,AKNA,NSD1,TDGF1…
GO: Biological Process	GO:0022603	regulation of anatomical structure morphogenesis		1.116e-06	0.009407	0.000259	0.002491	124	1289	EPHB2,RAMP2,MAP1B,MAP2,RHOJ,NANOG,BCL11A,MDK,F3,MECP2,MEF2C,BRWD3,JAG1,GPC4,FGF2,ULK1,GPNMB,MMP9,ALOX12,CXCL12,SEMA3C,SHROOM3,CPNE9,SFRP5,VASH1,ST6GAL1,LRRC4C,SKIL,HDAC7,AR,CASK,MSX1,RHOH,SNAI2,PRICKLE2,FOXP1,SMO,UNC13A,SPARC,FSTL4,GDI1,NEFM,GJA1,NEFL,PHLDB1,C3,SEMA4A,DNMBP,NODAL,NRCAM,NTRK2,CNMD,SEMA5A,PIAS2,TERT,SIRT1,TNFRSF11B,TGFB2,TGFB3,TGFBR1,THBS1,OTX2,LINGO1,CD44,CD53,HEY2,PRKN,PAX3,CDH4,…
GO: Biological Process	GO:0048699	generation of neurons		1.137e-06	0.009583	0.000259	0.002491	159	1752	EPHB2,MAP1A,MAP1B,MAP2,BCL11A,MDK,NRN1,CSMD3,MECP2,MEF2C,MEIS1,ATXN1,JAG1,TRAPPC4,FGFR3,ULK1,FBXO45,ZBTB18,CXCL12,SEMA3C,CPNE9,LRRC4C,SKIL,TDP2,CASK,KLF7,SLIT3,PRICKLE2,FOXP1,SMO,TMEM108,SNAP25,TBC1D23,BECN1,UNC13A,INPP5J,GPRC5B,GABRA5,SOX5,GAP43,UNC5B,ATP8A2,FSTL4,RAP1GAP2,NCAM1,NDN,GDI1,CNTN6,NRP2,SOCS2,NEFM,GJA1,PROM1,NEFL,ALKBH1,BMPR1B,SLITRK2,LDB1,PER2,NF2,NFE2L1,C3,DCLK2,SEMA4A,NOS1,DAGLB,G…
GO: Biological Process	GO:0045893	positive regulation of transcription, DNA-templated		1.222e-06	0.0103	0.0002711	0.002607	151	1647	DPF1,MRPL12,NANOG,ACTA2,LAGE3,ACVR1B,ACVR2A,MDK,MECP2,MEF2C,MYSM1,RXRG,MEIS1,MEIS2,PARP1,SALL2,ATXN1,JAG1,FGF2,NLRC5,MAD2L2,ZBTB18,FOXO1,TEAD2,MLXIP,IL23A,PIAS1,AR,DNAJC2,SBNO2,CASK,MSX1,KLF7,EPC1,NR5A2,HLTF,UHRF1,FOXP1,SMO,MYBL2,SOX5,KDM3A,EAPP,SPIB,ZNF423,NPAS3,NDN,RAD54L2,BMPR1B,VENTX,LDB1,NFE2L1,NFYC,TAF1,TFB2M,TAF4B,TAF7,FOXH1,NODAL,NOS1,NPM1,ZEB1,PIM2,NTF3,AKNA,NSD1,TDGF1,PIAS2,TERT,NR2F1,S…
GO: Biological Process	GO:0000902	cell morphogenesis		1.441e-06	0.01215	0.0003116	0.002996	115	1179	EPHB2,MAP1A,MAP1B,MAP2,RHOJ,BCL11A,MDK,NRN1,MECP2,MEF2C,BRWD3,FAT1,FGFR3,ULK1,FBXO45,CXCL12,SEMA3C,SHROOM3,CPNE9,ST6GAL1,LRRC4C,SKIL,AR,CASK,MSX1,RHOH,KLF7,SLIT3,FOXP1,SMO,TMEM108,EGFLAM,PRDM14,UNC13A,NES,SPARC,GAP43,UNC5B,ATP8A2,FSTL4,NCAM1,NDN,GDI1,CNTN6,NRP2,NEFM,GJA1,NEFL,BMPR1B,SLITRK2,SEMA4A,DNMBP,NODAL,GPM6A,CNTN4,CACNA1F,NPTX1,NRCAM,NTF3,NTRK2,CNMD,SEMA5A,PIAS2,TGFB2,OTX2,LINGO1,CD44,KLK8…
GO: Biological Process	GO:0007389	pattern specification process		1.493e-06	0.01259	0.0003147	0.003026	59	493	NANOG,ACVR1B,ACVR2A,WLS,MEF2C,FGF2,FST,BICC1,SEMA3C,SHROOM3,AR,MSX1,LEFTY1,DYNC2LI1,CXXC4,DCHS1,SMO,NRP2,GJA1,BMPR1B,LDB1,KDM2B,C3,FOXH1,NODAL,ZEB1,TDGF1,TDGF1P3,NR2F1,TGFBR1,OTX2,HEY2,PAX3,PBX1,DISP1,TP53,LRRC6,OVOL2,HOXA3,HOXB3,KDM6A,WNT3,POU5F1,ACVR1C,ZIC1,NKD1,NEK8,NDRG4,ZBTB16,PSEN2,ZEB2,FZD5,CDON,RFX4,VANGL2,ALX1,LRP4,TSHZ1,LEF1
GO: Biological Process	GO:0050770	regulation of axonogenesis		1.765e-06	0.01488	0.000363	0.003491	33	215	EPHB2,MAP1B,MAP2,BCL11A,ULK1,CXCL12,SEMA3C,LRRC4C,SKIL,FSTL4,GDI1,NEFM,NEFL,SEMA4A,NRCAM,NTRK2,SEMA5A,LINGO1,CDH4,NRG1,CHODL,WNT3,ULK2,SEMA3E,DBN1,DCC,DCX,ZEB2,EFNB3,LRP4,RND2,EPHA4,EPHA7
GO: Biological Process	GO:0031175	neuron projection development		2.231e-06	0.01881	0.0004369	0.004201	112	1151	EPHB2,MAP1A,MAP1B,MAP2,BCL11A,MDK,NRN1,CSMD3,MECP2,MEF2C,TRAPPC4,FGFR3,ULK1,FBXO45,CXCL12,SEMA3C,CPNE9,LRRC4C,SKIL,CASK,KLF7,SLIT3,PRICKLE2,FOXP1,SMO,TMEM108,SNAP25,TBC1D23,UNC13A,INPP5J,GPRC5B,GAP43,UNC5B,ATP8A2,FSTL4,RAP1GAP2,NCAM1,NDN,GDI1,CNTN6,NRP2,NEFM,GJA1,NEFL,ALKBH1,BMPR1B,SLITRK2,SEMA4A,GPM6A,CNTN4,CACNA1F,NPTX1,NRCAM,NTF3,NTRK2,SEMA5A,PIAS2,NR2F1,SIRT1,PTPN5,TGFB2,OTX2,LINGO1,CD44,KLK8…
GO: Biological Process	GO:0022008	neurogenesis		2.239e-06	0.01887	0.0004369	0.004201	166	1867	EPHB2,MAP1A,MAP1B,APCDD1,MAP2,BCL11A,MDK,NRN1,CSMD3,MECP2,MEF2C,MEIS1,ATXN1,JAG1,FGF2,TRAPPC4,FGFR3,ULK1,FBXO45,ZBTB18,CXCL12,SEMA3C,CPNE9,LRRC4C,SKIL,TDP2,CASK,KLF7,PLPP3,SLIT3,DCHS1,PRICKLE2,FOXP1,SMO,TMEM108,SNAP25,TBC1D23,BECN1,UNC13A,INPP5J,GPRC5B,GABRA5,SOX5,GAP43,UNC5B,ATP8A2,FSTL4,RAP1GAP2,NCAM1,NDN,GDI1,CNTN6,NRP2,SOCS2,NEFM,GJA1,PROM1,NEFL,MMP24,ALKBH1,BMPR1B,SLITRK2,LDB1,PER2,NF2,NFE2L…
GO: Biological Process	GO:0000904	cell morphogenesis involved in differentiation		2.325e-06	0.0196	0.0004369	0.004201	90	873	EPHB2,MAP1A,MAP1B,MAP2,BCL11A,MDK,NRN1,MEF2C,FAT1,FGFR3,ULK1,FBXO45,CXCL12,SEMA3C,ST6GAL1,LRRC4C,SKIL,AR,CASK,KLF7,SLIT3,FOXP1,SMO,EGFLAM,GAP43,UNC5B,ATP8A2,FSTL4,NCAM1,NDN,GDI1,CNTN6,NRP2,NEFM,NEFL,BMPR1B,SLITRK2,SEMA4A,NODAL,CNTN4,CACNA1F,NPTX1,NRCAM,NTF3,NTRK2,CNMD,SEMA5A,PIAS2,TGFB2,OTX2,LINGO1,CDH4,DOK6,NRG1,PDLIM7,ENPP2,PARVB,FLRT3,PMP22,COL6A3,COL12A1,CHODL,WNT3,BCL11B,KNDC1,DNM3,ULK2,SEMA…
GO: Biological Process	GO:0048588	developmental cell growth		2.332e-06	0.01966	0.0004369	0.004201	39	279	MAP1B,MAP2,BCL11A,NRN1,MECP2,ULK1,CXCL12,SEMA3C,CPNE9,SLC25A4,SLIT3,FOXP1,SMO,TMEM108,UNC13A,FSTL4,NDN,GDI1,NRP2,SEMA4A,NRCAM,SEMA5A,SIRT1,PRKN,CDH4,NRG1,FLRT3,WNT3,ULK2,SEMA3E,DBN1,DCC,DCX,ZEB2,RGS2,RGS4,GAL,RND2,EPHA7
GO: Biological Process	GO:0032989	cellular component morphogenesis		2.538e-06	0.0214	0.0004652	0.004473	123	1297	EPHB2,MAP1A,MAP1B,MAP2,RHOJ,ACTC1,BCL11A,MDK,NRN1,MECP2,MEF2C,BRWD3,FAT1,FGFR3,ULK1,FBXO45,CXCL12,SEMA3C,SHROOM3,CPNE9,ST6GAL1,LRRC4C,SKIL,AR,CASK,MSX1,RHOH,KLF7,SLIT3,FOXP1,SMO,TMEM108,EGFLAM,PRDM14,UNC13A,NES,SPARC,GAP43,UNC5B,ATP8A2,FSTL4,NCAM1,NDN,BCL2L1,GDI1,CNTN6,NRP2,NEFM,GJA1,NEFL,BMPR1B,PHLDB1,SLITRK2,SEMA4A,DNMBP,NODAL,GPM6A,CNTN4,CACNA1F,NPTX1,NRCAM,NTF3,NTRK2,CNMD,SEMA5A,PIAS2,TGFB2,O…
GO: Biological Process	GO:0030182	neuron differentiation		2.965e-06	0.02499	0.0005318	0.005114	144	1579	EPHB2,MAP1A,MAP1B,MAP2,BCL11A,MDK,NRN1,CSMD3,MECP2,MEF2C,MEIS1,JAG1,TRAPPC4,FGFR3,ULK1,FBXO45,ZBTB18,CXCL12,SEMA3C,CPNE9,LRRC4C,SKIL,TDP2,CASK,KLF7,SLIT3,PRICKLE2,FOXP1,SMO,TMEM108,SNAP25,TBC1D23,BECN1,UNC13A,INPP5J,GPRC5B,GABRA5,SOX5,GAP43,UNC5B,ATP8A2,FSTL4,RAP1GAP2,NCAM1,NDN,GDI1,CNTN6,NRP2,SOCS2,NEFM,GJA1,PROM1,NEFL,ALKBH1,BMPR1B,SLITRK2,LDB1,NFE2L1,C3,DCLK2,SEMA4A,GPM6A,CNTN4,CACNA1F,NPTX1,Z…
GO: Biological Process	GO:0050771	negative regulation of axonogenesis		3.75e-06	0.03161	0.0006585	0.006333	17	76	EPHB2,MAP2,BCL11A,ULK1,SEMA3C,FSTL4,GDI1,SEMA4A,SEMA5A,LINGO1,WNT3,ULK2,SEMA3E,DCC,EFNB3,LRP4,EPHA7
GO: Biological Process	GO:0045596	negative regulation of cell differentiation		4.074e-06	0.03434	0.0007008	0.00674	88	860	EPHB2,ABCA1,MAP2,NANOG,BCL11A,MDK,MECP2,MEIS1,MEIS2,FBN1,ZNF608,JAG1,FGFR3,ULK1,MAD2L2,MMP9,MMP11,FST,FOXO1,SEMA3C,SKIL,HDAC7,MSX1,SNAI2,FOXP1,SMO,BBS12,INPP5J,FSTL4,RAP1GAP2,NMRK2,GDI1,LDB1,TMEM131L,SEMA4A,NODAL,CNTN4,ZEB1,SEMA5A,TERT,NR2F1,SIRT1,ZFPM2,TGFB2,TGFBR1,LINGO1,CD44,KLK8,HEY2,PBX1,TP53,NRG1,HMGB3,OVOL2,HPN,NR1H2,HSPA9,PMP22,COL3A1,COL5A1,COL5A2,WNT3,XDH,POU5F1,DNM3,ULK2,SEMA3E,ZBTB16,…
GO: Biological Process	GO:0060485	mesenchyme development		6.242e-06	0.05262	0.001052	0.01012	41	312	AMER1,ACTA2,ACTC1,MDK,MEF2C,JAG1,MAD2L2,TEAD2,SEMA3C,DPPA2,MSX1,SNAI2,DCHS1,SMO,GCNT2,NRP2,GJA1,PHLDB1,SEMA4A,FOXH1,NODAL,AKNA,SEMA5A,ZFPM2,TGFB2,TGFB3,TGFBR1,THBS1,HEY2,PAX3,NRG1,OVOL2,HPN,SEMA3E,BNC2,ZEB2,VANGL2,ALX1,DPPA4,LEF1,EPHA3
GO: Biological Process	GO:0048666	neuron development		7.034e-06	0.05929	0.001151	0.01107	121	1298	EPHB2,MAP1A,MAP1B,MAP2,BCL11A,MDK,NRN1,CSMD3,MECP2,MEF2C,TRAPPC4,FGFR3,ULK1,FBXO45,ZBTB18,CXCL12,SEMA3C,CPNE9,LRRC4C,SKIL,TDP2,CASK,KLF7,SLIT3,PRICKLE2,FOXP1,SMO,TMEM108,SNAP25,TBC1D23,BECN1,UNC13A,INPP5J,GPRC5B,GABRA5,GAP43,UNC5B,ATP8A2,FSTL4,RAP1GAP2,NCAM1,NDN,GDI1,CNTN6,NRP2,NEFM,GJA1,NEFL,ALKBH1,BMPR1B,SLITRK2,C3,DCLK2,SEMA4A,GPM6A,CNTN4,CACNA1F,NPTX1,NRCAM,NTF3,NTRK2,SEMA5A,PIAS2,NR2F1,SIRT1…
GO: Biological Process	GO:2000113	negative regulation of cellular macromolecule biosynthetic process		7.101e-06	0.05986	0.001151	0.01107	144	1605	DPF1,ZNF93,NANOG,ZFP57,ETV3,BCL11A,MECP2,MEF2C,ZNF568,MEIS2,STN1,PARP1,SALL2,FBP1,ZNF608,ATXN1,ZNF589,FGFR3,MAD2L2,FST,ZBTB18,PIF1,FOXO1,TRAF7,KLF11,ZNF674,BEND3,ZNF397,SKIL,ERN2,PIAS1,HDAC7,AR,LARP7,DNAJC2,SBNO2,TXNIP,MSX1,LEFTY1,KLF7,TAGLN3,EPC1,EIF4EBP3,SNAI2,UHRF1,FOXP1,SMO,PRDM14,SOX5,UIMC1,EAPP,ZNF423,BCL7A,GFPT1,HESX1,GJA1,PASK,VENTX,LDB1,PER3,PER2,KDM2B,TAF1,TAF7,FOXH1,NODAL,CBX2,ZEB1,ZNF…
GO: Biological Process	GO:0071280	cellular response to copper ion		8.796e-06	0.07415	0.001399	0.01345	10	30	MT1B,MT1E,MT1G,MT1H,MT1M,MT1X,BECN1,MT1HL1,NFE2L1,BACE1
GO: Biological Process	GO:0035019	somatic stem cell population maintenance		9.347e-06	0.07879	0.001459	0.01403	17	81	NANOG,FGF2,FGFR3,FOXP1,PRDM14,LDB1,TDGF1,ZSCAN10,PBX1,KLF4,POLR2D,POLR2G,POU5F1,LBH,SALL4,VANGL2,DPPA4
GO: Biological Process	GO:0035239	tube morphogenesis		9.547e-06	0.08048	0.001463	0.01407	101	1045	EPHB2,RAMP2,RAMP3,RHOJ,MDK,F3,MECP2,MEF2C,MEIS1,MFGE8,JAG1,FGF2,FGFR3,GPNMB,MMP9,ALOX12,CXCL12,TEAD2,SHROOM3,SFRP5,VASH1,HDAC7,AR,DCHS1,FOXP1,SMO,BECN1,SPARC,UNC5B,HESX1,NRP2,GJA1,SGPL1,ADAMTS16,SYK,KDM2B,C3,SEMA4A,FOXH1,NODAL,LIAS,ZEB1,NRCAM,NTRK2,CNMD,SEMA5A,TDGF1,TERT,SIRT1,ZFPM2,TGFB2,TGFBR1,THBS1,CD44,HEY2,PAX3,PBX1,HK2,PDGFRA,ENPP2,APELA,KLF4,OVOL2,HOXA3,HOXB3,CTHRC1,KDM6A,VDR,COL3A1,PRRX1,…
GO: Biological Process	GO:0060560	developmental growth involved in morphogenesis		1.02e-05	0.08599	0.001536	0.01477	37	275	MAP1B,MAP2,BCL11A,NRN1,MECP2,ULK1,CXCL12,SEMA3C,CPNE9,SFRP5,SLIT3,SMO,TMEM108,UNC13A,FSTL4,NDN,GDI1,NRP2,SEMA4A,NRCAM,SEMA5A,PRKN,CDH4,NRG1,FLRT3,WNT3,NKD1,ULK2,SEMA3E,DBN1,DCC,DCX,ZEB2,VANGL2,GAL,RND2,EPHA7
GO: Biological Process	GO:0072359	circulatory system development		1.074e-05	0.09053	0.001588	0.01527	122	1323	EPHB2,GGNBP2,RAMP2,RAMP3,RHOJ,MB,ACTA2,ACTC1,MDK,F3,MECP2,MEF2C,MEIS1,RYR1,MFGE8,FBN1,JAG1,FGF2,GPNMB,MMP9,BICC1,CXCL12,FOXO1,TEAD2,SEMA3C,SLC25A4,VASH1,HDAC7,ARHGEF15,MSX1,LEFTY1,PLPP3,SLIT3,EPC1,SNAI2,DCHS1,FOXP1,SMO,BECN1,SPARC,UNC5B,NCAM1,NRP2,GJA1,GJA4,SGPL1,SYK,C3,SEMA4A,FOXH1,NODAL,NRCAM,NTRK2,CNMD,SEMA5A,TDGF1,TDGF1P3,NXN,TERT,SIRT1,ZFPM2,TGFB2,TGFB3,TGFBR1,THBS1,HEY2,PAX3,TP53,NRG1,HK2,P…
GO: Biological Process	GO:0070848	response to growth factor		1.104e-05	0.09308	0.001605	0.01543	81	794	RAMP2,MAP1B,NANOG,ACVR1B,ACVR2A,MEF2C,MEIS2,PARP1,FBN1,FGF2,FGFR3,ULK1,FST,SFRP5,SKIL,CASK,MSX1,LEFTY1,MT1G,SNAI2,TMEM108,BECN1,PRDM14,SOX5,SPARC,ZNF423,NDN,GCNT2,NRP2,BMPR1B,FOXH1,NODAL,NOS1,ZEB1,NTF3,NTRK2,CNMD,KCP,TDGF1,TDGF1P3,SIRT1,OPRD1,TGFB2,TGFB3,LEFTY2,TGFBR1,THBS1,PTP4A3,OTX2,CD44,TP53,PDGFRA,PENK,KLF4,OVOL2,ZFYVE9,FLRT3,VCAM1,COL1A2,COL2A1,COL3A1,VIL1,MXRA5,HTR3A,HYAL1,POLR2D,POLR2G,XD…
GO: Biological Process	GO:0051093	negative regulation of developmental process		1.194e-05	0.1006	0.001684	0.01619	112	1194	EPHB2,ABCA1,MAP2,NANOG,BCL11A,MDK,MECP2,MEIS1,MEIS2,FBN1,ZNF608,JAG1,FGFR3,ULK1,MAD2L2,MMP9,MMP11,FST,FOXO1,SEMA3C,SFRP5,VASH1,SKIL,HDAC7,ARHGEF15,MSX1,KLF7,SNAI2,FOXP1,SMO,BBS12,INPP5J,SPARC,FSTL4,RAP1GAP2,BBS2,NMRK2,GDI1,SOCS2,GJA1,LDB1,TMEM131L,SEMA4A,NODAL,CNTN4,ZEB1,CNMD,SEMA5A,TERT,NR2F1,SIRT1,TNFRSF11B,ZFPM2,TGFB2,TGFBR1,THBS1,LINGO1,CD44,KLK8,HEY2,PRKN,PBX1,TP53,NRG1,SAV1,HMGB3,KLF4,OVOL2…
GO: Biological Process	GO:0008285	negative regulation of cell population proliferation		1.213e-05	0.1023	0.001684	0.01619	86	859	GGNBP2,ETV3,NDRG2,MEF2C,MEIS1,FABP6,ADORA2B,FGF2,FGFR3,SRPX,GPNMB,MMP9,ALOX15B,KLF11,SFRP5,VASH1,IFITM1,AR,CASK,MSX1,SLIT3,SNAI2,BECN1,SPARC,ATP8A2,NDN,GJA1,BMPR1B,PER2,NF2,BTK,KDM2B,TMEM131L,NODAL,NOS1,NPM1,ZEB1,PIM2,CNMD,ADAMTS8,TERT,ZNF503,TGFB2,TGFB3,DNAJA3,TGFBR1,ZBTB49,THBS1,TNFRSF8,CD44,TP53,CDKN2D,SAV1,KLF4,FOXA3,HNF4A,OVOL2,HPN,PMAIP1,VDR,PMP22,WARS1,XDH,ACVR1C,BCL11B,NDRG4,CXADR,PROX1,C…
GO: Biological Process	GO:0007517	muscle organ development		1.218e-05	0.1027	0.001684	0.01619	55	480	MBNL1,ACTC1,MEF2C,MEIS1,RYR1,FGF2,FHL1,ZBTB18,ITGA11,SLC25A4,SKIL,HDAC7,MSX1,FOXP1,SMO,NCAM1,GJA1,FOXH1,NPHS1,SIRT1,ZFPM2,TGFB2,TGFBR1,GPCPD1,HEY2,PAX3,DISP1,NRG1,SAV1,MYOZ1,PLAGL1,MYMX,CNTFR,PMP22,COL3A1,COL6A3,COL11A1,CHODL,CCM2L,UNC45B,CXADR,PROX1,BOC,MTSS1,DCN,CDON,AKIRIN1,FOXP2,TSC22D3,RGS2,RGS4,VANGL2,KMT5B,LEF1,EPHB1
GO: Biological Process	GO:0120035	regulation of plasma membrane bounded cell projection organization		1.26e-05	0.1062	0.001696	0.01631	83	822	EPHB2,MAP1B,MAP2,BCL11A,MDK,CSMD3,MECP2,MEF2C,TBC1D16,ULK1,CXCL12,SEMA3C,CPNE9,LRRC4C,SKIL,CASK,DYNC2LI1,SNAP25,FSCN1,UNC13A,INPP5J,GPRC5B,GAP43,ATP8A2,FSTL4,RAP1GAP2,GDI1,NEFM,NEFL,ADAMTS16,SEMA4A,GPM6A,CARMIL2,NRCAM,NTRK2,SEMA5A,PIAS2,NR2F1,SIRT1,PTPN5,TGFB3,TGFBR1,LINGO1,ATG3,CD44,KLK8,PRKN,CDH4,NRG1,ENPP2,KLF4,HNF4A,NEGR1,PMP22,VIL1,PRRX1,CHODL,WNT3,PPP2R5B,CEP135,KNDC1,DNM3,ULK2,NDRG4,SEMA3E…
GO: Biological Process	GO:0030030	cell projection organization		1.287e-05	0.1085	0.001696	0.01631	159	1828	EPHB2,MAP1A,MAP1B,MAP2,RHOJ,CCNO,BCL11A,MDK,NRN1,CSMD3,MECP2,MEF2C,TBC1D16,GFY,TUBB4A,WDR35,TRAPPC4,FGFR3,ULK1,FBXO45,CXCL12,SEMA3C,CPNE9,LRRC4C,SKIL,ERN2,CEP164,CASK,KLF7,DYNC2LI1,SLIT3,PRICKLE2,FOXP1,SMO,TMEM108,SNAP25,TBC1D23,FSCN1,BBC3,BBS12,UNC13A,INPP5J,GPRC5B,NES,GAP43,UNC5B,ATP8A2,FSTL4,RAP1GAP2,BBS2,NCAM1,NDN,BCL2L1,GDI1,CNTN6,NRP2,NEFM,GJA1,NEFL,ALKBH1,BMPR1B,SLITRK2,ADAMTS16,AIFM3,SEMA…
GO: Biological Process	GO:0030199	collagen fibril organization		1.295e-05	0.1092	0.001696	0.01631	14	59	MMP11,SERPINH1,TGFB2,TGFBR1,P4HA1,COL1A2,COL2A1,COL3A1,COL5A1,COL5A2,COL11A1,COL12A1,CYP1B1,LUM
GO: Biological Process	GO:0051254	positive regulation of RNA metabolic process		1.326e-05	0.1118	0.001696	0.01631	159	1829	DPF1,MRPL12,NANOG,ACTA2,LAGE3,ACVR1B,ACVR2A,MDK,MECP2,MEF2C,MYSM1,RXRG,MEIS1,MEIS2,PARP1,SALL2,ATXN1,JAG1,FGF2,NLRC5,MAD2L2,ZBTB18,FOXO1,TEAD2,MLXIP,IL23A,PIAS1,AR,DNAJC2,SBNO2,CASK,MSX1,KLF7,EPC1,NR5A2,HLTF,UHRF1,FOXP1,SMO,MYBL2,SOX5,KDM3A,SP4,EAPP,SPIB,ZNF423,NPAS3,NDN,RAD54L2,JMY,BMPR1B,VENTX,LDB1,PER2,NFE2L1,NFYC,TAF1,TFB2M,TAF4B,TAF7,FOXH1,TAF12,NODAL,NOS1,NPM1,ZEB1,PIM2,NTF3,AKNA,NSD1,TDGF1…
GO: Biological Process	GO:0035295	tube development		1.328e-05	0.1119	0.001696	0.01631	118	1276	EPHB2,RAMP2,RAMP3,RHOJ,MDK,F3,MECP2,MEF2C,MEIS1,MFGE8,SALL2,ATXN1,JAG1,FGF2,FGFR3,GPNMB,MMP9,ALOX12,CXCL12,TEAD2,SEMA3C,SHROOM3,SFRP5,DPPA2,VASH1,HDAC7,AR,DCHS1,FOXP1,SMO,BECN1,SPARC,UNC5B,HESX1,NRP2,GJA1,PROM1,GJB5,SGPL1,ADAMTS16,SYK,KDM2B,C3,SEMA4A,FOXH1,NODAL,LIAS,ZEB1,CALB1,NRCAM,NTRK2,CNMD,SEMA5A,TDGF1,TERT,SIRT1,ZFPM2,TGFB2,TGFB3,TGFBR1,THBS1,CD44,HEY2,PAX3,PBX1,HK2,PDGFRA,ENPP2,SAV1,APELA,…
GO: Biological Process	GO:0120036	plasma membrane bounded cell projection organization		1.412e-05	0.1191	0.001777	0.01709	156	1790	EPHB2,MAP1A,MAP1B,MAP2,CCNO,BCL11A,MDK,NRN1,CSMD3,MECP2,MEF2C,TBC1D16,GFY,TUBB4A,WDR35,TRAPPC4,FGFR3,ULK1,FBXO45,CXCL12,SEMA3C,CPNE9,LRRC4C,SKIL,ERN2,CEP164,CASK,KLF7,DYNC2LI1,SLIT3,PRICKLE2,FOXP1,SMO,TMEM108,SNAP25,TBC1D23,FSCN1,BBC3,BBS12,UNC13A,INPP5J,GPRC5B,GAP43,UNC5B,ATP8A2,FSTL4,RAP1GAP2,BBS2,NCAM1,NDN,BCL2L1,GDI1,CNTN6,NRP2,NEFM,GJA1,NEFL,ALKBH1,BMPR1B,SLITRK2,ADAMTS16,AIFM3,SEMA4A,GPM6A,…
GO: Biological Process	GO:0071363	cellular response to growth factor stimulus		1.492e-05	0.1257	0.001843	0.01773	78	763	RAMP2,MAP1B,NANOG,ACVR1B,ACVR2A,MEF2C,PARP1,FBN1,FGF2,FGFR3,ULK1,FST,SFRP5,SKIL,CASK,MSX1,LEFTY1,MT1G,SNAI2,TMEM108,BECN1,PRDM14,SOX5,SPARC,ZNF423,NDN,GCNT2,NRP2,BMPR1B,FOXH1,NODAL,NOS1,ZEB1,NTF3,NTRK2,CNMD,KCP,TDGF1,TDGF1P3,SIRT1,OPRD1,TGFB2,TGFB3,LEFTY2,TGFBR1,THBS1,PTP4A3,OTX2,CD44,TP53,PDGFRA,PENK,KLF4,OVOL2,ZFYVE9,FLRT3,VCAM1,COL1A2,COL2A1,COL3A1,VIL1,HTR3A,HYAL1,POLR2D,POLR2G,XDH,POU5F1,ACV…
GO: Biological Process	GO:0010977	negative regulation of neuron projection development		1.517e-05	0.1278	0.001843	0.01773	28	186	EPHB2,MAP2,BCL11A,MECP2,ULK1,SEMA3C,INPP5J,FSTL4,RAP1GAP2,GDI1,SEMA4A,SEMA5A,NR2F1,LINGO1,KLK8,PMP22,WNT3,DNM3,ULK2,SEMA3E,DCC,LRIG2,LPAR1,EFNB3,LRP4,EPHA3,EPHA4,EPHA7
GO: Biological Process	GO:0010273	detoxification of copper ion		1.574e-05	0.1327	0.001843	0.01773	7	15	MT1B,MT1E,MT1G,MT1H,MT1M,MT1X,MT1HL1
GO: Biological Process	GO:0031915	positive regulation of synaptic plasticity		1.574e-05	0.1327	0.001843	0.01773	7	15	EPHB2,MAP1B,MECP2,MMP9,SNAP25,UNC13A,DBN1
GO: Biological Process	GO:1990169	stress response to copper ion		1.574e-05	0.1327	0.001843	0.01773	7	15	MT1B,MT1E,MT1G,MT1H,MT1M,MT1X,MT1HL1
GO: Biological Process	GO:1990138	neuron projection extension		1.663e-05	0.1402	0.001921	0.01847	29	197	MAP1B,MAP2,BCL11A,NRN1,MECP2,ULK1,CXCL12,SEMA3C,CPNE9,SLIT3,SMO,TMEM108,UNC13A,FSTL4,NDN,GDI1,NRP2,SEMA4A,NRCAM,SEMA5A,PRKN,CDH4,NRG1,FLRT3,WNT3,ULK2,SEMA3E,DBN1,DCX
GO: Biological Process	GO:0048670	regulation of collateral sprouting		1.76e-05	0.1484	0.002005	0.01928	9	26	BCL11A,ULK1,FSTL4,WNT3,ULK2,DCC,DCX,RND2,EPHA7
GO: Biological Process	GO:0031344	regulation of cell projection organization		1.961e-05	0.1653	0.002179	0.02096	83	832	EPHB2,MAP1B,MAP2,BCL11A,MDK,CSMD3,MECP2,MEF2C,TBC1D16,ULK1,CXCL12,SEMA3C,CPNE9,LRRC4C,SKIL,CASK,DYNC2LI1,SNAP25,FSCN1,UNC13A,INPP5J,GPRC5B,GAP43,ATP8A2,FSTL4,RAP1GAP2,GDI1,NEFM,NEFL,ADAMTS16,SEMA4A,GPM6A,CARMIL2,NRCAM,NTRK2,SEMA5A,PIAS2,NR2F1,SIRT1,PTPN5,TGFB3,TGFBR1,LINGO1,ATG3,CD44,KLK8,PRKN,CDH4,NRG1,ENPP2,KLF4,HNF4A,NEGR1,PMP22,VIL1,PRRX1,CHODL,WNT3,PPP2R5B,CEP135,KNDC1,DNM3,ULK2,NDRG4,SEMA3E…
GO: Biological Process	GO:0003007	heart morphogenesis		1.965e-05	0.1656	0.002179	0.02096	38	294	ACTC1,MEF2C,RYR1,JAG1,TEAD2,SEMA3C,MSX1,LEFTY1,SLIT3,SNAI2,DCHS1,SMO,NRP2,GJA1,FOXH1,NODAL,ZFPM2,TGFB2,TGFB3,TGFBR1,THBS1,HEY2,TP53,NRG1,SAV1,OVOL2,KDM6A,COL2A1,COL5A1,COL11A1,CPE,POU5F1,CCM2L,NDRG4,PROX1,FAT4,RARB,VANGL2
GO: Biological Process	GO:0031327	negative regulation of cellular biosynthetic process		2.026e-05	0.1708	0.002218	0.02133	153	1761	DPF1,ZNF93,NANOG,ZFP57,ETV3,BCL11A,TRIM22,MECP2,MEF2C,ZNF568,MEIS2,STN1,PARP1,SALL2,FBP1,ZNF608,ATXN1,ZNF589,WDR35,FGFR3,MAD2L2,FST,ZBTB18,PIF1,FOXO1,TRAF7,KLF11,ZNF674,BEND3,ZNF397,APOC1,SKIL,ERN2,PIAS1,HDAC7,AR,TDP2,LARP7,DNAJC2,SBNO2,TXNIP,MSX1,LEFTY1,KLF7,TAGLN3,EPC1,EIF4EBP3,SNAI2,UHRF1,FOXP1,SMO,PRDM14,SOX5,UIMC1,EAPP,ZNF423,BCL7A,GFPT1,HESX1,GJA1,PASK,VENTX,LDB1,PER3,PER2,KDM2B,TAF1,TAF7,F…
GO: Biological Process	GO:0043523	regulation of neuron apoptotic process		2.256e-05	0.1902	0.002438	0.02345	36	274	MDK,MECP2,MEF2C,PARP1,FGFR3,HYOU1,SMO,SNCB,BBC3,MYBL2,GABRA5,NES,UNC5B,BCL2L1,NEFL,ALKBH1,KDM2B,NQO2,NOS1,NPM1,TRIM2,NTF3,NTRK2,GRM4,TERT,SIRT1,TGFB2,TGFB3,PRKN,TP53,BACE1,PMAIP1,CNTFR,PCSK9,BCL2L11,EPHA7
GO: Biological Process	GO:0010558	negative regulation of macromolecule biosynthetic process		2.531e-05	0.2134	0.002698	0.02595	148	1700	DPF1,ZNF93,NANOG,ZFP57,ETV3,BCL11A,TRIM22,MECP2,MEF2C,ZNF568,MEIS2,STN1,PARP1,SALL2,FBP1,ZNF608,ATXN1,ZNF589,FGFR3,MAD2L2,FST,ZBTB18,PIF1,FOXO1,TRAF7,KLF11,ZNF674,BEND3,ZNF397,SKIL,ERN2,PIAS1,HDAC7,AR,TDP2,LARP7,DNAJC2,SBNO2,TXNIP,MSX1,LEFTY1,KLF7,TAGLN3,EPC1,EIF4EBP3,SNAI2,UHRF1,FOXP1,SMO,PRDM14,SOX5,UIMC1,EAPP,ZNF423,BCL7A,GFPT1,HESX1,GJA1,PASK,VENTX,LDB1,PER3,PER2,KDM2B,TAF1,TAF7,FOXH1,NODAL,C…
GO: Biological Process	GO:0030198	extracellular matrix organization		2.561e-05	0.2159	0.002698	0.02595	47	399	A2M,RAMP2,FBLN2,FBN1,FGF2,MMP9,MMP11,ITGA11,CCDC80,EGFLAM,FSCN1,SPARC,MMP24,KIF9,PHLDB1,NPHS1,CARMIL2,CAPG,SEMA5A,SERPINH1,TNFRSF11B,TGFB2,TGFBR1,THBS1,P4HA1,CD44,SERAC1,PDGFRA,HPN,VCAM1,COL1A2,COL2A1,PMP22,COL3A1,COL4A5,COL5A1,COL5A2,COL6A3,COL11A1,COL12A1,VWF,ICAM3,CYP1B1,DCN,PTX3,ELF3,LUM
GO: Biological Process	GO:0009890	negative regulation of biosynthetic process		2.601e-05	0.2193	0.002707	0.02604	155	1797	DPF1,ZNF93,NANOG,ZFP57,ETV3,BCL11A,TRIM22,MECP2,MEF2C,ZNF568,MEIS2,STN1,ADORA2B,PARP1,SALL2,FBP1,ZNF608,ATXN1,ZNF589,WDR35,FGFR3,MAD2L2,FST,ZBTB18,PIF1,FOXO1,TRAF7,KLF11,ZNF674,BEND3,ZNF397,APOC1,SKIL,ERN2,PIAS1,HDAC7,AR,TDP2,LARP7,DNAJC2,SBNO2,TXNIP,MSX1,LEFTY1,KLF7,TAGLN3,EPC1,EIF4EBP3,SNAI2,UHRF1,FOXP1,SMO,PRDM14,SOX5,UIMC1,EAPP,ZNF423,GCHFR,BCL7A,GFPT1,HESX1,GJA1,PASK,VENTX,LDB1,PER3,PER2,KDM…
GO: Biological Process	GO:0010975	regulation of neuron projection development		2.644e-05	0.2229	0.002718	0.02614	65	614	EPHB2,MAP1B,MAP2,BCL11A,MDK,CSMD3,MECP2,MEF2C,ULK1,CXCL12,SEMA3C,CPNE9,LRRC4C,SKIL,CASK,SNAP25,UNC13A,INPP5J,GPRC5B,ATP8A2,FSTL4,RAP1GAP2,GDI1,NEFM,NEFL,SEMA4A,NRCAM,NTRK2,SEMA5A,PIAS2,NR2F1,SIRT1,PTPN5,LINGO1,KLK8,PRKN,CDH4,NRG1,KLF4,NEGR1,PMP22,PRRX1,CHODL,WNT3,PPP2R5B,KNDC1,DNM3,ULK2,NDRG4,SEMA3E,LZTS3,DBN1,DCC,DCX,ZEB2,LRIG2,PARP6,RGS2,LPAR1,EFNB3,LRP4,RND2,EPHA3,EPHA4,EPHA7
GO: Biological Process	GO:0033043	regulation of organelle organization		2.782e-05	0.2345	0.002815	0.02707	125	1391	MAP1A,MAP1B,MAP2,RHOJ,MDK,CCL26,MECP2,MEF2C,STN1,TBC1D16,PARP1,TUBB4A,STX18,WDR35,FGFR3,ULK1,MAD2L2,MMP9,BAIAP2L2,CXCL12,PIF1,USP36,VPS18,DPPA2,ARHGEF15,MSX1,RHOH,DYNC2LI1,PYCARD,SNAI2,LIMCH1,FSCN1,BECN1,BBC3,INPP5J,KDM3A,NES,GAP43,IQGAP2,MYO5A,BCL2L1,JMY,BICD1,KIF9,PHLDB1,VENTX,NF2,NFE2L1,ADAMTS16,GMFB,TAF7,NOS1,NPHS1,NPM1,NPTX1,CARMIL2,NTF3,CAPG,NSD1,SEMA5A,TERF1,TERT,SIRT1,PTPN5,TGFB2,TGFB3,TG…
GO: Biological Process	GO:0051130	positive regulation of cellular component organization		2.805e-05	0.2364	0.002815	0.02707	122	1351	EPHB2,ABCA1,MAP1B,BCL11A,MDK,CCL26,MECP2,PARP1,STX18,LRRTM4,WDR35,ULK1,MMP9,BAIAP2L2,CXCL12,USP36,CPNE9,SKIL,AR,ARHGEF15,CASK,MSX1,PYCARD,SNAI2,LIMCH1,FSCN1,BECN1,BBC3,UNC13A,GPRC5B,NES,IQGAP2,ATP8A2,BCL2L1,GDI1,JMY,BICD1,NEFL,PHLDB1,SLITRK2,NF2,SYK,GMFB,C3,SEMA4A,NOS1,NPHS1,NPM1,GPM6A,CARMIL2,NTF3,NTRK2,CAPG,SEMA5A,TERF1,PIAS2,SIRT1,PTPN5,TGFB2,TGFB3,TGFBR1,KAT7,CD53,PRKN,PARN,CDH4,HCLS1,TP53,NR…
GO: Biological Process	GO:0051241	negative regulation of multicellular organismal process		2.881e-05	0.2428	0.002857	0.02748	133	1500	EPHB2,MAP2,NANOG,BCL11A,MDK,NDRG2,MECP2,MEF2C,MEIS1,MEIS2,ADORA2B,PARP1,FBN1,ZNF608,JAG1,FGF2,NLRC5,FGFR3,ULK1,GPNMB,MAD2L2,MMP9,ALOX12,FOXO1,SEMA3C,SFRP5,VASH1,PYDC1,APOC1,IL23A,HDAC7,ARHGEF15,KLF7,PYCARD,SNAI2,FOXP1,SMO,INPP5J,ARHGAP42,SPARC,ZNF423,FSTL4,RAP1GAP2,BBS2,GDI1,SOCS2,GJA1,LDB1,BTK,TAX1BP1,TMEM131L,SEMA4A,NODAL,NOS1,NOVA1,CNTN4,CALCR,NRDC,CNMD,SEMA5A,TERT,NR2F1,SIRT1,TNFRSF11B,ZFPM2,…
GO: Biological Process	GO:0048668	collateral sprouting		3.047e-05	0.2568	0.002986	0.02872	10	34	BCL11A,ULK1,FSTL4,WNT3,ULK2,DCC,DCX,ZEB2,RND2,EPHA7
GO: Biological Process	GO:0045664	regulation of neuron differentiation		3.118e-05	0.2629	0.003021	0.02906	79	792	EPHB2,MAP1B,MAP2,BCL11A,MDK,CSMD3,MECP2,MEF2C,MEIS1,JAG1,ULK1,CXCL12,SEMA3C,CPNE9,LRRC4C,SKIL,CASK,SNAP25,UNC13A,INPP5J,GPRC5B,SOX5,ATP8A2,FSTL4,RAP1GAP2,GDI1,SOCS2,NEFM,NEFL,SEMA4A,CNTN4,ZEB1,NRCAM,NTF3,NTRK2,SEMA5A,PIAS2,NR2F1,SIRT1,PTPN5,LINGO1,KLK8,HEY2,PRKN,PBX1,CDH4,NRG1,KLF4,NEGR1,PMP22,PRRX1,CHODL,WNT3,PPP2R5B,BCL11B,KNDC1,DNM3,ULK2,NDRG4,SEMA3E,PROX1,BRINP3,LZTS3,DBN1,DCC,DCX,ZEB2,LRIG2,…
GO: Biological Process	GO:0050767	regulation of neurogenesis		3.192e-05	0.2691	0.003039	0.02922	93	972	EPHB2,MAP1B,MAP2,BCL11A,MDK,CSMD3,MECP2,MEF2C,MEIS1,ATXN1,JAG1,FGFR3,ULK1,CXCL12,SEMA3C,CPNE9,LRRC4C,SKIL,CASK,SMO,SNAP25,UNC13A,INPP5J,GPRC5B,SOX5,ATP8A2,FSTL4,RAP1GAP2,GDI1,SOCS2,NEFM,NEFL,PER2,NF2,SEMA4A,NOS1,CNTN4,ZEB1,NRCAM,NTF3,NTRK2,SEMA5A,PIAS2,TERT,NR2F1,SIRT1,PTPN5,LINGO1,KLK8,HEY2,PRKN,PBX1,CDH4,TP53,IL34,NRG1,ENPP2,KLF4,PRUNE1,HOXB3,NEGR1,PMP22,COL3A1,PRRX1,CHODL,WNT3,PPP2R5B,BCL11B,T…
GO: Biological Process	GO:0061061	muscle structure development		3.208e-05	0.2704	0.003039	0.02922	78	780	RAMP2,MBNL1,ACTC1,MECP2,MEF2C,MEIS1,RYR1,JAG1,FGF2,FHL1,ZBTB18,CXCL12,ITGA11,SLC25A4,SKIL,PIAS1,HDAC7,MSX1,EPC1,FOXP1,SMO,NCAM1,NMRK2,GJA1,FOXH1,NOS1,NPHS1,ZEB1,NTF3,TDGF1,SIRT1,ZFPM2,TGFB2,TGFBR1,CD53,GPCPD1,HEY2,CD81,PAX3,OLFM2,TNNT1,DISP1,NRG1,PDGFRA,CACNA2D2,PDLIM7,SAV1,MYOZ1,PLAGL1,MYMX,CNTFR,PMP22,COL3A1,COL6A3,COL11A1,CHODL,IGF2,NKD1,CCM2L,UNC45B,CXADR,PROX1,BOC,MTSS1,DCN,CDON,RARB,AKIRIN1…
GO: Biological Process	GO:0007498	mesoderm development		3.541e-05	0.2985	0.003305	0.03178	34	258	NANOG,ACVR1B,ACVR2A,WLS,MEST,MMP9,TEAD2,PLPP3,SMO,PHLDB1,LDB1,NF2,BTK,FOXH1,NODAL,NSD1,TDGF1,ZFPM2,OTX2,TP53,APELA,KLF4,HNF4A,KDM6A,COL5A1,COL5A2,COL11A1,COL12A1,WNT3,POU5F1,TENM4,MAP2K5,VANGL2,LEF1
GO: Biological Process	GO:0044087	regulation of cellular component biogenesis		3.567e-05	0.3007	0.003305	0.03178	98	1040	EPHB2,ABCA1,MAP1B,MAP2,CCL26,MECP2,MEF2C,TBC1D16,PARP1,TUBB4A,STX18,LRRTM4,GPC4,ULK1,BAIAP2L2,USP36,VPS18,PYDC1,ARHGEF15,DYNC2LI1,PYCARD,SNAI2,LIMCH1,OCLN,FSCN1,BECN1,BBC3,UNC13A,INPP5J,LHFPL4,GAP43,IQGAP2,NCAM1,JMY,GJA1,KIF9,PHLDB1,SLITRK2,LDB1,NF2,ADAMTS16,SYK,GMFB,SEMA4A,NPHS1,NPM1,GPM6A,NPTX1,CARMIL2,NTRK2,CAPG,TERF1,OPRD1,TGFB3,TGFBR1,THBS1,FAM107A,ATG3,PRKN,HCLS1,TP53,SYNPO2,ENPP2,CHGA,HNF4…
GO: Biological Process	GO:0043062	extracellular structure organization		3.65e-05	0.3077	0.003339	0.03211	56	511	A2M,ABCA1,RAMP2,ACSL3,FBLN2,FBN1,FGF2,MMP9,MMP11,ITGA11,CCDC80,APOC1,EGFLAM,FSCN1,SPARC,MMP24,KIF9,PHLDB1,NPHS1,CARMIL2,CAPG,SEMA5A,SERPINH1,TNFRSF11B,TGFB2,TGFBR1,THBS1,P4HA1,CD44,SERAC1,PDGFRA,HPN,PLA2G2A,NR1H2,VCAM1,COL1A2,COL2A1,PMP22,COL3A1,COL4A5,COL5A1,COL5A2,COL6A3,LMF1,COL11A1,COL12A1,VWF,HYAL1,ICAM3,MIR302A,CYP1B1,DCN,PTX3,PCSK9,ELF3,LUM
GO: Biological Process	GO:0007423	sensory organ development		3.683e-05	0.3105	0.003339	0.03211	66	633	EPHB2,RHOJ,MEIS1,MEIS2,FAT1,FBN1,SALL2,JAG1,FGF2,FGFR3,SKIL,ARHGEF15,MSX1,DCHS1,GABRA5,NES,SPARC,ATP8A2,HESX1,GJA1,PROM1,BMPR1B,NF2,KDM2B,GPM6A,CACNA1F,ZEB1,CALB1,NTRK2,CRB1,TGFB2,TGFB3,TGFBR1,OTX2,HEY2,PDGFRA,KLF4,HPN,CTHRC1,COL2A1,COL5A1,COL5A2,PRRX1,COL11A1,ZIC1,CRYBA4,BCL11B,NKD1,UNC45B,PROX1,CYP1B1,BNC2,DCX,ZEB2,FZD5,CDON,FAT4,RARB,BCL2L11,FOXP2,VANGL2,TSHZ1,LEF1,MCOLN3,EPHA4,EPHB1
GO: Biological Process	GO:0009887	animal organ morphogenesis		3.961e-05	0.3339	0.003552	0.03416	113	1241	EPHB2,ACTA2,ACTC1,MDK,MEF2C,MEIS1,RYR1,FAT1,FBN1,JAG1,GPC4,FGF2,FGFR3,FHL1,FST,FOXO1,TEAD2,SEMA3C,SFRP5,AR,MSX1,LEFTY1,SLIT3,NR5A2,SNAI2,DCHS1,PRICKLE2,SMO,EGFLAM,MYO5A,ATP8A2,BBS2,GCNT1,HESX1,NRP2,GJA1,PROM1,BMPR1B,NF2,SGPL1,ADAMTS16,SYK,KDM2B,FOXH1,NODAL,ZEB1,CALB1,NTRK2,SERPINH1,TNFRSF11B,ZFPM2,CRB1,TGFB2,TGFB3,TGFBR1,THBS1,OTX2,CD44,HEY2,PAX3,PBX1,TP53,NRG1,PDGFRA,SAV1,OVOL2,HOXA3,HOXB3,HPN,C…
GO: Biological Process	GO:0048671	negative regulation of collateral sprouting		4.066e-05	0.3428	0.003608	0.0347	6	12	BCL11A,ULK1,FSTL4,ULK2,DCC,EPHA7
GO: Biological Process	GO:0061687	detoxification of inorganic compound		4.255e-05	0.3587	0.003736	0.03593	7	17	MT1B,MT1E,MT1G,MT1H,MT1M,MT1X,MT1HL1
GO: Biological Process	GO:0007610	behavior		4.876e-05	0.4111	0.004238	0.04075	74	739	EPHB2,MAP1A,MDK,MECP2,MEF2C,MEIS1,MEIS2,PARP1,PTCHD1,ATXN1,PPP1R1B,CXCL12,PIAS1,AR,FOXP1,SNAP25,BBS12,GPRC5B,GABRA5,MYO5A,ATP8A2,NPAS3,GATM,BBS2,NCAM1,GIP,GJA1,PER3,GMFB,NQO2,NOS1,NOVA1,CALB1,MCHR1,NTF3,NTRK2,GRIA1,GRM4,GRPR,OPRD1,CCND2,PTPN5,THBS1,KLK8,PRKN,OLFM2,FBXL20,TP53,NRG1,NAPEPLD,PENK,BACE1,NEGR1,CNTFR,PMP22,HTR2C,CPT1A,ZIC1,IGF2,NDRG4,PSEN2,PYY,DACH1,SPIRE1,DBN1,KCND2,DNM1,FOXP2,SEZ6L2,…
GO: Biological Process	GO:0000423	mitophagy		5.009e-05	0.4223	0.004309	0.04144	8	23	ULK1,ATG14,BECN1,PRKN,TP53,TOMM7,ATG13,RNF41
GO: Biological Process	GO:0009792	embryo development ending in birth or egg hatching		5.085e-05	0.4287	0.00433	0.04164	81	829	GGNBP2,MBNL1,ACVR1B,ACVR2A,MEF2C,ZNF568,SALL2,FGF2,ZBTB18,TEAD2,SEMA3C,SHROOM3,SFRP5,VASH1,SKIL,AR,MSX1,NR5A2,DCHS1,PRICKLE2,FOXP1,SMO,PRDM14,SOX5,BCL2L1,GJA1,ALKBH1,GJB5,KDM2B,NODAL,LIAS,SLC25A20,ZEB1,TDGF1,NXN,ZFPM2,TGFB2,TGFB3,TGFBR1,OTX2,HEY2,PAX3,PBX1,TP53,PDGFRA,OVOL2,HOXA3,HOXB3,CTHRC1,DHX35,KDM6A,VCAM1,COL2A1,PRRX1,COL11A1,HUS1,HYAL1,POU5F1,ACVR1C,WDR74,IGF2,NKD1,IPMK,PROX1,MBTD1,ZFP42,PS…
GO: Biological Process	GO:0007411	axon guidance		5.137e-05	0.433	0.00433	0.04164	38	307	EPHB2,CXCL12,SEMA3C,KLF7,SLIT3,FOXP1,SMO,GAP43,UNC5B,NCAM1,CNTN6,NRP2,BMPR1B,SEMA4A,CNTN4,NRCAM,NTF3,SEMA5A,TGFB2,OTX2,CDH4,DOK6,PDLIM7,FLRT3,WNT3,BCL11B,SEMA3E,BOC,DCC,VANGL2,ABLIM1,EFNB3,LGR6,EPHA3,EPHA4,EPHA7,EPHA8,EPHB1
GO: Biological Process	GO:0097485	neuron projection guidance		5.513e-05	0.4647	0.004601	0.04425	38	308	EPHB2,CXCL12,SEMA3C,KLF7,SLIT3,FOXP1,SMO,GAP43,UNC5B,NCAM1,CNTN6,NRP2,BMPR1B,SEMA4A,CNTN4,NRCAM,NTF3,SEMA5A,TGFB2,OTX2,CDH4,DOK6,PDLIM7,FLRT3,WNT3,BCL11B,SEMA3E,BOC,DCC,VANGL2,ABLIM1,EFNB3,LGR6,EPHA3,EPHA4,EPHA7,EPHA8,EPHB1
GO: Biological Process	GO:0014855	striated muscle cell proliferation		6.139e-05	0.5175	0.005074	0.04879	17	93	MEF2C,MEIS1,FGF2,FOXP1,NCAM1,GJA1,SIRT1,ZFPM2,TGFB2,TGFBR1,HEY2,SAV1,TENM4,NDRG4,CXADR,AKIRIN1,EPHB1
GO: Biological Process	GO:0097501	stress response to metal ion		6.585e-05	0.5551	0.005379	0.05173	7	18	MT1B,MT1E,MT1G,MT1H,MT1M,MT1X,MT1HL1
GO: Biological Process	GO:0050808	synapse organization		6.636e-05	0.5594	0.005379	0.05173	54	498	EPHB2,MAP1B,NDRG2,MECP2,MEF2C,LRRTM4,GPC4,FBXO45,MPP2,SORBS1,LRRC4C,ARHGEF15,CASK,TMEM108,SNCB,UNC13A,FILIP1,SPARC,LHFPL4,GAP43,MYO5A,NRP2,NEFL,SLITRK2,C3,SEMA4A,GPM6A,NPTX1,NRCAM,NRDC,NTRK2,DNAJA3,KLK8,PCDHGC3,NRG1,CACNA2D2,FLRT3,PLS3,PMP22,COL4A5,DNM3,SEMA3E,LZTS3,DBN1,TUBA1A,FZD5,DLG3,SEZ6L2,LRP4,PRMT3,EPHA3,EPHA4,EPHA7,EPHB1
GO: Biological Process	GO:0061387	regulation of extent of cell growth		6.757e-05	0.5696	0.005425	0.05217	21	131	MAP1B,MAP2,BCL11A,ULK1,CXCL12,SEMA3C,FSTL4,GDI1,SEMA4A,NRCAM,SEMA5A,CDH4,NRG1,WNT3,ULK2,SEMA3E,DBN1,DCC,DCX,RND2,EPHA7
GO: Biological Process	GO:1901214	regulation of neuron death		7.927e-05	0.6683	0.006304	0.06063	45	394	MDK,MECP2,MEF2C,PARP1,FGFR3,GPNMB,RRAS2,HYOU1,HDAC7,SMO,SNCB,BBC3,MYBL2,GABRA5,NES,UNC5B,BCL2L1,NEFL,ALKBH1,KDM2B,NQO2,NOS1,NPM1,TRIM2,NTF3,NTRK2,GRM4,TERT,SIRT1,PTPN5,TGFB2,TGFB3,PRKN,TP53,CHP1,HLA-F,BACE1,CHGA,PMAIP1,CNTFR,DCC,PCSK9,BCL2L11,EPHA7,EPHB1
GO: Biological Process	GO:0010769	regulation of cell morphogenesis involved in differentiation		8.412e-05	0.7091	0.006627	0.06373	42	360	EPHB2,MAP1B,MAP2,BCL11A,MDK,ULK1,CXCL12,SEMA3C,ST6GAL1,LRRC4C,SKIL,CASK,FSTL4,GDI1,NEFM,NEFL,SEMA4A,NRCAM,NTRK2,SEMA5A,PIAS2,LINGO1,CDH4,NRG1,ENPP2,CHODL,WNT3,KNDC1,DNM3,ULK2,SEMA3E,LZTS3,DBN1,DCC,DCX,ZEB2,PARP6,EFNB3,LRP4,RND2,EPHA4,EPHA7
GO: Biological Process	GO:0019220	regulation of phosphate metabolic process		8.675e-05	0.7313	0.006686	0.0643	166	1994	EPHB2,GGNBP2,RAMP3,ACTA2,PPP1R14A,CCNO,DNAJC27,ACVR1B,ACVR2A,NDRG2,CCL26,MEF2C,ACSL3,ADORA2B,PARP1,SAA1,FBP1,ATXN1,PPP1R1B,FGF2,NLRC5,AK4,FGFR3,GPNMB,MAD2L2,MMP9,FOXO1,TRAF7,SFRP5,ATG14,PYDC1,APOC1,ERN2,IL23A,AR,ARAF,LEFTY1,RHOH,SLC25A12,PLPP3,PYCARD,SMPD1,LIMCH1,INPP5J,GPRC5B,GAP43,PPP2R2D,BARD1,BCL2L1,GCNT2,SOCS2,LDB1,NF2,SYK,CCNA1,GMFB,C3,TAF7,NQO2,NODAL,NOS1,NPM1,CALCR,NTF3,NTRK2,NSD1,TDGF1,G…
GO: Biological Process	GO:0055069	zinc ion homeostasis		8.722e-05	0.7353	0.006686	0.0643	10	38	MT1B,MT1E,MT1G,MT1H,MT1M,MT1X,MT1HL1,PRKN,LCK,SLC39A10
GO: Biological Process	GO:0046676	negative regulation of insulin secretion		8.724e-05	0.7355	0.006686	0.0643	12	53	KLF7,NOS1,PRKN,PDE1C,PDE4C,CHGA,PFKL,VSNL1,ACVR1C,PSMD9,MIDN,SYTL4
GO: Biological Process	GO:0009952	anterior/posterior pattern specification		8.851e-05	0.7461	0.006699	0.06443	31	237	ACVR2A,WLS,SEMA3C,MSX1,SMO,LDB1,KDM2B,FOXH1,NODAL,TDGF1,TDGF1P3,TGFBR1,OTX2,HEY2,PAX3,PBX1,TP53,HOXA3,HOXB3,KDM6A,WNT3,NKD1,ZBTB16,PSEN2,ZEB2,FZD5,CDON,VANGL2,ALX1,TSHZ1,LEF1
GO: Biological Process	GO:0051174	regulation of phosphorus metabolic process		8.901e-05	0.7503	0.006699	0.06443	166	1995	EPHB2,GGNBP2,RAMP3,ACTA2,PPP1R14A,CCNO,DNAJC27,ACVR1B,ACVR2A,NDRG2,CCL26,MEF2C,ACSL3,ADORA2B,PARP1,SAA1,FBP1,ATXN1,PPP1R1B,FGF2,NLRC5,AK4,FGFR3,GPNMB,MAD2L2,MMP9,FOXO1,TRAF7,SFRP5,ATG14,PYDC1,APOC1,ERN2,IL23A,AR,ARAF,LEFTY1,RHOH,SLC25A12,PLPP3,PYCARD,SMPD1,LIMCH1,INPP5J,GPRC5B,GAP43,PPP2R2D,BARD1,BCL2L1,GCNT2,SOCS2,LDB1,NF2,SYK,CCNA1,GMFB,C3,TAF7,NQO2,NODAL,NOS1,NPM1,CALCR,NTF3,NTRK2,NSD1,TDGF1,G…
GO: Biological Process	GO:0043009	chordate embryonic development		9.564e-05	0.8062	0.007135	0.06862	78	806	GGNBP2,MBNL1,ACVR1B,ACVR2A,MEF2C,ZNF568,SALL2,ZBTB18,TEAD2,SEMA3C,SHROOM3,SFRP5,VASH1,SKIL,AR,MSX1,DCHS1,PRICKLE2,FOXP1,SMO,PRDM14,SOX5,BCL2L1,GJA1,ALKBH1,GJB5,KDM2B,NODAL,LIAS,SLC25A20,ZEB1,TDGF1,NXN,ZFPM2,TGFB2,TGFB3,TGFBR1,OTX2,HEY2,PAX3,PBX1,TP53,PDGFRA,OVOL2,HOXA3,HOXB3,CTHRC1,DHX35,KDM6A,VCAM1,COL2A1,PRRX1,COL11A1,HYAL1,POU5F1,ACVR1C,WDR74,IGF2,NKD1,IPMK,PROX1,MBTD1,ZFP42,PSEN2,MTSS1,DBN1,Z…
GO: Biological Process	GO:0008630	intrinsic apoptotic signaling pathway in response to DNA damage		9.759e-05	0.8227	0.007216	0.0694	19	115	CXCL12,USP28,SKIL,PYCARD,SNAI2,BBC3,BCL2L1,SIRT1,MSH6,CD44,TP53,CDKN2D,PMAIP1,CDIP1,AEN,IFI16,ACKR3,BCL2L11,UACA
GO: Biological Process	GO:0003002	regionalization		9.91e-05	0.8354	0.007264	0.06986	44	386	ACVR2A,WLS,MEF2C,FGF2,SEMA3C,AR,MSX1,CXXC4,SMO,NRP2,BMPR1B,LDB1,KDM2B,C3,FOXH1,NODAL,TDGF1,TDGF1P3,NR2F1,TGFBR1,OTX2,HEY2,PAX3,PBX1,DISP1,TP53,OVOL2,HOXA3,HOXB3,KDM6A,WNT3,POU5F1,NKD1,ZBTB16,PSEN2,ZEB2,FZD5,CDON,RFX4,VANGL2,ALX1,LRP4,TSHZ1,LEF1
GO: Biological Process	GO:0048568	embryonic organ development		0.0001009	0.8505	0.007332	0.07051	54	506	EPHB2,GGNBP2,MEF2C,ZNF568,FBN1,TEAD2,VASH1,MSX1,SMO,TBC1D23,NES,ATP8A2,HESX1,GJA1,GJB5,LDB1,KDM2B,FOXH1,NODAL,ZEB1,ZFPM2,TGFB2,TGFB3,TGFBR1,OTX2,HEY2,PBX1,TP53,PDGFRA,APELA,OVOL2,HOXA3,HOXB3,HPN,CTHRC1,KDM6A,VCAM1,COL2A1,COL5A2,PRRX1,COL11A1,HYAL1,ZIC1,IGF2,NDRG4,PROX1,FZD5,RARB,VANGL2,ALX1,RBPMS2,VASH2,TSHZ1,LEF1
GO: Biological Process	GO:0051402	neuron apoptotic process		0.0001047	0.8827	0.007544	0.07255	37	306	MDK,MECP2,MEF2C,PARP1,FGFR3,HYOU1,SMO,SNCB,BBC3,MYBL2,GABRA5,NES,UNC5B,BCL2L1,NEFL,ALKBH1,KDM2B,NQO2,NOS1,NPM1,TRIM2,NTF3,NTRK2,GRM4,TERT,SIRT1,TGFB2,TGFB3,PRKN,TP53,BACE1,PMAIP1,CNTFR,FAM162A,PCSK9,BCL2L11,EPHA7
GO: Biological Process	GO:0045597	positive regulation of cell differentiation		0.0001063	0.8958	0.007592	0.07301	106	1177	EPHB2,RAMP2,MAP1B,BCL11A,ACVR1B,ACVR2A,MDK,MECP2,MEF2C,PARP1,ATXN1,JAG1,FGF2,FGFR3,CXCL12,ALOX15B,SEMA3C,CPNE9,SLC25A4,IFITM1,SKIL,IL23A,PIAS1,AR,CASK,EPC1,SNAI2,SMO,UNC13A,GPRC5B,SOX5,ATP8A2,GCNT2,GDI1,SOCS2,PROM1,NEFL,BMPR1B,NF2,BTK,SYK,ZEB1,CARMIL2,NRCAM,NTF3,NTRK2,NFKBIZ,SEMA5A,PIAS2,TERT,SIRT1,PTPN5,TGFB2,TGFB3,TGFBR1,CD1D,CD53,MEDAG,PRKN,OLFM2,CDH4,HCLS1,TPH1,IL34,NRG1,NAPEPLD,PDLIM7,ENPP2,…
GO: Biological Process	GO:0001501	skeletal system development		0.0001125	0.9484	0.00797	0.07664	60	582	AMER1,ACVR2A,MDK,MEF2C,MEIS1,RYR1,FBN1,FGF2,FGFR3,MMP9,FST,TRIM45,MSX1,SNAI2,DCHS1,FOXP1,SOX5,SPARC,BBS2,GJA1,BMPR1B,SGPL1,NODAL,ZEB1,CNMD,PAPSS2,SERPINH1,TNFRSF11B,TGFB2,TGFB3,TGFBR1,THBS1,PRDX1,CD44,PBX1,TP53,PDGFRA,TRPS1,HOXA3,HOXB3,PLS3,VDR,COL1A2,COL2A1,COL3A1,COL5A2,COL6A3,PRRX1,COL11A1,COL12A1,HYAL1,ZIC1,IGF2,MBTD1,ZBTB16,FAT4,RARB,ADAMTS12,ALX1,LUM
GO: Biological Process	GO:1990830	cellular response to leukemia inhibitory factor		0.0001148	0.9675	0.007996	0.0769	20	126	WDR35,RNF138,SBNO2,CHCHD4,NR5A2,MPC1,MYBL2,KDM3A,NRP2,TRIM2,SIRT1,PTP4A3,OTX2,HK2,KLF4,POU5F1,ZFP42,LRRC2,RNF125,RIF1
GO: Biological Process	GO:1990823	response to leukemia inhibitory factor		0.0001148	0.9675	0.007996	0.0769	20	126	WDR35,RNF138,SBNO2,CHCHD4,NR5A2,MPC1,MYBL2,KDM3A,NRP2,TRIM2,SIRT1,PTP4A3,OTX2,HK2,KLF4,POU5F1,ZFP42,LRRC2,RNF125,RIF1
GO: Biological Process	GO:0045927	positive regulation of growth		0.0001204	1	0.008323	0.08004	39	331	MAP1B,BCL11A,MECP2,MEF2C,FGF2,CXCL12,CPNE9,SLC25A4,SMO,UNC13A,ATP8A2,BBS2,NCAM1,GDI1,KDM2B,C3,SEMA5A,SIRT1,ZFPM2,TGFB2,TGFBR1,HEY2,CD81,PRKN,CDH4,NRG1,CACNA2D2,HPN,VIL1,HYAL1,WNT3,IGF2,MAP2K5,PROX1,DBN1,DCX,RND2,LEF1,ZNF639
GO: Biological Process	GO:0046688	response to copper ion		0.0001243	1	0.008516	0.0819	11	47	MT1B,MT1E,MT1G,MT1H,MT1M,MT1X,BECN1,MT1HL1,NFE2L1,BACE1,CYP27B1
GO: Biological Process	GO:0010941	regulation of cell death		0.0001339	1	0.009087	0.08739	163	1969	RAMP2,RAMP3,ACTC1,MDK,F3,MECP2,MEF2C,PARP1,WDR35,FGF2,FGFR3,SRPX,ULK1,ALDH2,GPNMB,MMP9,ALOX12,CXCL12,USP36,FOXO1,TRAF7,KLF11,TEAD2,RRAS2,HYOU1,SLC25A4,ST6GAL1,SKIL,PIAS1,HDAC7,AR,ARAF,TXNIP,MSX1,LEFTY1,PYCARD,SNAI2,PTRH2,FOXP1,SMO,SMPD1,SNCB,BECN1,BBC3,MYBL2,GABRA5,NES,GLS2,UNC5B,BARD1,NCAM1,BCL2L1,JMY,SOCS2,GJA1,NEFL,ALKBH1,BMPR1B,NF2,BTK,TAX1BP1,SYK,KDM2B,NQO2,NODAL,NOS1,NPM1,TRIM2,CALCR,PIM2,N…
GO: Biological Process	GO:0071294	cellular response to zinc ion		0.0001347	1	0.009087	0.08739	8	26	PARP1,MT1B,MT1E,MT1G,MT1H,MT1M,MT1X,MT1HL1
GO: Biological Process	GO:0007507	heart development		0.0001395	1	0.009337	0.08979	69	700	RAMP2,MB,ACTC1,MEF2C,MEIS1,RYR1,FBN1,JAG1,FGF2,MMP9,BICC1,TEAD2,SEMA3C,SLC25A4,MSX1,LEFTY1,SLIT3,SNAI2,DCHS1,FOXP1,SMO,SPARC,NCAM1,NRP2,GJA1,FOXH1,NODAL,TDGF1,TDGF1P3,SIRT1,ZFPM2,TGFB2,TGFB3,TGFBR1,THBS1,HEY2,PAX3,TP53,NRG1,PDGFRA,PDLIM7,SAV1,APELA,OVOL2,FLRT3,KDM6A,VCAM1,COL2A1,COL3A1,COL5A1,COL11A1,CPE,POU5F1,TENM4,CCM2L,NEK8,MAP2K5,NDRG4,CXADR,PROX1,RB1CC1,KCNJ8,FAT4,RARB,SALL4,RGS2,RGS4,VANGL…
GO: Biological Process	GO:0035265	organ growth		0.0001407	1	0.009342	0.08984	31	243	MEF2C,MEIS1,FGF2,FGFR3,SLC25A4,AR,FOXP1,SMO,NCAM1,GJA1,SIRT1,ZFPM2,TGFB2,TGFBR1,THBS1,HEY2,PDGFRA,CACNA2D2,SAV1,COL6A3,COL12A1,TENM4,CCM2L,NDRG4,CXADR,PROX1,BNC2,RARB,BCL2L11,RGS2,RGS4
GO: Biological Process	GO:0090278	negative regulation of peptide hormone secretion		0.0001466	1	0.009656	0.09286	13	64	KLF7,NOS1,SIRT1,PRKN,PDE1C,PDE4C,CHGA,PFKL,VSNL1,ACVR1C,PSMD9,MIDN,SYTL4
GO: Biological Process	GO:0010771	negative regulation of cell morphogenesis involved in differentiation		0.0001484	1	0.00969	0.09319	18	109	EPHB2,MAP2,BCL11A,ULK1,SEMA3C,FSTL4,GDI1,SEMA4A,SEMA5A,LINGO1,WNT3,DNM3,ULK2,SEMA3E,DCC,EFNB3,LRP4,EPHA7
GO: Biological Process	GO:0022604	regulation of cell morphogenesis		0.0001511	1	0.00969	0.09319	57	551	EPHB2,MAP1B,MAP2,RHOJ,BCL11A,MDK,MECP2,BRWD3,ULK1,CXCL12,SEMA3C,SHROOM3,CPNE9,ST6GAL1,LRRC4C,SKIL,CASK,RHOH,UNC13A,SPARC,FSTL4,GDI1,NEFM,NEFL,SEMA4A,DNMBP,NRCAM,NTRK2,SEMA5A,PIAS2,LINGO1,CD44,PRKN,CDH4,NRG1,ENPP2,PARVB,HPN,VIL1,CHODL,WNT3,KNDC1,DNM3,ULK2,SEMA3E,LZTS3,DBN1,DCC,DCX,ZEB2,PARP6,LPAR1,EFNB3,LRP4,RND2,EPHA4,EPHA7
GO: Biological Process	GO:0051216	cartilage development		0.0001517	1	0.00969	0.09319	30	233	MDK,MEF2C,FGF2,FGFR3,MSX1,SNAI2,SOX5,BBS2,BMPR1B,ZEB1,CNMD,SERPINH1,TGFB2,TGFBR1,THBS1,CD44,TRPS1,HOXA3,HOXB3,COL2A1,COL6A3,PRRX1,COL11A1,COL12A1,HYAL1,ZBTB16,RARB,ADAMTS12,ALX1,LUM
GO: Biological Process	GO:0048639	positive regulation of developmental growth		0.0001517	1	0.00969	0.09319	30	233	MAP1B,BCL11A,MECP2,MEF2C,FGF2,CXCL12,CPNE9,SLC25A4,SMO,UNC13A,ATP8A2,BBS2,NCAM1,GDI1,C3,SEMA5A,SIRT1,ZFPM2,HEY2,PRKN,CDH4,NRG1,CACNA2D2,VIL1,WNT3,IGF2,PROX1,DBN1,DCX,RND2
GO: Biological Process	GO:0072358	cardiovascular system development		0.0001584	1	0.01004	0.09656	84	897	EPHB2,GGNBP2,RAMP2,RAMP3,RHOJ,ACTA2,MDK,F3,MECP2,MEF2C,MEIS1,MFGE8,JAG1,FGF2,GPNMB,MMP9,CXCL12,FOXO1,TEAD2,SEMA3C,VASH1,HDAC7,ARHGEF15,PLPP3,EPC1,FOXP1,SMO,BECN1,SPARC,UNC5B,NRP2,GJA1,GJA4,SGPL1,SYK,C3,SEMA4A,FOXH1,NODAL,NRCAM,NTRK2,CNMD,SEMA5A,TDGF1,NXN,TERT,SIRT1,ZFPM2,TGFB2,TGFBR1,THBS1,HEY2,HK2,PDGFRA,ENPP2,APELA,KLF4,OVOL2,HOXA3,HOXB3,KDM6A,COL1A2,COL3A1,COL5A1,PRRX1,WARS1,HYAL1,XDH,IGF2,MAP…
GO: Biological Process	GO:0042325	regulation of phosphorylation		0.0001644	1	0.01029	0.09897	149	1781	EPHB2,GGNBP2,RAMP3,ACTA2,PPP1R14A,CCNO,DNAJC27,ACVR1B,ACVR2A,NDRG2,CCL26,ADORA2B,SAA1,FBP1,ATXN1,PPP1R1B,FGF2,NLRC5,AK4,FGFR3,GPNMB,MAD2L2,MMP9,FOXO1,TRAF7,SFRP5,ATG14,PYDC1,ERN2,IL23A,AR,ARAF,LEFTY1,RHOH,PLPP3,PYCARD,SMPD1,LIMCH1,INPP5J,GPRC5B,GAP43,BARD1,GCNT2,SOCS2,LDB1,NF2,SYK,CCNA1,GMFB,C3,TAF7,NQO2,NODAL,NOS1,NPM1,CALCR,NTF3,NTRK2,NSD1,TDGF1,GRM4,SIRT1,DIRAS3,OPRD1,CCND2,PTPN5,TGFB2,TGFB3,L…
GO: Biological Process	GO:0009967	positive regulation of signal transduction		0.0001648	1	0.01029	0.09897	152	1823	EPHB2,AMER1,RAMP3,ACPP,ACTA2,DNAJC27,ACVR1B,ACVR2A,WLS,CCL26,F3,TRDN,TRIM22,ADORA2B,PARP1,SAA1,JAG1,WDR35,FGF2,NLRC5,FGFR3,SRPX,GPNMB,MMP9,ALOX15B,WDR24,TRAF7,SH3BGRL,SORBS1,SKIL,ERN2,IL23A,AR,ARAF,MSX1,LEFTY1,PYCARD,FOXP1,SMO,TMEM108,BECN1,BBC3,UNC13A,DKK2,GPRC5B,UNC5B,ZNF423,NCAM1,BCL2L1,GCNT2,CNTN6,SOCS2,GIP,GJA1,BMPR1B,SYK,C3,TAF1,NQO2,NODAL,NOS1,CALCR,PIM2,GPR27,NTF3,NTRK2,KCP,SEMA5A,TDGF1,G…
GO: Biological Process	GO:0010038	response to metal ion		0.0001683	1	0.01043	0.1003	45	407	MECP2,MEF2C,RYR1,PARP1,FBP1,MMP9,CPNE9,TXNIP,MT1B,MT1E,MT1G,MT1H,MT1M,MT1X,SLC25A12,SNCB,ATP12A,BECN1,SPARC,GATM,NCAM1,GDI1,MT1HL1,NFE2L1,KCNMB4,NPTX1,SYT6,TERT,TNFRSF11B,THBS1,GUCA1A,PRKN,PDE1C,PENK,BACE1,PKLR,PLA2G4A,VCAM1,XDH,TESMIN,CYP27B1,DNMT3A,DPEP1,LCK,RASGRP2
GO: Biological Process	GO:0032956	regulation of actin cytoskeleton organization		0.0001742	1	0.01072	0.1031	42	372	RHOJ,MDK,CCL26,MEF2C,BAIAP2L2,CXCL12,ARHGEF15,RHOH,PYCARD,LIMCH1,FSCN1,IQGAP2,JMY,NF2,GMFB,NPHS1,CARMIL2,NTF3,CAPG,SEMA5A,TGFB2,TGFB3,TGFBR1,FAM107A,PRKN,HCLS1,SYNPO2,PDGFRA,VIL1,SEMA3E,PROX1,MTSS1,SPIRE1,DBN1,VILL,STMN1,LPAR1,RGS4,ARHGEF10L,VANGL2,RND2,EPHA3
GO: Biological Process	GO:0001503	ossification		0.0001773	1	0.01082	0.104	48	444	ACVR2A,MDK,MEF2C,RYR1,JAG1,FGF2,FGFR3,GPNMB,MN1,RRAS2,ITGA11,BMP2K,IFITM1,HDAC7,SBNO2,SNAI2,DCHS1,SMO,TXLNG,SPARC,GJA1,BMPR1B,CALCR,CNMD,PIAS2,TGFB2,TGFB3,PBX1,DDX21,TPH1,PDLIM7,PENK,CTHRC1,COL1A2,COL2A1,COL5A2,COL11A1,WNT3,IGF2,ZBTB16,CYP27B1,MTSS1,GDPD2,MRC2,FAT4,PAM16,LRP4,LEF1
GO: Biological Process	GO:0048675	axon extension		0.0001783	1	0.01082	0.104	21	140	MAP1B,MAP2,ULK1,CXCL12,SEMA3C,SLIT3,SMO,FSTL4,NDN,GDI1,NRP2,SEMA4A,NRCAM,SEMA5A,CDH4,NRG1,WNT3,ULK2,SEMA3E,DBN1,DCX
GO: Biological Process	GO:0006002	fructose 6-phosphate metabolic process		0.0001884	1	0.01135	0.1091	5	10	FBP1,GFPT1,NFE2L1,PFKL,GNPDA1
GO: Biological Process	GO:0150063	visual system development		0.0001986	1	0.01166	0.1122	46	422	EPHB2,RHOJ,MEIS1,MEIS2,FAT1,FBN1,SALL2,JAG1,FGF2,FGFR3,SKIL,ARHGEF15,NES,ATP8A2,GJA1,PROM1,BMPR1B,NF2,KDM2B,C3,GPM6A,CACNA1F,ZEB1,CALB1,NTRK2,CRB1,TGFB2,TGFBR1,OTX2,PDGFRA,KLF4,COL5A1,COL5A2,CRYBA4,BCL11B,NKD1,UNC45B,PROX1,CYP1B1,DCX,ZEB2,FZD5,CDON,RARB,FOXP2,EPHB1
GO: Biological Process	GO:0001704	formation of primary germ layer		0.000202	1	0.01166	0.1122	27	204	NANOG,ACVR2A,WLS,MMP9,PLPP3,PHLDB1,LDB1,NF2,NODAL,NSD1,TDGF1,OTX2,TP53,APELA,KLF4,HNF4A,KDM6A,COL5A1,COL5A2,COL11A1,COL12A1,WNT3,POU5F1,TENM4,MAP2K5,VANGL2,LEF1
GO: Biological Process	GO:0001705	ectoderm formation		0.000202	1	0.01166	0.1122	27	204	NANOG,ACVR2A,WLS,MMP9,PLPP3,PHLDB1,LDB1,NF2,NODAL,NSD1,TDGF1,OTX2,TP53,APELA,KLF4,HNF4A,KDM6A,COL5A1,COL5A2,COL11A1,COL12A1,WNT3,POU5F1,TENM4,MAP2K5,VANGL2,LEF1
GO: Biological Process	GO:0007369	gastrulation		0.000202	1	0.01166	0.1122	27	204	NANOG,ACVR2A,WLS,MMP9,PLPP3,PHLDB1,LDB1,NF2,NODAL,NSD1,TDGF1,OTX2,TP53,APELA,KLF4,HNF4A,KDM6A,COL5A1,COL5A2,COL11A1,COL12A1,WNT3,POU5F1,TENM4,MAP2K5,VANGL2,LEF1
GO: Biological Process	GO:0001707	mesoderm formation		0.000202	1	0.01166	0.1122	27	204	NANOG,ACVR2A,WLS,MMP9,PLPP3,PHLDB1,LDB1,NF2,NODAL,NSD1,TDGF1,OTX2,TP53,APELA,KLF4,HNF4A,KDM6A,COL5A1,COL5A2,COL11A1,COL12A1,WNT3,POU5F1,TENM4,MAP2K5,VANGL2,LEF1
GO: Biological Process	GO:0001706	endoderm formation		0.000202	1	0.01166	0.1122	27	204	NANOG,ACVR2A,WLS,MMP9,PLPP3,PHLDB1,LDB1,NF2,NODAL,NSD1,TDGF1,OTX2,TP53,APELA,KLF4,HNF4A,KDM6A,COL5A1,COL5A2,COL11A1,COL12A1,WNT3,POU5F1,TENM4,MAP2K5,VANGL2,LEF1
GO: Biological Process	GO:0098780	response to mitochondrial depolarisation		0.0002036	1	0.01168	0.1123	7	21	ULK1,ATG14,BECN1,PRKN,HK2,TOMM7,ATG13
GO: Biological Process	GO:0043504	mitochondrial DNA repair		0.0002108	1	0.01201	0.1155	4	6	PARP1,CHCHD4,TP53,LIG3
GO: Biological Process	GO:0090199	regulation of release of cytochrome c from mitochondria		0.000224	1	0.01261	0.1213	11	50	WDR35,MMP9,PYCARD,BBC3,BCL2L1,PRKN,TP53,PMAIP1,FAM162A,BCL2L11,PAM16
GO: Biological Process	GO:0060284	regulation of cell development		0.0002245	1	0.01261	0.1213	101	1133	EPHB2,MAP1B,MAP2,BCL11A,MDK,CSMD3,MECP2,MEF2C,MEIS1,FBN1,ATXN1,JAG1,FGF2,FGFR3,ULK1,CXCL12,SEMA3C,CPNE9,SLC25A4,ST6GAL1,LRRC4C,SKIL,CASK,FOXP1,SMO,SNAP25,UNC13A,INPP5J,GPRC5B,SOX5,ATP8A2,FSTL4,RAP1GAP2,GDI1,SOCS2,NEFM,NEFL,PER2,NF2,SEMA4A,NODAL,NOS1,CNTN4,ZEB1,NRCAM,NTF3,NTRK2,SEMA5A,PIAS2,TERT,NR2F1,SIRT1,PTPN5,LINGO1,KLK8,HEY2,PRKN,PBX1,CDH4,TP53,IL34,NRG1,ENPP2,KLF4,PRUNE1,HOXB3,NEGR1,PMP22,CO…
GO: Biological Process	GO:0048332	mesoderm morphogenesis		0.0002373	1	0.01318	0.1268	27	206	NANOG,ACVR2A,WLS,MMP9,PLPP3,PHLDB1,LDB1,NF2,NODAL,NSD1,TDGF1,OTX2,TP53,APELA,KLF4,HNF4A,KDM6A,COL5A1,COL5A2,COL11A1,COL12A1,WNT3,POU5F1,TENM4,MAP2K5,VANGL2,LEF1
GO: Biological Process	GO:0106030	neuron projection fasciculation		0.0002395	1	0.01318	0.1268	8	28	EPHB2,NCAM1,NDN,CNTN4,NRCAM,SEMA5A,EPHA3,EPHA4
GO: Biological Process	GO:0007413	axonal fasciculation		0.0002395	1	0.01318	0.1268	8	28	EPHB2,NCAM1,NDN,CNTN4,NRCAM,SEMA5A,EPHA3,EPHA4
GO: Biological Process	GO:0003206	cardiac chamber morphogenesis		0.0002408	1	0.01318	0.1268	21	143	MEF2C,JAG1,SEMA3C,SLIT3,SMO,NRP2,FOXH1,ZFPM2,TGFB2,TGFBR1,HEY2,TP53,NRG1,SAV1,OVOL2,COL11A1,CPE,CCM2L,PROX1,RARB,VANGL2
GO: Biological Process	GO:0007167	enzyme linked receptor protein signaling pathway		0.0002505	1	0.01363	0.131	100	1123	EPHB2,MATK,NANOG,ACVR1B,ACVR2A,F3,PARP1,FBN1,ATXN1,FGF2,FGFR3,ULK1,MMP9,FST,FOXO1,SFRP5,SORBS1,SKIL,AR,TXNIP,MSX1,LEFTY1,TMEM108,PRDM14,ZNF423,FSTL4,NDN,GCNT2,NRP2,SOCS2,BMPR1B,SGPL1,SYK,FOXH1,NODAL,ZEB1,NTF3,NTRK2,CNMD,KCP,TDGF1,TDGF1P3,SIRT1,TGFB2,TGFB3,LEFTY2,TGFBR1,THBS1,PTP4A3,OTX2,CD7,GUCY2C,TP53,NRG1,RASGRP4,PDE6G,PDGFRA,TRPS1,ATP6V1F,GIGYF1,APELA,HNF4A,OVOL2,ZFYVE9,HPN,FLRT3,COL1A2,COL3A1…
GO: Biological Process	GO:0048880	sensory system development		0.0002594	1	0.01402	0.1348	46	427	EPHB2,RHOJ,MEIS1,MEIS2,FAT1,FBN1,SALL2,JAG1,FGF2,FGFR3,SKIL,ARHGEF15,NES,ATP8A2,GJA1,PROM1,BMPR1B,NF2,KDM2B,C3,GPM6A,CACNA1F,ZEB1,CALB1,NTRK2,CRB1,TGFB2,TGFBR1,OTX2,PDGFRA,KLF4,COL5A1,COL5A2,CRYBA4,BCL11B,NKD1,UNC45B,PROX1,CYP1B1,DCX,ZEB2,FZD5,CDON,RARB,FOXP2,EPHB1
GO: Biological Process	GO:0045105	intermediate filament polymerization or depolymerization		0.000266	1	0.01429	0.1374	3	3	NES,NEFM,NEFL
GO: Biological Process	GO:0043549	regulation of kinase activity		0.0002691	1	0.01436	0.1381	89	978	EPHB2,GGNBP2,CCNO,ADORA2B,SAA1,PPP1R1B,FGF2,NLRC5,FGFR3,GPNMB,TRAF7,SFRP5,ATG14,PYDC1,ERN2,IL23A,ARAF,RHOH,PYCARD,SMPD1,GPRC5B,GAP43,SOCS2,LDB1,NF2,SYK,CCNA1,GMFB,TAF7,NPM1,NTF3,NTRK2,TDGF1,GRM4,SIRT1,DIRAS3,CCND2,PTPN5,TGFB2,TGFB3,DNAJA3,TGFBR1,THBS1,CD19,MAP4K1,DUSP16,CD44,CD81,PRKN,LPAR2,CDC25C,PIK3R5,CHP1,CDKN2D,NRG1,SYNPO2,PDE6G,PDGFRA,PFKFB2,KLF4,HNF4A,PIK3IP1,PMP22,WARS1,DEPTOR,ZNF16,IBTK,…
GO: Biological Process	GO:0051493	regulation of cytoskeleton organization		0.0002818	1	0.01483	0.1427	58	577	MAP1A,MAP1B,MAP2,RHOJ,MDK,CCL26,MECP2,MEF2C,TUBB4A,BAIAP2L2,CXCL12,ARHGEF15,RHOH,PYCARD,LIMCH1,FSCN1,INPP5J,NES,IQGAP2,JMY,BICD1,PHLDB1,NF2,GMFB,NPHS1,NPM1,CARMIL2,NTF3,CAPG,SEMA5A,TERF1,TGFB2,TGFB3,TGFBR1,FAM107A,PRKN,HCLS1,SYNPO2,PDGFRA,PRUNE1,MID1IP1,VIL1,CLIP3,SEMA3E,PROX1,MTSS1,SPIRE1,DBN1,HDGFL3,VILL,TRIM54,STMN1,LPAR1,RGS4,ARHGEF10L,VANGL2,RND2,EPHA3
GO: Biological Process	GO:1902043	positive regulation of extrinsic apoptotic signaling pathway via death domain receptors		0.0002832	1	0.01483	0.1427	6	16	SKIL,BMPR1B,THBS1,TRPS1,PMAIP1,PSEN2
GO: Biological Process	GO:0060038	cardiac muscle cell proliferation		0.0002833	1	0.01483	0.1427	14	77	MEF2C,MEIS1,FGF2,FOXP1,NCAM1,GJA1,ZFPM2,TGFB2,TGFBR1,HEY2,SAV1,TENM4,NDRG4,CXADR
GO: Biological Process	GO:0007626	locomotory behavior		0.000291	1	0.01506	0.1448	31	253	MECP2,MEIS1,ATXN1,PPP1R1B,CXCL12,SNAP25,GPRC5B,MYO5A,NPAS3,GIP,GMFB,NOVA1,CALB1,OPRD1,CCND2,PRKN,OLFM2,NRG1,PENK,NEGR1,PMP22,HTR2C,ZIC1,DBN1,KCND2,DNM1,SEZ6L2,EFNB3,LSAMP,MCOLN3,EPHA4
GO: Biological Process	GO:1902903	regulation of supramolecular fiber organization		0.0002911	1	0.01506	0.1448	42	381	MAP1A,MAP1B,MAP2,CCL26,MECP2,MEF2C,TUBB4A,BAIAP2L2,CXCL12,ARHGEF15,PYCARD,LIMCH1,INPP5J,IQGAP2,JMY,NF2,GMFB,NPHS1,CARMIL2,CAPG,SEMA5A,TERF1,TGFB3,TGFBR1,PRKN,HCLS1,SYNPO2,PRUNE1,MID1IP1,VIL1,CLIP3,PROX1,MTSS1,SPIRE1,DBN1,HDGFL3,VILL,TRIM54,STMN1,LPAR1,RGS4,ARHGEF10L
GO: Biological Process	GO:0048762	mesenchymal cell differentiation		0.0002958	1	0.0152	0.1462	30	242	AMER1,MDK,MEF2C,JAG1,MAD2L2,SEMA3C,MSX1,SNAI2,SMO,GCNT2,NRP2,GJA1,PHLDB1,SEMA4A,AKNA,SEMA5A,TGFB2,TGFB3,TGFBR1,HEY2,PAX3,NRG1,OVOL2,HPN,SEMA3E,ZEB2,VANGL2,ALX1,LEF1,EPHA3
GO: Biological Process	GO:0006882	cellular zinc ion homeostasis		0.0002996	1	0.01526	0.1468	9	36	MT1B,MT1E,MT1G,MT1H,MT1M,MT1X,MT1HL1,LCK,SLC39A10
GO: Biological Process	GO:0001568	blood vessel development		0.0003006	1	0.01526	0.1468	79	849	EPHB2,GGNBP2,RAMP2,RAMP3,RHOJ,ACTA2,MDK,F3,MECP2,MEF2C,MEIS1,MFGE8,JAG1,FGF2,GPNMB,MMP9,CXCL12,FOXO1,TEAD2,SEMA3C,VASH1,HDAC7,PLPP3,SMO,BECN1,SPARC,UNC5B,NRP2,GJA1,GJA4,SGPL1,SYK,C3,SEMA4A,FOXH1,NODAL,NRCAM,NTRK2,CNMD,SEMA5A,TDGF1,TERT,SIRT1,ZFPM2,TGFB2,TGFBR1,THBS1,HEY2,HK2,PDGFRA,ENPP2,APELA,KLF4,OVOL2,HOXA3,HOXB3,COL1A2,COL3A1,COL5A1,PRRX1,WARS1,HYAL1,XDH,IGF2,MAP2K5,SEMA3E,PROX1,CYP1B1,DCN,PT…
GO: Biological Process	GO:0001654	eye development		0.0003056	1	0.01543	0.1484	45	418	EPHB2,RHOJ,MEIS1,MEIS2,FAT1,FBN1,SALL2,JAG1,FGF2,FGFR3,SKIL,ARHGEF15,NES,ATP8A2,GJA1,PROM1,BMPR1B,NF2,KDM2B,GPM6A,CACNA1F,ZEB1,CALB1,NTRK2,CRB1,TGFB2,TGFBR1,OTX2,PDGFRA,KLF4,COL5A1,COL5A2,CRYBA4,BCL11B,NKD1,UNC45B,PROX1,CYP1B1,DCX,ZEB2,FZD5,CDON,RARB,FOXP2,EPHB1
GO: Biological Process	GO:0050678	regulation of epithelial cell proliferation		0.0003542	1	0.01777	0.1709	46	433	MDK,CCL26,F3,MEF2C,ADORA2B,FGF2,FGFR3,CXCL12,VASH1,AR,CASK,SNAI2,UHRF1,FOXP1,SMO,SPARC,NRP2,GJA1,NODAL,NPM1,CNMD,SEMA5A,SIRT1,CCND2,TGFB2,TGFBR1,THBS1,SAV1,APELA,OVOL2,FMC1,HPN,VDR,HYAL1,XDH,BCL11B,IGF2,MAP2K5,CXADR,PROX1,EPPK1,MTSS1,PTPRK,FOXP2,VASH2,ZNF304
GO: Biological Process	GO:0014070	response to organic cyclic compound		0.0003584	1	0.01788	0.1719	95	1067	EPHX1,ABCA1,ABCA2,ABCA3,RAMP2,RAMP3,MAP1B,MDK,MECP2,MEF2C,RXRG,RYR1,ACSL3,PARP1,AGL,PPP1R1B,FOXO1,GRAMD1A,PIAS1,AR,SLC5A5,TXNIP,SLIT3,NR5A2,SNAI2,FOXP1,SMO,SMPD1,ATP12A,CATSPERG,BECN1,KDM3A,SPARC,NCAM1,BCL2L1,GGT1,SOCS2,GIP,GJA1,NEFL,NFE2L1,GNAL,TAF1,TAF7,FOXH1,NODAL,NOS1,CA9,NPM1,CALCR,NTRK2,PIAS2,NR2F1,SIRT1,OPRD1,TGFB2,TGFB3,TGFBR1,THBS1,FAM107A,PRKN,DDX21,CDKN2D,GNG2,PENK,RFTN2,KLF4,HNF4A,PKL…
GO: Biological Process	GO:0060562	epithelial tube morphogenesis		0.0003618	1	0.01794	0.1726	43	397	MDK,MEF2C,FGF2,ALOX12,CXCL12,TEAD2,SHROOM3,SFRP5,AR,DCHS1,FOXP1,SMO,HESX1,GJA1,ADAMTS16,KDM2B,FOXH1,NODAL,LIAS,SEMA5A,TGFB2,CD44,PAX3,PBX1,PDGFRA,OVOL2,CTHRC1,KDM6A,VDR,NDRG4,IPMK,SEMA3E,PROX1,MTSS1,ZEB2,FAT4,SALL4,VANGL2,ADAMTS12,ALX1,LEF1,EPHA4,EPHA7
GO: Biological Process	GO:0061448	connective tissue development		0.0003666	1	0.01807	0.1738	36	314	AMER1,ACTA2,MDK,MEF2C,FGF2,FGFR3,MSX1,KLF7,SNAI2,SOX5,BBS2,BMPR1B,ZEB1,CNMD,SERPINH1,SIRT1,TGFB2,TGFBR1,THBS1,CD44,TRPS1,HOXA3,HOXB3,COL2A1,COL5A1,COL6A3,PRRX1,COL11A1,COL12A1,HYAL1,ZBTB16,RARB,TBL1XR1,ADAMTS12,ALX1,LUM
GO: Biological Process	GO:0070997	neuron death		0.0003727	1	0.01808	0.1739	46	434	MDK,MECP2,MEF2C,PARP1,FGFR3,GPNMB,RRAS2,HYOU1,HDAC7,SMO,SNCB,BBC3,MYBL2,GABRA5,NES,UNC5B,BCL2L1,NEFL,ALKBH1,KDM2B,NQO2,NOS1,NPM1,TRIM2,NTF3,NTRK2,GRM4,TERT,SIRT1,PTPN5,TGFB2,TGFB3,PRKN,TP53,CHP1,HLA-F,BACE1,CHGA,PMAIP1,CNTFR,DCC,FAM162A,PCSK9,BCL2L11,EPHA7,EPHB1
GO: Biological Process	GO:0000422	autophagy of mitochondrion		0.0003732	1	0.01808	0.1739	14	79	ULK1,USP36,ATG14,FUNDC2,BECN1,ATG3,PRKN,TP53,HK2,TOMM7,ATG13,RB1CC1,FZD5,RNF41
GO: Biological Process	GO:0061726	mitochondrion disassembly		0.0003732	1	0.01808	0.1739	14	79	ULK1,USP36,ATG14,FUNDC2,BECN1,ATG3,PRKN,TP53,HK2,TOMM7,ATG13,RB1CC1,FZD5,RNF41
GO: Biological Process	GO:0008284	positive regulation of cell population proliferation		0.0003822	1	0.01841	0.1771	97	1096	MATK,NANOG,CD320,MDK,CCL26,F3,MECP2,MEF2C,MEIS2,ADORA2B,ATXN1,FGF2,FGFR3,MMP9,ALOX12,CDCA7L,CXCL12,DPPA2,ST6GAL1,IL23A,AR,PYCARD,FOXP1,SMO,NES,EAPP,NCAM1,BCL2L1,GCNT2,NRP2,SYK,TAF4B,NQO2,NODAL,NPM1,CARMIL2,NTF3,NTRK2,SEMA5A,TDGF1,TERT,SIRT1,ZFPM2,CCND2,TGFB2,TGFB3,DNAJA3,ORC1,TGFBR1,CD1D,THBS1,HEY2,CD81,PAX3,PBX1,HCLS1,IL34,NRG1,CCPG1,PDGFRA,ENPP2,APELA,HOXA3,HPN,CTHRC1,PLA2G4A,VCAM1,CNTFR,PRRX1,…
GO: Biological Process	GO:0031111	negative regulation of microtubule polymerization or depolymerization		0.0003937	1	0.01886	0.1814	10	45	MAP1A,MAP1B,MAP2,TUBB4A,INPP5J,MID1IP1,CLIP3,HDGFL3,TRIM54,STMN1
GO: Biological Process	GO:0060419	heart growth		0.0003998	1	0.01904	0.1831	20	138	MEF2C,MEIS1,FGF2,SLC25A4,FOXP1,NCAM1,GJA1,SIRT1,ZFPM2,TGFB2,TGFBR1,HEY2,SAV1,TENM4,CCM2L,NDRG4,CXADR,PROX1,RGS2,RGS4
GO: Biological Process	GO:0001944	vasculature development		0.0004078	1	0.01931	0.1857	81	884	EPHB2,GGNBP2,RAMP2,RAMP3,RHOJ,ACTA2,MDK,F3,MECP2,MEF2C,MEIS1,MFGE8,JAG1,FGF2,GPNMB,MMP9,CXCL12,FOXO1,TEAD2,SEMA3C,VASH1,HDAC7,ARHGEF15,PLPP3,EPC1,SMO,BECN1,SPARC,UNC5B,NRP2,GJA1,GJA4,SGPL1,SYK,C3,SEMA4A,FOXH1,NODAL,NRCAM,NTRK2,CNMD,SEMA5A,TDGF1,TERT,SIRT1,ZFPM2,TGFB2,TGFBR1,THBS1,HEY2,HK2,PDGFRA,ENPP2,APELA,KLF4,OVOL2,HOXA3,HOXB3,COL1A2,COL3A1,COL5A1,PRRX1,WARS1,HYAL1,XDH,IGF2,MAP2K5,SEMA3E,PROX1…
GO: Biological Process	GO:0003222	ventricular trabecula myocardium morphogenesis		0.0004145	1	0.01952	0.1877	6	17	FOXH1,TGFB2,TGFBR1,HEY2,NRG1,CCM2L
GO: Biological Process	GO:0055017	cardiac muscle tissue growth		0.0004497	1	0.02106	0.2025	19	129	MEF2C,MEIS1,FGF2,SLC25A4,FOXP1,NCAM1,GJA1,SIRT1,ZFPM2,TGFB2,TGFBR1,HEY2,SAV1,TENM4,CCM2L,NDRG4,CXADR,RGS2,RGS4
GO: Biological Process	GO:0045665	negative regulation of neuron differentiation		0.000454	1	0.02114	0.2033	32	271	EPHB2,MAP2,BCL11A,MECP2,MEIS1,JAG1,ULK1,SEMA3C,INPP5J,FSTL4,RAP1GAP2,GDI1,SEMA4A,CNTN4,SEMA5A,NR2F1,LINGO1,KLK8,PBX1,PMP22,WNT3,DNM3,ULK2,SEMA3E,DCC,LRIG2,LPAR1,EFNB3,LRP4,EPHA3,EPHA4,EPHA7
GO: Biological Process	GO:0048846	axon extension involved in axon guidance		0.0004631	1	0.0213	0.2049	9	38	CXCL12,SEMA3C,SLIT3,SMO,NRP2,SEMA4A,SEMA5A,WNT3,SEMA3E
GO: Biological Process	GO:1902284	neuron projection extension involved in neuron projection guidance		0.0004631	1	0.0213	0.2049	9	38	CXCL12,SEMA3C,SLIT3,SMO,NRP2,SEMA4A,SEMA5A,WNT3,SEMA3E
GO: Biological Process	GO:0031345	negative regulation of cell projection organization		0.0004674	1	0.0213	0.2049	28	226	EPHB2,MAP2,BCL11A,MECP2,ULK1,SEMA3C,INPP5J,FSTL4,RAP1GAP2,GDI1,SEMA4A,SEMA5A,NR2F1,LINGO1,KLK8,PMP22,WNT3,DNM3,ULK2,SEMA3E,DCC,LRIG2,LPAR1,EFNB3,LRP4,EPHA3,EPHA4,EPHA7
GO: Biological Process	GO:0051338	regulation of transferase activity		0.0004675	1	0.0213	0.2049	96	1089	EPHB2,GGNBP2,CCNO,ADORA2B,SAA1,PPP1R1B,FGF2,NLRC5,FGFR3,GPNMB,MAD2L2,PIF1,TRAF7,SFRP5,ATG14,PYDC1,ERN2,IL23A,ARAF,RHOH,PYCARD,SMPD1,GPRC5B,GAP43,SOCS2,LDB1,NF2,SYK,CCNA1,GMFB,TAF7,NPM1,NTF3,NTRK2,TDGF1,GRM4,TERF1,SIRT1,DIRAS3,CCND2,PTPN5,TGFB2,TGFB3,DNAJA3,TGFBR1,THBS1,CD19,MAP4K1,DUSP16,CD44,CD81,PRKN,PARN,LPAR2,SERINC5,CDC25C,PIK3R5,TP53,CHP1,CDKN2D,NRG1,SYNPO2,PDE6G,PDGFRA,PFKFB2,KLF4,HNF4A,PI…
GO: Biological Process	GO:0010470	regulation of gastrulation		0.0004751	1	0.02153	0.2071	10	46	NANOG,PHLDB1,NODAL,OTX2,KLF4,HNF4A,COL5A1,COL5A2,TENM4,MAP2K5
GO: Biological Process	GO:0002009	morphogenesis of an epithelium		0.0004917	1	0.02217	0.2132	62	641	MDK,MEF2C,JAG1,GPC4,CRB3,FGF2,FGFR3,FST,ALOX12,CXCL12,TEAD2,SEMA3C,SHROOM3,SFRP5,AR,SNAI2,DCHS1,PRICKLE2,FOXP1,SMO,HESX1,GJA1,ADAMTS16,KDM2B,FOXH1,NODAL,CA9,LIAS,CARMIL2,SEMA5A,TGFB2,CD44,PAX3,PBX1,PDGFRA,KLF4,OVOL2,CTHRC1,FLRT3,KDM6A,VDR,COL5A1,NKD1,NDRG4,IPMK,SEMA3E,PROX1,MTSS1,PSMD9,ZEB2,FZD5,DLG3,FAT4,SALL4,SAPCD2,VANGL2,ADAMTS12,ALX1,ARHGAP12,LEF1,EPHA4,EPHA7
GO: Biological Process	GO:0030307	positive regulation of cell growth		0.0005124	1	0.0229	0.2203	26	205	MAP1B,BCL11A,MECP2,CXCL12,CPNE9,SLC25A4,UNC13A,GDI1,KDM2B,SEMA5A,SIRT1,TGFB2,TGFBR1,CD81,PRKN,CDH4,NRG1,HPN,HYAL1,WNT3,MAP2K5,DBN1,DCX,RND2,LEF1,ZNF639
GO: Biological Process	GO:0090200	positive regulation of release of cytochrome c from mitochondria		0.0005135	1	0.0229	0.2203	8	31	WDR35,MMP9,PYCARD,BBC3,TP53,PMAIP1,FAM162A,BCL2L11
GO: Biological Process	GO:0044089	positive regulation of cellular component biogenesis		0.0005256	1	0.02324	0.2235	56	566	EPHB2,ABCA1,MAP1B,CCL26,MECP2,PARP1,STX18,LRRTM4,ULK1,BAIAP2L2,ARHGEF15,PYCARD,LIMCH1,FSCN1,BECN1,BBC3,IQGAP2,JMY,PHLDB1,SLITRK2,NF2,SYK,GMFB,SEMA4A,NPHS1,GPM6A,CARMIL2,NTRK2,CAPG,TERF1,TGFB3,TGFBR1,TP53,SYNPO2,ENPP2,CHGA,NR1H2,FLRT3,PMAIP1,VIL1,WARS1,HYAL1,CHD1L,PPP2R5B,CEP135,DNM3,PROX1,MTSS1,SPIRE1,G3BP2,PAN2,AKIRIN1,BCL2L11,LPAR1,ARHGEF10L,EPHB1
GO: Biological Process	GO:0043281	regulation of cysteine-type endopeptidase activity involved in apoptotic process		0.0005278	1	0.02324	0.2235	29	239	F3,WDR35,MMP9,ALOX12,PYCARD,BBC3,BCL2L1,SYK,NODAL,SIRT1,DNAJA3,THBS1,CD44,CDKN2D,KLF4,NLRC4,PMAIP1,VIL1,XDH,ACVR1C,MAP2K5,NLRP12,FAM162A,DPEP1,BCL2L11,UACA,LCK,LEF1,EPHA7
GO: Biological Process	GO:0007267	cell-cell signaling		0.0005293	1	0.02324	0.2235	154	1899	EPHB2,AMER1,SYN3,MAP1A,MAP1B,APCDD1,ACVR2A,MDK,WLS,NRN1,NDRG2,CCL26,MECP2,MEF2C,ADORA2B,FAT1,SLC8B1,ATXN1,SCN3A,GPC4,FGF2,FGFR3,GPNMB,MAD2L2,MMP9,BICC1,RNF138,MPP2,FOXO1,VPS18,SFRP5,SLC25A4,SORBS1,LRRC4C,AR,CASK,KLF7,PLPP3,CXXC4,SNAI2,PRICKLE2,SV2C,SMO,TMEM108,SNAP25,SNCB,UNC13A,DKK2,GPRC5B,GABRA5,SLC16A10,GABRP,MYO5A,NCAM1,BCL2L1,GIP,GJA1,PASK,GJA4,LDB1,PER2,RBMS3,BTK,TMEM131L,C3,KCNMB4,GNAL,NOD…
GO: Biological Process	GO:0019637	organophosphate metabolic process		0.0005461	1	0.02385	0.2294	104	1203	ADAL,ACPP,MECP2,ACSL3,ADORA2B,PARP1,FBP1,FGF2,AK4,FGFR3,ALDOC,TPST2,ATG14,APOC1,CASK,SLC25A12,G6PC3,PLPP3,UQCC3,EFR3B,MPC1,SMPD1,MPP6,FAM126B,INPP5J,AFG1L,MBOAT1,NIPSNAP2,GCDH,RBKS,BCL2L1,NMRK2,GFPT1,SOCS2,LDHD,SULT1A1,NFE2L1,SMPDL3A,SURF1,NME4,NOS1,PIGO,NME2P1,PAPSS2,NUDT4,CD19,GUCA1A,MTMR14,GUCY2C,GPCPD1,CD81,PRKN,CDA,SERAC1,SERINC5,PIK3R5,TP53,PDE1A,PDE4C,HK2,NAPEPLD,PDGFRA,ENPP2,PFKFB2,PFKL,K…
GO: Biological Process	GO:0060411	cardiac septum morphogenesis		0.0005532	1	0.02404	0.2312	14	82	JAG1,SEMA3C,SLIT3,SMO,NRP2,ZFPM2,TGFB2,TGFBR1,HEY2,TP53,SAV1,PROX1,RARB,VANGL2
GO: Biological Process	GO:0048562	embryonic organ morphogenesis		0.0005923	1	0.02557	0.2459	37	334	EPHB2,MEF2C,FBN1,TEAD2,MSX1,SMO,ATP8A2,HESX1,GJA1,KDM2B,FOXH1,NODAL,ZEB1,TGFB2,TGFB3,TGFBR1,OTX2,PDGFRA,OVOL2,HOXA3,HOXB3,HPN,CTHRC1,KDM6A,COL2A1,PRRX1,COL11A1,HYAL1,ZIC1,NDRG4,PROX1,FZD5,RARB,VANGL2,ALX1,RBPMS2,TSHZ1
GO: Biological Process	GO:0050796	regulation of insulin secretion		0.0005946	1	0.02557	0.2459	26	207	SLC8B1,SLC25A4,CASK,KLF7,SNAP25,GIP,GJA1,PER2,NOS1,GPR27,SIRT1,PRKN,PDE1C,PDE4C,CACNA2D2,PFKFB2,CHGA,PFKL,HNF4A,VSNL1,ACVR1C,CPT1A,PSMD9,NADK,MIDN,SYTL4
GO: Biological Process	GO:0060420	regulation of heart growth		0.0006124	1	0.02621	0.252	16	102	MEF2C,MEIS1,FGF2,SLC25A4,FOXP1,NCAM1,GJA1,SIRT1,ZFPM2,TGFBR1,HEY2,SAV1,CXADR,PROX1,RGS2,RGS4
GO: Biological Process	GO:0072332	intrinsic apoptotic signaling pathway by p53 class mediator		0.0006276	1	0.02672	0.2569	14	83	USP28,MSX1,PYCARD,BBC3,JMY,SIRT1,CD44,PRKN,TP53,PMAIP1,CDIP1,AEN,IFI16,ZNF385B
GO: Biological Process	GO:0051129	negative regulation of cellular component organization		0.0006485	1	0.02747	0.2642	75	818	EPHB2,MAP1A,MAP1B,MAP2,BCL11A,MECP2,STN1,PARP1,TUBB4A,FGFR3,ULK1,MAD2L2,PIF1,SEMA3C,PYDC1,APOC1,AR,ARHGEF15,BECN1,INPP5J,KDM3A,FSTL4,RAP1GAP2,BCL2L1,GDI1,VENTX,PER2,GMFB,SEMA4A,TAF7,NPM1,CARMIL2,CAPG,SEMA5A,TERF1,NR2F1,SIRT1,OPRD1,THBS1,LINGO1,FAM107A,KLK8,PRKN,TP53,MPV17L,MID1IP1,NR1H2,PMP22,VIL1,PHF23,WNT3,MAD2L1BP,CLIP3,DNM3,ULK2,SEMA3E,PSEN2,DBN1,DCC,PMEPA1,HDGFL3,LRIG2,VILL,SLC35F6,PCSK9,TRI…
GO: Biological Process	GO:0007398	ectoderm development		0.0006774	1	0.02823	0.2715	27	220	NANOG,ACVR2A,WLS,MMP9,PLPP3,PHLDB1,LDB1,NF2,NODAL,NSD1,TDGF1,OTX2,TP53,APELA,KLF4,HNF4A,KDM6A,COL5A1,COL5A2,COL11A1,COL12A1,WNT3,POU5F1,TENM4,MAP2K5,VANGL2,LEF1
GO: Biological Process	GO:0010638	positive regulation of organelle organization		0.0006776	1	0.02823	0.2715	64	675	MAP1B,CCL26,MECP2,STX18,WDR35,ULK1,MMP9,BAIAP2L2,USP36,ARHGEF15,MSX1,PYCARD,SNAI2,LIMCH1,FSCN1,BECN1,BBC3,NES,IQGAP2,JMY,NF2,GMFB,NOS1,NPHS1,NPM1,CARMIL2,NTF3,CAPG,SEMA5A,TERF1,SIRT1,PTPN5,TGFB3,TGFBR1,KAT7,PRKN,PARN,HCLS1,TP53,SYNPO2,HK2,PLA2G4A,HSPA1L,PMAIP1,VIL1,TOMM7,IGF2,CEP135,PROX1,ATG13,MTSS1,SPIRE1,DCN,FZD5,G3BP2,PAN2,DKC1,FAM162A,BCL2L11,PIWIL2,LPAR1,ARHGEF10L,RIF1,ZNF304
GO: Biological Process	GO:0043616	keratinocyte proliferation		0.0006798	1	0.02823	0.2715	10	48	MDK,FST,CASK,SNAI2,KLK8,OVOL2,VDR,BCL11B,EPPK1,PTPRK
GO: Biological Process	GO:0042771	intrinsic apoptotic signaling pathway in response to DNA damage by p53 class mediator		0.0006798	1	0.02823	0.2715	10	48	USP28,PYCARD,BBC3,SIRT1,CD44,TP53,PMAIP1,CDIP1,AEN,IFI16
GO: Biological Process	GO:0051247	positive regulation of protein metabolic process		0.0006871	1	0.02826	0.2717	152	1882	EPHB2,AMER1,RAMP3,ACTA2,DNAJC27,ACVR1B,ACVR2A,CCL26,F3,MECP2,ADORA2B,SAA1,WDR35,FGF2,SPSB4,FGFR3,GPNMB,MAD2L2,MMP9,ALOX12,FOXO1,TRAF7,POLDIP3,ATG14,ERN2,IL23A,PIAS1,AR,ARAF,LEFTY1,PLPP3,PYCARD,SNAI2,UHRF1,SMPD1,LIMCH1,BBC3,GPRC5B,GAP43,BARD1,GCNT2,CLPX,GJA1,PASK,LDB1,RBMS3,SYK,C3,TAF1,NQO2,NODAL,NOS1,NPM1,USP13,CALCR,NRDC,NTF3,NTRK2,TDGF1,GRM4,SIRT1,OPRD1,CCND2,PTPN5,TGFB2,TGFB3,LEFTY2,DNAJA3,TGF…
GO: Biological Process	GO:0007417	central nervous system development		0.0006872	1	0.02826	0.2717	98	1129	EPHB2,MAP2,ACVR1B,MDK,WLS,NDRG2,MECP2,ACSL3,ZIC4,PTCHD1,ATXN1,PCDH19,FGF2,AK4,FGFR3,ULK1,ALDH3A2,FBXO45,ZBTB18,CXCL12,MSX1,PLPP3,SLIT3,TAGLN3,FOXP1,SMO,TMEM108,TBC1D23,GABRA5,SOX5,NES,BBS2,NCAM1,NDN,HESX1,CNTN6,NRP2,NEFL,LDB1,NF2,NFE2L1,KDM2B,C3,DCLK2,TAF1,NODAL,CNTN4,NPTX1,ZEB1,NRCAM,NTF3,NTRK2,AKNA,SEMA5A,NR2F1,OTX2,LINGO1,SYNGR3,PRKN,PAX3,TP53,IL34,NRG1,ENPP2,HOXB3,COL2A1,COL3A1,FA2H,WNT3,COX7…
GO: Biological Process	GO:0030073	insulin secretion		0.0006914	1	0.02829	0.2721	29	243	SLC8B1,SLC25A4,CASK,KLF7,SNAP25,MYO5A,GIP,GJA1,PER2,NOS1,GPR27,SIRT1,PRKN,PDE1C,PDE4C,CACNA2D2,PFKFB2,CHGA,PFKL,HNF4A,VSNL1,ACVR1C,CPT1A,PSMD9,PTPRN2,NADK,GAL,MIDN,SYTL4
GO: Biological Process	GO:0014706	striated muscle tissue development		0.0007088	1	0.02879	0.2768	48	472	MBNL1,ACTC1,MEF2C,MEIS1,RYR1,FGF2,ZBTB18,SEMA3C,SLC25A4,SKIL,HDAC7,FOXP1,SMO,NCAM1,GJA1,FOXH1,NPHS1,TDGF1,SIRT1,ZFPM2,TGFB2,TGFBR1,GPCPD1,HEY2,PAX3,NRG1,PDGFRA,SAV1,MYOZ1,PLAGL1,PMP22,COL11A1,TENM4,CCM2L,NDRG4,CXADR,PROX1,BOC,DCN,CDON,RARB,AKIRIN1,FOXP2,TSC22D3,RGS2,RGS4,LEF1,EPHB1
GO: Biological Process	GO:0021675	nerve development		0.0007103	1	0.02879	0.2768	14	84	EPHB2,FGFR3,FBXO45,UNC13A,GABRA5,NRP2,NPTX1,NTF3,HOXA3,HOXB3,VCAM1,LRIG2,LPAR1,EPHB1
GO: Biological Process	GO:0048514	blood vessel morphogenesis		0.0007191	1	0.029	0.2789	70	755	EPHB2,RAMP2,RAMP3,RHOJ,MDK,F3,MECP2,MEIS1,MFGE8,JAG1,FGF2,GPNMB,MMP9,CXCL12,TEAD2,VASH1,HDAC7,SMO,BECN1,SPARC,UNC5B,NRP2,GJA1,SGPL1,SYK,C3,SEMA4A,FOXH1,NODAL,NRCAM,NTRK2,CNMD,SEMA5A,TDGF1,TERT,SIRT1,ZFPM2,TGFB2,TGFBR1,THBS1,HEY2,HK2,PDGFRA,ENPP2,APELA,KLF4,OVOL2,HOXA3,HOXB3,COL3A1,PRRX1,WARS1,HYAL1,XDH,IGF2,MAP2K5,SEMA3E,PROX1,CYP1B1,DCN,PTGIS,JAK1,ACKR3,FZD5,VANGL2,VASH2,RORA,LEF1,EPHB1,ZNF304
GO: Biological Process	GO:0048585	negative regulation of response to stimulus		0.0007409	1	0.02952	0.2839	155	1928	EPHB2,A2M,GGNBP2,AMER1,APCDD1,NANOG,MDK,NDRG2,TRDN,SAA1,FBN1,FBP1,ATXN1,MICB,JAG1,FGF2,NLRC5,FGFR3,MAD2L2,MMP9,FST,ALOX12,BICC1,CXCL12,FOXO1,SEMA3C,SFRP5,HYOU1,ST6GAL1,PYDC1,SKIL,HDAC7,AR,CASK,RHOH,KLF7,PYCARD,SLIT3,CXXC4,SNAI2,FOXP1,SMPD1,PRDM14,DKK2,ARHGAP42,UNC5B,FSTL4,BBS2,BCL2L1,BICD1,HELB,SOCS2,GJA1,NF2,RBMS3,TMEM131L,MICA,GNAL,SEMA4A,FOXH1,NODAL,MCHR1,CNMD,SEMA5A,TDGF1,GRM4,NXN,PIAS2,TERT,…
GO: Biological Process	GO:0010721	negative regulation of cell development		0.0007432	1	0.02952	0.2839	43	411	EPHB2,MAP2,BCL11A,MECP2,MEIS1,FBN1,JAG1,FGFR3,ULK1,SEMA3C,FOXP1,INPP5J,FSTL4,RAP1GAP2,GDI1,SEMA4A,NODAL,CNTN4,SEMA5A,TERT,NR2F1,LINGO1,KLK8,PBX1,TP53,NRG1,PMP22,COL3A1,WNT3,DNM3,ULK2,SEMA3E,DCC,LRIG2,RGS2,LPAR1,RGS4,GAL,EFNB3,LRP4,EPHA3,EPHA4,EPHA7
GO: Biological Process	GO:1903725	regulation of phospholipid metabolic process		0.0007458	1	0.02952	0.2839	15	94	ACSL3,FGF2,FGFR3,ATG14,APOC1,SOCS2,CD19,CD81,PIK3R5,PDGFRA,KLF4,PIK3IP1,HTR2C,IDH1,EPHA8
GO: Biological Process	GO:0060021	roof of mouth development		0.0007458	1	0.02952	0.2839	15	94	EPHB2,MEF2C,MSX1,SNAI2,SGPL1,TGFB2,TGFB3,TGFBR1,PDGFRA,COL2A1,PRRX1,BNC2,ALX1,TSHZ1,LEF1
GO: Biological Process	GO:1902533	positive regulation of intracellular signal transduction		0.0007642	1	0.0301	0.2895	97	1119	EPHB2,RAMP3,ACTA2,DNAJC27,WLS,CCL26,F3,TRDN,TRIM22,ADORA2B,SAA1,FGF2,FGFR3,GPNMB,WDR24,TRAF7,SKIL,ERN2,IL23A,AR,ARAF,MSX1,PYCARD,BECN1,BBC3,GPRC5B,UNC5B,NCAM1,BCL2L1,GCNT2,GIP,GJA1,SYK,C3,NQO2,NODAL,NOS1,CALCR,PIM2,NTF3,NTRK2,SEMA5A,TDGF1,GRM4,SIRT1,TGFB2,TGFB3,TGFBR1,THBS1,PTP4A3,CD19,GUCA1A,MAP4K1,CD44,CD81,PRKN,LPAR2,DDX21,PIK3R5,HCLS1,TP53,NRG1,RASGRP4,PDE6G,PDGFRA,CHGA,APELA,PLA2G2A,PMAIP1,C…
GO: Biological Process	GO:0032270	positive regulation of cellular protein metabolic process		0.0007782	1	0.03051	0.2934	144	1774	EPHB2,AMER1,RAMP3,ACTA2,DNAJC27,ACVR1B,ACVR2A,CCL26,F3,MECP2,ADORA2B,SAA1,WDR35,FGF2,SPSB4,FGFR3,GPNMB,MAD2L2,MMP9,ALOX12,TRAF7,POLDIP3,ATG14,ERN2,IL23A,PIAS1,AR,ARAF,LEFTY1,PLPP3,PYCARD,SNAI2,UHRF1,SMPD1,LIMCH1,BBC3,GPRC5B,GAP43,GCNT2,CLPX,PASK,RBMS3,SYK,C3,TAF1,NQO2,NODAL,NOS1,NPM1,USP13,CALCR,NRDC,NTF3,NTRK2,TDGF1,GRM4,SIRT1,OPRD1,CCND2,PTPN5,TGFB2,TGFB3,LEFTY2,DNAJA3,TGFBR1,KAT7,THBS1,FAM107A…
GO: Biological Process	GO:0051961	negative regulation of nervous system development		0.000811	1	0.03158	0.3037	40	376	EPHB2,MAP2,BCL11A,MECP2,MEIS1,JAG1,FGFR3,ULK1,SEMA3C,ARHGEF15,INPP5J,FSTL4,RAP1GAP2,GDI1,SEMA4A,CNTN4,SEMA5A,TERT,NR2F1,LINGO1,KLK8,PBX1,TP53,NRG1,PMP22,COL3A1,WNT3,CPE,DNM3,ULK2,SEMA3E,DCC,LRIG2,RFX4,LPAR1,EFNB3,LRP4,EPHA3,EPHA4,EPHA7
GO: Biological Process	GO:0046486	glycerolipid metabolic process		0.0008129	1	0.03158	0.3037	48	475	PNPLA4,MECP2,FAAH,FABP6,ACSL3,FGF2,FGFR3,ATG14,APOC1,EFR3B,MOGAT3,FAM126B,INPP5J,MBOAT1,SOCS2,C3,PIGO,DAGLB,PNPLA5,SIRT1,CD19,MTMR14,GPCPD1,CD81,SERAC1,SERINC5,PIK3R5,NAPEPLD,PDGFRA,ENPP2,KLF4,PIK3IP1,PLA2G2A,PLA2G4A,NR1H2,PIGL,LMF1,HTR2C,CPT1A,IPMK,INPP5D,PITPNC1,MPPE1,RAB5A,PCSK9,TBL1XR1,DGKK,EPHA8
GO: Biological Process	GO:0033993	response to lipid		0.0008169	1	0.03159	0.3038	88	999	ABCA1,ABCA2,ABCA3,RAMP2,RAMP3,MAP1B,NANOG,MDK,MEF2C,RXRG,MEST,PARP1,AGL,MICB,WDR35,ALOX12,FOXO1,TEAD2,GRAMD1A,PIAS1,AR,SBNO2,TXNIP,PYCARD,SLIT3,NR5A2,SNAI2,FOXP1,SMO,CATSPERG,KDM3A,SPARC,GGT1,SOCS2,GIP,GJA1,NEFL,NFE2L1,TAF7,FOXH1,NODAL,NOS1,CA9,LIAS,CALCR,NTRK2,PIAS2,NR2F1,SIRT1,TGFB2,TGFB3,TGFBR1,THBS1,FAM107A,MAP4K1,CDKN2D,TRIML2,GNG2,PENK,KLF4,HNF4A,SHPK,NR1H2,VCAM1,VDR,WNT3,POU5F1,IDH1,CPT1A,…
GO: Biological Process	GO:0060391	positive regulation of SMAD protein signal transduction		0.0008206	1	0.03159	0.3038	5	13	PARP1,NODAL,TGFB3,TGFBR1,POU5F1
GO: Biological Process	GO:0055021	regulation of cardiac muscle tissue growth		0.0008351	1	0.032	0.3077	15	95	MEF2C,MEIS1,FGF2,SLC25A4,FOXP1,NCAM1,GJA1,SIRT1,ZFPM2,TGFBR1,HEY2,SAV1,CXADR,RGS2,RGS4
GO: Biological Process	GO:0007015	actin filament organization		0.0008871	1	0.03384	0.3254	44	427	RHOJ,ACTC1,CCL26,FAT1,MAD2L2,BAIAP2L2,CXCL12,SHROOM3,SORBS1,ARHGEF15,RHOH,PYCARD,LIMCH1,FSCN1,IQGAP2,JMY,NF2,GMFB,NPHS1,CARMIL2,CAPG,SEMA5A,TGFB3,TGFBR1,FAM107A,PRKN,CGNL1,HCLS1,SYNPO2,PLS3,VIL1,PROX1,MTSS1,GDPD2,SPIRE1,DBN1,VILL,DIAPH2,STMN1,LPAR1,RGS4,ARHGEF10L,ARHGAP12,RND2
GO: Biological Process	GO:0048863	stem cell differentiation		0.0009	1	0.03414	0.3283	32	282	A2M,NANOG,MEF2C,JAG1,FGF2,TEAD2,SEMA3C,MSX1,SNAI2,SMO,SOX5,KDM3A,NRP2,LDB1,SEMA4A,GPM6A,SEMA5A,TGFB2,ZSCAN10,PAX3,TP53,NRG1,PDGFRA,OVOL2,HSPA9,WNT3,POU5F1,SEMA3E,PSMD9,ZEB2,LBH,ALX1
GO: Biological Process	GO:0001932	regulation of protein phosphorylation		0.000903	1	0.03414	0.3283	133	1625	EPHB2,GGNBP2,RAMP3,ACTA2,CCNO,DNAJC27,ACVR1B,ACVR2A,NDRG2,CCL26,ADORA2B,SAA1,PPP1R1B,FGF2,FGFR3,GPNMB,MAD2L2,MMP9,FOXO1,TRAF7,SFRP5,ATG14,PYDC1,ERN2,IL23A,AR,ARAF,LEFTY1,PLPP3,PYCARD,SMPD1,LIMCH1,INPP5J,GPRC5B,GAP43,GCNT2,NF2,SYK,CCNA1,GMFB,C3,TAF7,NQO2,NODAL,NOS1,NPM1,CALCR,NTF3,NTRK2,NSD1,TDGF1,GRM4,SIRT1,DIRAS3,OPRD1,CCND2,PTPN5,TGFB2,TGFB3,LEFTY2,DNAJA3,TGFBR1,THBS1,MAP4K1,DUSP16,PRDX1,CD44,C…
GO: Biological Process	GO:0032970	regulation of actin filament-based process		0.0009303	1	0.03501	0.3367	44	428	RHOJ,ACTA2,MDK,CCL26,MEF2C,BAIAP2L2,CXCL12,ARHGEF15,RHOH,PYCARD,LIMCH1,FSCN1,IQGAP2,JMY,NF2,GMFB,NOS1,NPHS1,CARMIL2,NTF3,CAPG,SEMA5A,TGFB2,TGFB3,TGFBR1,FAM107A,PRKN,HCLS1,SYNPO2,PDGFRA,VIL1,SEMA3E,PROX1,MTSS1,SPIRE1,DBN1,VILL,STMN1,LPAR1,RGS4,ARHGEF10L,VANGL2,RND2,EPHA3
GO: Biological Process	GO:0097176	epoxide metabolic process		0.0009473	1	0.03503	0.3368	3	4	EPHX1,ALOX12,EPHX3
GO: Biological Process	GO:0061113	pancreas morphogenesis		0.0009473	1	0.03503	0.3368	3	4	NR5A2,SMO,PROX1
GO: Biological Process	GO:1903225	negative regulation of endodermal cell differentiation		0.0009473	1	0.03503	0.3368	3	4	NANOG,COL5A1,COL5A2
GO: Biological Process	GO:0006145	purine nucleobase catabolic process		0.0009473	1	0.03503	0.3368	3	4	AOX1,XDH,DPYD
GO: Biological Process	GO:0046620	regulation of organ growth		0.0009548	1	0.03515	0.338	19	137	MEF2C,MEIS1,FGF2,SLC25A4,FOXP1,SMO,NCAM1,GJA1,SIRT1,ZFPM2,TGFBR1,HEY2,CACNA2D2,SAV1,CXADR,PROX1,BCL2L11,RGS2,RGS4
GO: Biological Process	GO:0008038	neuron recognition		0.0009987	1	0.03645	0.3505	11	59	EPHB2,GAP43,NCAM1,NDN,CNTN6,CNTN4,NRCAM,SEMA5A,EFNB3,EPHA3,EPHA4
GO: Biological Process	GO:2001238	positive regulation of extrinsic apoptotic signaling pathway		0.0009987	1	0.03645	0.3505	11	59	SRPX,SKIL,PYCARD,UNC5B,BMPR1B,TGFB2,THBS1,TRPS1,PMAIP1,BCL2L14,PSEN2
GO: Biological Process	GO:0010942	positive regulation of cell death		0.00103	1	0.03741	0.3598	76	845	RAMP3,F3,MEF2C,PARP1,WDR35,FGFR3,SRPX,MMP9,ALOX12,FOXO1,TRAF7,KLF11,SKIL,TXNIP,MSX1,PYCARD,PTRH2,FOXP1,SMPD1,BECN1,BBC3,MYBL2,UNC5B,BARD1,BCL2L1,JMY,BMPR1B,SYK,NQO2,NODAL,NOS1,CALCR,TERF1,SIRT1,PTPN5,TGFB2,TGFB3,DNAJA3,TGFBR1,THBS1,TNFRSF8,CD44,PRKN,TP53,TRPS1,BACE1,SAV1,NLRC4,PLA2G4A,PMAIP1,VDR,XDH,ACVR1C,AKAP12,CLIP3,MAP2K6,PRODH,CYP1B1,BCL2L14,NLRP12,ZBTB16,PSEN2,INPP5D,ARHGEF11,PTGIS,FAM162A,…
GO: Biological Process	GO:0050772	positive regulation of axonogenesis		0.001043	1	0.03773	0.3628	16	107	MAP1B,BCL11A,CXCL12,SKIL,GDI1,NEFL,NTRK2,SEMA5A,CDH4,NRG1,CHODL,WNT3,DBN1,DCX,ZEB2,RND2
GO: Biological Process	GO:0060537	muscle tissue development		0.001079	1	0.03889	0.374	49	494	MBNL1,ACTC1,MEF2C,MEIS1,RYR1,FGF2,ZBTB18,SEMA3C,SLC25A4,SKIL,HDAC7,FOXP1,SMO,NCAM1,GJA1,FOXH1,NPHS1,TDGF1,SIRT1,ZFPM2,TGFB2,TGFBR1,GPCPD1,HEY2,PAX3,NRG1,PDGFRA,SAV1,MYOZ1,PLAGL1,PMP22,COL3A1,COL11A1,TENM4,CCM2L,NDRG4,CXADR,PROX1,BOC,DCN,CDON,RARB,AKIRIN1,FOXP2,TSC22D3,RGS2,RGS4,LEF1,EPHB1
GO: Biological Process	GO:0007492	endoderm development		0.001092	1	0.03918	0.3768	27	227	NANOG,ACVR2A,WLS,MMP9,PLPP3,PHLDB1,LDB1,NF2,NODAL,NSD1,TDGF1,OTX2,TP53,APELA,KLF4,HNF4A,KDM6A,COL5A1,COL5A2,COL11A1,COL12A1,WNT3,POU5F1,TENM4,MAP2K5,VANGL2,LEF1
GO: Biological Process	GO:0050919	negative chemotaxis		0.001119	1	0.0398	0.3827	10	51	SEMA3C,SLIT3,NRP2,SEMA4A,SEMA5A,NRG1,FLRT3,SEMA3E,LGR6,EPHA7
GO: Biological Process	GO:0003197	endocardial cushion development		0.001119	1	0.0398	0.3827	10	51	JAG1,MSX1,SNAI2,DCHS1,TGFB2,TGFB3,TGFBR1,THBS1,HEY2,EPHA3
GO: Biological Process	GO:0023057	negative regulation of signaling		0.00117	1	0.04145	0.3986	133	1636	EPHB2,GGNBP2,AMER1,APCDD1,NANOG,MDK,NDRG2,TRDN,FBN1,FBP1,ATXN1,JAG1,NLRC5,FGFR3,MAD2L2,MMP9,FST,BICC1,CXCL12,FOXO1,SFRP5,HYOU1,PYDC1,SKIL,HDAC7,AR,RHOH,KLF7,PYCARD,SLIT3,CXXC4,SNAI2,FOXP1,SMPD1,PRDM14,DKK2,ARHGAP42,UNC5B,FSTL4,BCL2L1,BICD1,SOCS2,NF2,RBMS3,TMEM131L,GNAL,FOXH1,NODAL,NOS1,MCHR1,CNMD,GRIA1,TDGF1,GRM4,NXN,PIAS2,TERT,SIRT1,OPRD1,PTPN5,TGFB2,TGFB3,DNAJA3,TGFBR1,THBS1,DUSP16,CD44,HEY2,PR…
GO: Biological Process	GO:0010035	response to inorganic substance		0.001197	1	0.0422	0.4059	60	638	MAP1B,MB,MECP2,MEF2C,RYR1,SELENOV,PARP1,FBP1,MMP9,FOXO1,CPNE9,TXNIP,MT1B,MT1E,MT1G,MT1H,MT1M,MT1X,SLC25A12,FOXP1,SNCB,ATP12A,BECN1,SPARC,GATM,NCAM1,GDI1,MT1HL1,GIP,NEFL,NFE2L1,KCNMB4,NPTX1,SYT6,TERT,SIRT1,TNFRSF11B,THBS1,GUCA1A,PRDX1,PRKN,TP53,PDE1C,PENK,BACE1,KLF4,PKLR,PLA2G4A,VCAM1,XDH,TESMIN,MAPK13,CYP1B1,CYP27B1,DNMT3A,DPEP1,LCK,RNF146,CBX8,RASGRP2
GO: Biological Process	GO:0010839	negative regulation of keratinocyte proliferation		0.001211	1	0.04252	0.409	5	14	CASK,SNAI2,VDR,EPPK1,PTPRK
GO: Biological Process	GO:0048592	eye morphogenesis		0.001277	1	0.04461	0.429	23	184	EPHB2,MEIS1,FAT1,FBN1,JAG1,FGF2,FGFR3,ATP8A2,PROM1,KDM2B,ZEB1,CALB1,NTRK2,CRB1,OTX2,COL5A1,COL5A2,NKD1,PROX1,FZD5,CDON,RARB,EPHB1
GO: Biological Process	GO:0051495	positive regulation of cytoskeleton organization		0.001281	1	0.04461	0.429	28	241	MAP1B,CCL26,MECP2,BAIAP2L2,ARHGEF15,PYCARD,LIMCH1,NES,IQGAP2,JMY,NF2,GMFB,NPHS1,NPM1,CARMIL2,NTF3,SEMA5A,TERF1,TGFB3,TGFBR1,HCLS1,SYNPO2,VIL1,PROX1,MTSS1,SPIRE1,LPAR1,ARHGEF10L
GO: Biological Process	GO:2000116	regulation of cysteine-type endopeptidase activity		0.001329	1	0.04611	0.4434	30	265	F3,WDR35,MMP9,ALOX12,PYCARD,BBC3,BCL2L1,SYK,NODAL,SIRT1,DNAJA3,THBS1,CD44,CDKN2D,KLF4,NLRC4,PMAIP1,VIL1,XDH,ACVR1C,IFI16,MAP2K5,NLRP12,FAM162A,DPEP1,BCL2L11,UACA,LCK,LEF1,EPHA7
GO: Biological Process	GO:0071559	response to transforming growth factor beta		0.001344	1	0.04642	0.4464	31	277	ACVR1B,ACVR2A,MEF2C,PARP1,FBN1,SKIL,LEFTY1,SOX5,GCNT2,BMPR1B,FOXH1,NODAL,ZEB1,TDGF1,SIRT1,TGFB2,TGFB3,LEFTY2,TGFBR1,THBS1,TP53,PENK,OVOL2,ZFYVE9,COL1A2,COL3A1,MXRA5,ACVR1C,DBN1,PMEPA1,PTPRK
GO: Biological Process	GO:0010822	positive regulation of mitochondrion organization		0.001365	1	0.04695	0.4515	17	120	WDR35,MMP9,USP36,PYCARD,BBC3,PTPN5,PRKN,TP53,HK2,HSPA1L,PMAIP1,TOMM7,ATG13,DCN,FZD5,FAM162A,BCL2L11
GO: Biological Process	GO:0016202	regulation of striated muscle tissue development		0.001374	1	0.04707	0.4526	23	185	MEF2C,MEIS1,FGF2,SLC25A4,HDAC7,FOXP1,NCAM1,GJA1,SIRT1,ZFPM2,TGFBR1,HEY2,NRG1,SAV1,CXADR,BOC,CDON,AKIRIN1,TSC22D3,RGS2,RGS4,LEF1,EPHB1
GO: Biological Process	GO:0003208	cardiac ventricle morphogenesis		0.001383	1	0.04721	0.454	13	80	MEF2C,JAG1,SEMA3C,FOXH1,ZFPM2,TGFB2,TGFBR1,HEY2,NRG1,COL11A1,CPE,CCM2L,PROX1
GO: Biological Process	GO:0050673	epithelial cell proliferation		0.001394	1	0.04726	0.4545	49	500	ACVR2A,MDK,CCL26,F3,MEF2C,ADORA2B,FGF2,FGFR3,FST,CXCL12,VASH1,AR,CASK,SNAI2,UHRF1,FOXP1,SMO,SPARC,NRP2,GJA1,NODAL,NPM1,CNMD,SEMA5A,SIRT1,CCND2,TGFB2,TGFBR1,THBS1,KLK8,SAV1,APELA,OVOL2,FMC1,HPN,VDR,HYAL1,XDH,BCL11B,IGF2,MAP2K5,CXADR,PROX1,EPPK1,MTSS1,PTPRK,FOXP2,VASH2,ZNF304
GO: Biological Process	GO:0021952	central nervous system projection neuron axonogenesis		0.001407	1	0.04726	0.4545	7	28	EPHB2,FBXO45,DCC,DCX,ZEB2,EPHA4,EPHB1
GO: Biological Process	GO:0003272	endocardial cushion formation		0.001407	1	0.04726	0.4545	7	28	MSX1,SNAI2,DCHS1,TGFB2,TGFB3,TGFBR1,HEY2
GO: Biological Process	GO:0060384	innervation		0.001407	1	0.04726	0.4545	7	28	FGFR3,FBXO45,UNC13A,GABRA5,NPTX1,VCAM1,LRIG2
GO: Biological Process	GO:0045165	cell fate commitment		0.001422	1	0.04736	0.4555	35	326	NANOG,MEF2C,JAG1,FGF2,FGFR3,IL23A,AR,PRICKLE2,SMO,PRDM14,SOX5,GAP43,NFE2L1,NODAL,NTF3,TGFB2,TGFBR1,OTX2,HEY2,PAX3,TP53,NRG1,KLF4,PRRX1,WNT3,POU5F1,BCL11B,TENM4,PROX1,PSEN2,FZD5,CDON,TBX22,LHX6,RORA
GO: Biological Process	GO:0097190	apoptotic signaling pathway		0.001428	1	0.04736	0.4555	62	669	ACVR1B,PARP1,WDR35,FGFR3,SRPX,MMP9,CXCL12,TRAF7,HYOU1,USP28,SKIL,ERN2,AR,MSX1,PYCARD,SNAI2,BECN1,BBC3,UNC5B,BCL2L1,JMY,BMPR1B,SGPL1,BTK,TERT,SIRT1,TGFB2,TGFBR1,MSH6,THBS1,CD44,PRKN,TP53,CDKN2D,MPV17L,TRPS1,PMAIP1,VDR,COL2A1,PMP22,CDIP1,AEN,DEPTOR,IFI16,MAP2K5,PRODH,CYP1B1,BCL2L14,PSEN2,ZNF385B,MEIS3,RB1CC1,DCC,PTGIS,ACKR3,SLC35F6,FAM162A,BCL2L11,UACA,PAM16,LCK,RNF41
GO: Biological Process	GO:0006082	organic acid metabolic process		0.001431	1	0.04736	0.4555	104	1238	OLAH,ACADS,ACY1,MECP2,FAAH,FABP6,ACSL3,RIMKLB,FBP1,FGF2,CHST12,ALDH3A2,ALDOC,ALDH6A1,ALOX12,ALOX15B,TPST2,HAGHL,ST6GAL1,APOC1,SEPHS2,SLC7A4,SLC25A12,NR5A2,MPC1,EGFLAM,GLS2,MYO5A,MTHFD2,GATM,GCDH,ALDH1L1,GSTO2,GFPT1,GGT1,CES2,GIP,LDHD,PER2,SULT1A1,NFE2L1,SGPL1,SYK,C3,NOS1,DAGLB,CYP4V2,LIAS,P4HA2,AZIN2,PAPSS2,SIRT1,GSTM4,GCAT,P4HA1,PAH,CD44,SERINC5,TP53,CHP1,TPH1,HYAL4,SDSL,HK2,PFKFB2,PFKL,HNF4A,PR…
GO: Biological Process	GO:0030072	peptide hormone secretion		0.001433	1	0.04736	0.4555	33	302	SLC8B1,SLC25A4,CASK,KLF7,SNAP25,SLC16A10,MYO5A,GIP,GJA1,PASK,PER2,NOS1,GPR27,SIRT1,PRKN,PDE1C,PDE4C,CACNA2D2,PFKFB2,CHGA,PFKL,HNF4A,VSNL1,HTR2C,CPE,ACVR1C,CPT1A,PSMD9,PTPRN2,NADK,GAL,MIDN,SYTL4
GO: Biological Process	GO:0001667	ameboidal-type cell migration		0.001454	1	0.0476	0.4578	49	501	RHOJ,ACTA2,ACVR1B,MECP2,MEF2C,ADORA2B,FGF2,MMP9,ALOX12,CXCL12,SEMA3C,VASH1,HDAC7,PLPP3,SNAI2,FOXP1,SMO,SPARC,NRP2,SGPL1,SEMA4A,NODAL,SEMA5A,TDGF1,SIRT1,TGFB2,TGFBR1,THBS1,PTP4A3,PAX3,ENPP2,APELA,KLF4,OVOL2,PMP22,VIL1,HYAL1,ACVR1C,AKAP12,IGF2,MAP2K5,SEMA3E,PROX1,CYP1B1,EPPK1,DCN,ZEB2,PTPRR,ALX1
GO: Biological Process	GO:0003198	epithelial to mesenchymal transition involved in endocardial cushion formation		0.001462	1	0.0476	0.4578	6	21	MSX1,SNAI2,TGFB2,TGFB3,TGFBR1,HEY2
GO: Biological Process	GO:0003215	cardiac right ventricle morphogenesis		0.001462	1	0.0476	0.4578	6	21	JAG1,SEMA3C,FOXH1,ZFPM2,TGFB2,HEY2
GO: Biological Process	GO:0038092	nodal signaling pathway		0.001462	1	0.0476	0.4578	6	21	ACVR1B,FOXH1,NODAL,TDGF1,TDGF1P3,ACVR1C
GO: Biological Process	GO:0010648	negative regulation of cell communication		0.001478	1	0.04789	0.4606	132	1632	EPHB2,GGNBP2,AMER1,APCDD1,NANOG,MDK,NDRG2,TRDN,FBN1,FBP1,ATXN1,JAG1,NLRC5,FGFR3,MAD2L2,MMP9,FST,BICC1,CXCL12,FOXO1,SFRP5,HYOU1,PYDC1,SKIL,HDAC7,AR,RHOH,KLF7,PYCARD,SLIT3,CXXC4,SNAI2,FOXP1,SMPD1,PRDM14,DKK2,ARHGAP42,UNC5B,FSTL4,BCL2L1,BICD1,SOCS2,NF2,RBMS3,TMEM131L,GNAL,FOXH1,NODAL,NOS1,MCHR1,CNMD,GRIA1,TDGF1,GRM4,NXN,PIAS2,TERT,SIRT1,OPRD1,PTPN5,TGFB2,TGFB3,DNAJA3,TGFBR1,THBS1,DUSP16,CD44,HEY2,PR…
GO: Biological Process	GO:0010837	regulation of keratinocyte proliferation		0.001488	1	0.04789	0.4606	8	36	MDK,CASK,SNAI2,OVOL2,VDR,BCL11B,EPPK1,PTPRK
GO: Biological Process	GO:0051156	glucose 6-phosphate metabolic process		0.001488	1	0.04789	0.4606	8	36	G6PC3,RBKS,NFE2L1,PRKN,HK2,PFKFB2,SHPK,MIDN
GO: Biological Process	GO:0090066	regulation of anatomical structure size		0.001504	1	0.04814	0.4629	56	592	MAP1B,MAP2,ACTA2,BCL11A,CCL26,ADORA2B,WDR35,ULK1,ALOX12,BAIAP2L2,CXCL12,SEMA3C,PYCARD,ARHGAP42,IQGAP2,FSTL4,RAP1GAP2,BBS2,GDI1,JMY,NEFM,GJA1,NEFL,PER2,GMFB,KCNMB4,SEMA4A,NOS1,NPHS1,NPM1,CARMIL2,NRCAM,CAPG,SEMA5A,SIRT1,CDH4,HCLS1,NRG1,CHGA,VIL1,DEPTOR,HTR2C,WNT3,ULK2,SEMA3E,SPIRE1,DBN1,RB1CC1,DCC,DCX,VILL,RAB3B,RAB5A,RGS2,RND2,EPHA7
GO: Biological Process	GO:0050679	positive regulation of epithelial cell proliferation		0.00151	1	0.04814	0.4629	27	232	MDK,CCL26,F3,ADORA2B,FGF2,FGFR3,CXCL12,AR,FOXP1,SMO,NRP2,NODAL,SEMA5A,SIRT1,CCND2,TGFBR1,APELA,HPN,HYAL1,IGF2,MAP2K5,CXADR,PROX1,EPPK1,FOXP2,VASH2,ZNF304
GO: Biological Process	GO:0043408	regulation of MAPK cascade		0.001513	1	0.04814	0.4629	76	857	EPHB2,RAMP3,ACTA2,DNAJC27,NDRG2,CCL26,ADORA2B,SAA1,FGF2,FGFR3,GPNMB,FOXO1,TRAF7,SFRP5,ERN2,AR,ARAF,LEFTY1,PYCARD,SMPD1,GCNT2,NF2,SYK,C3,NQO2,NODAL,CALCR,NTF3,NTRK2,TDGF1,GRM4,PTPN5,TGFB2,TGFB3,LEFTY2,TGFBR1,THBS1,MAP4K1,DUSP16,PRDX1,CD44,CD81,PRKN,LPAR2,PIK3R5,NRG1,PDE6G,PDGFRA,APELA,KLF4,PLA2G2A,HTR2C,XDH,AKAP12,IGF2,MAP2K5,MAP2K6,NDRG4,NLRP12,RB1CC1,DCC,ZEB2,PTPRR,ACKR3,FZD5,LBH,CDON,RGS2,LPAR1…
GO: Biological Process	GO:0060322	head development		0.001563	1	0.04953	0.4763	78	885	EPHB2,MDK,WLS,NDRG2,MECP2,ACSL3,PTCHD1,ATXN1,PCDH19,FGF2,AK4,FGFR3,ULK1,FBXO45,ZBTB18,CXCL12,MSX1,SLIT3,SMO,TMEM108,TBC1D23,GABRA5,NES,BBS2,NCAM1,HESX1,NRP2,NEFL,LDB1,NF2,SGPL1,KDM2B,DCLK2,TAF1,NODAL,CNTN4,NTF3,NTRK2,AKNA,SEMA5A,NR2F1,TGFB2,TGFB3,OTX2,SYNGR3,TP53,NRG1,PDGFRA,HOXB3,FLRT3,COL2A1,COL3A1,WNT3,ZIC1,BCL11B,KNDC1,NDRG4,PROX1,IL11RA,PSEN2,DCX,ZEB2,CDON,FAT4,RARB,BCL2L11,FOXP2,STMN1,LHX6,…
GO: Cellular Component	GO:0000790	nuclear chromatin		3.372e-16	3.382e-13	3.382e-13	2.533e-12	209	1923	DPF1,ZNF93,ZNF391,ZNF549,NANOG,ZFP57,ETV3,BCL11A,ZNF442,MECP2,MEF2C,ZNF568,MYSM1,RXRG,MEIS1,MEIS2,ZNF551,ZNF490,ZIC4,PARP1,SALL2,ZNF530,ZNF589,ZNF766,ZBTB18,ZNF548,ZNF614,FOXO1,KLF11,TEAD2,ZNF674,ZFP30,BEND3,ZNF397,ZNF581,MLXIP,SKIL,ZNF416,AR,DNAJC2,POLR3G,PKNOX2,MSX1,ZBTB44,KLF7,NR5A2,SNAI2,ZSCAN18,HLTF,UHRF1,FOXP1,ZNF701,ZNF565,ZNF700,PRDM14,ZNF583,MYBL2,ZNF44,SOX5,SP4,ZNF266,SPIB,ZNF273,ZNF460…
GO: Cellular Component	GO:0098643	banded collagen fibril		9.609e-07	0.0009638	0.0003213	0.002406	7	11	COL1A2,COL2A1,COL3A1,COL5A1,COL5A2,COL11A1,LUM
GO: Cellular Component	GO:0005583	fibrillar collagen trimer		9.609e-07	0.0009638	0.0003213	0.002406	7	11	COL1A2,COL2A1,COL3A1,COL5A1,COL5A2,COL11A1,LUM
GO: Cellular Component	GO:0098644	complex of collagen trimers		9.174e-06	0.009202	0.0023	0.01723	8	19	COL1A2,COL2A1,COL3A1,COL4A5,COL5A1,COL5A2,COL11A1,LUM
GO: Cellular Component	GO:0031594	neuromuscular junction		3.203e-05	0.03212	0.006425	0.04811	18	98	UNC13A,NEFM,NEFL,GRIA1,DNAJA3,SYNGR3,SYNGR2,NRG1,PLS3,COL4A5,CXADR,KCNC4,TUBA1A,DLG3,LRP4,AKAP1,EPHA4,EPHA7
GO: Cellular Component	GO:0061695	transferase complex, transferring phosphorus-containing groups		0.0001689	0.1694	0.02823	0.2114	34	281	CCNO,ACVR1B,ACVR2A,ULK1,MAD2L2,ATG14,PYDC1,SORBS1,POLR3G,PYCARD,BECN1,HELB,SOCS2,CCNA1,TAF1,TAF4B,TAF7,TAF12,TAF13,TERT,CCND2,TGFBR1,PIK3R5,TP53,CDKN2D,PFKL,PHKA1,POLA1,POLR2D,POLR2G,ACVR1C,PRPS1,ATG13,RB1CC1
GO: Cellular Component	GO:0030427	site of polarized growth		0.0002652	0.266	0.03361	0.2517	29	231	MAP1B,MAP2,NDRG2,SMO,SNAP25,SNCB,FSCN1,INPP5J,GAP43,MYO5A,NCAM1,NEFL,GPM6A,NTRK2,SIRT1,OTX2,PCDH9,HCLS1,FLRT3,CXADR,BOC,DBN1,DCC,DCX,LRIG2,DLG3,TNK2,ENO2,EPHA4
GO: Cellular Component	GO:0030175	filopodium		0.0002705	0.2713	0.03361	0.2517	18	115	MAP2,ACPP,ACTA2,ACTC1,FAT1,SNAP25,FSCN1,GAP43,IQGAP2,MYO5A,NF2,GPM6A,VCAM1,VIL1,CXADR,DBN1,EPHA4,EPHB1
GO: Cellular Component	GO:0099240	intrinsic component of synaptic membrane		0.0003016	0.3025	0.03361	0.2517	30	244	EPHB2,LRRTM4,GPC4,MPP2,LRRC4C,SNAP25,GABRA5,NCAM1,CNTN6,NRP2,SLITRK2,GPM6A,NRCAM,SYT6,GRIA1,GRM4,OPRD1,LPAR2,CDH10,FLRT3,HTR3A,PSEN2,MARCKSL1,DCC,KCNA4,KCNC4,KCND2,EFNB3,EPHA4,EPHA7
GO: Cellular Component	GO:0098978	glutamatergic synapse		0.0003614	0.3624	0.03505	0.2625	52	511	EPHB2,SYN3,ACTC1,NRN1,NDRG2,MECP2,ADORA2B,PPP1R1B,LRRTM4,GPC4,FBXO45,MPP2,VPS18,LRRC4C,SNAP25,UNC13A,FILIP1,SPARC,MYO5A,NCAM1,NRP2,SLITRK2,NOS1,GPM6A,NPTX1,CALB1,NRCAM,NTRK2,SYT6,GRIA1,GRM4,LPAR2,OLFM2,FBXL20,CDH10,NRG1,PLCB4,FLRT3,HTR3A,DNM3,DBN1,KCNA4,KCNC4,KCND2,FZD5,DLG3,DNM1,LCK,EFNB3,EPHA4,EPHA7,EPHB1
GO: Cellular Component	GO:0030426	growth cone		0.0004165	0.4177	0.03505	0.2625	28	226	MAP1B,MAP2,NDRG2,SMO,SNAP25,SNCB,FSCN1,INPP5J,GAP43,MYO5A,NCAM1,NEFL,GPM6A,NTRK2,SIRT1,OTX2,PCDH9,FLRT3,CXADR,BOC,DBN1,DCC,DCX,LRIG2,DLG3,TNK2,ENO2,EPHA4
GO: Cellular Component	GO:0098889	intrinsic component of presynaptic membrane		0.0004536	0.4549	0.03505	0.2625	19	130	EPHB2,GPC4,SNAP25,GABRA5,NCAM1,CNTN6,GPM6A,GRIA1,GRM4,OPRD1,LPAR2,CDH10,HTR3A,PSEN2,MARCKSL1,KCNA4,KCNC4,EFNB3,EPHA4
GO: Cellular Component	GO:0048179	activin receptor complex		0.0004543	0.4557	0.03505	0.2625	4	7	ACVR1B,ACVR2A,TGFBR1,ACVR1C
GO: Cellular Component	GO:0005788	endoplasmic reticulum lumen		0.0005752	0.5769	0.0382	0.2861	35	312	TRDN,F8,MFGE8,FBN1,HYOU1,IL23A,RNASET2,FKBP7,CES2,GIP,C3,P4HA2,ADAMTSL1,GPX7,PRSS23,SERPINH1,THBS1,P4HA1,PENK,BACE1,COL1A2,COL2A1,COL3A1,COL4A5,COL5A1,FKBP10,COL5A2,COL6A3,COL11A1,COL12A1,WNT3,PTPRN2,PCSK9,TSPAN5,RCN3
GO: Cellular Component	GO:0044420	extracellular matrix component		0.0005939	0.5957	0.0382	0.2861	11	56	FBN1,COL1A2,COL2A1,PMP22,COL3A1,COL4A5,COL5A1,COL5A2,COL11A1,COL12A1,LUM
GO: Cellular Component	GO:0097060	synaptic membrane		0.0006094	0.6112	0.0382	0.2861	54	548	EPHB2,LRRTM4,GPC4,TRAPPC4,FBXO45,MPP2,LRRC4C,CASK,TMEM108,SNAP25,UNC13A,GABRA5,GABRP,LHFPL4,NCAM1,CNTN6,NRP2,SLITRK2,DAGLB,GPM6A,NPTX1,NRCAM,NTRK2,SYT6,GRIA1,GRM4,OPRD1,PTPN5,DNAJA3,PRKN,LPAR2,OLFM2,CDH10,FLRT3,HTR3A,CPE,DNM3,PSEN2,LZTS3,MARCKSL1,DBN1,DCC,KCNA4,KCNC4,KCND2,DLG3,DNM1,EFNB3,LRP4,AKAP1,ENO2,EPB41L1,EPHA4,EPHA7
Domain	SM00355	ZnF_C2H2	SMART	3.097e-24	1.42e-20	1.005e-20	9.053e-20	137	810	ZNF93,ZNF391,ZNF549,ZFP57,ZNF571,BCL11A,ZNF442,ZNF568,ZNF551,ZNF490,ZIC4,ZNF773,SALL2,ZNF530,ZNF608,ZNF589,ZNF766,ZBTB18,ZNF548,ZNF614,RNF138,KLF11,ZNF674,ZFP30,ZNF397,ZNF581,ZNF416,ZBTB44,KLF7,SNAI2,ZSCAN18,FOXP1,ZNF701,ZNF565,ZNF700,ZNF542P,PRDM14,ZNF583,ZNF44,SP4,ZNF527,ZNF486,ZNF266,ZNF273,ZNF460,ZNF423,ZNF25,ZNF878,ZNF544,ZFR2,TAX1BP1,ZFP62,ZEB1,ZNF354A,ZNF577,ZSCAN4,ZFPM2,ZNF503,KAT7,ZBTB49…
Domain	IPR015880	Znf_C2H2-like	InterPro	5.311e-24	2.436e-20	1.005e-20	9.053e-20	135	796	ZNF93,ZNF391,ZNF549,ZFP57,ZNF571,BCL11A,ZNF442,ZNF568,ZNF551,ZNF490,ZIC4,ZNF773,SALL2,ZNF530,ZNF608,ZNF589,ZNF766,ZBTB18,ZNF548,ZNF614,RNF138,KLF11,ZNF674,ZFP30,ZNF397,ZNF581,ZNF416,ZBTB44,KLF7,SNAI2,ZSCAN18,FOXP1,ZNF701,ZNF565,ZNF700,PRDM14,ZNF583,ZNF44,SP4,ZNF527,ZNF486,ZNF266,ZNF273,ZNF460,ZNF423,ZNF25,ZNF878,ZNF544,ZFR2,TAX1BP1,ZFP62,ZEB1,ZNF354A,ZNF577,ZSCAN4,ZFPM2,ZNF503,KAT7,ZBTB49,ZSCAN10…
Domain	IPR007087	Znf_C2H2	InterPro	6.574e-24	3.015e-20	1.005e-20	9.053e-20	136	807	ZNF93,ZNF391,ZNF549,ZFP57,ZNF571,BCL11A,ZNF442,ZNF568,ZNF551,ZNF490,ZIC4,ZNF773,SALL2,ZNF530,ZNF608,ZNF589,ZNF766,ZBTB18,ZNF548,ZNF614,RNF138,KLF11,ZNF674,ZFP30,ZNF397,ZNF581,ZNF416,ZBTB44,KLF7,SNAI2,ZSCAN18,FOXP1,ZNF701,ZNF565,ZNF700,ZNF542P,PRDM14,ZNF583,ZNF44,SP4,ZNF527,ZNF486,ZNF266,ZNF273,ZNF460,ZNF423,ZNF25,ZNF878,ZNF544,ZFR2,TAX1BP1,ZFP62,ZEB1,ZNF354A,ZNF577,ZSCAN4,ZFPM2,ZNF503,KAT7,ZBTB49…
Domain	3.30.160.60	-	Gene3D	6.042e-23	2.771e-19	6.927e-20	6.24e-19	120	679	ZNF93,ZNF391,ZNF549,ZFP57,ZNF571,BCL11A,ZNF442,ZNF568,ZNF551,ZNF490,ZIC4,ZNF773,SALL2,ZNF530,ZNF589,ZNF766,ZBTB18,ZNF548,ZNF614,KLF11,ZNF674,ZFP30,ZNF397,ZNF581,ZNF416,ZBTB44,KLF7,SNAI2,ZSCAN18,ZNF701,ZNF565,ZNF700,PRDM14,ZNF583,ZNF44,SP4,ZNF527,ZNF486,ZNF266,ZNF273,ZNF460,ZNF423,ZNF25,ZNF878,ZNF544,ZFP62,ZEB1,ZNF354A,ZNF577,ZSCAN4,ZFPM2,ZNF503,ZBTB49,ZSCAN10,ZNF732,ZNF827,ZNF561,ZNF721,ZNF627,HI…
Domain	PS50157	ZINC_FINGER_C2H2_2	PROSITE	1.395e-22	6.397e-19	1.279e-19	1.153e-18	130	777	ZNF93,ZNF391,ZNF549,ZFP57,ZNF571,BCL11A,ZNF442,ZNF568,ZNF551,ZNF490,ZIC4,ZNF773,SALL2,ZNF530,ZNF608,ZNF589,ZNF766,ZBTB18,ZNF548,ZNF614,KLF11,ZNF674,ZFP30,ZNF397,ZNF581,ZNF416,ZBTB44,KLF7,SNAI2,ZSCAN18,FOXP1,ZNF701,ZNF565,ZNF700,ZNF542P,PRDM14,ZNF583,ZNF44,SP4,ZNF527,ZNF486,ZNF266,ZNF273,ZNF460,ZNF423,ZNF25,ZNF878,ZNF544,ZFP62,ZEB1,ZNF354A,ZNF577,ZSCAN4,ZFPM2,ZNF503,ZBTB49,ZSCAN10,ZNF732,ZNF827,ZN…
Domain	PS00028	ZINC_FINGER_C2H2_1	PROSITE	1.767e-22	8.105e-19	1.351e-19	1.217e-18	130	779	ZNF93,ZNF391,ZNF549,ZFP57,ZNF571,BCL11A,ZNF442,ZNF568,ZNF551,ZNF490,ZIC4,ZNF773,SALL2,ZNF530,ZNF608,ZNF589,ZNF766,ZBTB18,ZNF548,ZNF614,KLF11,ZNF674,ZFP30,ZNF397,ZNF581,ZNF416,ZBTB44,KLF7,SNAI2,ZSCAN18,FOXP1,ZNF701,ZNF565,ZNF700,ZNF542P,PRDM14,ZNF583,ZNF44,SP4,ZNF527,ZNF486,ZNF266,ZNF273,ZNF460,ZNF423,ZNF25,ZNF878,ZNF544,ZFP62,ZEB1,ZNF354A,ZNF577,ZSCAN4,ZFPM2,ZNF503,ZBTB49,ZSCAN10,ZNF732,ZNF827,ZN…
Domain	IPR013087	Znf_C2H2/integrase_DNA-bd	InterPro	4.081e-22	1.871e-18	2.673e-19	2.408e-18	120	694	ZNF93,ZNF391,ZNF549,ZFP57,ZNF571,BCL11A,ZNF442,ZNF568,ZNF551,ZNF490,ZIC4,ZNF773,SALL2,ZNF530,ZNF589,ZNF766,ZBTB18,ZNF548,ZNF614,KLF11,ZNF674,ZFP30,ZNF397,ZNF581,ZNF416,ZBTB44,KLF7,SNAI2,ZSCAN18,ZNF701,ZNF565,ZNF700,PRDM14,ZNF583,ZNF44,SP4,ZNF527,ZNF486,ZNF266,ZNF273,ZNF460,ZNF423,ZNF25,ZNF878,ZNF544,ZFP62,ZEB1,ZNF354A,ZNF577,ZSCAN4,ZFPM2,ZNF503,ZBTB49,ZSCAN10,ZNF732,ZNF827,ZNF561,ZNF721,ZNF627,HI…
Domain	PF00096	zf-C2H2	Pfam	1.429e-21	6.552e-18	8.19e-19	7.377e-18	119	695	ZNF93,ZNF391,ZNF549,ZFP57,ZNF571,BCL11A,ZNF442,ZNF568,ZNF551,ZNF490,ZIC4,ZNF773,SALL2,ZNF530,ZNF589,ZNF766,ZBTB18,ZNF548,ZNF614,KLF11,ZNF674,ZFP30,ZNF397,ZNF581,ZNF416,ZBTB44,KLF7,SNAI2,ZNF701,ZNF565,ZNF700,ZNF542P,PRDM14,ZNF583,ZNF44,SP4,ZNF527,ZNF486,ZNF266,ZNF273,ZNF460,ZNF423,ZNF25,ZNF878,ZNF544,ZFP62,ZNF354A,ZNF577,ZSCAN4,ZFPM2,ZBTB49,ZSCAN10,ZNF732,ZNF827,ZNF525,ZNF561,ZNF721,ZNF627,HIVEP2,…
Domain	PS50805	KRAB	PROSITE	1.906e-14	8.743e-11	9.714e-12	8.751e-11	67	359	ZNF93,ZNF549,ZFP57,ZNF571,ZNF442,ZNF568,ZNF551,ZNF490,ZNF773,ZNF530,ZNF589,ZNF766,ZNF548,ZNF614,ZNF674,ZFP30,KRBOX4,ZNF416,ZNF701,ZNF565,ZNF700,ZNF583,ZNF44,ZNF527,ZNF486,ZNF266,ZNF273,ZNF460,ZNF25,ZNF878,ZNF544,ZNF738,ZNF354A,ZNF577,ZNF732,ZNF561,ZNF627,ZNF235,ZNF441,ZNF836,ZNF610,ZNF550,ZNF257,ZNF324,ZNF3,ZNF7,ZNF10,ZNF17,ZNF18,ZNF100,ZNF540,ZNF432,ZNF75A,ZNF90,ZNF765,ZNF136,ZNF202,ZIK1,ZNF649,…
Domain	PF13912	zf-C2H2_6	Pfam	4.468e-14	2.049e-10	2.049e-11	1.846e-10	61	314	ZNF93,ZNF391,ZNF549,ZNF571,ZNF442,ZNF568,ZNF551,ZNF490,ZNF773,SALL2,ZNF530,ZNF766,ZNF548,ZFP30,ZNF416,ZBTB44,SNAI2,ZNF701,ZNF700,ZNF44,ZNF527,ZNF486,ZNF266,ZNF273,ZNF423,ZNF25,ZNF878,ZFP62,ZNF354A,ZBTB49,ZSCAN10,ZNF732,ZNF561,ZNF721,ZNF627,ZNF836,ZNF324,ZNF345,ZNF574,ZNF10,ZNF16,ZNF17,ZNF100,ZNF540,ZNF432,ZNF75A,ZNF90,ZNF121,ZNF765,ZNF136,ZBTB16,ZNF770,ZSCAN2,ZNF649,ZNF730,ZNF695,ZNF329,ZNF532,ZN…
Domain	PF01352	KRAB	Pfam	6.302e-14	2.89e-10	2.627e-11	2.367e-10	66	359	ZNF93,ZNF549,ZFP57,ZNF571,ZNF442,ZNF568,ZNF551,ZNF490,ZNF773,ZNF530,ZNF589,ZNF766,ZNF548,ZNF614,ZNF674,ZFP30,KRBOX4,ZNF416,ZNF701,ZNF565,ZNF700,ZNF583,ZNF44,ZNF527,ZNF486,ZNF273,ZNF460,ZNF25,ZNF878,ZNF544,ZNF738,ZNF354A,ZNF577,ZNF732,ZNF561,ZNF627,ZNF235,ZNF441,ZNF836,ZNF610,ZNF550,ZNF257,ZNF324,ZNF3,ZNF7,ZNF10,ZNF17,ZNF18,ZNF100,ZNF540,ZNF432,ZNF75A,ZNF90,ZNF765,ZNF136,ZNF202,ZIK1,ZNF649,ZNF730,…
Domain	SM00349	KRAB	SMART	8.596e-14	3.942e-10	3.285e-11	2.959e-10	67	370	ZNF93,ZNF549,ZFP57,ZNF571,ZNF442,ZNF568,ZNF551,ZNF490,ZNF773,ZNF530,ZNF589,ZNF766,ZNF548,ZNF614,ZNF674,ZFP30,KRBOX4,ZNF416,ZNF701,ZNF565,ZNF700,ZNF583,ZNF44,ZNF527,ZNF486,ZNF266,ZNF273,ZNF460,ZNF25,ZNF878,ZNF544,ZNF738,ZNF354A,ZNF577,ZNF732,ZNF561,ZNF627,ZNF235,ZNF441,ZNF836,ZNF610,ZNF550,ZNF257,ZNF324,ZNF3,ZNF7,ZNF10,ZNF17,ZNF18,ZNF100,ZNF540,ZNF432,ZNF75A,ZNF90,ZNF765,ZNF136,ZNF202,ZIK1,ZNF649,…
Domain	IPR001909	KRAB	InterPro	9.821e-14	4.504e-10	3.465e-11	3.121e-10	67	371	ZNF93,ZNF549,ZFP57,ZNF571,ZNF442,ZNF568,ZNF551,ZNF490,ZNF773,ZNF530,ZNF589,ZNF766,ZNF548,ZNF614,ZNF674,ZFP30,KRBOX4,ZNF416,ZNF701,ZNF565,ZNF700,ZNF583,ZNF44,ZNF527,ZNF486,ZNF266,ZNF273,ZNF460,ZNF25,ZNF878,ZNF544,ZNF738,ZNF354A,ZNF577,ZNF732,ZNF561,ZNF627,ZNF235,ZNF441,ZNF836,ZNF610,ZNF550,ZNF257,ZNF324,ZNF3,ZNF7,ZNF10,ZNF17,ZNF18,ZNF100,ZNF540,ZNF432,ZNF75A,ZNF90,ZNF765,ZNF136,ZNF202,ZIK1,ZNF649,…
Domain	IPR017854	Metalthion_dom	InterPro	3.668e-06	0.01682	0.001051	0.009471	7	12	MT1B,MT1E,MT1G,MT1H,MT1M,MT1X,MT1HL1
Domain	IPR023587	Metalthion_dom_vert	InterPro	3.668e-06	0.01682	0.001051	0.009471	7	12	MT1B,MT1E,MT1G,MT1H,MT1M,MT1X,MT1HL1
Domain	4.10.10.10	-	Gene3D	3.668e-06	0.01682	0.001051	0.009471	7	12	MT1B,MT1E,MT1G,MT1H,MT1M,MT1X,MT1HL1
Domain	PF00131	Metallothio	Pfam	1.409e-05	0.06463	0.003402	0.03064	7	14	MT1B,MT1E,MT1G,MT1H,MT1M,MT1X,MT1HL1
Domain	IPR000006	Metalthion_vert	InterPro	1.409e-05	0.06463	0.003402	0.03064	7	14	MT1B,MT1E,MT1G,MT1H,MT1M,MT1X,MT1HL1
Domain	IPR003019	Metalthion	InterPro	1.409e-05	0.06463	0.003402	0.03064	7	14	MT1B,MT1E,MT1G,MT1H,MT1M,MT1X,MT1HL1
Domain	IPR018064	Metalthion_vert_metal_BS	InterPro	1.546e-05	0.07089	0.003545	0.03193	6	10	MT1B,MT1E,MT1G,MT1H,MT1M,MT1X
Domain	PF01410	COLFI	Pfam	3.206e-05	0.147	0.005881	0.05298	6	11	COL1A2,COL2A1,COL3A1,COL5A1,COL5A2,COL11A1
Domain	IPR000885	Fib_collagen_C	InterPro	3.206e-05	0.147	0.005881	0.05298	6	11	COL1A2,COL2A1,COL3A1,COL5A1,COL5A2,COL11A1
Domain	SM00038	COLFI	SMART	3.206e-05	0.147	0.005881	0.05298	6	11	COL1A2,COL2A1,COL3A1,COL5A1,COL5A2,COL11A1
Domain	PS51461	NC1_FIB	PROSITE	3.206e-05	0.147	0.005881	0.05298	6	11	COL1A2,COL2A1,COL3A1,COL5A1,COL5A2,COL11A1
Domain	PD002078	Fib_collagen_C	ProDom	3.206e-05	0.147	0.005881	0.05298	6	11	COL1A2,COL2A1,COL3A1,COL5A1,COL5A2,COL11A1
Domain	PF16493	Meis_PKNOX_N	Pfam	9.77e-05	0.448	0.01659	0.1495	4	5	MEIS1,MEIS2,PKNOX2,MEIS3
Domain	IPR032453	PKNOX/Meis_N	InterPro	9.77e-05	0.448	0.01659	0.1495	4	5	MEIS1,MEIS2,PKNOX2,MEIS3
Domain	PS00203	METALLOTHIONEIN_VRT	PROSITE	0.0001059	0.4854	0.01734	0.1562	6	13	MT1B,MT1E,MT1G,MT1H,MT1M,MT1X
Domain	SM01411	Ephrin_rec_like	SMART	0.000161	0.7385	0.02003	0.1804	8	25	EPHB2,SVEP1,TNFRSF11B,EPHA3,EPHA4,EPHA7,EPHA8,EPHB1
Domain	IPR011641	Tyr-kin_ephrin_A/B_rcpt-like	InterPro	0.000161	0.7385	0.02003	0.1804	8	25	EPHB2,SVEP1,TNFRSF11B,EPHA3,EPHA4,EPHA7,EPHA8,EPHB1
Domain	IPR001426	Tyr_kinase_rcpt_V_CS	InterPro	0.0001747	0.801	0.02003	0.1804	6	14	EPHB2,EPHA3,EPHA4,EPHA7,EPHA8,EPHB1
Domain	IPR001090	Ephrin_rcpt_lig-bd_dom	InterPro	0.0001747	0.801	0.02003	0.1804	6	14	EPHB2,EPHA3,EPHA4,EPHA7,EPHA8,EPHB1
Domain	IPR016257	Tyr_kinase_ephrin_rcpt	InterPro	0.0001747	0.801	0.02003	0.1804	6	14	EPHB2,EPHA3,EPHA4,EPHA7,EPHA8,EPHB1
Domain	SM00615	EPH_lbd	SMART	0.0001747	0.801	0.02003	0.1804	6	14	EPHB2,EPHA3,EPHA4,EPHA7,EPHA8,EPHB1
Domain	PS00791	RECEPTOR_TYR_KIN_V_2	PROSITE	0.0001747	0.801	0.02003	0.1804	6	14	EPHB2,EPHA3,EPHA4,EPHA7,EPHA8,EPHB1
Domain	PF14575	EphA2_TM	Pfam	0.0001747	0.801	0.02003	0.1804	6	14	EPHB2,EPHA3,EPHA4,EPHA7,EPHA8,EPHB1
Domain	PS00790	RECEPTOR_TYR_KIN_V_1	PROSITE	0.0001747	0.801	0.02003	0.1804	6	14	EPHB2,EPHA3,EPHA4,EPHA7,EPHA8,EPHB1
Domain	PF01404	Ephrin_lbd	Pfam	0.0001747	0.801	0.02003	0.1804	6	14	EPHB2,EPHA3,EPHA4,EPHA7,EPHA8,EPHB1
Domain	IPR027936	Eph_TM	InterPro	0.0001747	0.801	0.02003	0.1804	6	14	EPHB2,EPHA3,EPHA4,EPHA7,EPHA8,EPHB1
Domain	PS51550	EPH_LBD	PROSITE	0.0001747	0.801	0.02003	0.1804	6	14	EPHB2,EPHA3,EPHA4,EPHA7,EPHA8,EPHB1
Domain	PF07679	I-set	Pfam	0.0001907	0.8744	0.02082	0.1875	27	190	FGFR3,SEMA3C,LRRC4C,UNC5B,FSTL4,NCAM1,CNTN6,NPHS1,CNTN4,ADAMTSL1,NRCAM,NTRK2,LINGO1,NRG1,PDGFRA,NEGR1,VCAM1,MXRA5,VSIG10,CXADR,BOC,ISLR,DCC,LRIG2,PTPRK,CDON,LSAMP
Domain	IPR013098	Ig_I-set	InterPro	0.0001907	0.8744	0.02082	0.1875	27	190	FGFR3,SEMA3C,LRRC4C,UNC5B,FSTL4,NCAM1,CNTN6,NPHS1,CNTN4,ADAMTSL1,NRCAM,NTRK2,LINGO1,NRG1,PDGFRA,NEGR1,VCAM1,MXRA5,VSIG10,CXADR,BOC,ISLR,DCC,LRIG2,PTPRK,CDON,LSAMP
Domain	IPR000472	Activin_recp	InterPro	0.0002624	1	0.02735	0.2463	5	10	ACVR1B,ACVR2A,BMPR1B,TGFBR1,ACVR1C
Domain	PF01064	Activin_recp	Pfam	0.0002624	1	0.02735	0.2463	5	10	ACVR1B,ACVR2A,BMPR1B,TGFBR1,ACVR1C
Pathway	1269650	Generic Transcription Pathway	BioSystems: REACTOME	5.951e-08	0.0001482	0.0001482	0.001245	100	879	ZNF549,ZNF571,ZNF442,ZNF568,RXRG,ZNF551,ZNF490,PARP1,ZNF773,ZNF530,ZNF589,ZNF548,ZNF614,TEAD2,ZFP30,KRBOX4,SKIL,ZNF416,AR,NR5A2,ZNF701,ZNF565,ZNF700,BBC3,ZNF583,MYBL2,BRPF3,ZNF486,GLS2,ZNF266,ZNF273,ZNF460,BARD1,ZNF25,JMY,ZNF544,SURF1,CCNA1,TAF1,TAF4B,TAF7,TAF12,TAF13,ZNF738,NPM1,ZNF354A,ZNF577,NR2F1,ZNF732,PRDX1,ZNF561,ZNF721,CDC25C,TP53,ZNF627,ZNF235,HNF4A,NLRC4,ZNF441,ZNF610,ZNF550,COX5A,ZNF25…
Pathway	1270344	Regulation of signaling by NODAL	BioSystems: REACTOME	1.483e-07	0.0003695	0.0001847	0.001551	8	12	ACVR1B,ACVR2A,LEFTY1,NODAL,TDGF1,TDGF1P3,LEFTY2,ACVR1C
Pathway	1270346	Transcriptional regulation of pluripotent stem cells	BioSystems: REACTOME	2.604e-07	0.0006487	0.0002162	0.001816	13	36	NANOG,FGF2,FOXP1,PRDM14,TDGF1,ZSCAN10,PBX1,KLF4,POLR2D,POLR2G,POU5F1,SALL4,DPPA4
Pathway	1270343	Signaling by NODAL	BioSystems: REACTOME	3.565e-06	0.008881	0.00222	0.01864	9	21	ACVR1B,ACVR2A,LEFTY1,FOXH1,NODAL,TDGF1,TDGF1P3,LEFTY2,ACVR1C
Pathway	1339157	Response to metal ions	BioSystems: REACTOME	3e-05	0.07474	0.01246	0.1046	6	11	MT1B,MT1E,MT1G,MT1H,MT1M,MT1X
Pathway	1339158	Metallothioneins bind metals	BioSystems: REACTOME	3e-05	0.07474	0.01246	0.1046	6	11	MT1B,MT1E,MT1G,MT1H,MT1M,MT1X
Pathway	1270347	POU5F1 (OCT4), SOX2, NANOG activate genes related to proliferation	BioSystems: REACTOME	9.922e-05	0.2471	0.03531	0.2965	6	13	NANOG,FGF2,TDGF1,POU5F1,SALL4,DPPA4

## Sheet: ToppFun_cluster2
Category	ID	Name	Source	p-value	q-value Bonferroni	q-value FDR B&H	q-value FDR B&Y	Hit Count in Query List	Hit Count in Genome	Hit in Query List
GO: Molecular Function	GO:0003723	RNA binding		3.675e-18	5.74e-15	5.74e-15	4.553e-14	198	1973	NUSAP1,MRPL23,RIDA,ZNF326,RPL34,RPL36A,ERH,FBL,RPS2,STRBP,RBM10,MRM1,SMC1A,RPS7,RPS10,MDH2,NPM3,NUFIP1,MCTS2P,TUBA1B,TUBB4B,RACK1,MRPS17,NAF1,RPF2,RBM14,EMG1,NOL7,RPL22L1,FKBP3,FLNA,MYBBP1A,XRN2,NAA15,SRSF1,SRSF7,NOP16,RNASEH2A,MRPL13,PHF6,SHMT1,APEX1,MRPL28,PPHLN1,C7orf50,CMSS1,LYAR,RPUSD1,TBL3,KHSRP,MSN,SRRT,RAD51AP1,PELP1,CCT5,TSR1,NUDT1,TRIM32,FRG1,PUS1,EIF3B,FUS,SNRPA,SNRPB,SNRPD1,SNRPF,SNTB…
GO: Molecular Function	GO:0140097	catalytic activity, acting on DNA		3.33e-15	5.202e-12	2.601e-12	2.063e-11	61	364	ERCC1,ERCC2,BRIP1,MCM2,MCM3,MCM5,MCM6,MCM7,ZRANB3,CDC45,NAF1,FEN1,RAD54L,MRE11,XRN2,APEX1,GINS4,CCT7,RUVBL1,CCT5,GINS2,MYC,ATRX,MCM8,BRCA1,NTHL1,NCAPH,OGG1,EXO1,TOP2A,PCNA,AURKB,HMGB1,HMGB2,POLA2,HNRNPA1,HNRNPA2B1,RECQL4,RAD54B,DSCC1,POLD1,POLE2,XRCC5,IL6,EME1,ACD,ERCC6L,GINS1,DHX9,DFFA,TELO2,PINX1,DNA2,DNMT3B,RAD51,WRAP53,RFC4,RFC5,LIG1,G3BP1,TRIM28
GO: Molecular Function	GO:0008094	DNA-dependent ATPase activity		1.324e-14	2.068e-11	6.894e-12	5.468e-11	33	124	ERCC2,BRIP1,MCM2,MCM3,MCM5,MCM6,MCM7,ZRANB3,CDC45,RAD54L,MRE11,TTF2,GINS4,MSH2,RUVBL1,SMARCA2,GINS2,ATRX,MCM8,NCAPH,TOP2A,RECQL4,RAD54B,DSCC1,XRCC5,ERCC6L,GINS1,DHX9,DNA2,RAD51,RFC4,RFC5,G3BP1
GO: Molecular Function	GO:0003678	DNA helicase activity		5.537e-14	8.649e-11	2.162e-11	1.715e-10	27	87	ERCC2,BRIP1,MCM2,MCM3,MCM5,MCM6,MCM7,ZRANB3,CDC45,MRE11,GINS4,RUVBL1,GINS2,ATRX,MCM8,RECQL4,RAD54B,DSCC1,XRCC5,ERCC6L,GINS1,DHX9,DNA2,RAD51,RFC4,RFC5,G3BP1
GO: Molecular Function	GO:0004386	helicase activity		2.35e-13	3.671e-10	7.343e-11	5.824e-10	38	177	ERCC2,BRIP1,MCM2,MCM3,MCM5,MCM6,MCM7,ZRANB3,CDC45,RAD54L,MRE11,TTF2,GINS4,MSH2,FANCM,RUVBL1,SMARCA2,GINS2,ATRX,MCM8,SSBP1,DDX18,HELLS,RECQL4,RAD54B,DSCC1,XRCC5,ERCC6L,EIF4A3,DHX33,GINS1,DHX9,DNA2,RAD51,RFC4,RFC5,G3BP1,DDX39A
GO: Molecular Function	GO:0016462	pyrophosphatase activity		8.908e-12	1.391e-08	1.92e-09	1.523e-08	143	1485	TBC1D19,RAB19,KIF18A,MTG1,SPRY1,ERCC2,BRIP1,ABR,ATAD5,MCM2,MCM3,MCM5,MCM6,MCM7,RRAGB,KATNAL1,RTKN,F2R,F2RL1,FAM13B,ZRANB3,TBC1D24,CDC45,TUBA1B,TUBB4B,DLC1,RACK1,SRGAP1,FGD1,AKT2,SIPA1L2,RAD54L,MRE11,TTF2,ABCC1,TUBB,ARFGEF1,GINS4,MSH2,FANCM,ARF5,ARHGAP4,ARL2,ATP2C1,RUVBL1,TSR1,NUDT1,MTOR,MYO1F,SMARCA2,GINS2,ATP1B1,SOD1,ATP5F1D,ATP5MC1,ATP5MC3,ATP7A,ATP5PO,ATRX,MCM8,MYO9A,GARS1,LHPP,SSBP1,ASAP2,MDN…
GO: Molecular Function	GO:0016817	hydrolase activity, acting on acid anhydrides		9.836e-12	1.536e-08	1.92e-09	1.523e-08	143	1487	TBC1D19,RAB19,KIF18A,MTG1,SPRY1,ERCC2,BRIP1,ABR,ATAD5,MCM2,MCM3,MCM5,MCM6,MCM7,RRAGB,KATNAL1,RTKN,F2R,F2RL1,FAM13B,ZRANB3,TBC1D24,CDC45,TUBA1B,TUBB4B,DLC1,RACK1,SRGAP1,FGD1,AKT2,SIPA1L2,RAD54L,MRE11,TTF2,ABCC1,TUBB,ARFGEF1,GINS4,MSH2,FANCM,ARF5,ARHGAP4,ARL2,ATP2C1,RUVBL1,TSR1,NUDT1,MTOR,MYO1F,SMARCA2,GINS2,ATP1B1,SOD1,ATP5F1D,ATP5MC1,ATP5MC3,ATP7A,ATP5PO,ATRX,MCM8,MYO9A,GARS1,LHPP,SSBP1,ASAP2,MDN…
GO: Molecular Function	GO:0016818	hydrolase activity, acting on acid anhydrides, in phosphorus-containing anhydrides		9.836e-12	1.536e-08	1.92e-09	1.523e-08	143	1487	TBC1D19,RAB19,KIF18A,MTG1,SPRY1,ERCC2,BRIP1,ABR,ATAD5,MCM2,MCM3,MCM5,MCM6,MCM7,RRAGB,KATNAL1,RTKN,F2R,F2RL1,FAM13B,ZRANB3,TBC1D24,CDC45,TUBA1B,TUBB4B,DLC1,RACK1,SRGAP1,FGD1,AKT2,SIPA1L2,RAD54L,MRE11,TTF2,ABCC1,TUBB,ARFGEF1,GINS4,MSH2,FANCM,ARF5,ARHGAP4,ARL2,ATP2C1,RUVBL1,TSR1,NUDT1,MTOR,MYO1F,SMARCA2,GINS2,ATP1B1,SOD1,ATP5F1D,ATP5MC1,ATP5MC3,ATP7A,ATP5PO,ATRX,MCM8,MYO9A,GARS1,LHPP,SSBP1,ASAP2,MDN…
GO: Molecular Function	GO:0017111	nucleoside-triphosphatase activity		7.758e-11	1.212e-07	1.346e-08	1.068e-07	136	1431	TBC1D19,RAB19,KIF18A,MTG1,SPRY1,ERCC2,BRIP1,ABR,ATAD5,MCM2,MCM3,MCM5,MCM6,MCM7,RRAGB,KATNAL1,RTKN,F2R,F2RL1,FAM13B,ZRANB3,TBC1D24,CDC45,TUBA1B,TUBB4B,DLC1,RACK1,SRGAP1,FGD1,AKT2,SIPA1L2,RAD54L,MRE11,TTF2,ABCC1,TUBB,ARFGEF1,GINS4,MSH2,FANCM,ARF5,ARHGAP4,ARL2,ATP2C1,RUVBL1,TSR1,NUDT1,MTOR,MYO1F,SMARCA2,GINS2,ATP1B1,SOD1,ATP5F1D,ATP5MC1,ATP5MC3,ATP7A,ATP5PO,ATRX,MCM8,MYO9A,SSBP1,ASAP2,MDN1,DDX18,GTP…
GO: Molecular Function	GO:0042623	ATPase activity, coupled		1.46e-10	2.28e-07	2.28e-08	1.808e-07	47	308	KIF18A,ERCC2,BRIP1,ATAD5,MCM2,MCM3,MCM5,MCM6,MCM7,KATNAL1,ZRANB3,CDC45,RAD54L,MRE11,TTF2,GINS4,MSH2,FANCM,RUVBL1,SMARCA2,GINS2,ATRX,MCM8,SSBP1,DDX18,NCAPH,TOP2A,HELLS,RECQL4,RAD54B,DSCC1,XRCC5,ERCC6L,EIF4A3,DHX33,GINS1,DHX9,DNA2,KIF11,RAD51,WDR34,DYNC2H1,RFC4,RFC5,G3BP1,DDX39A,HSPA14
GO: Molecular Function	GO:0003688	DNA replication origin binding		1.87e-10	2.921e-07	2.592e-08	2.055e-07	13	26	MCM2,MCM3,MCM5,MCM6,MCM7,MCM10,CDC45,MCM8,ORC2,CDC6,ORC6,DHX9,CDT1
GO: Molecular Function	GO:0035639	purine ribonucleoside triphosphate binding		1.991e-10	3.11e-07	2.592e-08	2.055e-07	163	1841	EPHB6,PI4K2B,RAB19,KIF18A,MTG1,ERCC2,BRIP1,ATAD5,MAT1A,SMC1A,ACTA1,MCM2,MCM3,MCM5,MCM6,MCM7,RRAGB,KATNAL1,RTKN,ZRANB3,EHD2,TUBA1B,TUBB4B,FES,AKT2,FGFR2,MERTK,POMK,TIMM44,RAD54L,TTF2,ABCC1,SCG5,TUBB,MAGI3,CCT7,MSH2,SMC2,FANCM,PAICS,ARF5,SEPHS1,ARL2,ATP2C1,RUVBL1,UBE2T,CCT5,TSR1,MTHFD1,MTOR,MYO1F,SMARCA2,ATP1B1,MAP3K21,PLK4,ATP5F1D,STK36,ATP7A,ATRX,MCM8,MYO9A,AXL,GARS1,NARS1,DYRK4,TTLL12,AURKA,BMPR…
GO: Molecular Function	GO:0032555	purine ribonucleotide binding		3.677e-10	5.743e-07	4.418e-08	3.504e-07	168	1930	EPHB6,PI4K2B,RAB19,KIF18A,MTG1,ERCC2,BRIP1,ATAD5,MAT1A,SMC1A,ACTA1,MCM2,MCM3,MCM5,MCM6,MCM7,RRAGB,KATNAL1,RTKN,ZRANB3,EHD2,TUBA1B,TUBB4B,FES,AKT2,FGFR2,MERTK,POMK,TIMM44,RAD54L,TTF2,ABCC1,SCG5,TUBB,MAGI3,CCT7,MSH2,SMC2,APRT,FANCM,PAICS,ARF5,SEPHS1,ARL2,ATP2C1,RUVBL1,UBE2T,CCT5,TSR1,MTHFD1,MTOR,MYO1F,SMARCA2,ATP1B1,MAP3K21,PLK4,ATP5F1D,STK36,ATP7A,ATRX,MCM8,MYO9A,AXL,GARS1,NARS1,DYRK4,SUCLG1,TTLL1…
GO: Molecular Function	GO:0017076	purine nucleotide binding		4.683e-10	7.315e-07	5.105e-08	4.049e-07	169	1951	EPHB6,PI4K2B,RAB19,KIF18A,MTG1,ERCC2,BRIP1,ATAD5,MAT1A,SMC1A,ACTA1,MCM2,MCM3,MCM5,MCM6,MCM7,RRAGB,KATNAL1,RTKN,ZRANB3,EHD2,TUBA1B,TUBB4B,FES,AKT2,FGFR2,MERTK,POMK,TIMM44,RAD54L,TTF2,ABCC1,SCG5,TUBB,MAGI3,CCT7,MSH2,SMC2,APRT,FANCM,PAICS,ARF5,SEPHS1,ARL2,ATP2C1,RUVBL1,UBE2T,CCT5,TSR1,MTHFD1,MTOR,MYO1F,SMARCA2,ATP1B1,MAP3K21,PLK4,ATP5F1D,STK36,ATP7A,ATRX,MCM8,MYO9A,AXL,GARS1,NARS1,DYRK4,SUCLG1,TTLL1…
GO: Molecular Function	GO:0003697	single-stranded DNA binding		4.902e-10	7.657e-07	5.105e-08	4.049e-07	27	124	ERCC1,MCM2,MCM3,MCM5,MCM6,MCM7,MCM10,CDC45,MSH2,SMC2,NUP35,RAD51AP1,MCM8,SSBP1,YBX1,HMGB1,HMGB2,HNRNPA1,HNRNPA2B1,NUCKS1,PRIM1,ACD,DHX9,RAD51,LRPPRC,ALYREF,RPA3
GO: Molecular Function	GO:0032553	ribonucleotide binding		7.153e-10	1.117e-06	6.983e-08	5.538e-07	168	1947	EPHB6,PI4K2B,RAB19,KIF18A,MTG1,ERCC2,BRIP1,ATAD5,MAT1A,SMC1A,ACTA1,MCM2,MCM3,MCM5,MCM6,MCM7,RRAGB,KATNAL1,RTKN,ZRANB3,EHD2,TUBA1B,TUBB4B,FES,AKT2,FGFR2,MERTK,POMK,TIMM44,RAD54L,TTF2,ABCC1,SCG5,TUBB,MAGI3,CCT7,MSH2,SMC2,APRT,FANCM,PAICS,ARF5,SEPHS1,ARL2,ATP2C1,RUVBL1,UBE2T,CCT5,TSR1,MTHFD1,MTOR,MYO1F,SMARCA2,ATP1B1,MAP3K21,PLK4,ATP5F1D,STK36,ATP7A,ATRX,MCM8,MYO9A,AXL,GARS1,NARS1,DYRK4,SUCLG1,TTLL1…
GO: Molecular Function	GO:0005524	ATP binding		9.328e-10	1.457e-06	8.571e-08	6.798e-07	136	1485	EPHB6,PI4K2B,KIF18A,ERCC2,BRIP1,ATAD5,MAT1A,SMC1A,ACTA1,MCM2,MCM3,MCM5,MCM6,MCM7,KATNAL1,ZRANB3,EHD2,FES,AKT2,FGFR2,MERTK,POMK,TIMM44,RAD54L,TTF2,ABCC1,MAGI3,CCT7,MSH2,SMC2,FANCM,PAICS,SEPHS1,ATP2C1,RUVBL1,UBE2T,CCT5,MTHFD1,MTOR,MYO1F,SMARCA2,ATP1B1,MAP3K21,PLK4,ATP5F1D,STK36,ATP7A,ATRX,MCM8,MYO9A,AXL,GARS1,NARS1,DYRK4,TTLL12,AURKA,BMPR1A,MDN1,DDX18,GLUD1,BUB1,BUB1B,ACSF3,UBE2S,NME2,KIF2C,MARS2,C…
GO: Molecular Function	GO:0008301	DNA binding, bending		1.827e-09	2.854e-06	1.586e-07	1.258e-06	38	236	NUSAP1,CHAF1B,MIS18BP1,CENPW,HJURP,MCM2,CENPP,SMC2,RUVBL1,CENPI,SMARCA2,CDCA5,SOX9,CENPN,ATRX,NAP1L1,NASP,CENPK,CDAN1,NCAPG,PSME4,NCAPD3,MIS18A,NCAPH,TFAM,H2AX,CDK1,TOP2A,HELLS,HMGB1,OIP5,HMGB2,CENPM,SMYD3,PAF1,CENPH,NCAPG2,CENPU
GO: Molecular Function	GO:0030554	adenyl nucleotide binding		2.521e-09	3.938e-06	1.914e-07	1.518e-06	140	1566	EPHB6,PI4K2B,KIF18A,ERCC2,BRIP1,ATAD5,MAT1A,SMC1A,ACTA1,MCM2,MCM3,MCM5,MCM6,MCM7,KATNAL1,ZRANB3,EHD2,FES,AKT2,FGFR2,MERTK,POMK,TIMM44,RAD54L,TTF2,ABCC1,MAGI3,CCT7,MSH2,SMC2,APRT,FANCM,PAICS,SEPHS1,ATP2C1,RUVBL1,UBE2T,CCT5,MTHFD1,MTOR,MYO1F,SMARCA2,ATP1B1,MAP3K21,PLK4,ATP5F1D,STK36,ATP7A,ATRX,MCM8,MYO9A,AXL,GARS1,NARS1,DYRK4,TTLL12,AURKA,BMPR1A,MDN1,DDX18,GLUD1,BUB1,BUB1B,ACSF3,UBE2S,NME2,KIF2C,MA…
GO: Molecular Function	GO:0043138	3'-5' DNA helicase activity		2.556e-09	3.992e-06	1.914e-07	1.518e-06	11	21	MCM2,MCM5,MCM6,MCM7,CDC45,GINS4,RUVBL1,GINS2,RECQL4,GINS1,DHX9
GO: Molecular Function	GO:0016887	ATPase activity		2.574e-09	4.02e-06	1.914e-07	1.518e-06	69	596	KIF18A,ERCC2,BRIP1,ATAD5,MCM2,MCM3,MCM5,MCM6,MCM7,KATNAL1,ZRANB3,CDC45,RAD54L,MRE11,TTF2,ABCC1,GINS4,MSH2,FANCM,ATP2C1,RUVBL1,SMARCA2,GINS2,ATP1B1,ATP5F1D,ATP5MC1,ATP5MC3,ATP7A,ATP5PO,ATRX,MCM8,SSBP1,MDN1,DDX18,KIF2C,VMA21,NCAPH,TMSB4X,TOP2A,HELLS,PFN1,RECQL4,RAD54B,ABCC2,DSCC1,PMS1,KIF23,XRCC5,ERCC6L,EIF4A3,KIF4A,DHX33,GINS1,DHX9,KIF15,DNA2,KIF11,KIFC1,KIF22,RAD51,WDR34,DYNC2H1,DNAJB6,RFC4,RFC5,…
GO: Molecular Function	GO:0032559	adenyl ribonucleotide binding		2.923e-09	4.566e-06	2.076e-07	1.646e-06	139	1555	EPHB6,PI4K2B,KIF18A,ERCC2,BRIP1,ATAD5,MAT1A,SMC1A,ACTA1,MCM2,MCM3,MCM5,MCM6,MCM7,KATNAL1,ZRANB3,EHD2,FES,AKT2,FGFR2,MERTK,POMK,TIMM44,RAD54L,TTF2,ABCC1,MAGI3,CCT7,MSH2,SMC2,APRT,FANCM,PAICS,SEPHS1,ATP2C1,RUVBL1,UBE2T,CCT5,MTHFD1,MTOR,MYO1F,SMARCA2,ATP1B1,MAP3K21,PLK4,ATP5F1D,STK36,ATP7A,ATRX,MCM8,MYO9A,AXL,GARS1,NARS1,DYRK4,TTLL12,AURKA,BMPR1A,MDN1,DDX18,GLUD1,BUB1,BUB1B,ACSF3,UBE2S,NME2,KIF2C,MA…
GO: Molecular Function	GO:0008144	drug binding		1.313e-08	2.051e-05	8.916e-07	7.072e-06	152	1785	EPHB6,PI4K2B,KIF18A,ERCC2,BRIP1,ATAD5,MAT1A,SMC1A,ACTA1,MCM2,MCM3,MCM5,MCM6,MCM7,KATNAL1,ZRANB3,EHD2,FES,AKT2,FGFR2,MERTK,POMK,TIMM44,FKBP3,FKBP5,RAD54L,TTF2,ABCC1,SHMT1,MAGI3,CCT7,MSH2,SMC2,APRT,FANCM,PAICS,SEPHS1,ATP2C1,RUVBL1,UBE2T,CCT5,MTHFD1,MTOR,MYO1F,SMARCA2,ATP1B1,MAP3K21,PLK4,ATP5F1D,STK36,ATP7A,ATP5PO,ATRX,MCM8,MYO9A,AXL,GARS1,NARS1,DYRK4,TTLL12,AURKA,BMPR1A,MDN1,GLDC,DDX18,GLUD1,BUB1,B…
GO: Molecular Function	GO:0017116	single-stranded DNA helicase activity		2.488e-08	3.886e-05	1.619e-06	1.284e-05	10	20	MCM2,MCM5,MCM6,MCM7,DSCC1,DHX9,DNA2,RAD51,RFC4,RFC5
GO: Molecular Function	GO:0003684	damaged DNA binding		5.814e-08	9.082e-05	3.633e-06	2.881e-05	17	66	ERCC1,ERCC2,FANCG,FEN1,APEX1,MSH2,BRCA1,OGG1,H2AX,PCNA,HMGB1,HMGB2,AUNIP,RECQL4,POLD1,XRCC5,RPA3
GO: Molecular Function	GO:0015631	tubulin binding		6.122e-07	0.0009563	3.678e-05	0.0002917	46	388	NUSAP1,KIF18A,MAP9,STRBP,KATNAL1,WDR54,NDC80,FAM161A,FES,CAMSAP1,IFT74,IFT81,PHF6,BIRC5,SPAG5,CCT5,CEP70,CACYBP,CENPJ,GAPDH,BRCA1,PSRC1,KIF2C,OGG1,B9D2,SKA1,AURKB,CETN3,PLK1,KIF23,PIFO,NDE1,KIF4A,NUF2,DCTN1,KIF15,FAM83D,CDT1,KIF11,KIFC1,KIF22,HDAC6,ECT2,KIF20A,LRPPRC,EMD
GO: Molecular Function	GO:0003682	chromatin binding		1.11e-06	0.001733	6.419e-05	0.0005091	64	629	CHAF1B,BRIP1,SMC1A,JDP2,ACTL6A,TRRAP,NPM3,CDC45,MTA3,TICRR,IFT74,APBB1,APEX1,MSH2,FANCM,UBE2T,PELP1,SMARCA2,FUS,CDCA5,SOX9,SOX15,ATRX,MCM8,SSBP1,SSRP1,BRCA1,RBMX,CBX1,NCAPD3,SATB2,YBX1,NCAPH,TFAM,PSIP1,EXO1,H2AZ1,ZNF431,CDK1,CDC6,TOP2A,PCNA,HELLS,CENPF,HMGN1,CKS2,NUCKS1,VRK1,POLR1A,POLD1,PAF1,ATF2,RBPJ,PCGF2,ENY2,DHX9,JARID2,CDT1,DNMT3B,RAD51,RAN,GMNN,TRIM28,KDM8
GO: Molecular Function	GO:0042393	histone binding		1.927e-06	0.003011	0.0001075	0.0008528	29	203	CHAF1B,HJURP,MCM2,NPM3,APBB1,PHF6,SMARCA2,ZMYND11,ATRX,NASP,SSRP1,PSME4,TONSL,MSL3,NCAPD3,WDR5,H2AX,ZMYND8,CKS1B,CKS2,PRMT7,VRK1,CTSV,NCAPG2,PTMA,HPF1,ANP32E,WRAP53,KDM8
GO: Molecular Function	GO:0008017	microtubule binding		7.695e-06	0.01202	0.0004145	0.003287	35	288	NUSAP1,KIF18A,MAP9,STRBP,KATNAL1,WDR54,NDC80,FAM161A,FES,CAMSAP1,BIRC5,SPAG5,GAPDH,PSRC1,KIF2C,OGG1,SKA1,AURKB,CETN3,PLK1,KIF23,NDE1,KIF4A,NUF2,DCTN1,KIF15,FAM83D,CDT1,KIF11,KIFC1,KIF22,HDAC6,ECT2,KIF20A,LRPPRC
GO: Molecular Function	GO:0047429	nucleoside-triphosphate diphosphatase activity		1.8e-05	0.02811	0.0009371	0.007433	6	12	NUDT1,DCTPP1,ITPA,DHX9,DUT,NUDT15
GO: Molecular Function	GO:0010997	anaphase-promoting complex binding		2.326e-05	0.03634	0.001172	0.009297	5	8	CLSPN,UBE2S,CDC20,PLK1,FBXO5
GO: Molecular Function	GO:0044877	protein-containing complex binding		2.531e-05	0.03953	0.001235	0.009799	109	1357	ERCC1,FBL,RPS2,SMC1A,ACTL6A,F2R,F2RL1,ANKRD54,TTC26,ADD3,FZD4,RACK1,MTA3,FLNA,IRS4,NAA15,FERMT1,TUBB,APBB1,PHF6,APEX1,MSH2,SHROOM2,GADD45GIP1,LSR,RUVBL1,MTOR,FRG1,WDR12,CLSPN,ATP1B1,SNRPA,SNRPB,SNRPD1,CDCA5,SORL1,MYBPC2,ATP5F1D,MYC,ATP5PO,MCM8,SPTBN1,NASP,NDUFA4,SSRP1,NDUFA9,STAB1,PSME4,C1QBP,UBE2S,BOP1,NME2,GRB10,LARP1,ARHGAP35,H2AZ1,CDC20,PCNA,EXOC4,PTTG1,CENPF,CETN3,CORO1C,HMGB1,HMGN1,TWF2,TTK…
GO: Molecular Function	GO:0140098	catalytic activity, acting on RNA		3.416e-05	0.05336	0.001617	0.01282	45	438	RIDA,BRIP1,FBL,MRM1,FEN1,EMG1,POLR1B,XRN2,RNASEH2A,APEX1,FANCM,PUS1,DTD1,WDR4,GARS1,NARS1,DIMT1,DDX18,POP1,CSTF2T,MARS2,TSEN2,EXO1,TOP2A,GATB,EXOSC8,RAD54B,TSEN34,METTL2A,POLR1A,POLR2L,PRIM1,PRIM2,EARS2,EIF4A3,DARS1,DHX33,NSUN2,DHX9,TRDMT1,FARSB,G3BP1,TFB1M,TRIM28,DDX39A
GO: Molecular Function	GO:0034061	DNA polymerase activity		3.956e-05	0.06179	0.001817	0.01441	21	145	NAF1,MRE11,CCT7,CCT5,MYC,TOP2A,AURKB,POLA2,HNRNPA1,HNRNPA2B1,DSCC1,POLD1,POLE2,XRCC5,ACD,TELO2,PINX1,WRAP53,RFC4,RFC5,TRIM28
GO: Molecular Function	GO:0070182	DNA polymerase binding		8.302e-05	0.1297	0.003705	0.02939	7	21	FANCD2,PCNA,HMGB1,HNRNPA2B1,ACD,CDT1,RAD51
GO: Molecular Function	GO:0043021	ribonucleoprotein complex binding		0.0001164	0.1819	0.005052	0.04007	21	156	RACK1,NAA15,PHF6,GADD45GIP1,MTOR,WDR12,SNRPA,SNRPB,SNRPD1,C1QBP,BOP1,LARP1,PTTG1,PRMT1,PRMT7,GEMIN5,EIF4A3,DHX33,DHX9,RPSA,LIN28A
GO: Molecular Function	GO:0015616	DNA translocase activity		0.0001206	0.1884	0.005091	0.04038	4	6	RAD54L,ATRX,RAD54B,ERCC6L
GO: Molecular Function	GO:0004536	deoxyribonuclease activity		0.0001623	0.2534	0.00667	0.0529	17	115	ERCC1,BRIP1,ZRANB3,FEN1,MRE11,XRN2,APEX1,BRCA1,EXO1,PCNA,HMGB1,HMGB2,POLD1,IL6,EME1,DFFA,DNA2
GO: Molecular Function	GO:1990518	single-stranded 3'-5' DNA helicase activity		0.0001714	0.2678	0.006866	0.05446	3	3	MCM6,MCM7,DHX9
GO: Molecular Function	GO:0016772	transferase activity, transferring phosphorus-containing groups		0.0002069	0.3232	0.008079	0.06408	136	1859	EPHB6,PI4K2B,SPRY1,ERCC2,NUP85,MDFI,F2R,ANKRD54,FZD4,RACK1,NAF1,NME5,FES,POLR1B,AKT2,FGFR2,MERTK,POMK,MPI,MRE11,ANGPT1,ADCK5,PIK3R3,PPM1E,MAGI3,CCT7,STIL,NUP35,SEPHS1,NDC1,CCT5,MTOR,TPX2,CARD11,CLSPN,MAP3K21,PLK4,SOD1,SORL1,MYC,STK36,GAPDH,AXL,DYRK4,SUCLG1,NUP205,AURKA,BMPR1A,DBF4,BUB1,BUB1B,NME2,PSRC1,GPI,CAD,GRK6,GPRC5A,CIT,CBS,CCNA2,CCNF,CCNG1,TAMM41,TK1,CCNB2,CDK1,CDC6,PARD3,CDC25A,TOP2A,AURK…
GO: Molecular Function	GO:0004693	cyclin-dependent protein serine/threonine kinase activity		0.0002221	0.3469	0.00846	0.0671	18	129	STIL,PSRC1,CCNA2,CCNF,CCNG1,CCNB2,CDK1,CDC6,CDC25A,CDK20,CDKN2C,CDKN3,CKS1B,CKS2,PKD1,FBXO7,PLK1,IPO5
GO: Molecular Function	GO:0008757	S-adenosylmethionine-dependent methyltransferase activity		0.0002576	0.4023	0.009579	0.07597	21	165	FBL,SETD6,MRM1,EMG1,EEF1AKMT2,WDR4,DIMT1,KMT5C,WDR5,INMT,CARNMT1,PRMT2,PRMT1,PRMT7,METTL2A,SMYD3,PNMT,NSUN2,TRDMT1,DNMT3B,TFB1M
GO: Molecular Function	GO:0097472	cyclin-dependent protein kinase activity		0.000326	0.5092	0.01184	0.09393	18	133	STIL,PSRC1,CCNA2,CCNF,CCNG1,CCNB2,CDK1,CDC6,CDC25A,CDK20,CDKN2C,CDKN3,CKS1B,CKS2,PKD1,FBXO7,PLK1,IPO5
GO: Molecular Function	GO:0008092	cytoskeletal protein binding		0.0003517	0.5494	0.01249	0.09903	84	1061	NUSAP1,KIF18A,MAP9,STRBP,ACTA1,KATNAL1,WDR54,ADD3,DLC1,MYL9,NDC80,FAM161A,FES,CAMSAP1,FLNA,IFT74,IFT81,FERMT1,APBB1,ARFGEF1,PHF6,BIRC5,SHROOM2,SPAG5,PDLIM4,MSN,CCT5,TRIM32,FRG1,MED28,MYO1F,CEP70,FUS,CACYBP,SNTB2,MYBPC2,CENPJ,GAPDH,MYO9A,AXL,SPTBN1,BRCA1,PSRC1,KIF2C,OGG1,B9D2,PDLIM1,TMSB4X,DAAM2,SKA1,CDH3,AURKB,TMEM67,CETN3,CORO1C,TWF2,PFN1,PLK1,IQGAP3,KIF23,PACSIN1,PIFO,YWHAH,ARHGEF10,NDE1,KIF4A,…
GO: Molecular Function	GO:0016628	oxidoreductase activity, acting on the CH-CH group of donors, NAD or NADP as acceptor		0.0003696	0.5773	0.01283	0.1018	7	26	PECR,SRD5A1,BDH2,DECR1,DHCR24,LBR,MECR
GO: Molecular Function	GO:0004519	endonuclease activity		0.0003872	0.6049	0.01315	0.1043	22	182	RIDA,ERCC1,ZRANB3,FEN1,MRE11,RNASEH2A,APEX1,POP1,CSTF2T,NTHL1,OGG1,TSEN2,EXO1,HMGB1,HMGB2,TSEN34,IL6,EME1,ANKLE1,DFFA,DNA2,G3BP1
GO: Molecular Function	GO:0061676	importin-alpha family protein binding		0.0005151	0.8046	0.01712	0.1358	4	8	TPX2,EI24,DHX9,RAN
GO: Molecular Function	GO:0030060	L-malate dehydrogenase activity		0.0006205	0.9693	0.01978	0.1569	3	4	MDH1,MDH2,MDH1B
GO: Molecular Function	GO:0008309	double-stranded DNA exodeoxyribonuclease activity		0.0006205	0.9693	0.01978	0.1569	3	4	FEN1,APEX1,EXO1
GO: Molecular Function	GO:0016779	nucleotidyltransferase activity		0.0006752	1	0.02109	0.1673	27	253	NAF1,POLR1B,MRE11,CCT7,CCT5,MYC,TAMM41,TOP2A,AURKB,POLA2,HNRNPA1,HNRNPA2B1,DSCC1,POLR1A,POLD1,POLE2,POLR2L,XRCC5,PRIM1,PRIM2,ACD,TELO2,PINX1,WRAP53,RFC4,RFC5,TRIM28
GO: Molecular Function	GO:0004520	endodeoxyribonuclease activity		0.0007018	1	0.02149	0.1705	12	75	ERCC1,ZRANB3,FEN1,MRE11,APEX1,EXO1,HMGB1,HMGB2,IL6,EME1,DFFA,DNA2
GO: Molecular Function	GO:0016835	carbon-oxygen lyase activity		0.0008309	1	0.02496	0.198	23	205	NUP85,L3HYPDH,MPI,APEX1,NUP35,NDC1,MYC,GAPDH,BCAT1,NUP205,GPI,NTHL1,OGG1,CBS,CYP2S1,PGAM1,PKM,XRCC5,CBSL,LDHA,EHHADH,ECHDC2,ENO1
GO: Molecular Function	GO:0004518	nuclease activity		0.0008969	1	0.02643	0.2096	31	311	RIDA,ERCC1,BRIP1,ZRANB3,FEN1,MRE11,XRN2,RNASEH2A,APEX1,FANCM,BRCA1,POP1,CSTF2T,NTHL1,OGG1,TSEN2,EXO1,TOP2A,PCNA,HMGB1,EXOSC8,HMGB2,TSEN34,POLD1,IL6,EME1,ANKLE1,DFFA,DNA2,G3BP1,TRIM28
GO: Molecular Function	GO:0016741	transferase activity, transferring one-carbon groups		0.001032	1	0.02945	0.2336	25	234	FBL,SETD6,MRM1,EMG1,SHMT1,EEF1AKMT2,ATIC,WDR4,DIMT1,CAD,KMT5C,WDR5,INMT,CARNMT1,PRMT2,PRMT1,PRMT7,METTL2A,SMYD3,PNMT,NSUN2,TRDMT1,DNMT3B,NSUN7,TFB1M
GO: Molecular Function	GO:0003720	telomerase activity		0.001037	1	0.02945	0.2336	13	89	NAF1,MRE11,CCT7,CCT5,MYC,AURKB,HNRNPA1,HNRNPA2B1,XRCC5,ACD,TELO2,PINX1,WRAP53
GO: Molecular Function	GO:0003964	RNA-directed DNA polymerase activity		0.001109	1	0.03094	0.2454	15	112	NAF1,MRE11,CCT7,CCT5,MYC,TOP2A,AURKB,HNRNPA1,HNRNPA2B1,XRCC5,ACD,TELO2,PINX1,WRAP53,TRIM28
GO: Molecular Function	GO:0140101	catalytic activity, acting on a tRNA		0.001259	1	0.03449	0.2735	16	125	PUS1,DTD1,WDR4,GARS1,NARS1,POP1,MARS2,TSEN2,GATB,TSEN34,METTL2A,EARS2,DARS1,NSUN2,TRDMT1,FARSB
GO: Molecular Function	GO:0003777	microtubule motor activity		0.001417	1	0.03816	0.3027	13	92	KIF18A,KIF2C,KIF23,NDE1,KIF4A,KIF15,KIF11,KIFC1,KIF22,WDR34,DYNC2H1,KIF20A,DYNC1LI1
GO: Molecular Function	GO:0019900	kinase binding		0.001483	1	0.03925	0.3113	72	926	LAPTM4B,RPS7,ANKRD54,ADD3,WWC2,RACK1,AKT2,FOXM1,FLNA,SRSF1,ANGPT1,PIK3R3,NBEA,MSH2,MSN,MTOR,WDCP,TPX2,CEP152,ATP1B1,SUFU,SOX9,CENPJ,NAP1L1,AURKA,DBF4,C1QBP,TPCN2,GPRC5A,CCNA2,CCNF,CCNG1,CCNB2,CEP250,CDC6,CDC25A,TOP2A,PCNA,AURKB,CDKN2C,HMGB1,TWF2,PGAM1,CKS1B,CKS2,PKD1,FBXO7,PRMT1,PLCG1,PLK1,VRK1,PIFO,ATF2,PPP1CC,PRKAR1A,PRKG1,DAB2IP,IL12RB2,IRS1,DCTN1,FBXO5,TELO2,FAM83D,KIF11,E2F1,LDHA,LDHB,KIF20A…
GO: Molecular Function	GO:0035173	histone kinase activity		0.001702	1	0.0443	0.3514	5	17	AURKA,CDK1,AURKB,CHEK1,VRK1
GO: Biological Process	GO:0140014	mitotic nuclear division		7.349e-44	5.499e-40	1.544e-40	1.467e-39	176	1083	NUSAP1,KIF18A,SPRY1,MAP9,ERCC2,CENPW,ATAD5,SMC1A,SPC25,MCM2,MCM3,MCM5,MCM6,MCM7,JADE1,MCM10,RTKN,TRRAP,CDC45,USP44,TUBA1B,TUBB4B,MTA3,NDC80,FGFR2,TACC3,TADA3,FOXM1,CUL4A,MRE11,FLNA,TICRR,GTSE1,DTL,TUBB,APEX1,BIRC5,MSH2,STIL,SMC2,GADD45GIP1,SPAG5,HAUS1,TPX2,CEP70,CEP152,CLSPN,CDCA5,PLK4,MYC,SOX4,CENPJ,ATRX,MCM8,SPTBN1,NASP,BCAT1,CENPK,AURKA,NCAPG,PSME4,SUGT1,BRCA1,DBF4,BUB1,BUB1B,UBE2S,PSRC1,KIF2C…
GO: Biological Process	GO:1903047	mitotic cell cycle process		7.349e-44	5.499e-40	1.544e-40	1.467e-39	176	1083	NUSAP1,KIF18A,SPRY1,MAP9,ERCC2,CENPW,ATAD5,SMC1A,SPC25,MCM2,MCM3,MCM5,MCM6,MCM7,JADE1,MCM10,RTKN,TRRAP,CDC45,USP44,TUBA1B,TUBB4B,MTA3,NDC80,FGFR2,TACC3,TADA3,FOXM1,CUL4A,MRE11,FLNA,TICRR,GTSE1,DTL,TUBB,APEX1,BIRC5,MSH2,STIL,SMC2,GADD45GIP1,SPAG5,HAUS1,TPX2,CEP70,CEP152,CLSPN,CDCA5,PLK4,MYC,SOX4,CENPJ,ATRX,MCM8,SPTBN1,NASP,BCAT1,CENPK,AURKA,NCAPG,PSME4,SUGT1,BRCA1,DBF4,BUB1,BUB1B,UBE2S,PSRC1,KIF2C…
GO: Biological Process	GO:0000278	mitotic cell cycle		7.349e-44	5.499e-40	1.544e-40	1.467e-39	176	1083	NUSAP1,KIF18A,SPRY1,MAP9,ERCC2,CENPW,ATAD5,SMC1A,SPC25,MCM2,MCM3,MCM5,MCM6,MCM7,JADE1,MCM10,RTKN,TRRAP,CDC45,USP44,TUBA1B,TUBB4B,MTA3,NDC80,FGFR2,TACC3,TADA3,FOXM1,CUL4A,MRE11,FLNA,TICRR,GTSE1,DTL,TUBB,APEX1,BIRC5,MSH2,STIL,SMC2,GADD45GIP1,SPAG5,HAUS1,TPX2,CEP70,CEP152,CLSPN,CDCA5,PLK4,MYC,SOX4,CENPJ,ATRX,MCM8,SPTBN1,NASP,BCAT1,CENPK,AURKA,NCAPG,PSME4,SUGT1,BRCA1,DBF4,BUB1,BUB1B,UBE2S,PSRC1,KIF2C…
GO: Biological Process	GO:0022402	cell cycle process		8.254e-44	6.176e-40	1.544e-40	1.467e-39	224	1632	NUSAP1,RIDA,KIF18A,SPRY1,MAP9,ERCC1,ERCC2,BRIP1,CENPW,ATAD5,SMC1A,SPC25,MCM2,MCM3,MCM5,MCM6,MCM7,RRAGB,JADE1,MCM10,RTKN,TRRAP,CDC45,FANCD2,USP44,TUBA1B,RMI1,TUBB4B,MTA3,NDC80,FEN1,RBM14,FES,AKT2,FGFR2,TACC3,TADA3,RAD54L,FOXM1,CUL4A,MRE11,FLNA,TICRR,MYBBP1A,GTSE1,DTL,TUBB,APBB1,APEX1,BIRC5,MSH2,STIL,SMC2,FANCM,GADD45GIP1,SPAG5,ARL2,NDC1,HAUS1,MTOR,TPX2,CEP70,CEP152,CLSPN,GOLGA8A,CDCA5,PLK4,MYC,SOX…
GO: Biological Process	GO:0007049	cell cycle		1.331e-43	9.961e-40	1.992e-40	1.892e-39	251	1971	NUSAP1,RIDA,KIF18A,SPRY1,MAP9,CHAF1B,ERCC1,ERCC2,BRIP1,MIS18BP1,CENPW,ERH,ATAD5,USP9X,SMC1A,HJURP,SPC25,MCM2,MCM3,MCM5,MCM6,MCM7,RRAGB,JADE1,MCM10,RTKN,TRRAP,CDC45,FANCD2,USP44,TUBA1B,RMI1,TUBB4B,RACK1,MTA3,NDC80,FEN1,RBM14,FES,AKT2,FGFR2,TACC3,TADA3,RAD54L,FOXM1,CUL4A,MRE11,FLNA,TICRR,MYBBP1A,GTSE1,DTL,TUBB,APBB1,APEX1,BIRC5,MSH2,STIL,SMC2,FANCM,GADD45GIP1,SPAG5,ARL2,NDC1,RUVBL1,HAUS1,TRIM32,MTO…
GO: Biological Process	GO:0000280	nuclear division		7.816e-43	5.849e-39	9.748e-40	9.258e-39	190	1256	NUSAP1,KIF18A,SPRY1,MAP9,ERCC1,ERCC2,BRIP1,CENPW,ATAD5,SMC1A,SPC25,MCM2,MCM3,MCM5,MCM6,MCM7,JADE1,MCM10,RTKN,TRRAP,CDC45,FANCD2,USP44,TUBA1B,RMI1,TUBB4B,MTA3,NDC80,FGFR2,TACC3,TADA3,RAD54L,FOXM1,CUL4A,MRE11,FLNA,TICRR,GTSE1,DTL,TUBB,APEX1,BIRC5,MSH2,STIL,SMC2,FANCM,GADD45GIP1,SPAG5,NDC1,HAUS1,TPX2,CEP70,CEP152,CLSPN,CDCA5,PLK4,MYC,SOX4,CENPJ,ATRX,MCM8,SPTBN1,NASP,BCAT1,CENPK,AURKA,NCAPG,PSME4,SUG…
GO: Biological Process	GO:0048285	organelle fission		1.034e-41	7.739e-38	1.106e-38	1.05e-37	192	1301	NUSAP1,KIF18A,SPRY1,MAP9,ERCC1,ERCC2,BRIP1,CENPW,ATAD5,SMC1A,SPC25,MCM2,MCM3,MCM5,MCM6,MCM7,JADE1,MCM10,RTKN,TRRAP,CDC45,FANCD2,USP44,TUBA1B,RMI1,TUBB4B,MTA3,NDC80,FGFR2,TACC3,TADA3,RAD54L,FOXM1,CUL4A,MRE11,FLNA,TICRR,GTSE1,DTL,TUBB,APEX1,BIRC5,MSH2,STIL,SMC2,FANCM,GADD45GIP1,SPAG5,NDC1,HAUS1,TPX2,CEP70,CEP152,MTFR2,CLSPN,CDCA5,PLK4,MYC,SOX4,CENPJ,ATRX,MCM8,SPTBN1,NASP,BCAT1,CENPK,AURKA,NCAPG,PSM…
GO: Biological Process	GO:0051276	chromosome organization		7.151e-37	5.351e-33	6.689e-34	6.353e-33	182	1287	NUSAP1,KIF18A,CHAF1B,ERCC1,ERCC2,BRIP1,MIS18BP1,CENPW,H2AZ2,FBL,SETD6,SMC1A,HJURP,JDP2,MCM2,MCM3,MCM5,MCM6,MCM7,ACTL6A,JADE1,TRRAP,ZRANB3,NPM3,CDC45,FANCD2,CENPP,USP44,SCML2,MTA3,NDC80,NAF1,FEN1,RBM14,TACC3,TADA3,RAD54L,CUL4A,MRE11,APBB1,APEX1,GINS4,BIRC5,CCT7,PPHLN1,MSH2,SMC2,SPAG5,NDC1,RUVBL1,CCT5,SCMH1,TET1,CENPI,SMARCA2,GINS2,CDCA5,MYC,SOX9,SOX15,ZMYND11,CENPN,ATRX,MCM8,NAP1L1,NASP,CENPK,SAP3…
GO: Biological Process	GO:0006260	DNA replication		1.065e-29	7.967e-26	8.852e-27	8.408e-26	72	289	CHAF1B,BRIP1,ATAD5,SMC1A,WDR18,MCM2,MCM3,MCM5,MCM6,MCM7,MCM10,ZRANB3,CDC45,RMI1,FEN1,RBM14,MRE11,TICRR,RNASEH2A,DTL,GINS4,FANCM,GINS2,CACYBP,CLSPN,DTD1,ATRX,MCM8,NAP1L1,NASP,SSBP1,SSRP1,CDAN1,BRCA1,DBF4,TONSL,CCNA2,ORC2,EXO1,CDK1,CDC6,PCNA,ORC6,CHEK1,POLA2,RECQL4,NUCKS1,BOD1L1,DSCC1,POLD1,POLE2,RMI2,PRIM1,PRIM2,IL6,EME1,GINS1,DHX9,FBXO5,SLBP,CDT1,DNA2,RAD51,MMS22L,DUT,RFC4,RFC5,GMNN,ESCO2,LIG1,AL…
GO: Biological Process	GO:0044772	mitotic cell cycle phase transition		3.081e-29	2.305e-25	2.305e-26	2.19e-25	108	622	ERCC2,ATAD5,MCM2,MCM3,MCM5,MCM6,MCM7,JADE1,MCM10,CDC45,USP44,TUBB4B,MTA3,NDC80,TACC3,FOXM1,CUL4A,MRE11,TICRR,GTSE1,DTL,TUBB,APEX1,BIRC5,HAUS1,TPX2,CEP70,CEP152,CLSPN,CDCA5,PLK4,MYC,SOX4,CENPJ,MCM8,NASP,BCAT1,AURKA,PSME4,BRCA1,DBF4,BUB1,BUB1B,UBE2S,TCF19,UBE2C,ODF2,CIT,GSPT1,CCNA2,CCNF,CCNG1,ORC2,CCNB2,CEP250,CDK1,CDC6,CDC20,CDC25A,PCNA,DCTN3,AURKB,CDKN2C,CDKN3,CENPF,ORC6,CHEK1,FOXN3,HMMR,POLA2,TR…
GO: Biological Process	GO:0044770	cell cycle phase transition		2.51e-28	1.878e-24	1.639e-25	1.556e-24	111	668	ERCC2,ATAD5,MCM2,MCM3,MCM5,MCM6,MCM7,JADE1,MCM10,CDC45,USP44,TUBB4B,MTA3,NDC80,TACC3,FOXM1,CUL4A,MRE11,TICRR,GTSE1,DTL,TUBB,APEX1,BIRC5,HAUS1,TPX2,CEP70,CEP152,CLSPN,CDCA5,PLK4,MYC,SOX4,CENPJ,MCM8,NASP,BCAT1,AURKA,PSME4,BRCA1,DBF4,BUB1,BUB1B,UBE2S,TCF19,UBE2C,ODF2,CIT,GSPT1,CCNA2,CCNF,CCNG1,ORC2,CCNB2,CEP250,CDK1,CDC6,CDC20,CDC25A,PCNA,DCTN3,AURKB,CDKN2C,CDKN3,CENPF,ORC6,CHEK1,FOXN3,HMMR,POLA2,TR…
GO: Biological Process	GO:0006259	DNA metabolic process		2.628e-28	1.966e-24	1.639e-25	1.556e-24	148	1080	CHAF1B,ERCC1,ERCC2,BRIP1,ATAD5,USP9X,SMC1A,WDR18,MCM2,MCM3,MCM5,MCM6,MCM7,ACTL6A,MCM10,TRRAP,ZRANB3,CDC45,FANCD2,FANCB,RMI1,FANCG,NAF1,FEN1,RBM14,RAD54L,FOXM1,CUL4A,MRE11,TICRR,XRN2,RNASEH2A,DTL,APBB1,APEX1,GINS4,CCT7,PPHLN1,MSH2,SMC2,FANCM,RAD51AP1,RUVBL1,UBE2T,CCT5,NUDT1,TET1,GINS2,FUS,CACYBP,CLSPN,CDCA5,MYC,DTD1,ATRX,MCM8,NAP1L1,NASP,SSBP1,SSRP1,CDAN1,PSME4,BRCA1,DBF4,TONSL,NSMCE1,TCF7,NTHL1,M…
GO: Biological Process	GO:0007059	chromosome segregation		8.514e-28	6.371e-24	4.901e-25	4.655e-24	76	342	NUSAP1,KIF18A,ERCC2,BRIP1,CENPW,USP9X,SMC1A,HJURP,SPC25,FANCD2,USP44,RMI1,NDC80,FEN1,TACC3,MRE11,BIRC5,SMC2,FANCM,SPAG5,NDC1,CDCA5,CENPN,ATRX,CENPK,NCAPG,BRCA1,BUB1,BUB1B,PSRC1,KIF2C,NCAPD3,MIS18A,NCAPH,CIT,ZWINT,CDC6,CDC20,SKA1,TOP2A,AURKB,PTTG1,CENPF,OIP5,TRIP13,TTK,RECQL4,DSCC1,PLK1,ANAPC4,KIF23,RMI2,CENPH,ESPL1,EME1,INCENP,NDE1,DLGAP5,KIF4A,NUF2,CDCA2,FBXO5,PINX1,FAM83D,SGO2,CDT1,KIFC1,KIF22,…
GO: Biological Process	GO:0071897	DNA biosynthetic process		1.279e-27	9.569e-24	6.835e-25	6.492e-24	89	461	CHAF1B,BRIP1,ATAD5,SMC1A,WDR18,MCM2,MCM3,MCM5,MCM6,MCM7,MCM10,ZRANB3,CDC45,RMI1,NAF1,FEN1,RBM14,MRE11,TICRR,RNASEH2A,DTL,GINS4,CCT7,FANCM,CCT5,GINS2,CACYBP,CLSPN,MYC,DTD1,ATRX,MCM8,NAP1L1,NASP,SSBP1,SSRP1,CDAN1,BRCA1,DBF4,TONSL,CCNA2,ORC2,TK1,EXO1,CDK1,CDC6,TOP2A,PCNA,AURKB,CENPF,ORC6,CHEK1,POLA2,HNRNPA1,HNRNPA2B1,RECQL4,NUCKS1,BOD1L1,DSCC1,POLD1,POLE2,RMI2,XRCC5,PPIA,PRIM1,PRIM2,IL6,EME1,ACD,GIN…
GO: Biological Process	GO:0006261	DNA-dependent DNA replication		3.497e-25	2.617e-21	1.744e-22	1.657e-21	49	158	ATAD5,SMC1A,WDR18,MCM2,MCM3,MCM5,MCM6,MCM7,MCM10,ZRANB3,CDC45,FEN1,MRE11,TICRR,GINS4,FANCM,GINS2,ATRX,MCM8,SSBP1,DBF4,TONSL,ORC2,CDC6,PCNA,ORC6,POLA2,RECQL4,NUCKS1,BOD1L1,DSCC1,POLD1,POLE2,PRIM1,PRIM2,EME1,GINS1,FBXO5,SLBP,CDT1,DNA2,RAD51,MMS22L,RFC4,RFC5,GMNN,LIG1,ALYREF,RPA3
GO: Biological Process	GO:0051301	cell division		1.113e-24	8.328e-21	5.205e-22	4.944e-21	110	725	NUSAP1,MAP9,ERCC2,BRIP1,MIS18BP1,CENPW,USP9X,SMC1A,SPC25,RTKN,USP44,TUBA1B,RACK1,NDC80,FGFR2,TACC3,FERMT1,TUBB,BIRC5,SMC2,SPAG5,RUVBL1,HAUS1,TPX2,CDCA5,MYC,CENPJ,SPTBN1,AURKA,NCAPG,TXNL4A,CDC123,BUB1,BUB1B,UBE2S,PSRC1,KIF2C,NCAPD3,YBX1,MIS18A,TUBA1C,UBE2C,NCAPH,CIT,CCNA2,ZWINT,CCNF,CCNG1,CCNB2,CDK1,CDC6,CDC20,PARD3,CDC25A,SKA1,TOP2A,DCTN3,AURKB,HELLS,CDK20,PTTG1,CENPF,ORC6,CETN3,OIP5,HMGB2,CKS1B,…
GO: Biological Process	GO:0000819	sister chromatid segregation		2.092e-23	1.565e-19	9.207e-21	8.745e-20	53	201	NUSAP1,KIF18A,SMC1A,USP44,NDC80,FEN1,TACC3,MRE11,BIRC5,SMC2,SPAG5,CDCA5,ATRX,CENPK,NCAPG,BUB1,BUB1B,PSRC1,KIF2C,NCAPD3,NCAPH,CIT,ZWINT,CDC6,CDC20,TOP2A,AURKB,PTTG1,CENPF,TRIP13,TTK,RECQL4,DSCC1,PLK1,ANAPC4,KIF23,RMI2,ESPL1,INCENP,DLGAP5,KIF4A,NUF2,FBXO5,PINX1,SGO2,CDT1,KIFC1,KIF22,RAN,CDCA8,ESCO2,DYNC1LI1,MAD2L1
GO: Biological Process	GO:0006974	cellular response to DNA damage stimulus		4.25e-23	3.18e-19	1.767e-20	1.678e-19	121	884	CHAF1B,ERCC1,ERCC2,BRIP1,ATAD5,SHISA5,SMC1A,MCM2,MCM3,MCM5,MCM6,MCM7,ACTL6A,MCM10,TRRAP,ZRANB3,CDC45,FANCD2,FANCB,RMI1,FANCG,FEN1,RBM14,RAD54L,FOXM1,CUL4A,MRE11,TICRR,XRN2,RNASEH2A,GTSE1,DTL,APBB1,APEX1,GINS4,CHCHD6,MSH2,SMC2,FANCM,RAD51AP1,RUVBL1,UBE2T,NUDT1,TRIM32,GINS2,FUS,CLSPN,CDCA5,MYC,SOX4,ATRX,MCM8,SSRP1,AURKA,PSME4,BRCA1,TONSL,CBX1,NSMCE1,NTHL1,OGG1,CCNG1,DDIAS,EXO1,H2AX,CDK1,SPIDR,TOP2A…
GO: Biological Process	GO:0006281	DNA repair		5.478e-23	4.099e-19	2.157e-20	2.049e-19	92	564	CHAF1B,ERCC1,ERCC2,BRIP1,SMC1A,MCM2,MCM3,MCM5,MCM6,MCM7,ACTL6A,TRRAP,ZRANB3,CDC45,FANCD2,FANCB,RMI1,FANCG,FEN1,RBM14,RAD54L,FOXM1,CUL4A,MRE11,TICRR,XRN2,RNASEH2A,DTL,APBB1,APEX1,GINS4,MSH2,SMC2,FANCM,RAD51AP1,RUVBL1,UBE2T,NUDT1,GINS2,FUS,CLSPN,CDCA5,ATRX,MCM8,SSRP1,PSME4,BRCA1,TONSL,NSMCE1,NTHL1,OGG1,EXO1,H2AX,CDK1,SPIDR,PCNA,PTTG1,HMGB1,HMGB2,HMGN1,CHEK1,TRIP13,AUNIP,RECQL4,RAD54B,NUCKS1,BOD1L1,…
GO: Biological Process	GO:0007346	regulation of mitotic cell cycle		1.487e-22	1.113e-18	5.564e-20	5.284e-19	105	713	NUSAP1,MAP9,ERCC2,ATAD5,SMC1A,JADE1,TRRAP,CDC45,USP44,TUBB4B,MTA3,NDC80,FGFR2,TACC3,CUL4A,MRE11,TICRR,GTSE1,DTL,TUBB,APEX1,BIRC5,MSH2,STIL,GADD45GIP1,HAUS1,TPX2,CEP70,CEP152,CLSPN,CDCA5,PLK4,MYC,SOX4,CENPJ,ATRX,AURKA,PSME4,BRCA1,DBF4,BUB1,BUB1B,PSRC1,UBE2C,ODF2,CIT,ZWINT,CCNG1,DDIAS,CEP250,CDK1,CDC6,CDC20,CDC25A,TOP2A,PCNA,DCTN3,AURKB,CDKN2C,PTTG1,CENPF,HMGB1,CHEK1,FOXN3,HMMR,TRIP13,TTK,CKS1B,CKS…
GO: Biological Process	GO:0000070	mitotic sister chromatid segregation		3.512e-22	2.628e-18	1.251e-19	1.189e-18	46	160	NUSAP1,KIF18A,SMC1A,USP44,NDC80,TACC3,BIRC5,SMC2,SPAG5,CDCA5,ATRX,CENPK,NCAPG,BUB1,BUB1B,PSRC1,KIF2C,NCAPD3,NCAPH,CIT,ZWINT,CDC6,CDC20,AURKB,PTTG1,CENPF,TRIP13,TTK,DSCC1,PLK1,ANAPC4,KIF23,ESPL1,INCENP,DLGAP5,KIF4A,NUF2,FBXO5,PINX1,CDT1,KIFC1,KIF22,RAN,CDCA8,DYNC1LI1,MAD2L1
GO: Biological Process	GO:0098813	nuclear chromosome segregation		4.819e-22	3.606e-18	1.639e-19	1.557e-18	61	280	NUSAP1,KIF18A,BRIP1,SMC1A,FANCD2,USP44,RMI1,NDC80,FEN1,TACC3,MRE11,BIRC5,SMC2,FANCM,SPAG5,NDC1,CDCA5,ATRX,CENPK,NCAPG,BUB1,BUB1B,PSRC1,KIF2C,NCAPD3,NCAPH,CIT,ZWINT,CDC6,CDC20,TOP2A,AURKB,PTTG1,CENPF,TRIP13,TTK,RECQL4,DSCC1,PLK1,ANAPC4,KIF23,RMI2,ESPL1,EME1,INCENP,DLGAP5,KIF4A,NUF2,FBXO5,PINX1,FAM83D,SGO2,CDT1,KIFC1,KIF22,RAN,ECT2,CDCA8,ESCO2,DYNC1LI1,MAD2L1
GO: Biological Process	GO:0010564	regulation of cell cycle process		1.592e-21	1.191e-17	5.178e-19	4.918e-18	114	839	NUSAP1,MAP9,ERCC2,ATAD5,SMC1A,JADE1,CDC45,USP44,TUBB4B,MTA3,NDC80,FEN1,RBM14,AKT2,FGFR2,TACC3,FOXM1,CUL4A,MRE11,TICRR,MYBBP1A,GTSE1,DTL,TUBB,APEX1,BIRC5,STIL,SPAG5,HAUS1,TPX2,CEP70,CEP152,CLSPN,CDCA5,PLK4,SOX4,SOX9,SOX15,CENPJ,ATRX,AURKA,PSME4,BRCA1,DBF4,BUB1,BUB1B,PSRC1,UBE2C,ODF2,CIT,CCNF,CCNG1,CEP250,CDK1,CDC6,CDC20,CDC25A,PCNA,DCTN3,AURKB,CDKN2C,TMEM67,PTTG1,CENPF,CBX3,CHEK1,FOXN3,HMMR,TRIP13…
GO: Biological Process	GO:0000226	microtubule cytoskeleton organization		3.127e-21	2.34e-17	9.75e-19	9.26e-18	114	846	TBC1D19,NUSAP1,KIF18A,SPRY1,MAP9,CENPW,SMC1A,SPC25,KATNAL1,IFT43,TTC26,TBC1D24,TUBA1B,TUBB4B,NDC80,ZMYND10,FAM161A,FAM92A,NME5,RBM14,FES,CC2D2A,IFT80,TACC3,CAMSAP1,RSPH9,FLNA,IFT74,IFT81,TUBB,BIRC5,STIL,SPAG5,WDR19,LRRC46,ARL2,HAUS1,GALNT11,TPX2,CEP70,CEP152,GOLGA8A,PLK4,STK36,CLUAP1,CENPJ,ATRX,GAPDH,TOGARAM1,AURKA,BRCA1,HYLS1,PSRC1,KIF2C,RPGRIP1L,TUBA1C,ARHGAP35,ODF2,CCNF,B9D2,RABL2B,CEP250,CDK1…
GO: Biological Process	GO:0051726	regulation of cell cycle		3.659e-21	2.738e-17	1.073e-18	1.019e-17	150	1295	NUSAP1,MAP9,ERCC2,BRIP1,ATAD5,SMC1A,RRAGB,JADE1,TRRAP,CDC45,USP44,TUBB4B,RACK1,MTA3,NDC80,FEN1,RBM14,AKT2,FGFR2,TACC3,FOXM1,CUL4A,MRE11,TICRR,MYBBP1A,GTSE1,DTL,TUBB,APBB1,APEX1,BIRC5,MSH2,STIL,GADD45GIP1,SPAG5,HAUS1,TRIM32,MTOR,TPX2,CEP70,CEP152,CLSPN,CDCA5,PLK4,MYC,SOX4,SOX9,SOX15,CENPJ,ATRX,AURKA,PSME4,BRCA1,CDC123,DBF4,BUB1,BUB1B,BOP1,PSRC1,UBE2C,ODF2,CIT,CCNA2,ZWINT,CCNF,CCNG1,DDIAS,CCNB2,CEP…
GO: Biological Process	GO:0033365	protein localization to organelle		3.728e-21	2.79e-17	1.073e-18	1.019e-17	158	1400	TBC1D19,RPL34,MIS18BP1,CENPW,RPL36A,NUP85,RPS2,USP9X,RPS7,HJURP,RPS10,RTKN,IFT43,TTC26,TBC1D24,CENPP,TUBB4B,NDC80,ZMYND10,FAM161A,FAM92A,RPF2,MIPEP,NME5,CC2D2A,LRRC7,IFT80,TIMM44,RSPH9,FLNA,ANGPT1,IFT74,IFT81,GTSE1,FERMT1,TUBB,CCT7,PPHLN1,MSH2,STIL,SPAG5,NUP35,MSN,WDR19,LRRC46,ARL2,RUVBL1,TIMM21,HAUS1,CCT5,GALNT11,CENPI,CEP70,CEP152,SUFU,CDCA5,PLK4,SORL1,SOX9,STK36,PECR,CLUAP1,CENPJ,CENPN,ATRX,MC…
GO: Biological Process	GO:0071103	DNA conformation change		6.906e-20	5.168e-16	1.914e-17	1.818e-16	64	335	NUSAP1,CHAF1B,ERCC2,BRIP1,MIS18BP1,CENPW,HJURP,MCM2,MCM3,MCM5,MCM6,MCM7,ZRANB3,CDC45,CENPP,RAD54L,CUL4A,MRE11,GINS4,SMC2,RUVBL1,CENPI,SMARCA2,GINS2,CDCA5,SOX9,CENPN,ATRX,MCM8,NAP1L1,NASP,CENPK,CDAN1,NCAPG,PSME4,NCAPD3,MIS18A,NCAPH,H2AX,CDK1,TOP2A,HELLS,HMGB1,OIP5,HMGB2,HNRNPA2B1,CENPM,RECQL4,RAD54B,DSCC1,SMYD3,PAF1,XRCC5,CENPH,ERCC6L,NCAPG2,GINS1,DHX9,DNA2,RAD51,CENPU,RFC4,RFC5,G3BP1
GO: Biological Process	GO:0044786	cell cycle DNA replication		8.057e-19	6.029e-15	2.153e-16	2.045e-15	29	73	ATAD5,SMC1A,MCM2,MCM3,MCM5,MCM6,MCM7,CDC45,FEN1,MRE11,ATRX,DBF4,PCNA,POLA2,POLD1,POLE2,PRIM1,PRIM2,GINS1,FBXO5,SLBP,CDT1,DNA2,RAD51,RFC4,RFC5,GMNN,LIG1,RPA3
GO: Biological Process	GO:0007017	microtubule-based process		2.311e-18	1.73e-14	5.964e-16	5.664e-15	126	1071	TBC1D19,NUSAP1,KIF18A,SPRY1,MAP9,CENPW,SMC1A,SPC25,KATNAL1,IFT43,TTC26,TBC1D24,TUBA1B,TUBB4B,NDC80,ZMYND10,FAM161A,FAM92A,NME5,RBM14,FES,CC2D2A,IFT80,TACC3,CAMSAP1,RSPH9,FLNA,XRN2,IFT74,IFT81,GTSE1,TUBB,BIRC5,STIL,SPAG5,WDR19,LRRC46,ARL2,HAUS1,GALNT11,TPX2,CEP70,CEP152,GOLGA8A,PLK4,SOD1,STK36,CLUAP1,CENPJ,ATRX,GAPDH,TOGARAM1,BLOC1S1,AURKA,BRCA1,HYLS1,PSRC1,KIF2C,RPGRIP1L,TUBA1C,ARHGAP35,ODF2,CCNF…
GO: Biological Process	GO:1901990	regulation of mitotic cell cycle phase transition		8.69e-18	6.502e-14	2.167e-15	2.059e-14	74	470	ERCC2,ATAD5,JADE1,CDC45,USP44,TUBB4B,MTA3,NDC80,CUL4A,MRE11,TICRR,GTSE1,DTL,TUBB,APEX1,BIRC5,HAUS1,TPX2,CEP70,CEP152,CLSPN,CDCA5,PLK4,SOX4,CENPJ,AURKA,PSME4,BRCA1,DBF4,BUB1,BUB1B,UBE2C,ODF2,CCNG1,CEP250,CDK1,CDC6,CDC20,CDC25A,PCNA,DCTN3,AURKB,CDKN2C,CENPF,CHEK1,FOXN3,HMMR,TRIP13,TTK,PKD1,FBXO7,PRMT2,PRMT1,PLK1,ANAPC4,PRKDC,ESPL1,KNTC1,CCP110,HAUS6,NDE1,PSMA2,DLGAP5,PSMD3,SFI1,DCTN1,FBXO5,PINX1,CD…
GO: Biological Process	GO:0033260	nuclear DNA replication		1.023e-17	7.657e-14	2.47e-15	2.346e-14	26	62	ATAD5,MCM2,MCM3,MCM5,MCM6,MCM7,CDC45,FEN1,ATRX,DBF4,PCNA,POLA2,POLD1,POLE2,PRIM1,PRIM2,GINS1,SLBP,CDT1,DNA2,RAD51,RFC4,RFC5,GMNN,LIG1,RPA3
GO: Biological Process	GO:0006310	DNA recombination		1.88e-17	1.407e-13	4.397e-15	4.176e-14	57	304	ERCC1,ERCC2,BRIP1,ATAD5,MCM2,MCM3,MCM5,MCM6,MCM7,ACTL6A,ZRANB3,CDC45,FANCB,RMI1,FEN1,RBM14,RAD54L,MRE11,XRN2,APEX1,GINS4,MSH2,FANCM,RAD51AP1,RUVBL1,GINS2,FUS,MCM8,BRCA1,TONSL,NSMCE1,TCF7,EXO1,H2AX,SPIDR,TOP2A,HMGB1,HMGB2,CHEK1,TRIP13,AUNIP,RECQL4,RAD54B,NUCKS1,RMI2,XRCC5,PRKDC,EME1,ANKLE1,KPNA2,RAD51,MMS22L,SMC6,WRAP53,LIG1,ALYREF,RPA3
GO: Biological Process	GO:1901987	regulation of cell cycle phase transition		5.884e-17	4.403e-13	1.334e-14	1.267e-13	76	508	ERCC2,ATAD5,JADE1,CDC45,USP44,TUBB4B,MTA3,NDC80,CUL4A,MRE11,TICRR,GTSE1,DTL,TUBB,APEX1,BIRC5,HAUS1,TPX2,CEP70,CEP152,CLSPN,CDCA5,PLK4,SOX4,CENPJ,AURKA,PSME4,BRCA1,DBF4,BUB1,BUB1B,UBE2C,ODF2,CCNG1,CEP250,CDK1,CDC6,CDC20,CDC25A,PCNA,DCTN3,AURKB,CDKN2C,CENPF,CHEK1,FOXN3,HMMR,TRIP13,TTK,PKD1,FBXO7,PRMT2,PRMT1,PLK1,ANAPC4,PAF1,PRKDC,ESPL1,KNTC1,CCP110,HAUS6,NDE1,PSMA2,DLGAP5,PSMD3,SFI1,DCTN1,FBXO5,PIN…
GO: Biological Process	GO:0007010	cytoskeleton organization		1.521e-16	1.138e-12	3.348e-14	3.18e-13	165	1663	TBC1D19,NUSAP1,KIF18A,SPRY1,MAP9,CENPW,ABR,SMC1A,ACTA1,SPC25,KATNAL1,RTKN,F2RL1,IFT43,TTC26,ADD3,TBC1D24,EHD2,TUBA1B,TUBB4B,DLC1,NDC80,ZMYND10,FAM161A,FAM92A,NME5,RBM14,FES,FGD1,CC2D2A,SEMA6A,IFT80,TACC3,CAMSAP1,RSPH9,FLNA,IFT74,IFT81,PPM1E,TUBB,ARFGEF1,BIRC5,NLGN1,STIL,SHROOM2,SPAG5,PDLIM4,MSN,WDR19,ARHGAP4,LRRC46,ARL2,ATP2C1,HAUS1,TRIM32,MTOR,GALNT11,MYO1F,TPX2,CEP70,CEP152,GOLGA8A,PLK4,SOD1,MY…
GO: Biological Process	GO:0034502	protein localization to chromosome		2.516e-16	1.883e-12	5.379e-14	5.109e-13	35	129	MIS18BP1,CENPW,HJURP,CENPP,NDC80,CCT7,PPHLN1,MSH2,RUVBL1,CCT5,CENPI,CDCA5,CENPN,ATRX,MCM8,NASP,CENPK,BUB1B,MIS18A,CDK1,SPIDR,AURKB,OIP5,TTK,CENPM,PLK1,XRCC5,CENPH,ACD,PINX1,CDT1,GNL3,CENPU,WRAP53,ESCO2
GO: Biological Process	GO:0032392	DNA geometric change		8.874e-16	6.64e-12	1.845e-13	1.752e-12	33	119	ERCC2,BRIP1,MCM2,MCM3,MCM5,MCM6,MCM7,ZRANB3,CDC45,RAD54L,CUL4A,MRE11,GINS4,RUVBL1,GINS2,ATRX,MCM8,TOP2A,HMGB1,HMGB2,HNRNPA2B1,RECQL4,RAD54B,DSCC1,XRCC5,ERCC6L,GINS1,DHX9,DNA2,RAD51,RFC4,RFC5,G3BP1
GO: Biological Process	GO:0051983	regulation of chromosome segregation		1.249e-15	9.345e-12	2.526e-13	2.399e-12	32	113	USP44,NDC80,FEN1,TACC3,BIRC5,SPAG5,CDCA5,ATRX,BUB1,BUB1B,KIF2C,CIT,CDC6,CDC20,AURKB,PTTG1,CENPF,TRIP13,TTK,RECQL4,PLK1,ANAPC4,RMI2,ESPL1,DLGAP5,FBXO5,SGO2,CDT1,SMC6,ECT2,DYNC1LI1,MAD2L1
GO: Biological Process	GO:0051656	establishment of organelle localization		2.177e-15	1.629e-11	4.287e-13	4.071e-12	98	805	TBC1D19,NUSAP1,KIF18A,SPRY1,IFT43,TTC26,TBC1D24,S100A13,TUBB4B,NDC80,ZMYND10,FAM161A,FAM92A,NME5,FES,CC2D2A,FGFR2,IFT80,TACC3,RSPH9,FLNA,IFT74,IFT81,TUBB,BIRC5,NLGN1,STIL,SHROOM2,SPAG5,WDR19,LRRC46,HAUS1,GALNT11,CEP70,CEP152,CDCA5,PLK4,STK36,CLUAP1,CENPJ,TOGARAM1,BLOC1S1,HYLS1,PSRC1,KIF2C,RPGRIP1L,ARHGAP35,ODF2,B9D2,RABL2B,CEP250,CDK1,PARD3,CDH3,DCTN3,EXOC4,TMEM67,CENPF,CTSC,PIK3CD,CBY1,UCHL1,PLK…
GO: Biological Process	GO:0000075	cell cycle checkpoint		3.307e-15	2.475e-11	6.346e-13	6.027e-12	46	233	BRIP1,TRRAP,CDC45,USP44,NDC80,CUL4A,MRE11,TICRR,GTSE1,DTL,BIRC5,MSH2,STIL,CLSPN,SOX4,AURKA,BRCA1,BUB1,BUB1B,ZWINT,CCNG1,H2AX,CDK1,CDC6,CDC20,TOP2A,PCNA,AURKB,CENPF,CHEK1,FOXN3,TRIP13,TTK,PRMT1,PLK1,ATF2,PRKDC,KNTC1,EME1,NSUN2,CDT1,DNA2,ZWILCH,E2F1,DYNC1LI1,MAD2L1
GO: Biological Process	GO:0033045	regulation of sister chromatid segregation		3.817e-15	2.856e-11	7.023e-13	6.671e-12	28	89	USP44,NDC80,FEN1,TACC3,BIRC5,CDCA5,ATRX,BUB1,BUB1B,CIT,CDC6,CDC20,AURKB,PTTG1,CENPF,TRIP13,TTK,RECQL4,PLK1,ANAPC4,RMI2,ESPL1,DLGAP5,FBXO5,SGO2,CDT1,DYNC1LI1,MAD2L1
GO: Biological Process	GO:0045786	negative regulation of cell cycle		3.848e-15	2.88e-11	7.023e-13	6.671e-12	87	677	BRIP1,SMC1A,RRAGB,JADE1,TRRAP,CDC45,USP44,NDC80,RBM14,AKT2,FGFR2,FOXM1,CUL4A,MRE11,TICRR,MYBBP1A,GTSE1,DTL,APBB1,BIRC5,MSH2,STIL,GADD45GIP1,MTOR,CLSPN,MYC,SOX4,ATRX,AURKA,PSME4,BRCA1,CDC123,BUB1,BUB1B,ZWINT,CCNF,CCNG1,DDIAS,H2AX,CDK1,CDC6,CDC20,TOP2A,PCNA,AURKB,CDKN2C,CDKN3,TMEM67,PTTG1,CENPF,CBX3,CHEK1,FOXN3,TRIP13,TTK,RECQL4,PKD1,FBXO7,NLE1,PRMT2,PRMT1,PLK1,ATF2,PPM1G,PRKAR1A,PRKDC,ESPL1,DAB2IP…
GO: Biological Process	GO:0042254	ribosome biogenesis		5.363e-15	4.013e-11	9.554e-13	9.075e-12	53	303	FBL,RPS2,MRM1,RPS7,RPS10,WDR18,NPM3,NAF1,RPF2,EMG1,CUL4A,MYBBP1A,XRN2,NOP16,LYAR,TBL3,PELP1,TSR1,FRG1,WDR12,WDR43,WDR3,MDN1,DIMT1,DDX18,C1QBP,BOP1,EBNA1BP2,LSM6,PA2G4,RRP9,PPAN,EXOSC8,NLE1,XPO1,MRPS9,MRPL36,MRPL11,MRPL1,ZNF658,EIF4A3,BMS1,URB1,PAK1IP1,HEATR3,RAN,RRP15,RPSA,HEATR1,TFB1M,MRTO4,RPL7,RBFA
GO: Biological Process	GO:0007093	mitotic cell cycle checkpoint		2.158e-14	1.614e-10	3.755e-12	3.566e-11	39	181	TRRAP,USP44,NDC80,MRE11,TICRR,GTSE1,BIRC5,MSH2,STIL,CLSPN,SOX4,AURKA,BRCA1,BUB1,BUB1B,ZWINT,CCNG1,CDK1,CDC6,CDC20,TOP2A,PCNA,AURKB,CENPF,CHEK1,FOXN3,TRIP13,TTK,PRMT1,PLK1,ATF2,PRKDC,KNTC1,EME1,CDT1,ZWILCH,E2F1,DYNC1LI1,MAD2L1
GO: Biological Process	GO:0006270	DNA replication initiation		2.235e-14	1.673e-10	3.801e-12	3.61e-11	21	51	SMC1A,WDR18,MCM2,MCM3,MCM5,MCM6,MCM7,MCM10,CDC45,MRE11,TICRR,MCM8,ORC2,CDC6,ORC6,POLA2,POLE2,PRIM1,PRIM2,FBXO5,CDT1
GO: Biological Process	GO:0051304	chromosome separation		5.888e-14	4.406e-10	9.791e-12	9.299e-11	28	98	USP44,RMI1,NDC80,TACC3,BIRC5,FANCM,BUB1,BUB1B,NCAPD3,NCAPH,CIT,CDC6,CDC20,TOP2A,AURKB,PTTG1,CENPF,TRIP13,TTK,PLK1,ANAPC4,ESPL1,EME1,DLGAP5,FBXO5,CDT1,DYNC1LI1,MAD2L1
GO: Biological Process	GO:0022613	ribonucleoprotein complex biogenesis		1.041e-13	7.789e-10	1.693e-11	1.608e-10	70	512	FBL,RPS2,MRM1,RPS7,RPS10,WDR18,NPM3,NUFIP1,MCTS2P,NAF1,RPF2,EMG1,CUL4A,TICRR,MYBBP1A,XRN2,SRSF1,NOP16,LYAR,TBL3,RUVBL1,PELP1,TSR1,FRG1,WDR12,EIF3B,SNRPB,SNRPD1,SNRPF,WDR43,WDR3,MDN1,TXNL4A,DIMT1,RBMX,DDX18,C1QBP,BOP1,EBNA1BP2,LSM6,PSIP1,PA2G4,RRP9,PPAN,EXOSC8,NLE1,PRMT7,WDR77,GEMIN5,XPO1,MRPS9,MRPL36,MRPL11,MRPL1,ZNF658,EIF4A3,BMS1,DHX9,URB1,PAK1IP1,HEATR3,RAN,RRP15,RPSA,HEATR1,G3BP1,TFB1M,MRTO4,…
GO: Biological Process	GO:0034660	ncRNA metabolic process		1.622e-13	1.214e-09	2.582e-11	2.453e-10	67	482	FBL,RPS2,MRM1,RPS7,WDR18,NPM3,NAF1,RPF2,EMG1,XRN2,OSGEP,LYAR,TBL3,KHSRP,SRRT,SEPHS1,PELP1,TSR1,FRG1,PUS1,WDR12,DTD1,WDR4,GARS1,NARS1,SSB,WDR43,WDR3,MDN1,DIMT1,DDX18,POP1,BOP1,EBNA1BP2,GTPBP3,MARS2,TSEN2,GRSF1,LSM6,PA2G4,RRP9,HSD17B10,GATB,EXOSC8,HNRNPA2B1,TSEN34,METTL2A,PUS7,PTCD1,MRPS9,MRPL1,EARS2,EIF4A3,BMS1,DARS1,NSUN2,URB1,TRDMT1,RAN,FARSB,RRP15,HEATR1,LIN28A,TFB1M,MRTO4,RPL7,RBFA
GO: Biological Process	GO:0006302	double-strand break repair		2.519e-13	1.885e-09	3.927e-11	3.73e-10	45	251	ERCC1,BRIP1,MCM2,MCM3,MCM5,MCM6,MCM7,CDC45,FANCB,RMI1,FEN1,RAD54L,FOXM1,MRE11,APBB1,GINS4,MSH2,RAD51AP1,GINS2,FUS,CDCA5,MCM8,BRCA1,TONSL,NSMCE1,OGG1,H2AX,SPIDR,CHEK1,TRIP13,AUNIP,RECQL4,RAD54B,NUCKS1,RMI2,XRCC5,PRKDC,EME1,DNA2,RAD51,MMS22L,WRAP53,ESCO2,LIG1,RPA3
GO: Biological Process	GO:0032508	DNA duplex unwinding		2.652e-13	1.985e-09	4.05e-11	3.847e-10	29	111	ERCC2,BRIP1,MCM2,MCM3,MCM5,MCM6,MCM7,ZRANB3,CDC45,CUL4A,MRE11,GINS4,RUVBL1,GINS2,ATRX,MCM8,TOP2A,RECQL4,RAD54B,DSCC1,XRCC5,ERCC6L,GINS1,DHX9,DNA2,RAD51,RFC4,RFC5,G3BP1
GO: Biological Process	GO:0010965	regulation of mitotic sister chromatid separation		3.027e-13	2.265e-09	4.53e-11	4.302e-10	22	63	USP44,NDC80,TACC3,BIRC5,BUB1,BUB1B,CIT,CDC6,CDC20,AURKB,PTTG1,CENPF,TRIP13,TTK,PLK1,ANAPC4,ESPL1,DLGAP5,FBXO5,CDT1,DYNC1LI1,MAD2L1
GO: Biological Process	GO:0045930	negative regulation of mitotic cell cycle		4.956e-13	3.709e-09	7.272e-11	6.907e-10	55	359	JADE1,TRRAP,USP44,NDC80,FGFR2,MRE11,TICRR,GTSE1,BIRC5,MSH2,STIL,GADD45GIP1,CLSPN,SOX4,ATRX,AURKA,PSME4,BRCA1,BUB1,BUB1B,ZWINT,CCNG1,DDIAS,CDK1,CDC6,CDC20,TOP2A,PCNA,AURKB,CDKN2C,PTTG1,CENPF,CHEK1,FOXN3,TRIP13,TTK,FBXO7,NLE1,PRMT2,PRMT1,PLK1,ATF2,PRKDC,KNTC1,EME1,PSMA2,PSMD3,FBXO5,PINX1,CDT1,ZWILCH,FZD3,E2F1,DYNC1LI1,MAD2L1
GO: Biological Process	GO:0051640	organelle localization		5.326e-13	3.986e-09	7.665e-11	7.28e-10	103	945	TBC1D19,NUSAP1,RABEPK,STX2,KIF18A,SPRY1,IFT43,TTC26,TBC1D24,S100A13,TUBB4B,NDC80,ZMYND10,FAM161A,FAM92A,NME5,FES,CC2D2A,SEMA6A,FGFR2,IFT80,TACC3,RSPH9,FLNA,IFT74,IFT81,TUBB,BIRC5,NLGN1,STIL,SHROOM2,SPAG5,WDR19,LRRC46,HAUS1,GALNT11,CEP70,CEP152,CDCA5,PLK4,STK36,CLUAP1,CENPJ,TOGARAM1,BLOC1S1,AURKA,HYLS1,PSRC1,KIF2C,RPGRIP1L,ARHGAP35,ODF2,B9D2,RABL2B,CEP250,CDK1,PARD3,CDH3,DCTN3,EXOC4,TMEM67,CENPF,C…
GO: Biological Process	GO:0044839	cell cycle G2/M phase transition		7.858e-13	5.88e-09	1.109e-10	1.054e-09	47	279	ATAD5,TUBB4B,MTA3,FOXM1,MRE11,TICRR,GTSE1,DTL,TUBB,BIRC5,HAUS1,TPX2,CEP70,CEP152,CLSPN,PLK4,CENPJ,AURKA,PSME4,BRCA1,ODF2,CIT,CCNA2,CCNG1,CCNB2,CEP250,CDK1,CDC6,CDC25A,DCTN3,AURKB,CENPF,CHEK1,FOXN3,HMMR,PLK1,CCP110,HAUS6,NDE1,PSMA2,PSMD3,SFI1,DCTN1,FBXO5,PINX1,LMNB1,KDM8
GO: Biological Process	GO:0051306	mitotic sister chromatid separation		9.007e-13	6.74e-09	1.244e-10	1.181e-09	22	66	USP44,NDC80,TACC3,BIRC5,BUB1,BUB1B,CIT,CDC6,CDC20,AURKB,PTTG1,CENPF,TRIP13,TTK,PLK1,ANAPC4,ESPL1,DLGAP5,FBXO5,CDT1,DYNC1LI1,MAD2L1
GO: Biological Process	GO:0000086	G2/M transition of mitotic cell cycle		9.142e-13	6.841e-09	1.244e-10	1.181e-09	45	260	TUBB4B,MTA3,FOXM1,MRE11,TICRR,DTL,TUBB,BIRC5,HAUS1,TPX2,CEP70,CEP152,CLSPN,PLK4,CENPJ,AURKA,PSME4,BRCA1,ODF2,CIT,CCNA2,CCNG1,CCNB2,CEP250,CDK1,CDC6,CDC25A,DCTN3,AURKB,CENPF,CHEK1,FOXN3,HMMR,PLK1,CCP110,HAUS6,NDE1,PSMA2,PSMD3,SFI1,DCTN1,FBXO5,PINX1,LMNB1,KDM8
GO: Biological Process	GO:0007091	metaphase/anaphase transition of mitotic cell cycle		9.966e-13	7.458e-09	1.332e-10	1.265e-09	21	60	USP44,NDC80,TACC3,BIRC5,BUB1,BUB1B,CIT,CDC6,CDC20,AURKB,CENPF,TRIP13,TTK,PLK1,ANAPC4,ESPL1,DLGAP5,FBXO5,CDT1,DYNC1LI1,MAD2L1
GO: Biological Process	GO:0034470	ncRNA processing		1.237e-12	9.255e-09	1.607e-10	1.527e-09	57	389	FBL,RPS2,MRM1,RPS7,WDR18,NPM3,NAF1,RPF2,EMG1,XRN2,OSGEP,LYAR,TBL3,SRRT,SEPHS1,PELP1,TSR1,FRG1,PUS1,WDR12,WDR4,SSB,WDR43,WDR3,MDN1,DIMT1,DDX18,POP1,BOP1,EBNA1BP2,GTPBP3,TSEN2,GRSF1,LSM6,PA2G4,RRP9,HSD17B10,EXOSC8,HNRNPA2B1,TSEN34,METTL2A,PUS7,PTCD1,MRPS9,MRPL1,EIF4A3,BMS1,NSUN2,URB1,TRDMT1,RRP15,HEATR1,LIN28A,TFB1M,MRTO4,RPL7,RBFA
GO: Biological Process	GO:1902749	regulation of cell cycle G2/M phase transition		1.246e-12	9.323e-09	1.607e-10	1.527e-09	41	223	ATAD5,TUBB4B,MTA3,MRE11,TICRR,GTSE1,DTL,TUBB,HAUS1,TPX2,CEP70,CEP152,CLSPN,PLK4,CENPJ,AURKA,PSME4,BRCA1,ODF2,CCNG1,CEP250,CDK1,CDC6,CDC25A,DCTN3,AURKB,CENPF,CHEK1,FOXN3,HMMR,PLK1,CCP110,HAUS6,NDE1,PSMA2,PSMD3,SFI1,DCTN1,FBXO5,PINX1,LMNB1
GO: Biological Process	GO:0000724	double-strand break repair via homologous recombination		1.377e-12	1.031e-08	1.747e-10	1.659e-09	31	134	MCM2,MCM3,MCM5,MCM6,MCM7,CDC45,FANCB,RMI1,FEN1,RAD54L,MRE11,GINS4,RAD51AP1,GINS2,FUS,MCM8,BRCA1,TONSL,NSMCE1,H2AX,SPIDR,CHEK1,AUNIP,RECQL4,RAD54B,NUCKS1,RMI2,RAD51,MMS22L,WRAP53,RPA3
GO: Biological Process	GO:0033047	regulation of mitotic sister chromatid segregation		1.46e-12	1.093e-08	1.811e-10	1.72e-09	23	74	USP44,NDC80,TACC3,BIRC5,ATRX,BUB1,BUB1B,CIT,CDC6,CDC20,AURKB,PTTG1,CENPF,TRIP13,TTK,PLK1,ANAPC4,ESPL1,DLGAP5,FBXO5,CDT1,DYNC1LI1,MAD2L1
GO: Biological Process	GO:0070925	organelle assembly		1.477e-12	1.105e-08	1.811e-10	1.72e-09	101	934	TBC1D19,MAP9,CENPW,RPS2,SMC1A,ACTA1,RPS10,IFT43,TTC26,TBC1D24,TUBB4B,ZMYND10,FAM161A,FAM92A,RPF2,NME5,RBM14,CC2D2A,IFT80,RSPH9,FLNA,IFT74,IFT81,TUBB,BIRC5,NLGN1,STIL,SPAG5,MSN,WDR19,LRRC46,HAUS1,GALNT11,TPX2,CEP70,CEP152,GOLGA8A,PLK4,MYBPC2,STK36,CLUAP1,CENPJ,CENPN,TOGARAM1,SIX4,CENPK,AURKA,MDN1,BRCA1,C1QBP,HYLS1,BOP1,RPGRIP1L,ARHGAP35,ODF2,B9D2,RABL2B,CEP250,CDK1,CDC20,DCTN3,AURKB,TMEM67,PPAN,CE…
GO: Biological Process	GO:0000725	recombinational repair		1.7e-12	1.272e-08	2.02e-10	1.919e-09	31	135	MCM2,MCM3,MCM5,MCM6,MCM7,CDC45,FANCB,RMI1,FEN1,RAD54L,MRE11,GINS4,RAD51AP1,GINS2,FUS,MCM8,BRCA1,TONSL,NSMCE1,H2AX,SPIDR,CHEK1,AUNIP,RECQL4,RAD54B,NUCKS1,RMI2,RAD51,MMS22L,WRAP53,RPA3
GO: Biological Process	GO:0010389	regulation of G2/M transition of mitotic cell cycle		1.701e-12	1.273e-08	2.02e-10	1.919e-09	39	206	TUBB4B,MTA3,MRE11,TICRR,DTL,TUBB,HAUS1,TPX2,CEP70,CEP152,CLSPN,PLK4,CENPJ,AURKA,PSME4,BRCA1,ODF2,CCNG1,CEP250,CDK1,CDC6,CDC25A,DCTN3,AURKB,CENPF,CHEK1,FOXN3,HMMR,PLK1,CCP110,HAUS6,NDE1,PSMA2,PSMD3,SFI1,DCTN1,FBXO5,PINX1,LMNB1
GO: Biological Process	GO:0031503	protein-containing complex localization		1.834e-12	1.373e-08	2.145e-10	2.037e-09	81	678	TBC1D19,NUP85,IFT43,TTC26,TBC1D24,TUBB4B,ZMYND10,FAM161A,FAM92A,NME5,CC2D2A,LRRC7,IFT80,RSPH9,FLNA,SRSF1,SRSF7,IFT74,IFT81,TUBB,BIRC5,NLGN1,STIL,NUP35,WDR19,LRRC46,NDC1,HAUS1,GALNT11,CEP70,CEP152,PLK4,STK36,CLUAP1,CENPJ,TOGARAM1,SSB,NUP205,HYLS1,RPGRIP1L,ARHGAP35,ODF2,B9D2,RABL2B,CEP250,CDK1,DCTN3,TMEM67,HNRNPA2B1,CBY1,PLK1,AKAP6,IFT22,PACSIN1,XPO1,THOC6,CCP110,HAUS6,NDE1,EIF4A3,KIAA0586,SFI1,DCT…
GO: Biological Process	GO:0001578	microtubule bundle formation		1.879e-12	1.406e-08	2.163e-10	2.054e-09	61	438	TBC1D19,IFT43,TTC26,TBC1D24,TUBB4B,ZMYND10,FAM161A,FAM92A,NME5,FES,CC2D2A,IFT80,RSPH9,FLNA,IFT74,IFT81,TUBB,STIL,WDR19,LRRC46,HAUS1,GALNT11,CEP70,CEP152,PLK4,STK36,CLUAP1,CENPJ,TOGARAM1,HYLS1,PSRC1,RPGRIP1L,ARHGAP35,ODF2,B9D2,RABL2B,CEP250,CDK1,DCTN3,TMEM67,CBY1,PLK1,IFT22,CCP110,HAUS6,NDE1,KIAA0586,SFI1,DCTN1,TMEM231,TCTN1,CCDC40,HDAC6,WDR34,IFT57,DYNC2H1,WDPCP,KIF20A,IFT52,CELSR3,BBS7
GO: Biological Process	GO:1905818	regulation of chromosome separation		2.507e-12	1.876e-08	2.842e-10	2.699e-09	22	69	USP44,NDC80,TACC3,BIRC5,BUB1,BUB1B,CIT,CDC6,CDC20,AURKB,PTTG1,CENPF,TRIP13,TTK,PLK1,ANAPC4,ESPL1,DLGAP5,FBXO5,CDT1,DYNC1LI1,MAD2L1
GO: Biological Process	GO:0044784	metaphase/anaphase transition of cell cycle		2.97e-12	2.222e-08	3.257e-10	3.094e-09	21	63	USP44,NDC80,TACC3,BIRC5,BUB1,BUB1B,CIT,CDC6,CDC20,AURKB,CENPF,TRIP13,TTK,PLK1,ANAPC4,ESPL1,DLGAP5,FBXO5,CDT1,DYNC1LI1,MAD2L1
GO: Biological Process	GO:0035082	axoneme assembly		3.134e-12	2.345e-08	3.257e-10	3.094e-09	58	409	TBC1D19,IFT43,TTC26,TBC1D24,TUBB4B,ZMYND10,FAM161A,FAM92A,NME5,CC2D2A,IFT80,RSPH9,FLNA,IFT74,IFT81,TUBB,STIL,WDR19,LRRC46,HAUS1,GALNT11,CEP70,CEP152,PLK4,STK36,CLUAP1,CENPJ,TOGARAM1,HYLS1,RPGRIP1L,ARHGAP35,ODF2,B9D2,RABL2B,CEP250,CDK1,DCTN3,TMEM67,CBY1,PLK1,IFT22,CCP110,HAUS6,NDE1,KIAA0586,SFI1,DCTN1,TMEM231,TCTN1,CCDC40,HDAC6,WDR34,IFT57,DYNC2H1,WDPCP,IFT52,CELSR3,BBS7
GO: Biological Process	GO:0060271	cilium assembly		3.134e-12	2.345e-08	3.257e-10	3.094e-09	58	409	TBC1D19,IFT43,TTC26,TBC1D24,TUBB4B,ZMYND10,FAM161A,FAM92A,NME5,CC2D2A,IFT80,RSPH9,FLNA,IFT74,IFT81,TUBB,STIL,WDR19,LRRC46,HAUS1,GALNT11,CEP70,CEP152,PLK4,STK36,CLUAP1,CENPJ,TOGARAM1,HYLS1,RPGRIP1L,ARHGAP35,ODF2,B9D2,RABL2B,CEP250,CDK1,DCTN3,TMEM67,CBY1,PLK1,IFT22,CCP110,HAUS6,NDE1,KIAA0586,SFI1,DCTN1,TMEM231,TCTN1,CCDC40,HDAC6,WDR34,IFT57,DYNC2H1,WDPCP,IFT52,CELSR3,BBS7
GO: Biological Process	GO:1905349	ciliary transition zone assembly		3.134e-12	2.345e-08	3.257e-10	3.094e-09	58	409	TBC1D19,IFT43,TTC26,TBC1D24,TUBB4B,ZMYND10,FAM161A,FAM92A,NME5,CC2D2A,IFT80,RSPH9,FLNA,IFT74,IFT81,TUBB,STIL,WDR19,LRRC46,HAUS1,GALNT11,CEP70,CEP152,PLK4,STK36,CLUAP1,CENPJ,TOGARAM1,HYLS1,RPGRIP1L,ARHGAP35,ODF2,B9D2,RABL2B,CEP250,CDK1,DCTN3,TMEM67,CBY1,PLK1,IFT22,CCP110,HAUS6,NDE1,KIAA0586,SFI1,DCTN1,TMEM231,TCTN1,CCDC40,HDAC6,WDR34,IFT57,DYNC2H1,WDPCP,IFT52,CELSR3,BBS7
GO: Biological Process	GO:0097712	vesicle targeting, trans-Golgi to periciliary membrane compartment		3.134e-12	2.345e-08	3.257e-10	3.094e-09	58	409	TBC1D19,IFT43,TTC26,TBC1D24,TUBB4B,ZMYND10,FAM161A,FAM92A,NME5,CC2D2A,IFT80,RSPH9,FLNA,IFT74,IFT81,TUBB,STIL,WDR19,LRRC46,HAUS1,GALNT11,CEP70,CEP152,PLK4,STK36,CLUAP1,CENPJ,TOGARAM1,HYLS1,RPGRIP1L,ARHGAP35,ODF2,B9D2,RABL2B,CEP250,CDK1,DCTN3,TMEM67,CBY1,PLK1,IFT22,CCP110,HAUS6,NDE1,KIAA0586,SFI1,DCTN1,TMEM231,TCTN1,CCDC40,HDAC6,WDR34,IFT57,DYNC2H1,WDPCP,IFT52,CELSR3,BBS7
GO: Biological Process	GO:0035735	intraciliary transport involved in cilium assembly		3.134e-12	2.345e-08	3.257e-10	3.094e-09	58	409	TBC1D19,IFT43,TTC26,TBC1D24,TUBB4B,ZMYND10,FAM161A,FAM92A,NME5,CC2D2A,IFT80,RSPH9,FLNA,IFT74,IFT81,TUBB,STIL,WDR19,LRRC46,HAUS1,GALNT11,CEP70,CEP152,PLK4,STK36,CLUAP1,CENPJ,TOGARAM1,HYLS1,RPGRIP1L,ARHGAP35,ODF2,B9D2,RABL2B,CEP250,CDK1,DCTN3,TMEM67,CBY1,PLK1,IFT22,CCP110,HAUS6,NDE1,KIAA0586,SFI1,DCTN1,TMEM231,TCTN1,CCDC40,HDAC6,WDR34,IFT57,DYNC2H1,WDPCP,IFT52,CELSR3,BBS7
GO: Biological Process	GO:0033046	negative regulation of sister chromatid segregation		3.311e-12	2.477e-08	3.394e-10	3.223e-09	19	51	USP44,NDC80,BIRC5,ATRX,BUB1,BUB1B,CDC20,AURKB,PTTG1,CENPF,TRIP13,TTK,RECQL4,PLK1,ESPL1,FBXO5,CDT1,DYNC1LI1,MAD2L1
GO: Biological Process	GO:0071824	protein-DNA complex subunit organization		4.143e-12	3.1e-08	4.19e-10	3.979e-09	54	367	CHAF1B,ERCC2,MIS18BP1,CENPW,HJURP,MCM2,MCM3,MCM5,MCM6,MCM7,CDC45,CENPP,NAF1,CUL4A,MRE11,CCT7,RUVBL1,CCT5,CENPI,SMARCA2,MYC,SOX9,SOX12,CENPN,ATRX,NAP1L1,NASP,CENPK,PSME4,MIS18A,H2AX,AURKB,HELLS,CENPF,HMGB1,OIP5,HMGB2,HNRNPA1,CENPM,SMYD3,PAF1,XRCC5,CENPH,ACD,PTMA,TELO2,PINX1,ANP32E,CDT1,RAD51,CENPU,WRAP53,GMNN,RPA3
GO: Biological Process	GO:0007088	regulation of mitotic nuclear division		4.47e-12	3.345e-08	4.46e-10	4.236e-09	36	184	NUSAP1,MAP9,SMC1A,USP44,NDC80,FGFR2,TACC3,BIRC5,CDCA5,ATRX,AURKA,BUB1,BUB1B,UBE2C,CIT,CDC6,CDC20,AURKB,PTTG1,CENPF,CHEK1,TRIP13,TTK,PLK1,ANAPC4,YWHAH,ESPL1,KNTC1,DLGAP5,FBXO5,CDT1,KIF11,RANBP1,DYNC1LI1,LRP5,MAD2L1
GO: Biological Process	GO:0000723	telomere maintenance		5.479e-12	4.1e-08	5.395e-10	5.124e-09	34	167	ERCC1,NAF1,FEN1,MRE11,APEX1,CCT7,CCT5,MYC,ATRX,EXO1,PCNA,AURKB,POLA2,HNRNPA1,HNRNPA2B1,RECQL4,POLD1,POLE2,XRCC5,PRIM1,PRIM2,PRKDC,ACD,TELO2,USP7,PINX1,DNA2,GNL3,RAD51,SMC6,WRAP53,RFC4,RFC5,RPA3
GO: Biological Process	GO:0045787	positive regulation of cell cycle		6.729e-12	5.036e-08	6.54e-10	6.211e-09	59	428	NUSAP1,ATAD5,CDC45,MTA3,NDC80,FEN1,FGFR2,CUL4A,MYBBP1A,GTSE1,DTL,APEX1,BIRC5,STIL,SPAG5,TRIM32,CDCA5,PLK4,MYC,SOX4,SOX15,CENPJ,ATRX,AURKA,BRCA1,DBF4,PSRC1,UBE2C,CIT,CDK1,CDC6,CDC25A,PCNA,AURKB,HMGB1,CHEK1,CKS1B,CKS2,PKD1,PRMT1,ANAPC4,KIF23,PAF1,ESPL1,DAB2IP,DLGAP5,FBXO5,FAM83D,SGO2,CDT1,RANBP1,E2F1,ECT2,LMNB1,DYNC1LI1,LRP5,CSPP1,MAD2L1,RPL17
GO: Biological Process	GO:0042073	intraciliary transport		7.035e-12	5.264e-08	6.749e-10	6.41e-09	58	417	TBC1D19,IFT43,TTC26,TBC1D24,TUBB4B,ZMYND10,FAM161A,FAM92A,NME5,CC2D2A,IFT80,RSPH9,FLNA,IFT74,IFT81,TUBB,STIL,WDR19,LRRC46,HAUS1,GALNT11,CEP70,CEP152,PLK4,STK36,CLUAP1,CENPJ,TOGARAM1,HYLS1,RPGRIP1L,ARHGAP35,ODF2,B9D2,RABL2B,CEP250,CDK1,DCTN3,TMEM67,CBY1,PLK1,IFT22,CCP110,HAUS6,NDE1,KIAA0586,SFI1,DCTN1,TMEM231,TCTN1,CCDC40,HDAC6,WDR34,IFT57,DYNC2H1,WDPCP,IFT52,CELSR3,BBS7
GO: Biological Process	GO:0033044	regulation of chromosome organization		7.749e-12	5.799e-08	7.34e-10	6.972e-09	55	384	ERCC1,JDP2,MCM2,CDC45,USP44,NDC80,NAF1,FEN1,TACC3,TADA3,MRE11,BIRC5,CCT7,PPHLN1,CCT5,TET1,CDCA5,MYC,ATRX,BRCA1,BUB1,BUB1B,CIT,CDC6,CDC20,TOP2A,AURKB,PTTG1,CENPF,CHEK1,TRIP13,TTK,HNRNPA1,HNRNPA2B1,RECQL4,PLK1,ANAPC4,RMI2,PAF1,XRCC5,ESPL1,ACD,DLGAP5,BCOR,JARID2,FBXO5,USP7,PINX1,SGO2,CDT1,GNL3,DNMT3B,TRIM28,DYNC1LI1,MAD2L1
GO: Biological Process	GO:0044782	cilium organization		9.016e-12	6.747e-08	8.434e-10	8.01e-09	59	431	TBC1D19,IFT43,TTC26,TBC1D24,TUBB4B,ZMYND10,FAM161A,FAM92A,NME5,CC2D2A,IFT80,RSPH9,FLNA,IFT74,IFT81,TUBB,STIL,WDR19,LRRC46,HAUS1,GALNT11,CEP70,CEP152,PLK4,STK36,CLUAP1,CENPJ,TOGARAM1,HYLS1,RPGRIP1L,ARHGAP35,ODF2,B9D2,RABL2B,CEP250,CDK1,DCTN3,TMEM67,CBY1,PLK1,IFT22,CCP110,HAUS6,NDE1,KIAA0586,SFI1,DCTN1,NECTIN2,TMEM231,TCTN1,CCDC40,HDAC6,WDR34,IFT57,DYNC2H1,WDPCP,IFT52,CELSR3,BBS7
GO: Biological Process	GO:0090068	positive regulation of cell cycle process		1.077e-11	8.056e-08	9.869e-10	9.373e-09	49	321	NUSAP1,ATAD5,CDC45,MTA3,NDC80,FEN1,CUL4A,MYBBP1A,GTSE1,DTL,APEX1,BIRC5,SPAG5,CDCA5,PLK4,SOX4,SOX15,CENPJ,ATRX,AURKA,BRCA1,DBF4,UBE2C,CIT,CDK1,CDC6,CDC25A,PCNA,AURKB,PRMT1,ANAPC4,KIF23,PAF1,ESPL1,DAB2IP,DLGAP5,FBXO5,FAM83D,SGO2,CDT1,RANBP1,E2F1,ECT2,LMNB1,DYNC1LI1,LRP5,CSPP1,MAD2L1,RPL17
GO: Biological Process	GO:0051985	negative regulation of chromosome segregation		1.081e-11	8.092e-08	9.869e-10	9.373e-09	19	54	USP44,NDC80,BIRC5,ATRX,BUB1,BUB1B,CDC20,AURKB,PTTG1,CENPF,TRIP13,TTK,RECQL4,PLK1,ESPL1,FBXO5,CDT1,DYNC1LI1,MAD2L1
GO: Biological Process	GO:0044843	cell cycle G1/S phase transition		1.208e-11	9.037e-08	1.089e-09	1.034e-08	49	322	MCM2,MCM3,MCM5,MCM6,MCM7,JADE1,MCM10,CDC45,CUL4A,GTSE1,APEX1,MYC,SOX4,MCM8,NASP,BCAT1,AURKA,DBF4,TCF19,GSPT1,CCNA2,ORC2,CDK1,CDC6,CDC25A,PCNA,CDKN2C,CDKN3,ORC6,POLA2,PKD1,FBXO7,PRMT2,PRMT1,IQGAP3,POLE2,PAF1,PRIM1,PRIM2,PRKDC,FBXO5,DHFR,FAM83D,CDT1,E2F1,E2F5,GMNN,RPA3,RPL17
GO: Biological Process	GO:0007098	centrosome cycle		1.262e-11	9.447e-08	1.125e-09	1.068e-08	29	128	MAP9,RBM14,FES,STIL,ARL2,HAUS1,CEP152,PLK4,CENPJ,AURKA,BRCA1,ODF2,CCNF,CEP250,CDK1,TMEM67,CETN3,CHEK1,PLK1,XPO1,ARHGEF10,CCP110,HAUS6,NDE1,DCTN1,KIAA0753,KIF11,RANBP1,DYNC1LI1
GO: Biological Process	GO:0051052	regulation of DNA metabolic process		1.298e-11	9.715e-08	1.143e-09	1.086e-08	55	389	ERCC1,ERCC2,ATAD5,USP9X,WDR18,ZRANB3,FANCB,NAF1,FOXM1,CUL4A,MRE11,TICRR,APBB1,CCT7,MSH2,RAD51AP1,CCT5,TET1,FUS,MYC,ATRX,BRCA1,MIS18A,OGG1,H2AX,SPIDR,PCNA,AURKB,HMGB1,CHEK1,PFN1,HNRNPA1,HNRNPA2B1,AUNIP,NUCKS1,DSCC1,RMI2,XRCC5,PRKDC,IL6,ACD,ANKLE1,DHX9,DFFA,USP7,PINX1,CDT1,GNL3,KPNA2,RAD51,WRAP53,RFC4,RFC5,TRIM28,ALYREF
GO: Biological Process	GO:0031023	microtubule organizing center organization		1.408e-11	1.053e-07	1.225e-09	1.163e-08	30	137	MAP9,RBM14,FES,STIL,ARL2,HAUS1,CEP152,PLK4,CENPJ,AURKA,BRCA1,ODF2,CCNF,CEP250,CDK1,TMEM67,CETN3,CHEK1,PLK1,XPO1,ARHGEF10,GCC2,CCP110,HAUS6,NDE1,DCTN1,KIAA0753,KIF11,RANBP1,DYNC1LI1
GO: Biological Process	GO:0061512	protein localization to cilium		1.696e-11	1.269e-07	1.445e-09	1.372e-08	58	426	TBC1D19,IFT43,TTC26,TBC1D24,TUBB4B,ZMYND10,FAM161A,FAM92A,NME5,CC2D2A,IFT80,RSPH9,FLNA,IFT74,IFT81,TUBB,STIL,WDR19,LRRC46,HAUS1,GALNT11,CEP70,CEP152,PLK4,STK36,CLUAP1,CENPJ,TOGARAM1,HYLS1,RPGRIP1L,ARHGAP35,ODF2,B9D2,RABL2B,CEP250,CDK1,DCTN3,TMEM67,CBY1,PLK1,IFT22,CCP110,HAUS6,NDE1,KIAA0586,SFI1,DCTN1,TMEM231,TCTN1,CCDC40,HDAC6,WDR34,IFT57,DYNC2H1,WDPCP,IFT52,CELSR3,BBS7
GO: Biological Process	GO:0065004	protein-DNA complex assembly		1.699e-11	1.272e-07	1.445e-09	1.372e-08	49	325	CHAF1B,ERCC2,MIS18BP1,CENPW,HJURP,MCM2,MCM3,MCM5,MCM6,MCM7,CDC45,CENPP,NAF1,CUL4A,MRE11,CCT7,RUVBL1,CCT5,CENPI,SMARCA2,SOX9,SOX12,CENPN,ATRX,NAP1L1,NASP,CENPK,MIS18A,H2AX,AURKB,HELLS,CENPF,HMGB1,OIP5,HMGB2,HNRNPA1,CENPM,SMYD3,XRCC5,CENPH,ACD,TELO2,PINX1,CDT1,RAD51,CENPU,WRAP53,GMNN,RPA3
GO: Biological Process	GO:0051783	regulation of nuclear division		2.131e-11	1.595e-07	1.792e-09	1.702e-08	38	213	NUSAP1,MAP9,SMC1A,USP44,NDC80,FGFR2,TACC3,BIRC5,CDCA5,ATRX,AURKA,BUB1,BUB1B,UBE2C,CIT,CDC6,CDC20,AURKB,PTTG1,CENPF,CHEK1,TRIP13,TTK,PLK1,ANAPC4,YWHAH,PRKAR1A,ESPL1,KNTC1,DLGAP5,FBXO5,SGO2,CDT1,KIF11,RANBP1,DYNC1LI1,LRP5,MAD2L1
GO: Biological Process	GO:0030071	regulation of mitotic metaphase/anaphase transition		2.265e-11	1.695e-07	1.883e-09	1.788e-08	19	56	USP44,NDC80,BIRC5,BUB1,BUB1B,CDC6,CDC20,AURKB,CENPF,TRIP13,TTK,PLK1,ANAPC4,ESPL1,DLGAP5,FBXO5,CDT1,DYNC1LI1,MAD2L1
GO: Biological Process	GO:0071459	protein localization to chromosome, centromeric region		2.717e-11	2.033e-07	2.218e-09	2.107e-08	20	63	MIS18BP1,CENPW,HJURP,CENPP,NDC80,RUVBL1,CENPI,CENPN,NASP,CENPK,BUB1B,MIS18A,CDK1,AURKB,OIP5,TTK,CENPM,CENPH,CDT1,CENPU
GO: Biological Process	GO:0033043	regulation of organelle organization		2.727e-11	2.041e-07	2.218e-09	2.107e-08	130	1391	TBC1D19,NUSAP1,KIF18A,MAP9,ERCC1,SMC1A,LAPTM4B,JDP2,MCM2,F2RL1,ADD3,TBC1D24,CDC45,USP44,DLC1,NDC80,ZMYND10,NAF1,FEN1,RBM14,FES,AKT2,FGFR2,TACC3,CAMSAP1,TADA3,MRE11,FLNA,PPM1E,ARFGEF1,BIRC5,CCT7,PPHLN1,STIL,SHROOM2,SPAG5,PDLIM4,MSN,ARL2,CCT5,MTOR,TET1,MYO1F,TPX2,CEP70,CDCA5,PLK4,MYC,CENPJ,ATRX,SPTBN1,TOGARAM1,BIK,AURKA,BRCA1,BUB1,VAMP1,BUB1B,MLLT11,YWHAQ,PSRC1,UBE2C,ARHGAP35,ODF2,CIT,CCNF,DDHD1,CE…
GO: Biological Process	GO:0010948	negative regulation of cell cycle process		3.019e-11	2.259e-07	2.411e-09	2.29e-08	54	386	SMC1A,JADE1,USP44,NDC80,RBM14,FGFR2,MRE11,TICRR,GTSE1,DTL,BIRC5,CLSPN,SOX4,ATRX,AURKA,PSME4,BRCA1,BUB1,BUB1B,CCNF,CCNG1,CDK1,CDC6,CDC20,PCNA,AURKB,CDKN2C,TMEM67,PTTG1,CENPF,CBX3,CHEK1,FOXN3,TRIP13,TTK,RECQL4,FBXO7,PRMT2,PRMT1,PLK1,PRKAR1A,PRKDC,ESPL1,DAB2IP,PCGF2,PSMA2,PSMD3,FBXO5,PINX1,CDT1,RAD51,E2F1,DYNC1LI1,MAD2L1
GO: Biological Process	GO:0007051	spindle organization		3.028e-11	2.266e-07	2.411e-09	2.29e-08	36	196	MAP9,CENPW,SMC1A,SPC25,NDC80,TACC3,FLNA,TUBB,BIRC5,STIL,SPAG5,HAUS1,TPX2,GOLGA8A,CENPJ,ATRX,AURKA,PSRC1,CDC20,AURKB,TTK,AUNIP,PKD1,PLK1,KIF23,ARHGEF10,ESPL1,HAUS6,KIF4A,NUF2,DCTN1,FBXO5,KIF11,KIFC1,RAN,RANBP1
GO: Biological Process	GO:0006364	rRNA processing		3.789e-11	2.836e-07	2.985e-09	2.835e-08	38	217	FBL,RPS2,MRM1,RPS7,WDR18,NPM3,NAF1,RPF2,EMG1,XRN2,LYAR,TBL3,PELP1,TSR1,FRG1,WDR12,WDR43,WDR3,MDN1,DIMT1,DDX18,BOP1,EBNA1BP2,LSM6,PA2G4,RRP9,EXOSC8,MRPS9,MRPL1,EIF4A3,BMS1,URB1,RRP15,HEATR1,TFB1M,MRTO4,RPL7,RBFA
GO: Biological Process	GO:0000082	G1/S transition of mitotic cell cycle		3.966e-11	2.968e-07	3.03e-09	2.878e-08	46	300	MCM2,MCM3,MCM5,MCM6,MCM7,JADE1,MCM10,CDC45,CUL4A,GTSE1,APEX1,MYC,SOX4,MCM8,NASP,BCAT1,AURKA,DBF4,TCF19,GSPT1,ORC2,CDK1,CDC6,CDC25A,PCNA,CDKN2C,CDKN3,ORC6,POLA2,PKD1,FBXO7,PRMT2,PRMT1,IQGAP3,POLE2,PRIM1,PRIM2,PRKDC,FBXO5,DHFR,CDT1,E2F1,E2F5,GMNN,RPA3,RPL17
GO: Biological Process	GO:0099118	microtubule-based protein transport		3.969e-11	2.97e-07	3.03e-09	2.878e-08	58	435	TBC1D19,IFT43,TTC26,TBC1D24,TUBB4B,ZMYND10,FAM161A,FAM92A,NME5,CC2D2A,IFT80,RSPH9,FLNA,IFT74,IFT81,TUBB,STIL,WDR19,LRRC46,HAUS1,GALNT11,CEP70,CEP152,PLK4,STK36,CLUAP1,CENPJ,TOGARAM1,HYLS1,RPGRIP1L,ARHGAP35,ODF2,B9D2,RABL2B,CEP250,CDK1,DCTN3,TMEM67,CBY1,PLK1,IFT22,CCP110,HAUS6,NDE1,KIAA0586,SFI1,DCTN1,TMEM231,TCTN1,CCDC40,HDAC6,WDR34,IFT57,DYNC2H1,WDPCP,IFT52,CELSR3,BBS7
GO: Biological Process	GO:0098840	protein transport along microtubule		3.969e-11	2.97e-07	3.03e-09	2.878e-08	58	435	TBC1D19,IFT43,TTC26,TBC1D24,TUBB4B,ZMYND10,FAM161A,FAM92A,NME5,CC2D2A,IFT80,RSPH9,FLNA,IFT74,IFT81,TUBB,STIL,WDR19,LRRC46,HAUS1,GALNT11,CEP70,CEP152,PLK4,STK36,CLUAP1,CENPJ,TOGARAM1,HYLS1,RPGRIP1L,ARHGAP35,ODF2,B9D2,RABL2B,CEP250,CDK1,DCTN3,TMEM67,CBY1,PLK1,IFT22,CCP110,HAUS6,NDE1,KIAA0586,SFI1,DCTN1,TMEM231,TCTN1,CCDC40,HDAC6,WDR34,IFT57,DYNC2H1,WDPCP,IFT52,CELSR3,BBS7
GO: Biological Process	GO:0032200	telomere organization		4.832e-11	3.615e-07	3.652e-09	3.468e-08	34	180	ERCC1,NAF1,FEN1,MRE11,APEX1,CCT7,CCT5,MYC,ATRX,EXO1,PCNA,AURKB,POLA2,HNRNPA1,HNRNPA2B1,RECQL4,POLD1,POLE2,XRCC5,PRIM1,PRIM2,PRKDC,ACD,TELO2,USP7,PINX1,DNA2,GNL3,RAD51,SMC6,WRAP53,RFC4,RFC5,RPA3
GO: Biological Process	GO:0006886	intracellular protein transport		5.041e-11	3.772e-07	3.772e-09	3.583e-08	139	1536	TBC1D19,STX2,RAB19,RPL34,RPL36A,NUP85,RPS2,USP9X,RPS7,RPS10,IFT43,TTC26,TBC1D24,TUBB4B,ZMYND10,FAM161A,FAM92A,MIPEP,NME5,CC2D2A,AKT2,LRRC7,IFT80,TIMM44,RSPH9,FLNA,SRSF1,ANGPT1,SRSF7,IFT74,SCG5,IFT81,GTSE1,FERMT1,TUBB,NBEA,NLGN1,STIL,NUP35,ARF5,WDR19,LRRC46,NDC1,TIMM21,HAUS1,GALNT11,CEP70,CEP152,ATP1B1,SUFU,PLK4,SORL1,STK36,PECR,CLUAP1,CENPJ,EXPH5,TOGARAM1,SSB,NUP205,ARL6IP1,HYLS1,YWHAQ,RPGRIP1L,I…
GO: Biological Process	GO:1902099	regulation of metaphase/anaphase transition of cell cycle		6.423e-11	4.807e-07	4.759e-09	4.52e-08	19	59	USP44,NDC80,BIRC5,BUB1,BUB1B,CDC6,CDC20,AURKB,CENPF,TRIP13,TTK,PLK1,ANAPC4,ESPL1,DLGAP5,FBXO5,CDT1,DYNC1LI1,MAD2L1
GO: Biological Process	GO:0099111	microtubule-based transport		6.617e-11	4.952e-07	4.855e-09	4.611e-08	66	537	TBC1D19,IFT43,TTC26,TBC1D24,TUBB4B,ZMYND10,FAM161A,FAM92A,NME5,CC2D2A,IFT80,RSPH9,FLNA,IFT74,IFT81,TUBB,STIL,WDR19,LRRC46,HAUS1,GALNT11,CEP70,CEP152,PLK4,SOD1,STK36,CLUAP1,CENPJ,TOGARAM1,BLOC1S1,HYLS1,RPGRIP1L,ARHGAP35,ODF2,B9D2,RABL2B,CEP250,CDK1,DCTN3,TMEM67,CBY1,UCHL1,PLK1,KIF23,IFT22,DPCD,CCP110,HAUS6,NDE1,KIAA0586,KIF4A,SFI1,DCTN1,TMEM231,TCTN1,CCDC40,HDAC6,WDR34,IFT57,DYNC2H1,WDPCP,LRPPRC,I…
GO: Biological Process	GO:0030705	cytoskeleton-dependent intracellular transport		9.13e-11	6.832e-07	6.633e-09	6.3e-08	66	541	TBC1D19,IFT43,TTC26,TBC1D24,TUBA1B,TUBB4B,ZMYND10,FAM161A,FAM92A,NME5,CC2D2A,IFT80,RSPH9,FLNA,IFT74,IFT81,TUBB,STIL,WDR19,LRRC46,HAUS1,GALNT11,CEP70,CEP152,PLK4,SOD1,STK36,CLUAP1,CENPJ,TOGARAM1,BLOC1S1,HYLS1,RPGRIP1L,TUBA1C,ARHGAP35,ODF2,B9D2,RABL2B,CEP250,CDK1,DCTN3,TMEM67,CBY1,UCHL1,PLK1,KIF23,IFT22,CCP110,HAUS6,NDE1,KIAA0586,KIF4A,SFI1,DCTN1,TMEM231,TCTN1,CCDC40,HDAC6,WDR34,IFT57,DYNC2H1,WDPCP…
GO: Biological Process	GO:0120031	plasma membrane bounded cell projection assembly		9.724e-11	7.276e-07	6.997e-09	6.645e-08	80	720	TBC1D19,STX2,NUP85,F2RL1,TENM2,IFT43,TTC26,TBC1D24,TUBB4B,DLC1,ZMYND10,FAM161A,FAM92A,NME5,FGD1,CC2D2A,IFT80,RSPH9,FLNA,IFT74,IFT81,TUBB,NLGN1,STIL,WDR19,LRRC46,HAUS1,MTOR,GALNT11,CEP70,CEP152,PLK4,STK36,CLUAP1,ATP7A,CENPJ,TOGARAM1,HYLS1,RPGRIP1L,CASP6,ARHGAP35,ODF2,B9D2,RABL2B,CEP250,CDK1,TOP2A,DCTN3,TMEM67,CORO1C,ZMYND8,HMGB1,HMGB2,TWF2,PFN1,CBY1,PLK1,IFT22,IL6,CCP110,HAUS6,NDE1,KIAA0586,SFI1,D…
GO: Biological Process	GO:0051054	positive regulation of DNA metabolic process		1.003e-10	7.503e-07	7.145e-09	6.786e-08	37	214	ERCC1,ERCC2,ATAD5,USP9X,FANCB,NAF1,FOXM1,MRE11,APBB1,CCT7,MSH2,CCT5,FUS,MYC,ATRX,BRCA1,H2AX,SPIDR,PCNA,AURKB,HMGB1,PFN1,HNRNPA1,HNRNPA2B1,DSCC1,XRCC5,PRKDC,IL6,ACD,DHX9,USP7,GNL3,RAD51,WRAP53,RFC4,RFC5,TRIM28
GO: Biological Process	GO:0033048	negative regulation of mitotic sister chromatid segregation		1.175e-10	8.795e-07	8.297e-09	7.88e-08	17	48	USP44,NDC80,BIRC5,ATRX,BUB1,BUB1B,CDC20,AURKB,PTTG1,CENPF,TRIP13,TTK,PLK1,FBXO5,CDT1,DYNC1LI1,MAD2L1
GO: Biological Process	GO:0007018	microtubule-based movement		1.193e-10	8.928e-07	8.344e-09	7.925e-08	76	671	TBC1D19,KIF18A,IFT43,TTC26,TBC1D24,TUBB4B,ZMYND10,FAM161A,FAM92A,NME5,CC2D2A,IFT80,RSPH9,FLNA,IFT74,IFT81,TUBB,STIL,WDR19,LRRC46,HAUS1,GALNT11,CEP70,CEP152,PLK4,SOD1,STK36,CLUAP1,CENPJ,TOGARAM1,BLOC1S1,HYLS1,KIF2C,RPGRIP1L,ARHGAP35,ODF2,B9D2,RABL2B,CEP250,CDK1,DCTN3,TMEM67,CBY1,UCHL1,PLK1,KIF23,IFT22,DPCD,CCP110,HAUS6,NDE1,KIAA0586,DLGAP5,KIF4A,SFI1,DCTN1,KIF15,TMEM231,TCTN1,KIF11,KIFC1,KIF22,CCD…
GO: Biological Process	GO:0045839	negative regulation of mitotic nuclear division		1.237e-10	9.253e-07	8.568e-09	8.138e-08	19	61	USP44,NDC80,FGFR2,BIRC5,ATRX,BUB1,BUB1B,CDC20,AURKB,PTTG1,CENPF,CHEK1,TRIP13,TTK,PLK1,FBXO5,CDT1,DYNC1LI1,MAD2L1
GO: Biological Process	GO:0006903	vesicle targeting		1.27e-10	9.503e-07	8.711e-09	8.274e-08	62	496	TBC1D19,IFT43,TTC26,TBC1D24,TUBB4B,ZMYND10,FAM161A,FAM92A,NME5,CC2D2A,IFT80,RSPH9,FLNA,IFT74,IFT81,TUBB,NLGN1,STIL,WDR19,LRRC46,HAUS1,GALNT11,CEP70,CEP152,PLK4,STK36,CLUAP1,CENPJ,TOGARAM1,HYLS1,RPGRIP1L,ARHGAP35,ODF2,B9D2,RABL2B,CEP250,CDK1,DCTN3,EXOC4,TMEM67,CTSC,CBY1,PLK1,IFT22,CCP110,HAUS6,NDE1,KIAA0586,SFI1,DCTN1,TMEM231,TCTN1,CCDC40,HDAC6,WDR34,IFT57,DYNC2H1,AP1M2,WDPCP,IFT52,CELSR3,BBS7
GO: Biological Process	GO:1902850	microtubule cytoskeleton organization involved in mitosis		1.281e-10	9.582e-07	8.711e-09	8.274e-08	29	140	NUSAP1,SPRY1,MAP9,SMC1A,SPC25,NDC80,TACC3,FLNA,BIRC5,STIL,TPX2,AURKA,PSRC1,CDC20,AURKB,TTK,PKD1,PLK1,KIF23,ARHGEF10,ESPL1,NDE1,KIF4A,NUF2,DCTN1,KIF11,KIFC1,RAN,MAD2L1
GO: Biological Process	GO:0016072	rRNA metabolic process		1.945e-10	1.455e-06	1.311e-08	1.245e-07	38	229	FBL,RPS2,MRM1,RPS7,WDR18,NPM3,NAF1,RPF2,EMG1,XRN2,LYAR,TBL3,PELP1,TSR1,FRG1,WDR12,WDR43,WDR3,MDN1,DIMT1,DDX18,BOP1,EBNA1BP2,LSM6,PA2G4,RRP9,EXOSC8,MRPS9,MRPL1,EIF4A3,BMS1,URB1,RRP15,HEATR1,TFB1M,MRTO4,RPL7,RBFA
GO: Biological Process	GO:0006323	DNA packaging		1.987e-10	1.487e-06	1.328e-08	1.261e-07	37	219	NUSAP1,CHAF1B,MIS18BP1,CENPW,HJURP,MCM2,CENPP,SMC2,RUVBL1,CENPI,SMARCA2,CDCA5,SOX9,CENPN,ATRX,NAP1L1,NASP,CENPK,CDAN1,NCAPG,PSME4,NCAPD3,MIS18A,NCAPH,H2AX,CDK1,TOP2A,HELLS,HMGB1,OIP5,HMGB2,CENPM,SMYD3,PAF1,CENPH,NCAPG2,CENPU
GO: Biological Process	GO:0010970	transport along microtubule		2.145e-10	1.605e-06	1.421e-08	1.349e-07	64	527	TBC1D19,IFT43,TTC26,TBC1D24,TUBB4B,ZMYND10,FAM161A,FAM92A,NME5,CC2D2A,IFT80,RSPH9,FLNA,IFT74,IFT81,TUBB,STIL,WDR19,LRRC46,HAUS1,GALNT11,CEP70,CEP152,PLK4,SOD1,STK36,CLUAP1,CENPJ,TOGARAM1,BLOC1S1,HYLS1,RPGRIP1L,ARHGAP35,ODF2,B9D2,RABL2B,CEP250,CDK1,DCTN3,TMEM67,CBY1,UCHL1,PLK1,KIF23,IFT22,CCP110,HAUS6,NDE1,KIAA0586,KIF4A,SFI1,DCTN1,TMEM231,TCTN1,CCDC40,HDAC6,WDR34,IFT57,DYNC2H1,WDPCP,LRPPRC,IFT52,…
GO: Biological Process	GO:0030031	cell projection assembly		2.47e-10	1.848e-06	1.621e-08	1.54e-07	80	734	TBC1D19,STX2,NUP85,F2RL1,TENM2,IFT43,TTC26,TBC1D24,TUBB4B,DLC1,ZMYND10,FAM161A,FAM92A,NME5,FGD1,CC2D2A,IFT80,RSPH9,FLNA,IFT74,IFT81,TUBB,NLGN1,STIL,WDR19,LRRC46,HAUS1,MTOR,GALNT11,CEP70,CEP152,PLK4,STK36,CLUAP1,ATP7A,CENPJ,TOGARAM1,HYLS1,RPGRIP1L,CASP6,ARHGAP35,ODF2,B9D2,RABL2B,CEP250,CDK1,TOP2A,DCTN3,TMEM67,CORO1C,ZMYND8,HMGB1,HMGB2,TWF2,PFN1,CBY1,PLK1,IFT22,IL6,CCP110,HAUS6,NDE1,KIAA0586,SFI1,D…
GO: Biological Process	GO:0031577	spindle checkpoint		2.625e-10	1.964e-06	1.708e-08	1.622e-07	16	44	USP44,NDC80,BIRC5,STIL,AURKA,BUB1,BUB1B,CDC20,AURKB,CENPF,TRIP13,TTK,PLK1,CDT1,DYNC1LI1,MAD2L1
GO: Biological Process	GO:2001251	negative regulation of chromosome organization		2.874e-10	2.15e-06	1.854e-08	1.761e-07	31	163	ERCC1,MCM2,USP44,NDC80,BIRC5,TET1,ATRX,BRCA1,BUB1,BUB1B,CDC20,TOP2A,AURKB,PTTG1,CENPF,TRIP13,TTK,HNRNPA1,RECQL4,PLK1,XRCC5,ESPL1,ACD,BCOR,JARID2,FBXO5,PINX1,CDT1,DNMT3B,DYNC1LI1,MAD2L1
GO: Biological Process	GO:0051784	negative regulation of nuclear division		3.053e-10	2.284e-06	1.952e-08	1.854e-07	20	71	USP44,NDC80,FGFR2,BIRC5,ATRX,BUB1,BUB1B,CDC20,AURKB,PTTG1,CENPF,CHEK1,TRIP13,TTK,PLK1,PRKAR1A,FBXO5,CDT1,DYNC1LI1,MAD2L1
GO: Biological Process	GO:2000816	negative regulation of mitotic sister chromatid separation		3.878e-10	2.902e-06	2.459e-08	2.336e-07	16	45	USP44,NDC80,BIRC5,BUB1,BUB1B,CDC20,AURKB,PTTG1,CENPF,TRIP13,TTK,PLK1,FBXO5,CDT1,DYNC1LI1,MAD2L1
GO: Biological Process	GO:0071168	protein localization to chromatin		5.273e-10	3.946e-06	3.316e-08	3.149e-07	20	73	MIS18BP1,CENPW,HJURP,CENPP,PPHLN1,MSH2,RUVBL1,CENPI,CDCA5,CENPN,MCM8,NASP,CENPK,MIS18A,OIP5,CENPM,PLK1,CENPH,CENPU,ESCO2
GO: Biological Process	GO:0048199	vesicle targeting, to, from or within Golgi		6.394e-10	4.785e-06	3.987e-08	3.787e-07	59	479	TBC1D19,IFT43,TTC26,TBC1D24,TUBB4B,ZMYND10,FAM161A,FAM92A,NME5,CC2D2A,IFT80,RSPH9,FLNA,IFT74,IFT81,TUBB,STIL,WDR19,LRRC46,HAUS1,GALNT11,CEP70,CEP152,PLK4,STK36,CLUAP1,CENPJ,TOGARAM1,HYLS1,RPGRIP1L,ARHGAP35,ODF2,B9D2,RABL2B,CEP250,CDK1,DCTN3,TMEM67,CTSC,CBY1,PLK1,IFT22,CCP110,HAUS6,NDE1,KIAA0586,SFI1,DCTN1,TMEM231,TCTN1,CCDC40,HDAC6,WDR34,IFT57,DYNC2H1,WDPCP,IFT52,CELSR3,BBS7
GO: Biological Process	GO:0051650	establishment of vesicle localization		7.362e-10	5.509e-06	4.553e-08	4.324e-07	67	581	TBC1D19,IFT43,TTC26,TBC1D24,TUBB4B,ZMYND10,FAM161A,FAM92A,NME5,CC2D2A,FGFR2,IFT80,RSPH9,FLNA,IFT74,IFT81,TUBB,NLGN1,STIL,SHROOM2,WDR19,LRRC46,HAUS1,GALNT11,CEP70,CEP152,PLK4,STK36,CLUAP1,CENPJ,TOGARAM1,BLOC1S1,HYLS1,RPGRIP1L,ARHGAP35,ODF2,B9D2,RABL2B,CEP250,CDK1,CDH3,DCTN3,EXOC4,TMEM67,CTSC,CBY1,PLK1,KIF23,IFT22,CCP110,HAUS6,NDE1,KIAA0586,SFI1,DCTN1,TMEM231,TCTN1,CCDC40,HDAC6,WDR34,IFT57,DYNC2H1,…
GO: Biological Process	GO:1905819	negative regulation of chromosome separation		8.171e-10	6.114e-06	5.012e-08	4.76e-07	16	47	USP44,NDC80,BIRC5,BUB1,BUB1B,CDC20,AURKB,PTTG1,CENPF,TRIP13,TTK,PLK1,FBXO5,CDT1,DYNC1LI1,MAD2L1
GO: Biological Process	GO:0045841	negative regulation of mitotic metaphase/anaphase transition		1.28e-09	9.582e-06	7.727e-08	7.339e-07	15	42	USP44,NDC80,BIRC5,BUB1,BUB1B,CDC20,AURKB,CENPF,TRIP13,TTK,PLK1,FBXO5,CDT1,DYNC1LI1,MAD2L1
GO: Biological Process	GO:0071174	mitotic spindle checkpoint		1.28e-09	9.582e-06	7.727e-08	7.339e-07	15	42	USP44,NDC80,BIRC5,STIL,BUB1,BUB1B,CDC20,AURKB,CENPF,TRIP13,TTK,PLK1,CDT1,DYNC1LI1,MAD2L1
GO: Biological Process	GO:0006275	regulation of DNA replication		1.462e-09	1.094e-05	8.753e-08	8.313e-07	25	118	ATAD5,SMC1A,WDR18,ZRANB3,MRE11,TICRR,CACYBP,ATRX,CDAN1,DBF4,CCNA2,CDK1,CDC6,PCNA,NUCKS1,DSCC1,IL6,DHX9,FBXO5,CDT1,DNA2,RFC4,RFC5,GMNN,ESCO2
GO: Biological Process	GO:0034622	cellular protein-containing complex assembly		1.871e-09	1.4e-05	1.111e-07	1.056e-06	116	1276	CHAF1B,ERCC2,MIS18BP1,CENPW,RPS2,HJURP,RPS10,MCM2,MCM3,MCM5,MCM6,MCM7,COA4,ADD3,NUFIP1,CDC45,CENPP,MCTS2P,ZMYND10,NAF1,RPF2,FES,CAMSAP1,CUL4A,MRE11,TICRR,FOXRED1,SRSF1,ANGPT1,ARFGEF1,CCT7,ARL2,NDC1,RUVBL1,TIMM21,CCT5,MTOR,CENPI,SMARCA2,EIF3B,SNRPB,SNRPD1,SNRPF,MYBPC2,ATP5F1D,LYRM7,SOX9,SOX12,CENPJ,CENPN,ATRX,SPTBN1,NAP1L1,NASP,TOGARAM1,NDUFA9,NDUFB3,CENPK,NDUFS6,NUP205,MDN1,TXNL4A,RBMX,VAMP1,C1QB…
GO: Biological Process	GO:0097711	ciliary basal body-plasma membrane docking		2.404e-09	1.799e-05	1.417e-07	1.345e-06	22	95	TUBB4B,CC2D2A,TUBB,HAUS1,CEP70,CEP152,PLK4,CENPJ,RPGRIP1L,ODF2,B9D2,CEP250,CDK1,DCTN3,TMEM67,PLK1,CCP110,HAUS6,NDE1,SFI1,DCTN1,TCTN1
GO: Biological Process	GO:0031297	replication fork processing		2.557e-09	1.913e-05	1.495e-07	1.42e-06	13	32	ZRANB3,MRE11,FANCM,ATRX,TONSL,PCNA,NUCKS1,BOD1L1,EME1,DNA2,RAD51,MMS22L,ALYREF
GO: Biological Process	GO:1902100	negative regulation of metaphase/anaphase transition of cell cycle		2.705e-09	2.024e-05	1.569e-07	1.49e-06	15	44	USP44,NDC80,BIRC5,BUB1,BUB1B,CDC20,AURKB,CENPF,TRIP13,TTK,PLK1,FBXO5,CDT1,DYNC1LI1,MAD2L1
GO: Biological Process	GO:0051648	vesicle localization		2.798e-09	2.094e-05	1.61e-07	1.53e-06	67	600	TBC1D19,IFT43,TTC26,TBC1D24,TUBB4B,ZMYND10,FAM161A,FAM92A,NME5,CC2D2A,FGFR2,IFT80,RSPH9,FLNA,IFT74,IFT81,TUBB,NLGN1,STIL,SHROOM2,WDR19,LRRC46,HAUS1,GALNT11,CEP70,CEP152,PLK4,STK36,CLUAP1,CENPJ,TOGARAM1,BLOC1S1,HYLS1,RPGRIP1L,ARHGAP35,ODF2,B9D2,RABL2B,CEP250,CDK1,CDH3,DCTN3,EXOC4,TMEM67,CTSC,CBY1,PLK1,KIF23,IFT22,CCP110,HAUS6,NDE1,KIAA0586,SFI1,DCTN1,TMEM231,TCTN1,CCDC40,HDAC6,WDR34,IFT57,DYNC2H1,…
GO: Biological Process	GO:0007052	mitotic spindle organization		2.945e-09	2.204e-05	1.682e-07	1.598e-06	24	113	MAP9,SMC1A,SPC25,NDC80,TACC3,FLNA,BIRC5,STIL,TPX2,AURKA,PSRC1,CDC20,AURKB,TTK,PKD1,PLK1,KIF23,ARHGEF10,KIF4A,NUF2,DCTN1,KIF11,KIFC1,RAN
GO: Biological Process	GO:1901991	negative regulation of mitotic cell cycle phase transition		3.602e-09	2.696e-05	2.042e-07	1.94e-06	39	264	JADE1,USP44,NDC80,MRE11,TICRR,GTSE1,BIRC5,CLSPN,SOX4,AURKA,PSME4,BRCA1,BUB1,BUB1B,CCNG1,CDK1,CDC6,CDC20,PCNA,AURKB,CDKN2C,CENPF,CHEK1,FOXN3,TRIP13,TTK,FBXO7,PRMT2,PRMT1,PLK1,PRKDC,PSMA2,PSMD3,FBXO5,PINX1,CDT1,E2F1,DYNC1LI1,MAD2L1
GO: Biological Process	GO:0070507	regulation of microtubule cytoskeleton organization		5.146e-09	3.851e-05	2.896e-07	2.75e-06	33	203	KIF18A,MAP9,SMC1A,RBM14,FES,TACC3,CAMSAP1,STIL,SPAG5,ARL2,TPX2,CEP70,PLK4,CENPJ,TOGARAM1,AURKA,BRCA1,PSRC1,CCNF,CEP250,SKA1,TMEM67,CHEK1,PKD1,PLK1,XPO1,DCTN1,KIF11,RANBP1,HDAC6,DYNC1LI1,CKAP2,SKA3
GO: Biological Process	GO:0006325	chromatin organization		5.898e-09	4.414e-05	3.294e-07	3.128e-06	84	841	CHAF1B,MIS18BP1,CENPW,H2AZ2,FBL,SETD6,HJURP,JDP2,MCM2,ACTL6A,JADE1,TRRAP,NPM3,CDC45,CENPP,SCML2,MTA3,RBM14,TADA3,APBB1,PPHLN1,RUVBL1,SCMH1,TET1,CENPI,SMARCA2,MYC,SOX9,SOX15,ZMYND11,CENPN,ATRX,NAP1L1,NASP,CENPK,SAP30,AURKA,CDAN1,PSME4,BRCA1,MSL3,SATB2,KMT5C,MIS18A,WDR5,CCNA2,H2AX,H2AZ1,CDK1,AURKB,HELLS,CBX3,HMGB1,OIP5,HMGB2,HMGN1,CHEK1,ZNF462,CENPM,NUCKS1,PRMT2,PRMT1,PRMT7,SMYD3,VRK1,PAF1,ATF2,CEN…
GO: Biological Process	GO:0071173	spindle assembly checkpoint		6.201e-09	4.64e-05	3.412e-07	3.24e-06	14	40	USP44,NDC80,BIRC5,BUB1,BUB1B,CDC20,AURKB,CENPF,TRIP13,TTK,PLK1,CDT1,DYNC1LI1,MAD2L1
GO: Biological Process	GO:0007094	mitotic spindle assembly checkpoint		6.201e-09	4.64e-05	3.412e-07	3.24e-06	14	40	USP44,NDC80,BIRC5,BUB1,BUB1B,CDC20,AURKB,CENPF,TRIP13,TTK,PLK1,CDT1,DYNC1LI1,MAD2L1
GO: Biological Process	GO:0000727	double-strand break repair via break-induced replication		7.384e-09	5.525e-05	4.033e-07	3.83e-06	8	11	MCM2,MCM3,MCM5,MCM6,MCM7,CDC45,GINS4,GINS2
GO: Biological Process	GO:0043486	histone exchange		7.836e-09	5.864e-05	4.249e-07	4.036e-06	17	61	MIS18BP1,CENPW,HJURP,CENPP,RUVBL1,CENPI,CENPN,NASP,CENPK,PSME4,MIS18A,OIP5,CENPM,CENPH,PTMA,ANP32E,CENPU
GO: Biological Process	GO:0045005	DNA-dependent DNA replication maintenance of fidelity		8.968e-09	6.711e-05	4.828e-07	4.585e-06	14	41	ZRANB3,MRE11,FANCM,ATRX,TONSL,PCNA,NUCKS1,BOD1L1,POLD1,EME1,DNA2,RAD51,MMS22L,ALYREF
GO: Biological Process	GO:0048193	Golgi vesicle transport		9.133e-09	6.834e-05	4.862e-07	4.618e-06	78	766	TBC1D19,RAB19,KIF18A,IFT43,TTC26,TBC1D24,TUBB4B,RACK1,ZMYND10,FAM161A,FAM92A,NME5,CC2D2A,IFT80,RSPH9,FLNA,IFT74,IFT81,TUBB,NBEA,STIL,ARF5,WDR19,LRRC46,HAUS1,GALNT11,CEP70,CEP152,PLK4,SORL1,STK36,CLUAP1,CENPJ,SPTBN1,TOGARAM1,HYLS1,KIF2C,RPGRIP1L,ARHGAP35,ODF2,B9D2,RABL2B,CEP250,CDK1,DCTN3,EXOC4,TMEM67,CTSC,CBY1,SNX8,PLK1,RAB26,KIF23,IFT22,SEC31B,GCC2,CCP110,HAUS6,NDE1,KIAA0586,KIF4A,SFI1,DCTN1,KIF…
GO: Biological Process	GO:1901988	negative regulation of cell cycle phase transition		9.161e-09	6.855e-05	4.862e-07	4.618e-06	40	284	JADE1,USP44,NDC80,MRE11,TICRR,GTSE1,DTL,BIRC5,CLSPN,SOX4,AURKA,PSME4,BRCA1,BUB1,BUB1B,CCNG1,CDK1,CDC6,CDC20,PCNA,AURKB,CDKN2C,CENPF,CHEK1,FOXN3,TRIP13,TTK,FBXO7,PRMT2,PRMT1,PLK1,PRKDC,PSMA2,PSMD3,FBXO5,PINX1,CDT1,E2F1,DYNC1LI1,MAD2L1
GO: Biological Process	GO:0022616	DNA strand elongation		9.388e-09	7.025e-05	4.947e-07	4.699e-06	11	24	MCM3,MCM7,MRE11,GINS4,GINS2,PCNA,NUCKS1,GINS1,DNA2,RFC4,LIG1
GO: Biological Process	GO:0001207	histone displacement		1.028e-08	7.691e-05	5.378e-07	5.108e-06	17	62	MIS18BP1,CENPW,HJURP,CENPP,RUVBL1,CENPI,CENPN,NASP,CENPK,PSME4,MIS18A,OIP5,CENPM,CENPH,PTMA,ANP32E,CENPU
GO: Biological Process	GO:0031055	chromatin remodeling at centromere		1.058e-08	7.914e-05	5.496e-07	5.22e-06	15	48	MIS18BP1,CENPW,HJURP,CENPP,RUVBL1,CENPI,CENPN,NASP,CENPK,MIS18A,HELLS,OIP5,CENPM,CENPH,CENPU
GO: Biological Process	GO:0034508	centromere complex assembly		1.455e-08	0.0001089	7.51e-07	7.133e-06	16	56	MIS18BP1,CENPW,HJURP,CENPP,RUVBL1,CENPI,CENPN,NASP,CENPK,MIS18A,HELLS,CENPF,OIP5,CENPM,CENPH,CENPU
GO: Biological Process	GO:0031570	DNA integrity checkpoint		2.487e-08	0.0001861	1.269e-06	1.206e-05	28	164	BRIP1,CDC45,CUL4A,MRE11,TICRR,GTSE1,DTL,MSH2,CLSPN,SOX4,AURKA,BRCA1,CCNG1,H2AX,CDK1,CDC6,TOP2A,PCNA,CHEK1,FOXN3,PRMT1,PLK1,ATF2,PRKDC,EME1,CDT1,DNA2,E2F1
GO: Biological Process	GO:0034080	CENP-A containing nucleosome assembly		2.527e-08	0.0001891	1.269e-06	1.206e-05	14	44	MIS18BP1,CENPW,HJURP,CENPP,RUVBL1,CENPI,CENPN,NASP,CENPK,MIS18A,OIP5,CENPM,CENPH,CENPU
GO: Biological Process	GO:0061641	CENP-A containing chromatin organization		2.527e-08	0.0001891	1.269e-06	1.206e-05	14	44	MIS18BP1,CENPW,HJURP,CENPP,RUVBL1,CENPI,CENPN,NASP,CENPK,MIS18A,OIP5,CENPM,CENPH,CENPU
GO: Biological Process	GO:0061644	protein localization to CENP-A containing chromatin		2.527e-08	0.0001891	1.269e-06	1.206e-05	14	44	MIS18BP1,CENPW,HJURP,CENPP,RUVBL1,CENPI,CENPN,NASP,CENPK,MIS18A,OIP5,CENPM,CENPH,CENPU
GO: Biological Process	GO:0006338	chromatin remodeling		2.691e-08	0.0002014	1.343e-06	1.275e-05	30	185	MIS18BP1,CENPW,HJURP,ACTL6A,NPM3,CENPP,RUVBL1,SCMH1,CENPI,SMARCA2,MYC,SOX9,CENPN,ATRX,NASP,CENPK,PSME4,SATB2,MIS18A,HELLS,CBX3,HMGB1,OIP5,HMGB2,CENPM,CENPH,PTMA,JARID2,ANP32E,CENPU
GO: Biological Process	GO:0034655	nucleobase-containing compound catabolic process		4.14e-08	0.0003098	2.051e-06	1.948e-05	61	562	RIDA,RPL34,RPL36A,ACAT1,RPS2,RBM10,RPS7,RPS10,NAF1,FEN1,XRN2,RNASEH2A,APEX1,KHSRP,NUDT1,MTOR,HNRNPM,SSB,PSME4,POP1,TNRC6A,YBX1,NTHL1,LARP1,OGG1,GSPT1,LSM6,PCNA,PDE4A,PDE7A,HMGB1,EXOSC8,HMGB2,LSM5,GSPT2,HPRT1,DCTPP1,XPO1,IL6,SERBP1,EIF4A3,PSMA2,PSMD3,ITPA,DHX9,DFFA,ENPP5,DNA2,PYCR3,DUT,E2F1,RPSA,LIN28A,LIG1,LRPPRC,TOB1,MRTO4,NUDT15,RPL7,RPL8,RPL17
GO: Biological Process	GO:0032201	telomere maintenance via semi-conservative replication		4.245e-08	0.0003177	2.09e-06	1.985e-05	11	27	FEN1,PCNA,POLA2,POLD1,POLE2,PRIM1,PRIM2,DNA2,RFC4,RFC5,RPA3
GO: Biological Process	GO:0006271	DNA strand elongation involved in DNA replication		4.418e-08	0.0003306	2.147e-06	2.039e-05	9	17	MCM3,MCM7,GINS4,GINS2,PCNA,GINS1,DNA2,RFC4,LIG1
GO: Biological Process	GO:0090592	DNA synthesis involved in DNA replication		4.418e-08	0.0003306	2.147e-06	2.039e-05	9	17	MCM3,MCM7,GINS4,GINS2,PCNA,GINS1,DNA2,RFC4,LIG1
GO: Biological Process	GO:0044270	cellular nitrogen compound catabolic process		4.625e-08	0.0003461	2.233e-06	2.121e-05	65	617	RIDA,RPL34,RPL36A,ACAT1,RPS2,RBM10,RPS7,RPS10,AFMID,NAF1,FEN1,XRN2,RNASEH2A,APEX1,KHSRP,NUDT1,MTOR,TET1,HNRNPM,SSB,PSME4,POP1,TNRC6A,YBX1,NTHL1,LARP1,OGG1,GSPT1,LSM6,CARNMT1,PCNA,PDE4A,PDE7A,HMGB1,EXOSC8,HMGB2,TST,LSM5,GSPT2,HPRT1,DCTPP1,XPO1,IL6,SERBP1,EIF4A3,PSMA2,PSMD3,ITPA,DHX9,DFFA,ENPP5,DNA2,PYCR3,DUT,E2F1,RPSA,LIN28A,LIG1,LRPPRC,TOB1,MRTO4,NUDT15,RPL7,RPL8,RPL17
GO: Biological Process	GO:0006336	DNA replication-independent nucleosome assembly		6.243e-08	0.0004672	2.995e-06	2.844e-05	15	54	MIS18BP1,CENPW,HJURP,CENPP,RUVBL1,CENPI,CENPN,ATRX,NASP,CENPK,MIS18A,OIP5,CENPM,CENPH,CENPU
GO: Biological Process	GO:0010639	negative regulation of organelle organization		6.908e-08	0.0005169	3.292e-06	3.127e-05	51	440	ERCC1,MCM2,ADD3,USP44,DLC1,NDC80,RBM14,FGFR2,CAMSAP1,ARFGEF1,BIRC5,SHROOM2,TET1,ATRX,SPTBN1,BRCA1,BUB1,BUB1B,CCNF,TMSB4X,CDC20,TOP2A,AURKB,TMEM67,PTTG1,CENPF,TWF2,CHEK1,PFN1,TRIP13,TTK,HNRNPA1,RECQL4,PLK1,XRCC5,PRKAR1A,ESPL1,CCP110,MYADM,ACD,BCOR,JARID2,FBXO5,PINX1,CDT1,DNMT3B,ESPN,HDAC6,DYNC1LI1,CKAP2,MAD2L1
GO: Biological Process	GO:0034724	DNA replication-independent nucleosome organization		8.175e-08	0.0006117	3.872e-06	3.677e-05	15	55	MIS18BP1,CENPW,HJURP,CENPP,RUVBL1,CENPI,CENPN,ATRX,NASP,CENPK,MIS18A,OIP5,CENPM,CENPH,CENPU
GO: Biological Process	GO:0032886	regulation of microtubule-based process		9.195e-08	0.000688	4.327e-06	4.11e-05	34	239	KIF18A,MAP9,SMC1A,RBM14,FES,TACC3,CAMSAP1,STIL,SPAG5,ARL2,TPX2,CEP70,PLK4,CENPJ,TOGARAM1,AURKA,BRCA1,PSRC1,CCNF,CEP250,SKA1,TMEM67,CHEK1,PKD1,PLK1,XPO1,DCTN1,KIF11,CCDC40,RANBP1,HDAC6,DYNC1LI1,CKAP2,SKA3
GO: Biological Process	GO:0046700	heterocycle catabolic process		9.811e-08	0.0007342	4.589e-06	4.358e-05	64	616	RIDA,RPL34,RPL36A,ACAT1,RPS2,RBM10,RPS7,RPS10,AFMID,NAF1,FEN1,XRN2,RNASEH2A,APEX1,KHSRP,NUDT1,MTOR,TET1,HNRNPM,SSB,PSME4,POP1,TNRC6A,YBX1,NTHL1,LARP1,OGG1,GSPT1,LSM6,CARNMT1,PCNA,PDE4A,PDE7A,HMGB1,EXOSC8,HMGB2,LSM5,GSPT2,HPRT1,DCTPP1,XPO1,IL6,SERBP1,EIF4A3,PSMA2,PSMD3,ITPA,DHX9,DFFA,ENPP5,DNA2,PYCR3,DUT,E2F1,RPSA,LIN28A,LIG1,LRPPRC,TOB1,MRTO4,NUDT15,RPL7,RPL8,RPL17
GO: Biological Process	GO:1901989	positive regulation of cell cycle phase transition		1.145e-07	0.0008571	5.324e-06	5.056e-05	22	116	ATAD5,CDC45,MTA3,CUL4A,DTL,APEX1,BIRC5,CDCA5,DBF4,UBE2C,CDK1,CDC6,CDC25A,ANAPC4,PAF1,ESPL1,DLGAP5,FBXO5,FAM83D,CDT1,LMNB1,RPL17
GO: Biological Process	GO:0043044	ATP-dependent chromatin remodeling		1.183e-07	0.0008849	5.441e-06	5.167e-05	19	89	MIS18BP1,CENPW,HJURP,ACTL6A,CENPP,RUVBL1,CENPI,SMARCA2,CENPN,NASP,CENPK,PSME4,MIS18A,OIP5,CENPM,CENPH,PTMA,ANP32E,CENPU
GO: Biological Process	GO:1903046	meiotic cell cycle process		1.2e-07	0.0008977	5.441e-06	5.167e-05	37	276	KIF18A,ERCC1,BRIP1,SMC1A,FANCD2,RMI1,RAD54L,MRE11,SMC2,FANCM,NDC1,ATRX,AURKA,BUB1,BUB1B,NCAPD3,NCAPH,EXO1,H2AX,CDC20,CDC25A,TOP2A,PTTG1,TRIP13,TTK,CKS2,RAD54B,PLK1,XRCC5,PRKAR1A,ESPL1,EME1,NUF2,NSUN2,FBXO5,SGO2,RAD51
GO: Biological Process	GO:0051321	meiotic cell cycle		1.2e-07	0.0008977	5.441e-06	5.167e-05	37	276	KIF18A,ERCC1,BRIP1,SMC1A,FANCD2,RMI1,RAD54L,MRE11,SMC2,FANCM,NDC1,ATRX,AURKA,BUB1,BUB1B,NCAPD3,NCAPH,EXO1,H2AX,CDC20,CDC25A,TOP2A,PTTG1,TRIP13,TTK,CKS2,RAD54B,PLK1,XRCC5,PRKAR1A,ESPL1,EME1,NUF2,NSUN2,FBXO5,SGO2,RAD51
GO: Biological Process	GO:0140013	meiotic nuclear division		1.2e-07	0.0008977	5.441e-06	5.167e-05	37	276	KIF18A,ERCC1,BRIP1,SMC1A,FANCD2,RMI1,RAD54L,MRE11,SMC2,FANCM,NDC1,ATRX,AURKA,BUB1,BUB1B,NCAPD3,NCAPH,EXO1,H2AX,CDC20,CDC25A,TOP2A,PTTG1,TRIP13,TTK,CKS2,RAD54B,PLK1,XRCC5,PRKAR1A,ESPL1,EME1,NUF2,NSUN2,FBXO5,SGO2,RAD51
GO: Biological Process	GO:1901293	nucleoside phosphate biosynthetic process		1.579e-07	0.001182	7.119e-06	6.761e-05	49	426	ERH,ACAT1,SCD5,AFMID,MTCO2P12,ADSL,NME5,SHMT1,MAGI3,MSH2,APRT,PAICS,GADD45GIP1,MTHFD1,CARD11,ATIC,ATP5F1D,MYC,ATP5MC1,ATP5MC3,ATP7A,ATP5PO,GARS1,LHPP,NDUFA4,NDUFA9,SUCLG1,NDUFB3,NDUFS6,ACSF3,NME2,UQCR11,CAD,CBR4,TAMM41,TK1,CYCS,TMSB4X,CDK1,PFAS,HPRT1,PKM,ELOVL6,SLC25A23,COX6C,IMPDH2,DTYMK,DUT,ENO1
GO: Biological Process	GO:0043009	chordate embryonic development		1.657e-07	0.00124	7.423e-06	7.05e-05	77	806	ERCC2,USP9X,RPS7,ACTL6A,MDFI,FZD1,DLC1,EMG1,CC2D2A,FGFR2,CUL4A,SRSF1,ANGPT1,FLVCR1,PHF6,SLC34A2,GINS4,G2E3,MSH2,STIL,WDR19,SPINT2,MTHFD1,TET1,ATP1B1,SUFU,PLK4,SOX4,SOX9,CLUAP1,ATP7A,NASP,SIX4,BMPR1A,BRCA1,GPI,SATB2,TCF7,RPGRIP1L,TCOF1,YBX1,TEAD4,ARHGAP35,TJP1,CCNB2,CHEK1,PFN1,HOXB4,ZNF358,PKD1,NLE1,PRMT1,PLCG1,CELSR1,ZIC5,RBPJ,UBR3,PRKDC,PCGF2,EIF4A3,PSPH,BCOR,NSUN2,NCAPG2,GINS1,CCM2,TMEM231,TCTN…
GO: Biological Process	GO:0045132	meiotic chromosome segregation		1.729e-07	0.001294	7.701e-06	7.314e-05	20	100	BRIP1,FANCD2,RMI1,MRE11,SMC2,FANCM,NDC1,BUB1,BUB1B,NCAPD3,NCAPH,TOP2A,PTTG1,TRIP13,TTK,PLK1,ESPL1,EME1,NUF2,SGO2
GO: Biological Process	GO:0031497	chromatin assembly		1.807e-07	0.001352	7.999e-06	7.597e-05	27	169	CHAF1B,MIS18BP1,CENPW,HJURP,MCM2,CENPP,RUVBL1,CENPI,SMARCA2,SOX9,CENPN,ATRX,NAP1L1,NASP,CENPK,CDAN1,MIS18A,H2AX,HELLS,HMGB1,OIP5,HMGB2,CENPM,SMYD3,PAF1,CENPH,CENPU
GO: Biological Process	GO:0007062	sister chromatid cohesion		1.831e-07	0.00137	8.058e-06	7.654e-05	16	66	SMC1A,FEN1,MRE11,CDCA5,ATRX,BUB1,BUB1B,CDC20,PTTG1,RECQL4,DSCC1,PLK1,ESPL1,SGO2,KIF22,ESCO2
GO: Biological Process	GO:1901361	organic cyclic compound catabolic process		1.846e-07	0.001382	8.079e-06	7.673e-05	67	668	RIDA,RPL34,RPL36A,ACAT1,RPS2,RBM10,RPS7,RPS10,AFMID,NAF1,FEN1,XRN2,RNASEH2A,APEX1,KHSRP,NUDT1,MTOR,TET1,SRD5A1,HNRNPM,SSB,PSME4,POP1,TNRC6A,YBX1,NTHL1,LARP1,OGG1,GSPT1,LSM6,CARNMT1,PCNA,PDE4A,PDE7A,HMGB1,EXOSC8,HMGB2,LSM5,GSPT2,HPRT1,DCTPP1,XPO1,YWHAH,IL6,SERBP1,EIF4A3,PSMA2,PSMD3,ITPA,DHX9,DFFA,ENPP5,DNA2,PYCR3,DUT,E2F1,RPSA,LIN28A,LIG1,LRPPRC,TOB1,MRTO4,HSD17B11,NUDT15,RPL7,RPL8,RPL17
GO: Biological Process	GO:0019439	aromatic compound catabolic process		1.976e-07	0.001479	8.598e-06	8.166e-05	64	628	RIDA,RPL34,RPL36A,ACAT1,RPS2,RBM10,RPS7,RPS10,AFMID,NAF1,FEN1,XRN2,RNASEH2A,APEX1,KHSRP,NUDT1,MTOR,TET1,HNRNPM,SSB,PSME4,POP1,TNRC6A,YBX1,NTHL1,LARP1,OGG1,GSPT1,LSM6,CARNMT1,PCNA,PDE4A,PDE7A,HMGB1,EXOSC8,HMGB2,LSM5,GSPT2,HPRT1,DCTPP1,XPO1,IL6,SERBP1,EIF4A3,PSMA2,PSMD3,ITPA,DHX9,DFFA,ENPP5,DNA2,PYCR3,DUT,E2F1,RPSA,LIN28A,LIG1,LRPPRC,TOB1,MRTO4,NUDT15,RPL7,RPL8,RPL17
GO: Biological Process	GO:0006753	nucleoside phosphate metabolic process		2.592e-07	0.001939	1.121e-05	0.0001065	69	702	ERH,NUP85,ACAT1,SCD5,AFMID,MTCO2P12,ADSL,NME5,MPI,SHMT1,MAGI3,MSH2,APRT,PAICS,GADD45GIP1,NUP35,NDC1,NUDT1,MTHFD1,CARD11,ATIC,ATP5F1D,MYC,ATP5MC1,ATP5MC3,ATP7A,ATP5PO,GAPDH,GARS1,LHPP,NDUFA4,NDUFA9,SUCLG1,NDUFB3,NDUFS6,NUP205,ACSF3,NME2,UQCR11,GPI,CAD,NTHL1,OGG1,CBR4,TAMM41,TK1,CYCS,TMSB4X,CDK1,PDE4A,PDE7A,PFAS,PGAM1,HPRT1,PKM,ELOVL6,DCTPP1,SLC25A23,COX6C,IMPDH2,ITPA,ENPP5,RAN,DTYMK,DUT,LDHA,EHHAD…
GO: Biological Process	GO:0009141	nucleoside triphosphate metabolic process		3.495e-07	0.002615	1.503e-05	0.0001427	33	241	MTCO2P12,NME5,MSH2,GADD45GIP1,NUDT1,ATP5F1D,MYC,ATP5MC1,ATP5MC3,ATP7A,ATP5PO,NDUFA4,NDUFA9,SUCLG1,NDUFB3,NDUFS6,NME2,UQCR11,CAD,CYCS,TMSB4X,CDK1,PKM,DCTPP1,SLC25A23,COX6C,IMPDH2,ITPA,RAN,DTYMK,DUT,NUDT15,ENO1
GO: Biological Process	GO:0009117	nucleotide metabolic process		3.558e-07	0.002662	1.521e-05	0.0001445	68	694	ERH,NUP85,ACAT1,SCD5,AFMID,MTCO2P12,ADSL,NME5,MPI,SHMT1,MAGI3,MSH2,APRT,PAICS,GADD45GIP1,NUP35,NDC1,NUDT1,MTHFD1,CARD11,ATIC,ATP5F1D,MYC,ATP5MC1,ATP5MC3,ATP7A,ATP5PO,GAPDH,GARS1,NDUFA4,NDUFA9,SUCLG1,NDUFB3,NDUFS6,NUP205,ACSF3,NME2,UQCR11,GPI,CAD,NTHL1,OGG1,CBR4,TAMM41,TK1,CYCS,TMSB4X,CDK1,PDE4A,PDE7A,PFAS,PGAM1,HPRT1,PKM,ELOVL6,DCTPP1,SLC25A23,COX6C,IMPDH2,ITPA,ENPP5,RAN,DTYMK,DUT,LDHA,EHHADH,NUD…
GO: Biological Process	GO:0046605	regulation of centrosome cycle		3.615e-07	0.002705	1.537e-05	0.000146	15	61	MAP9,RBM14,STIL,PLK4,CENPJ,AURKA,BRCA1,CCNF,CEP250,TMEM67,CHEK1,XPO1,KIF11,RANBP1,DYNC1LI1
GO: Biological Process	GO:0051383	kinetochore organization		4.422e-07	0.003309	1.869e-05	0.0001776	9	21	CENPW,NDC80,SMC2,CENPN,CENPK,CENPF,CENPH,NUF2,CDT1
GO: Biological Process	GO:0009792	embryo development ending in birth or egg hatching		5.086e-07	0.003806	2.138e-05	0.0002031	77	829	ERCC2,USP9X,RPS7,ACTL6A,MDFI,FZD1,DLC1,EMG1,CC2D2A,FGFR2,CUL4A,SRSF1,ANGPT1,FLVCR1,PHF6,SLC34A2,GINS4,G2E3,MSH2,STIL,WDR19,SPINT2,MTHFD1,TET1,ATP1B1,SUFU,PLK4,SOX4,SOX9,CLUAP1,ATP7A,NASP,SIX4,BMPR1A,BRCA1,GPI,SATB2,TCF7,RPGRIP1L,TCOF1,YBX1,TEAD4,ARHGAP35,TJP1,CCNB2,CHEK1,PFN1,HOXB4,ZNF358,PKD1,NLE1,PRMT1,PLCG1,CELSR1,ZIC5,RBPJ,UBR3,PRKDC,PCGF2,EIF4A3,PSPH,BCOR,NSUN2,NCAPG2,GINS1,CCM2,TMEM231,TCTN…
GO: Biological Process	GO:0042273	ribosomal large subunit biogenesis		5.364e-07	0.004014	2.243e-05	0.000213	16	71	RPF2,NOP16,WDR12,MDN1,DDX18,BOP1,EBNA1BP2,PPAN,NLE1,MRPL11,MRPL1,URB1,PAK1IP1,HEATR3,MRTO4,RPL7
GO: Biological Process	GO:0010638	positive regulation of organelle organization		5.713e-07	0.004275	2.375e-05	0.0002256	66	675	NUSAP1,ERCC1,JDP2,F2RL1,ZMYND10,NAF1,FEN1,FES,AKT2,MRE11,FLNA,PPM1E,BIRC5,CCT7,PPHLN1,SPAG5,PDLIM4,MSN,ARL2,CCT5,MTOR,TET1,CDCA5,PLK4,CENPJ,ATRX,TOGARAM1,BIK,AURKA,BRCA1,MLLT11,YWHAQ,PSRC1,UBE2C,ARHGAP35,DDHD1,AURKB,TMEM67,PFN1,HNRNPA1,HNRNPA2B1,FBXO7,ANAPC4,PAF1,XRCC5,YWHAH,ARHGEF10,ESPL1,CCP110,ACD,DLGAP5,DCTN1,JARID2,FBXO5,SGO2,CDT1,GNL3,DNMT3B,RANBP1,HDAC6,E2F1,HUWE1,G3BP1,ABI2,TRIM28,LRP5
GO: Biological Process	GO:0009165	nucleotide biosynthetic process		7.693e-07	0.005757	3.181e-05	0.0003021	47	423	ERH,ACAT1,SCD5,AFMID,MTCO2P12,ADSL,NME5,SHMT1,MAGI3,MSH2,APRT,PAICS,GADD45GIP1,MTHFD1,CARD11,ATIC,ATP5F1D,MYC,ATP5MC1,ATP5MC3,ATP7A,ATP5PO,GARS1,NDUFA4,NDUFA9,NDUFB3,NDUFS6,ACSF3,NME2,UQCR11,CAD,CBR4,TAMM41,TK1,CYCS,TMSB4X,CDK1,PFAS,HPRT1,PKM,ELOVL6,SLC25A23,COX6C,IMPDH2,DTYMK,DUT,ENO1
GO: Biological Process	GO:0044848	biological phase		7.831e-07	0.00586	3.22e-05	0.0003058	25	160	BRIP1,FANCD2,RMI1,RAD54L,MRE11,FERMT1,FANCM,NDC1,AURKA,CDC20,CDH3,TOP2A,PTTG1,TRIP13,TTK,CKS2,RAD54B,PLK1,XRCC5,ESPL1,CTSV,EME1,FBXO5,SGO2,RAD51
GO: Biological Process	GO:1901992	positive regulation of mitotic cell cycle phase transition		8.033e-07	0.006011	3.285e-05	0.000312	19	100	CDC45,MTA3,CUL4A,DTL,APEX1,BIRC5,CDCA5,DBF4,UBE2C,CDK1,CDC6,CDC25A,ANAPC4,ESPL1,DLGAP5,FBXO5,CDT1,LMNB1,RPL17
GO: Biological Process	GO:0051303	establishment of chromosome localization		8.431e-07	0.006309	3.429e-05	0.0003257	17	82	KIF18A,NDC80,BIRC5,SPAG5,CDCA5,PSRC1,KIF2C,CENPF,NDE1,DLGAP5,NUF2,PINX1,FAM83D,CDT1,KIFC1,KIF22,CDCA8
GO: Biological Process	GO:0043604	amide biosynthetic process		9.368e-07	0.00701	3.789e-05	0.0003599	83	930	MRPL23,RIDA,MTG1,RPL34,RPL36A,ACAT1,RPS2,RPS7,RPS10,SCD5,RPL39L,MCTS2P,RACK1,MRPS17,AKT2,RPL22L1,TICRR,MRPL13,SHMT1,MRPL28,DEGS1,GADD45GIP1,KHSRP,MTHFD1,MTOR,CNDP2,EIF3B,ATIC,SOX4,GAPDH,CHAC2,GARS1,NARS1,METAP1,ST3GAL5,CDC123,TNRC6A,C1QBP,ACSF3,MARS2,TCOF1,LARP1,GSPT1,CBR4,TIA1,PA2G4,GATB,GSPT2,ELOVL6,PUS7,AKAP6,GEMIN5,MRPS26,MRPS9,MRPL36,MRPL11,MRPL1,IL6,SPTSSA,ILF3,EARS2,EIF4A3,BDH2,DARS1,DHX33…
GO: Biological Process	GO:0009790	embryo development		9.908e-07	0.007414	3.986e-05	0.0003786	105	1263	ERCC1,ERCC2,ABR,USP9X,RPS7,ACTL6A,MDFI,FZD1,DLC1,RACK1,EMG1,CC2D2A,POLR1B,FGFR2,CUL4A,SRSF1,ANGPT1,FLVCR1,PHF6,SLC34A2,GINS4,BIRC5,G2E3,MSH2,STIL,WDR19,SPINT2,MTHFD1,TET1,ATP1B1,SUFU,PLK4,SOD1,MYC,SOX4,SOX9,CLUAP1,ATP7A,NASP,SIX4,BMPR1A,BRCA1,LOXL3,GTPBP3,GPI,SATB2,TCF7,RPGRIP1L,TCOF1,YBX1,TEAD4,ARHGAP35,GRSF1,TJP1,CCNB2,CDK1,TOP2A,EXOC4,CHEK1,PFN1,CKS1B,CKS2,HOXB4,ZNF358,PKD1,NLE1,PRMT1,PLCG1,PA…
GO: Biological Process	GO:0050000	chromosome localization		1.01e-06	0.007555	4.04e-05	0.0003837	17	83	KIF18A,NDC80,BIRC5,SPAG5,CDCA5,PSRC1,KIF2C,CENPF,NDE1,DLGAP5,NUF2,PINX1,FAM83D,CDT1,KIFC1,KIF22,CDCA8
GO: Biological Process	GO:0045931	positive regulation of mitotic cell cycle		1.027e-06	0.007686	4.088e-05	0.0003883	27	184	NUSAP1,CDC45,MTA3,NDC80,CUL4A,DTL,APEX1,BIRC5,CDCA5,AURKA,DBF4,UBE2C,CDK1,CDC6,CDC25A,HMGB1,ANAPC4,ESPL1,DLGAP5,FBXO5,CDT1,RANBP1,LMNB1,DYNC1LI1,LRP5,MAD2L1,RPL17
GO: Biological Process	GO:0022406	membrane docking		1.144e-06	0.008563	4.53e-05	0.0004303	27	185	RABEPK,STX2,TUBB4B,CC2D2A,TUBB,MSN,HAUS1,CEP70,CEP152,PLK4,CENPJ,RPGRIP1L,ODF2,B9D2,CEP250,CDK1,DCTN3,EXOC4,TMEM67,MOSPD3,PLK1,CCP110,HAUS6,NDE1,SFI1,DCTN1,TCTN1
GO: Biological Process	GO:0044283	small molecule biosynthetic process		1.338e-06	0.01001	5.27e-05	0.0005006	71	763	ACAT1,MDH1,MDH2,SCD5,FABP5,NLN,NME5,SHMT1,APRT,DEGS1,SEPHS1,NUDT1,MTHFD1,ATIC,SOD1,PECR,GAPDH,BCAT1,NDUFA9,COQ2,BRCA1,GLUD1,ACSF3,NME2,GPI,CAD,ABHD2,NTHL1,OAT,WDR5,OGG1,CBS,CBR4,TK1,SLC35B4,PC,PCK2,PDE4A,PDE7A,PDSS1,PGAM1,HPRT1,PKM,PLCG1,ELOVL6,DCTPP1,CRABP2,SLC45A3,CBSL,CTH,PRKG1,IL6,IMPDH2,BDH2,PSPH,ITPA,COQ8A,DHCR24,DHFR,ALDH18A1,ENPP5,PYCR3,RAN,DTYMK,DUT,LBR,LDHA,LDHB,MECR,NUDT15,ENO1
GO: Biological Process	GO:0034728	nucleosome organization		1.416e-06	0.0106	5.546e-05	0.0005267	27	187	CHAF1B,MIS18BP1,CENPW,HJURP,MCM2,CENPP,RUVBL1,CENPI,SMARCA2,SOX9,CENPN,ATRX,NAP1L1,NASP,CENPK,PSME4,MIS18A,H2AX,OIP5,HMGB2,CENPM,SMYD3,PAF1,CENPH,PTMA,ANP32E,CENPU
GO: Biological Process	GO:0140056	organelle localization by membrane tethering		1.423e-06	0.01065	5.546e-05	0.0005267	26	176	RABEPK,STX2,TUBB4B,CC2D2A,TUBB,HAUS1,CEP70,CEP152,PLK4,CENPJ,RPGRIP1L,ODF2,B9D2,CEP250,CDK1,DCTN3,EXOC4,TMEM67,MOSPD3,PLK1,CCP110,HAUS6,NDE1,SFI1,DCTN1,TCTN1
GO: Biological Process	GO:0009124	nucleoside monophosphate biosynthetic process		1.623e-06	0.01214	6.292e-05	0.0005976	12	44	ADSL,SHMT1,APRT,PAICS,ATIC,LHPP,CAD,TK1,PFAS,HPRT1,IMPDH2,DUT
GO: Biological Process	GO:0022403	cell cycle phase		1.728e-06	0.01293	6.665e-05	0.000633	22	135	BRIP1,FANCD2,RMI1,RAD54L,MRE11,FANCM,NDC1,AURKA,CDC20,TOP2A,PTTG1,TRIP13,TTK,CKS2,RAD54B,PLK1,XRCC5,ESPL1,EME1,FBXO5,SGO2,RAD51
GO: Biological Process	GO:0006334	nucleosome assembly		2.09e-06	0.01564	8.02e-05	0.0007617	23	147	CHAF1B,MIS18BP1,CENPW,HJURP,MCM2,CENPP,RUVBL1,CENPI,SMARCA2,SOX9,CENPN,ATRX,NAP1L1,NASP,CENPK,MIS18A,H2AX,OIP5,HMGB2,CENPM,SMYD3,CENPH,CENPU
GO: Biological Process	GO:0009092	homoserine metabolic process		2.148e-06	0.01608	8.161e-05	0.0007751	5	6	MTHFD1,CBS,TST,CBSL,CTH
GO: Biological Process	GO:0019346	transsulfuration		2.148e-06	0.01608	8.161e-05	0.0007751	5	6	MTHFD1,CBS,TST,CBSL,CTH
GO: Biological Process	GO:0098762	meiotic cell cycle phase		2.322e-06	0.01737	8.73e-05	0.0008291	21	127	BRIP1,FANCD2,RMI1,RAD54L,MRE11,FANCM,NDC1,AURKA,TOP2A,PTTG1,TRIP13,TTK,CKS2,RAD54B,PLK1,XRCC5,ESPL1,EME1,FBXO5,SGO2,RAD51
GO: Biological Process	GO:0098764	meiosis I cell cycle phase		2.322e-06	0.01737	8.73e-05	0.0008291	21	127	BRIP1,FANCD2,RMI1,RAD54L,MRE11,FANCM,NDC1,AURKA,TOP2A,PTTG1,TRIP13,TTK,CKS2,RAD54B,PLK1,XRCC5,ESPL1,EME1,FBXO5,SGO2,RAD51
GO: Biological Process	GO:0043603	cellular amide metabolic process		2.337e-06	0.01749	8.744e-05	0.0008305	101	1225	MRPL23,RIDA,MTG1,RPL34,RPL36A,ACAT1,RPS2,RPS7,RPS10,SCD5,RPL39L,MCTS2P,NLN,RACK1,MRPS17,MIPEP,AKT2,RPL22L1,TICRR,SCG5,MRPL13,SHMT1,MRPL28,DEGS1,GADD45GIP1,KHSRP,MTHFD1,MTOR,CNDP2,EIF3B,ATIC,SOD1,SORL1,SOX4,GAPDH,CHAC2,GARS1,NARS1,SUCLG1,METAP1,ST3GAL5,CDC123,GLO1,TNRC6A,C1QBP,ACSF3,MARS2,TCOF1,LARP1,GSPT1,CBR4,TIA1,PA2G4,CARNMT1,PC,PCCB,DNPEP,GATB,PGAM1,GSPT2,ABCC2,ELOVL6,PUS7,AKAP6,CERK,GEMIN5,M…
GO: Biological Process	GO:0043043	peptide biosynthetic process		2.504e-06	0.01874	9.322e-05	0.0008853	72	791	MRPL23,RIDA,MTG1,RPL34,RPL36A,RPS2,RPS7,RPS10,RPL39L,MCTS2P,RACK1,MRPS17,AKT2,RPL22L1,TICRR,MRPL13,SHMT1,MRPL28,GADD45GIP1,KHSRP,MTOR,CNDP2,EIF3B,SOX4,GAPDH,CHAC2,GARS1,NARS1,METAP1,CDC123,TNRC6A,C1QBP,MARS2,TCOF1,LARP1,GSPT1,TIA1,PA2G4,GATB,GSPT2,PUS7,AKAP6,GEMIN5,MRPS26,MRPS9,MRPL36,MRPL11,MRPL1,IL6,ILF3,EARS2,EIF4A3,BDH2,DARS1,DHX33,DHX9,MRPL16,DHFR,FARSB,RPSA,LIN28A,DPH6,MRPL4,EEF1D,LRPPRC,TR…
GO: Biological Process	GO:0061982	meiosis I cell cycle process		2.643e-06	0.01978	9.744e-05	0.0009255	21	128	ERCC1,BRIP1,FANCD2,RMI1,RAD54L,MRE11,FANCM,NDC1,AURKA,CDC25A,TOP2A,PTTG1,TRIP13,CKS2,RAD54B,PLK1,ESPL1,EME1,FBXO5,SGO2,RAD51
GO: Biological Process	GO:0000279	M phase		2.643e-06	0.01978	9.744e-05	0.0009255	21	128	BRIP1,FANCD2,RMI1,RAD54L,MRE11,FANCM,NDC1,AURKA,CDC20,TOP2A,PTTG1,TRIP13,CKS2,RAD54B,PLK1,XRCC5,ESPL1,EME1,FBXO5,SGO2,RAD51
GO: Biological Process	GO:0051310	metaphase plate congression		2.664e-06	0.01993	9.756e-05	0.0009266	14	62	KIF18A,NDC80,SPAG5,CDCA5,PSRC1,KIF2C,CENPF,NUF2,PINX1,FAM83D,CDT1,KIFC1,KIF22,CDCA8
GO: Biological Process	GO:0006518	peptide metabolic process		2.673e-06	0.02	9.756e-05	0.0009266	82	940	MRPL23,RIDA,MTG1,RPL34,RPL36A,RPS2,RPS7,RPS10,RPL39L,MCTS2P,NLN,RACK1,MRPS17,MIPEP,AKT2,RPL22L1,TICRR,SCG5,MRPL13,SHMT1,MRPL28,GADD45GIP1,KHSRP,MTOR,CNDP2,EIF3B,SOD1,SORL1,SOX4,GAPDH,CHAC2,GARS1,NARS1,METAP1,CDC123,GLO1,TNRC6A,C1QBP,MARS2,TCOF1,LARP1,GSPT1,TIA1,PA2G4,CARNMT1,DNPEP,GATB,GSPT2,PUS7,AKAP6,GEMIN5,MRPS26,MRPS9,CTH,MRPL36,MRPL11,MRPL1,IL6,ILF3,EARS2,EIF4A3,BDH2,DARS1,DHX33,DHX9,MRPL16,…
GO: Biological Process	GO:0051169	nuclear transport		3.856e-06	0.02886	0.0001398	0.001328	42	382	NUP85,ANKRD54,FLNA,SRSF1,ANGPT1,SRSF7,GTSE1,FERMT1,NUP35,NDC1,SNRPB,SUFU,SNRPD1,SNRPF,SSB,NUP205,PSIP1,POLA2,HNRNPA1,HNRNPA2B1,TXN,PKD1,EI24,GEMIN5,XPO1,PPP1CC,THOC6,EIF4A3,ANKLE1,ENY2,DHX9,SLBP,HEATR3,KPNA2,KPNA3,IPO5,RAN,ECT2,TRIM28,ALYREF,EMD,DDX39A
GO: Biological Process	GO:0051225	spindle assembly		3.868e-06	0.02894	0.0001398	0.001328	21	131	MAP9,CENPW,SMC1A,FLNA,TUBB,BIRC5,SPAG5,HAUS1,TPX2,GOLGA8A,AURKA,CDC20,AURKB,PLK1,KIF23,ARHGEF10,HAUS6,KIF4A,FBXO5,KIF11,KIFC1
GO: Biological Process	GO:0006333	chromatin assembly or disassembly		3.906e-06	0.02923	0.0001405	0.001335	27	197	CHAF1B,MIS18BP1,CENPW,HJURP,MCM2,CENPP,RUVBL1,CENPI,SMARCA2,SOX9,CENPN,ATRX,NAP1L1,NASP,CENPK,CDAN1,MIS18A,H2AX,HELLS,HMGB1,OIP5,HMGB2,CENPM,SMYD3,PAF1,CENPH,CENPU
GO: Biological Process	GO:0030030	cell projection organization		3.952e-06	0.02957	0.0001415	0.001344	138	1828	TBC1D19,EPHB6,STX2,NUP85,USP9X,ETV1,F2RL1,TENM2,IFT43,TTC26,TBC1D24,FZD1,FZD4,TUBB4B,DLC1,ZMYND10,FAM161A,FAM92A,NME5,FES,FGD1,CC2D2A,LRRC7,SEMA6A,FGFR2,IFT80,CAMSAP1,RSPH9,FLNA,IFT74,IFT81,TUBB,APBB1,ARFGEF1,NLGN1,STIL,WDR19,ARHGAP4,LRRC46,HAUS1,TRIM32,MTOR,GALNT11,CEP70,CEP152,PLK4,SOD1,ATP5MC1,STK36,CLUAP1,ATP7A,CENPJ,MYO9A,SPTBN1,TOGARAM1,BLOC1S1,NCDN,AURKA,HYLS1,NME2,RPGRIP1L,CASP6,GRB10,RTN…
GO: Biological Process	GO:0006399	tRNA metabolic process		4.066e-06	0.03043	0.0001449	0.001376	26	186	OSGEP,SEPHS1,PUS1,DTD1,WDR4,GARS1,NARS1,SSB,POP1,GTPBP3,MARS2,TSEN2,GRSF1,LSM6,HSD17B10,GATB,EXOSC8,TSEN34,METTL2A,PUS7,PTCD1,EARS2,DARS1,NSUN2,TRDMT1,FARSB
GO: Biological Process	GO:0051130	positive regulation of cellular component organization		4.223e-06	0.0316	0.0001498	0.001422	108	1351	NUSAP1,ERCC1,ERCC2,JDP2,F2RL1,TENM2,TBC1D24,EHD2,FZD1,FZD4,RACK1,ZMYND10,NAF1,FEN1,FES,AKT2,LRRC7,CUL4A,MRE11,FLNA,ANGPT1,PPM1E,APBB1,BIRC5,CCT7,PPHLN1,NLGN1,SPAG5,PDLIM4,MSN,ARL2,CCT5,MTOR,TET1,CDCA5,PLK4,ATP5MC1,SOX9,ATP7A,CENPJ,ATRX,AXL,TOGARAM1,BIK,AURKA,BRCA1,C1QBP,MLLT11,YWHAQ,NME2,PSRC1,UBE2C,ICE1,ARHGAP35,DDHD1,SPIDR,CDC20,PARD3,AURKB,TMEM67,CORO1C,SERPINF1,ZMYND8,TWF2,PFN1,HNRNPA1,HNRNPA…
GO: Biological Process	GO:0055086	nucleobase-containing small molecule metabolic process		4.396e-06	0.03289	0.0001552	0.001474	71	789	ERH,NUP85,ACAT1,SCD5,AFMID,MTCO2P12,ADSL,NME5,MPI,SHMT1,MAGI3,MSH2,APRT,PAICS,GADD45GIP1,NUP35,NDC1,NUDT1,MTHFD1,MTOR,CARD11,ATIC,ATP5F1D,MYC,ATP5MC1,ATP5MC3,ATP7A,ATP5PO,GAPDH,GARS1,LHPP,NDUFA4,NDUFA9,SUCLG1,NDUFB3,NDUFS6,NUP205,ACSF3,NME2,UQCR11,GPI,CAD,NTHL1,OGG1,CBR4,TAMM41,TK1,CYCS,TMSB4X,CDK1,PDE4A,PDE7A,PFAS,PGAM1,HPRT1,PKM,ELOVL6,DCTPP1,SLC25A23,COX6C,IMPDH2,ITPA,ENPP5,PYCR3,RAN,DTYMK,DUT…
GO: Biological Process	GO:1902969	mitotic DNA replication		4.444e-06	0.03325	0.0001561	0.001483	7	15	MCM2,MCM3,MCM6,CDC45,GINS1,RAD51,LIG1
GO: Biological Process	GO:0051493	regulation of cytoskeleton organization		5.151e-06	0.03855	0.0001801	0.001711	56	577	KIF18A,MAP9,SMC1A,F2RL1,ADD3,DLC1,RBM14,FES,TACC3,CAMSAP1,FLNA,PPM1E,ARFGEF1,STIL,SHROOM2,SPAG5,PDLIM4,ARL2,MTOR,MYO1F,TPX2,CEP70,PLK4,CENPJ,SPTBN1,TOGARAM1,AURKA,BRCA1,PSRC1,ARHGAP35,CIT,CCNF,CEP250,TMSB4X,SKA1,TMEM67,TWF2,CHEK1,PFN1,PKD1,PLK1,XPO1,CELSR1,ARHGEF10,CTSV,MYADM,DCTN1,KIF11,ESPN,RANBP1,HDAC6,ECT2,ABI2,DYNC1LI1,CKAP2,SKA3
GO: Biological Process	GO:0006412	translation		5.31e-06	0.03973	0.0001839	0.001747	69	764	MRPL23,RIDA,MTG1,RPL34,RPL36A,RPS2,RPS7,RPS10,RPL39L,MCTS2P,RACK1,MRPS17,AKT2,RPL22L1,TICRR,MRPL13,SHMT1,MRPL28,GADD45GIP1,KHSRP,MTOR,EIF3B,SOX4,GAPDH,GARS1,NARS1,METAP1,CDC123,TNRC6A,C1QBP,MARS2,TCOF1,LARP1,GSPT1,TIA1,PA2G4,GATB,GSPT2,PUS7,AKAP6,GEMIN5,MRPS26,MRPS9,MRPL36,MRPL11,MRPL1,IL6,ILF3,EARS2,EIF4A3,DARS1,DHX33,DHX9,MRPL16,DHFR,FARSB,RPSA,LIN28A,DPH6,MRPL4,EEF1D,LRPPRC,TRAP1,TOB1,TRAM1L1,…
GO: Biological Process	GO:0006414	translational elongation		5.31e-06	0.03973	0.0001839	0.001747	69	764	MRPL23,RIDA,MTG1,RPL34,RPL36A,RPS2,RPS7,RPS10,RPL39L,MCTS2P,RACK1,MRPS17,AKT2,RPL22L1,TICRR,MRPL13,SHMT1,MRPL28,GADD45GIP1,KHSRP,MTOR,EIF3B,SOX4,GAPDH,GARS1,NARS1,METAP1,CDC123,TNRC6A,C1QBP,MARS2,TCOF1,LARP1,GSPT1,TIA1,PA2G4,GATB,GSPT2,PUS7,AKAP6,GEMIN5,MRPS26,MRPS9,MRPL36,MRPL11,MRPL1,IL6,ILF3,EARS2,EIF4A3,DARS1,DHX33,DHX9,MRPL16,DHFR,FARSB,RPSA,LIN28A,DPH6,MRPL4,EEF1D,LRPPRC,TRAP1,TOB1,TRAM1L1,…
GO: Biological Process	GO:0120036	plasma membrane bounded cell projection organization		5.365e-06	0.04015	0.0001842	0.00175	135	1790	TBC1D19,EPHB6,STX2,NUP85,USP9X,ETV1,F2RL1,TENM2,IFT43,TTC26,TBC1D24,FZD1,FZD4,TUBB4B,DLC1,ZMYND10,FAM161A,FAM92A,NME5,FES,FGD1,CC2D2A,LRRC7,SEMA6A,FGFR2,IFT80,CAMSAP1,RSPH9,FLNA,IFT74,IFT81,TUBB,APBB1,ARFGEF1,NLGN1,STIL,WDR19,ARHGAP4,LRRC46,HAUS1,TRIM32,MTOR,GALNT11,CEP70,CEP152,PLK4,SOD1,ATP5MC1,STK36,CLUAP1,ATP7A,CENPJ,MYO9A,SPTBN1,TOGARAM1,BLOC1S1,NCDN,AURKA,HYLS1,NME2,RPGRIP1L,CASP6,GRB10,RTN…
GO: Biological Process	GO:0090329	regulation of DNA-dependent DNA replication		5.367e-06	0.04016	0.0001842	0.00175	13	57	SMC1A,WDR18,ZRANB3,MRE11,TICRR,ATRX,DBF4,DSCC1,FBXO5,CDT1,RFC4,RFC5,GMNN
GO: Biological Process	GO:0009127	purine nucleoside monophosphate biosynthetic process		5.709e-06	0.04272	0.0001942	0.001844	8	21	ADSL,APRT,PAICS,ATIC,LHPP,PFAS,HPRT1,IMPDH2
GO: Biological Process	GO:0009168	purine ribonucleoside monophosphate biosynthetic process		5.709e-06	0.04272	0.0001942	0.001844	8	21	ADSL,APRT,PAICS,ATIC,LHPP,PFAS,HPRT1,IMPDH2
GO: Biological Process	GO:0019752	carboxylic acid metabolic process		5.802e-06	0.04342	0.0001965	0.001866	93	1127	RIDA,NUP85,ACAT1,MAT1A,MDH1,MDH2,SCD5,FABP5,AFMID,AKT2,MPI,ABCC1,SHMT1,DEGS1,NUP35,SLC6A6,SEPHS1,NDC1,MTHFD1,MTOR,ATIC,ALDH7A1,MYC,PECR,ATP7A,GAPDH,GARS1,NARS1,BCAT1,SUCLG1,NDUFS6,NUP205,BPHL,PSME4,BRCA1,GLDC,GLO1,GLUD1,ACSF3,GPI,MARS2,CAD,ABHD2,OAT,ODC1,SLC7A7,CBS,HPDL,FAAH2,CBR4,HSD17B10,CARNMT1,HADH,PC,PCCB,PCK2,GATB,PFAS,CYP2S1,HMMR,TST,PGAM1,CKB,PKM,ABCC2,ELOVL6,CRABP2,LPIN3,SLC45A3,CBSL,CTH…
GO: Biological Process	GO:0009123	nucleoside monophosphate metabolic process		5.908e-06	0.04421	0.0001991	0.001891	15	75	ADSL,SHMT1,MAGI3,APRT,PAICS,CARD11,ATIC,LHPP,CAD,TK1,PFAS,HPRT1,IMPDH2,DTYMK,DUT
GO: Biological Process	GO:0034404	nucleobase-containing small molecule biosynthetic process		6.17e-06	0.04617	0.0002071	0.001967	19	114	ACAT1,NME5,APRT,NUDT1,NME2,CAD,NTHL1,OGG1,TK1,PDE4A,PDE7A,HPRT1,DCTPP1,IMPDH2,ITPA,ENPP5,DTYMK,DUT,NUDT15
GO: Biological Process	GO:0006401	RNA catabolic process		6.659e-06	0.04983	0.0002225	0.002113	44	417	RIDA,RPL34,RPL36A,RPS2,RBM10,RPS7,RPS10,NAF1,FEN1,XRN2,RNASEH2A,APEX1,KHSRP,MTOR,HNRNPM,SSB,PSME4,POP1,TNRC6A,YBX1,LARP1,GSPT1,LSM6,PCNA,EXOSC8,LSM5,GSPT2,XPO1,SERBP1,EIF4A3,PSMA2,PSMD3,DHX9,DNA2,E2F1,RPSA,LIN28A,LIG1,LRPPRC,TOB1,MRTO4,RPL7,RPL8,RPL17
GO: Biological Process	GO:0000281	mitotic cytokinesis		7.011e-06	0.05246	0.0002329	0.002212	15	76	NUSAP1,MAP9,RTKN,BIRC5,SPTBN1,CIT,PLK1,KIF23,ESPL1,INCENP,KIF4A,CDT1,ECT2,KIF20A,CKAP2
GO: Biological Process	GO:1905515	non-motile cilium assembly		7.035e-06	0.05264	0.0002329	0.002212	14	67	CC2D2A,IFT80,IFT74,STIL,CENPJ,TOGARAM1,RPGRIP1L,CEP250,TMEM67,DCTN1,IFT57,DYNC2H1,IFT52,BBS7
GO: Biological Process	GO:1902299	pre-replicative complex assembly involved in cell cycle DNA replication		7.193e-06	0.05382	0.000235	0.002232	5	7	MCM2,MCM3,MCM5,MCM6,MCM7
GO: Biological Process	GO:0006267	pre-replicative complex assembly involved in nuclear cell cycle DNA replication		7.193e-06	0.05382	0.000235	0.002232	5	7	MCM2,MCM3,MCM5,MCM6,MCM7
GO: Biological Process	GO:0036388	pre-replicative complex assembly		7.193e-06	0.05382	0.000235	0.002232	5	7	MCM2,MCM3,MCM5,MCM6,MCM7
GO: Biological Process	GO:0072331	signal transduction by p53 class mediator		7.243e-06	0.0542	0.0002357	0.002238	33	276	BRIP1,ATAD5,SHISA5,RPS7,RMI1,RPF2,FOXM1,MRE11,MYBBP1A,GTSE1,MSH2,TPX2,SOX4,ATRX,SSRP1,AURKA,BRCA1,BOP1,EXO1,CDK1,PCNA,AURKB,CHEK1,PRMT1,RMI2,PAK1IP1,DNA2,E2F1,RFC4,RFC5,STEAP3,TAF15,RPA3
GO: Biological Process	GO:0006913	nucleocytoplasmic transport		7.463e-06	0.05584	0.0002417	0.002296	41	379	NUP85,ANKRD54,FLNA,SRSF1,ANGPT1,SRSF7,GTSE1,FERMT1,NUP35,NDC1,SNRPB,SUFU,SNRPD1,SNRPF,SSB,NUP205,POLA2,HNRNPA1,HNRNPA2B1,TXN,PKD1,EI24,GEMIN5,XPO1,PPP1CC,THOC6,EIF4A3,ANKLE1,ENY2,DHX9,SLBP,HEATR3,KPNA2,KPNA3,IPO5,RAN,ECT2,TRIM28,ALYREF,EMD,DDX39A
GO: Biological Process	GO:0006520	cellular amino acid metabolic process		7.529e-06	0.05634	0.0002428	0.002306	40	366	RIDA,ACAT1,MAT1A,AFMID,SHMT1,SLC6A6,SEPHS1,MTHFD1,ALDH7A1,ATP7A,GARS1,NARS1,BCAT1,BPHL,PSME4,GLDC,GLUD1,MARS2,CAD,OAT,ODC1,SLC7A7,CBS,HPDL,HSD17B10,CARNMT1,GATB,PFAS,TST,CBSL,CTH,EARS2,PSMA2,PSMD3,DARS1,PSPH,ALDH18A1,PYCR3,EGLN3,FARSB
GO: Biological Process	GO:0009144	purine nucleoside triphosphate metabolic process		7.722e-06	0.05779	0.000248	0.002356	28	216	MTCO2P12,NME5,MSH2,GADD45GIP1,NUDT1,ATP5F1D,MYC,ATP5MC1,ATP5MC3,ATP7A,ATP5PO,NDUFA4,NDUFA9,NDUFB3,NDUFS6,NME2,UQCR11,CYCS,TMSB4X,CDK1,PKM,SLC25A23,COX6C,IMPDH2,ITPA,RAN,NUDT15,ENO1
GO: Biological Process	GO:2001020	regulation of response to DNA damage stimulus		7.774e-06	0.05817	0.0002486	0.002361	29	228	ERCC1,ATAD5,FANCB,FOXM1,CUL4A,APBB1,RAD51AP1,TRIM32,FUS,MYC,BRCA1,NSMCE1,OGG1,DDIAS,H2AX,SPIDR,PCNA,HMGB1,CHEK1,AUNIP,RMI2,PRKDC,ANKLE1,DHX9,FBXO5,RAD51,WRAP53,TRIM28,STEAP3
GO: Biological Process	GO:2001252	positive regulation of chromosome organization		8.048e-06	0.06023	0.0002563	0.002434	26	193	ERCC1,JDP2,NAF1,FEN1,MRE11,CCT7,PPHLN1,CCT5,TET1,ATRX,BRCA1,AURKB,HNRNPA1,HNRNPA2B1,ANAPC4,PAF1,XRCC5,ESPL1,ACD,DLGAP5,JARID2,SGO2,CDT1,GNL3,DNMT3B,TRIM28
GO: Biological Process	GO:0044282	small molecule catabolic process		8.193e-06	0.06131	0.0002598	0.002467	47	461	RIDA,ACAT1,MAT1A,ADH5,AFMID,AKT2,MPI,SHMT1,NUDT1,MTOR,ALDH7A1,PECR,GAPDH,BCAT1,GLDC,GLO1,GLUD1,ACSF3,GPI,ABHD2,OAT,CBS,HSD17B10,CARNMT1,HADH,PCCB,PCK2,HMMR,TST,PGAM1,HPRT1,PKM,LPIN3,CTH,GALM,CYP26A1,BDH2,IRS1,DECR1,PYCR3,LDHA,MECR,EHHADH,LRP5,ECHDC2,NUDT15,ENO1
GO: Biological Process	GO:0006282	regulation of DNA repair		9.705e-06	0.07262	0.0003064	0.00291	20	128	FANCB,FOXM1,CUL4A,APBB1,RAD51AP1,FUS,BRCA1,OGG1,H2AX,SPIDR,PCNA,HMGB1,CHEK1,AUNIP,RMI2,PRKDC,DHX9,RAD51,WRAP53,TRIM28
GO: Biological Process	GO:0032206	positive regulation of telomere maintenance		1.081e-05	0.0809	0.0003399	0.003229	12	52	ERCC1,NAF1,MRE11,CCT7,CCT5,ATRX,AURKB,HNRNPA1,HNRNPA2B1,XRCC5,ACD,GNL3
GO: Biological Process	GO:0006284	base-excision repair		1.107e-05	0.0828	0.0003465	0.00329	11	44	FEN1,APEX1,NTHL1,OGG1,PCNA,HMGB1,POLD1,DNA2,HUWE1,LIG1,RPA3
GO: Biological Process	GO:0045934	negative regulation of nucleobase-containing compound metabolic process		1.12e-05	0.08383	0.0003493	0.003318	120	1573	ERCC1,USP9X,RBM10,JDP2,MDFI,TENM2,SNAI3,ZRANB3,CDC45,FZD1,FANCB,WWC2,MTA3,NAF1,AKT2,FGFR2,FOXM1,FLNA,MYBBP1A,SRSF7,NACC1,APBB1,PHF6,APEX1,BIRC5,PPHLN1,MSH2,LYAR,MTOR,SCMH1,TET1,SMARCA2,C11orf95,SUFU,MYC,SOX9,SOX15,ZMYND11,CENPJ,ATRX,SIX4,SAP30,BRCA1,RBMX,TONSL,MSL3,C1QBP,CBX1,LOXL3,YWHAQ,SATB2,TCF7,YBX1,LARP1,ARHGAP35,ZNF496,OGG1,ORC2,ZC3H10,PA2G4,ZNF431,PCNA,AURKB,HELLS,CENPF,ZMYND8,CBX3,HMGB1,H…
GO: Biological Process	GO:0016071	mRNA metabolic process		1.132e-05	0.08474	0.0003516	0.003339	77	901	RIDA,ZNF326,ERCC2,RPL34,RPL36A,RPS2,RBM10,RPS7,RPS10,TTF2,FLNA,XRN2,SRSF1,SRSF7,APEX1,KHSRP,SRRT,MTOR,FRG1,PUS1,FUS,SNRPA,SNRPB,SNRPD1,SNRPF,HNRNPM,SSB,TXNL4A,PSME4,RBMX,TNRC6A,C1QBP,CSTF2T,YBX1,LARP1,TSEN2,GRSF1,GSPT1,ZC3H10,LSM6,PSIP1,TIA1,EXOSC8,HNRNPA1,LSM5,HNRNPA2B1,GSPT2,TSEN34,PRMT7,WDR77,PUS7,POLR2L,GEMIN5,XPO1,PAF1,THOC6,SF3B5,SERBP1,EIF4A3,PSMA2,PSMD3,DHX9,SLBP,SNRNP25,HNRNPA3,E2F1,RPSA…
GO: Biological Process	GO:0006163	purine nucleotide metabolic process		1.225e-05	0.09166	0.0003773	0.003583	55	580	NUP85,ACAT1,SCD5,MTCO2P12,ADSL,NME5,MPI,MAGI3,MSH2,APRT,PAICS,GADD45GIP1,NUP35,NDC1,NUDT1,MTHFD1,CARD11,ATIC,ATP5F1D,MYC,ATP5MC1,ATP5MC3,ATP7A,ATP5PO,GAPDH,NDUFA4,NDUFA9,SUCLG1,NDUFB3,NDUFS6,NUP205,ACSF3,NME2,UQCR11,GPI,CBR4,CYCS,TMSB4X,CDK1,PDE4A,PDE7A,PFAS,PGAM1,HPRT1,PKM,ELOVL6,SLC25A23,COX6C,IMPDH2,ITPA,RAN,LDHA,EHHADH,NUDT15,ENO1
GO: Biological Process	GO:0009070	serine family amino acid biosynthetic process		1.225e-05	0.09168	0.0003773	0.003583	7	17	SHMT1,SEPHS1,MTHFD1,CBS,CBSL,CTH,PSPH
GO: Biological Process	GO:0000077	DNA damage checkpoint		1.255e-05	0.09388	0.0003848	0.003654	22	152	BRIP1,CUL4A,MRE11,GTSE1,DTL,MSH2,CLSPN,SOX4,AURKA,BRCA1,CCNG1,H2AX,CDK1,PCNA,CHEK1,FOXN3,PRMT1,PLK1,ATF2,PRKDC,EME1,E2F1
GO: Biological Process	GO:0009142	nucleoside triphosphate biosynthetic process		1.298e-05	0.09711	0.0003964	0.003765	27	210	MTCO2P12,NME5,MSH2,GADD45GIP1,ATP5F1D,MYC,ATP5MC1,ATP5MC3,ATP7A,ATP5PO,NDUFA4,NDUFA9,SUCLG1,NDUFB3,NDUFS6,NME2,UQCR11,CAD,CYCS,TMSB4X,CDK1,PKM,SLC25A23,COX6C,IMPDH2,DTYMK,ENO1
GO: Biological Process	GO:0036297	interstrand cross-link repair		1.332e-05	0.09968	0.0004052	0.003849	12	53	ERCC1,FANCD2,FANCB,FANCG,FANCM,RAD51AP1,UBE2T,MCM8,NUCKS1,EME1,RAD51,RPA3
GO: Biological Process	GO:0090307	mitotic spindle assembly		1.431e-05	0.1071	0.0004335	0.004117	13	62	MAP9,SMC1A,FLNA,BIRC5,TPX2,CDC20,AURKB,PLK1,KIF23,ARHGEF10,KIF4A,KIF11,KIFC1
GO: Biological Process	GO:0072522	purine-containing compound biosynthetic process		1.578e-05	0.1181	0.0004761	0.004522	37	338	ACAT1,SCD5,MTCO2P12,ADSL,NME5,SHMT1,MSH2,APRT,PAICS,GADD45GIP1,MTHFD1,ATIC,ATP5F1D,MYC,ATP5MC1,ATP5MC3,ATP7A,ATP5PO,NDUFA4,NDUFA9,NDUFB3,NDUFS6,ACSF3,NME2,UQCR11,CBR4,CYCS,TMSB4X,CDK1,PFAS,HPRT1,PKM,ELOVL6,SLC25A23,COX6C,IMPDH2,ENO1
GO: Biological Process	GO:0001701	in utero embryonic development		1.622e-05	0.1214	0.0004875	0.00463	50	515	ERCC2,USP9X,ACTL6A,MDFI,EMG1,FGFR2,CUL4A,SRSF1,ANGPT1,FLVCR1,PHF6,SLC34A2,GINS4,G2E3,MSH2,STIL,WDR19,SPINT2,TET1,ATP1B1,PLK4,ATP7A,NASP,BMPR1A,GPI,RPGRIP1L,YBX1,TEAD4,TJP1,CCNB2,CHEK1,PKD1,NLE1,PRMT1,PLCG1,RBPJ,UBR3,PCGF2,PSPH,BCOR,NSUN2,NCAPG2,GINS1,CCM2,TMEM231,TCTN1,DNAJB6,ZMIZ1,TRIM28,ENO1
GO: Biological Process	GO:0006403	RNA localization		1.644e-05	0.123	0.0004921	0.004673	29	237	NUP85,FBL,NAF1,SRSF1,SRSF7,CCT7,NUP35,KHSRP,NDC1,RUVBL1,CCT5,SSB,NUP205,CETN3,TST,HNRNPA1,HNRNPA2B1,XPO1,THOC6,EIF4A3,ENY2,DHX9,SLBP,RAN,HNRNPA3,WRAP53,LRPPRC,ALYREF,DDX39A
GO: Biological Process	GO:0034504	protein localization to nucleus		1.673e-05	0.1252	0.0004988	0.004737	34	300	NUP85,RPF2,FLNA,ANGPT1,GTSE1,FERMT1,CCT7,NUP35,ARL2,CCT5,SUFU,SOX9,HNRNPM,SIX4,CDK1,POLA2,TXN,PLK1,POLR1A,EI24,XPO1,PAF1,TMEM98,IRS1,PINX1,HEATR3,KPNA2,KPNA3,IPO5,RAN,DNAJB6,WRAP53,ECT2,TRIM28
GO: Biological Process	GO:0009199	ribonucleoside triphosphate metabolic process		1.683e-05	0.1259	0.0004997	0.004746	27	213	MTCO2P12,NME5,MSH2,GADD45GIP1,ATP5F1D,MYC,ATP5MC1,ATP5MC3,ATP7A,ATP5PO,NDUFA4,NDUFA9,NDUFB3,NDUFS6,NME2,UQCR11,CAD,CYCS,TMSB4X,CDK1,PKM,SLC25A23,COX6C,IMPDH2,ITPA,RAN,ENO1
GO: Biological Process	GO:0006164	purine nucleotide biosynthetic process		1.692e-05	0.1266	0.0005003	0.004752	36	326	ACAT1,SCD5,MTCO2P12,ADSL,NME5,MSH2,APRT,PAICS,GADD45GIP1,MTHFD1,ATIC,ATP5F1D,MYC,ATP5MC1,ATP5MC3,ATP7A,ATP5PO,NDUFA4,NDUFA9,NDUFB3,NDUFS6,ACSF3,NME2,UQCR11,CBR4,CYCS,TMSB4X,CDK1,PFAS,HPRT1,PKM,ELOVL6,SLC25A23,COX6C,IMPDH2,ENO1
GO: Biological Process	GO:0006298	mismatch repair		1.703e-05	0.1274	0.0005016	0.004764	10	38	ERCC1,RNASEH2A,MSH2,EXO1,PCNA,HMGB1,PMS1,POLD1,LIG1,RPA3
GO: Biological Process	GO:0044774	mitotic DNA integrity checkpoint		1.801e-05	0.1347	0.0005284	0.005018	18	112	MRE11,TICRR,GTSE1,MSH2,CLSPN,SOX4,AURKA,CCNG1,CDK1,CDC6,TOP2A,PCNA,FOXN3,PRMT1,ATF2,PRKDC,EME1,E2F1
GO: Biological Process	GO:0031145	anaphase-promoting complex-dependent catabolic process		1.838e-05	0.1375	0.0005372	0.005102	15	82	AURKA,PSME4,BUB1B,UBE2S,UBE2C,CDK1,CDC20,AURKB,PTTG1,PLK1,ANAPC4,PSMA2,PSMD3,FBXO5,MAD2L1
GO: Biological Process	GO:0007134	meiotic telophase I		1.9e-05	0.1422	0.0005489	0.005213	19	123	BRIP1,FANCD2,RMI1,RAD54L,MRE11,FANCM,NDC1,AURKA,TOP2A,PTTG1,TRIP13,CKS2,RAD54B,PLK1,ESPL1,EME1,FBXO5,SGO2,RAD51
GO: Biological Process	GO:0051326	telophase		1.9e-05	0.1422	0.0005489	0.005213	19	123	BRIP1,FANCD2,RMI1,RAD54L,MRE11,FANCM,NDC1,AURKA,TOP2A,PTTG1,TRIP13,CKS2,RAD54B,PLK1,ESPL1,EME1,FBXO5,SGO2,RAD51
GO: Biological Process	GO:0007127	meiosis I		1.9e-05	0.1422	0.0005489	0.005213	19	123	BRIP1,FANCD2,RMI1,RAD54L,MRE11,FANCM,NDC1,AURKA,TOP2A,PTTG1,TRIP13,CKS2,RAD54B,PLK1,ESPL1,EME1,FBXO5,SGO2,RAD51
GO: Biological Process	GO:0090407	organophosphate biosynthetic process		2.033e-05	0.1521	0.0005851	0.005557	66	751	PI4K2B,ERH,ACAT1,SCD5,FABP5,AFMID,MTCO2P12,ADSL,NME5,PIK3R3,SHMT1,MAGI3,MSH2,APRT,PAICS,GADD45GIP1,MTHFD1,PLEKHA3,CARD11,ATIC,MTMR9,ATP5F1D,MYC,ATP5MC1,ATP5MC3,ATP7A,ATP5PO,GARS1,LPCAT4,LHPP,NDUFA4,NDUFA9,SUCLG1,NDUFB3,NDUFS6,ACSF3,NME2,UQCR11,CAD,CBR4,SLC44A1,TAMM41,TK1,DDHD1,CYCS,TMSB4X,CDK1,PC,PIGM,PFAS,CKB,PIK3CD,HPRT1,PKM,PLCG1,ELOVL6,SLC25A23,COX6C,LPIN3,PRKG1,IMPDH2,CHPT1,DTYMK,DUT,LPCAT3,…
GO: Biological Process	GO:0007080	mitotic metaphase plate congression		2.178e-05	0.163	0.0006213	0.005901	11	47	KIF18A,NDC80,CDCA5,PSRC1,KIF2C,NUF2,PINX1,CDT1,KIFC1,KIF22,CDCA8
GO: Biological Process	GO:0033683	nucleotide-excision repair, DNA incision		2.184e-05	0.1634	0.0006213	0.005901	10	39	ERCC1,ERCC2,CUL4A,NTHL1,OGG1,PCNA,POLD1,RFC4,RFC5,RPA3
GO: Biological Process	GO:0042769	DNA damage response, detection of DNA damage		2.184e-05	0.1634	0.0006213	0.005901	10	39	CUL4A,DTL,SOX4,PCNA,POLD1,MRPS26,MRPS9,RFC4,RFC5,RPA3
GO: Biological Process	GO:0061640	cytoskeleton-dependent cytokinesis		2.436e-05	0.1823	0.0006885	0.006539	17	104	NUSAP1,MAP9,RTKN,BIRC5,SPTBN1,CIT,DCTN3,AURKB,PLK1,KIF23,ESPL1,INCENP,KIF4A,CDT1,ECT2,KIF20A,CKAP2
GO: Biological Process	GO:0006091	generation of precursor metabolites and energy		2.446e-05	0.183	0.0006885	0.006539	54	580	NUP85,ACAT1,MDH1,MDH2,ADH5,MTCO2P12,ADSL,AKT2,MPI,MYBBP1A,MSH2,DEGS1,GADD45GIP1,NUP35,NDC1,MTOR,MTFR2,ATP5F1D,LYRM7,MYC,ATP5MC1,ATP5MC3,ATP7A,ATP5PO,GAPDH,CISD1,SRD5A1,BLOC1S1,NDUFA4,NDUFA9,SUCLG1,NDUFB3,NDUFS6,NUP205,GLDC,UQCR11,GPI,GRB10,CYCS,CDK1,HMGB1,PGAM1,PHKA2,PKM,SLC25A23,COX6C,PPP1CC,BDH2,IRS1,MDH1B,LDHA,TRAP1,LOXL2,ENO1
GO: Biological Process	GO:1901607	alpha-amino acid biosynthetic process		2.447e-05	0.1831	0.0006885	0.006539	13	65	SHMT1,SEPHS1,MTHFD1,BCAT1,GLUD1,CAD,OAT,CBS,CBSL,CTH,PSPH,ALDH18A1,PYCR3
GO: Biological Process	GO:0032204	regulation of telomere maintenance		2.478e-05	0.1854	0.0006945	0.006596	15	84	ERCC1,NAF1,MRE11,CCT7,CCT5,MYC,ATRX,AURKB,HNRNPA1,HNRNPA2B1,XRCC5,ACD,USP7,PINX1,GNL3
GO: Biological Process	GO:1904666	regulation of ubiquitin protein ligase activity		2.519e-05	0.1885	0.0007034	0.006681	8	25	RPS7,USP44,UBE2S,UBE2C,CDC20,PLK1,FBXO5,MAD2L1
GO: Biological Process	GO:0009205	purine ribonucleoside triphosphate metabolic process		2.584e-05	0.1934	0.0007189	0.006828	26	206	MTCO2P12,NME5,MSH2,GADD45GIP1,ATP5F1D,MYC,ATP5MC1,ATP5MC3,ATP7A,ATP5PO,NDUFA4,NDUFA9,NDUFB3,NDUFS6,NME2,UQCR11,CYCS,TMSB4X,CDK1,PKM,SLC25A23,COX6C,IMPDH2,ITPA,RAN,ENO1
GO: Biological Process	GO:0016054	organic acid catabolic process		2.666e-05	0.1995	0.0007362	0.006992	32	281	RIDA,ACAT1,MAT1A,AFMID,AKT2,SHMT1,MTOR,ALDH7A1,PECR,BCAT1,GLDC,GLUD1,ACSF3,ABHD2,OAT,CBS,HSD17B10,CARNMT1,HADH,PCCB,PCK2,HMMR,TST,LPIN3,CTH,CYP26A1,BDH2,IRS1,DECR1,MECR,EHHADH,ECHDC2
GO: Biological Process	GO:0046395	carboxylic acid catabolic process		2.666e-05	0.1995	0.0007362	0.006992	32	281	RIDA,ACAT1,MAT1A,AFMID,AKT2,SHMT1,MTOR,ALDH7A1,PECR,BCAT1,GLDC,GLUD1,ACSF3,ABHD2,OAT,CBS,HSD17B10,CARNMT1,HADH,PCCB,PCK2,HMMR,TST,LPIN3,CTH,CYP26A1,BDH2,IRS1,DECR1,MECR,EHHADH,ECHDC2
GO: Biological Process	GO:0009260	ribonucleotide biosynthetic process		2.678e-05	0.2004	0.0007366	0.006996	36	333	ACAT1,SCD5,MTCO2P12,ADSL,NME5,MSH2,APRT,PAICS,GADD45GIP1,ATIC,ATP5F1D,MYC,ATP5MC1,ATP5MC3,ATP7A,ATP5PO,NDUFA4,NDUFA9,NDUFB3,NDUFS6,ACSF3,NME2,UQCR11,CAD,CBR4,CYCS,TMSB4X,CDK1,PFAS,HPRT1,PKM,ELOVL6,SLC25A23,COX6C,IMPDH2,ENO1
GO: Biological Process	GO:0009152	purine ribonucleotide biosynthetic process		2.7e-05	0.2021	0.0007401	0.007029	35	320	ACAT1,SCD5,MTCO2P12,ADSL,NME5,MSH2,APRT,PAICS,GADD45GIP1,ATIC,ATP5F1D,MYC,ATP5MC1,ATP5MC3,ATP7A,ATP5PO,NDUFA4,NDUFA9,NDUFB3,NDUFS6,ACSF3,NME2,UQCR11,CBR4,CYCS,TMSB4X,CDK1,PFAS,HPRT1,PKM,ELOVL6,SLC25A23,COX6C,IMPDH2,ENO1
GO: Biological Process	GO:0007224	smoothened signaling pathway		2.95e-05	0.2207	0.0008056	0.007651	21	149	TTC26,CC2D2A,FGFR2,IFT80,IFT81,STIL,WDR19,SUFU,STK36,CLUAP1,CENPJ,RPGRIP1L,KIAA0586,TMEM231,TCTN1,IFT57,DYNC2H1,WDPCP,IFT52,MEGF8,BBS7
GO: Biological Process	GO:0072521	purine-containing compound metabolic process		3.105e-05	0.2324	0.000845	0.008026	56	614	NUP85,ACAT1,SCD5,MTCO2P12,ADSL,NME5,MPI,SHMT1,MAGI3,MSH2,APRT,PAICS,GADD45GIP1,NUP35,NDC1,NUDT1,MTHFD1,CARD11,ATIC,ATP5F1D,MYC,ATP5MC1,ATP5MC3,ATP7A,ATP5PO,GAPDH,NDUFA4,NDUFA9,SUCLG1,NDUFB3,NDUFS6,NUP205,ACSF3,NME2,UQCR11,GPI,CBR4,CYCS,TMSB4X,CDK1,PDE4A,PDE7A,PFAS,PGAM1,HPRT1,PKM,ELOVL6,SLC25A23,COX6C,IMPDH2,ITPA,RAN,LDHA,EHHADH,NUDT15,ENO1
GO: Biological Process	GO:0009156	ribonucleoside monophosphate biosynthetic process		3.299e-05	0.2469	0.0008944	0.008495	9	33	ADSL,APRT,PAICS,ATIC,LHPP,CAD,PFAS,HPRT1,IMPDH2
GO: Biological Process	GO:0042262	DNA protection		3.467e-05	0.2594	0.0009366	0.008896	4	5	NUDT1,CBS,DCTPP1,NUDT15
GO: Biological Process	GO:0009167	purine ribonucleoside monophosphate metabolic process		3.503e-05	0.2621	0.000943	0.008956	10	41	ADSL,MAGI3,APRT,PAICS,CARD11,ATIC,LHPP,PFAS,HPRT1,IMPDH2
GO: Biological Process	GO:2001022	positive regulation of response to DNA damage stimulus		3.555e-05	0.266	0.0009535	0.009056	17	107	FANCB,FOXM1,APBB1,FUS,MYC,BRCA1,NSMCE1,H2AX,SPIDR,PCNA,HMGB1,PRKDC,ANKLE1,DHX9,WRAP53,TRIM28,STEAP3
GO: Biological Process	GO:0072175	epithelial tube formation		3.798e-05	0.2842	0.001015	0.00964	22	163	RPS7,FZD1,DLC1,CC2D2A,FGFR2,STIL,SPINT2,MTHFD1,SUFU,SOX4,SOX9,CLUAP1,SIX4,ARHGAP35,PFN1,CELSR1,ZIC5,TCTN1,FZD3,IFT57,IFT52,IRX2
GO: Biological Process	GO:0009150	purine ribonucleotide metabolic process		3.873e-05	0.2898	0.001031	0.009795	52	561	NUP85,ACAT1,SCD5,MTCO2P12,ADSL,NME5,MPI,MAGI3,MSH2,APRT,PAICS,GADD45GIP1,NUP35,NDC1,CARD11,ATIC,ATP5F1D,MYC,ATP5MC1,ATP5MC3,ATP7A,ATP5PO,GAPDH,NDUFA4,NDUFA9,SUCLG1,NDUFB3,NDUFS6,NUP205,ACSF3,NME2,UQCR11,GPI,CBR4,CYCS,TMSB4X,CDK1,PDE4A,PDE7A,PFAS,PGAM1,HPRT1,PKM,ELOVL6,SLC25A23,COX6C,IMPDH2,ITPA,RAN,LDHA,EHHADH,ENO1
GO: Biological Process	GO:0046390	ribose phosphate biosynthetic process		3.914e-05	0.2929	0.001038	0.009863	36	339	ACAT1,SCD5,MTCO2P12,ADSL,NME5,MSH2,APRT,PAICS,GADD45GIP1,ATIC,ATP5F1D,MYC,ATP5MC1,ATP5MC3,ATP7A,ATP5PO,NDUFA4,NDUFA9,NDUFB3,NDUFS6,ACSF3,NME2,UQCR11,CAD,CBR4,CYCS,TMSB4X,CDK1,PFAS,HPRT1,PKM,ELOVL6,SLC25A23,COX6C,IMPDH2,ENO1
GO: Biological Process	GO:0043137	DNA replication, removal of RNA primer		3.953e-05	0.2958	0.001042	0.009892	5	9	FEN1,RNASEH2A,PCNA,DNA2,LIG1
GO: Biological Process	GO:0009204	deoxyribonucleoside triphosphate catabolic process		3.953e-05	0.2958	0.001042	0.009892	5	9	NUDT1,DCTPP1,ITPA,DUT,NUDT15
GO: Biological Process	GO:0009201	ribonucleoside triphosphate biosynthetic process		3.968e-05	0.2969	0.001042	0.009895	25	199	MTCO2P12,NME5,MSH2,GADD45GIP1,ATP5F1D,MYC,ATP5MC1,ATP5MC3,ATP7A,ATP5PO,NDUFA4,NDUFA9,NDUFB3,NDUFS6,NME2,UQCR11,CAD,CYCS,TMSB4X,CDK1,PKM,SLC25A23,COX6C,IMPDH2,ENO1
GO: Biological Process	GO:0009259	ribonucleotide metabolic process		3.982e-05	0.298	0.001042	0.009895	53	576	NUP85,ACAT1,SCD5,MTCO2P12,ADSL,NME5,MPI,MAGI3,MSH2,APRT,PAICS,GADD45GIP1,NUP35,NDC1,CARD11,ATIC,ATP5F1D,MYC,ATP5MC1,ATP5MC3,ATP7A,ATP5PO,GAPDH,NDUFA4,NDUFA9,SUCLG1,NDUFB3,NDUFS6,NUP205,ACSF3,NME2,UQCR11,GPI,CAD,CBR4,CYCS,TMSB4X,CDK1,PDE4A,PDE7A,PFAS,PGAM1,HPRT1,PKM,ELOVL6,SLC25A23,COX6C,IMPDH2,ITPA,RAN,LDHA,EHHADH,ENO1
GO: Biological Process	GO:0010558	negative regulation of macromolecule biosynthetic process		3.998e-05	0.2992	0.001042	0.0099	125	1700	RIDA,USP9X,RBM10,SMC1A,JDP2,MDFI,TENM2,SNAI3,ZRANB3,CDC45,FZD1,WWC2,RACK1,MTA3,FGFR2,FOXM1,MRE11,FLNA,MYBBP1A,NACC1,APBB1,MRPL13,PHF6,SHMT1,APEX1,BIRC5,PPHLN1,LYAR,KHSRP,SCMH1,TET1,SMARCA2,C11orf95,ASB1,SUFU,MYC,SOX9,SOX15,ZMYND11,CENPJ,ATRX,GAPDH,SIX4,SAP30,CDAN1,BRCA1,TONSL,MSL3,TNRC6A,C1QBP,CBX1,LOXL3,YWHAQ,SATB2,TCF7,YBX1,GRB10,LARP1,ARHGAP35,ZNF496,ORC2,TIA1,PA2G4,ZNF431,CDC6,PCNA,AURKB,HELL…
GO: Biological Process	GO:0007100	mitotic centrosome separation		4.046e-05	0.3028	0.001048	0.009951	6	14	MAP9,AURKA,CHEK1,NDE1,KIF11,RANBP1
GO: Biological Process	GO:0051298	centrosome duplication		4.046e-05	0.3028	0.001048	0.009951	13	68	RBM14,STIL,CEP152,PLK4,CENPJ,BRCA1,CCNF,TMEM67,XPO1,ARHGEF10,CCP110,NDE1,KIAA0753
GO: Biological Process	GO:0046112	nucleobase biosynthetic process		4.256e-05	0.3185	0.001098	0.01043	7	20	SHMT1,APRT,PAICS,MTHFD1,MTOR,CAD,HPRT1
GO: Biological Process	GO:0009069	serine family amino acid metabolic process		4.386e-05	0.3282	0.001124	0.01067	10	42	RIDA,SHMT1,SEPHS1,MTHFD1,GLDC,CBS,TST,CBSL,CTH,PSPH
GO: Biological Process	GO:0009126	purine nucleoside monophosphate metabolic process		4.386e-05	0.3282	0.001124	0.01067	10	42	ADSL,MAGI3,APRT,PAICS,CARD11,ATIC,LHPP,PFAS,HPRT1,IMPDH2
GO: Biological Process	GO:0043436	oxoacid metabolic process		4.416e-05	0.3304	0.001128	0.01071	95	1219	RIDA,NUP85,ACAT1,MAT1A,MDH1,MDH2,SCD5,FABP5,AFMID,AKT2,MPI,ABCC1,ANGPT1,SHMT1,DEGS1,NUP35,SLC6A6,SEPHS1,NDC1,MTHFD1,MTOR,ATIC,ALDH7A1,B4GALT2,MYC,PECR,ATP7A,GAPDH,GARS1,NARS1,BCAT1,SUCLG1,NDUFS6,NUP205,BPHL,PSME4,BRCA1,GLDC,GLO1,GLUD1,ACSF3,GPI,MARS2,CAD,ABHD2,OAT,ODC1,SLC7A7,CBS,HPDL,FAAH2,CBR4,HSD17B10,CARNMT1,HADH,PC,PCCB,PCK2,GATB,PFAS,CYP2S1,HMMR,TST,PGAM1,CKB,PKM,ABCC2,ELOVL6,CRABP2,LPIN3,S…
GO: Biological Process	GO:1902750	negative regulation of cell cycle G2/M phase transition		4.534e-05	0.3393	0.001154	0.01096	17	109	MRE11,TICRR,DTL,CLSPN,AURKA,PSME4,BRCA1,CCNG1,CDK1,CDC6,AURKB,CHEK1,FOXN3,PLK1,PSMA2,PSMD3,PINX1
GO: Biological Process	GO:0001838	embryonic epithelial tube formation		4.851e-05	0.363	0.001231	0.01169	21	154	RPS7,FZD1,DLC1,CC2D2A,STIL,SPINT2,MTHFD1,SUFU,SOX4,SOX9,CLUAP1,SIX4,ARHGAP35,PFN1,CELSR1,ZIC5,TCTN1,FZD3,IFT57,IFT52,IRX2
GO: Biological Process	GO:0045740	positive regulation of DNA replication		5.451e-05	0.4079	0.001378	0.01309	10	43	ATAD5,CACYBP,ATRX,DBF4,CDK1,PCNA,IL6,DHX9,CDT1,DNA2
GO: Biological Process	GO:0031572	G2 DNA damage checkpoint		5.499e-05	0.4115	0.001386	0.01316	9	35	MRE11,DTL,CLSPN,BRCA1,CCNG1,CDK1,CHEK1,FOXN3,PLK1
GO: Biological Process	GO:0032259	methylation		5.589e-05	0.4182	0.001401	0.01331	41	413	FBL,MAT1A,SETD6,MRM1,EMG1,PPHLN1,TET1,EEF1AKMT2,SNRPB,MYC,WDR4,ATRX,DIMT1,BRCA1,GTPBP3,MAT2B,KMT5C,MIS18A,WDR5,GSPT1,INMT,HSD17B10,CARNMT1,HELLS,PRMT2,PRMT1,PRMT7,METTL2A,SMYD3,PNMT,PAF1,ILF3,BCOR,NSUN2,JARID2,USP7,TRDMT1,DNMT3B,NSUN7,TFB1M,TRIM28
GO: Biological Process	GO:0035148	tube formation		5.6e-05	0.419	0.001401	0.01331	23	179	RPS7,FZD1,DLC1,CC2D2A,FGFR2,STIL,SPINT2,MTHFD1,SUFU,SOX4,SOX9,CLUAP1,SIX4,ARHGAP35,PFN1,CELSR1,ZIC5,DAB2IP,TCTN1,FZD3,IFT57,IFT52,IRX2
GO: Biological Process	GO:0009890	negative regulation of biosynthetic process		5.818e-05	0.4354	0.001451	0.01378	130	1797	RIDA,USP9X,RBM10,SMC1A,JDP2,MDFI,TENM2,SNAI3,ZRANB3,CDC45,FZD1,WWC2,RACK1,MTA3,FGFR2,FOXM1,MRE11,FLNA,MYBBP1A,NACC1,APBB1,MRPL13,PHF6,SHMT1,APEX1,BIRC5,PPHLN1,LYAR,KHSRP,SCMH1,TET1,SMARCA2,C11orf95,ASB1,SUFU,SOD1,MYC,ATP5MC1,SOX9,SOX15,ZMYND11,CENPJ,ATRX,GAPDH,SIX4,SAP30,CDAN1,BRCA1,TONSL,MSL3,TNRC6A,C1QBP,CBX1,LOXL3,YWHAQ,SATB2,TCF7,YBX1,GRB10,LARP1,ARHGAP35,ZNF496,ORC2,TIA1,PA2G4,ZNF431,CDC6,PC…
GO: Biological Process	GO:0019693	ribose phosphate metabolic process		5.999e-05	0.4489	0.001491	0.01416	53	585	NUP85,ACAT1,SCD5,MTCO2P12,ADSL,NME5,MPI,MAGI3,MSH2,APRT,PAICS,GADD45GIP1,NUP35,NDC1,CARD11,ATIC,ATP5F1D,MYC,ATP5MC1,ATP5MC3,ATP7A,ATP5PO,GAPDH,NDUFA4,NDUFA9,SUCLG1,NDUFB3,NDUFS6,NUP205,ACSF3,NME2,UQCR11,GPI,CAD,CBR4,CYCS,TMSB4X,CDK1,PDE4A,PDE7A,PFAS,PGAM1,HPRT1,PKM,ELOVL6,SLC25A23,COX6C,IMPDH2,ITPA,RAN,LDHA,EHHADH,ENO1
GO: Biological Process	GO:0022414	reproductive process		6.185e-05	0.4628	0.001532	0.01455	121	1651	STX2,KIF18A,ERCC1,BRIP1,STRBP,USP9X,SMC1A,KATNAL1,MDFI,RPL39L,NDRG3,TTC26,FANCD2,FZD4,RMI1,FANCG,NME5,POLR1B,FGFR2,MERTK,RAD54L,CRTAP,MRE11,FLNA,XRN2,ANGPT1,IFT81,CCT7,MSH2,FUOM,SMC2,FANCM,WDR19,NDC1,SPINT2,RUVBL1,CCT5,NUDT1,MTOR,SCMH1,CENPI,SMARCA2,ASB1,PLK4,SOD1,SOX9,SOX15,ATRX,MCM8,AXL,SRD5A1,NASP,SIX4,BIK,AURKA,BMPR1A,PSME4,BUB1,BUB1B,C1QBP,NCAPD3,TCF7,CAD,ABHD2,SLC2A14,TEAD4,ODF2,NCAPH,CIT,C…
GO: Biological Process	GO:0051307	meiotic chromosome separation		6.299e-05	0.4714	0.001556	0.01478	8	28	RMI1,FANCM,NCAPD3,NCAPH,TOP2A,TTK,ESPL1,EME1
GO: Biological Process	GO:0090305	nucleic acid phosphodiester bond hydrolysis		6.32e-05	0.4729	0.001556	0.01478	38	374	RIDA,ERCC1,ERCC2,BRIP1,ATAD5,ZRANB3,FEN1,CUL4A,MRE11,XRN2,RNASEH2A,APEX1,FANCM,BRCA1,POP1,BOP1,CSTF2T,NTHL1,OGG1,TSEN2,EXO1,TOP2A,PCNA,HMGB1,EXOSC8,HMGB2,TSEN34,POLD1,IL6,EME1,ANKLE1,DFFA,DNA2,RFC4,RFC5,G3BP1,TRIM28,RPA3
GO: Biological Process	GO:0051299	centrosome separation		6.448e-05	0.4825	0.001576	0.01497	6	15	MAP9,AURKA,CHEK1,NDE1,KIF11,RANBP1
GO: Biological Process	GO:0000463	maturation of LSU-rRNA from tricistronic rRNA transcript (SSU-rRNA, 5.8S rRNA, LSU-rRNA)		6.448e-05	0.4825	0.001576	0.01497	6	15	RPF2,WDR12,DDX18,BOP1,URB1,RPL7
GO: Biological Process	GO:0045739	positive regulation of DNA repair		6.488e-05	0.4855	0.001576	0.01497	13	71	FANCB,FOXM1,APBB1,FUS,BRCA1,H2AX,SPIDR,PCNA,HMGB1,PRKDC,DHX9,WRAP53,TRIM28
GO: Biological Process	GO:0070192	chromosome organization involved in meiotic cell cycle		6.488e-05	0.4855	0.001576	0.01497	13	71	BRIP1,FANCD2,MRE11,SMC2,NDC1,ATRX,BUB1,BUB1B,NCAPD3,NCAPH,TRIP13,SGO2,RAD51
GO: Biological Process	GO:0009206	purine ribonucleoside triphosphate biosynthetic process		6.621e-05	0.4954	0.001603	0.01523	24	193	MTCO2P12,NME5,MSH2,GADD45GIP1,ATP5F1D,MYC,ATP5MC1,ATP5MC3,ATP7A,ATP5PO,NDUFA4,NDUFA9,NDUFB3,NDUFS6,NME2,UQCR11,CYCS,TMSB4X,CDK1,PKM,SLC25A23,COX6C,IMPDH2,ENO1
GO: Biological Process	GO:0016331	morphogenesis of embryonic epithelium		6.664e-05	0.4986	0.001609	0.01528	23	181	RPS7,FZD1,DLC1,CC2D2A,FGFR2,STIL,SPINT2,MTHFD1,SUFU,SOX4,SOX9,CLUAP1,SIX4,ARHGAP35,GRSF1,PFN1,CELSR1,ZIC5,TCTN1,FZD3,IFT57,IFT52,IRX2
GO: Biological Process	GO:0000003	reproduction		6.686e-05	0.5003	0.001609	0.01528	121	1654	STX2,KIF18A,ERCC1,BRIP1,STRBP,USP9X,SMC1A,KATNAL1,MDFI,RPL39L,NDRG3,TTC26,FANCD2,FZD4,RMI1,FANCG,NME5,POLR1B,FGFR2,MERTK,RAD54L,CRTAP,MRE11,FLNA,XRN2,ANGPT1,IFT81,CCT7,MSH2,FUOM,SMC2,FANCM,WDR19,NDC1,SPINT2,RUVBL1,CCT5,NUDT1,MTOR,SCMH1,CENPI,SMARCA2,ASB1,PLK4,SOD1,SOX9,SOX15,ATRX,MCM8,AXL,SRD5A1,NASP,SIX4,BIK,AURKA,BMPR1A,PSME4,BUB1,BUB1B,C1QBP,NCAPD3,TCF7,CAD,ABHD2,SLC2A14,TEAD4,ODF2,NCAPH,CIT,C…
GO: Biological Process	GO:0009161	ribonucleoside monophosphate metabolic process		7.163e-05	0.536	0.001718	0.01632	11	53	ADSL,MAGI3,APRT,PAICS,CARD11,ATIC,LHPP,CAD,PFAS,HPRT1,IMPDH2
GO: Biological Process	GO:0009145	purine nucleoside triphosphate biosynthetic process		7.192e-05	0.5381	0.001719	0.01633	24	194	MTCO2P12,NME5,MSH2,GADD45GIP1,ATP5F1D,MYC,ATP5MC1,ATP5MC3,ATP7A,ATP5PO,NDUFA4,NDUFA9,NDUFB3,NDUFS6,NME2,UQCR11,CYCS,TMSB4X,CDK1,PKM,SLC25A23,COX6C,IMPDH2,ENO1
GO: Biological Process	GO:0006269	DNA replication, synthesis of RNA primer		7.567e-05	0.5662	0.001798	0.01707	5	10	PCNA,PRIM1,PRIM2,DNA2,LIG1
GO: Biological Process	GO:0006188	IMP biosynthetic process		7.567e-05	0.5662	0.001798	0.01707	5	10	ADSL,PAICS,ATIC,PFAS,HPRT1
GO: Biological Process	GO:0006082	organic acid metabolic process		7.853e-05	0.5876	0.00186	0.01766	95	1238	RIDA,NUP85,ACAT1,MAT1A,MDH1,MDH2,SCD5,FABP5,AFMID,AKT2,MPI,ABCC1,ANGPT1,SHMT1,DEGS1,NUP35,SLC6A6,SEPHS1,NDC1,MTHFD1,MTOR,ATIC,ALDH7A1,B4GALT2,MYC,PECR,ATP7A,GAPDH,GARS1,NARS1,BCAT1,SUCLG1,NDUFS6,NUP205,BPHL,PSME4,BRCA1,GLDC,GLO1,GLUD1,ACSF3,GPI,MARS2,CAD,ABHD2,OAT,ODC1,SLC7A7,CBS,HPDL,FAAH2,CBR4,HSD17B10,CARNMT1,HADH,PC,PCCB,PCK2,GATB,PFAS,CYP2S1,HMMR,TST,PGAM1,CKB,PKM,ABCC2,ELOVL6,CRABP2,LPIN3,S…
GO: Biological Process	GO:0000470	maturation of LSU-rRNA		8.546e-05	0.6395	0.002017	0.01916	7	22	RPF2,WDR12,DDX18,BOP1,MRPL1,URB1,RPL7
GO: Biological Process	GO:0006296	nucleotide-excision repair, DNA incision, 5'-to lesion		8.823e-05	0.6602	0.00207	0.01966	9	37	ERCC1,ERCC2,CUL4A,NTHL1,PCNA,POLD1,RFC4,RFC5,RPA3
GO: Biological Process	GO:0007143	female meiotic nuclear division		8.823e-05	0.6602	0.00207	0.01966	9	37	AURKA,NCAPH,TOP2A,TRIP13,TTK,PLK1,PRKAR1A,FBXO5,SGO2
GO: Biological Process	GO:0000079	regulation of cyclin-dependent protein serine/threonine kinase activity		8.897e-05	0.6658	0.002081	0.01976	16	104	STIL,PSRC1,CCNA2,CCNF,CCNG1,CCNB2,CDC6,CDC25A,CDKN2C,CDKN3,CKS1B,CKS2,PKD1,FBXO7,PLK1,IPO5
GO: Biological Process	GO:0006289	nucleotide-excision repair		9.047e-05	0.677	0.002109	0.02003	17	115	ERCC1,ERCC2,BRIP1,CUL4A,NTHL1,OGG1,PCNA,HMGB1,HMGN1,GTF2H2C,POLD1,POLR2L,USP7,RFC4,RFC5,LIG1,RPA3
GO: Biological Process	GO:0000076	DNA replication checkpoint		9.863e-05	0.7381	0.002285	0.0217	6	16	CDC45,TICRR,CLSPN,CDC6,CDT1,DNA2
GO: Biological Process	GO:0090231	regulation of spindle checkpoint		9.863e-05	0.7381	0.002285	0.0217	6	16	USP44,NDC80,AURKA,CDT1,DYNC1LI1,MAD2L1
GO: Biological Process	GO:0006189	'de novo' IMP biosynthetic process		9.966e-05	0.7457	0.002297	0.02182	4	6	ADSL,PAICS,ATIC,PFAS
GO: Biological Process	GO:1901605	alpha-amino acid metabolic process		9.977e-05	0.7466	0.002297	0.02182	26	223	RIDA,ACAT1,MAT1A,AFMID,SHMT1,SEPHS1,MTHFD1,ALDH7A1,ATP7A,BCAT1,GLDC,GLUD1,CAD,OAT,ODC1,SLC7A7,CBS,CARNMT1,PFAS,TST,CBSL,CTH,PSPH,ALDH18A1,PYCR3,EGLN3
GO: Biological Process	GO:2000113	negative regulation of cellular macromolecule biosynthetic process		0.000103	0.7706	0.002364	0.02245	117	1605	RIDA,USP9X,RBM10,SMC1A,JDP2,MDFI,TENM2,SNAI3,ZRANB3,CDC45,FZD1,WWC2,RACK1,MTA3,FGFR2,FOXM1,MRE11,FLNA,MYBBP1A,NACC1,APBB1,MRPL13,PHF6,SHMT1,BIRC5,PPHLN1,LYAR,KHSRP,SCMH1,TET1,SMARCA2,C11orf95,SUFU,MYC,SOX9,SOX15,ZMYND11,ATRX,GAPDH,SIX4,SAP30,CDAN1,BRCA1,MSL3,TNRC6A,C1QBP,CBX1,LOXL3,YWHAQ,SATB2,TCF7,YBX1,GRB10,LARP1,ARHGAP35,ZNF496,ORC2,TIA1,PA2G4,ZNF431,CDC6,PCNA,AURKB,HELLS,CENPF,CBX3,HMGB1,HMGB…
GO: Biological Process	GO:0051984	positive regulation of chromosome segregation		0.0001081	0.8091	0.002467	0.02343	8	30	FEN1,CDC6,ANAPC4,ESPL1,DLGAP5,SGO2,CDT1,SMC6
GO: Biological Process	GO:0070198	protein localization to chromosome, telomeric region		0.0001081	0.8091	0.002467	0.02343	8	30	CCT7,CCT5,ATRX,XRCC5,ACD,PINX1,GNL3,WRAP53
GO: Biological Process	GO:0140053	mitochondrial gene expression		0.0001218	0.9117	0.002771	0.02632	21	164	MRPL23,MTG1,MRPS17,MRPL13,MRPL28,GADD45GIP1,PUS1,GARS1,C1QBP,TFAM,HSD17B10,GATB,MRPS26,MRPS9,MRPL36,MRPL11,MRPL1,EARS2,MRPL16,MRPL4,LRPPRC
GO: Biological Process	GO:0031327	negative regulation of cellular biosynthetic process		0.0001228	0.9192	0.002785	0.02645	126	1761	RIDA,USP9X,RBM10,SMC1A,JDP2,MDFI,TENM2,SNAI3,ZRANB3,CDC45,FZD1,WWC2,RACK1,MTA3,FGFR2,FOXM1,MRE11,FLNA,MYBBP1A,NACC1,APBB1,MRPL13,PHF6,SHMT1,APEX1,BIRC5,PPHLN1,LYAR,KHSRP,SCMH1,TET1,SMARCA2,C11orf95,ASB1,SUFU,MYC,SOX9,SOX15,ZMYND11,CENPJ,ATRX,GAPDH,SIX4,SAP30,CDAN1,BRCA1,TONSL,MSL3,TNRC6A,C1QBP,CBX1,LOXL3,YWHAQ,SATB2,TCF7,YBX1,GRB10,LARP1,ARHGAP35,ZNF496,ORC2,TIA1,PA2G4,ZNF431,CDC6,PCNA,AURKB,HELL…
GO: Biological Process	GO:0000018	regulation of DNA recombination		0.0001257	0.9403	0.002841	0.02698	16	107	ERCC2,ATAD5,ZRANB3,FANCB,MRE11,MSH2,RAD51AP1,FUS,SPIDR,CHEK1,RMI2,ANKLE1,KPNA2,RAD51,WRAP53,ALYREF
GO: Biological Process	GO:0006107	oxaloacetate metabolic process		0.0001328	0.9937	0.002993	0.02843	5	11	MDH1,MDH2,PC,PCK2,MDH1B
GO: Biological Process	GO:2000573	positive regulation of DNA biosynthetic process		0.0001341	1	0.003014	0.02863	13	76	NAF1,CCT7,CCT5,MYC,AURKB,HNRNPA1,HNRNPA2B1,DSCC1,XRCC5,ACD,WRAP53,RFC4,RFC5
GO: Biological Process	GO:1904029	regulation of cyclin-dependent protein kinase activity		0.0001405	1	0.003148	0.0299	16	108	STIL,PSRC1,CCNA2,CCNF,CCNG1,CCNB2,CDC6,CDC25A,CDKN2C,CDKN3,CKS1B,CKS2,PKD1,FBXO7,PLK1,IPO5
GO: Biological Process	GO:0007076	mitotic chromosome condensation		0.0001458	1	0.003256	0.03092	6	17	NUSAP1,SMC2,CDCA5,NCAPG,NCAPD3,NCAPH
GO: Biological Process	GO:0019343	cysteine biosynthetic process via cystathionine		0.0001477	1	0.003279	0.03114	3	3	CBS,CBSL,CTH
GO: Biological Process	GO:0071163	DNA replication preinitiation complex assembly		0.0001477	1	0.003279	0.03114	3	3	CDC45,CDT1,GMNN
GO: Biological Process	GO:0010972	negative regulation of G2/M transition of mitotic cell cycle		0.0001551	1	0.003435	0.03262	15	98	MRE11,TICRR,CLSPN,AURKA,PSME4,BRCA1,CCNG1,CDK1,CDC6,AURKB,CHEK1,FOXN3,PSMA2,PSMD3,PINX1
GO: Biological Process	GO:0007063	regulation of sister chromatid cohesion		0.0001583	1	0.003494	0.03319	7	24	FEN1,CDCA5,ATRX,BUB1,RECQL4,ESPL1,SGO2
GO: Biological Process	GO:0008380	RNA splicing		0.0001588	1	0.003495	0.03319	44	476	ZNF326,RBM10,AKT2,TTF2,SRSF1,SRSF7,KHSRP,SRRT,FRG1,FUS,SNRPA,SNRPB,SNRPD1,SNRPF,HNRNPM,TXNL4A,RBMX,C1QBP,CSTF2T,YBX1,TSEN2,ZC3H10,LSM6,PSIP1,TIA1,HNRNPA1,LSM5,HNRNPA2B1,TSEN34,PRMT7,WDR77,POLR2L,GEMIN5,THOC6,SF3B5,EIF4A3,DHX9,SNRNP25,HNRNPA3,DAZAP1,SUGP2,ALYREF,RP9,DDX39A
GO: Biological Process	GO:0001841	neural tube formation		0.000164	1	0.0036	0.03419	18	132	RPS7,FZD1,DLC1,CC2D2A,STIL,SPINT2,MTHFD1,SUFU,SOX4,CLUAP1,ARHGAP35,PFN1,CELSR1,ZIC5,TCTN1,FZD3,IFT57,IFT52
GO: Biological Process	GO:0051028	mRNA transport		0.0001722	1	0.003767	0.03578	20	156	NUP85,SRSF1,SRSF7,NUP35,KHSRP,NDC1,NUP205,CETN3,HNRNPA1,HNRNPA2B1,XPO1,THOC6,EIF4A3,ENY2,DHX9,SLBP,HNRNPA3,LRPPRC,ALYREF,DDX39A
GO: Biological Process	GO:0019886	antigen processing and presentation of exogenous peptide antigen via MHC class II		0.0001742	1	0.003801	0.0361	15	99	KIF18A,KIF2C,DCTN3,HLA-DQB1,HLA-DRB5,AP1S1,KIF23,CTSV,KIF4A,DCTN1,KIF15,KIF11,KIF22,AP1M2,DYNC1LI1
GO: Biological Process	GO:0051785	positive regulation of nuclear division		0.0001759	1	0.003818	0.03626	13	78	NUSAP1,BIRC5,CDCA5,AURKA,UBE2C,ANAPC4,ESPL1,DLGAP5,FBXO5,SGO2,CDT1,RANBP1,LRP5
GO: Biological Process	GO:0006734	NADH metabolic process		0.000176	1	0.003818	0.03626	10	49	MDH1,MDH2,GAPDH,GPI,PCK2,PGAM1,PKM,MDH1B,LDHA,ENO1
GO: Biological Process	GO:0043414	macromolecule methylation		0.0001847	1	0.003995	0.03794	35	352	FBL,SETD6,MRM1,EMG1,PPHLN1,TET1,EEF1AKMT2,SNRPB,MYC,WDR4,ATRX,DIMT1,BRCA1,GTPBP3,KMT5C,MIS18A,WDR5,GSPT1,HSD17B10,HELLS,PRMT2,PRMT1,PRMT7,METTL2A,SMYD3,PAF1,ILF3,BCOR,NSUN2,JARID2,USP7,TRDMT1,DNMT3B,TFB1M,TRIM28
GO: Biological Process	GO:0097327	response to antineoplastic agent		0.0001947	1	0.004199	0.03988	16	111	FANCB,ATRX,SRD5A1,BRCA1,LARP1,SPIDR,PCK2,PCNA,SERPINF1,HNRNPA1,ABCC2,SMYD3,DHFR,DNMT3B,RAD51,RAP1A
GO: Biological Process	GO:0051253	negative regulation of RNA metabolic process		0.0002024	1	0.004352	0.04133	107	1467	USP9X,RBM10,JDP2,MDFI,TENM2,SNAI3,CDC45,FZD1,WWC2,MTA3,NAF1,AKT2,FGFR2,FOXM1,FLNA,MYBBP1A,SRSF7,NACC1,APBB1,PHF6,APEX1,BIRC5,PPHLN1,LYAR,MTOR,SCMH1,TET1,SMARCA2,C11orf95,SUFU,MYC,SOX9,SOX15,ZMYND11,CENPJ,ATRX,SIX4,SAP30,BRCA1,RBMX,TONSL,MSL3,C1QBP,CBX1,LOXL3,YWHAQ,SATB2,TCF7,YBX1,LARP1,ARHGAP35,ZNF496,ORC2,ZC3H10,PA2G4,ZNF431,PCNA,AURKB,HELLS,CENPF,ZMYND8,CBX3,HMGB1,HMGB2,FOXN3,HNRNPA2B1,HNRNPAB,…
GO: Biological Process	GO:0009113	purine nucleobase biosynthetic process		0.0002179	1	0.004672	0.04438	5	12	SHMT1,APRT,PAICS,MTHFD1,HPRT1
GO: Biological Process	GO:1903608	protein localization to cytoplasmic stress granule		0.0002229	1	0.004758	0.04519	4	7	SSB,YBX1,TIA1,DHX9
GO: Biological Process	GO:0021915	neural tube development		0.0002232	1	0.004758	0.04519	23	196	RPS7,FZD1,DLC1,CC2D2A,STIL,WDR19,SPINT2,MTHFD1,SUFU,SOX4,CLUAP1,TCF7,RPGRIP1L,ARHGAP35,PFN1,ZNF358,PKD1,CELSR1,ZIC5,TCTN1,FZD3,IFT57,IFT52
GO: Biological Process	GO:0032543	mitochondrial translation		0.0002398	1	0.005063	0.04808	18	136	MRPL23,MTG1,MRPS17,MRPL13,MRPL28,GADD45GIP1,GARS1,C1QBP,GATB,MRPS26,MRPS9,MRPL36,MRPL11,MRPL1,EARS2,MRPL16,MRPL4,LRPPRC
GO: Biological Process	GO:1900180	regulation of protein localization to nucleus		0.0002398	1	0.005063	0.04808	18	136	FLNA,ANGPT1,GTSE1,FERMT1,CCT7,CCT5,SUFU,HNRNPM,CDK1,PLK1,POLR1A,EI24,TMEM98,PINX1,IPO5,RAN,ECT2,TRIM28
GO: Biological Process	GO:0006405	RNA export from nucleus		0.0002398	1	0.005063	0.04808	18	136	NUP85,SRSF1,SRSF7,NUP35,NDC1,SSB,NUP205,HNRNPA1,HNRNPA2B1,XPO1,THOC6,EIF4A3,ENY2,DHX9,SLBP,RAN,ALYREF,DDX39A
GO: Biological Process	GO:0006278	RNA-dependent DNA biosynthetic process		0.0002402	1	0.005063	0.04808	16	113	NAF1,MRE11,CCT7,CCT5,MYC,TOP2A,AURKB,HNRNPA1,HNRNPA2B1,XRCC5,PPIA,ACD,TELO2,PINX1,WRAP53,TRIM28
GO: Biological Process	GO:0002181	cytoplasmic translation		0.0002441	1	0.005132	0.04874	15	102	RPL36A,RPS2,MCTS2P,TICRR,MTOR,EIF3B,GSPT1,GSPT2,DHX9,RPSA,LIN28A,DPH6,HSPA14,RPL8,RPL17
GO: Biological Process	GO:0051129	negative regulation of cellular component organization		0.0002543	1	0.00533	0.05063	66	818	ERCC1,MCM2,ADD3,USP44,DLC1,NDC80,RBM14,SEMA6A,FGFR2,CAMSAP1,FLNA,ARFGEF1,BIRC5,NLGN1,SHROOM2,ARHGAP4,TET1,SORL1,ATRX,SPTBN1,BRCA1,BUB1,BUB1B,CIT,CCNF,TMSB4X,CDC20,TOP2A,AURKB,TMEM67,PTTG1,CENPF,CORO1C,HMGB1,TWF2,CHEK1,PFN1,TRIP13,TTK,HNRNPA1,RECQL4,PLK1,PACSIN1,XRCC5,YWHAH,RBPJ,PRKAR1A,ESPL1,CCP110,MYADM,ACD,BCOR,JARID2,DFFA,FBXO5,SACS,PINX1,CDT1,DNMT3B,ESPN,HDAC6,DNAJB6,MCTP1,DYNC1LI1,CKAP2,MAD2…
GO: Biological Process	GO:0055114	oxidation-reduction process		0.0002551	1	0.005332	0.05064	92	1231	NUP85,ACAT1,MDH1,MDH2,SCD5,ADH5,MTCO2P12,ADSL,AKT2,MPI,MYBBP1A,FOXRED1,APEX1,DEGS1,NUP35,NDC1,MTHFD1,MTOR,TET1,MTFR2,ALDH7A1,SOD1,ATP5F1D,LYRM7,MYC,PECR,ATP7A,GAPDH,CISD1,SRD5A1,BCAT1,BLOC1S1,NDUFA4,NDUFA9,SUCLG1,NDUFB3,NDUFS6,NUP205,STAB1,GLDC,GLUD1,LOXL3,UQCR11,GPI,GRB10,TXNDC17,RTN4IP1,CBS,HPDL,CBR4,CYCS,HSD17B10,CDK1,HADH,CDH3,PCK2,HMGB1,CYP2S1,PGAM1,TXN,PHKA2,PKM,SMOX,SLC25A23,COX6C,PPP1CC,I…
GO: Biological Process	GO:0045840	positive regulation of mitotic nuclear division		0.0002688	1	0.005602	0.05321	11	61	NUSAP1,BIRC5,CDCA5,AURKA,UBE2C,ANAPC4,ESPL1,DLGAP5,CDT1,RANBP1,LRP5
GO: Biological Process	GO:0009166	nucleotide catabolic process		0.0002703	1	0.005618	0.05336	12	71	ACAT1,NUDT1,NTHL1,OGG1,PDE4A,PDE7A,HPRT1,DCTPP1,ITPA,ENPP5,DUT,NUDT15
GO: Biological Process	GO:0002495	antigen processing and presentation of peptide antigen via MHC class II		0.0002723	1	0.005628	0.05346	15	103	KIF18A,KIF2C,DCTN3,HLA-DQB1,HLA-DRB5,AP1S1,KIF23,CTSV,KIF4A,DCTN1,KIF15,KIF11,KIF22,AP1M2,DYNC1LI1
GO: Biological Process	GO:0044773	mitotic DNA damage checkpoint		0.0002723	1	0.005628	0.05346	15	103	MRE11,GTSE1,MSH2,CLSPN,SOX4,AURKA,CCNG1,CDK1,PCNA,FOXN3,PRMT1,ATF2,PRKDC,EME1,E2F1
GO: Biological Process	GO:0006312	mitotic recombination		0.0002747	1	0.005662	0.05377	7	26	ERCC1,ERCC2,MRE11,RAD54B,ANKLE1,RAD51,SMC6
GO: Biological Process	GO:0044818	mitotic G2/M transition checkpoint		0.0002788	1	0.005702	0.05416	8	34	MRE11,TICRR,CLSPN,BRCA1,CCNG1,CDK1,CDC6,FOXN3
GO: Biological Process	GO:0050657	nucleic acid transport		0.0002789	1	0.005702	0.05416	23	199	NUP85,SRSF1,SRSF7,NUP35,KHSRP,NDC1,SSB,NUP205,CETN3,TST,HNRNPA1,HNRNPA2B1,XPO1,THOC6,EIF4A3,ENY2,DHX9,SLBP,RAN,HNRNPA3,LRPPRC,ALYREF,DDX39A
GO: Biological Process	GO:0050658	RNA transport		0.0002789	1	0.005702	0.05416	23	199	NUP85,SRSF1,SRSF7,NUP35,KHSRP,NDC1,SSB,NUP205,CETN3,TST,HNRNPA1,HNRNPA2B1,XPO1,THOC6,EIF4A3,ENY2,DHX9,SLBP,RAN,HNRNPA3,LRPPRC,ALYREF,DDX39A
GO: Biological Process	GO:0019637	organophosphate metabolic process		0.0002877	1	0.005867	0.05572	90	1203	PI4K2B,ERH,NUP85,ACAT1,ABHD6,SCD5,FABP5,AFMID,MTCO2P12,ADSL,NME5,OSBPL10,MPI,PIK3R3,SHMT1,MAGI3,MSH2,APRT,PAICS,GADD45GIP1,NUP35,NDC1,NUDT1,MTHFD1,PLEKHA3,CARD11,ATIC,MTMR9,ATP5F1D,MYC,ATP5MC1,ATP5MC3,ATP7A,ATP5PO,GAPDH,GARS1,LPCAT4,LHPP,NDUFA4,NDUFA9,SUCLG1,NDUFB3,NDUFS6,NUP205,ACSF3,NME2,UQCR11,GPI,CAD,NTHL1,OGG1,CBR4,SLC44A1,TAMM41,TK1,DDHD1,CYCS,TMSB4X,CDK1,PC,PIGM,PDE4A,PDE7A,PFAS,PGAM1,CKB,…
GO: Biological Process	GO:0017144	drug metabolic process		0.0002904	1	0.005906	0.05609	62	760	RIDA,ACAT1,MAT1A,ADH5,MTCO2P12,ADSL,AKT2,ABCC1,SHMT1,MSH2,APRT,GADD45GIP1,KHSRP,MTHFD1,MTOR,SOD1,ATP5F1D,MYC,ATP5MC1,ATP5MC3,PECR,ATP7A,ATP5PO,SRD5A1,NDUFA4,NDUFA9,SUCLG1,NDUFB3,NDUFS6,GLDC,UQCR11,CAD,MAT2B,OAT,CBS,CBR4,CYCS,TMSB4X,CARNMT1,CDK1,PC,PCCB,PCK2,CYP2S1,CKB,HPRT1,PKM,ABCC2,SMOX,SLC25A23,COX6C,CBSL,CTH,IL6,BDH2,CHPT1,DHFR,ALDH18A1,PYCR3,HDAC6,NUDT15,ENO1
GO: Biological Process	GO:1901796	regulation of signal transduction by p53 class mediator		0.000292	1	0.005922	0.05624	22	187	BRIP1,ATAD5,RPS7,RMI1,RPF2,MRE11,TPX2,SSRP1,AURKA,BRCA1,BOP1,EXO1,AURKB,CHEK1,RMI2,PAK1IP1,DNA2,RFC4,RFC5,STEAP3,TAF15,RPA3
GO: Biological Process	GO:0008652	cellular amino acid biosynthetic process		0.0002939	1	0.005935	0.05637	13	82	SHMT1,SEPHS1,MTHFD1,BCAT1,GLUD1,CAD,OAT,CBS,CBSL,CTH,PSPH,ALDH18A1,PYCR3
GO: Biological Process	GO:0006301	postreplication repair		0.0002942	1	0.005935	0.05637	10	52	DTL,MSH2,BRCA1,NSMCE1,PCNA,POLD1,POLE2,RFC4,RFC5,RPA3
GO: Biological Process	GO:0002504	antigen processing and presentation of peptide or polysaccharide antigen via MHC class II		0.0003032	1	0.006098	0.05792	15	104	KIF18A,KIF2C,DCTN3,HLA-DQB1,HLA-DRB5,AP1S1,KIF23,CTSV,KIF4A,DCTN1,KIF15,KIF11,KIF22,AP1M2,DYNC1LI1
GO: Biological Process	GO:0006220	pyrimidine nucleotide metabolic process		0.0003116	1	0.006252	0.05938	11	62	ERH,NME5,SHMT1,NME2,CAD,NTHL1,OGG1,TAMM41,DCTPP1,DTYMK,DUT
GO: Biological Process	GO:0090148	membrane fission		0.0003149	1	0.0063	0.05983	22	188	NUSAP1,MAP9,RTKN,BIRC5,SPTBN1,AURKA,CIT,CDC6,DCTN3,AURKB,CORO1C,PLK1,KIF23,ESPL1,CCP110,INCENP,KIF4A,CDT1,ECT2,KIF20A,CKAP2,CSPP1
GO: Biological Process	GO:0009314	response to radiation		0.0003182	1	0.006349	0.0603	45	506	ERCC1,ERCC2,SMC1A,ZRANB3,FANCD2,FANCG,FEN1,AKT2,RAD54L,TICRR,DTL,APBB1,MSH2,RAD51AP1,TRIM32,MTOR,B4GALT2,MYC,METAP1,BRCA1,REEP6,OGG1,DDIAS,CEP250,H2AX,SPIDR,CDC25A,PCNA,AURKB,HMGN1,CHEK1,PLEKHB1,TXN,RAD54B,NUCKS1,POLD1,EI24,XRCC5,PPP1CC,PRKDC,DNMT3B,RAD51,KRAS,ECT2,EEF1D
GO: Biological Process	GO:0051168	nuclear export		0.0003225	1	0.006419	0.06096	23	201	NUP85,SRSF1,SRSF7,GTSE1,NUP35,NDC1,SSB,NUP205,HNRNPA1,HNRNPA2B1,TXN,PKD1,XPO1,THOC6,EIF4A3,ANKLE1,ENY2,DHX9,SLBP,RAN,ALYREF,EMD,DDX39A
GO: Biological Process	GO:0072527	pyrimidine-containing compound metabolic process		0.000337	1	0.00669	0.06354	15	105	ERH,NME5,SHMT1,MTOR,TET1,NME2,CAD,NTHL1,OGG1,TAMM41,TK1,DCTPP1,PYCR3,DTYMK,DUT
GO: Biological Process	GO:0046040	IMP metabolic process		0.000339	1	0.006693	0.06357	5	13	ADSL,PAICS,ATIC,PFAS,HPRT1
GO: Biological Process	GO:0006534	cysteine metabolic process		0.000339	1	0.006693	0.06357	5	13	MTHFD1,CBS,TST,CBSL,CTH
GO: Biological Process	GO:0060249	anatomical structure homeostasis		0.0003421	1	0.006737	0.06399	44	493	ERCC1,F2R,NAF1,FEN1,MRE11,APEX1,CCT7,CCT5,TRIM32,SOD1,MYC,SOX9,ATRX,NCDN,CALB2,EXO1,CDH3,PCNA,AURKB,POLA2,HNRNPA1,HNRNPA2B1,RECQL4,POLD1,POLE2,XRCC5,PRIM1,PRIM2,PRKDC,IL6,ACD,DCTN1,TELO2,USP7,PINX1,DNA2,GNL3,RAD51,KRAS,SMC6,WRAP53,RFC4,RFC5,RPA3
GO: Biological Process	GO:0006997	nucleus organization		0.0003436	1	0.006748	0.06409	19	152	GOLM1,EMG1,POLR1B,NUP35,NDC1,NUP205,CDAN1,PSME4,CCNB2,CDK1,HMGB2,CHEK1,PLK1,VRK1,SERBP1,DCTN1,NECTIN2,WRAP53,EMD
GO: Biological Process	GO:0040001	establishment of mitotic spindle localization		0.0003451	1	0.006761	0.06421	8	35	NUSAP1,SPRY1,NDC80,PLK1,ESPL1,NDE1,DCTN1,MAD2L1
GO: Biological Process	GO:0051236	establishment of RNA localization		0.0003465	1	0.00677	0.0643	23	202	NUP85,SRSF1,SRSF7,NUP35,KHSRP,NDC1,SSB,NUP205,CETN3,TST,HNRNPA1,HNRNPA2B1,XPO1,THOC6,EIF4A3,ENY2,DHX9,SLBP,RAN,HNRNPA3,LRPPRC,ALYREF,DDX39A
GO: Biological Process	GO:0006283	transcription-coupled nucleotide-excision repair		0.0003529	1	0.006877	0.06531	12	73	ERCC1,ERCC2,CUL4A,PCNA,HMGN1,POLD1,POLR2L,USP7,RFC4,RFC5,LIG1,RPA3
GO: Biological Process	GO:0044458	motile cilium assembly		0.0003543	1	0.006886	0.0654	7	27	ZMYND10,CC2D2A,RSPH9,LRRC46,CENPJ,CCDC40,IFT57
GO: Biological Process	GO:0090224	regulation of spindle organization		0.0003626	1	0.007029	0.06676	9	44	MAP9,SMC1A,TACC3,SPAG5,TPX2,PSRC1,PKD1,PLK1,DCTN1
GO: Biological Process	GO:0009264	deoxyribonucleotide catabolic process		0.0003992	1	0.007718	0.0733	6	20	NUDT1,NTHL1,OGG1,DCTPP1,DUT,NUDT15
GO: Biological Process	GO:0072422	signal transduction involved in DNA damage checkpoint		0.0004016	1	0.007725	0.07337	12	74	GTSE1,DTL,SOX4,AURKA,BRCA1,CDK1,PCNA,CHEK1,PRMT1,PLK1,PRKDC,E2F1
GO: Biological Process	GO:0072401	signal transduction involved in DNA integrity checkpoint		0.0004016	1	0.007725	0.07337	12	74	GTSE1,DTL,SOX4,AURKA,BRCA1,CDK1,PCNA,CHEK1,PRMT1,PLK1,PRKDC,E2F1
GO: Biological Process	GO:0022618	ribonucleoprotein complex assembly		0.0004119	1	0.00789	0.07494	29	284	RPS2,RPS10,NUFIP1,MCTS2P,NAF1,RPF2,TICRR,SRSF1,RUVBL1,EIF3B,SNRPB,SNRPD1,SNRPF,MDN1,TXNL4A,RBMX,C1QBP,BOP1,PSIP1,PPAN,NLE1,PRMT7,WDR77,GEMIN5,MRPL11,DHX9,RPSA,G3BP1,MRTO4
GO: Biological Process	GO:0000910	cytokinesis		0.0004123	1	0.00789	0.07494	21	179	NUSAP1,MAP9,RTKN,BIRC5,SPTBN1,AURKA,CIT,CDC6,DCTN3,AURKB,PLK1,KIF23,ESPL1,CCP110,INCENP,KIF4A,CDT1,ECT2,KIF20A,CKAP2,CSPP1
GO: Biological Process	GO:0006397	mRNA processing		0.0004174	1	0.007967	0.07567	48	557	ZNF326,ERCC2,RBM10,TTF2,XRN2,SRSF1,SRSF7,KHSRP,SRRT,FRG1,FUS,SNRPA,SNRPB,SNRPD1,SNRPF,HNRNPM,TXNL4A,RBMX,C1QBP,CSTF2T,YBX1,TSEN2,GRSF1,ZC3H10,LSM6,PSIP1,TIA1,EXOSC8,HNRNPA1,LSM5,HNRNPA2B1,TSEN34,PRMT7,WDR77,POLR2L,GEMIN5,PAF1,THOC6,SF3B5,EIF4A3,DHX9,SLBP,SNRNP25,HNRNPA3,DAZAP1,SUGP2,ALYREF,DDX39A
GO: Biological Process	GO:0044265	cellular macromolecule catabolic process		0.0004233	1	0.008048	0.07644	89	1201	RIDA,RPL34,RPL36A,RPS2,USP9X,RBM10,LAPTM4B,RPS7,RPS10,USP44,RACK1,NAF1,FEN1,CUL4A,XRN2,RNASEH2A,DTL,APEX1,KHSRP,MSN,TRIM32,MTOR,SUFU,HNRNPM,SSB,AURKA,PSME4,POP1,BUB1B,TNRC6A,UBE2S,YBX1,UBE2C,LARP1,GSPT1,CCNF,LSM6,CDK1,CDC20,PCNA,AURKB,TMEM67,PTTG1,CTSC,HMGB1,EXOSC8,HMGB2,LSM5,GSPT2,UCHL1,PKD1,FBXO7,PLK1,ANAPC4,SGTB,DNAJC18,XPO1,UBR3,FBXO27,CTSV,IL6,DAB2IP,SERBP1,EIF4A3,PSMA2,PSMD3,DHX9,DFFA,FBXO5…
GO: Biological Process	GO:0009394	2'-deoxyribonucleotide metabolic process		0.0004238	1	0.008048	0.07644	8	36	SHMT1,NUDT1,NTHL1,OGG1,DCTPP1,DTYMK,DUT,NUDT15
GO: Biological Process	GO:0016321	female meiosis chromosome segregation		0.0004275	1	0.008099	0.07692	4	8	NCAPH,TOP2A,TTK,PLK1
GO: Biological Process	GO:0008033	tRNA processing		0.0004461	1	0.008429	0.08006	17	131	OSGEP,SEPHS1,PUS1,WDR4,SSB,POP1,GTPBP3,TSEN2,GRSF1,LSM6,HSD17B10,TSEN34,METTL2A,PUS7,PTCD1,NSUN2,TRDMT1
GO: Biological Process	GO:0015980	energy derivation by oxidation of organic compounds		0.0004498	1	0.008478	0.08052	31	313	MDH1,MDH2,MTCO2P12,ADSL,AKT2,MYBBP1A,MTOR,MTFR2,ATP5F1D,LYRM7,MYC,CISD1,BLOC1S1,NDUFA4,NDUFA9,SUCLG1,NDUFB3,NDUFS6,UQCR11,GRB10,CYCS,CDK1,HMGB1,PHKA2,SLC25A23,COX6C,PPP1CC,IRS1,MDH1B,LDHA,TRAP1
GO: Biological Process	GO:0072395	signal transduction involved in cell cycle checkpoint		0.0004559	1	0.008571	0.0814	12	75	GTSE1,DTL,SOX4,AURKA,BRCA1,CDK1,PCNA,CHEK1,PRMT1,PLK1,PRKDC,E2F1
GO: Biological Process	GO:0010833	telomere maintenance via telomere lengthening		0.0004735	1	0.008879	0.08433	13	86	NAF1,MRE11,CCT7,CCT5,AURKB,HNRNPA1,HNRNPA2B1,XRCC5,ACD,TELO2,PINX1,RAD51,WRAP53
GO: Biological Process	GO:0006754	ATP biosynthetic process		0.0004787	1	0.008956	0.08506	21	181	MTCO2P12,MSH2,GADD45GIP1,ATP5F1D,MYC,ATP5MC1,ATP5MC3,ATP7A,ATP5PO,NDUFA4,NDUFA9,NDUFB3,NDUFS6,UQCR11,CYCS,TMSB4X,CDK1,PKM,SLC25A23,COX6C,ENO1
GO: Biological Process	GO:0009143	nucleoside triphosphate catabolic process		0.0005048	1	0.009351	0.08881	5	14	NUDT1,DCTPP1,ITPA,DUT,NUDT15
GO: Biological Process	GO:0090266	regulation of mitotic cell cycle spindle assembly checkpoint		0.0005048	1	0.009351	0.08881	5	14	USP44,NDC80,CDT1,DYNC1LI1,MAD2L1
GO: Biological Process	GO:1903504	regulation of mitotic spindle checkpoint		0.0005048	1	0.009351	0.08881	5	14	USP44,NDC80,CDT1,DYNC1LI1,MAD2L1
GO: Biological Process	GO:0006268	DNA unwinding involved in DNA replication		0.0005048	1	0.009351	0.08881	5	14	MCM2,MCM6,MCM7,RECQL4,RAD51
GO: Biological Process	GO:0051293	establishment of spindle localization		0.0005134	1	0.009486	0.09009	9	46	NUSAP1,SPRY1,NDC80,SPAG5,PLK1,ESPL1,NDE1,DCTN1,MAD2L1
GO: Biological Process	GO:1904358	positive regulation of telomere maintenance via telomere lengthening		0.0005163	1	0.009516	0.09038	8	37	NAF1,CCT7,CCT5,AURKB,HNRNPA1,HNRNPA2B1,XRCC5,ACD
GO: Biological Process	GO:0046386	deoxyribose phosphate catabolic process		0.0005344	1	0.009778	0.09286	6	21	NUDT1,NTHL1,OGG1,DCTPP1,DUT,NUDT15
GO: Biological Process	GO:0009219	pyrimidine deoxyribonucleotide metabolic process		0.0005344	1	0.009778	0.09286	6	21	SHMT1,NTHL1,OGG1,DCTPP1,DTYMK,DUT
GO: Biological Process	GO:0042994	cytoplasmic sequestering of transcription factor		0.0005344	1	0.009778	0.09286	6	21	MDFI,TACC3,SUFU,TONSL,TMSB4X,PKD1
GO: Biological Process	GO:0019344	cysteine biosynthetic process		0.0005372	1	0.009804	0.09311	3	4	CBS,CBSL,CTH
GO: Biological Process	GO:0042255	ribosome assembly		0.000545	1	0.009922	0.09424	11	66	RPS2,RPS10,RPF2,MDN1,C1QBP,BOP1,PPAN,NLE1,MRPL11,RPSA,MRTO4
GO: Biological Process	GO:0072528	pyrimidine-containing compound biosynthetic process		0.0005488	1	0.009968	0.09467	10	56	ERH,NME5,SHMT1,MTOR,NME2,CAD,TAMM41,TK1,DTYMK,DUT
GO: Biological Process	GO:0001843	neural tube closure		0.0005594	1	0.01014	0.09627	15	110	RPS7,FZD1,DLC1,CC2D2A,STIL,SPINT2,MTHFD1,SUFU,CLUAP1,ARHGAP35,PFN1,CELSR1,ZIC5,FZD3,IFT57
GO: Biological Process	GO:0045333	cellular respiration		0.0005628	1	0.01017	0.09661	23	209	MDH1,MDH2,MTCO2P12,ADSL,MYBBP1A,MTFR2,ATP5F1D,LYRM7,MYC,CISD1,BLOC1S1,NDUFA4,NDUFA9,SUCLG1,NDUFB3,NDUFS6,UQCR11,CYCS,CDK1,SLC25A23,COX6C,MDH1B,TRAP1
GO: Biological Process	GO:0051220	cytoplasmic sequestering of protein		0.0005686	1	0.01023	0.09714	7	29	MDFI,TACC3,FLNA,SUFU,TONSL,TMSB4X,PKD1
GO: Biological Process	GO:0000083	regulation of transcription involved in G1/S transition of mitotic cell cycle		0.0005686	1	0.01023	0.09714	7	29	CDC45,CDC6,PCNA,FBXO5,DHFR,CDT1,E2F1
GO: Biological Process	GO:0001889	liver development		0.0005824	1	0.01045	0.09926	20	171	ACAT1,FOXM1,LSR,SOX9,ATP7A,SRD5A1,AURKA,CAD,RPGRIP1L,CIT,PCK2,PCNA,PKD1,PKM,PLAU,ITPR1,JARID2,CCDC40,KRAS,RAP1A
GO: Biological Process	GO:0030261	chromosome condensation		0.0006061	1	0.01085	0.1031	9	47	NUSAP1,SMC2,CDCA5,NCAPG,NCAPD3,NCAPH,CDK1,TOP2A,NCAPG2
GO: Biological Process	GO:0060606	tube closure		0.0006164	1	0.01101	0.1046	15	111	RPS7,FZD1,DLC1,CC2D2A,STIL,SPINT2,MTHFD1,SUFU,CLUAP1,ARHGAP35,PFN1,CELSR1,ZIC5,FZD3,IFT57
GO: Biological Process	GO:0019692	deoxyribose phosphate metabolic process		0.0006246	1	0.01113	0.1057	8	38	SHMT1,NUDT1,NTHL1,OGG1,DCTPP1,DTYMK,DUT,NUDT15
GO: Biological Process	GO:0007131	reciprocal meiotic recombination		0.0006351	1	0.01129	0.1072	10	57	BRIP1,RMI1,RAD54L,MRE11,FANCM,TOP2A,TRIP13,RAD54B,EME1,RAD51
GO: Biological Process	GO:0000375	RNA splicing, via transesterification reactions		0.0006514	1	0.01155	0.1097	36	391	RBM10,SRSF1,SRSF7,KHSRP,SRRT,FRG1,FUS,SNRPA,SNRPB,SNRPD1,SNRPF,HNRNPM,TXNL4A,RBMX,C1QBP,CSTF2T,YBX1,ZC3H10,LSM6,PSIP1,TIA1,HNRNPA1,LSM5,HNRNPA2B1,PRMT7,WDR77,POLR2L,GEMIN5,SF3B5,EIF4A3,DHX9,SNRNP25,HNRNPA3,DAZAP1,ALYREF,DDX39A
GO: Biological Process	GO:0010212	response to ionizing radiation		0.0006553	1	0.01159	0.1101	19	160	ERCC1,FANCD2,RAD54L,TICRR,MSH2,RAD51AP1,MYC,BRCA1,DDIAS,H2AX,SPIDR,RAD54B,NUCKS1,XRCC5,PRKDC,DNMT3B,RAD51,ECT2,EEF1D
GO: Biological Process	GO:0006611	protein export from nucleus		0.0006871	1	0.01213	0.1152	21	186	NUP85,SRSF1,SRSF7,GTSE1,NUP35,NDC1,SSB,NUP205,HNRNPA2B1,TXN,PKD1,XPO1,THOC6,EIF4A3,ANKLE1,ENY2,SLBP,RAN,ALYREF,EMD,DDX39A
GO: Biological Process	GO:0009200	deoxyribonucleoside triphosphate metabolic process		0.0007028	1	0.01234	0.1172	6	22	NUDT1,DCTPP1,ITPA,DTYMK,DUT,NUDT15
GO: Biological Process	GO:0001780	neutrophil homeostasis		0.0007028	1	0.01234	0.1172	6	22	MERTK,MTHFD1,AXL,HMGB1,PIK3CD,IL6
GO: Biological Process	GO:0000027	ribosomal large subunit assembly		0.0007087	1	0.01242	0.118	7	30	RPF2,MDN1,BOP1,PPAN,NLE1,MRPL11,MRTO4
GO: Biological Process	GO:1903507	negative regulation of nucleic acid-templated transcription		0.0007247	1	0.01265	0.1201	98	1370	USP9X,RBM10,JDP2,MDFI,TENM2,SNAI3,CDC45,FZD1,WWC2,MTA3,FGFR2,FOXM1,FLNA,MYBBP1A,NACC1,APBB1,PHF6,APEX1,BIRC5,PPHLN1,LYAR,SCMH1,TET1,SMARCA2,C11orf95,SUFU,MYC,SOX9,SOX15,ZMYND11,CENPJ,ATRX,SIX4,SAP30,BRCA1,TONSL,MSL3,C1QBP,CBX1,LOXL3,YWHAQ,SATB2,TCF7,YBX1,ARHGAP35,ZNF496,ORC2,PA2G4,ZNF431,PCNA,AURKB,HELLS,CENPF,ZMYND8,CBX3,HMGB1,HMGB2,FOXN3,HNRNPA2B1,HNRNPAB,TXN,HOXB4,TFCP2L1,CBY1,ZNF358,PRMT2,PLK…
GO: Biological Process	GO:0098917	retrograde trans-synaptic signaling		0.000725	1	0.01265	0.1201	5	15	ABHD6,TENM2,FABP5,NLGN1,FARP1
GO: Biological Process	GO:0061008	hepaticobiliary system development		0.0007272	1	0.01266	0.1202	20	174	ACAT1,FOXM1,LSR,SOX9,ATP7A,SRD5A1,AURKA,CAD,RPGRIP1L,CIT,PCK2,PCNA,PKD1,PKM,PLAU,ITPR1,JARID2,CCDC40,KRAS,RAP1A
GO: Biological Process	GO:0051438	regulation of ubiquitin-protein transferase activity		0.0007322	1	0.01268	0.1205	10	58	RPS2,RPS7,USP44,DCUN1D4,UBE2S,UBE2C,CDC20,PLK1,FBXO5,MAD2L1
GO: Biological Process	GO:0035825	homologous recombination		0.0007322	1	0.01268	0.1205	10	58	BRIP1,RMI1,RAD54L,MRE11,FANCM,TOP2A,TRIP13,RAD54B,EME1,RAD51
GO: Biological Process	GO:0046602	regulation of mitotic centrosome separation		0.0007379	1	0.01272	0.1208	4	9	MAP9,CHEK1,KIF11,RANBP1
GO: Biological Process	GO:1904667	negative regulation of ubiquitin protein ligase activity		0.0007379	1	0.01272	0.1208	4	9	RPS7,USP44,FBXO5,MAD2L1
GO: Biological Process	GO:0009062	fatty acid catabolic process		0.0007453	1	0.01282	0.1218	15	113	ACAT1,AKT2,MTOR,PECR,ABHD2,HADH,PCCB,PCK2,LPIN3,BDH2,IRS1,DECR1,MECR,EHHADH,ECHDC2
GO: Biological Process	GO:0007099	centriole replication		0.0007504	1	0.01288	0.1223	8	39	RBM14,STIL,CEP152,PLK4,CENPJ,BRCA1,CCP110,KIAA0753
GO: Biological Process	GO:0016569	covalent chromatin modification		0.0007545	1	0.01292	0.1227	44	512	FBL,SETD6,JDP2,ACTL6A,JADE1,TRRAP,SCML2,MTA3,RBM14,TADA3,APBB1,PPHLN1,RUVBL1,TET1,ATRX,SAP30,AURKA,BRCA1,MSL3,KMT5C,WDR5,CCNA2,CDK1,AURKB,HELLS,CHEK1,PRMT2,PRMT1,PRMT7,SMYD3,VRK1,PAF1,ATF2,KANSL1L,PCGF2,BCOR,ENY2,JARID2,USP7,DNMT3B,HDAC6,HUWE1,TRIM28,KDM8
GO: Biological Process	GO:1902679	negative regulation of RNA biosynthetic process		0.0007602	1	0.01299	0.1234	98	1372	USP9X,RBM10,JDP2,MDFI,TENM2,SNAI3,CDC45,FZD1,WWC2,MTA3,FGFR2,FOXM1,FLNA,MYBBP1A,NACC1,APBB1,PHF6,APEX1,BIRC5,PPHLN1,LYAR,SCMH1,TET1,SMARCA2,C11orf95,SUFU,MYC,SOX9,SOX15,ZMYND11,CENPJ,ATRX,SIX4,SAP30,BRCA1,TONSL,MSL3,C1QBP,CBX1,LOXL3,YWHAQ,SATB2,TCF7,YBX1,ARHGAP35,ZNF496,ORC2,PA2G4,ZNF431,PCNA,AURKB,HELLS,CENPF,ZMYND8,CBX3,HMGB1,HMGB2,FOXN3,HNRNPA2B1,HNRNPAB,TXN,HOXB4,TFCP2L1,CBY1,ZNF358,PRMT2,PLK…
GO: Biological Process	GO:0048598	embryonic morphogenesis		0.0007938	1	0.01353	0.1285	55	681	ABR,RPS7,MDFI,FZD1,DLC1,RACK1,CC2D2A,FGFR2,FLVCR1,STIL,WDR19,SPINT2,MTHFD1,SUFU,SOD1,MYC,SOX4,SOX9,CLUAP1,SIX4,BMPR1A,GPI,SATB2,TCF7,RPGRIP1L,ARHGAP35,GRSF1,EXOC4,PFN1,HOXB4,ZNF358,PAF1,CRABP2,CELSR1,ZIC5,RBPJ,PRKAR1A,MYADM,PCGF2,ACD,EIF4A3,TMEM231,TCTN1,CCDC40,FZD3,IFT57,DYNC2H1,DNAJB6,WDPCP,IFT52,MEGF8,TRIM28,BBS7,LRP5,IRX2
GO: Biological Process	GO:0042274	ribosomal small subunit biogenesis		0.0008031	1	0.01366	0.1297	11	69	RPS2,RPS7,RPS10,EMG1,TBL3,TSR1,LSM6,MRPS9,BMS1,RPSA,HEATR1
GO: Biological Process	GO:0007368	determination of left/right symmetry		0.0008153	1	0.01383	0.1314	17	138	CC2D2A,IFT74,STIL,GALNT11,SUFU,CLUAP1,RPGRIP1L,DAAM2,TMEM67,DPCD,RBPJ,CCDC40,IFT57,DYNC2H1,IFT52,MEGF8,BBS7
GO: Biological Process	GO:2000779	regulation of double-strand break repair		0.0008289	1	0.014	0.133	12	80	FANCB,FOXM1,RAD51AP1,FUS,OGG1,SPIDR,CHEK1,AUNIP,RMI2,PRKDC,RAD51,WRAP53
GO: Biological Process	GO:1901292	nucleoside phosphate catabolic process		0.0008289	1	0.014	0.133	12	80	ACAT1,NUDT1,NTHL1,OGG1,PDE4A,PDE7A,HPRT1,DCTPP1,ITPA,ENPP5,DUT,NUDT15
GO: Biological Process	GO:0060562	epithelial tube morphogenesis		0.0008584	1	0.01447	0.1374	36	397	SPRY1,RPS7,FZD1,DLC1,CC2D2A,FGFR2,ANGPT1,STIL,SPINT2,MTHFD1,SUFU,MYC,SOX4,SOX9,CLUAP1,SIX4,ARHGAP35,TMEM67,PFN1,PKD1,CELSR1,ZIC5,RBPJ,CTSV,PRKX,CCM2,TCTN1,CCDC40,KRAS,FZD3,IFT57,IFT52,MEGF8,BBS7,LRP5,IRX2
GO: Biological Process	GO:0071826	ribonucleoprotein complex subunit organization		0.0008941	1	0.01501	0.1425	29	298	RPS2,RPS10,NUFIP1,MCTS2P,NAF1,RPF2,TICRR,SRSF1,RUVBL1,EIF3B,SNRPB,SNRPD1,SNRPF,MDN1,TXNL4A,RBMX,C1QBP,BOP1,PSIP1,PPAN,NLE1,PRMT7,WDR77,GEMIN5,MRPL11,DHX9,RPSA,G3BP1,MRTO4
GO: Biological Process	GO:0060236	regulation of mitotic spindle organization		0.0008959	1	0.01501	0.1425	8	40	MAP9,SMC1A,TACC3,TPX2,PSRC1,PKD1,PLK1,DCTN1
GO: Biological Process	GO:0021510	spinal cord development		0.0008964	1	0.01501	0.1425	15	115	ERCC2,ACTL6A,MTOR,SUFU,SOX4,SOX12,SRD5A1,ZC4H2,LOXL3,DAAM2,PKD1,DCTN1,TCTN1,DYNC2H1,GDF11
GO: Biological Process	GO:0009147	pyrimidine nucleoside triphosphate metabolic process		0.0009094	1	0.01519	0.1443	6	23	NME5,NME2,CAD,DCTPP1,DTYMK,DUT
GO: Biological Process	GO:0007050	cell cycle arrest		0.0009516	1	0.01586	0.1506	25	244	RRAGB,AKT2,FOXM1,MYBBP1A,GTSE1,APBB1,MSH2,GADD45GIP1,MTOR,MYC,SOX4,AURKA,BRCA1,CDC123,DDIAS,CDK1,PCNA,CDKN2C,CDKN3,PKD1,PRMT1,PPM1G,DAB2IP,DHCR24,E2F1
GO: Biological Process	GO:0006415	translational termination		0.0009608	1	0.01598	0.1517	14	104	MRPL23,MRPS17,MRPL13,MRPL28,GADD45GIP1,GSPT1,GSPT2,MRPS26,MRPS9,MRPL36,MRPL11,MRPL1,MRPL16,MRPL4
GO: Biological Process	GO:0071426	ribonucleoprotein complex export from nucleus		0.000979	1	0.01624	0.1543	16	128	NUP85,SRSF1,SRSF7,NUP35,NDC1,SSB,NUP205,HNRNPA2B1,XPO1,THOC6,EIF4A3,ENY2,SLBP,RAN,ALYREF,DDX39A
GO: Biological Process	GO:0006006	glucose metabolic process		0.0009817	1	0.01625	0.1544	24	231	MDH1,MDH2,FABP5,NLN,AKT2,MTOR,MYC,GAPDH,GPI,GRB10,WDR5,SLC35B4,PC,PCK2,HMGB1,PGAM1,PKM,SLC45A3,IL6,GALM,IRS1,LDHA,LRP5,ENO1
GO: Biological Process	GO:0002009	morphogenesis of an epithelium		0.0009885	1	0.01633	0.1551	52	641	SPRY1,RPS7,FZD1,FZD4,DLC1,CC2D2A,FGFR2,FLNA,ANGPT1,STIL,MSN,SPINT2,MTHFD1,MTOR,SUFU,MYC,SOX4,SOX9,CLUAP1,ATP7A,MYO9A,SIX4,PSME4,RPGRIP1L,ARHGAP35,GRSF1,PARD3,TMEM67,PFN1,HOXB4,PKD1,CELSR1,ZIC5,RBPJ,CTSV,PRKX,IL6,PSMA2,PSMD3,CCM2,TCTN1,CCDC40,KRAS,FZD3,IFT57,IFT52,CELSR3,MEGF8,TRIM28,BBS7,LRP5,IRX2
GO: Biological Process	GO:0006119	oxidative phosphorylation		0.001002	1	0.0165	0.1567	18	153	MTCO2P12,MSH2,GADD45GIP1,ATP5F1D,MYC,ATP5MC1,ATP5MC3,ATP7A,ATP5PO,NDUFA4,NDUFA9,NDUFB3,NDUFS6,UQCR11,CYCS,CDK1,SLC25A23,COX6C
GO: Biological Process	GO:0050667	homocysteine metabolic process		0.00101	1	0.0165	0.1567	5	16	MTHFD1,CBS,TST,CBSL,CTH
GO: Biological Process	GO:0051382	kinetochore assembly		0.00101	1	0.0165	0.1567	5	16	CENPW,CENPN,CENPK,CENPF,CENPH
GO: Biological Process	GO:0051081	nuclear envelope disassembly		0.00101	1	0.0165	0.1567	5	16	CCNB2,CDK1,PLK1,VRK1,DCTN1
GO: Biological Process	GO:0030397	membrane disassembly		0.00101	1	0.0165	0.1567	5	16	CCNB2,CDK1,PLK1,VRK1,DCTN1
GO: Biological Process	GO:0046034	ATP metabolic process		0.001032	1	0.01682	0.1597	31	329	NUP85,MTCO2P12,MPI,MSH2,GADD45GIP1,NUP35,NDC1,ATP1B1,ATP5F1D,MYC,ATP5MC1,ATP5MC3,ATP7A,ATP5PO,GAPDH,NDUFA4,NDUFA9,NDUFB3,NDUFS6,NUP205,UQCR11,GPI,CYCS,TMSB4X,CDK1,PGAM1,PKM,SLC25A23,COX6C,LDHA,ENO1
GO: Biological Process	GO:0009163	nucleoside biosynthetic process		0.001063	1	0.01725	0.1638	8	41	NME5,APRT,NME2,CAD,TK1,HPRT1,IMPDH2,DTYMK
GO: Biological Process	GO:0009262	deoxyribonucleotide metabolic process		0.001063	1	0.01725	0.1638	8	41	SHMT1,NUDT1,NTHL1,OGG1,DCTPP1,DTYMK,DUT,NUDT15
GO: Biological Process	GO:0071166	ribonucleoprotein complex localization		0.001065	1	0.01725	0.1638	16	129	NUP85,SRSF1,SRSF7,NUP35,NDC1,SSB,NUP205,HNRNPA2B1,XPO1,THOC6,EIF4A3,ENY2,SLBP,RAN,ALYREF,DDX39A
GO: Biological Process	GO:1902751	positive regulation of cell cycle G2/M phase transition		0.00107	1	0.0173	0.1643	7	32	ATAD5,MTA3,DTL,CDK1,CDC25A,FBXO5,LMNB1
GO: Biological Process	GO:0014020	primary neural tube formation		0.001073	1	0.0173	0.1643	15	117	RPS7,FZD1,DLC1,CC2D2A,STIL,SPINT2,MTHFD1,SUFU,CLUAP1,ARHGAP35,PFN1,CELSR1,ZIC5,FZD3,IFT57
GO: Biological Process	GO:0000377	RNA splicing, via transesterification reactions with bulged adenosine as nucleophile		0.001102	1	0.01769	0.168	35	388	RBM10,SRSF1,SRSF7,SRRT,FRG1,FUS,SNRPA,SNRPB,SNRPD1,SNRPF,HNRNPM,TXNL4A,RBMX,C1QBP,CSTF2T,YBX1,ZC3H10,LSM6,PSIP1,TIA1,HNRNPA1,LSM5,HNRNPA2B1,PRMT7,WDR77,POLR2L,GEMIN5,SF3B5,EIF4A3,DHX9,SNRNP25,HNRNPA3,DAZAP1,ALYREF,DDX39A
GO: Biological Process	GO:0000398	mRNA splicing, via spliceosome		0.001102	1	0.01769	0.168	35	388	RBM10,SRSF1,SRSF7,SRRT,FRG1,FUS,SNRPA,SNRPB,SNRPD1,SNRPF,HNRNPM,TXNL4A,RBMX,C1QBP,CSTF2T,YBX1,ZC3H10,LSM6,PSIP1,TIA1,HNRNPA1,LSM5,HNRNPA2B1,PRMT7,WDR77,POLR2L,GEMIN5,SF3B5,EIF4A3,DHX9,SNRNP25,HNRNPA3,DAZAP1,ALYREF,DDX39A
GO: Biological Process	GO:0051653	spindle localization		0.001124	1	0.01801	0.171	9	51	NUSAP1,SPRY1,NDC80,SPAG5,PLK1,ESPL1,NDE1,DCTN1,MAD2L1
GO: Biological Process	GO:0007064	mitotic sister chromatid cohesion		0.00116	1	0.0185	0.1757	6	24	SMC1A,CDCA5,ATRX,CDC20,PTTG1,DSCC1
GO: Biological Process	GO:0006297	nucleotide-excision repair, DNA gap filling		0.00116	1	0.0185	0.1757	6	24	PCNA,POLD1,RFC4,RFC5,LIG1,RPA3
GO: Biological Process	GO:0045842	positive regulation of mitotic metaphase/anaphase transition		0.001179	1	0.01874	0.178	4	10	ANAPC4,ESPL1,DLGAP5,CDT1
GO: Biological Process	GO:1901970	positive regulation of mitotic sister chromatid separation		0.001179	1	0.01874	0.178	4	10	ANAPC4,ESPL1,DLGAP5,CDT1
GO: Biological Process	GO:0015931	nucleobase-containing compound transport		0.001199	1	0.01901	0.1805	25	248	NUP85,SRSF1,SRSF7,NUP35,KHSRP,NDC1,SSB,NUP205,SLC35B4,CETN3,TST,HNRNPA1,HNRNPA2B1,SLC25A23,XPO1,THOC6,EIF4A3,ENY2,DHX9,SLBP,RAN,HNRNPA3,LRPPRC,ALYREF,DDX39A
GO: Biological Process	GO:0015986	ATP synthesis coupled proton transport		0.001254	1	0.01976	0.1877	18	156	MTCO2P12,MSH2,GADD45GIP1,ATP5F1D,MYC,ATP5MC1,ATP5MC3,ATP7A,ATP5PO,NDUFA4,NDUFA9,NDUFB3,NDUFS6,UQCR11,CYCS,CDK1,SLC25A23,COX6C
GO: Biological Process	GO:0015985	energy coupled proton transport, down electrochemical gradient		0.001254	1	0.01976	0.1877	18	156	MTCO2P12,MSH2,GADD45GIP1,ATP5F1D,MYC,ATP5MC1,ATP5MC3,ATP7A,ATP5PO,NDUFA4,NDUFA9,NDUFB3,NDUFS6,UQCR11,CYCS,CDK1,SLC25A23,COX6C
GO: Biological Process	GO:0098534	centriole assembly		0.001254	1	0.01976	0.1877	8	42	RBM14,STIL,CEP152,PLK4,CENPJ,BRCA1,CCP110,KIAA0753
GO: Biological Process	GO:0030382	sperm mitochondrion organization		0.00129	1	0.02007	0.1906	3	5	DDHD1,NECTIN2,NSUN7
GO: Biological Process	GO:0097350	neutrophil clearance		0.00129	1	0.02007	0.1906	3	5	MERTK,AXL,HMGB1
GO: Biological Process	GO:0051754	meiotic sister chromatid cohesion, centromeric		0.00129	1	0.02007	0.1906	3	5	BUB1,BUB1B,SGO2
GO: Biological Process	GO:0072757	cellular response to camptothecin		0.00129	1	0.02007	0.1906	3	5	FANCB,SPIDR,RAD51
GO: Biological Process	GO:0098942	retrograde trans-synaptic signaling by trans-synaptic protein complex		0.00129	1	0.02007	0.1906	3	5	TENM2,NLGN1,FARP1
GO: Biological Process	GO:0006402	mRNA catabolic process		0.001293	1	0.02007	0.1906	34	377	RIDA,RPL34,RPL36A,RPS2,RBM10,RPS7,RPS10,APEX1,KHSRP,MTOR,HNRNPM,SSB,PSME4,TNRC6A,YBX1,LARP1,GSPT1,LSM6,EXOSC8,LSM5,GSPT2,XPO1,SERBP1,EIF4A3,PSMA2,PSMD3,DHX9,E2F1,RPSA,TOB1,MRTO4,RPL7,RPL8,RPL17
GO: Biological Process	GO:0007004	telomere maintenance via telomerase		0.001298	1	0.02007	0.1906	11	73	NAF1,MRE11,CCT7,CCT5,AURKB,HNRNPA1,XRCC5,ACD,TELO2,PINX1,WRAP53
GO: Biological Process	GO:1905324	telomere-telomerase complex assembly		0.001298	1	0.02007	0.1906	11	73	NAF1,MRE11,CCT7,CCT5,AURKB,HNRNPA1,XRCC5,ACD,TELO2,PINX1,WRAP53
GO: Biological Process	GO:0008608	attachment of spindle microtubules to kinetochore		0.001298	1	0.02007	0.1906	7	33	NDC80,SPAG5,KIF2C,AURKB,NUF2,CDT1,ECT2
GO: Biological Process	GO:0006266	DNA ligation		0.00137	1	0.02109	0.2003	5	17	TOP2A,HMGB1,HMGB2,RAD51,LIG1
GO: Biological Process	GO:0034501	protein localization to kinetochore		0.00137	1	0.02109	0.2003	5	17	NDC80,CDK1,AURKB,TTK,CDT1
GO: Biological Process	GO:0051289	protein homotetramerization		0.001394	1	0.02142	0.2035	14	108	MAT1A,SHMT1,GAPDH,CBR4,TK1,HSD17B10,CBY1,HPRT1,PKM,DCTPP1,CTH,IMPDH2,ITPR1,DECR1
GO: Biological Process	GO:0043624	cellular protein complex disassembly		0.001398	1	0.02144	0.2036	24	237	MRPL23,KIF18A,F2RL1,ADD3,MRPS17,CAMSAP1,MRPL13,MRPL28,SHROOM2,GADD45GIP1,SPTBN1,KIF2C,GSPT1,TWF2,GSPT2,MRPS26,MRPS9,MRPL36,MRPL11,MRPL1,MRPL16,HDAC6,MRPL4,CKAP2
GO: Biological Process	GO:1902579	multi-organism localization		0.001454	1	0.02221	0.2109	11	74	NUP85,NUP35,NDC1,NUP205,XPO1,THOC6,KPNA2,KPNA3,RAN,ALYREF,VPS28
GO: Biological Process	GO:0044766	multi-organism transport		0.001454	1	0.02221	0.2109	11	74	NUP85,NUP35,NDC1,NUP205,XPO1,THOC6,KPNA2,KPNA3,RAN,ALYREF,VPS28
GO: Biological Process	GO:0019674	NAD metabolic process		0.001492	1	0.02272	0.2158	9	53	MDH1,GAPDH,GPI,PCK2,PGAM1,PKM,LDHA,LDHB,ENO1
GO: Biological Process	GO:0019080	viral gene expression		0.001494	1	0.02272	0.2158	22	211	RPL34,RPL36A,NUP85,RPS2,RPS7,RPS10,NUP35,NDC1,TRIM32,EIF3B,SSB,NUP205,TOP2A,PFN1,NUCKS1,POLR2L,DHX9,RPSA,TRIM28,RPL7,RPL8,RPL17
GO: Biological Process	GO:0043648	dicarboxylic acid metabolic process		0.001525	1	0.02315	0.2198	14	109	MDH1,MDH2,SHMT1,MTHFD1,ATIC,SUCLG1,GLUD1,ACSF3,OAT,PC,PCK2,DHFR,MDH1B,ALDH18A1
GO: Biological Process	GO:0032212	positive regulation of telomere maintenance via telomerase		0.001562	1	0.02367	0.2248	7	34	NAF1,CCT7,CCT5,AURKB,HNRNPA1,XRCC5,ACD
GO: Biological Process	GO:0046822	regulation of nucleocytoplasmic transport		0.001645	1	0.02487	0.2362	15	122	FLNA,ANGPT1,GTSE1,FERMT1,SUFU,TXN,EI24,XPO1,PPP1CC,DHX9,IPO5,RAN,ECT2,TRIM28,EMD
GO: Biological Process	GO:0051170	import into nucleus		0.001659	1	0.02503	0.2378	20	186	NUP85,FLNA,ANGPT1,FERMT1,NUP35,SNRPB,SUFU,SNRPD1,SNRPF,POLA2,HNRNPA1,EI24,GEMIN5,HEATR3,KPNA2,KPNA3,IPO5,RAN,ECT2,TRIM28
GO: Biological Process	GO:0120034	positive regulation of plasma membrane bounded cell projection assembly		0.001666	1	0.02508	0.2382	14	110	F2RL1,TENM2,ZMYND10,NLGN1,MTOR,ATP7A,CENPJ,ARHGAP35,TMEM67,ZMYND8,TWF2,PFN1,CCP110,ESPN
GO: Biological Process	GO:0010824	regulation of centrosome duplication		0.001719	1	0.02582	0.2453	8	44	RBM14,STIL,PLK4,CENPJ,BRCA1,CCNF,TMEM67,XPO1
GO: Biological Process	GO:1900182	positive regulation of protein localization to nucleus		0.001751	1	0.02626	0.2494	12	87	FLNA,GTSE1,CCT7,CCT5,HNRNPM,CDK1,PLK1,PINX1,IPO5,RAN,ECT2,TRIM28
GO: Biological Process	GO:0009855	determination of bilateral symmetry		0.001775	1	0.02655	0.2522	17	148	CC2D2A,IFT74,STIL,GALNT11,SUFU,CLUAP1,RPGRIP1L,DAAM2,TMEM67,DPCD,RBPJ,CCDC40,IFT57,DYNC2H1,IFT52,MEGF8,BBS7
GO: Biological Process	GO:1902101	positive regulation of metaphase/anaphase transition of cell cycle		0.001777	1	0.02655	0.2522	4	11	ANAPC4,ESPL1,DLGAP5,CDT1
GO: Biological Process	GO:0072594	establishment of protein localization to organelle		0.001791	1	0.0267	0.2536	49	612	RPL34,RPL36A,NUP85,RPS2,USP9X,RPS7,RPS10,MIPEP,LRRC7,TIMM44,FLNA,ANGPT1,FERMT1,CCT7,NUP35,TIMM21,CCT5,SUFU,SORL1,PECR,YWHAQ,SPIDR,POLA2,FBXO7,SGTB,PACSIN1,GNPTAB,EI24,YWHAH,GCC2,ACD,HEATR3,KPNA2,KPNA3,IPO5,RAN,E2F1,RPSA,HUWE1,WRAP53,ECT2,TIMM10,TRAM1L1,EHHADH,TRIM28,VPS28,RPL7,RPL8,RPL17
GO: Biological Process	GO:1901976	regulation of cell cycle checkpoint		0.001867	1	0.02777	0.2638	7	35	USP44,NDC80,CUL4A,AURKA,CDT1,DYNC1LI1,MAD2L1
GO: Biological Process	GO:0009799	specification of symmetry		0.001909	1	0.02831	0.2689	17	149	CC2D2A,IFT74,STIL,GALNT11,SUFU,CLUAP1,RPGRIP1L,DAAM2,TMEM67,DPCD,RBPJ,CCDC40,IFT57,DYNC2H1,IFT52,MEGF8,BBS7
GO: Biological Process	GO:0035107	appendage morphogenesis		0.001914	1	0.02831	0.2689	19	175	FAM92A,FGFR2,FLVCR1,WDR19,SOX4,SOX9,ATP7A,ATRX,BMPR1A,RPGRIP1L,ZNF358,CRABP2,ACD,TMEM231,DYNC2H1,WDPCP,IFT52,MEGF8,LRP5
GO: Biological Process	GO:0035108	limb morphogenesis		0.001914	1	0.02831	0.2689	19	175	FAM92A,FGFR2,FLVCR1,WDR19,SOX4,SOX9,ATP7A,ATRX,BMPR1A,RPGRIP1L,ZNF358,CRABP2,ACD,TMEM231,DYNC2H1,WDPCP,IFT52,MEGF8,LRP5
GO: Biological Process	GO:0016570	histone modification		0.001923	1	0.02838	0.2696	41	491	FBL,SETD6,JDP2,ACTL6A,JADE1,TRRAP,SCML2,MTA3,RBM14,TADA3,APBB1,RUVBL1,TET1,ATRX,SAP30,AURKA,BRCA1,MSL3,KMT5C,WDR5,CCNA2,CDK1,AURKB,CHEK1,PRMT2,PRMT1,PRMT7,SMYD3,VRK1,PAF1,ATF2,KANSL1L,PCGF2,BCOR,ENY2,JARID2,USP7,DNMT3B,HDAC6,HUWE1,KDM8
GO: Biological Process	GO:1901659	glycosyl compound biosynthetic process		0.001997	1	0.02941	0.2793	8	45	NME5,APRT,NME2,CAD,TK1,HPRT1,IMPDH2,DTYMK
GO: Biological Process	GO:0072329	monocarboxylic acid catabolic process		0.002012	1	0.02958	0.2809	16	137	ACAT1,AKT2,MTOR,PECR,ABHD2,HADH,PCCB,PCK2,LPIN3,CYP26A1,BDH2,IRS1,DECR1,MECR,EHHADH,ECHDC2
GO: Biological Process	GO:0006353	DNA-templated transcription, termination		0.002018	1	0.02962	0.2813	11	77	ERCC2,POLR1B,TTF2,XRN2,SNRPB,SNRPF,CSTF2T,POLR1A,POLR2L,DHX9,SLBP
GO: Biological Process	GO:0045892	negative regulation of transcription, DNA-templated		0.002096	1	0.03059	0.2905	92	1316	USP9X,RBM10,JDP2,MDFI,TENM2,SNAI3,CDC45,FZD1,WWC2,MTA3,FGFR2,FOXM1,FLNA,MYBBP1A,NACC1,APBB1,PHF6,BIRC5,PPHLN1,LYAR,SCMH1,TET1,SMARCA2,C11orf95,SUFU,MYC,SOX9,SOX15,ZMYND11,ATRX,SIX4,SAP30,BRCA1,MSL3,C1QBP,CBX1,LOXL3,YWHAQ,SATB2,TCF7,YBX1,ARHGAP35,ZNF496,ORC2,PA2G4,ZNF431,PCNA,AURKB,HELLS,CENPF,CBX3,HMGB1,HMGB2,FOXN3,HNRNPA2B1,HNRNPAB,TXN,HOXB4,TFCP2L1,CBY1,ZNF358,PRMT2,PLK1,EID2,XPO1,PAF1,XRCC5,AT…
GO: Biological Process	GO:2000278	regulation of DNA biosynthetic process		0.002097	1	0.03059	0.2905	15	125	NAF1,CCT7,CCT5,MYC,AURKB,CHEK1,HNRNPA1,HNRNPA2B1,DSCC1,XRCC5,ACD,PINX1,WRAP53,RFC4,RFC5
GO: Biological Process	GO:0009063	cellular amino acid catabolic process		0.002097	1	0.03059	0.2905	15	125	RIDA,ACAT1,MAT1A,AFMID,SHMT1,ALDH7A1,BCAT1,GLDC,GLUD1,OAT,CBS,HSD17B10,CARNMT1,TST,CTH
GO: Biological Process	GO:0070126	mitochondrial translational termination		0.002132	1	0.03098	0.2942	12	89	MRPL23,MRPS17,MRPL13,MRPL28,GADD45GIP1,MRPS26,MRPS9,MRPL36,MRPL11,MRPL1,MRPL16,MRPL4
GO: Biological Process	GO:0070125	mitochondrial translational elongation		0.002132	1	0.03098	0.2942	12	89	MRPL23,MRPS17,MRPL13,MRPL28,GADD45GIP1,MRPS26,MRPS9,MRPL36,MRPL11,MRPL1,MRPL16,MRPL4
GO: Biological Process	GO:0019318	hexose metabolic process		0.002174	1	0.03153	0.2995	26	273	MDH1,MDH2,FABP5,NLN,AKT2,MPI,FUOM,MTOR,MYC,GAPDH,GPI,GRB10,WDR5,SLC35B4,PC,PCK2,HMGB1,PGAM1,PKM,SLC45A3,IL6,GALM,IRS1,LDHA,LRP5,ENO1
GO: Biological Process	GO:0002478	antigen processing and presentation of exogenous peptide antigen		0.002182	1	0.03158	0.2999	19	177	KIF18A,PSME4,KIF2C,DCTN3,HLA-B,HLA-DQB1,HLA-DRB5,AP1S1,KIF23,CTSV,PSMA2,KIF4A,PSMD3,DCTN1,KIF15,KIF11,KIF22,AP1M2,DYNC1LI1
GO: Biological Process	GO:0051973	positive regulation of telomerase activity		0.002215	1	0.032	0.3039	7	36	NAF1,MYC,AURKB,HNRNPA2B1,XRCC5,ACD,WRAP53
GO: Biological Process	GO:0048820	hair follicle maturation		0.002233	1	0.03219	0.3057	6	27	ERCC2,FERMT1,CDH3,RBPJ,CTSV,NSUN2
GO: Biological Process	GO:0010464	regulation of mesenchymal cell proliferation		0.002309	1	0.0331	0.3144	8	46	FGFR2,MYC,SOX9,BMPR1A,HMGB1,PHF14,IRS1,LRP5
GO: Biological Process	GO:0006221	pyrimidine nucleotide biosynthetic process		0.002309	1	0.0331	0.3144	8	46	ERH,NME5,SHMT1,NME2,CAD,TAMM41,DTYMK,DUT
GO: Biological Process	GO:0010569	regulation of double-strand break repair via homologous recombination		0.002309	1	0.0331	0.3144	8	46	FANCB,RAD51AP1,FUS,SPIDR,CHEK1,RMI2,RAD51,WRAP53
GO: Biological Process	GO:0009116	nucleoside metabolic process		0.002342	1	0.03339	0.3171	14	114	ERH,NME5,MAGI3,APRT,CARD11,ATIC,NME2,CAD,TK1,HPRT1,IMPDH2,PYCR3,RAN,DTYMK
GO: Biological Process	GO:0009060	aerobic respiration		0.002347	1	0.03339	0.3171	12	90	MDH1,MDH2,MTCO2P12,ADSL,MTFR2,ATP5F1D,BLOC1S1,NDUFA4,SUCLG1,CYCS,COX6C,MDH1B
GO: Biological Process	GO:0090670	RNA localization to Cajal body		0.00236	1	0.03339	0.3171	5	19	NAF1,CCT7,RUVBL1,CCT5,WRAP53
GO: Biological Process	GO:0033151	V(D)J recombination		0.00236	1	0.03339	0.3171	5	19	TCF7,HMGB1,HMGB2,PRKDC,LIG1
GO: Biological Process	GO:0090685	RNA localization to nucleus		0.00236	1	0.03339	0.3171	5	19	NAF1,CCT7,RUVBL1,CCT5,WRAP53
GO: Biological Process	GO:0090672	telomerase RNA localization		0.00236	1	0.03339	0.3171	5	19	NAF1,CCT7,RUVBL1,CCT5,WRAP53
GO: Biological Process	GO:0090671	telomerase RNA localization to Cajal body		0.00236	1	0.03339	0.3171	5	19	NAF1,CCT7,RUVBL1,CCT5,WRAP53
GO: Biological Process	GO:0044087	regulation of cellular component biogenesis		0.002431	1	0.03433	0.326	75	1040	TBC1D19,ERCC1,ERCC2,SMC1A,HJURP,F2RL1,TENM2,ADD3,TBC1D24,FZD1,DLC1,RACK1,ZMYND10,RBM14,FES,CAMSAP1,CUL4A,FLNA,PPM1E,ARFGEF1,NLGN1,STIL,SPAG5,PDLIM4,MSN,ARL2,MTOR,PLK4,SORL1,SOX9,ATP7A,CENPJ,SPTBN1,TOGARAM1,SIX4,WDR43,BIK,DIMT1,BRCA1,PSRC1,ICE1,ARHGAP35,ODF2,TJP1,TMSB4X,SPIDR,TMEM67,CORO1C,ZMYND8,HMGB1,TWF2,PFN1,PLK1,XRCC5,LRRN3,ARHGEF10,DAB2IP,CCP110,MYADM,DHX33,DCTN1,SACS,CDT1,ESPN,RAP1A,HDAC6,S…
GO: Biological Process	GO:0009146	purine nucleoside triphosphate catabolic process		0.00248	1	0.03437	0.3264	3	6	NUDT1,ITPA,NUDT15
GO: Biological Process	GO:0006561	proline biosynthetic process		0.00248	1	0.03437	0.3264	3	6	OAT,ALDH18A1,PYCR3
GO: Biological Process	GO:0000912	assembly of actomyosin apparatus involved in cytokinesis		0.00248	1	0.03437	0.3264	3	6	RTKN,KIF23,ECT2
GO: Biological Process	GO:0000915	actomyosin contractile ring assembly		0.00248	1	0.03437	0.3264	3	6	RTKN,KIF23,ECT2
GO: Biological Process	GO:0045875	negative regulation of sister chromatid cohesion		0.00248	1	0.03437	0.3264	3	6	ATRX,RECQL4,ESPL1
GO: Biological Process	GO:0070814	hydrogen sulfide biosynthetic process		0.00248	1	0.03437	0.3264	3	6	CBS,CBSL,CTH
GO: Biological Process	GO:0055129	L-proline biosynthetic process		0.00248	1	0.03437	0.3264	3	6	OAT,ALDH18A1,PYCR3
GO: Biological Process	GO:0031536	positive regulation of exit from mitosis		0.00248	1	0.03437	0.3264	3	6	BIRC5,CDCA5,UBE2C
GO: Biological Process	GO:1901563	response to camptothecin		0.00248	1	0.03437	0.3264	3	6	FANCB,SPIDR,RAD51
GO: Biological Process	GO:0010032	meiotic chromosome condensation		0.00248	1	0.03437	0.3264	3	6	SMC2,NCAPD3,NCAPH
GO: Biological Process	GO:0075733	intracellular transport of virus		0.002517	1	0.03473	0.3299	9	57	NUP85,NUP35,NDC1,NUP205,XPO1,KPNA2,KPNA3,RAN,VPS28
GO: Biological Process	GO:0009451	RNA modification		0.00252	1	0.03473	0.3299	18	166	FBL,MRM1,NAF1,EMG1,OSGEP,RPUSD1,SEPHS1,PUS1,WDR4,SSB,DIMT1,GTPBP3,HSD17B10,METTL2A,PUS7,NSUN2,TRDMT1,TFB1M
GO: Biological Process	GO:0031123	RNA 3'-end processing		0.002533	1	0.03473	0.3299	17	153	FBL,SRSF1,SRSF7,SNRPA,SSB,CSTF2T,GRSF1,HSD17B10,EXOSC8,PAF1,THOC6,PTCD1,EIF4A3,SLBP,LIN28A,ALYREF,DDX39A
GO: Biological Process	GO:0044403	symbiotic process		0.002556	1	0.03473	0.3299	67	911	ERCC2,RPL34,RPL36A,NUP85,RPS2,RPS7,RPS10,F2RL1,TRIM59,RACK1,CUL4A,MRE11,MAGI3,GADD45GIP1,NUP35,MSN,NDC1,TRIM32,EIF3B,MYC,ZMYND11,GAPDH,AXL,SSB,NUP205,SUGT1,BUB1,C1QBP,LARP1,CCNA2,PSIP1,H2AX,CDK1,PC,TOP2A,PCNA,PFN1,HNRNPA1,AP1S1,NUCKS1,PLCG1,POLR2L,XPO1,XRCC5,PPIA,THOC6,ILF3,DHX9,NECTIN2,USP7,KPNA2,KPNA3,IPO5,RAN,RANBP1,CENPU,AP1M2,RPSA,G3BP1,ABI2,TRIM28,DYNC1LI1,ALYREF,VPS28,RPL7,RPL8,RPL17
GO: Biological Process	GO:0010826	negative regulation of centrosome duplication		0.002557	1	0.03473	0.3299	4	12	RBM14,BRCA1,CCNF,TMEM67
GO: Biological Process	GO:0007077	mitotic nuclear envelope disassembly		0.002557	1	0.03473	0.3299	4	12	CCNB2,CDK1,PLK1,VRK1
GO: Biological Process	GO:1904668	positive regulation of ubiquitin protein ligase activity		0.002557	1	0.03473	0.3299	4	12	UBE2S,UBE2C,CDC20,PLK1
GO: Biological Process	GO:0070202	regulation of establishment of protein localization to chromosome		0.002557	1	0.03473	0.3299	4	12	CCT7,CCT5,SPIDR,WRAP53
GO: Biological Process	GO:0006563	L-serine metabolic process		0.002557	1	0.03473	0.3299	4	12	SHMT1,CBS,CBSL,PSPH
GO: Biological Process	GO:0019042	viral latency		0.002557	1	0.03473	0.3299	4	12	PSIP1,NUCKS1,XRCC5,PPIA
GO: Biological Process	GO:1905820	positive regulation of chromosome separation		0.002557	1	0.03473	0.3299	4	12	ANAPC4,ESPL1,DLGAP5,CDT1
GO: Biological Process	GO:0032465	regulation of cytokinesis		0.002578	1	0.03495	0.332	12	91	MAP9,AURKA,CIT,CDC6,AURKB,PLK1,KIF23,CCP110,INCENP,ECT2,KIF20A,CSPP1
GO: Biological Process	GO:0006007	glucose catabolic process		0.002612	1	0.03534	0.3356	7	37	GAPDH,GPI,PGAM1,PKM,LDHA,LRP5,ENO1
GO: Biological Process	GO:0080135	regulation of cellular response to stress		0.002641	1	0.03567	0.3388	61	815	ERCC1,NUP85,ATAD5,MDFI,F2RL1,TBC1D24,FZD1,FZD4,FANCB,RACK1,NME5,FOXM1,CUL4A,APBB1,MAGI3,NUP35,RAD51AP1,NDC1,TRIM32,MTOR,FUS,MAP3K21,SOD1,MYC,ZMYND11,NUP205,BMPR1A,BRCA1,NSMCE1,OGG1,CBS,DDIAS,H2AX,SPIDR,PCNA,TMEM67,HMGB1,CHEK1,TXN,AUNIP,FBXO7,PRMT1,SLC25A23,RMI2,PRKDC,DAB2IP,ANKLE1,DHX9,FBXO5,DHFR,RAD51,KRAS,HDAC6,DNAJB6,WRAP53,TRAP1,LMNB1,TRIM28,STEAP3,ENO1,RPA3
GO: Biological Process	GO:0031109	microtubule polymerization or depolymerization		0.002648	1	0.03571	0.3391	15	128	KIF18A,FES,CAMSAP1,ARL2,CENPJ,TOGARAM1,PSRC1,KIF2C,SKA1,NDE1,DCTN1,FBXO5,HDAC6,CKAP2,SKA3
GO: Biological Process	GO:0070316	regulation of G0 to G1 transition		0.002658	1	0.03577	0.3398	8	47	SOX15,BRCA1,CBX3,CHEK1,DAB2IP,PCGF2,RAD51,E2F1
GO: Biological Process	GO:0031100	animal organ regeneration		0.002749	1	0.03693	0.3508	11	80	ATIC,AXL,AURKA,CAD,CCNA2,CDK1,PCNA,PKM,ITPR1,RAP1A,PTPRU
GO: Biological Process	GO:0007417	central nervous system development		0.002829	1	0.03754	0.3565	80	1129	RIDA,ERCC2,ABR,ACAT1,USP9X,ACTL6A,FANCD2,FZD1,FZD4,DLC1,NME5,FGFR2,TACC3,POMK,FLNA,XRN2,STIL,SHROOM2,ZNF430,MTOR,ATIC,SNRPB,SUFU,PHLPP2,B4GALT2,SOX4,SOX9,SOX15,SOX12,STK36,CLUAP1,ATP7A,ATRX,AXL,SRD5A1,ZC4H2,BMPR1A,GLUD1,LOXL3,YWHAQ,SATB2,RPGRIP1L,ARHGAP35,CBS,PAFAH1B3,H2AX,DAAM2,EXOC4,CDKN2C,CENPF,CKB,HPRT1,PKD1,DPCD,XRCC5,ADGRA2,YWHAH,THOC6,CELSR1,TMEM98,SLC45A3,ZIC5,RBPJ,CNTNAP2,PRKDC,PRKG1,IL6…
GO: Biological Process	GO:0051300	spindle pole body organization		0.002849	1	0.03754	0.3565	2	2	CENPJ,CETN3
GO: Biological Process	GO:0033567	DNA replication, Okazaki fragment processing		0.002849	1	0.03754	0.3565	2	2	DNA2,LIG1
GO: Biological Process	GO:0006535	cysteine biosynthetic process from serine		0.002849	1	0.03754	0.3565	2	2	CBS,CBSL
GO: Biological Process	GO:1904744	positive regulation of telomeric DNA binding		0.002849	1	0.03754	0.3565	2	2	ACD,PINX1
GO: Biological Process	GO:0048817	negative regulation of hair follicle maturation		0.002849	1	0.03754	0.3565	2	2	FERMT1,CDH3
GO: Biological Process	GO:0007057	spindle assembly involved in female meiosis I		0.002849	1	0.03754	0.3565	2	2	AURKA,FBXO5
GO: Biological Process	GO:0090233	negative regulation of spindle checkpoint		0.002849	1	0.03754	0.3565	2	2	AURKA,CDT1
GO: Biological Process	GO:0017126	nucleologenesis		0.002849	1	0.03754	0.3565	2	2	EMG1,POLR1B
GO: Biological Process	GO:0006168	adenine salvage		0.002849	1	0.03754	0.3565	2	2	APRT,HPRT1
GO: Biological Process	GO:0030474	spindle pole body duplication		0.002849	1	0.03754	0.3565	2	2	CENPJ,CETN3
GO: Biological Process	GO:0097329	response to antimetabolite		0.003014	1	0.03957	0.3758	5	20	ATRX,SPIDR,ABCC2,DHFR,RAD51
GO: Biological Process	GO:0042276	error-prone translesion synthesis		0.003014	1	0.03957	0.3758	5	20	PCNA,POLE2,RFC4,RFC5,RPA3
GO: Biological Process	GO:0001510	RNA methylation		0.003035	1	0.03978	0.3778	11	81	FBL,MRM1,EMG1,WDR4,DIMT1,GTPBP3,HSD17B10,METTL2A,NSUN2,TRDMT1,TFB1M
GO: Biological Process	GO:0051294	establishment of spindle orientation		0.00306	1	0.03996	0.3796	7	38	SPRY1,NDC80,SPAG5,PLK1,NDE1,DCTN1,MAD2L1
GO: Biological Process	GO:0002053	positive regulation of mesenchymal cell proliferation		0.00306	1	0.03996	0.3796	7	38	FGFR2,MYC,SOX9,BMPR1A,HMGB1,IRS1,LRP5
GO: Biological Process	GO:0044089	positive regulation of cellular component biogenesis		0.003076	1	0.04006	0.3804	45	566	ERCC1,ERCC2,F2RL1,TENM2,RACK1,ZMYND10,FES,CUL4A,FLNA,PPM1E,NLGN1,SPAG5,PDLIM4,MSN,ARL2,MTOR,PLK4,SOX9,ATP7A,CENPJ,TOGARAM1,WDR43,BIK,DIMT1,PSRC1,ICE1,ARHGAP35,SPIDR,TMEM67,ZMYND8,TWF2,PFN1,LRRN3,ARHGEF10,CCP110,DHX33,DCTN1,CDT1,ESPN,HDAC6,SLITRK4,HEATR1,G3BP1,ABI2,RPA3
GO: Biological Process	GO:0016032	viral process		0.003078	1	0.04006	0.3804	63	853	ERCC2,RPL34,RPL36A,NUP85,RPS2,RPS7,RPS10,TRIM59,RACK1,CUL4A,MRE11,MAGI3,GADD45GIP1,NUP35,MSN,NDC1,TRIM32,EIF3B,MYC,ZMYND11,AXL,SSB,NUP205,BUB1,C1QBP,LARP1,CCNA2,PSIP1,H2AX,CDK1,PC,TOP2A,PCNA,PFN1,HNRNPA1,AP1S1,NUCKS1,PLCG1,POLR2L,XPO1,XRCC5,PPIA,ILF3,DHX9,NECTIN2,USP7,KPNA2,KPNA3,IPO5,RAN,RANBP1,CENPU,AP1M2,RPSA,G3BP1,ABI2,TRIM28,DYNC1LI1,ALYREF,VPS28,RPL7,RPL8,RPL17
GO: Biological Process	GO:0007276	gamete generation		0.00314	1	0.04079	0.3874	59	789	KIF18A,ERCC1,BRIP1,STRBP,USP9X,KATNAL1,RPL39L,NDRG3,TTC26,FANCD2,FANCG,NME5,MERTK,CRTAP,XRN2,IFT81,MSH2,NDC1,RUVBL1,MTOR,SCMH1,SMARCA2,SOD1,SOX9,ATRX,MCM8,AXL,BIK,AURKA,PSME4,ABHD2,SLC2A14,ODF2,NCAPH,CIT,DDIAS,PAFAH1B3,H2AX,TOP2A,PTTG1,HMGB2,TRIP13,TTK,PLAU,PRMT7,PLK1,DPCD,SPAG6,PRKAR1A,CTSV,NSUN2,FBXO5,NECTIN2,SGO2,KIFC1,E2F1,ZMIZ1,LIN28A,DAZAP1
GO: Biological Process	GO:0019320	hexose catabolic process		0.003206	1	0.04157	0.3948	9	59	MPI,GAPDH,GPI,PGAM1,PKM,GALM,LDHA,LRP5,ENO1
GO: Biological Process	GO:0019083	viral transcription		0.003261	1	0.04222	0.401	20	197	RPL34,RPL36A,NUP85,RPS2,RPS7,RPS10,NUP35,NDC1,TRIM32,NUP205,TOP2A,PFN1,NUCKS1,POLR2L,DHX9,RPSA,TRIM28,RPL7,RPL8,RPL17
GO: Biological Process	GO:0010971	positive regulation of G2/M transition of mitotic cell cycle		0.003279	1	0.04238	0.4025	6	29	MTA3,DTL,CDK1,CDC25A,FBXO5,LMNB1
GO: Biological Process	GO:0001837	epithelial to mesenchymal transition		0.00332	1	0.04283	0.4068	17	157	SPRY1,FGFR2,FLNA,MTOR,SOX9,BMPR1A,LOXL3,TCOF1,TRIP10,HNRNPAB,BAMBI,RBPJ,IL6,DAB2IP,FAM83D,TRIM28,LOXL2
GO: Biological Process	GO:0019884	antigen processing and presentation of exogenous antigen		0.003378	1	0.04351	0.4132	19	184	KIF18A,PSME4,KIF2C,DCTN3,HLA-B,HLA-DQB1,HLA-DRB5,AP1S1,KIF23,CTSV,PSMA2,KIF4A,PSMD3,DCTN1,KIF15,KIF11,KIF22,AP1M2,DYNC1LI1
GO: Biological Process	GO:0006396	RNA processing		0.003398	1	0.04369	0.415	100	1474	ZNF326,ERCC2,FBL,RPS2,RBM10,MRM1,RPS7,WDR18,NPM3,NUFIP1,SNORD12C,NAF1,RPF2,EMG1,AKT2,TTF2,XRN2,SRSF1,SRSF7,OSGEP,LYAR,TBL3,KHSRP,SRRT,SEPHS1,PELP1,TSR1,FRG1,PUS1,WDR12,FUS,SNRPA,SNRPB,SNRPD1,SNRPF,WDR4,HNRNPM,SSB,WDR43,WDR3,MDN1,TXNL4A,DIMT1,RBMX,DDX18,POP1,C1QBP,BOP1,EBNA1BP2,GTPBP3,CSTF2T,YBX1,TSEN2,GRSF1,ZC3H10,LSM6,PSIP1,TIA1,PA2G4,RRP9,HSD17B10,EXOSC8,HNRNPA1,LSM5,HNRNPA2B1,TSEN34,PRMT7,METT…
GO: Biological Process	GO:0045023	G0 to G1 transition		0.003479	1	0.04466	0.4242	8	49	SOX15,BRCA1,CBX3,CHEK1,DAB2IP,PCGF2,RAD51,E2F1
GO: Biological Process	GO:1904589	regulation of protein import		0.003531	1	0.04494	0.4268	10	71	FLNA,ANGPT1,FERMT1,SUFU,HNRNPM,EI24,IPO5,RAN,ECT2,TRIM28
GO: Biological Process	GO:0043967	histone H4 acetylation		0.003531	1	0.04494	0.4268	10	71	ACTL6A,JADE1,TRRAP,TADA3,APBB1,RUVBL1,BRCA1,MSL3,WDR5,KANSL1L
GO: Biological Process	GO:0006360	transcription by RNA polymerase I		0.003531	1	0.04494	0.4268	10	71	ERCC2,POLR1B,FLNA,MTOR,WDR43,TCOF1,POLR1A,POLR2L,DHX33,HEATR1
GO: Biological Process	GO:0045835	negative regulation of meiotic nuclear division		0.003543	1	0.04494	0.4268	4	13	TRIP13,TTK,PRKAR1A,FBXO5
GO: Biological Process	GO:0051315	attachment of mitotic spindle microtubules to kinetochore		0.003543	1	0.04494	0.4268	4	13	NDC80,KIF2C,NUF2,CDT1
GO: Biological Process	GO:1904816	positive regulation of protein localization to chromosome, telomeric region		0.003543	1	0.04494	0.4268	4	13	CCT7,CCT5,GNL3,WRAP53
GO: Biological Process	GO:0009223	pyrimidine deoxyribonucleotide catabolic process		0.003543	1	0.04494	0.4268	4	13	NTHL1,OGG1,DCTPP1,DUT
GO: Biological Process	GO:0051338	regulation of transferase activity		0.003556	1	0.04502	0.4276	77	1089	SPRY1,RPS2,RPS7,MDFI,F2R,ANKRD54,FZD4,USP44,RACK1,NAF1,MRE11,ANGPT1,PIK3R3,PPM1E,MAGI3,STIL,MTOR,TPX2,CLSPN,MAP3K21,SOD1,SORL1,MYC,DCUN1D4,DBF4,UBE2S,PSRC1,UBE2C,GPRC5A,CBS,CCNA2,CCNF,CCNG1,CCNB2,CDK1,CDC6,CDC20,PARD3,CDC25A,AURKB,CDKN2C,CDKN3,CORO1C,HMGB1,HMGN1,HNRNPA2B1,TXN,CKS1B,CKS2,UCHL1,PKD1,FBXO7,DSCC1,PLK1,IQGAP3,SMYD3,AKAP6,PIFO,XRCC5,PRKAR1A,IL6,DAB2IP,ACD,IRS1,NCAPG2,FBXO5,TELO2,PINX1,…
GO: Biological Process	GO:0051053	negative regulation of DNA metabolic process		0.003564	1	0.04505	0.4279	15	132	ERCC1,ZRANB3,FANCB,MSH2,OGG1,CHEK1,HNRNPA1,AUNIP,RMI2,XRCC5,ACD,ANKLE1,DFFA,PINX1,TRIM28
GO: Biological Process	GO:0006165	nucleoside diphosphate phosphorylation		0.003578	1	0.04515	0.4288	16	145	NUP85,NME5,MPI,NUP35,NDC1,MYC,GAPDH,SUCLG1,NUP205,NME2,GPI,PGAM1,PKM,DTYMK,LDHA,ENO1
GO: Biological Process	GO:0009628	response to abiotic stimulus		0.003601	1	0.04536	0.4308	94	1375	ERCC1,ERCC2,BRIP1,NUP85,STRBP,SMC1A,ACTA1,ETV1,ZRANB3,FANCD2,S100A13,FANCG,MTCO2P12,ADSL,FEN1,AKT2,TACC3,RAD54L,TICRR,DTL,APBB1,MSH2,NUP35,RAD51AP1,NDC1,TRIM32,MTOR,ATP1B1,SOD1,B4GALT2,MYC,SOX4,SOX9,ATP7A,NUP205,METAP1,PSME4,BRCA1,REEP6,OGG1,CBS,CCNA2,DDIAS,PSIP1,PDLIM1,CEP250,H2AX,SPIDR,CDC25A,PCNA,AURKB,SERPINF1,HMGN1,CHEK1,PLEKHB1,TRIP10,TXN,RAD54B,PKD1,PKM,NUCKS1,PRMT2,PLAU,ABCC2,SLC25A23,POL…
GO: Biological Process	GO:1903311	regulation of mRNA metabolic process		0.003635	1	0.04571	0.4342	30	342	RIDA,RBM10,SRSF1,SRSF7,APEX1,KHSRP,MTOR,SNRPA,HNRNPM,PSME4,RBMX,TNRC6A,C1QBP,YBX1,LARP1,ZC3H10,TIA1,EXOSC8,HNRNPA1,HNRNPA2B1,XPO1,PAF1,SERBP1,EIF4A3,PSMA2,PSMD3,DHX9,E2F1,TOB1,DAZAP1
GO: Biological Process	GO:0009132	nucleoside diphosphate metabolic process		0.003698	1	0.04643	0.441	18	172	NUP85,NME5,MPI,MAGI3,NUP35,NDC1,CARD11,MYC,GAPDH,SUCLG1,NUP205,NME2,GPI,PGAM1,PKM,DTYMK,LDHA,ENO1
GO: Biological Process	GO:0043087	regulation of GTPase activity		0.00372	1	0.04662	0.4428	40	494	TBC1D19,SPRY1,ABR,RTKN,F2R,F2RL1,FAM13B,TBC1D24,DLC1,RACK1,SRGAP1,FGD1,AKT2,SIPA1L2,ARFGEF1,ARHGAP4,ARL2,MTOR,SOD1,MYO9A,ASAP2,ARHGAP35,ARHGAP19,CORO1C,CHN2,IQGAP3,ARHGEF10,TBCK,PRKG1,RINL,GPSM1,DAB2IP,ARHGAP11A,IPO5,RANBP1,RAP1A,ECT2,RGS10,RGS12,GRTP1
GO: Biological Process	GO:0019827	stem cell population maintenance		0.003806	1	0.04762	0.4523	19	186	SETD6,SMC1A,FANCD2,CUL4A,SRRT,MED28,TET1,SOX4,SOX9,BMPR1A,TEAD4,ZNF358,POLR2L,PAF1,RBPJ,GNL3,LIN28A,LOXL2,LRP5
GO: Biological Process	GO:0033119	negative regulation of RNA splicing		0.003922	1	0.04899	0.4653	6	30	RBM10,AKT2,SRSF7,RBMX,C1QBP,HNRNPA2B1
GO: Biological Process	GO:0010259	multicellular organism aging		0.003958	1	0.04936	0.4688	8	50	ERCC1,RAD54L,MSH2,NDUFS6,TFCP2L1,RAD54B,CTSV,ANKLE1
GO: Cellular Component	GO:0098687	chromosomal region		1.009e-40	1.015e-37	1.015e-37	7.601e-37	94	362	KIF18A,ERCC1,MIS18BP1,CENPW,NUP85,SMC1A,HJURP,SPC25,MCM2,MCM3,MCM5,MCM6,MCM7,CDC45,CENPP,NDC80,FEN1,MRE11,PHF6,APEX1,BIRC5,MSH2,SPAG5,SCMH1,CENPI,CDCA5,CENPN,ATRX,SSB,CENPK,AURKA,NCAPG,SUGT1,BUB1,BUB1B,CBX1,NSMCE1,KIF2C,NCAPD3,KMT5C,MIS18A,ZWINT,ORC2,H2AX,CDK1,SKA1,PCNA,DCTN3,AURKB,HELLS,CENPF,CBX3,OIP5,CHEK1,TTK,HNRNPA2B1,CENPM,RECQL4,BOD1L1,DSCC1,PLK1,POLD1,XPO1,NUDCD2,XRCC5,PPP1CC,THOC6,CENPH,…
GO: Cellular Component	GO:0000775	chromosome, centromeric region		1.375e-32	1.383e-29	6.915e-30	5.181e-29	63	202	KIF18A,MIS18BP1,CENPW,NUP85,SMC1A,HJURP,SPC25,CENPP,NDC80,PHF6,BIRC5,SPAG5,CENPI,CDCA5,CENPN,ATRX,CENPK,AURKA,NCAPG,SUGT1,BUB1,BUB1B,CBX1,KIF2C,NCAPD3,KMT5C,MIS18A,ZWINT,ORC2,SKA1,DCTN3,AURKB,HELLS,CENPF,CBX3,OIP5,TTK,CENPM,BOD1L1,DSCC1,PLK1,XPO1,NUDCD2,PPP1CC,CENPH,KNTC1,INCENP,NDE1,ERCC6L,NUF2,DCTN1,PINX1,SGO2,CDT1,KIF22,DNMT3B,ZWILCH,CENPU,CDCA8,ESCO2,DYNC1LI1,SKA3,MAD2L1
GO: Cellular Component	GO:0000793	condensed chromosome		3.672e-29	3.694e-26	1.231e-26	9.224e-26	64	236	MIS18BP1,CENPW,NUP85,SMC1A,HJURP,SPC25,ADD3,FANCD2,NDC80,MRE11,PHF6,BIRC5,SMC2,SPAG5,CDCA5,CENPN,ATRX,CENPK,AURKA,NCAPG,BRCA1,BUB1,BUB1B,NSMCE1,KIF2C,NCAPD3,KMT5C,NCAPH,ZWINT,ORC2,H2AX,SKA1,TOP2A,DCTN3,AURKB,CENPF,CBX3,HMGB1,HMGB2,CHEK1,CENPM,BOD1L1,PLK1,NUDCD2,PPP1CC,CENPH,KNTC1,INCENP,NDE1,ERCC6L,NUF2,NCAPG2,PINX1,SGO2,CDT1,RAD51,ZWILCH,SMC6,CENPU,RGS12,LRPPRC,DYNC1LI1,SKA3,MAD2L1
GO: Cellular Component	GO:0000779	condensed chromosome, centromeric region		1.461e-28	1.469e-25	3.674e-26	2.752e-25	46	120	MIS18BP1,CENPW,NUP85,SMC1A,HJURP,SPC25,NDC80,PHF6,BIRC5,SPAG5,CENPN,ATRX,CENPK,AURKA,NCAPG,BUB1,BUB1B,KIF2C,NCAPD3,KMT5C,ZWINT,ORC2,SKA1,DCTN3,AURKB,CENPF,CBX3,CENPM,BOD1L1,PLK1,NUDCD2,PPP1CC,CENPH,KNTC1,INCENP,NDE1,ERCC6L,NUF2,PINX1,SGO2,CDT1,ZWILCH,CENPU,DYNC1LI1,SKA3,MAD2L1
GO: Cellular Component	GO:0015630	microtubule cytoskeleton		8.62e-28	8.671e-25	1.734e-25	1.299e-24	169	1368	NUSAP1,KIF18A,MAP9,ERCC2,NUP85,STRBP,SMC1A,RPS7,MCM2,MCM3,JADE1,KATNAL1,IFT43,TTC26,CDC45,EHD2,TUBA1B,TUBB4B,NDC80,ZMYND10,FAM161A,FAM92A,NME5,FES,IFT80,TACC3,CAMSAP1,MZT2B,TADA3,RSPH9,IFT74,IFT81,GTSE1,DTL,TUBB,APEX1,BIRC5,CCT7,STIL,SHROOM2,SPAG5,WDR47,ARHGAP4,ARL2,RUVBL1,HAUS1,CCT5,TPX2,CEP70,MZT2A,CEP152,PLK4,SNTB2,MYC,CLUAP1,CENPJ,GAPDH,TOGARAM1,AURKA,BRCA1,BUB1B,CBX1,HYLS1,MLLT11,PSRC1,KIF2C…
GO: Cellular Component	GO:0000776	kinetochore		1.633e-27	1.642e-24	2.737e-25	2.051e-24	48	138	KIF18A,MIS18BP1,CENPW,NUP85,SMC1A,HJURP,SPC25,NDC80,PHF6,BIRC5,SPAG5,CENPI,CENPN,CENPK,SUGT1,BUB1,BUB1B,KIF2C,NCAPD3,ZWINT,ORC2,SKA1,DCTN3,AURKB,CENPF,TTK,CENPM,BOD1L1,PLK1,XPO1,NUDCD2,PPP1CC,CENPH,KNTC1,INCENP,NDE1,ERCC6L,NUF2,DCTN1,PINX1,SGO2,CDT1,KIF22,ZWILCH,CENPU,DYNC1LI1,SKA3,MAD2L1
GO: Cellular Component	GO:0000777	condensed chromosome kinetochore		1.628e-24	1.638e-21	2.34e-22	1.753e-21	40	107	MIS18BP1,CENPW,NUP85,SMC1A,HJURP,SPC25,NDC80,PHF6,BIRC5,SPAG5,CENPN,CENPK,BUB1,BUB1B,KIF2C,NCAPD3,ZWINT,ORC2,SKA1,DCTN3,CENPF,CENPM,BOD1L1,PLK1,NUDCD2,PPP1CC,CENPH,KNTC1,INCENP,NDE1,ERCC6L,NUF2,PINX1,SGO2,CDT1,ZWILCH,CENPU,DYNC1LI1,SKA3,MAD2L1
GO: Cellular Component	GO:0005814	centriole		2.071e-22	2.084e-19	2.605e-20	1.951e-19	92	583	RPS7,MCM3,KATNAL1,TTC26,CDC45,NDC80,ZMYND10,FAM161A,FAM92A,IFT80,TACC3,MZT2B,IFT74,IFT81,DTL,APEX1,BIRC5,STIL,SPAG5,ARL2,HAUS1,CCT5,CEP70,MZT2A,CEP152,PLK4,CLUAP1,CENPJ,AURKA,BRCA1,HYLS1,KIF2C,RPGRIP1L,ODF2,TSEN2,CCNF,ORC2,B9D2,RABL2B,CCNB2,CEP250,CKAP2L,H2AX,CDK1,CDC20,TOP2A,PCNA,DCTN3,AURKB,TMEM67,CENPF,CETN3,CTSC,CHEK1,HMMR,HOXB4,AUNIP,CBY1,BOD1L1,PLK1,KIF23,IFT22,TBC1D31,ARHGEF10,LRRCC1,ESPL1…
GO: Cellular Component	GO:0044450	microtubule organizing center part		2.342e-22	2.356e-19	2.618e-20	1.961e-19	92	584	RPS7,MCM3,KATNAL1,TTC26,CDC45,NDC80,ZMYND10,FAM161A,FAM92A,IFT80,TACC3,MZT2B,IFT74,IFT81,DTL,APEX1,BIRC5,STIL,SPAG5,ARL2,HAUS1,CCT5,CEP70,MZT2A,CEP152,PLK4,CLUAP1,CENPJ,AURKA,BRCA1,HYLS1,KIF2C,RPGRIP1L,ODF2,TSEN2,CCNF,ORC2,B9D2,RABL2B,CCNB2,CEP250,CKAP2L,H2AX,CDK1,CDC20,TOP2A,PCNA,DCTN3,AURKB,TMEM67,CENPF,CETN3,CTSC,CHEK1,HMMR,HOXB4,AUNIP,CBY1,BOD1L1,PLK1,KIF23,IFT22,TBC1D31,ARHGEF10,LRRCC1,ESPL1…
GO: Cellular Component	GO:0005815	microtubule organizing center		4.095e-22	4.12e-19	4.12e-20	3.086e-19	107	756	KIF18A,RPS7,MCM3,JADE1,KATNAL1,IFT43,TTC26,CDC45,NDC80,ZMYND10,FAM161A,FAM92A,IFT80,TACC3,MZT2B,IFT74,IFT81,DTL,APEX1,BIRC5,STIL,SPAG5,ARL2,RUVBL1,HAUS1,CCT5,TPX2,CEP70,MZT2A,CEP152,PLK4,CLUAP1,CENPJ,TOGARAM1,AURKA,BRCA1,BUB1B,HYLS1,MLLT11,KIF2C,RPGRIP1L,ARHGAP35,ODF2,TSEN2,CCNF,ORC2,B9D2,RABL2B,CCNB2,CEP250,CKAP2L,H2AX,CDK1,CDC20,TOP2A,PCNA,DCTN3,AURKB,TMEM67,CENPF,CETN3,CTSC,CHEK1,HMMR,HOXB4,AU…
GO: Cellular Component	GO:0005819	spindle		7.073e-22	7.116e-19	6.469e-20	4.846e-19	69	359	NUSAP1,KIF18A,MAP9,ERCC2,NUP85,SMC1A,KATNAL1,FAM161A,TACC3,MZT2B,TADA3,BIRC5,SPAG5,HAUS1,TPX2,MZT2A,MYC,AURKA,BUB1B,CBX1,PSRC1,ODF2,CEP250,CKAP2L,CDK1,CDC6,CDC20,PARD3,SKA1,DCTN3,AURKB,CENPF,CBX3,TTK,AUNIP,BOD1L1,PLK1,VRK1,KIF23,NUDCD2,TBCK,ESPL1,KNTC1,HAUS6,INCENP,NDE1,DLGAP5,KIF4A,DCTN1,NSUN2,CEP170,FBXO5,KIF15,PINX1,FAM83D,KIF11,KIFC1,KIF22,ECT2,CDCA8,KIF20A,RMDN1,SHCBP1,DYNC1LI1,CKAP2,EMD,SKA…
GO: Cellular Component	GO:0005813	centrosome		3.969e-21	3.993e-18	3.327e-19	2.493e-18	85	532	RPS7,MCM3,KATNAL1,TTC26,CDC45,NDC80,ZMYND10,FAM161A,IFT80,TACC3,MZT2B,IFT74,IFT81,DTL,APEX1,STIL,SPAG5,ARL2,HAUS1,CCT5,CEP70,MZT2A,CEP152,PLK4,CLUAP1,CENPJ,AURKA,BRCA1,HYLS1,KIF2C,RPGRIP1L,ODF2,TSEN2,CCNF,ORC2,B9D2,RABL2B,CCNB2,CEP250,CKAP2L,H2AX,CDK1,CDC20,PCNA,DCTN3,AURKB,TMEM67,CENPF,CETN3,CTSC,CHEK1,HMMR,HOXB4,AUNIP,BOD1L1,PLK1,KIF23,IFT22,TBC1D31,ARHGEF10,LRRCC1,ESPL1,CCP110,HAUS6,NDE1,KIAA0…
GO: Cellular Component	GO:0000781	chromosome, telomeric region		6.144e-14	6.181e-11	4.329e-12	3.243e-11	36	163	ERCC1,MCM2,MCM3,MCM5,MCM6,MCM7,CDC45,FEN1,MRE11,APEX1,MSH2,ATRX,SSB,CBX1,NSMCE1,ORC2,H2AX,CDK1,PCNA,CBX3,CHEK1,HNRNPA2B1,RECQL4,POLD1,XRCC5,PPP1CC,THOC6,PRKDC,ACD,TELO2,PINX1,DNA2,RAD51,SMC6,WRAP53,ALYREF
GO: Cellular Component	GO:0042555	MCM complex		6.455e-14	6.494e-11	4.329e-12	3.243e-11	21	54	WDR18,MCM2,MCM3,MCM5,MCM6,MCM7,MCM10,ZRANB3,CDC45,GINS4,GINS2,MCM8,TONSL,PCNA,POLA2,POLD1,PRIM1,PRIM2,GINS1,MMS22L,RPA3
GO: Cellular Component	GO:0097373	MCM core complex		6.455e-14	6.494e-11	4.329e-12	3.243e-11	21	54	WDR18,MCM2,MCM3,MCM5,MCM6,MCM7,MCM10,ZRANB3,CDC45,GINS4,GINS2,MCM8,TONSL,PCNA,POLA2,POLD1,PRIM1,PRIM2,GINS1,MMS22L,RPA3
GO: Cellular Component	GO:0005739	mitochondrion		5.096e-13	5.126e-10	3.204e-11	2.4e-10	166	1865	MRPL23,RIDA,MTG1,RPL34,ACAT1,MRM1,HJURP,ABHD6,COA4,MDH1,MDH2,ADH5,FANCG,NLN,MTCO2P12,ADSL,RACK1,MRPS17,FEN1,MIPEP,NOL7,AKT2,TIMM44,FOXRED1,ADCK5,FLVCR1,PPM1E,MRPL13,SHMT1,APEX1,MRPL28,CCT7,CHCHD6,DEGS1,GADD45GIP1,ARL2,TIMM21,NUDT1,MTHFD1,MTOR,SLC25A39,PUS1,ATIC,MTFR2,ALDH7A1,GABBR1,SOD1,ATP5F1D,LYRM7,MYC,SOX4,ATP5MC1,ATP5MC3,PECR,ATP5PO,GAPDH,CISD1,GARS1,NARS1,BCAT1,SSBP1,BLOC1S1,NDUFA4,NDUFA9,SU…
GO: Cellular Component	GO:0005874	microtubule		1.593e-12	1.603e-09	9.428e-11	7.063e-10	77	636	NUSAP1,KIF18A,MAP9,KATNAL1,TUBA1B,TUBB4B,FAM161A,NME5,CAMSAP1,RSPH9,IFT81,GTSE1,TUBB,BIRC5,CCT7,SHROOM2,SPAG5,WDR47,ARHGAP4,HAUS1,CCT5,TPX2,SNTB2,CLUAP1,CENPJ,TOGARAM1,AURKA,PSRC1,KIF2C,RPGRIP1L,ABHD2,TUBA1C,ODF2,RABL2B,CDK1,SKA1,DCTN3,AURKB,TMEM67,CENPF,TRIP10,TUBB2A,TBCB,BOD1L1,PLK1,KIF23,SPAG6,PRKAR1A,KNTC1,HAUS6,INCENP,NDE1,KIF4A,TUBB2B,DCTN1,CEP170,KIF15,KIF11,KIFC1,KIF22,CCDC40,RAN,HDAC6,WD…
GO: Cellular Component	GO:0000808	origin recognition complex		5.609e-12	5.643e-09	3.135e-10	2.349e-09	19	53	WDR18,MCM2,MCM3,MCM10,ZRANB3,CDC45,GINS4,GINS2,TONSL,ORC2,PCNA,ORC6,POLA2,POLD1,PRIM1,PRIM2,GINS1,MMS22L,RPA3
GO: Cellular Component	GO:0000784	nuclear chromosome, telomeric region		3.232e-11	3.251e-08	1.711e-09	1.282e-08	28	126	ERCC1,MCM2,MCM3,MCM5,MCM6,MCM7,FEN1,MRE11,APEX1,MSH2,ATRX,SSB,CBX1,ORC2,CDK1,PCNA,CBX3,POLD1,XRCC5,PPP1CC,THOC6,PRKDC,ACD,TELO2,PINX1,DNA2,RAD51,ALYREF
GO: Cellular Component	GO:0005759	mitochondrial matrix		4.122e-11	4.147e-08	2.074e-09	1.553e-08	61	478	MRPL23,RIDA,MTG1,ACAT1,MRM1,MDH2,MRPS17,MIPEP,TIMM44,MRPL13,MRPL28,GADD45GIP1,ARL2,NUDT1,PUS1,ALDH7A1,SOD1,ATP5F1D,LYRM7,GARS1,SSBP1,BLOC1S1,NDUFA9,SUCLG1,DIMT1,BRCA1,GLDC,GLUD1,C1QBP,ACSF3,MARS2,OAT,TFAM,GRSF1,CBR4,HSD17B10,CDK1,HADH,PC,PCCB,PCK2,PDSS1,TST,HSPE1,PTCD1,MRPS26,MRPS9,MRPL36,MRPL11,MRPL1,EARS2,DECR1,MRPL16,DNA2,RAD51,DTYMK,MRPL4,LRPPRC,TRAP1,MECR,TFB1M
GO: Cellular Component	GO:0000922	spindle pole		9.61e-11	9.668e-08	4.604e-09	3.449e-08	32	168	SMC1A,KATNAL1,FAM161A,TACC3,SPAG5,HAUS1,TPX2,AURKA,PSRC1,ODF2,CEP250,CKAP2L,CDC6,CDC20,AURKB,CENPF,AUNIP,BOD1L1,PLK1,NUDCD2,KNTC1,NDE1,DLGAP5,DCTN1,FAM83D,KIF11,RMDN1,DYNC1LI1,CKAP2,EMD,CSPP1,MAD2L1
GO: Cellular Component	GO:0005656	nuclear pre-replicative complex		3.083e-10	3.102e-07	1.349e-08	1.01e-07	16	45	WDR18,MCM3,MCM10,ZRANB3,CDC45,GINS4,GINS2,TONSL,PCNA,POLA2,POLD1,PRIM1,PRIM2,GINS1,MMS22L,RPA3
GO: Cellular Component	GO:0036387	pre-replicative complex		3.083e-10	3.102e-07	1.349e-08	1.01e-07	16	45	WDR18,MCM3,MCM10,ZRANB3,CDC45,GINS4,GINS2,TONSL,PCNA,POLA2,POLD1,PRIM1,PRIM2,GINS1,MMS22L,RPA3
GO: Cellular Component	GO:0005730	nucleolus		5.916e-10	5.951e-07	2.48e-08	1.858e-07	131	1495	NUSAP1,MRPL23,TMA16,CENPW,FBL,RPS2,TRAIP,RPS7,HJURP,RPS10,WDR18,MCM2,MCM3,MCM7,MCM10,NPM3,NUFIP1,FANCD2,CENPP,S100A13,FANCG,SNORD12C,RPF2,FEN1,RBM14,EMG1,POLR1B,NOL7,FLNA,MYBBP1A,XRN2,NOP16,DTL,PPM1E,ARFGEF1,PHF6,APEX1,G2E3,LYAR,SMC2,TBL3,ARL2,UBE2T,PELP1,CCT5,TSR1,FRG1,PUS1,WDR12,PLK4,MYC,DTD1,SPTBN1,HNRNPM,MAK16,SSRP1,WDR43,WDR3,MDN1,DIMT1,DDX18,RRP12,POP1,C1QBP,BOP1,EBNA1BP2,TCOF1,GPRC5A,TSEN2…
GO: Cellular Component	GO:0044451	nucleoplasm part		8.924e-10	8.977e-07	3.591e-08	2.69e-07	110	1191	ERCC1,ERCC2,FBL,RBM10,WDR18,MCM3,ACTL6A,JADE1,MCM10,TRRAP,TENM2,ZRANB3,NUFIP1,CDC45,FANCD2,FANCB,RMI1,FANCG,MTA3,RBM14,TADA3,MRE11,TTF2,SRSF1,SRSF7,NACC1,APBB1,APEX1,GINS4,OSGEP,FANCM,WDR19,RUVBL1,PELP1,MTOR,FRG1,MED28,CENPI,GINS2,MYC,ATRX,HNRNPM,LHPP,SSRP1,SAP30,PSME4,DBF4,TONSL,MSL3,CSTF2T,SATB2,TCF7,ICE1,WDR5,ZNF496,OGG1,ZWINT,EXO1,H2AX,PCNA,OIP5,POLA2,HNRNPA2B1,ZNF462,CBY1,GTF2H2C,POLD1,POLE2…
GO: Cellular Component	GO:0000794	condensed nuclear chromosome		9.992e-10	1.005e-06	3.866e-08	2.896e-07	24	109	MIS18BP1,SMC1A,ADD3,NDC80,MRE11,ATRX,CENPK,AURKA,BRCA1,BUB1,BUB1B,NCAPD3,KMT5C,NCAPH,H2AX,AURKB,CHEK1,PLK1,INCENP,NUF2,SGO2,RAD51,RGS12,LRPPRC
GO: Cellular Component	GO:0005876	spindle microtubule		1.07e-09	1.076e-06	3.986e-08	2.986e-07	18	62	NUSAP1,KIF18A,MAP9,FAM161A,BIRC5,SPAG5,TPX2,AURKA,PSRC1,CDK1,SKA1,AURKB,BOD1L1,PLK1,KNTC1,KIF4A,KIF11,SKA3
GO: Cellular Component	GO:0000811	GINS complex		1.511e-09	1.52e-06	5.429e-08	4.067e-07	15	43	MCM3,MCM10,ZRANB3,CDC45,GINS4,GINS2,TONSL,PCNA,POLA2,POLD1,PRIM1,PRIM2,GINS1,MMS22L,RPA3
GO: Cellular Component	GO:0031261	DNA replication preinitiation complex		2.185e-09	2.198e-06	7.579e-08	5.677e-07	15	44	MCM3,MCM10,ZRANB3,CDC45,GINS4,GINS2,TONSL,PCNA,POLA2,POLD1,PRIM1,PRIM2,GINS1,MMS22L,RPA3
GO: Cellular Component	GO:0005657	replication fork		2.833e-09	2.85e-06	9.499e-08	7.116e-07	19	73	MCM3,MCM10,ZRANB3,CDC45,MRE11,GINS4,GINS2,TONSL,H2AX,PCNA,CHEK1,POLA2,POLD1,PRIM1,PRIM2,MMS22L,RFC4,RFC5,RPA3
GO: Cellular Component	GO:0044429	mitochondrial part		3.151e-09	3.17e-06	1.022e-07	7.66e-07	100	1071	MRPL23,RIDA,MTG1,ACAT1,MRM1,ABHD6,COA4,MDH2,NLN,MTCO2P12,MRPS17,MIPEP,TIMM44,FOXRED1,FLVCR1,MRPL13,MRPL28,CHCHD6,GADD45GIP1,ARL2,TIMM21,NUDT1,MTOR,SLC25A39,PUS1,ALDH7A1,GABBR1,SOD1,ATP5F1D,LYRM7,ATP5MC1,ATP5MC3,ATP5PO,CISD1,GARS1,SSBP1,BLOC1S1,NDUFA4,NDUFA9,SUCLG1,COQ2,NDUFB3,NDUFS6,BIK,DIMT1,BPHL,BRCA1,GLDC,GLUD1,VAMP1,C1QBP,ACSF3,NME2,UQCR11,MARS2,OAT,RTN4IP1,TFAM,GRSF1,CBR4,TMEM177,SLC44A1,TAM…
GO: Cellular Component	GO:0031967	organelle envelope		6.517e-09	6.556e-06	2.043e-07	1.531e-06	113	1279	MRPL23,MTG1,BRIP1,NUP85,ACAT1,SHISA5,ABHD6,COA4,MDH2,NLN,MTCO2P12,MRPS17,TIMM44,FOXRED1,FLVCR1,DTL,TUBB,MRPL13,MRPL28,CHCHD6,NUP35,SEPHS1,ARL2,NDC1,TIMM21,NUDT1,MTOR,SLC25A39,CEP70,CACYBP,GABBR1,SOD1,SORL1,ATP5F1D,LYRM7,MYC,ATP5MC1,ATP5MC3,DPY19L3,ATP5PO,GAPDH,CISD1,BLOC1S1,NDUFA4,NDUFA9,SUCLG1,COQ2,NDUFB3,NDUFS6,NUP205,BIK,WDR3,TXNL4A,BPHL,RRP12,GLUD1,VAMP1,NME2,UQCR11,YBX1,RTN4IP1,TMEM177,SLC44…
GO: Cellular Component	GO:0031975	envelope		6.807e-09	6.848e-06	2.043e-07	1.531e-06	113	1280	MRPL23,MTG1,BRIP1,NUP85,ACAT1,SHISA5,ABHD6,COA4,MDH2,NLN,MTCO2P12,MRPS17,TIMM44,FOXRED1,FLVCR1,DTL,TUBB,MRPL13,MRPL28,CHCHD6,NUP35,SEPHS1,ARL2,NDC1,TIMM21,NUDT1,MTOR,SLC25A39,CEP70,CACYBP,GABBR1,SOD1,SORL1,ATP5F1D,LYRM7,MYC,ATP5MC1,ATP5MC3,DPY19L3,ATP5PO,GAPDH,CISD1,BLOC1S1,NDUFA4,NDUFA9,SUCLG1,COQ2,NDUFB3,NDUFS6,NUP205,BIK,WDR3,TXNL4A,BPHL,RRP12,GLUD1,VAMP1,NME2,UQCR11,YBX1,RTN4IP1,TMEM177,SLC44…
GO: Cellular Component	GO:0000780	condensed nuclear chromosome, centromeric region		6.905e-09	6.946e-06	2.043e-07	1.531e-06	12	29	MIS18BP1,NDC80,ATRX,CENPK,AURKA,BUB1,BUB1B,KMT5C,AURKB,PLK1,NUF2,SGO2
GO: Cellular Component	GO:0072686	mitotic spindle		7.711e-09	7.758e-06	2.217e-07	1.66e-06	23	111	NUSAP1,KIF18A,MAP9,SMC1A,FAM161A,TACC3,TADA3,SPAG5,TPX2,AURKA,CKAP2L,CDK1,SKA1,AURKB,KIF23,TBCK,ESPL1,FAM83D,KIF11,KIFC1,KIF22,ECT2,MAD2L1
GO: Cellular Component	GO:0071162	CMG complex		1.05e-08	1.056e-05	2.855e-07	2.139e-06	14	42	MCM3,MCM10,ZRANB3,CDC45,GINS4,GINS2,TONSL,PCNA,POLA2,POLD1,PRIM1,PRIM2,MMS22L,RPA3
GO: Cellular Component	GO:0043596	nuclear replication fork		1.05e-08	1.056e-05	2.855e-07	2.139e-06	14	42	MCM3,MCM10,ZRANB3,CDC45,GINS4,GINS2,TONSL,PCNA,POLA2,POLD1,PRIM1,PRIM2,MMS22L,RPA3
GO: Cellular Component	GO:0030990	intraciliary transport particle		1.084e-08	1.091e-05	2.867e-07	2.148e-06	82	837	TBC1D19,JADE1,TRIM59,IFT43,TTC26,TBC1D24,TUBB4B,ZMYND10,FAM161A,FAM92A,NME5,CC2D2A,IFT80,MERTK,RSPH9,FLNA,IFT74,CFAP36,IFT81,TUBB,STIL,LYAR,WDR19,LRRC46,ARL2,HAUS1,GALNT11,CEP70,CEP152,SUFU,PLK4,PHLPP2,STK36,CLUAP1,CENPJ,TOGARAM1,AURKA,HYLS1,GPI,RPGRIP1L,ABHD2,ARHGAP35,ODF2,B9D2,RABL2B,CEP250,CDK1,DCTN3,CDK20,TMEM67,CENPF,CETN3,PLEKHB1,CBY1,PKD1,PKM,PLK1,IFT22,PIFO,SPAG6,PRKAR1A,CCP110,HAUS6,NDE1…
GO: Cellular Component	GO:1902494	catalytic complex		1.112e-08	1.118e-05	2.867e-07	2.148e-06	129	1536	ERCC1,ERCC2,ERH,ATAD5,MCM3,ACTL6A,JADE1,TRRAP,MTA3,NME5,POLR1B,TADA3,RSPH9,CUL4A,FOXRED1,NAA15,SRSF1,IFT81,PIK3R3,DTL,NAA38,KHSRP,RUVBL1,PELP1,FRG1,SMARCA2,ASB1,CACYBP,SNRPB,SNRPD1,SNRPF,WDR4,HNRNPM,NDUFA4,NDUFA9,SUCLG1,NDUFB3,DCUN1D4,SAP30,NDUFS6,PSME4,SUGT1,BRCA1,GLDC,RBMX,POP1,TONSL,BUB1B,MSL3,UBE2S,NSMCE1,SATB2,MAT2B,ABHD2,UBE2C,WDR5,ODF2,TSEN2,CCNA2,CCNF,CBR4,CCNG1,RABL2B,CCNB2,CYCS,HSD17B10…
GO: Cellular Component	GO:0034399	nuclear periphery		1.745e-08	1.755e-05	4.388e-07	3.287e-06	26	144	ZNF326,CENPW,MAT1A,SMC1A,NUFIP1,ARFGEF1,NUP35,RUVBL1,HNRNPM,NUP205,EBNA1BP2,SATB2,CAD,OGG1,PSIP1,PCNA,CENPF,HNRNPA2B1,ANAPC4,NSMF,KIF4A,TELO2,LBR,RGS12,LMNB1,EMD
GO: Cellular Component	GO:0005929	cilium		2.184e-08	2.197e-05	5.359e-07	4.015e-06	81	836	TBC1D19,JADE1,IFT43,TTC26,TBC1D24,TUBB4B,ZMYND10,FAM161A,FAM92A,NME5,CC2D2A,IFT80,MERTK,RSPH9,FLNA,IFT74,CFAP36,IFT81,TUBB,STIL,LYAR,WDR19,LRRC46,ARL2,HAUS1,GALNT11,CEP70,CEP152,SUFU,PLK4,PHLPP2,STK36,CLUAP1,CENPJ,TOGARAM1,AURKA,HYLS1,GPI,RPGRIP1L,ABHD2,ARHGAP35,ODF2,B9D2,RABL2B,CEP250,CDK1,DCTN3,CDK20,TMEM67,CENPF,CETN3,PLEKHB1,CBY1,PKD1,PKM,PLK1,IFT22,PIFO,SPAG6,PRKAR1A,CCP110,HAUS6,NDE1,KIAA05…
GO: Cellular Component	GO:0030992	intraciliary transport particle B		2.455e-08	2.47e-05	5.88e-07	4.405e-06	10	21	TRIM59,TTC26,IFT80,IFT74,IFT81,CLUAP1,RABL2B,IFT22,IFT57,IFT52
GO: Cellular Component	GO:0005720	nuclear heterochromatin		2.864e-07	0.0002881	6.7e-06	5.019e-05	16	69	SCML2,PLK4,ATRX,CBX1,NCAPD3,KMT5C,PSIP1,H2AX,H2AZ1,CBX3,EME1,PCGF2,USP7,DNMT3B,ESCO2,TRIM28
GO: Cellular Component	GO:0097542	ciliary tip		3.174e-07	0.0003193	7.256e-06	5.436e-05	13	46	IFT43,TTC26,IFT80,IFT74,IFT81,WDR19,SUFU,CLUAP1,IFT22,WDR34,IFT57,DYNC2H1,IFT52
GO: Cellular Component	GO:0000940	condensed chromosome outer kinetochore		4.042e-07	0.0004066	9.036e-06	6.77e-05	8	16	NDC80,BUB1,BUB1B,SKA1,CENPF,BOD1L1,PLK1,SKA3
GO: Cellular Component	GO:0036064	ciliary basal body		6.322e-07	0.000636	1.383e-05	0.0001036	24	150	JADE1,TTC26,FAM161A,FAM92A,IFT80,IFT81,CENPJ,TOGARAM1,RPGRIP1L,ARHGAP35,ODF2,B9D2,RABL2B,CEP250,CENPF,CETN3,CBY1,PIFO,KIAA0586,IRS1,WDR34,IFT57,IFT52,BBS7
GO: Cellular Component	GO:0010369	chromocenter		7.292e-07	0.0007336	1.561e-05	0.0001169	8	17	SCMH1,CBX1,AURKB,CBX3,OIP5,INCENP,CDCA8,ESCO2
GO: Cellular Component	GO:0030496	midbody		1.188e-06	0.001196	2.491e-05	0.0001866	26	177	STX2,ERH,ANKRD54,RACK1,BIRC5,SPAG5,AURKA,PSRC1,CIT,CDK1,DCTN3,AURKB,EXOC4,CENPF,PLK1,KIF23,PPP1CC,TBCK,INCENP,KIF4A,RAN,ECT2,CDCA8,LAP3,KIF20A,SHCBP1
GO: Cellular Component	GO:0000792	heterochromatin		1.221e-06	0.001229	2.508e-05	0.0001879	20	114	SCML2,PLK4,ATRX,CBX1,NCAPD3,KMT5C,ORC2,PSIP1,H2AX,H2AZ1,HELLS,CBX3,UBA1,EME1,PCGF2,INCENP,USP7,DNMT3B,ESCO2,TRIM28
GO: Cellular Component	GO:1990234	transferase complex		1.476e-06	0.001485	2.969e-05	0.0002224	74	821	ERCC1,ERCC2,ERH,MCM3,ACTL6A,JADE1,TRRAP,POLR1B,TADA3,CUL4A,NAA15,PIK3R3,DTL,NAA38,RUVBL1,PELP1,ASB1,CACYBP,SNRPB,SNRPD1,SNRPF,WDR4,DCUN1D4,SUGT1,BRCA1,TONSL,BUB1B,MSL3,UBE2S,NSMCE1,MAT2B,UBE2C,WDR5,CCNA2,CCNF,CCNG1,CCNB2,CDK1,CDC20,PCNA,PDSS1,POLA2,ZNF462,PHKA2,CKS1B,CKS2,PIK3CD,FBXO7,PKM,PRMT1,WDR77,ANAPC4,POLR1A,GTF2H2C,POLD1,POLE2,POLR2L,PAF1,PRIM1,PRIM2,PRKAR1A,UBR3,FBXO27,KANSL1L,PCGF2,SPTSS…
GO: Cellular Component	GO:0030684	preribosome		2.377e-06	0.002391	4.688e-05	0.0003512	16	80	FBL,RPS7,EMG1,TBL3,TSR1,WDR12,MAK16,WDR3,BOP1,EBNA1BP2,RRP9,PPAN,BMS1,RRP15,HEATR1,MRTO4
GO: Cellular Component	GO:0099513	polymeric cytoskeletal fiber		2.784e-06	0.002801	5.386e-05	0.0004035	105	1312	NUSAP1,KIF18A,MAP9,ACTA1,KATNAL1,TENM2,ADD3,TUBA1B,TUBB4B,DLC1,MYL9,FAM161A,NME5,LRRC7,CAMSAP1,RSPH9,FLNA,ANGPT1,IFT81,GTSE1,TUBB,APBB1,SLC34A2,BIRC5,CCT7,NLGN1,SHROOM2,SPAG5,PDLIM4,MSN,WDR47,ARHGAP4,HAUS1,CCT5,MYO1F,TPX2,SNTB2,CLUAP1,ATP7A,CENPJ,TOGARAM1,AURKA,NME2,PSRC1,KIF2C,CALB2,RPGRIP1L,ABHD2,TUBA1C,ODF2,RABL2B,PDLIM1,CDK1,SKA1,DCTN3,AURKB,EXOC4,TMEM67,CENPF,TWF2,TRIP10,TUBB2A,TBCB,BOD1L1,A…
GO: Cellular Component	GO:0044441	ciliary part		6.218e-06	0.006256	0.000118	0.0008842	53	547	JADE1,IFT43,TTC26,FAM161A,FAM92A,NME5,CC2D2A,IFT80,MERTK,RSPH9,IFT74,CFAP36,IFT81,LYAR,WDR19,SUFU,PHLPP2,CLUAP1,CENPJ,TOGARAM1,GPI,RPGRIP1L,ABHD2,ARHGAP35,ODF2,B9D2,RABL2B,CEP250,TMEM67,CENPF,CETN3,PLEKHB1,CBY1,PKD1,IFT22,PIFO,SPAG6,PRKAR1A,KIAA0586,IRS1,DCTN1,CEP170,TMEM231,TCTN1,CCDC40,RAN,WDR34,IFT57,DYNC2H1,LDHA,WDPCP,IFT52,BBS7
GO: Cellular Component	GO:0000778	condensed nuclear chromosome kinetochore		6.801e-06	0.006842	0.0001267	0.0009492	7	16	MIS18BP1,NDC80,CENPK,BUB1,BUB1B,PLK1,NUF2
GO: Cellular Component	GO:0005721	pericentric heterochromatin		7.627e-06	0.007673	0.000138	0.001033	8	22	ATRX,CBX1,NCAPD3,KMT5C,HELLS,CBX3,INCENP,ESCO2
GO: Cellular Component	GO:0061695	transferase complex, transferring phosphorus-containing groups		7.679e-06	0.007725	0.000138	0.001033	33	281	ERCC1,ERCC2,MCM3,TRRAP,POLR1B,TADA3,PIK3R3,TONSL,CCNA2,CCNF,CCNG1,CCNB2,CDK1,PCNA,POLA2,PHKA2,CKS1B,CKS2,PIK3CD,PKM,POLR1A,GTF2H2C,POLD1,POLE2,POLR2L,PAF1,PRIM1,PRIM2,PRKAR1A,IRS1,DNA2,WDR41,RPA3
GO: Cellular Component	GO:0099512	supramolecular fiber		8.001e-06	0.008049	0.0001412	0.001058	116	1521	NUSAP1,KIF18A,MAP9,ACTA1,KATNAL1,TENM2,ADD3,TUBA1B,TUBB4B,DLC1,MYL9,FAM161A,NME5,LRRC7,CAMSAP1,RSPH9,FLNA,ANGPT1,IFT81,GTSE1,TUBB,APBB1,SLC34A2,BIRC5,CCT7,NLGN1,SHROOM2,SPAG5,PDLIM4,MSN,WDR47,ARHGAP4,HAUS1,CCT5,TRIM32,FRG1,MYO1F,TPX2,SNTB2,MYBPC2,CLUAP1,ATP7A,CENPJ,SPTBN1,TOGARAM1,AURKA,NME2,PSRC1,KIF2C,CALB2,RPGRIP1L,ABHD2,TUBA1C,ODF2,RABL2B,PDLIM1,CDK1,SKA1,DCTN3,AURKB,EXOC4,TMEM67,CENPF,CORO1C…
GO: Cellular Component	GO:0019866	organelle inner membrane		8.532e-06	0.008584	0.000148	0.001109	56	596	MRPL23,MTG1,ACAT1,MDH2,MTCO2P12,MRPS17,TIMM44,FOXRED1,MRPL13,MRPL28,CHCHD6,TIMM21,SLC25A39,ATP5F1D,ATP5MC1,ATP5MC3,DPY19L3,ATP5PO,NDUFA4,NDUFA9,SUCLG1,COQ2,NDUFB3,NDUFS6,GLUD1,UQCR11,TMEM177,TAMM41,CYCS,TMPO,HSD17B10,HADH,PC,CBX3,TST,SLC25A23,COX6C,MRPS26,FAM169A,MRPS9,MRPL36,MRPL11,MRPL1,ITPR1,MRPL16,COQ8A,ALDH18A1,MCUB,LBR,MRPL4,LRPPRC,ATAD3B,TRAP1,TIMM10,LMNB1,EMD
GO: Cellular Component	GO:0099081	supramolecular polymer		9.865e-06	0.009924	0.0001682	0.00126	116	1528	NUSAP1,KIF18A,MAP9,ACTA1,KATNAL1,TENM2,ADD3,TUBA1B,TUBB4B,DLC1,MYL9,FAM161A,NME5,LRRC7,CAMSAP1,RSPH9,FLNA,ANGPT1,IFT81,GTSE1,TUBB,APBB1,SLC34A2,BIRC5,CCT7,NLGN1,SHROOM2,SPAG5,PDLIM4,MSN,WDR47,ARHGAP4,HAUS1,CCT5,TRIM32,FRG1,MYO1F,TPX2,SNTB2,MYBPC2,CLUAP1,ATP7A,CENPJ,SPTBN1,TOGARAM1,AURKA,NME2,PSRC1,KIF2C,CALB2,RPGRIP1L,ABHD2,TUBA1C,ODF2,RABL2B,PDLIM1,CDK1,SKA1,DCTN3,AURKB,EXOC4,TMEM67,CENPF,CORO1C…
GO: Cellular Component	GO:0099080	supramolecular complex		1.047e-05	0.01053	0.0001755	0.001315	116	1530	NUSAP1,KIF18A,MAP9,ACTA1,KATNAL1,TENM2,ADD3,TUBA1B,TUBB4B,DLC1,MYL9,FAM161A,NME5,LRRC7,CAMSAP1,RSPH9,FLNA,ANGPT1,IFT81,GTSE1,TUBB,APBB1,SLC34A2,BIRC5,CCT7,NLGN1,SHROOM2,SPAG5,PDLIM4,MSN,WDR47,ARHGAP4,HAUS1,CCT5,TRIM32,FRG1,MYO1F,TPX2,SNTB2,MYBPC2,CLUAP1,ATP7A,CENPJ,SPTBN1,TOGARAM1,AURKA,NME2,PSRC1,KIF2C,CALB2,RPGRIP1L,ABHD2,TUBA1C,ODF2,RABL2B,PDLIM1,CDK1,SKA1,DCTN3,AURKB,EXOC4,TMEM67,CENPF,CORO1C…
GO: Cellular Component	GO:0034709	methylosome		1.245e-05	0.01252	0.0002052	0.001538	6	12	ERH,SNRPB,SNRPD1,SNRPF,PRMT1,WDR77
GO: Cellular Component	GO:0000796	condensin complex		1.7e-05	0.0171	0.0002758	0.002066	5	8	SMC2,NCAPG,NCAPD3,NCAPH,NCAPG2
GO: Cellular Component	GO:0042575	DNA polymerase complex		1.907e-05	0.01918	0.0003044	0.002281	10	39	MCM3,TONSL,PCNA,POLA2,POLD1,POLE2,PRIM1,PRIM2,DNA2,RPA3
GO: Cellular Component	GO:0016604	nuclear body		2.596e-05	0.02612	0.0004027	0.003017	68	799	FBL,RBM10,JADE1,TENM2,FANCD2,RMI1,RBM14,MRE11,SRSF1,SRSF7,NACC1,APBB1,APEX1,OSGEP,WDR19,MTOR,FRG1,CENPI,MYC,ATRX,HNRNPM,LHPP,PSME4,DBF4,TONSL,TCF7,ICE1,ZNF496,OGG1,ZWINT,EXO1,H2AX,PCNA,OIP5,HNRNPA2B1,CBY1,GTF2H2C,POLE2,RMI2,GEMIN5,XPO1,PPP1CC,THOC6,SETBP1,MRPL36,HAUS6,PCGF2,ACD,INCENP,EIF4A3,ZNF217,NCAPG2,DHX9,TELO2,USP7,SGO2,CDT1,GNL3,KIF22,RAD51,SMC6,DPP3,ZMIZ1,WRAP53,SUGP2,ALYREF,RP9,DDX39A
GO: Cellular Component	GO:0005840	ribosome		2.602e-05	0.02618	0.0004027	0.003017	33	298	MRPL23,MTG1,RPL34,RPL36A,RPS2,RPS7,RPS10,RPL39L,NUFIP1,MCTS2P,RACK1,MRPS17,RPL22L1,MRPL13,APEX1,MRPL28,GADD45GIP1,EIF3B,LARP1,GEMIN5,MRPS26,MRPS9,MRPL36,MRPL11,MRPL1,DHX9,MRPL16,RPSA,MRPL4,HSPA14,RPL7,RPL8,RPL17
GO: Cellular Component	GO:0005740	mitochondrial envelope		2.7e-05	0.02717	0.0004116	0.003084	68	800	MRPL23,MTG1,ACAT1,ABHD6,COA4,MDH2,NLN,MTCO2P12,MRPS17,TIMM44,FOXRED1,FLVCR1,MRPL13,MRPL28,CHCHD6,ARL2,TIMM21,MTOR,SLC25A39,GABBR1,SOD1,ATP5F1D,LYRM7,ATP5MC1,ATP5MC3,ATP5PO,CISD1,BLOC1S1,NDUFA4,NDUFA9,SUCLG1,COQ2,NDUFB3,NDUFS6,BIK,BPHL,GLUD1,VAMP1,NME2,UQCR11,RTN4IP1,TMEM177,SLC44A1,TAMM41,CYCS,HSD17B10,HADH,PC,TST,SLC25A23,COX6C,ATF2,PPP1CC,MRPS26,MRPS9,MRPL36,MRPL11,MRPL1,MRPL16,COQ8A,ALDH18A1,M…
GO: Cellular Component	GO:0032133	chromosome passenger complex		3.257e-05	0.03277	0.0004819	0.00361	4	5	BIRC5,AURKA,AURKB,CDCA8
GO: Cellular Component	GO:0005658	alpha DNA polymerase:primase complex		3.257e-05	0.03277	0.0004819	0.00361	4	5	MCM3,POLA2,PRIM1,PRIM2
GO: Cellular Component	GO:0044391	ribosomal subunit		4.169e-05	0.04194	0.000597	0.004472	26	215	MRPL23,RPL34,RPL36A,RPS2,RPS7,RPS10,RPL39L,MCTS2P,RACK1,MRPS17,RPL22L1,MRPL13,MRPL28,EIF3B,GEMIN5,MRPS26,MRPS9,MRPL36,MRPL11,MRPL1,MRPL16,RPSA,MRPL4,RPL7,RPL8,RPL17
GO: Cellular Component	GO:0035869	ciliary transition zone		4.201e-05	0.04226	0.000597	0.004472	17	110	TTC26,FAM161A,FAM92A,CC2D2A,CFAP36,WDR19,SUFU,CLUAP1,RPGRIP1L,B9D2,TMEM67,CETN3,PRKAR1A,TMEM231,TCTN1,IFT57,IFT52
GO: Cellular Component	GO:0030894	replisome		4.213e-05	0.04238	0.000597	0.004472	8	27	MCM3,TONSL,PCNA,POLA2,POLD1,PRIM1,PRIM2,RPA3
GO: Cellular Component	GO:0033202	DNA helicase complex		4.773e-05	0.04802	0.0006669	0.004996	10	43	MCM3,ACTL6A,RUVBL1,TONSL,PCNA,POLA2,POLD1,PRIM1,PRIM2,RPA3
GO: Cellular Component	GO:0043209	myelin sheath		0.0001022	0.1028	0.001408	0.01055	25	214	MDH1,MDH2,TUBA1B,TUBB4B,MSN,CCT5,ATP1B1,SOD1,ATP5PO,GAPDH,SRD5A1,GPI,CYCS,PARD3,EXOC4,PGAM1,CKB,UCHL1,PKM,PACSIN1,PPIA,RAP1A,LDHB,GNB4,ENO1
GO: Cellular Component	GO:0016363	nuclear matrix		0.0001036	0.1042	0.001409	0.01055	17	118	ZNF326,CENPW,MAT1A,SMC1A,NUFIP1,ARFGEF1,RUVBL1,HNRNPM,SATB2,CAD,OGG1,CENPF,HNRNPA2B1,NSMF,KIF4A,RGS12,LMNB1
GO: Cellular Component	GO:0120038	plasma membrane bounded cell projection part		0.0001102	0.1108	0.001458	0.01092	126	1784	USP9X,JADE1,TENM2,IFT43,TTC26,TBC1D24,FZD4,DLC1,RACK1,FAM161A,FAM92A,NME5,CC2D2A,AKT2,LRRC7,IFT80,MERTK,RSPH9,FLNA,IFT74,PRSS12,CFAP36,IFT81,FERMT1,APBB1,SLC34A2,NLGN1,LYAR,KHSRP,PDLIM4,MSN,WDR19,ARHGAP4,MTOR,SLC18A3,TPX2,FUS,SUFU,MTMR9,GABBR1,SOD1,PHLPP2,ATP5MC1,GABRG3,CLUAP1,ATP7A,CENPJ,MYO9A,SPTBN1,TOGARAM1,BLOC1S1,NCDN,AURKA,BMPR1A,GPI,CAD,CALB2,RPGRIP1L,YBX1,ABHD2,PSD3,ARHGAP35,ODF2,ZWINT,CC…
GO: Cellular Component	GO:0044463	cell projection part		0.0001102	0.1108	0.001458	0.01092	126	1784	USP9X,JADE1,TENM2,IFT43,TTC26,TBC1D24,FZD4,DLC1,RACK1,FAM161A,FAM92A,NME5,CC2D2A,AKT2,LRRC7,IFT80,MERTK,RSPH9,FLNA,IFT74,PRSS12,CFAP36,IFT81,FERMT1,APBB1,SLC34A2,NLGN1,LYAR,KHSRP,PDLIM4,MSN,WDR19,ARHGAP4,MTOR,SLC18A3,TPX2,FUS,SUFU,MTMR9,GABBR1,SOD1,PHLPP2,ATP5MC1,GABRG3,CLUAP1,ATP7A,CENPJ,MYO9A,SPTBN1,TOGARAM1,BLOC1S1,NCDN,AURKA,BMPR1A,GPI,CAD,CALB2,RPGRIP1L,YBX1,ABHD2,PSD3,ARHGAP35,ODF2,ZWINT,CC…
GO: Cellular Component	GO:0005875	microtubule associated complex		0.0001236	0.1243	0.001615	0.0121	30	282	KIF18A,NME5,RSPH9,IFT81,BIRC5,HAUS1,AURKA,KIF2C,ABHD2,ODF2,RABL2B,DCTN3,AURKB,KIF23,HAUS6,NDE1,KIF4A,DCTN1,KIF15,KIF11,KIFC1,KIF22,RAN,HDAC6,WDR34,DYNC2H1,LDHA,CDCA8,KIF20A,DYNC1LI1
GO: Cellular Component	GO:1904949	ATPase complex		0.0001629	0.1639	0.002101	0.01574	16	111	ATAD5,MCM3,ACTL6A,TRRAP,MTA3,RUVBL1,SMARCA2,TONSL,PCNA,POLA2,POLD1,PRIM1,PRIM2,ANP32E,RFC4,RPA3
GO: Cellular Component	GO:0032993	protein-DNA complex		0.0001831	0.1842	0.002332	0.01747	25	222	H2AZ2,WDR18,MCM3,MCM10,ZRANB3,CDC45,GINS4,GINS2,SOX12,TONSL,TEAD4,H2AX,H2AZ1,PCNA,POLA2,POLD1,XRCC5,PRIM1,PRIM2,RBPJ,PRKDC,ACD,GINS1,MMS22L,RPA3
GO: Cellular Component	GO:0030687	preribosome, large subunit precursor		0.0001906	0.1917	0.002367	0.01773	7	25	WDR12,MAK16,BOP1,EBNA1BP2,PPAN,RRP15,MRTO4
GO: Cellular Component	GO:0043601	nuclear replisome		0.0001906	0.1917	0.002367	0.01773	7	25	MCM3,TONSL,POLA2,POLD1,PRIM1,PRIM2,RPA3
GO: Cellular Component	GO:0005635	nuclear envelope		0.0001985	0.1996	0.002435	0.01824	45	503	BRIP1,NUP85,SHISA5,DTL,TUBB,NUP35,SEPHS1,NDC1,NUDT1,CEP70,CACYBP,SORL1,MYC,DPY19L3,GAPDH,NUP205,WDR3,TXNL4A,RRP12,YBX1,TMPO,CENPF,CETN3,CBX3,SMOX,AKAP6,EI24,XPO1,NSMF,FAM169A,DCTN1,ENY2,ITPR1,CERS4,KPNA3,IPO5,RAN,RANBP1,E2F5,LBR,LRPPRC,LMNB1,JPT1,EMD,MAD2L1
GO: Cellular Component	GO:0005743	mitochondrial inner membrane		0.0002198	0.2211	0.002664	0.01996	47	535	MRPL23,MTG1,ACAT1,MDH2,MTCO2P12,MRPS17,TIMM44,FOXRED1,MRPL13,MRPL28,CHCHD6,TIMM21,SLC25A39,ATP5F1D,ATP5MC1,ATP5MC3,ATP5PO,NDUFA4,NDUFA9,SUCLG1,COQ2,NDUFB3,NDUFS6,GLUD1,UQCR11,TMEM177,TAMM41,CYCS,HSD17B10,HADH,PC,TST,SLC25A23,COX6C,MRPS26,MRPS9,MRPL36,MRPL11,MRPL1,MRPL16,COQ8A,ALDH18A1,MCUB,MRPL4,ATAD3B,TRAP1,TIMM10
GO: Cellular Component	GO:0044452	nucleolar part		0.0002599	0.2614	0.003112	0.02331	24	214	MRPL23,FBL,RPS7,NUFIP1,EMG1,POLR1B,TBL3,WDR12,WDR43,WDR3,POP1,BOP1,TCOF1,RRP9,ORC6,TFCP2L1,PRMT7,POLR1A,POLR2L,BMS1,URB1,E2F5,HEATR1,EEF1D
GO: Cellular Component	GO:0031616	spindle pole centrosome		0.0002683	0.2699	0.003175	0.02379	6	19	AURKA,CEP250,AURKB,NDE1,DLGAP5,EMD
GO: Cellular Component	GO:0031966	mitochondrial membrane		0.0002882	0.2899	0.003371	0.02525	61	756	MRPL23,MTG1,ACAT1,ABHD6,MDH2,MTCO2P12,MRPS17,TIMM44,FOXRED1,FLVCR1,MRPL13,MRPL28,CHCHD6,TIMM21,MTOR,SLC25A39,GABBR1,ATP5F1D,LYRM7,ATP5MC1,ATP5MC3,ATP5PO,CISD1,NDUFA4,NDUFA9,SUCLG1,COQ2,NDUFB3,NDUFS6,BIK,BPHL,GLUD1,VAMP1,NME2,UQCR11,RTN4IP1,TMEM177,SLC44A1,TAMM41,CYCS,HSD17B10,HADH,PC,TST,SLC25A23,COX6C,ATF2,PPP1CC,MRPS26,MRPS9,MRPL36,MRPL11,MRPL1,MRPL16,COQ8A,ALDH18A1,MCUB,MRPL4,ATAD3B,TRAP1,TIMM…
GO: Cellular Component	GO:0031965	nuclear membrane		0.0003266	0.3286	0.003777	0.02829	31	312	BRIP1,NUP85,SHISA5,DTL,NUP35,SEPHS1,NDC1,NUDT1,CEP70,DPY19L3,GAPDH,NUP205,WDR3,TXNL4A,RRP12,YBX1,TMPO,CBX3,SMOX,AKAP6,EI24,XPO1,NSMF,FAM169A,ITPR1,CERS4,LBR,LRPPRC,LMNB1,JPT1,EMD
GO: Cellular Component	GO:0098798	mitochondrial protein complex		0.0003319	0.3339	0.003794	0.02842	28	271	MRPL23,MTG1,MRPS17,FOXRED1,MRPL13,MRPL28,CHCHD6,TIMM21,ATP5F1D,ATP5MC1,ATP5MC3,ATP5PO,NDUFA4,NDUFA9,SUCLG1,NDUFB3,NDUFS6,HSD17B10,MRPS26,MRPS9,MRPL36,MRPL11,MRPL1,MRPL16,DNA2,MCUB,MRPL4,TIMM10
GO: Cellular Component	GO:0090734	site of DNA damage		0.0003484	0.3505	0.003939	0.02951	12	74	MRE11,CBX1,H2AX,CBX3,AUNIP,XRCC5,ATF2,RAD51,SMC6,WRAP53,ESCO2,RPA3
GO: Cellular Component	GO:0031298	replication fork protection complex		0.0004024	0.4049	0.004498	0.0337	4	8	MCM10,CDC45,GINS4,GINS2
GO: Cellular Component	GO:0034455	t-UTP complex		0.0004174	0.4199	0.004615	0.03457	10	55	FBL,RPS7,EMG1,TBL3,WDR12,WDR3,BOP1,RRP9,BMS1,HEATR1
GO: Cellular Component	GO:0036038	MKS complex		0.0004695	0.4723	0.005133	0.03846	5	14	CC2D2A,B9D2,TMEM67,TMEM231,TCTN1
GO: Cellular Component	GO:0005871	kinesin complex		0.0004852	0.4881	0.005211	0.03904	10	56	KIF18A,KIF2C,KIF23,NDE1,KIF4A,KIF15,KIF11,KIFC1,KIF22,KIF20A
GO: Cellular Component	GO:0022626	cytosolic ribosome		0.0004869	0.4899	0.005211	0.03904	17	134	RPL34,RPL36A,RPS2,RPS7,RPS10,RPL39L,NUFIP1,MCTS2P,RACK1,RPL22L1,EIF3B,GEMIN5,MRPL1,RPSA,RPL7,RPL8,RPL17
GO: Cellular Component	GO:0031262	Ndc80 complex		0.0005126	0.5157	0.005262	0.03942	3	4	SPC25,NDC80,NUF2
GO: Cellular Component	GO:0000942	condensed nuclear chromosome outer kinetochore		0.0005126	0.5157	0.005262	0.03942	3	4	NDC80,BUB1,PLK1
GO: Cellular Component	GO:0031617	NMS complex		0.0005126	0.5157	0.005262	0.03942	3	4	SPC25,NDC80,NUF2
GO: Cellular Component	GO:0035101	FACT complex		0.0005126	0.5157	0.005262	0.03942	3	4	SSRP1,TONSL,MMS22L
GO: Cellular Component	GO:0000803	sex chromosome		0.0005628	0.5662	0.005719	0.04285	8	38	SCML2,PLK4,H2AX,H2AZ1,PCGF2,USP7,SMC6,ESCO2
GO: Cellular Component	GO:0015934	large ribosomal subunit		0.0006387	0.6426	0.006426	0.04814	16	125	MRPL23,RPL34,RPL36A,RPL39L,RPL22L1,MRPL13,MRPL28,GEMIN5,MRPL36,MRPL11,MRPL1,MRPL16,MRPL4,RPL7,RPL8,RPL17
GO: Cellular Component	GO:0005652	nuclear lamina		0.0006747	0.6787	0.00672	0.05034	5	15	NUP35,PCNA,LBR,LMNB1,EMD
GO: Cellular Component	GO:0001739	sex chromatin		0.0009758	0.9817	0.009624	0.0721	7	32	SCML2,PLK4,H2AX,H2AZ1,PCGF2,USP7,ESCO2
GO: Cellular Component	GO:0031618	nuclear pericentric heterochromatin		0.001112	1	0.01086	0.08134	4	10	ATRX,NCAPD3,CBX3,ESCO2
GO: Cellular Component	GO:0044445	cytosolic part		0.001133	1	0.01096	0.08213	28	293	RPL34,RPL36A,RPS2,RPS7,RPS10,RPL39L,NUFIP1,MCTS2P,RACK1,RPL22L1,CCT7,CCT5,MTOR,EIF3B,BLOC1S1,CALB2,HNRNPA2B1,HNRNPAB,SGTB,GEMIN5,MRPL1,EIF4A3,DHX33,RPSA,ENO1,RPL7,RPL8,RPL17
GO: Cellular Component	GO:0031970	organelle envelope lumen		0.001303	1	0.01248	0.09351	13	97	COA4,NLN,TUBB,ARL2,CACYBP,SOD1,SORL1,BLOC1S1,CYCS,COA7,DTYMK,TRAP1,TIMM10
GO: Cellular Component	GO:0000307	cyclin-dependent protein kinase holoenzyme complex		0.001331	1	0.01252	0.09376	8	43	CCNA2,CCNF,CCNG1,CCNB2,CDK1,PCNA,CKS1B,CKS2
GO: Cellular Component	GO:0000152	nuclear ubiquitin ligase complex		0.001331	1	0.01252	0.09376	8	43	BRCA1,BUB1B,UBE2S,UBE2C,CDC20,ANAPC4,PCGF2,BCOR
GO: Cellular Component	GO:0005681	spliceosomal complex		0.001378	1	0.01284	0.09616	20	186	TTF2,SRSF1,FRG1,SNRPA,SNRPB,SNRPD1,SNRPF,HNRNPM,TXNL4A,RBMX,YBX1,LSM6,HNRNPA1,LSM5,HNRNPA2B1,SF3B5,EIF4A3,SNRNP25,HNRNPA3,ALYREF
GO: Cellular Component	GO:0043657	host cell		0.001434	1	0.01312	0.09827	11	75	NUP85,NUP35,NDC1,AXL,NUP205,TOP2A,XPO1,KPNA2,KPNA3,RAN,VPS28
GO: Cellular Component	GO:0018995	host cellular component		0.001434	1	0.01312	0.09827	11	75	NUP85,NUP35,NDC1,AXL,NUP205,TOP2A,XPO1,KPNA2,KPNA3,RAN,VPS28
GO: Cellular Component	GO:0097539	ciliary transition fiber		0.001533	1	0.01378	0.1032	9	54	TTC26,FAM92A,CFAP36,SUFU,CLUAP1,ODF2,CENPF,PRKAR1A,IFT52
GO: Cellular Component	GO:0071013	catalytic step 2 spliceosome		0.001534	1	0.01378	0.1032	12	87	SRSF1,FRG1,SNRPB,SNRPD1,SNRPF,HNRNPM,RBMX,HNRNPA1,HNRNPA2B1,EIF4A3,HNRNPA3,ALYREF
GO: Cellular Component	GO:0098578	condensed chromatin of inactivated sex chromosome		0.001675	1	0.01491	0.1117	6	26	SCML2,PLK4,H2AX,H2AZ1,USP7,ESCO2
GO: Cellular Component	GO:0005682	U5 snRNP		0.001716	1	0.01515	0.1135	16	137	SRSF1,FRG1,SNRPB,SNRPD1,SNRPF,HNRNPM,TXNL4A,RBMX,LSM6,HNRNPA1,LSM5,HNRNPA2B1,SF3B5,EIF4A3,HNRNPA3,ALYREF
GO: Cellular Component	GO:1902911	protein kinase complex		0.001864	1	0.0163	0.1221	14	113	ERCC2,CCNA2,CCNF,CCNG1,CCNB2,CDK1,PCNA,PHKA2,CKS1B,CKS2,GTF2H2C,PRKAR1A,IRS1,WDR41
GO: Cellular Component	GO:0051233	spindle midzone		0.002026	1	0.01742	0.1305	7	36	KIF18A,MAP9,AURKA,CDC6,AURKB,PLK1,CDCA8
GO: Cellular Component	GO:0005719	nuclear euchromatin		0.002026	1	0.01742	0.1305	7	36	MYC,RBMX,TCF7,H2AZ1,CBX3,NSMF,TRIM28
GO: Cellular Component	GO:0005689	U12-type spliceosomal complex		0.002061	1	0.01743	0.1305	6	27	SNRPB,SNRPD1,SNRPF,YBX1,SF3B5,SNRNP25
GO: Cellular Component	GO:0098577	inactive sex chromosome		0.002061	1	0.01743	0.1305	6	27	SCML2,PLK4,H2AX,H2AZ1,USP7,ESCO2
GO: Cellular Component	GO:0001741	XY body		0.002203	1	0.01846	0.1383	5	19	SCML2,PLK4,H2AX,USP7,ESCO2
GO: Cellular Component	GO:0000313	organellar ribosome		0.002265	1	0.01853	0.1388	12	91	MRPL23,MTG1,MRPS17,MRPL13,MRPL28,MRPS26,MRPS9,MRPL36,MRPL11,MRPL1,MRPL16,MRPL4
GO: Cellular Component	GO:1902554	serine/threonine protein kinase complex		0.002265	1	0.01853	0.1388	12	91	ERCC2,CCNA2,CCNF,CCNG1,CCNB2,CDK1,PCNA,PHKA2,CKS1B,CKS2,GTF2H2C,WDR41
GO: Cellular Component	GO:0005761	mitochondrial ribosome		0.002265	1	0.01853	0.1388	12	91	MRPL23,MTG1,MRPS17,MRPL13,MRPL28,MRPS26,MRPS9,MRPL36,MRPL11,MRPL1,MRPL16,MRPL4
GO: Cellular Component	GO:0071204	histone pre-mRNA 3'end processing complex		0.00237	1	0.01923	0.144	3	6	SNRPB,YBX1,SLBP
GO: Cellular Component	GO:0044615	nuclear pore nuclear basket		0.002414	1	0.01927	0.1444	4	12	NUP35,CETN3,ENY2,MAD2L1
GO: Cellular Component	GO:0005818	aster		0.002414	1	0.01927	0.1444	4	12	KIF18A,MAP9,FAM161A,TPX2
GO: Cellular Component	GO:0005643	nuclear pore		0.002487	1	0.0197	0.1476	12	92	NUP85,NUP35,NDC1,NUP205,CETN3,ENY2,KPNA3,IPO5,RAN,RANBP1,LBR,MAD2L1
GO: Cellular Component	GO:1990077	primosome complex		0.002758	1	0.02168	0.1624	2	2	PRIM1,PRIM2
GO: Cellular Component	GO:0032040	small-subunit processome		0.002802	1	0.02185	0.1637	7	38	FBL,RPS7,EMG1,TBL3,WDR3,RRP9,HEATR1
GO: Cellular Component	GO:0000974	Prp19 complex		0.002982	1	0.02308	0.1729	12	94	SRSF1,FRG1,SNRPB,SNRPD1,SNRPF,HNRNPM,RBMX,HNRNPA1,HNRNPA2B1,EIF4A3,HNRNPA3,ALYREF
GO: Cellular Component	GO:0005732	small nucleolar ribonucleoprotein complex		0.003032	1	0.02328	0.1744	6	29	FBL,NAF1,SNRPF,POP1,LSM6,RRP9
GO: Cellular Component	GO:0005637	nuclear inner membrane		0.003244	1	0.0247	0.185	9	60	DPY19L3,TMPO,CBX3,FAM169A,ITPR1,LBR,LRPPRC,LMNB1,EMD
GO: Cellular Component	GO:0005844	polysome		0.003265	1	0.0247	0.185	11	83	RPL36A,NAA38,FUS,LARP1,DHX9,LIN28A,DAZAP1,HSPA14,RPL7,RPL8,RPL17
GO: Cellular Component	GO:0055029	nuclear DNA-directed RNA polymerase complex		0.003441	1	0.02583	0.1935	13	108	ERCC1,ERCC2,MCM3,TRRAP,POLR1B,TADA3,POLA2,POLR1A,GTF2H2C,POLR2L,PAF1,PRIM1,PRIM2
GO: Cellular Component	GO:0097431	mitotic spindle pole		0.003629	1	0.02704	0.2026	6	30	SMC1A,FAM161A,SPAG5,AURKA,AURKB,FAM83D
GO: Cellular Component	GO:0000428	DNA-directed RNA polymerase complex		0.003729	1	0.02758	0.2066	13	109	ERCC1,ERCC2,MCM3,TRRAP,POLR1B,TADA3,POLA2,POLR1A,GTF2H2C,POLR2L,PAF1,PRIM1,PRIM2
GO: Cellular Component	GO:0031931	TORC1 complex		0.00399	1	0.0293	0.2195	3	7	MTOR,LARP1,TELO2
GO: Cellular Component	GO:1990904	ribonucleoprotein complex		0.004193	1	0.03057	0.229	100	1508	MRPL23,MTG1,RPL34,RPL36A,FBL,RPS2,RPS7,RPS10,RPL39L,NUFIP1,MCTS2P,RACK1,MRPS17,NAF1,RBM14,EMG1,RPL22L1,TTF2,SRSF1,TUBB,ARFGEF1,MRPL13,APEX1,MRPL28,NAA38,TBL3,GADD45GIP1,KHSRP,RUVBL1,TSR1,FRG1,WDR12,EIF3B,FUS,SNRPA,SNRPB,SNRPD1,SNRPF,GAPDH,HNRNPM,MAK16,SSB,WDR3,TXNL4A,BRCA1,RBMX,POP1,TNRC6A,BOP1,EBNA1BP2,YBX1,LARP1,GRSF1,LSM6,TIA1,PA2G4,RRP9,HSD17B10,TOP2A,PPAN,HNRNPA1,LSM5,HNRNPA2B1,HNRNPAB,L1TD1…
GO: Cellular Component	GO:0005680	anaphase-promoting complex		0.004392	1	0.03178	0.2381	5	22	BUB1B,UBE2S,UBE2C,CDC20,ANAPC4
GO: Cellular Component	GO:0030880	RNA polymerase complex		0.005475	1	0.03934	0.2947	13	114	ERCC1,ERCC2,MCM3,TRRAP,POLR1B,TADA3,POLA2,POLR1A,GTF2H2C,POLR2L,PAF1,PRIM1,PRIM2
GO: Cellular Component	GO:0022625	cytosolic large ribosomal subunit		0.005593	1	0.03991	0.299	9	65	RPL34,RPL36A,RPL39L,RPL22L1,GEMIN5,MRPL1,RPL7,RPL8,RPL17
GO: Cellular Component	GO:0120114	Sm-like protein family complex		0.005673	1	0.04019	0.3011	19	196	SRSF1,ARFGEF1,FRG1,SNRPA,SNRPB,SNRPD1,SNRPF,HNRNPM,TXNL4A,RBMX,LSM6,HNRNPA1,LSM5,HNRNPA2B1,GEMIN5,SF3B5,EIF4A3,HNRNPA3,ALYREF
GO: Cellular Component	GO:0030686	90S preribosome		0.005942	1	0.0418	0.3132	6	33	TBL3,WDR12,WDR3,BOP1,BMS1,HEATR1
GO: Cellular Component	GO:0031390	Ctf18 RFC-like complex		0.006143	1	0.04291	0.3215	3	8	DSCC1,RFC4,RFC5
GO: Cellular Component	GO:1902562	H4 histone acetyltransferase complex		0.006526	1	0.04497	0.3369	7	44	ACTL6A,TRRAP,TADA3,RUVBL1,MSL3,WDR5,KANSL1L
GO: Cellular Component	GO:0097546	ciliary base		0.006526	1	0.04497	0.3369	7	44	TTC26,FAM92A,CFAP36,SUFU,CLUAP1,PRKAR1A,IFT52
GO: Cellular Component	GO:0030532	small nuclear ribonucleoprotein complex		0.006717	1	0.04597	0.3444	18	185	SRSF1,ARFGEF1,FRG1,SNRPA,SNRPB,SNRPD1,SNRPF,HNRNPM,TXNL4A,RBMX,LSM6,HNRNPA1,LSM5,HNRNPA2B1,SF3B5,EIF4A3,HNRNPA3,ALYREF
GO: Cellular Component	GO:0000799	nuclear condensin complex		0.007571	1	0.04978	0.3729	2	3	NCAPD3,NCAPH
GO: Cellular Component	GO:0097149	centralspindlin complex		0.007571	1	0.04978	0.3729	2	3	KIF23,ECT2
GO: Cellular Component	GO:0018444	translation release factor complex		0.007571	1	0.04978	0.3729	2	3	GSPT1,GSPT2
GO: Cellular Component	GO:0031391	Elg1 RFC-like complex		0.007571	1	0.04978	0.3729	2	3	ATAD5,RFC4
GO: Cellular Component	GO:0031074	nucleocytoplasmic transport complex		0.007571	1	0.04978	0.3729	2	3	MYBBP1A,RAN
GO: Cellular Component	GO:1990423	RZZ complex		0.007571	1	0.04978	0.3729	2	3	KNTC1,ZWILCH
Domain	PS50051	MCM_2	PROSITE	7.419e-07	0.00327	0.0008174	0.007331	6	8	MCM2,MCM3,MCM5,MCM6,MCM7,MCM8
Domain	PS00847	MCM_1	PROSITE	7.419e-07	0.00327	0.0008174	0.007331	6	8	MCM2,MCM3,MCM5,MCM6,MCM7,MCM8
Domain	PF17207	MCM_OB	Pfam	7.419e-07	0.00327	0.0008174	0.007331	6	8	MCM2,MCM3,MCM5,MCM6,MCM7,MCM8
Domain	IPR033762	MCM_OB	InterPro	7.419e-07	0.00327	0.0008174	0.007331	6	8	MCM2,MCM3,MCM5,MCM6,MCM7,MCM8
Domain	IPR001208	MCM_dom	InterPro	2.12e-06	0.009345	0.001168	0.01048	6	9	MCM2,MCM3,MCM5,MCM6,MCM7,MCM8
Domain	IPR031327	MCM	InterPro	2.12e-06	0.009345	0.001168	0.01048	6	9	MCM2,MCM3,MCM5,MCM6,MCM7,MCM8
Domain	SM00350	MCM	SMART	2.12e-06	0.009345	0.001168	0.01048	6	9	MCM2,MCM3,MCM5,MCM6,MCM7,MCM8
Domain	PF00493	MCM	Pfam	2.12e-06	0.009345	0.001168	0.01048	6	9	MCM2,MCM3,MCM5,MCM6,MCM7,MCM8
Domain	PF14551	MCM_N	Pfam	3.02e-06	0.01331	0.00121	0.01085	5	6	MCM2,MCM3,MCM5,MCM6,MCM7
Domain	IPR018525	MCM_CS	InterPro	3.02e-06	0.01331	0.00121	0.01085	5	6	MCM2,MCM3,MCM5,MCM6,MCM7
Domain	IPR027925	MCM_N	InterPro	3.02e-06	0.01331	0.00121	0.01085	5	6	MCM2,MCM3,MCM5,MCM6,MCM7
Domain	IPR017986	WD40_repeat_dom	InterPro	3.748e-06	0.01652	0.001377	0.01235	37	297	CHAF1B,WDR18,WDR54,RACK1,IFT80,DTL,NBEA,TBL3,WDR47,WDR19,WDR12,WDR4,WDR43,WDR3,NBEAL2,BOP1,WDR5,RRP9,LRBA,CDC20,CORO1C,NLE1,WDR77,ANAPC4,GEMIN5,SEC31B,THOC6,TBC1D31,ARHGEF10,KNTC1,PAK1IP1,WDR34,WRAP53,WDPCP,BBS7,GNB4,WDR41
Domain	PS00678	WD_REPEATS_1	PROSITE	5.377e-06	0.02369	0.001712	0.01535	35	278	CHAF1B,WDR18,WDR54,RACK1,IFT80,DTL,NBEA,TBL3,WDR47,WDR19,WDCP,WDR12,EIF3B,WDR4,WDR43,WDR3,NBEAL2,BOP1,WDR5,RRP9,LRBA,CDC20,CORO1C,NLE1,WDR77,GEMIN5,SEC31B,THOC6,TBC1D31,PAK1IP1,WDR34,WRAP53,WDPCP,GNB4,WDR41
Domain	PS50294	WD_REPEATS_REGION	PROSITE	5.827e-06	0.02568	0.001712	0.01535	35	279	CHAF1B,WDR18,WDR54,RACK1,IFT80,DTL,NBEA,TBL3,WDR47,WDR19,WDCP,WDR12,EIF3B,WDR4,WDR43,WDR3,NBEAL2,BOP1,WDR5,RRP9,LRBA,CDC20,CORO1C,NLE1,WDR77,GEMIN5,SEC31B,THOC6,TBC1D31,PAK1IP1,WDR34,WRAP53,WDPCP,GNB4,WDR41
Domain	PS50082	WD_REPEATS_2	PROSITE	5.827e-06	0.02568	0.001712	0.01535	35	279	CHAF1B,WDR18,WDR54,RACK1,IFT80,DTL,NBEA,TBL3,WDR47,WDR19,WDCP,WDR12,EIF3B,WDR4,WDR43,WDR3,NBEAL2,BOP1,WDR5,RRP9,LRBA,CDC20,CORO1C,NLE1,WDR77,GEMIN5,SEC31B,THOC6,TBC1D31,PAK1IP1,WDR34,WRAP53,WDPCP,GNB4,WDR41
Domain	3.40.50.720	-	Gene3D	7.274e-06	0.03206	0.002003	0.01797	25	169	MDH1,MDH2,ADH5,MTHFD1,PECR,GAPDH,NDUFA9,SUCLG1,GLUD1,MAT2B,RTN4IP1,CBR4,HSD17B10,HADH,UBA1,BDH2,DECR1,MDH1B,PYCR3,LDHA,LDHB,MECR,EHHADH,STEAP3,HSD17B11
Domain	IPR011989	ARM-like	InterPro	7.868e-06	0.03467	0.002037	0.01827	34	271	HGH1,USP9X,TRRAP,ARFGEF1,NBEA,PELP1,MTOR,CEP70,STK36,SAAL1,TOGARAM1,NCAPG,PSME4,NBEAL2,RRP12,NCAPD3,DAAM2,LRBA,HMGB1,ARMC6,XPO1,SPAG6,PRKDC,STKLD1,NCAPG2,NOP9,TELO2,TTC12,HEATR3,KPNA2,KPNA3,IPO5,HEATR1,HUWE1
Domain	IPR027417	P-loop_NTPase	InterPro	8.32e-06	0.03667	0.002037	0.01827	78	849	RAB19,KIF18A,MTG1,ERCC2,BRIP1,ATAD5,SMC1A,MCM2,MCM3,MCM5,MCM6,MCM7,RRAGB,KATNAL1,ZRANB3,EHD2,RAD54L,TTF2,ABCC1,MAGI3,MSH2,CMSS1,SMC2,FANCM,ARF5,ARL2,RUVBL1,MTHFD1,MYO1F,SMARCA2,CARD11,ATRX,MCM8,MYO9A,MDN1,DDX18,GTPBP3,KIF2C,ARHGAP35,GSPT1,RABL2B,TJP1,TK1,CDC6,HELLS,TRIP13,GSPT2,RECQL4,RAD54B,ABCC2,RAB26,KIF23,IFT22,ERCC6L,EIF4A3,BMS1,KIF4A,DHX33,DHX9,KIF15,DNA2,GNL3,KIF11,KIFC1,KIF22,RAD51,KRAS,R…
Domain	2.130.10.10	-	Gene3D	9.184e-06	0.04047	0.00213	0.0191	39	333	CHAF1B,WDR18,WDR54,RACK1,SEMA6A,IFT80,DTL,NBEA,TBL3,WDR47,WDR19,WDCP,WDR12,EIF3B,WDR4,WDR43,WDR3,NBEAL2,BOP1,WDR5,RRP9,LRBA,CDC20,CORO1C,NLE1,WDR77,ANAPC4,GEMIN5,SEC31B,THOC6,TBC1D31,ARHGEF10,PAK1IP1,WDR34,WRAP53,WDPCP,BBS7,GNB4,WDR41
Domain	IPR015943	WD40/YVTN_repeat-like_dom	InterPro	1.057e-05	0.04658	0.002317	0.02078	39	335	CHAF1B,WDR18,WDR54,RACK1,SEMA6A,IFT80,DTL,NBEA,TBL3,WDR47,WDR19,WDCP,WDR12,EIF3B,WDR4,WDR43,WDR3,NBEAL2,BOP1,WDR5,RRP9,LRBA,CDC20,CORO1C,NLE1,WDR77,ANAPC4,GEMIN5,SEC31B,THOC6,TBC1D31,ARHGEF10,PAK1IP1,WDR34,WRAP53,WDPCP,BBS7,GNB4,WDR41
Domain	IPR016040	NAD(P)-bd_dom	InterPro	1.104e-05	0.04867	0.002317	0.02078	25	173	MDH1,MDH2,ADH5,MTHFD1,PECR,GAPDH,NDUFA9,SUCLG1,GLUD1,MAT2B,RTN4IP1,CBR4,HSD17B10,HADH,UBA1,BDH2,DECR1,MDH1B,PYCR3,LDHA,LDHB,MECR,EHHADH,STEAP3,HSD17B11
Domain	IPR012340	NA-bd_OB-fold	InterPro	1.337e-05	0.0589	0.002677	0.02401	16	84	MCM2,MCM3,MCM5,MCM6,MCM7,MRPS17,MCM8,NARS1,SSBP1,YBX1,DDIAS,DARS1,LIN28A,LIG1,RPA3,RPL8
Domain	PF00400	WD40	Pfam	1.97e-05	0.0868	0.003774	0.03385	32	259	CHAF1B,WDR18,WDR54,RACK1,IFT80,DTL,NBEA,TBL3,WDR47,WDR19,WDR12,WDR4,WDR43,WDR3,NBEAL2,BOP1,WDR5,RRP9,LRBA,CDC20,CORO1C,NLE1,WDR77,GEMIN5,SEC31B,THOC6,TBC1D31,PAK1IP1,WDR34,WRAP53,GNB4,WDR41
Domain	SM00320	WD40	SMART	3.896e-05	0.1717	0.007155	0.06416	32	268	CHAF1B,WDR18,WDR54,RACK1,IFT80,DTL,NBEA,TBL3,WDR47,WDR19,WDR12,WDR4,WDR43,WDR3,NBEAL2,BOP1,WDR5,RRP9,LRBA,CDC20,CORO1C,NLE1,WDR77,GEMIN5,SEC31B,THOC6,TBC1D31,PAK1IP1,WDR34,WRAP53,GNB4,WDR41
Domain	IPR001680	WD40_repeat	InterPro	5.207e-05	0.2295	0.008363	0.075	32	272	CHAF1B,WDR18,WDR54,RACK1,IFT80,DTL,NBEA,TBL3,WDR47,WDR19,WDR12,WDR4,WDR43,WDR3,NBEAL2,BOP1,WDR5,RRP9,LRBA,CDC20,CORO1C,NLE1,WDR77,GEMIN5,SEC31B,THOC6,TBC1D31,PAK1IP1,WDR34,WRAP53,GNB4,WDR41
Domain	IPR022383	Lactate/malate_DH_C	InterPro	5.503e-05	0.2425	0.008363	0.075	5	9	MDH1,MDH2,MDH1B,LDHA,LDHB
Domain	IPR015955	Lactate_DH/Glyco_Ohase_4_C	InterPro	5.503e-05	0.2425	0.008363	0.075	5	9	MDH1,MDH2,MDH1B,LDHA,LDHB
Domain	3.90.110.10	-	Gene3D	5.503e-05	0.2425	0.008363	0.075	5	9	MDH1,MDH2,MDH1B,LDHA,LDHB
Domain	PF02866	Ldh_1_C	Pfam	5.503e-05	0.2425	0.008363	0.075	5	9	MDH1,MDH2,MDH1B,LDHA,LDHB
Domain	3.30.1330.20	-	Gene3D	6.594e-05	0.2906	0.009676	0.08678	7	20	TUBA1B,TUBB4B,TUBB,TUBA1C,TUBB2A,TUBB2B,EHHADH
Domain	IPR000357	HEAT	InterPro	6.806e-05	0.3	0.009676	0.08678	12	58	MTOR,STK36,TOGARAM1,NCAPG,NCAPD3,XPO1,SPAG6,PRKDC,NCAPG2,HEATR3,IPO5,HEATR1
Domain	IPR016024	ARM-type_fold	InterPro	7.574e-05	0.3338	0.01043	0.09355	37	340	HGH1,USP9X,TRRAP,MYBBP1A,ARFGEF1,NBEA,PELP1,MTOR,STK36,SAAL1,TOGARAM1,NCDN,NCAPG,PSME4,NBEAL2,RRP12,NCAPD3,DAAM2,LRBA,PIK3CD,ARMC6,XPO1,SPAG6,PRKDC,STKLD1,NCAPG2,ITPR1,NOP9,URB1,TELO2,TTC12,HEATR3,KPNA2,KPNA3,IPO5,HEATR1,HUWE1
Domain	1.10.287.600	-	Gene3D	9.418e-05	0.415	0.01258	0.1128	7	21	TUBA1B,TUBB4B,TUBB,TUBA1C,TUBB2A,TUBB2B,EHHADH
Domain	1.25.10.10	-	Gene3D	0.0001118	0.4926	0.01431	0.1283	27	222	HGH1,USP9X,TRRAP,ARFGEF1,MTOR,STK36,SAAL1,TOGARAM1,NCAPG,PSME4,RRP12,NCAPD3,DAAM2,LRBA,ARMC6,XPO1,SPAG6,PRKDC,NCAPG2,NOP9,TELO2,TTC12,HEATR3,KPNA2,KPNA3,IPO5,HEATR1
Domain	IPR019775	WD40_repeat_CS	InterPro	0.0001136	0.5009	0.01431	0.1283	22	164	CHAF1B,WDR18,RACK1,DTL,TBL3,WDR47,WDR12,WDR3,BOP1,WDR5,RRP9,CDC20,CORO1C,NLE1,WDR77,GEMIN5,SEC31B,THOC6,TBC1D31,PAK1IP1,GNB4,WDR41
Domain	PF03953	Tubulin_C	Pfam	0.0001315	0.5796	0.01454	0.1304	7	22	TUBA1B,TUBB4B,TUBB,TUBA1C,TUBB2A,TUBB2B,EHHADH
Domain	SM00865	Tubulin_C	SMART	0.0001315	0.5796	0.01454	0.1304	7	22	TUBA1B,TUBB4B,TUBB,TUBA1C,TUBB2A,TUBB2B,EHHADH
Domain	3.40.50.1440	-	Gene3D	0.0001315	0.5796	0.01454	0.1304	7	22	TUBA1B,TUBB4B,TUBB,TUBA1C,TUBB2A,TUBB2B,EHHADH
Domain	IPR018316	Tubulin/FtsZ_2-layer-sand-dom	InterPro	0.0001315	0.5796	0.01454	0.1304	7	22	TUBA1B,TUBB4B,TUBB,TUBA1C,TUBB2A,TUBB2B,EHHADH
Domain	3.40.50.300	-	Gene3D	0.000132	0.5817	0.01454	0.1304	66	747	RAB19,MTG1,ERCC2,BRIP1,ATAD5,SMC1A,MCM2,MCM3,MCM5,MCM6,MCM7,RRAGB,KATNAL1,ZRANB3,EHD2,RAD54L,TTF2,ABCC1,MSH2,CMSS1,SMC2,FANCM,ARF5,ARL2,RUVBL1,MTHFD1,MYO1F,SMARCA2,CARD11,ATRX,MCM8,MDN1,DDX18,GTPBP3,ARHGAP35,GSPT1,RABL2B,TJP1,CDC6,HELLS,TRIP13,GSPT2,RECQL4,RAD54B,ABCC2,RAB26,IFT22,ERCC6L,EIF4A3,BMS1,DHX33,DHX9,DNA2,GNL3,RAD51,KRAS,RAN,RAP1A,DYNC2H1,DTYMK,SMC6,RFC4,RFC5,ATAD3B,DYNC1LI1,DDX39A
Domain	IPR000217	Tubulin	InterPro	0.00018	0.7934	0.01725	0.1547	7	23	TUBA1B,TUBB4B,TUBB,TUBA1C,TUBB2A,TUBB2B,EHHADH
Domain	SM00864	Tubulin	SMART	0.00018	0.7934	0.01725	0.1547	7	23	TUBA1B,TUBB4B,TUBB,TUBA1C,TUBB2A,TUBB2B,EHHADH
Domain	IPR008280	Tub_FtsZ_C	InterPro	0.00018	0.7934	0.01725	0.1547	7	23	TUBA1B,TUBB4B,TUBB,TUBA1C,TUBB2A,TUBB2B,EHHADH
Domain	PS00227	TUBULIN	PROSITE	0.00018	0.7934	0.01725	0.1547	7	23	TUBA1B,TUBB4B,TUBB,TUBA1C,TUBB2A,TUBB2B,EHHADH
Domain	IPR017975	Tubulin_CS	InterPro	0.00018	0.7934	0.01725	0.1547	7	23	TUBA1B,TUBB4B,TUBB,TUBA1C,TUBB2A,TUBB2B,EHHADH
Domain	IPR023123	Tubulin_C	InterPro	0.00018	0.7934	0.01725	0.1547	7	23	TUBA1B,TUBB4B,TUBB,TUBA1C,TUBB2A,TUBB2B,EHHADH
Domain	PF00091	Tubulin	Pfam	0.000242	1	0.02222	0.1993	7	24	TUBA1B,TUBB4B,TUBB,TUBA1C,TUBB2A,TUBB2B,EHHADH
Domain	IPR003008	Tubulin_FtsZ_GTPase	InterPro	0.000242	1	0.02222	0.1993	7	24	TUBA1B,TUBB4B,TUBB,TUBA1C,TUBB2A,TUBB2B,EHHADH
Domain	IPR000330	SNF2_N	InterPro	0.0002832	1	0.02465	0.221	8	32	ZRANB3,RAD54L,TTF2,SMARCA2,ATRX,HELLS,RAD54B,ERCC6L
Domain	PF00176	SNF2_N	Pfam	0.0002832	1	0.02465	0.221	8	32	ZRANB3,RAD54L,TTF2,SMARCA2,ATRX,HELLS,RAD54B,ERCC6L
Domain	PF00633	HHH	Pfam	0.0002908	1	0.02465	0.221	4	7	ERCC1,NTHL1,OGG1,RAD51
Domain	IPR000445	HhH_motif	InterPro	0.0002908	1	0.02465	0.221	4	7	ERCC1,NTHL1,OGG1,RAD51
Domain	SM00487	DEXDc	SMART	0.000339	1	0.02812	0.2522	16	109	BRIP1,ZRANB3,RAD54L,TTF2,FANCM,SMARCA2,ATRX,DDX18,HELLS,RECQL4,RAD54B,ERCC6L,EIF4A3,DHX33,DHX9,DDX39A
Domain	3.40.50.150	-	Gene3D	0.0003446	1	0.02812	0.2522	17	120	FBL,METTL26,EEF1AKMT2,SRM,DIMT1,INMT,CARNMT1,PRMT2,PRMT1,PRMT7,METTL2A,PNMT,NSUN2,TRDMT1,DNMT3B,NSUN7,TFB1M
Domain	IPR014001	Helicase_ATP-bd	InterPro	0.0003767	1	0.03018	0.2707	16	110	BRIP1,ZRANB3,RAD54L,TTF2,FANCM,SMARCA2,ATRX,DDX18,HELLS,RECQL4,RAD54B,ERCC6L,EIF4A3,DHX33,DHX9,DDX39A
Domain	IPR029063	SAM-dependent_MTases	InterPro	0.0004197	1	0.0316	0.2834	17	122	FBL,METTL26,EEF1AKMT2,SRM,DIMT1,INMT,CARNMT1,PRMT2,PRMT1,PRMT7,METTL2A,PNMT,NSUN2,TRDMT1,DNMT3B,NSUN7,TFB1M
Domain	SM00651	Sm	SMART	0.000423	1	0.0316	0.2834	6	19	NAA38,SNRPB,SNRPD1,SNRPF,LSM6,LSM5
Domain	PF01423	LSM	Pfam	0.000423	1	0.0316	0.2834	6	19	NAA38,SNRPB,SNRPD1,SNRPF,LSM6,LSM5
Domain	IPR001163	LSM_dom_euk/arc	InterPro	0.000423	1	0.0316	0.2834	6	19	NAA38,SNRPB,SNRPD1,SNRPF,LSM6,LSM5
Domain	IPR027640	Kinesin-like_fam	InterPro	0.0004997	1	0.0367	0.3292	9	43	KIF18A,KIF2C,KIF23,KIF4A,KIF15,KIF11,KIFC1,KIF22,KIF20A
Domain	IPR001236	Lactate/malate_DH_N	InterPro	0.000556	1	0.03762	0.3374	4	8	MDH1,MDH2,LDHA,LDHB
Domain	PF00056	Ldh_1_N	Pfam	0.000556	1	0.03762	0.3374	4	8	MDH1,MDH2,LDHA,LDHB
Domain	IPR001557	L-lactate/malate_DH	InterPro	0.000556	1	0.03762	0.3374	4	8	MDH1,MDH2,LDHA,LDHB
Domain	PF00505	HMG_box	Pfam	0.0005937	1	0.03762	0.3374	10	53	SOX4,SOX9,SOX15,SOX12,SSRP1,TCF7,TFAM,HMGB1,HMGB2,PMS1
Domain	3.40.850.10	-	Gene3D	0.0005976	1	0.03762	0.3374	9	44	KIF18A,KIF2C,KIF23,KIF4A,KIF15,KIF11,KIFC1,KIF22,KIF20A
Domain	PF00225	Kinesin	Pfam	0.0005976	1	0.03762	0.3374	9	44	KIF18A,KIF2C,KIF23,KIF4A,KIF15,KIF11,KIFC1,KIF22,KIF20A
Domain	SM00129	KISc	SMART	0.0005976	1	0.03762	0.3374	9	44	KIF18A,KIF2C,KIF23,KIF4A,KIF15,KIF11,KIFC1,KIF22,KIF20A
Domain	PS50067	KINESIN_MOTOR_2	PROSITE	0.0005976	1	0.03762	0.3374	9	44	KIF18A,KIF2C,KIF23,KIF4A,KIF15,KIF11,KIFC1,KIF22,KIF20A
Domain	PS00411	KINESIN_MOTOR_1	PROSITE	0.0005976	1	0.03762	0.3374	9	44	KIF18A,KIF2C,KIF23,KIF4A,KIF15,KIF11,KIFC1,KIF22,KIF20A
Domain	IPR001752	Kinesin_motor_dom	InterPro	0.0005976	1	0.03762	0.3374	9	44	KIF18A,KIF2C,KIF23,KIF4A,KIF15,KIF11,KIFC1,KIF22,KIF20A
Domain	SM00398	HMG	SMART	0.0006929	1	0.04241	0.3803	10	54	SOX4,SOX9,SOX15,SOX12,SSRP1,TCF7,TFAM,HMGB1,HMGB2,PMS1
Domain	PS50118	HMG_BOX_2	PROSITE	0.0006929	1	0.04241	0.3803	10	54	SOX4,SOX9,SOX15,SOX12,SSRP1,TCF7,TFAM,HMGB1,HMGB2,PMS1
Domain	1.10.30.10	-	Gene3D	0.0008053	1	0.04862	0.436	10	55	SOX4,SOX9,SOX15,SOX12,SSRP1,TCF7,TFAM,HMGB1,HMGB2,PMS1
Domain	SM00490	HELICc	SMART	0.000841	1	0.04942	0.4432	15	107	ZRANB3,RAD54L,TTF2,FANCM,SMARCA2,ATRX,DDX18,HELLS,RECQL4,RAD54B,ERCC6L,EIF4A3,DHX33,DHX9,DDX39A
Domain	PF00271	Helicase_C	Pfam	0.000841	1	0.04942	0.4432	15	107	ZRANB3,RAD54L,TTF2,FANCM,SMARCA2,ATRX,DDX18,HELLS,RECQL4,RAD54B,ERCC6L,EIF4A3,DHX33,DHX9,DDX39A
Pathway	1269741	Cell Cycle	BioSystems: REACTOME	2.837e-46	6.563e-43	6.563e-43	5.463e-42	141	624	KIF18A,BRIP1,MIS18BP1,CENPW,H2AZ2,NUP85,SMC1A,HJURP,SPC25,MCM2,MCM3,MCM5,MCM6,MCM7,MCM10,CDC45,CENPP,RMI1,TUBB4B,NDC80,FEN1,AKT2,FOXM1,MRE11,GTSE1,TUBB,GINS4,BIRC5,SMC2,NUP35,NDC1,RUVBL1,HAUS1,CENPI,TPX2,CEP70,GINS2,CEP152,CLSPN,CDCA5,PLK4,MYC,CENPJ,CENPN,MCM8,CENPK,NUP205,AURKA,NCAPG,PSME4,BRCA1,DBF4,BUB1,BUB1B,YWHAQ,KIF2C,NCAPD3,MIS18A,UBE2C,ODF2,NCAPH,CCNA2,ZWINT,ORC2,B9D2,CCNB2,CEP250,EXO1,H2…
Pathway	1269763	Cell Cycle, Mitotic	BioSystems: REACTOME	6.774e-42	1.567e-38	7.835e-39	6.521e-38	122	517	KIF18A,H2AZ2,NUP85,SMC1A,SPC25,MCM2,MCM3,MCM5,MCM6,MCM7,MCM10,CDC45,CENPP,TUBB4B,NDC80,FEN1,AKT2,FOXM1,GTSE1,TUBB,GINS4,BIRC5,SMC2,NUP35,NDC1,HAUS1,CENPI,TPX2,CEP70,GINS2,CEP152,CDCA5,PLK4,MYC,CENPJ,CENPN,MCM8,CENPK,NUP205,AURKA,NCAPG,PSME4,DBF4,BUB1,BUB1B,KIF2C,NCAPD3,UBE2C,ODF2,NCAPH,CCNA2,ZWINT,ORC2,B9D2,CCNB2,CEP250,H2AX,H2AZ1,TMPO,CDK1,CDC6,CDC20,CDC25A,SKA1,TOP2A,PCNA,DCTN3,AURKB,CDKN2C,PTT…
Pathway	1269820	Mitotic Prometaphase	BioSystems: REACTOME	1.941e-21	4.488e-18	1.496e-18	1.245e-17	40	111	KIF18A,NUP85,SMC1A,SPC25,CENPP,NDC80,BIRC5,SMC2,CENPI,CDCA5,CENPN,CENPK,NCAPG,BUB1,BUB1B,KIF2C,NCAPH,ZWINT,B9D2,CCNB2,CDK1,CDC20,SKA1,AURKB,CENPF,CENPM,PLK1,XPO1,PPP1CC,CENPH,KNTC1,INCENP,NDE1,ERCC6L,NUF2,SGO2,ZWILCH,CENPU,CDCA8,MAD2L1
Pathway	1269821	Resolution of Sister Chromatid Cohesion	BioSystems: REACTOME	7.22e-20	1.67e-16	4.175e-17	3.475e-16	37	103	KIF18A,NUP85,SMC1A,SPC25,CENPP,NDC80,BIRC5,CENPI,CDCA5,CENPN,CENPK,BUB1,BUB1B,KIF2C,ZWINT,B9D2,CCNB2,CDK1,CDC20,SKA1,AURKB,CENPF,CENPM,PLK1,XPO1,PPP1CC,CENPH,KNTC1,INCENP,NDE1,ERCC6L,NUF2,SGO2,ZWILCH,CENPU,CDCA8,MAD2L1
Pathway	1269784	DNA strand elongation	BioSystems: REACTOME	1.091e-18	2.524e-15	5.048e-16	4.202e-15	21	32	MCM2,MCM3,MCM5,MCM6,MCM7,CDC45,FEN1,GINS4,GINS2,MCM8,PCNA,POLA2,POLD1,PRIM1,PRIM2,GINS1,DNA2,RFC4,RFC5,LIG1,RPA3
Pathway	1269823	Mitotic Metaphase and Anaphase	BioSystems: REACTOME	3.597e-18	8.319e-15	1.354e-15	1.127e-14	47	182	KIF18A,NUP85,SMC1A,SPC25,CENPP,NDC80,BIRC5,CENPI,CDCA5,CENPN,CENPK,PSME4,BUB1,BUB1B,KIF2C,UBE2C,ZWINT,B9D2,TMPO,CDC20,SKA1,AURKB,PTTG1,CENPF,CENPM,PLK1,ANAPC4,VRK1,XPO1,PPP1CC,CENPH,ESPL1,KNTC1,INCENP,NDE1,ERCC6L,PSMA2,PSMD3,NUF2,FBXO5,SGO2,ZWILCH,CENPU,CDCA8,LMNB1,EMD,MAD2L1
Pathway	1269810	M Phase	BioSystems: REACTOME	4.099e-18	9.48e-15	1.354e-15	1.127e-14	63	311	KIF18A,H2AZ2,NUP85,SMC1A,SPC25,CENPP,NDC80,BIRC5,SMC2,NUP35,NDC1,CENPI,CDCA5,CENPN,CENPK,NUP205,NCAPG,PSME4,BUB1,BUB1B,KIF2C,NCAPD3,UBE2C,NCAPH,ZWINT,B9D2,CCNB2,H2AX,H2AZ1,TMPO,CDK1,CDC20,SKA1,AURKB,PTTG1,CENPF,CENPM,PLK1,ANAPC4,VRK1,KIF23,XPO1,PPP1CC,LPIN3,CENPH,ESPL1,KNTC1,INCENP,NDE1,ERCC6L,PSMA2,PSMD3,NUF2,NCAPG2,FBXO5,SGO2,ZWILCH,CENPU,CDCA8,KIF20A,LMNB1,EMD,MAD2L1
Pathway	1269825	Mitotic Anaphase	BioSystems: REACTOME	1.638e-17	3.788e-14	4.735e-15	3.941e-14	46	181	KIF18A,NUP85,SMC1A,SPC25,CENPP,NDC80,BIRC5,CENPI,CDCA5,CENPN,CENPK,PSME4,BUB1,BUB1B,KIF2C,UBE2C,ZWINT,B9D2,TMPO,CDC20,SKA1,AURKB,PTTG1,CENPF,CENPM,PLK1,ANAPC4,VRK1,XPO1,PPP1CC,CENPH,ESPL1,KNTC1,INCENP,NDE1,ERCC6L,PSMA2,PSMD3,NUF2,SGO2,ZWILCH,CENPU,CDCA8,LMNB1,EMD,MAD2L1
Pathway	1269875	DNA Replication	BioSystems: REACTOME	6.358e-16	1.471e-12	1.634e-13	1.36e-12	34	111	MCM2,MCM3,MCM5,MCM6,MCM7,MCM10,CDC45,FEN1,GINS4,GINS2,MCM8,PSME4,DBF4,CCNA2,ORC2,CDC6,PCNA,ORC6,POLA2,POLD1,POLE2,PRIM1,PRIM2,PSMA2,PSMD3,GINS1,CDT1,DNA2,E2F1,RFC4,RFC5,GMNN,LIG1,RPA3
Pathway	1269826	Separation of Sister Chromatids	BioSystems: REACTOME	1.275e-15	2.948e-12	2.948e-13	2.454e-12	42	170	KIF18A,NUP85,SMC1A,SPC25,CENPP,NDC80,BIRC5,CENPI,CDCA5,CENPN,CENPK,PSME4,BUB1,BUB1B,KIF2C,UBE2C,ZWINT,B9D2,CDC20,SKA1,AURKB,PTTG1,CENPF,CENPM,PLK1,ANAPC4,XPO1,PPP1CC,CENPH,ESPL1,KNTC1,INCENP,NDE1,ERCC6L,PSMA2,PSMD3,NUF2,SGO2,ZWILCH,CENPU,CDCA8,MAD2L1
Pathway	1269519	RHO GTPases Activate Formins	BioSystems: REACTOME	3.735e-15	8.638e-12	7.853e-13	6.537e-12	34	117	KIF18A,NUP85,SPC25,CENPP,NDC80,BIRC5,CENPI,CENPN,CENPK,BUB1,BUB1B,KIF2C,ZWINT,B9D2,CDC20,SKA1,AURKB,CENPF,PFN1,CENPM,PLK1,XPO1,PPP1CC,CENPH,KNTC1,INCENP,NDE1,ERCC6L,NUF2,SGO2,ZWILCH,CENPU,CDCA8,MAD2L1
Pathway	1269777	S Phase	BioSystems: REACTOME	5.184e-15	1.199e-11	9.993e-13	8.318e-12	36	132	SMC1A,MCM2,MCM3,MCM5,MCM6,MCM7,CDC45,FEN1,GINS4,GINS2,CDCA5,MYC,MCM8,PSME4,CCNA2,ORC2,CDC6,CDC25A,PCNA,ORC6,POLA2,CKS1B,POLD1,POLE2,PRIM1,PRIM2,PSMA2,PSMD3,GINS1,CDT1,DNA2,RFC4,RFC5,ESCO2,LIG1,RPA3
Pathway	83039	DNA replication	BioSystems: KEGG	1.518e-14	3.512e-11	2.702e-12	2.249e-11	19	36	MCM2,MCM3,MCM5,MCM6,MCM7,FEN1,RNASEH2A,SSBP1,PCNA,POLA2,POLD1,POLE2,PRIM1,PRIM2,DNA2,RFC4,RFC5,LIG1,RPA3
Pathway	1269773	Activation of the pre-replicative complex	BioSystems: REACTOME	1.692e-14	3.913e-11	2.795e-12	2.326e-11	18	32	MCM2,MCM3,MCM5,MCM6,MCM7,MCM10,CDC45,MCM8,DBF4,ORC2,CDC6,ORC6,POLA2,POLE2,PRIM1,PRIM2,CDT1,RPA3
Pathway	1269779	Synthesis of DNA	BioSystems: REACTOME	1.484e-13	3.433e-10	2.237e-11	1.862e-10	30	103	MCM2,MCM3,MCM5,MCM6,MCM7,CDC45,FEN1,GINS4,GINS2,MCM8,PSME4,CCNA2,ORC2,CDC6,PCNA,ORC6,POLA2,POLD1,POLE2,PRIM1,PRIM2,PSMA2,PSMD3,GINS1,CDT1,DNA2,RFC4,RFC5,LIG1,RPA3
Pathway	83054	Cell cycle	BioSystems: KEGG	1.547e-13	3.579e-10	2.237e-11	1.862e-10	33	124	SMC1A,MCM2,MCM3,MCM5,MCM6,MCM7,CDC45,MYC,DBF4,BUB1,BUB1B,YWHAQ,CCNA2,ORC2,CCNB2,CDK1,CDC6,CDC20,CDC25A,PCNA,CDKN2C,PTTG1,ORC6,CHEK1,TTK,PLK1,ANAPC4,YWHAH,PRKDC,ESPL1,E2F1,E2F5,MAD2L1
Pathway	1269757	Activation of ATR in response to replication stress	BioSystems: REACTOME	4.771e-13	1.104e-09	6.491e-11	5.403e-10	18	37	MCM2,MCM3,MCM5,MCM6,MCM7,MCM10,CDC45,CLSPN,MCM8,DBF4,ORC2,CDC6,CDC25A,ORC6,CHEK1,RFC4,RFC5,RPA3
Pathway	1269853	Chromosome Maintenance	BioSystems: REACTOME	9.952e-13	2.302e-09	1.259e-10	1.048e-09	30	110	MIS18BP1,CENPW,H2AZ2,HJURP,CENPP,FEN1,RUVBL1,CENPI,CENPN,CENPK,MIS18A,H2AX,H2AZ1,PCNA,OIP5,POLA2,CENPM,POLD1,POLE2,CENPH,PRIM1,PRIM2,ACD,DNA2,CENPU,WRAP53,RFC4,RFC5,LIG1,RPA3
Pathway	1268838	Organelle biogenesis and maintenance	BioSystems: REACTOME	1.034e-12	2.392e-09	1.259e-10	1.048e-09	57	341	MRPL23,IFT43,TTC26,TUBB4B,MRPS17,CC2D2A,IFT80,IFT74,IFT81,TUBB,MRPL13,MRPL28,GADD45GIP1,WDR19,HAUS1,CCT5,CEP70,CEP152,PLK4,CLUAP1,CENPJ,PPRC1,SSBP1,RPGRIP1L,ODF2,TFAM,B9D2,CEP250,CYCS,CDK1,DCTN3,EXOC4,TMEM67,PKD1,PLK1,IFT22,ATF2,MRPS26,MRPS9,MRPL36,MRPL11,MRPL1,CCP110,HAUS6,NDE1,SFI1,DCTN1,MRPL16,TCTN1,HDAC6,WDR34,IFT57,DYNC2H1,MRPL4,IFT52,TFB1M,BBS7
Pathway	1268846	Cilium Assembly	BioSystems: REACTOME	1.059e-11	2.45e-08	1.225e-09	1.02e-08	39	192	IFT43,TTC26,TUBB4B,CC2D2A,IFT80,IFT74,IFT81,TUBB,WDR19,HAUS1,CCT5,CEP70,CEP152,PLK4,CLUAP1,CENPJ,RPGRIP1L,ODF2,B9D2,CEP250,CDK1,DCTN3,EXOC4,TMEM67,PKD1,PLK1,IFT22,CCP110,HAUS6,NDE1,SFI1,DCTN1,TCTN1,HDAC6,WDR34,IFT57,DYNC2H1,IFT52,BBS7
Pathway	1269768	G1/S Transition	BioSystems: REACTOME	1.429e-11	3.305e-08	1.574e-09	1.31e-08	30	121	MCM2,MCM3,MCM5,MCM6,MCM7,MCM10,CDC45,AKT2,MYC,MCM8,DBF4,CCNA2,ORC2,CDK1,CDC6,CDC25A,PCNA,ORC6,POLA2,CKS1B,POLE2,PRIM1,PRIM2,PSMA2,PSMD3,FBXO5,DHFR,CDT1,E2F1,RPA3
Pathway	1269764	Mitotic G1-G1/S phases	BioSystems: REACTOME	1.697e-11	3.925e-08	1.784e-09	1.485e-08	33	145	MCM2,MCM3,MCM5,MCM6,MCM7,MCM10,CDC45,AKT2,MYC,MCM8,DBF4,CCNA2,ORC2,CDK1,CDC6,CDC25A,TOP2A,PCNA,CDKN2C,ORC6,POLA2,CKS1B,POLE2,PRIM1,PRIM2,PSMA2,PSMD3,FBXO5,DHFR,CDT1,E2F1,E2F5,RPA3
Pathway	1269742	Cell Cycle Checkpoints	BioSystems: REACTOME	1.837e-11	4.249e-08	1.847e-09	1.538e-08	40	204	BRIP1,MCM2,MCM3,MCM5,MCM6,MCM7,MCM10,CDC45,RMI1,MRE11,GTSE1,CLSPN,MCM8,PSME4,BRCA1,DBF4,BUB1B,YWHAQ,UBE2C,CCNA2,ORC2,CCNB2,EXO1,H2AX,CDK1,CDC6,CDC20,CDC25A,ORC6,CHEK1,ANAPC4,RMI2,YWHAH,PSMA2,PSMD3,DNA2,RFC4,RFC5,RPA3,MAD2L1
Pathway	1269785	Unwinding of DNA	BioSystems: REACTOME	3.286e-11	7.601e-08	3.167e-09	2.636e-08	10	12	MCM2,MCM3,MCM5,MCM6,MCM7,CDC45,GINS4,GINS2,MCM8,GINS1
Pathway	1269649	Gene Expression	BioSystems: REACTOME	1.215e-10	2.81e-07	1.124e-08	9.357e-08	174	1844	ERCC2,RPL34,BRIP1,RPL36A,H2AZ2,NUP85,FBL,RPS2,USP9X,MRM1,RPS7,RPS10,WDR18,RRAGB,RPL39L,FANCD2,RMI1,MTA3,ZNF724,EMG1,POLR1B,AKT2,RPL22L1,MRE11,MYBBP1A,XRN2,ZNF680,SRSF1,SRSF7,BIRC5,MSH2,OSGEP,TBL3,NUP35,KHSRP,SRRT,ZNF430,NDC1,PELP1,TSR1,MTOR,ZNF92,TET1,ZFP1,TPX2,PUS1,WDR12,EIF3B,FUS,SNRPA,SNRPB,SNRPD1,SNRPF,MYC,CENPJ,WDR4,GARS1,HNRNPM,NARS1,SSB,NDUFA4,SSRP1,SAP30,WDR43,NUP205,WDR3,ZNF599,AURKA,TXN…
Pathway	1269774	E2F mediated regulation of DNA replication	BioSystems: REACTOME	2.506e-10	5.797e-07	2.23e-08	1.856e-07	15	34	CDC45,MCM8,ORC2,CDK1,CDC6,CDC25A,PCNA,ORC6,POLA2,PRIM1,PRIM2,FBXO5,DHFR,CDT1,E2F1
Pathway	1269753	G2/M Checkpoints	BioSystems: REACTOME	4.884e-10	1.13e-06	4.184e-08	3.483e-07	34	172	BRIP1,MCM2,MCM3,MCM5,MCM6,MCM7,MCM10,CDC45,RMI1,MRE11,GTSE1,CLSPN,MCM8,PSME4,BRCA1,DBF4,YWHAQ,ORC2,CCNB2,EXO1,H2AX,CDK1,CDC6,CDC25A,ORC6,CHEK1,RMI2,YWHAH,PSMA2,PSMD3,DNA2,RFC4,RFC5,RPA3
Pathway	1269507	Signaling by Rho GTPases	BioSystems: REACTOME	5.569e-10	1.288e-06	4.6e-08	3.829e-07	60	430	KIF18A,ABR,H2AZ2,NUP85,SPC25,RTKN,FAM13B,CENPP,DLC1,MYL9,NDC80,SRGAP1,FGD1,FLNA,BIRC5,ARHGAP4,CENPI,CENPN,MYO9A,CENPK,BUB1,BUB1B,YWHAQ,KIF2C,ARHGAP35,CIT,ZWINT,B9D2,H2AX,H2AZ1,CDC20,SKA1,ARHGAP19,AURKB,CENPF,PFN1,CHN2,TRIP10,CENPM,PLK1,IQGAP3,XPO1,YWHAH,PPP1CC,RHPN2,ARHGEF10,CENPH,KNTC1,INCENP,NDE1,ERCC6L,NUF2,ARHGAP11A,SGO2,ZWILCH,CENPU,ECT2,CDCA8,ABI2,MAD2L1
Pathway	1269857	Extension of Telomeres	BioSystems: REACTOME	6.843e-10	1.583e-06	5.458e-08	4.543e-07	14	31	FEN1,RUVBL1,PCNA,POLA2,POLD1,POLE2,PRIM1,PRIM2,DNA2,WRAP53,RFC4,RFC5,LIG1,RPA3
Pathway	1269831	M/G1 Transition	BioSystems: REACTOME	1.134e-09	2.624e-06	8.464e-08	7.045e-07	23	88	MCM2,MCM3,MCM5,MCM6,MCM7,MCM10,CDC45,MCM8,PSME4,DBF4,ORC2,CDC6,ORC6,POLA2,POLE2,PRIM1,PRIM2,PSMA2,PSMD3,CDT1,E2F1,GMNN,RPA3
Pathway	1269832	DNA Replication Pre-Initiation	BioSystems: REACTOME	1.134e-09	2.624e-06	8.464e-08	7.045e-07	23	88	MCM2,MCM3,MCM5,MCM6,MCM7,MCM10,CDC45,MCM8,PSME4,DBF4,ORC2,CDC6,ORC6,POLA2,POLE2,PRIM1,PRIM2,PSMA2,PSMD3,CDT1,E2F1,GMNN,RPA3
Pathway	1269509	RHO GTPase Effectors	BioSystems: REACTOME	1.792e-09	4.145e-06	1.295e-07	1.078e-06	46	295	KIF18A,H2AZ2,NUP85,SPC25,RTKN,CENPP,MYL9,NDC80,FLNA,BIRC5,CENPI,CENPN,CENPK,BUB1,BUB1B,YWHAQ,KIF2C,CIT,ZWINT,B9D2,H2AX,H2AZ1,CDC20,SKA1,AURKB,CENPF,PFN1,CENPM,PLK1,IQGAP3,XPO1,YWHAH,PPP1CC,RHPN2,CENPH,KNTC1,INCENP,NDE1,ERCC6L,NUF2,SGO2,ZWILCH,CENPU,CDCA8,ABI2,MAD2L1
Pathway	138080	Aurora B signaling	BioSystems: Pathway Interaction Database	2.561e-09	5.923e-06	1.795e-07	1.494e-06	15	39	NDC80,BIRC5,SMC2,AURKA,NCAPG,BUB1,KIF2C,NCAPH,AURKB,KIF23,PPP1CC,INCENP,NSUN2,CDCA8,KIF20A
Pathway	1269859	Telomere C-strand (Lagging Strand) Synthesis	BioSystems: REACTOME	2.682e-09	6.203e-06	1.825e-07	1.519e-06	12	24	FEN1,PCNA,POLA2,POLD1,POLE2,PRIM1,PRIM2,DNA2,RFC4,RFC5,LIG1,RPA3
Pathway	1269788	Lagging Strand Synthesis	BioSystems: REACTOME	3.347e-09	7.743e-06	2.212e-07	1.841e-06	11	20	FEN1,PCNA,POLA2,POLD1,PRIM1,PRIM2,DNA2,RFC4,RFC5,LIG1,RPA3
Pathway	1383018	AURKA Activation by TPX2	BioSystems: REACTOME	9.484e-09	2.194e-05	6.093e-07	5.072e-06	20	75	TUBB4B,TUBB,HAUS1,TPX2,CEP70,CEP152,PLK4,CENPJ,AURKA,ODF2,CEP250,CDK1,DCTN3,HMMR,PLK1,CCP110,HAUS6,NDE1,SFI1,DCTN1
Pathway	138007	PLK1 signaling events	BioSystems: Pathway Interaction Database	1.767e-08	4.086e-05	1.104e-06	9.193e-06	15	44	NDC80,TPX2,CLSPN,AURKA,BUB1,BUB1B,CDK1,CDC20,PLK1,INCENP,ERCC6L,FBXO5,CENPU,ECT2,KIF20A
Pathway	1269789	Processive synthesis on the lagging strand	BioSystems: REACTOME	3.389e-08	7.839e-05	2.063e-06	1.717e-05	9	15	FEN1,PCNA,POLA2,POLD1,PRIM1,PRIM2,DNA2,LIG1,RPA3
Pathway	1270350	DNA Repair	BioSystems: REACTOME	6.163e-08	0.0001426	3.655e-06	3.042e-05	45	319	ERCC1,ERCC2,BRIP1,ACTL6A,FANCD2,FANCB,RMI1,FANCG,FEN1,CUL4A,MRE11,DTL,APBB1,APEX1,MSH2,FANCM,RAD51AP1,RUVBL1,UBE2T,CLSPN,BRCA1,NTHL1,OGG1,CCNA2,EXO1,H2AX,SPIDR,PCNA,HMGN1,CHEK1,POLD1,POLE2,RMI2,POLR2L,XRCC5,PRKDC,EME1,USP7,DNA2,KPNA2,RAD51,RFC4,RFC5,LIG1,RPA3
Pathway	1309102	HDR through Homologous Recombination (HRR)	BioSystems: REACTOME	7.56e-08	0.0001749	4.372e-06	3.639e-05	18	69	BRIP1,RMI1,MRE11,RAD51AP1,BRCA1,EXO1,SPIDR,PCNA,CHEK1,POLD1,POLE2,RMI2,EME1,DNA2,RAD51,RFC4,RFC5,RPA3
Pathway	1268847	Anchoring of the basal body to the plasma membrane	BioSystems: REACTOME	7.86e-08	0.0001818	4.434e-06	3.691e-05	22	100	TUBB4B,CC2D2A,TUBB,HAUS1,CEP70,CEP152,PLK4,CENPJ,RPGRIP1L,ODF2,B9D2,CEP250,CDK1,DCTN3,TMEM67,PLK1,CCP110,HAUS6,NDE1,SFI1,DCTN1,TCTN1
Pathway	1269797	Mitotic G2-G2/M phases	BioSystems: REACTOME	1.81e-07	0.0004185	9.965e-06	8.295e-05	31	186	TUBB4B,FOXM1,GTSE1,TUBB,HAUS1,TPX2,CEP70,CEP152,PLK4,CENPJ,AURKA,PSME4,ODF2,CCNA2,CCNB2,CEP250,CDK1,CDC25A,DCTN3,CENPF,HMMR,PLK1,XPO1,CCP110,HAUS6,NDE1,PSMA2,PSMD3,SFI1,DCTN1,E2F1
Pathway	M6682	CDK Regulation of DNA Replication	MSigDB C2 BIOCARTA (v6.0)	2.796e-07	0.0006466	1.47e-05	0.0001223	9	18	MCM2,MCM3,MCM5,MCM6,MCM7,ORC2,CDC6,ORC6,CDT1
Pathway	1269772	G1/S-Specific Transcription	BioSystems: REACTOME	2.796e-07	0.0006466	1.47e-05	0.0001223	9	18	CDC45,CDK1,CDC6,CDC25A,PCNA,FBXO5,DHFR,CDT1,E2F1
Pathway	1269790	Removal of the Flap Intermediate	BioSystems: REACTOME	3.446e-07	0.0007971	1.771e-05	0.0001474	8	14	FEN1,PCNA,POLA2,POLD1,PRIM1,PRIM2,DNA2,RPA3
Pathway	1269799	G2/M Transition	BioSystems: REACTOME	4.653e-07	0.001076	2.34e-05	0.0001948	30	184	TUBB4B,FOXM1,GTSE1,TUBB,HAUS1,TPX2,CEP70,CEP152,PLK4,CENPJ,AURKA,PSME4,ODF2,CCNA2,CCNB2,CEP250,CDK1,CDC25A,DCTN3,CENPF,HMMR,PLK1,XPO1,CCP110,HAUS6,NDE1,PSMA2,PSMD3,SFI1,DCTN1
Pathway	1309103	Homologous DNA Pairing and Strand Exchange	BioSystems: REACTOME	7.788e-07	0.001801	3.833e-05	0.000319	13	43	BRIP1,RMI1,MRE11,RAD51AP1,BRCA1,EXO1,CHEK1,RMI2,DNA2,RAD51,RFC4,RFC5,RPA3
Pathway	1269808	Loss of proteins required for interphase microtubule organization from the centrosome	BioSystems: REACTOME	8.162e-07	0.001888	3.853e-05	0.0003207	17	72	TUBB4B,TUBB,HAUS1,CEP70,CEP152,PLK4,CENPJ,ODF2,CEP250,CDK1,DCTN3,PLK1,CCP110,HAUS6,NDE1,SFI1,DCTN1
Pathway	1269809	Loss of Nlp from mitotic centrosomes	BioSystems: REACTOME	8.162e-07	0.001888	3.853e-05	0.0003207	17	72	TUBB4B,TUBB,HAUS1,CEP70,CEP152,PLK4,CENPJ,ODF2,CEP250,CDK1,DCTN3,PLK1,CCP110,HAUS6,NDE1,SFI1,DCTN1
Pathway	137934	E2F transcription factor network	BioSystems: Pathway Interaction Database	1.006e-06	0.002326	4.607e-05	0.0003835	17	73	MCM3,TRRAP,SMARCA2,MYC,BRCA1,CCNA2,TK1,CDK1,CDC6,CDC25A,CDKN2C,PLAU,DHFR,RANBP1,E2F1,E2F5,TRIM28
Pathway	169351	Validated targets of C-MYC transcriptional activation	BioSystems: Pathway Interaction Database	1.016e-06	0.00235	4.607e-05	0.0003835	18	81	ACTL6A,TRRAP,SHMT1,BIRC5,RUVBL1,MYC,GAPDH,BCAT1,DDX18,NME2,CAD,ODC1,TK1,CDC25A,PTMA,HUWE1,LDHA,ENO1
Pathway	1269803	Regulation of PLK1 Activity at G2/M Transition	BioSystems: REACTOME	1.178e-06	0.002724	5.239e-05	0.0004361	19	90	TUBB4B,TUBB,HAUS1,CEP70,CEP152,PLK4,CENPJ,AURKA,ODF2,CCNB2,CEP250,CDK1,DCTN3,PLK1,CCP110,HAUS6,NDE1,SFI1,DCTN1
Pathway	PW:0000662	mismatch repair pathway	Pathway Ontology	1.224e-06	0.002832	5.279e-05	0.0004394	10	26	MSH2,EXO1,PCNA,HMGB1,PMS1,POLD1,RFC4,RFC5,LIG1,RPA3
Pathway	1309108	HDR through Single Strand Annealing (SSA)	BioSystems: REACTOME	1.233e-06	0.002851	5.279e-05	0.0004394	12	38	ERCC1,BRIP1,RMI1,MRE11,BRCA1,EXO1,RMI2,DNA2,RAD51,RFC4,RFC5,RPA3
Pathway	104488	Cysteine and methionine metabolism	BioSystems: KEGG	1.39e-06	0.003216	5.847e-05	0.0004867	13	45	MAT1A,MDH1,MDH2,SRM,BCAT1,MAT2B,CBS,TST,CBSL,CTH,DNMT3B,LDHA,LDHB
Pathway	1270366	PCNA-Dependent Long Patch Base Excision Repair	BioSystems: REACTOME	1.435e-06	0.00332	5.929e-05	0.0004935	9	21	FEN1,APEX1,PCNA,POLD1,POLE2,RFC4,RFC5,LIG1,RPA3
Pathway	1269856	Telomere Maintenance	BioSystems: REACTOME	1.484e-06	0.003433	6.023e-05	0.0005013	18	83	H2AZ2,FEN1,RUVBL1,H2AX,H2AZ1,PCNA,POLA2,POLD1,POLE2,PRIM1,PRIM2,ACD,DNA2,WRAP53,RFC4,RFC5,LIG1,RPA3
Pathway	1309104	Presynaptic phase of homologous DNA pairing and strand exchange	BioSystems: REACTOME	2.276e-06	0.005265	9.077e-05	0.0007556	12	40	BRIP1,RMI1,MRE11,BRCA1,EXO1,CHEK1,RMI2,DNA2,RAD51,RFC4,RFC5,RPA3
Pathway	1309095	DNA Double-Strand Break Repair	BioSystems: REACTOME	2.595e-06	0.006002	0.0001017	0.0008468	27	169	ERCC1,BRIP1,RMI1,FEN1,MRE11,APBB1,RAD51AP1,CLSPN,BRCA1,CCNA2,EXO1,H2AX,SPIDR,PCNA,CHEK1,POLD1,POLE2,RMI2,XRCC5,PRKDC,EME1,DNA2,KPNA2,RAD51,RFC4,RFC5,RPA3
Pathway	377262	Fanconi anemia pathway	BioSystems: KEGG	2.925e-06	0.006765	0.0001127	0.0009385	14	55	ERCC1,BRIP1,FANCD2,FANCB,RMI1,FANCG,FANCM,UBE2T,BRCA1,RMI2,EME1,TELO2,RAD51,RPA3
Pathway	1268853	Intraflagellar transport	BioSystems: REACTOME	3.045e-06	0.007042	0.0001154	0.0009609	12	41	IFT43,TTC26,IFT80,IFT74,IFT81,WDR19,CLUAP1,IFT22,WDR34,IFT57,DYNC2H1,IFT52
Pathway	1269794	Regulation of DNA replication	BioSystems: REACTOME	3.241e-06	0.007497	0.0001209	0.001007	17	79	MCM2,MCM3,MCM5,MCM6,MCM7,MCM10,MCM8,PSME4,CCNA2,ORC2,CDC6,ORC6,PSMA2,PSMD3,CDT1,E2F1,GMNN
Pathway	83045	Mismatch repair	BioSystems: KEGG	3.58e-06	0.00828	0.0001311	0.001092	9	23	MSH2,SSBP1,EXO1,PCNA,POLD1,RFC4,RFC5,LIG1,RPA3
Pathway	1309106	Resolution of D-loop Structures through Holliday Junction Intermediates	BioSystems: REACTOME	3.628e-06	0.008393	0.0001311	0.001092	11	35	BRIP1,RMI1,MRE11,RAD51AP1,BRCA1,EXO1,SPIDR,RMI2,EME1,DNA2,RAD51
Pathway	1383085	rRNA processing	BioSystems: REACTOME	3.828e-06	0.008855	0.0001362	0.001134	30	203	RPL34,RPL36A,FBL,RPS2,MRM1,RPS7,RPS10,WDR18,RPL39L,EMG1,RPL22L1,XRN2,TBL3,PELP1,TSR1,WDR12,WDR43,WDR3,DIMT1,BOP1,RRP9,HSD17B10,EXOSC8,BMS1,RPSA,HEATR1,TFB1M,RPL7,RPL8,RPL17
Pathway	1269854	Nucleosome assembly	BioSystems: REACTOME	4.881e-06	0.01129	0.0001682	0.0014	16	73	MIS18BP1,CENPW,H2AZ2,HJURP,CENPP,RUVBL1,CENPI,CENPN,CENPK,MIS18A,H2AX,H2AZ1,OIP5,CENPM,CENPH,CENPU
Pathway	1269855	Deposition of new CENPA-containing nucleosomes at the centromere	BioSystems: REACTOME	4.881e-06	0.01129	0.0001682	0.0014	16	73	MIS18BP1,CENPW,H2AZ2,HJURP,CENPP,RUVBL1,CENPI,CENPN,CENPK,MIS18A,H2AX,H2AZ1,OIP5,CENPM,CENPH,CENPU
Pathway	1309105	Resolution of D-Loop Structures	BioSystems: REACTOME	4.945e-06	0.01144	0.0001682	0.0014	11	36	BRIP1,RMI1,MRE11,RAD51AP1,BRCA1,EXO1,SPIDR,RMI2,EME1,DNA2,RAD51
Pathway	1270364	Resolution of AP sites via the multiple-nucleotide patch replacement pathway	BioSystems: REACTOME	5.425e-06	0.01255	0.0001808	0.001505	9	24	FEN1,APEX1,PCNA,POLD1,POLE2,RFC4,RFC5,LIG1,RPA3
Pathway	1269806	Recruitment of mitotic centrosome proteins and complexes	BioSystems: REACTOME	5.55e-06	0.01284	0.0001808	0.001505	17	82	TUBB4B,TUBB,HAUS1,CEP70,CEP152,PLK4,CENPJ,ODF2,CEP250,CDK1,DCTN3,PLK1,CCP110,HAUS6,NDE1,SFI1,DCTN1
Pathway	1269805	Centrosome maturation	BioSystems: REACTOME	5.55e-06	0.01284	0.0001808	0.001505	17	82	TUBB4B,TUBB,HAUS1,CEP70,CEP152,PLK4,CENPJ,ODF2,CEP250,CDK1,DCTN3,PLK1,CCP110,HAUS6,NDE1,SFI1,DCTN1
Pathway	1269787	Polymerase switching	BioSystems: REACTOME	6.329e-06	0.01464	0.0001978	0.001647	7	14	PCNA,POLA2,POLD1,PRIM1,PRIM2,RFC4,RFC5
Pathway	1269861	Polymerase switching on the C-strand of the telomere	BioSystems: REACTOME	6.329e-06	0.01464	0.0001978	0.001647	7	14	PCNA,POLA2,POLD1,PRIM1,PRIM2,RFC4,RFC5
Pathway	1269786	Leading Strand Synthesis	BioSystems: REACTOME	6.329e-06	0.01464	0.0001978	0.001647	7	14	PCNA,POLA2,POLD1,PRIM1,PRIM2,RFC4,RFC5
Pathway	SMP00128	Gluconeogenesis	SMPDB	6.628e-06	0.01533	0.0002001	0.001665	8	19	MDH1,MDH2,GAPDH,GPI,PC,PCK2,PGAM1,GALM
Pathway	1270359	Resolution of Abasic Sites (AP sites)	BioSystems: REACTOME	6.66e-06	0.0154	0.0002001	0.001665	11	37	FEN1,APEX1,NTHL1,OGG1,PCNA,POLD1,POLE2,RFC4,RFC5,LIG1,RPA3
Pathway	1270351	Base Excision Repair	BioSystems: REACTOME	6.66e-06	0.0154	0.0002001	0.001665	11	37	FEN1,APEX1,NTHL1,OGG1,PCNA,POLD1,POLE2,RFC4,RFC5,LIG1,RPA3
Pathway	790012	Biosynthesis of amino acids	BioSystems: KEGG	7.075e-06	0.01637	0.0002098	0.001746	16	75	MAT1A,SHMT1,ALDH7A1,GAPDH,BCAT1,MAT2B,CBS,PC,PGAM1,PKM,CBSL,CTH,PSPH,ALDH18A1,PYCR3,ENO1
Pathway	M17370	Role of Ran in mitotic spindle regulation	MSigDB C2 BIOCARTA (v6.0)	7.679e-06	0.01776	0.0002248	0.001871	6	10	TPX2,AURKA,KIF15,KPNA2,RAN,RANBP1
Pathway	1269796	Removal of licensing factors from origins	BioSystems: REACTOME	8.472e-06	0.0196	0.000245	0.002039	16	76	MCM2,MCM3,MCM5,MCM6,MCM7,MCM10,MCM8,PSME4,CCNA2,ORC2,CDC6,ORC6,PSMA2,PSMD3,CDT1,GMNN
Pathway	1309099	Homology Directed Repair	BioSystems: REACTOME	8.825e-06	0.02041	0.000252	0.002098	23	140	ERCC1,BRIP1,RMI1,FEN1,MRE11,RAD51AP1,CLSPN,BRCA1,CCNA2,EXO1,H2AX,SPIDR,PCNA,CHEK1,POLD1,POLE2,RMI2,EME1,DNA2,RAD51,RFC4,RFC5,RPA3
Pathway	1309100	HDR through Homologous Recombination (HR) or Single Strand Annealing (SSA)	BioSystems: REACTOME	1.392e-05	0.03219	0.0003925	0.003267	22	134	ERCC1,BRIP1,RMI1,MRE11,RAD51AP1,CLSPN,BRCA1,CCNA2,EXO1,H2AX,SPIDR,PCNA,CHEK1,POLD1,POLE2,RMI2,EME1,DNA2,RAD51,RFC4,RFC5,RPA3
Pathway	1270133	Metabolism of nucleotides	BioSystems: REACTOME	1.513e-05	0.035	0.0004217	0.00351	18	97	ADSL,APRT,PAICS,NUDT1,ATIC,LHPP,NME2,CAD,TK1,PFAS,TXN,HPRT1,DCTPP1,IMPDH2,ITPA,DTYMK,DUT,NUDT15
Pathway	1269833	Assembly of the pre-replicative complex	BioSystems: REACTOME	1.544e-05	0.0357	0.000425	0.003538	15	71	MCM2,MCM3,MCM5,MCM6,MCM7,MCM8,PSME4,ORC2,CDC6,ORC6,PSMA2,PSMD3,CDT1,E2F1,GMNN
Pathway	1269862	Processive synthesis on the C-strand of the telomere	BioSystems: REACTOME	1.604e-05	0.03709	0.0004364	0.003632	6	11	FEN1,PCNA,POLD1,DNA2,LIG1,RPA3
Pathway	1309107	Resolution of D-loop Structures through Synthesis-Dependent Strand Annealing (SDSA)	BioSystems: REACTOME	1.653e-05	0.03823	0.0004445	0.0037	9	27	BRIP1,RMI1,MRE11,RAD51AP1,BRCA1,EXO1,RMI2,DNA2,RAD51
Pathway	1269654	Transcriptional Regulation by TP53	BioSystems: REACTOME	2.758e-05	0.0638	0.0007308	0.006083	43	374	ERCC2,BRIP1,RRAGB,FANCD2,RMI1,AKT2,MRE11,BIRC5,MSH2,MTOR,TPX2,CENPJ,NDUFA4,SSRP1,AURKA,BRCA1,TNRC6A,YWHAQ,GPI,CASP6,CCNA2,CCNG1,CYCS,EXO1,CDK1,PCNA,AURKB,CHEK1,TXN,PRMT1,RMI2,COX6C,POLR2L,ATF2,YWHAH,USP7,DNA2,E2F1,RFC4,RFC5,LRPPRC,STEAP3,RPA3
Pathway	1383086	Major pathway of rRNA processing in the nucleolus and cytosol	BioSystems: REACTOME	2.78e-05	0.06431	0.0007308	0.006083	26	181	RPL34,RPL36A,FBL,RPS2,RPS7,RPS10,WDR18,RPL39L,EMG1,RPL22L1,XRN2,TBL3,PELP1,TSR1,WDR12,WDR43,WDR3,BOP1,RRP9,EXOSC8,BMS1,RPSA,HEATR1,RPL7,RPL8,RPL17
Pathway	1270135	Purine ribonucleoside monophosphate biosynthesis	BioSystems: REACTOME	3.045e-05	0.07043	0.0007914	0.006587	6	12	ADSL,PAICS,ATIC,LHPP,PFAS,IMPDH2
Pathway	1427846	rRNA processing in the nucleus and cytosol	BioSystems: REACTOME	3.169e-05	0.0733	0.0008144	0.006779	27	193	RPL34,RPL36A,FBL,RPS2,RPS7,RPS10,WDR18,RPL39L,EMG1,RPL22L1,XRN2,TBL3,PELP1,TSR1,WDR12,WDR43,WDR3,DIMT1,BOP1,RRP9,EXOSC8,BMS1,RPSA,HEATR1,RPL7,RPL8,RPL17
Pathway	1269815	Nuclear Envelope Breakdown	BioSystems: REACTOME	4.329e-05	0.1001	0.0011	0.009158	12	52	NUP85,NUP35,NDC1,NUP205,CCNB2,TMPO,CDK1,PLK1,VRK1,LPIN3,LMNB1,EMD
Pathway	M8560	Cell Cycle: G2/M Checkpoint	MSigDB C2 BIOCARTA (v6.0)	4.933e-05	0.1141	0.00124	0.01032	8	24	BRCA1,YWHAQ,CDK1,CDC25A,CHEK1,PLK1,YWHAH,PRKDC
Pathway	MAP00620_Pyruvate_metabolism	MAP00620 Pyruvate metabolism	GenMAPP	5.725e-05	0.1324	0.001424	0.01185	9	31	ACAT1,MDH1,MDH2,ADH5,GLO1,PC,PKM,LDHA,LDHB
Pathway	1339113	SUMOylation of DNA replication proteins	BioSystems: REACTOME	6.336e-05	0.1466	0.001559	0.01298	11	46	NUP85,BIRC5,NUP35,NDC1,NUP205,AURKA,TOP2A,PCNA,AURKB,INCENP,CDCA8
Pathway	1269765	G0 and Early G1	BioSystems: REACTOME	6.876e-05	0.159	0.001674	0.01394	8	25	CCNA2,CDK1,CDC6,CDC25A,TOP2A,PCNA,E2F1,E2F5
Pathway	82998	Pyruvate metabolism	BioSystems: KEGG	7.201e-05	0.1666	0.001735	0.01444	10	39	ACAT1,MDH1,MDH2,ALDH7A1,GLO1,PC,PCK2,PKM,LDHA,LDHB
Pathway	1269688	Processing of Capped Intron-Containing Pre-mRNA	BioSystems: REACTOME	7.772e-05	0.1798	0.001848	0.01538	31	248	NUP85,SRSF1,SRSF7,NUP35,SRRT,NDC1,FUS,SNRPA,SNRPB,SNRPD1,SNRPF,HNRNPM,NUP205,TXNL4A,RBMX,CSTF2T,YBX1,LSM6,HNRNPA1,LSM5,HNRNPA2B1,POLR2L,THOC6,SF3B5,EIF4A3,DHX9,SLBP,SNRNP25,HNRNPA3,ALYREF,DDX39A
Pathway	83044	Nucleotide excision repair	BioSystems: KEGG	7.831e-05	0.1811	0.001848	0.01538	11	47	ERCC1,ERCC2,CUL4A,PCNA,GTF2H2C,POLD1,POLE2,RFC4,RFC5,LIG1,RPA3
Pathway	83043	Base excision repair	BioSystems: KEGG	9.831e-05	0.2274	0.002297	0.01912	9	33	FEN1,APEX1,NTHL1,OGG1,PCNA,HMGB1,POLD1,POLE2,LIG1
Pathway	1269781	Switching of origins to a post-replicative state	BioSystems: REACTOME	0.0001062	0.2457	0.002433	0.02025	14	74	MCM2,MCM3,MCM5,MCM6,MCM7,MCM8,PSME4,CCNA2,ORC2,CDC6,ORC6,PSMA2,PSMD3,CDT1
Pathway	1269782	Orc1 removal from chromatin	BioSystems: REACTOME	0.0001062	0.2457	0.002433	0.02025	14	74	MCM2,MCM3,MCM5,MCM6,MCM7,MCM8,PSME4,CCNA2,ORC2,CDC6,ORC6,PSMA2,PSMD3,CDT1
Pathway	83046	Homologous recombination	BioSystems: KEGG	0.0001139	0.2634	0.00258	0.02147	10	41	BRIP1,RAD54L,MRE11,SSBP1,BRCA1,RAD54B,POLD1,EME1,RAD51,RPA3
Pathway	1383080	Regulation of TP53 Activity through Phosphorylation	BioSystems: REACTOME	0.0001149	0.2657	0.00258	0.02147	16	93	BRIP1,RMI1,MRE11,TPX2,SSRP1,AURKA,BRCA1,CCNA2,EXO1,AURKB,CHEK1,RMI2,DNA2,RFC4,RFC5,RPA3
Pathway	1269200	MHC class II antigen presentation	BioSystems: REACTOME	0.0001209	0.2796	0.002688	0.02238	17	103	KIF18A,KIF2C,DCTN3,HLA-DQB1,CTSC,HLA-DRB5,AP1S1,KIF23,CTSV,KIF4A,DCTN1,KIF15,KIF11,KIF22,AP1M2,KIF20A,DYNC1LI1
Pathway	1268743	SUMO E3 ligases SUMOylate target proteins	BioSystems: REACTOME	0.0001366	0.316	0.003009	0.02505	17	104	NUP85,SMC1A,BIRC5,NUP35,NDC1,SCMH1,NUP205,AURKA,BRCA1,NSMCE1,TOP2A,PCNA,AURKB,PCGF2,INCENP,SMC6,CDCA8
Pathway	1270413	Mismatch repair (MMR) directed by MSH2:MSH3 (MutSbeta)	BioSystems: REACTOME	0.0001412	0.3266	0.003052	0.0254	6	15	MSH2,EXO1,PCNA,POLD1,LIG1,RPA3
Pathway	1270412	Mismatch repair (MMR) directed by MSH2:MSH6 (MutSalpha)	BioSystems: REACTOME	0.0001412	0.3266	0.003052	0.0254	6	15	MSH2,EXO1,PCNA,POLD1,LIG1,RPA3
Pathway	82957	Arginine and proline metabolism	BioSystems: KEGG	0.0001425	0.3296	0.003052	0.0254	11	50	L3HYPDH,CNDP2,ALDH7A1,SRM,OAT,ODC1,CKB,SMOX,ALDH18A1,PYCR3,LAP3
Pathway	1269776	E2F-enabled inhibition of pre-replication complex formation	BioSystems: REACTOME	0.0001482	0.3428	0.003116	0.02594	5	10	MCM8,ORC2,CDK1,CDC25A,ORC6
Pathway	1269863	Removal of the Flap Intermediate from the C-strand	BioSystems: REACTOME	0.0001482	0.3428	0.003116	0.02594	5	10	FEN1,PCNA,POLD1,DNA2,RPA3
Pathway	1270158	Metabolism of amino acids and derivatives	BioSystems: REACTOME	0.0001683	0.3893	0.003508	0.0292	40	367	RPL34,RPL36A,ACAT1,RPS2,MAT1A,RPS7,RPS10,RPL39L,AFMID,RPL22L1,SHMT1,CNDP2,ALDH7A1,SRM,BCAT1,PSME4,GLDC,GLUD1,OAT,ODC1,CBS,INMT,HSD17B10,CARNMT1,TST,CKB,SMOX,PNMT,CBSL,CTH,PSMA2,PSMD3,DARS1,PSPH,ALDH18A1,PYCR3,RPSA,RPL7,RPL8,RPL17
Pathway	1269840	Phosphorylation of Emi1	BioSystems: REACTOME	0.0001731	0.4005	0.003544	0.0295	4	6	CDK1,CDC20,PLK1,FBXO5
Pathway	413392	Inosine monophosphate biosynthesis, PRPP + glutamine => IMP	BioSystems: KEGG	0.0001731	0.4005	0.003544	0.0295	4	6	ADSL,PAICS,ATIC,PFAS
Pathway	1269108	Influenza Infection	BioSystems: REACTOME	0.0001792	0.4145	0.003636	0.03026	22	158	RPL34,RPL36A,NUP85,RPS2,RPS7,RPS10,RPL39L,RPL22L1,NUP35,NDC1,NUP205,GRSF1,POLR2L,XPO1,KPNA2,KPNA3,IPO5,RAN,RPSA,RPL7,RPL8,RPL17
Pathway	1269800	Cyclin A/B1 associated events during G2/M transition	BioSystems: REACTOME	0.0002061	0.4768	0.004146	0.03451	7	22	FOXM1,CCNA2,CCNB2,CDK1,CDC25A,PLK1,XPO1
Pathway	1270411	Mismatch Repair	BioSystems: REACTOME	0.0002145	0.4962	0.004277	0.0356	6	16	MSH2,EXO1,PCNA,POLD1,LIG1,RPA3
Pathway	137959	BARD1 signaling events	BioSystems: Pathway Interaction Database	0.0002204	0.5098	0.004357	0.03627	8	29	FANCD2,FANCG,MRE11,BRCA1,PCNA,XRCC5,PRKDC,RAD51
Pathway	413414	Cysteine biosynthesis, homocysteine + serine => cysteine	BioSystems: KEGG	0.0002279	0.5271	0.00443	0.03687	3	3	CBS,CBSL,CTH
Pathway	1270182	Cysteine formation from homocysteine	BioSystems: REACTOME	0.0002279	0.5271	0.00443	0.03687	3	3	CBS,CBSL,CTH
Pathway	1269838	APC/C-mediated degradation of cell cycle proteins	BioSystems: REACTOME	0.0002358	0.5453	0.004507	0.03751	15	89	AURKA,PSME4,BUB1B,UBE2C,CCNA2,CDK1,CDC20,AURKB,PTTG1,PLK1,ANAPC4,PSMA2,PSMD3,FBXO5,MAD2L1
Pathway	1269837	Regulation of mitotic cell cycle	BioSystems: REACTOME	0.0002358	0.5453	0.004507	0.03751	15	89	AURKA,PSME4,BUB1B,UBE2C,CCNA2,CDK1,CDC20,AURKB,PTTG1,PLK1,ANAPC4,PSMA2,PSMD3,FBXO5,MAD2L1
Pathway	137935	FOXM1 transcription factor network	BioSystems: Pathway Interaction Database	0.0002556	0.5912	0.00478	0.03979	9	37	FOXM1,BIRC5,MYC,CCNB2,CDK1,AURKB,CENPF,CKS1B,PLK1
Pathway	413353	Methionine degradation	BioSystems: KEGG	0.0002583	0.5975	0.00478	0.03979	5	11	MAT1A,MAT2B,CBS,CBSL,DNMT3B
Pathway	1269835	CDC6 association with the ORC:origin complex	BioSystems: REACTOME	0.0002583	0.5975	0.00478	0.03979	5	11	MCM8,ORC2,CDC6,ORC6,E2F1
Pathway	1269822	Condensation of Prometaphase Chromosomes	BioSystems: REACTOME	0.0002583	0.5975	0.00478	0.03979	5	11	SMC2,NCAPG,NCAPH,CCNB2,CDK1
Pathway	1268738	SUMOylation	BioSystems: REACTOME	0.0002743	0.6344	0.005035	0.04191	17	110	NUP85,SMC1A,BIRC5,NUP35,NDC1,SCMH1,NUP205,AURKA,BRCA1,NSMCE1,TOP2A,PCNA,AURKB,PCGF2,INCENP,SMC6,CDCA8
Pathway	1268700	Post-chaperonin tubulin folding pathway	BioSystems: REACTOME	0.0002811	0.6502	0.00512	0.04262	7	23	TUBA1B,TUBB4B,ARL2,TUBA1C,TUBB2A,TBCB,TUBB2B
Pathway	1270368	Recognition of DNA damage by PCNA-containing replication complex	BioSystems: REACTOME	0.000285	0.6591	0.005149	0.04286	8	30	CUL4A,DTL,PCNA,POLD1,POLE2,RFC4,RFC5,RPA3
Pathway	373901	HTLV-I infection	BioSystems: KEGG	0.0003177	0.7348	0.005696	0.04741	30	256	TRRAP,FZD1,FZD4,AKT2,PIK3R3,MYC,BUB1B,CCNB2,CDC20,PCNA,CDKN2C,PTTG1,HLA-B,HLA-DQB1,HLA-DRB5,CHEK1,PIK3CD,ANAPC4,POLD1,POLE2,XPO1,ATF2,IL6,TLN2,KRAS,RAN,RANBP1,FZD3,E2F1,MAD2L1
Pathway	137925	Aurora A signaling	BioSystems: Pathway Interaction Database	0.0003642	0.8423	0.006479	0.05393	8	31	TACC3,BIRC5,TPX2,AURKA,BRCA1,AURKB,DLGAP5,RAN
Pathway	1309120	Gap-filling DNA repair synthesis and ligation in TC-NER	BioSystems: REACTOME	0.000413	0.9553	0.007292	0.0607	12	65	ERCC2,CUL4A,PCNA,HMGN1,POLD1,POLE2,POLR2L,USP7,RFC4,RFC5,LIG1,RPA3
Pathway	814926	Carbon metabolism	BioSystems: KEGG	0.0004223	0.9768	0.0074	0.0616	17	114	ACAT1,MDH1,MDH2,ADH5,SHMT1,GAPDH,SUCLG1,GLDC,GLUD1,GPI,PC,PCCB,PGAM1,PKM,PSPH,EHHADH,ENO1
Pathway	1269961	Gluconeogenesis	BioSystems: REACTOME	0.0004604	1	0.008007	0.06665	8	32	MDH1,MDH2,GAPDH,GPI,PC,PCK2,PGAM1,ENO1
Pathway	1269109	Influenza Life Cycle	BioSystems: REACTOME	0.0004719	1	0.008146	0.0678	20	147	RPL34,RPL36A,NUP85,RPS2,RPS7,RPS10,RPL39L,RPL22L1,NUP35,NDC1,NUP205,GRSF1,POLR2L,XPO1,IPO5,RAN,RPSA,RPL7,RPL8,RPL17
Pathway	1309119	Dual incision in TC-NER	BioSystems: REACTOME	0.0004778	1	0.008187	0.06814	12	66	ERCC1,ERCC2,CUL4A,PCNA,HMGN1,POLD1,POLE2,POLR2L,USP7,RFC4,RFC5,RPA3
Pathway	1309116	Gap-filling DNA repair synthesis and ligation in GG-NER	BioSystems: REACTOME	0.0004963	1	0.00844	0.07025	7	25	PCNA,POLD1,POLE2,RFC4,RFC5,LIG1,RPA3
Pathway	1269754	G2/M DNA damage checkpoint	BioSystems: REACTOME	0.0005475	1	0.009244	0.07695	15	96	BRIP1,RMI1,MRE11,BRCA1,YWHAQ,EXO1,H2AX,CDK1,CHEK1,RMI2,YWHAH,DNA2,RFC4,RFC5,RPA3
Pathway	1309115	Dual Incision in GG-NER	BioSystems: REACTOME	0.0005805	1	0.00973	0.08099	9	41	ERCC1,ERCC2,CUL4A,PCNA,POLD1,POLE2,RFC4,RFC5,RPA3
Pathway	1268697	Formation of tubulin folding intermediates by CCT/TriC	BioSystems: REACTOME	0.0006444	1	0.01072	0.08926	7	26	TUBA1B,TUBB4B,CCT7,CCT5,TUBA1C,TUBB2A,TUBB2B
Pathway	SMP00040	Glycolysis	SMPDB	0.0006507	1	0.01074	0.0894	5	13	GAPDH,GPI,PGAM1,PKM,GALM
Pathway	1269689	mRNA Splicing	BioSystems: REACTOME	0.0006547	1	0.01074	0.0894	24	196	SRSF1,SRSF7,SRRT,FUS,SNRPA,SNRPB,SNRPD1,SNRPF,HNRNPM,TXNL4A,RBMX,CSTF2T,YBX1,LSM6,HNRNPA1,LSM5,HNRNPA2B1,POLR2L,SF3B5,EIF4A3,DHX9,SNRNP25,HNRNPA3,ALYREF
Pathway	1383076	Regulation of TP53 Activity	BioSystems: REACTOME	0.0006623	1	0.01079	0.0898	21	162	BRIP1,RMI1,AKT2,MRE11,MTOR,TPX2,SSRP1,AURKA,BRCA1,CCNA2,CCNG1,EXO1,CDK1,AURKB,CHEK1,RMI2,USP7,DNA2,RFC4,RFC5,RPA3
Pathway	1270134	Purine metabolism	BioSystems: REACTOME	0.0007146	1	0.01148	0.09554	8	34	ADSL,APRT,PAICS,ATIC,LHPP,PFAS,HPRT1,IMPDH2
Pathway	1268695	Cooperation of Prefoldin and TriC/CCT in actin and tubulin folding	BioSystems: REACTOME	0.0007146	1	0.01148	0.09554	8	34	TUBA1B,TUBB4B,CCT7,CCT5,TUBA1C,PFDN4,TUBB2A,TUBB2B
Pathway	1269780	DNA replication initiation	BioSystems: REACTOME	0.0007332	1	0.01152	0.09585	4	8	POLA2,POLE2,PRIM1,PRIM2
Pathway	PW:0000133	selenoamino acid metabolic	Pathway Ontology	0.0007332	1	0.01152	0.09585	4	8	MAT1A,CBS,PRMT1,CTH
Pathway	1269860	Telomere C-strand synthesis initiation	BioSystems: REACTOME	0.0007332	1	0.01152	0.09585	4	8	POLA2,POLE2,PRIM1,PRIM2
Pathway	1309088	tRNA processing	BioSystems: REACTOME	0.0007368	1	0.01152	0.09585	16	109	NUP85,OSGEP,NUP35,NDC1,PUS1,WDR4,NUP205,POP1,GTPBP3,TSEN2,HSD17B10,TSEN34,PUS7,NSUN2,TRDMT1,RAN
Pathway	1309117	Transcription-Coupled Nucleotide Excision Repair (TC-NER)	BioSystems: REACTOME	0.0007639	1	0.01186	0.09871	13	79	ERCC1,ERCC2,CUL4A,PCNA,HMGN1,POLD1,POLE2,POLR2L,USP7,RFC4,RFC5,LIG1,RPA3
Pathway	PW:0000063	glyoxylate and dicarboxylate metabolic	Pathway Ontology	0.0008165	1	0.01251	0.1041	3	4	MDH1,MDH2,MTHFD1
Pathway	545271	cysteine biosynthesis	BioSystems: BIOCYC	0.0008165	1	0.01251	0.1041	3	4	MAT1A,MAT2B,CBS
Pathway	1269378	Kinesins	BioSystems: REACTOME	0.0008394	1	0.01277	0.1063	9	43	KIF18A,KIF2C,KIF23,KIF4A,KIF15,KIF11,KIFC1,KIF22,KIF20A
Pathway	1269690	mRNA Splicing - Major Pathway	BioSystems: REACTOME	0.0008512	1	0.01287	0.1071	23	188	SRSF1,SRSF7,SRRT,FUS,SNRPA,SNRPB,SNRPD1,SNRPF,HNRNPM,TXNL4A,RBMX,CSTF2T,YBX1,LSM6,HNRNPA1,LSM5,HNRNPA2B1,POLR2L,SF3B5,EIF4A3,DHX9,HNRNPA3,ALYREF
Pathway	83036	Ribosome	BioSystems: KEGG	0.0008608	1	0.01293	0.1076	20	154	MRPL23,RPL34,RPL36A,RPS2,RPS7,RPS10,MRPS17,RPL22L1,MRPL13,MRPL28,MRPS9,MRPL36,MRPL11,MRPL1,MRPL16,RPSA,MRPL4,RPL7,RPL8,RPL17
Pathway	1269059	Early Phase of HIV Life Cycle	BioSystems: REACTOME	0.0009626	1	0.01436	0.1196	5	14	FEN1,PSIP1,XRCC5,PPIA,LIG1
Pathway	1339149	Selenoamino acid metabolism	BioSystems: REACTOME	0.001024	1	0.01518	0.1263	17	123	RPL34,RPL36A,RPS2,MAT1A,RPS7,RPS10,RPL39L,RPL22L1,CBS,INMT,CBSL,CTH,DARS1,RPSA,RPL7,RPL8,RPL17
Pathway	1269691	mRNA Splicing - Minor Pathway	BioSystems: REACTOME	0.001033	1	0.01523	0.1267	10	53	SRSF1,SRSF7,SNRPB,SNRPD1,SNRPF,TXNL4A,YBX1,POLR2L,SF3B5,SNRNP25
Pathway	83002	Glyoxylate and dicarboxylate metabolism	BioSystems: KEGG	0.001045	1	0.01529	0.1273	7	28	ACAT1,MDH1,MDH2,AFMID,SHMT1,GLDC,PCCB
Pathway	M9703	Role of BRCA1, BRCA2 and ATR in Cancer Susceptibility	MSigDB C2 BIOCARTA (v6.0)	0.001123	1	0.01634	0.136	6	21	FANCD2,FANCG,MRE11,BRCA1,CHEK1,RAD51
Pathway	132956	Metabolic pathways	BioSystems: KEGG	0.001134	1	0.0164	0.1365	102	1272	PI4K2B,ACAT1,MAT1A,MDH1,MDH2,ADH5,AFMID,ADSL,POLR1B,POMK,MPI,SHMT1,APRT,PAICS,DEGS1,SEPHS1,MTHFD1,GALNT11,CNDP2,ATIC,ALDH7A1,B4GALT2,ATP5F1D,ATP5MC1,ATP5MC3,ATP5PO,GAPDH,LPCAT4,SRM,BCAT1,NDUFA4,NDUFA9,SUCLG1,COQ2,NDUFB3,NDUFS6,ST3GAL5,GLDC,GLUD1,A4GALT,NME2,UQCR11,GPI,CAD,MAT2B,OAT,ODC1,CBS,TK1,PAFAH1B3,CYCS,HSD17B10,HADH,PC,PCCB,PCK2,PIGM,CMBL,GATB,PFAS,CYP2S1,TST,POLA2,PGAM1,CKB,HPRT1,PKM,PLCG1…
Pathway	1383087	rRNA modification in the nucleus and cytosol	BioSystems: REACTOME	0.001156	1	0.0166	0.1382	11	63	FBL,RPS2,RPS7,EMG1,TBL3,WDR43,WDR3,DIMT1,RRP9,BMS1,HEATR1
Pathway	PW:0000049	cysteine metabolic	Pathway Ontology	0.001257	1	0.01784	0.1485	4	9	CBS,CTH,LDHA,LDHB
Pathway	1339150	Metabolism of ingested SeMet, Sec, MeSec into H2Se	BioSystems: REACTOME	0.001257	1	0.01784	0.1485	4	9	MAT1A,CBS,CBSL,CTH
Pathway	1268696	Prefoldin mediated transfer of substrate to CCT/TriC	BioSystems: REACTOME	0.001307	1	0.01843	0.1534	7	29	TUBB4B,CCT7,CCT5,TUBA1C,PFDN4,TUBB2A,TUBB2B
Pathway	1269819	Depolymerisation of the Nuclear Lamina	BioSystems: REACTOME	0.001373	1	0.01906	0.1586	5	15	TMPO,CDK1,LPIN3,LMNB1,EMD
Pathway	1269795	Association of licensing factors with the pre-replicative complex	BioSystems: REACTOME	0.001373	1	0.01906	0.1586	5	15	ORC2,CDC6,CDT1,E2F1,GMNN
Pathway	MAP00230_Purine_metabolism	MAP00230 Purine metabolism	GenMAPP	0.001376	1	0.01906	0.1586	13	84	ADSL,POLR1B,APRT,PAICS,ATIC,NME2,PDE4A,PFAS,HPRT1,PKM,POLD1,POLR2L,IMPDH2
Pathway	1269115	Influenza Viral RNA Transcription and Replication	BioSystems: REACTOME	0.001456	1	0.02005	0.1669	18	138	RPL34,RPL36A,NUP85,RPS2,RPS7,RPS10,RPL39L,RPL22L1,NUP35,NDC1,NUP205,GRSF1,POLR2L,IPO5,RPSA,RPL7,RPL8,RPL17
Pathway	PW:0000043	pyruvate metabolic	Pathway Ontology	0.001618	1	0.02214	0.1843	7	30	ACAT1,MDH1,MDH2,PC,PKM,LDHA,LDHB
Pathway	P00017	DNA replication	PantherDB	0.0019	1	0.02585	0.2152	5	16	XRN2,TOP2A,PCNA,POLD1,PRIM1
Pathway	82926	Glycolysis / Gluconeogenesis	BioSystems: KEGG	0.001941	1	0.0262	0.2181	11	67	ADH5,ALDH7A1,GAPDH,GPI,PCK2,PGAM1,PKM,GALM,LDHA,LDHB,ENO1
Pathway	1269802	Cyclin B2 mediated events	BioSystems: REACTOME	0.001948	1	0.0262	0.2181	3	5	CCNB2,CDK1,CDC25A
Pathway	M7239	Apoptotic DNA fragmentation and tissue homeostasis	MSigDB C2 BIOCARTA (v6.0)	0.001997	1	0.02655	0.221	4	10	TOP2A,HMGB1,HMGB2,DFFA
Pathway	M15109	Glycolysis Pathway	MSigDB C2 BIOCARTA (v6.0)	0.001997	1	0.02655	0.221	4	10	GAPDH,GPI,PGAM1,ENO1
Pathway	1269811	Mitotic Prophase	BioSystems: REACTOME	0.002016	1	0.02664	0.2218	18	142	H2AZ2,NUP85,SMC2,NUP35,NDC1,NUP205,NCAPD3,CCNB2,H2AX,H2AZ1,TMPO,CDK1,PLK1,VRK1,LPIN3,NCAPG2,LMNB1,EMD
Pathway	1309121	Fanconi Anemia Pathway	BioSystems: REACTOME	0.002203	1	0.02879	0.2396	8	40	ERCC1,FANCD2,FANCB,FANCG,FANCM,UBE2T,EME1,RPA3
Pathway	82949	Glycine, serine and threonine metabolism	BioSystems: KEGG	0.002203	1	0.02879	0.2396	8	40	SHMT1,ALDH7A1,GLDC,CBS,PGAM1,CBSL,CTH,PSPH
Pathway	1309101	Processing of DNA double-strand break ends	BioSystems: REACTOME	0.002219	1	0.02884	0.2401	14	99	BRIP1,RMI1,MRE11,CLSPN,BRCA1,CCNA2,EXO1,H2AX,CHEK1,RMI2,DNA2,RFC4,RFC5,RPA3
Pathway	1269842	Activation of APC/C and APC/C:Cdc20 mediated degradation of mitotic proteins	BioSystems: REACTOME	0.002441	1	0.03154	0.2626	12	79	PSME4,BUB1B,UBE2C,CCNA2,CDK1,CDC20,PTTG1,PLK1,ANAPC4,PSMA2,PSMD3,MAD2L1
Pathway	1269804	Polo-like kinase mediated events	BioSystems: REACTOME	0.002561	1	0.0329	0.2739	5	17	FOXM1,CCNB2,CDC25A,CENPF,PLK1
Pathway	125136	Spliceosome	BioSystems: KEGG	0.002629	1	0.03359	0.2796	17	134	SRSF1,SRSF7,SNRPA,SNRPB,SNRPD1,SNRPF,HNRNPM,TXNL4A,RBMX,LSM6,HNRNPA1,LSM5,SF3B5,EIF4A3,HNRNPA3,ALYREF,RP9
Pathway	1309111	Nucleotide Excision Repair	BioSystems: REACTOME	0.002708	1	0.03442	0.2865	15	112	ERCC1,ERCC2,ACTL6A,CUL4A,RUVBL1,PCNA,HMGN1,POLD1,POLE2,POLR2L,USP7,RFC4,RFC5,LIG1,RPA3
Pathway	126909	Oocyte meiosis	BioSystems: KEGG	0.002918	1	0.03688	0.3069	16	124	SMC1A,AURKA,BUB1,YWHAQ,CCNB2,CDK1,CDC20,PTTG1,PLK1,ANAPC4,YWHAH,PPP1CC,ESPL1,ITPR1,FBXO5,MAD2L1
Pathway	SMP00004	Glycine, Serine and Threonine Metabolism	SMPDB	0.002987	1	0.03739	0.3112	6	25	SHMT1,GARS1,GLDC,CBS,CTH,PSPH
Pathway	MAP00670_One_carbon_pool_by_folate	MAP00670 One carbon pool by folate	GenMAPP	0.002991	1	0.03739	0.3112	4	11	SHMT1,MTHFD1,ATIC,DHFR
Pathway	1269085	Rev-mediated nuclear export of HIV RNA	BioSystems: REACTOME	0.003471	1	0.04317	0.3593	7	34	NUP85,NUP35,NDC1,NUP205,XPO1,RAN,RANBP1
Pathway	P00030	Hypoxia response via HIF activation	PantherDB	0.00369	1	0.04536	0.3776	6	26	AKT2,PIK3R3,MTOR,TXN,PIK3CD,EGLN3
Pathway	1269839	Regulation of APC/C activators between G1/S and early anaphase	BioSystems: REACTOME	0.003713	1	0.04536	0.3776	12	83	PSME4,BUB1B,UBE2C,CCNA2,CDK1,CDC20,PLK1,ANAPC4,PSMA2,PSMD3,FBXO5,MAD2L1
Pathway	MAP00450_Selenoamino_acid_metabolism	MAP00450 Selenoamino acid metabolism	GenMAPP	0.003723	1	0.04536	0.3776	3	6	MAT1A,CBS,CTH
Pathway	PW:0000130	nucleotide excision repair	Pathway Ontology	0.003819	1	0.04536	0.3776	2	2	POLD1,LIG1
Pathway	PW:0000400	transulfuration of homocysteine metabolism	Pathway Ontology	0.003819	1	0.04536	0.3776	2	2	CBS,CTH
Pathway	142273	inosine-5'-phosphate biosynthesis	BioSystems: BIOCYC	0.003819	1	0.04536	0.3776	2	2	PAICS,ATIC
Pathway	142451	lactate fermentation (reoxidation of cytosolic NADH)	BioSystems: BIOCYC	0.003819	1	0.04536	0.3776	2	2	LDHA,LDHB
Pathway	1269824	Mitotic Metaphase/Anaphase Transition	BioSystems: REACTOME	0.003819	1	0.04536	0.3776	2	2	PLK1,FBXO5
Pathway	82946	Pyrimidine metabolism	BioSystems: KEGG	0.003853	1	0.04536	0.3776	14	105	POLR1B,NME2,CAD,TK1,POLA2,DCTPP1,POLR1A,POLD1,POLE2,POLR2L,PRIM1,PRIM2,DTYMK,DUT
Pathway	1269731	Metabolism of non-coding RNA	BioSystems: REACTOME	0.003867	1	0.04536	0.3776	9	53	NUP85,NUP35,NDC1,SNRPB,SNRPD1,SNRPF,NUP205,WDR77,GEMIN5
Pathway	1269732	snRNP Assembly	BioSystems: REACTOME	0.003867	1	0.04536	0.3776	9	53	NUP85,NUP35,NDC1,SNRPB,SNRPD1,SNRPF,NUP205,WDR77,GEMIN5
Pathway	1404797	Platinum drug resistance	BioSystems: KEGG	0.003883	1	0.04536	0.3776	11	73	ERCC1,AKT2,PIK3R3,BIRC5,MSH2,ATP7A,BRCA1,CYCS,TOP2A,PIK3CD,ABCC2
Pathway	82944	Purine metabolism	BioSystems: KEGG	0.004017	1	0.04669	0.3887	20	175	ADSL,POLR1B,APRT,PAICS,ATIC,NME2,PDE4A,PDE7A,PFAS,POLA2,HPRT1,PKM,POLR1A,POLD1,POLE2,POLR2L,PRIM1,PRIM2,IMPDH2,ITPA
Pathway	1269056	Infectious disease	BioSystems: REACTOME	0.004126	1	0.04771	0.3972	37	393	ERCC2,RPL34,RPL36A,NUP85,RPS2,RPS7,RPS10,RPL39L,FEN1,RPL22L1,NUP35,NDC1,SSRP1,NUP205,PSME4,VAMP1,GRSF1,PSIP1,AP1S1,POLR2L,XPO1,XRCC5,PPIA,PSMA2,PSMD3,KPNA2,KPNA3,IPO5,RAN,RANBP1,AP1M2,RPSA,LIG1,VPS28,RPL7,RPL8,RPL17
Pathway	199378	Ribosome biogenesis in eukaryotes	BioSystems: KEGG	0.004202	1	0.04835	0.4025	14	106	FBL,EMG1,XRN2,TBL3,WDR43,WDR3,MDN1,POP1,TCOF1,XPO1,BMS1,GNL3,RAN,HEATR1
Pathway	413341	Glycolysis, core module involving three-carbon compounds	BioSystems: KEGG	0.004275	1	0.04871	0.4055	4	12	GAPDH,PGAM1,PKM,ENO1
Pathway	1269755	Chk1/Chk2(Cds1) mediated inactivation of Cyclin B:Cdk1 complex	BioSystems: REACTOME	0.004275	1	0.04871	0.4055	4	12	YWHAQ,CDK1,CHEK1,YWHAH

## Sheet: ToppFun_cluster3
Category	ID	Name	Source	p-value	q-value Bonferroni	q-value FDR B&H	q-value FDR B&Y	Hit Count in Query List	Hit Count in Genome	Hit in Query List
GO: Molecular Function	GO:0008092	cytoskeletal protein binding		1.854e-07	0.0003202	0.0002197	0.001765	104	1061	GPHN,EPS8,KATNB1,SKA2,ACTN2,MAP3K1,CGN,BAIAP2,NCK2,FLNC,SORBS2,ANK1,PPP1R9A,ENC1,SYBU,SHTN1,CLSTN1,RAB6B,CDC42EP3,SLC8A1,ARL3,SIRT2,MARK4,ENAH,MAST1,TPPP3,DAAM1,FYN,SNTA1,CTNNAL1,NEK6,MYO1D,MYO5B,MYO7A,DISC1,SPTAN1,FCHO1,NEK2,COBL,PPP1R9B,NME1,MAPRE2,RAB29,WASF1,KLHL4,KIF13B,CALM1,GAS2L3,CALM2,HAP1,CAMK2D,CAPN2,SPAG9,PSTPIP2,PRC1,CDH24,TNNC1,AJUBA,TNNT3,CDH1,TNS1,FRMD5,PACSIN3,TMOD2,KIF24,KIF3B,S…
GO: Molecular Function	GO:0044325	ion channel binding		2.544e-07	0.0004394	0.0002197	0.001765	26	143	ACTN2,S100A10,TRAPPC2,ANK1,PPP1R9A,SLC8A1,ARRB1,FYN,SNTA1,GPD1L,PPP1R9B,NEDD4L,CALM1,CALM2,HAP1,CAMK2D,CAV1,AGRN,TRPC1,BAG2,ID2,CTNNB1,PRNP,TCAF1,RIMS3,GOPC
GO: Molecular Function	GO:0004672	protein kinase activity		5.298e-07	0.000915	0.000305	0.00245	121	1315	EPHB4,SPRED2,CRIM1,RPS6KA3,EZH2,ADCY9,MAP3K1,ACSL1,MET,STRADB,ADRA2B,KIDINS220,MAP3K9,MLLT1,FGFR4,NCK2,CDC42BPA,PPP1R9A,PRR5,APLP2,DGKD,STK32C,CHORDC1,ARRB1,ARRB2,MARK4,CD24,MAST1,INAVA,FYN,GAB1,TNIK,NEK6,GAS6,PBK,CCND1,NRP1,BLM,NPFFR2,MALT1,BMP7,NEK2,KAT2B,AFAP1L2,NRK,PPP1R9B,PDGFC,SFN,RPS6KA4,CALM1,CALM2,KALRN,CAMK2D,ROR2,DUSP14,SPAG9,RIPK4,CAV1,SIK3,NR2F2,PKMYT1,TIE1,CHEK2,PAK3,FZD10,CD74,AVPI…
GO: Molecular Function	GO:0016773	phosphotransferase activity, alcohol group as acceptor		1.062e-06	0.001834	0.0004584	0.003682	129	1444	EPHB4,SPRED2,CRIM1,RPS6KA3,EZH2,ADCY9,MAP3K1,ACSL1,ADK,MET,STRADB,ADRA2B,KIDINS220,MAP3K9,MLLT1,FGFR4,NCK2,CDC42BPA,PPP1R9A,PRR5,APLP2,DGKD,STK32C,CHORDC1,ARRB1,ARRB2,MARK4,CD24,MAST1,INAVA,FYN,GAB1,MVK,TNIK,NEK6,GAS6,PBK,CCND1,NRP1,BLM,NPFFR2,MALT1,BMP7,NEK2,KAT2B,AFAP1L2,NRK,PPP1R9B,PDGFC,SFN,RPS6KA4,CALM1,CALM2,KALRN,CAMK2D,ROR2,DUSP14,SPAG9,RIPK4,CAV1,SIK3,NR2F2,CCKBR,PKMYT1,TIE1,CHEK2,PAK3,F…
GO: Molecular Function	GO:0016301	kinase activity		1.423e-06	0.002458	0.0004917	0.003949	141	1621	EPHB4,SPRED2,CRIM1,RPS6KA3,AK9,EZH2,ADCY9,MAP3K1,ACSL1,ADK,MET,STRADB,ADRA2B,KIDINS220,MAP3K9,MLLT1,FGFR4,DHTKD1,NCK2,MPP1,CDC42BPA,PPP1R9A,PRR5,APLP2,DGKD,STK32C,CHORDC1,LMO4,TPK1,WDR91,ARRB1,ARRB2,MARK4,CD24,MAST1,INAVA,FYN,GAB1,MVK,TNIK,NEK6,GAS6,PBK,CCND1,NRP1,BLM,NPFFR2,MALT1,BMP7,NEK2,KAT2B,AFAP1L2,NRK,NUP210,PPP1R9B,NME1,PDGFC,SFN,RPS6KA4,CALM1,CALM2,KALRN,CAMK2D,ROR2,DUSP14,SPAG9,RIPK4,CA…
GO: Molecular Function	GO:0016462	pyrophosphatase activity		1.145e-05	0.01977	0.002636	0.02117	127	1485	ABCC4,ABCA4,NET1,KATNB1,EZH2,ARL6,S100A10,SYDE2,CGN,FHIT,CX3CL1,RASAL1,AGAP1,AGAP3,SETMAR,GARNL3,DCPS,ARHGAP23,ANXA1,PRR5,DEPDC1,MSH5,ATAD2,RAB6B,ABCC6,ARL3,ARRB1,ARRB2,RGS20,GRHL3,ATP2A3,FIGNL1,ATP6V1B2,MYO1D,MYO5B,MYO7A,ARHGAP26,BAG1,RGS9,RUVBL2,DNAH14,SNX13,NRP1,BLM,TBC1D12,GNA12,RAB40B,GNG10,MAPRE2,RAB29,KIF13B,KALRN,DOCK9,DYNLT1,TBC1D8,ATP6V0D1,ENTPD6,FZD10,TNNC1,AJUBA,TNNT3,AGRN,ITGB1BP1,OL…
GO: Molecular Function	GO:0016817	hydrolase activity, acting on acid anhydrides		1.221e-05	0.02109	0.002636	0.02117	127	1487	ABCC4,ABCA4,NET1,KATNB1,EZH2,ARL6,S100A10,SYDE2,CGN,FHIT,CX3CL1,RASAL1,AGAP1,AGAP3,SETMAR,GARNL3,DCPS,ARHGAP23,ANXA1,PRR5,DEPDC1,MSH5,ATAD2,RAB6B,ABCC6,ARL3,ARRB1,ARRB2,RGS20,GRHL3,ATP2A3,FIGNL1,ATP6V1B2,MYO1D,MYO5B,MYO7A,ARHGAP26,BAG1,RGS9,RUVBL2,DNAH14,SNX13,NRP1,BLM,TBC1D12,GNA12,RAB40B,GNG10,MAPRE2,RAB29,KIF13B,KALRN,DOCK9,DYNLT1,TBC1D8,ATP6V0D1,ENTPD6,FZD10,TNNC1,AJUBA,TNNT3,AGRN,ITGB1BP1,OL…
GO: Molecular Function	GO:0016818	hydrolase activity, acting on acid anhydrides, in phosphorus-containing anhydrides		1.221e-05	0.02109	0.002636	0.02117	127	1487	ABCC4,ABCA4,NET1,KATNB1,EZH2,ARL6,S100A10,SYDE2,CGN,FHIT,CX3CL1,RASAL1,AGAP1,AGAP3,SETMAR,GARNL3,DCPS,ARHGAP23,ANXA1,PRR5,DEPDC1,MSH5,ATAD2,RAB6B,ABCC6,ARL3,ARRB1,ARRB2,RGS20,GRHL3,ATP2A3,FIGNL1,ATP6V1B2,MYO1D,MYO5B,MYO7A,ARHGAP26,BAG1,RGS9,RUVBL2,DNAH14,SNX13,NRP1,BLM,TBC1D12,GNA12,RAB40B,GNG10,MAPRE2,RAB29,KIF13B,KALRN,DOCK9,DYNLT1,TBC1D8,ATP6V0D1,ENTPD6,FZD10,TNNC1,AJUBA,TNNT3,AGRN,ITGB1BP1,OL…
[truncated: 323 more rows]

## Sheet: ToppFun_cluster4
Category	ID	Name	Source	p-value	q-value Bonferroni	q-value FDR B&H	q-value FDR B&Y	Hit Count in Query List	Hit Count in Genome	Hit in Query List
[truncated: 579 more rows]

## Sheet: ToppFun_cluster 5
Category	ID	Name	Source	p-value	q-value Bonferroni	q-value FDR B&H	q-value FDR B&Y	Hit Count in Query List	Hit Count in Genome	Hit in Query List
[truncated: 611 more rows]

## Sheet: ToppFun_cluster6
Category	ID	Name	Source	p-value	q-value Bonferroni	q-value FDR B&H	q-value FDR B&Y	Hit Count in Query List	Hit Count in Genome	Hit in Query List
[truncated: 168 more rows]
