# Supplementary material for: Derivation of trophoblast stem cells from naïve human pluripotent stem cells
Source: eLife journal article supplement (doi:10.7554/elife.52504), 2020-02-12
Supplement: supp [file elife-52504-supp-v1.zip › elife_poa_e52504_Supplementary_file_4.xlsx]

## Sheet: GO terms nTSC over nPSC
Category	ID	Name	Source	p-value	q-value Bonferroni	q-value FDR B&H	q-value FDR B&Y	Hit Count in Query List	Hit Count in Genome	Hit in Query List
GO: Molecular Function	GO:0005102	signaling receptor binding		4.757e-05	0.009942	0.009266	0.05487	10	1817	LHB,S100A9,CGB7,DPP4,ITGA2,EGFR,ECM1,CLU,B2M,CGB3
GO: Molecular Function	GO:0001618	virus receptor activity		0.000133	0.0278	0.009266	0.05487	3	77	DPP4,ITGA2,EGFR
GO: Molecular Function	GO:0140272	exogenous protein binding		0.000133	0.0278	0.009266	0.05487	3	77	DPP4,ITGA2,EGFR
GO: Molecular Function	GO:0098772	molecular function regulator		0.0004199	0.08777	0.01977	0.1171	9	1905	LHB,SERPINB7,CGB7,ARHGDIB,CARD16,PRKCZ,FAM13A,EGFR,CGB3
GO: Molecular Function	GO:0004697	protein kinase C activity		0.0005167	0.108	0.01977	0.1171	2	26	PRKCZ,EGFR
GO: Molecular Function	GO:0005179	hormone activity		0.0005675	0.1186	0.01977	0.1171	3	126	LHB,CGB7,CGB3
GO: Molecular Function	GO:0043236	laminin binding		0.0008348	0.1745	0.02184	0.1293	2	33	ITGA2,ECM1
GO: Molecular Function	GO:0002020	protease binding		0.000836	0.1747	0.02184	0.1293	4	333	SERPINB7,DPP4,CARD16,ECM1
GO: Molecular Function	GO:0052731	phosphocholine phosphatase activity		0.001301	0.2719	0.02719	0.161	1	1	PHOSPHO1
GO: Molecular Function	GO:0052732	phosphoethanolamine phosphatase activity		0.001301	0.2719	0.02719	0.161	1	1	PHOSPHO1
GO: Biological Process	GO:0007565	female pregnancy		4.586e-10	7.187e-07	7.187e-07	5.702e-06	8	220	ARHGDIB,ITGA2,PSG2,PSG3,PSG4,PSG5,PSG6,PSG9
GO: Biological Process	GO:0044706	multi-multicellular organism process		1.938e-09	3.036e-06	1.518e-06	1.205e-05	8	264	ARHGDIB,ITGA2,PSG2,PSG3,PSG4,PSG5,PSG6,PSG9
GO: Biological Process	GO:0022414	reproductive process		8.326e-08	0.0001305	3.333e-05	0.0002644	13	1651	LHB,ETV5,CGB7,ARHGDIB,ITGA2,EGFR,PSG2,PSG3,PSG4,PSG5,PSG6,PSG9,CGB3
GO: Biological Process	GO:0000003	reproduction		8.507e-08	0.0001333	3.333e-05	0.0002644	13	1654	LHB,ETV5,CGB7,ARHGDIB,ITGA2,EGFR,PSG2,PSG3,PSG4,PSG5,PSG6,PSG9,CGB3
GO: Biological Process	GO:0044703	multi-organism reproductive process		1.808e-07	0.0002833	5.665e-05	0.0004495	11	1154	ETV5,CGB7,ARHGDIB,ITGA2,PSG2,PSG3,PSG4,PSG5,PSG6,PSG9,CGB3
GO: Biological Process	GO:0007267	cell-cell signaling		2.389e-05	0.03744	0.00624	0.04951	11	1899	TSPAN12,LHB,ETV5,S100A9,CGB7,DPP4,PRKCZ,ITGA2,EGFR,SIGLEC6,CGB3
GO: Biological Process	GO:0051092	positive regulation of NF-kappaB transcription factor activity		4.964e-05	0.07778	0.01111	0.08817	6	493	S100A9,CARD16,PRKCZ,EGFR,ECM1,CLU
GO: Biological Process	GO:0008284	positive regulation of cell population proliferation		8.751e-05	0.1371	0.016	0.1269	8	1096	SERPINB7,ETV5,DPP4,PRKCZ,ITGA2,EGFR,ECM1,CLU
GO: Biological Process	GO:0051336	regulation of hydrolase activity		9.187e-05	0.144	0.016	0.1269	9	1435	SERPINB7,S100A9,ARHGDIB,CARD16,PRKCZ,ITGA2,FAM13A,EGFR,ECM1
GO: Biological Process	GO:0006952	defense response		0.0001161	0.182	0.0182	0.1444	10	1850	S100A9,GBP2,DPP4,PRKCZ,ITGA2,EGFR,ECM1,CLU,PSG3,B2M
GO: Biological Process	GO:0051091	positive regulation of DNA-binding transcription factor activity		0.0001575	0.2468	0.02244	0.178	6	608	S100A9,CARD16,PRKCZ,EGFR,ECM1,CLU
GO: Biological Process	GO:0002709	regulation of T cell mediated immunity		0.0001978	0.31	0.02583	0.205	3	82	DPP4,PRKCZ,B2M
GO: Biological Process	GO:1990000	amyloid fibril formation		0.0002209	0.3461	0.02662	0.2112	2	16	CLU,B2M
GO: Biological Process	GO:0002726	positive regulation of T cell cytokine production		0.0003485	0.5461	0.03901	0.3095	2	20	PRKCZ,B2M
GO: Biological Process	GO:0032870	cellular response to hormone stimulus		0.0004635	0.7263	0.04842	0.3842	6	743	LHB,CGB7,PRKCZ,ITGA2,EGFR,CGB3
GO: Cellular Component	GO:0065010	extracellular membrane-bounded organelle		6.386e-05	0.01156	0.006557	0.03789	2	9	GBP2,PHOSPHO1
GO: Cellular Component	GO:0031983	vesicle lumen		7.246e-05	0.01311	0.006557	0.03789	5	328	S100A9,EGFR,ECM1,CLU,B2M
GO: Cellular Component	GO:0034774	secretory granule lumen		0.0008946	0.1619	0.04109	0.2374	4	322	S100A9,ECM1,CLU,B2M
GO: Cellular Component	GO:0060205	cytoplasmic vesicle lumen		0.0009366	0.1695	0.04109	0.2374	4	326	S100A9,ECM1,CLU,B2M
GO: Cellular Component	GO:0097489	multivesicular body, internal vesicle lumen		0.001362	0.2465	0.04109	0.2374	1	1	EGFR
GO: Cellular Component	GO:0099020	perinuclear endoplasmic reticulum lumen		0.001362	0.2465	0.04109	0.2374	1	1	CLU
GO: Cellular Component	GO:0005925	focal adhesion		0.002194	0.3971	0.04815	0.2782	4	411	DPP4,ITGA2,EGFR,B2M
GO: Cellular Component	GO:0005924	cell-substrate adherens junction		0.002293	0.415	0.04815	0.2782	4	416	DPP4,ITGA2,EGFR,B2M
GO: Cellular Component	GO:0030055	cell-substrate junction		0.002394	0.4333	0.04815	0.2782	4	421	DPP4,ITGA2,EGFR,B2M
GO: Cellular Component	GO:0070435	Shc-EGFR complex		0.002719	0.4921	0.04921	0.2844	1	2	EGFR
Domain	PF13895	Ig_2	Pfam	9.989e-10	1.838e-07	1.838e-07	1.065e-06	6	73	PSG2,PSG3,PSG4,PSG5,PSG6,PSG9
Domain	PF07686	V-set	Pfam	8.119e-09	1.494e-06	4.493e-07	2.603e-06	7	185	PSG2,PSG3,PSG4,PSG5,PSG6,PSG9,SIGLEC6
Domain	PF00047	ig	Pfam	9.767e-09	1.797e-06	4.493e-07	2.603e-06	7	190	PSG2,PSG3,PSG4,PSG5,PSG6,PSG9,SIGLEC6
Domain	IPR013151	Immunoglobulin	InterPro	9.767e-09	1.797e-06	4.493e-07	2.603e-06	7	190	PSG2,PSG3,PSG4,PSG5,PSG6,PSG9,SIGLEC6
Domain	IPR013106	Ig_V-set	InterPro	1.393e-08	2.563e-06	5.125e-07	2.97e-06	7	200	PSG2,PSG3,PSG4,PSG5,PSG6,PSG9,SIGLEC6
Domain	SM00408	IGc2	SMART	4.227e-08	7.778e-06	1.111e-06	6.439e-06	7	235	PSG2,PSG3,PSG4,PSG5,PSG6,PSG9,SIGLEC6
Domain	IPR003598	Ig_sub2	InterPro	4.227e-08	7.778e-06	1.111e-06	6.439e-06	7	235	PSG2,PSG3,PSG4,PSG5,PSG6,PSG9,SIGLEC6
Domain	IPR018245	Gonadotropin_bsu_CS	InterPro	5.961e-08	1.097e-05	1.371e-06	7.945e-06	3	6	LHB,CGB7,CGB3
Domain	PS00261	GLYCO_HORMONE_BETA_1	PROSITE	1.042e-07	1.918e-05	1.598e-06	9.26e-06	3	7	LHB,CGB7,CGB3
Domain	PS00689	GLYCO_HORMONE_BETA_2	PROSITE	1.042e-07	1.918e-05	1.598e-06	9.26e-06	3	7	LHB,CGB7,CGB3
Domain	SM00068	GHB	SMART	1.042e-07	1.918e-05	1.598e-06	9.26e-06	3	7	LHB,CGB7,CGB3
Domain	IPR001545	Gonadotropin_bsu	InterPro	1.042e-07	1.918e-05	1.598e-06	9.26e-06	3	7	LHB,CGB7,CGB3
Domain	PS50835	IG_LIKE	PROSITE	4.182e-07	7.695e-05	5.92e-06	3.43e-05	8	492	PSG2,PSG3,PSG4,PSG5,PSG6,PSG9,SIGLEC6,B2M
Domain	IPR007110	Ig-like_dom	InterPro	5.02e-07	9.237e-05	6.598e-06	3.823e-05	8	504	PSG2,PSG3,PSG4,PSG5,PSG6,PSG9,SIGLEC6,B2M
Domain	PF00007	Cys_knot	Pfam	1.344e-06	0.0002473	1.546e-05	8.956e-05	3	15	LHB,CGB7,CGB3
Domain	IPR006208	Glyco_hormone_CN	InterPro	1.344e-06	0.0002473	1.546e-05	8.956e-05	3	15	LHB,CGB7,CGB3
Domain	IPR003599	Ig_sub	InterPro	2.167e-06	0.0003987	2.215e-05	0.0001284	7	421	PSG2,PSG3,PSG4,PSG5,PSG6,PSG9,SIGLEC6
Domain	SM00409	IG	SMART	2.167e-06	0.0003987	2.215e-05	0.0001284	7	421	PSG2,PSG3,PSG4,PSG5,PSG6,PSG9,SIGLEC6
Domain	2.60.40.10	-	Gene3D	3.911e-06	0.0007196	3.787e-05	0.0002195	8	663	PSG2,PSG3,PSG4,PSG5,PSG6,PSG9,SIGLEC6,B2M
Domain	IPR013783	Ig-like_fold	InterPro	6.281e-06	0.001156	5.779e-05	0.0003349	8	707	PSG2,PSG3,PSG4,PSG5,PSG6,PSG9,SIGLEC6,B2M
Domain	2.10.90.10	-	Gene3D	0.0001343	0.02472	0.001123	0.00651	3	67	LHB,CGB7,CGB3
Domain	IPR029034	Cystine-knot_cytokine	InterPro	0.0001343	0.02472	0.001123	0.00651	3	67	LHB,CGB7,CGB3
Domain	IPR026181	TMEM40	InterPro	0.001497	0.2754	0.008884	0.05148	1	1	TMEM40
Domain	PS00493	CLUSTERIN_2	PROSITE	0.001497	0.2754	0.008884	0.05148	1	1	CLU
Domain	PF15817	TMEM40	Pfam	0.001497	0.2754	0.008884	0.05148	1	1	TMEM40
Domain	IPR028475	S100-A9	InterPro	0.001497	0.2754	0.008884	0.05148	1	1	S100A9
Domain	IPR008605	ECM1	InterPro	0.001497	0.2754	0.008884	0.05148	1	1	ECM1
Domain	IPR016016	Clusterin	InterPro	0.001497	0.2754	0.008884	0.05148	1	1	CLU
Domain	PS00492	CLUSTERIN_1	PROSITE	0.001497	0.2754	0.008884	0.05148	1	1	CLU
Domain	PF05782	ECM1	Pfam	0.001497	0.2754	0.008884	0.05148	1	1	ECM1
Domain	IPR015707	B2Microglobulin	InterPro	0.001497	0.2754	0.008884	0.05148	1	1	B2M
Domain	IPR016015	Clusterin_C	InterPro	0.002987	0.5496	0.0134	0.07768	1	2	CLU
Domain	IPR012233	PKC	InterPro	0.002987	0.5496	0.0134	0.07768	1	2	PRKCZ
Domain	IPR016014	Clusterin_N	InterPro	0.002987	0.5496	0.0134	0.07768	1	2	CLU
Domain	PF01093	Clusterin	Pfam	0.002987	0.5496	0.0134	0.07768	1	2	CLU
Domain	IPR016965	Pase_PHOSPHO-typ	InterPro	0.002987	0.5496	0.0134	0.07768	1	2	PHOSPHO1
Domain	IPR006384	PyrdxlP_Pase-rel	InterPro	0.002987	0.5496	0.0134	0.07768	1	2	PHOSPHO1
Domain	SM00030	CLb	SMART	0.002987	0.5496	0.0134	0.07768	1	2	CLU
Domain	IPR000753	Clusterin-like	InterPro	0.002987	0.5496	0.0134	0.07768	1	2	CLU
Domain	PF06888	Put_Phosphatase	Pfam	0.002987	0.5496	0.0134	0.07768	1	2	PHOSPHO1
Domain	SM00035	CLa	SMART	0.002987	0.5496	0.0134	0.07768	1	2	CLU
Domain	IPR003006	Ig/MHC_CS	InterPro	0.003381	0.6221	0.01481	0.08583	2	58	SIGLEC6,B2M
Domain	PS00290	IG_MHC	PROSITE	0.003614	0.6649	0.01546	0.08961	2	60	SIGLEC6,B2M
Domain	IPR006715	ETS_PEA3_N	InterPro	0.004477	0.8238	0.01648	0.09548	1	3	ETV5
Domain	PF04621	ETS_PEA3_N	Pfam	0.004477	0.8238	0.01648	0.09548	1	3	ETV5
Domain	PF02115	Rho_GDI	Pfam	0.004477	0.8238	0.01648	0.09548	1	3	ARHGDIB
Domain	IPR006383	HAD-SF_hydro_IB_PSP-like	InterPro	0.004477	0.8238	0.01648	0.09548	1	3	PHOSPHO1
Domain	IPR000406	Rho_GDI	InterPro	0.004477	0.8238	0.01648	0.09548	1	3	ARHGDIB
Domain	2.70.50.30	-	Gene3D	0.004477	0.8238	0.01648	0.09548	1	3	ARHGDIB
Domain	IPR024792	RhoGDI_domain	InterPro	0.004477	0.8238	0.01648	0.09548	1	3	ARHGDIB
Domain	IPR000240	Serpin_B9/Maspin	InterPro	0.005965	1	0.02071	0.12	1	4	SERPINB7
Domain	IPR016245	Tyr_kinase_EGF/ERB/XmrK_rcpt	InterPro	0.005965	1	0.02071	0.12	1	4	EGFR
Domain	IPR002471	Pept_S9_AS	InterPro	0.005965	1	0.02071	0.12	1	4	DPP4
Domain	IPR020858	Serum_albumin-like	InterPro	0.007451	1	0.02493	0.1445	1	5	ECM1
Domain	PS00708	PRO_ENDOPEP_SER	PROSITE	0.007451	1	0.02493	0.1445	1	5	DPP4
Domain	IPR002469	Peptidase_S9B_N	InterPro	0.008935	1	0.02695	0.1562	1	6	DPP4
Domain	IPR000264	ALB/AFP/VDB	InterPro	0.008935	1	0.02695	0.1562	1	6	ECM1
Domain	PF14843	GF_recep_IV	Pfam	0.008935	1	0.02695	0.1562	1	6	EGFR
Domain	2.140.10.30	-	Gene3D	0.008935	1	0.02695	0.1562	1	6	DPP4
Domain	IPR032778	GF_recep_IV	InterPro	0.008935	1	0.02695	0.1562	1	6	EGFR
Domain	PF00930	DPPIV_N	Pfam	0.008935	1	0.02695	0.1562	1	6	DPP4
Domain	PF01030	Recep_L_domain	Pfam	0.01042	1	0.02904	0.1683	1	7	EGFR
Domain	PF00757	Furin-like	Pfam	0.01042	1	0.02904	0.1683	1	7	EGFR
Domain	IPR000494	Rcpt_L-dom	InterPro	0.01042	1	0.02904	0.1683	1	7	EGFR
Domain	IPR006211	Furin-like_Cys-rich_dom	InterPro	0.01042	1	0.02904	0.1683	1	7	EGFR
Domain	3.80.20.20	-	Gene3D	0.01042	1	0.02904	0.1683	1	7	EGFR
Domain	PF02841	GBP_C	Pfam	0.01485	1	0.04058	0.2352	1	10	GBP2
Domain	PS51715	G_GB1_RHD3	PROSITE	0.01632	1	0.04058	0.2352	1	11	GBP2
Domain	PF00326	Peptidase_S9	Pfam	0.01632	1	0.04058	0.2352	1	11	DPP4
Domain	IPR003191	Guanylate-bd_C	InterPro	0.01632	1	0.04058	0.2352	1	11	GBP2
Domain	IPR015894	Guanylate-bd_N	InterPro	0.01632	1	0.04058	0.2352	1	11	GBP2
Domain	IPR001375	Peptidase_S9	InterPro	0.01632	1	0.04058	0.2352	1	11	DPP4
Domain	PF02263	GBP	Pfam	0.01632	1	0.04058	0.2352	1	11	GBP2
Domain	IPR030386	G_GB1_RHD3_dom	InterPro	0.01632	1	0.04058	0.2352	1	11	GBP2
Domain	SM00666	PB1	SMART	0.02073	1	0.0489	0.2834	1	14	PRKCZ
Domain	PF00564	PB1	Pfam	0.02073	1	0.0489	0.2834	1	14	PRKCZ
Domain	PS51745	PB1	PROSITE	0.02073	1	0.0489	0.2834	1	14	PRKCZ
Domain	IPR000270	PB1_dom	InterPro	0.02073	1	0.0489	0.2834	1	14	PRKCZ
Pathway	1268754	Glycoprotein hormones	BioSystems: REACTOME	7.313e-09	2.479e-06	2.479e-06	1.588e-05	4	12	LHB,CGB5,CGB8,CGB3
Pathway	1268753	Peptide hormone biosynthesis	BioSystems: REACTOME	1.475e-08	4.999e-06	2.499e-06	1.601e-05	4	14	LHB,CGB5,CGB8,CGB3
Pathway	1427841	TFAP2 (AP-2) family regulates transcription of growth factors and their receptors	BioSystems: REACTOME	2.674e-08	9.063e-06	3.021e-06	1.935e-05	4	16	CGB5,CGB8,EGFR,CGB3
Pathway	1269340	Hemostasis	BioSystems: REACTOME	3.017e-07	0.0001023	2.557e-05	0.0001638	10	640	PRKCZ,ITGA2,ECM1,PSG2,CLU,PSG3,PSG4,PSG5,PSG6,PSG9
Pathway	1269373	Cell surface interactions at the vascular wall	BioSystems: REACTOME	3.938e-07	0.0001335	2.67e-05	0.000171	6	143	PSG2,PSG3,PSG4,PSG5,PSG6,PSG9
Pathway	1268746	Peptide hormone metabolism	BioSystems: REACTOME	1.088e-06	0.0003689	6.148e-05	0.0003937	5	91	LHB,DPP4,CGB5,CGB8,CGB3
Pathway	1427839	Transcriptional regulation by the AP-2 (TFAP2) family of transcription factors	BioSystems: REACTOME	1.298e-06	0.0004399	6.284e-05	0.0004025	4	40	CGB5,CGB8,EGFR,CGB3
Pubmed	2424697	Evolution of different transcriptional start sites in the human luteinizing hormone and chorionic gonadotropin beta-subunit genes.	Pubmed	2.007e-16	2.307e-12	2.307e-12	2.29e-11	5	5	LHB,CGB7,CGB5,CGB8,CGB3
Pubmed	6690982	Evolution of the genes for the beta subunits of human chorionic gonadotropin and luteinizing hormone.	Pubmed	4.206e-15	4.837e-11	2.418e-11	2.401e-10	5	7	LHB,CGB7,CGB5,CGB8,CGB3
Pubmed	1690992	The human pregnancy-specific glycoprotein genes are tightly linked on the long arm of chromosome 19 and are coordinately expressed.	Pubmed	1.121e-14	1.289e-10	4.297e-11	4.266e-10	5	8	PSG2,PSG4,PSG5,PSG6,PSG9
Pubmed	2452822	Identification of a promoter region in the CG beta gene cluster.	Pubmed	2.976e-13	3.422e-09	8.554e-10	8.492e-09	4	4	CGB7,CGB5,CGB8,CGB3
Pubmed	7851895	Gene organization of the pregnancy-specific glycoprotein region on human chromosome 19: assembly and analysis of a 700-kb cosmid contig spanning the region.	Pubmed	1.233e-12	1.417e-08	2.835e-09	2.814e-08	5	17	PSG3,PSG4,PSG5,PSG6,PSG9
Pubmed	2468994	Isolation and characterization of the human chorionic gonadotropin beta subunit (CG beta) gene cluster: regulation of transcriptionally active CG beta gene by cyclic AMP.	Pubmed	1.486e-12	1.709e-08	2.848e-09	2.827e-08	4	5	CGB7,CGB5,CGB8,CGB3
Pubmed	6194155	The beta subunit of human chorionic gonadotropin is encoded by multiple genes.	Pubmed	4.456e-12	5.124e-08	4.658e-09	4.624e-08	4	6	CGB7,CGB5,CGB8,CGB3
Pubmed	6319099	The human genome contains seven genes for the beta-subunit of chorionic gonadotropin but only one gene for the beta-subunit of luteinizing hormone.	Pubmed	4.456e-12	5.124e-08	4.658e-09	4.624e-08	4	6	CGB7,CGB5,CGB8,CGB3
Pubmed	1371113	Identification of the transcriptionally active genes of the chorionic gonadotropin beta gene cluster in vivo.	Pubmed	4.456e-12	5.124e-08	4.658e-09	4.624e-08	4	6	CGB7,CGB5,CGB8,CGB3
Pubmed	2422163	A map of the hCG beta-LH beta gene cluster.	Pubmed	4.456e-12	5.124e-08	4.658e-09	4.624e-08	4	6	CGB7,CGB5,CGB8,CGB3
Pubmed	6204923	The beta chorionic gonadotropin-beta luteinizing gene cluster maps to human chromosome 19.	Pubmed	4.456e-12	5.124e-08	4.658e-09	4.624e-08	4	6	CGB7,CGB5,CGB8,CGB3
Pubmed	7794280	Characterization of cDNA encoding novel pregnancy-specific glycoprotein variants.	Pubmed	1.039e-11	1.195e-07	9.957e-09	9.885e-08	4	7	PSG4,PSG5,PSG6,PSG9
Pubmed	7851896	The pregnancy-specific glycoprotein (PSG) gene cluster on human chromosome 19: fine structure of the 11 PSG genes and identification of 6 new genes forming a third subgroup within the carcinoembryonic antigen (CEA) family.	Pubmed	2.116e-10	2.433e-06	1.872e-07	1.858e-06	4	13	PSG2,PSG3,PSG4,PSG6
Pubmed	9012484	Malignant transformation of nontrophoblastic cells is associated with the expression of chorionic gonadotropin beta genes normally transcribed in trophoblastic cells.	Pubmed	4.25e-10	4.887e-06	3.054e-07	3.032e-06	3	3	CGB7,CGB5,CGB8
Pubmed	1922019	Characterization of new members of the pregnancy-specific beta 1-glycoprotein family.	Pubmed	4.25e-10	4.887e-06	3.054e-07	3.032e-06	3	3	PSG4,PSG5,PSG9
Pubmed	11861891	Chorionic gonadotropin has a recent origin within primates and an evolutionary history of selection.	Pubmed	4.25e-10	4.887e-06	3.054e-07	3.032e-06	3	3	LHB,CGB7,CGB3
Pubmed	6209613	Only three of the seven human chorionic gonadotropin beta subunit genes can be expressed in the placenta.	Pubmed	1.698e-09	1.952e-05	1.028e-06	1.02e-05	3	4	CGB7,CGB5,CGB8
Pubmed	23469002	Pregnancy-specific glycoproteins bind integrin ?IIb?3 and inhibit the platelet-fibrinogen interaction.	Pubmed	1.698e-09	1.952e-05	1.028e-06	1.02e-05	3	4	ITGA2,PSG4,PSG5
Pubmed	8202136	Crystal structure of human chorionic gonadotropin.	Pubmed	1.698e-09	1.952e-05	1.028e-06	1.02e-05	3	4	CGB7,CGB5,CGB3
Pubmed	2537643	Analysis of the size of the carcinoembryonic antigen (CEA) gene family: isolation and sequencing of N-terminal domain exons.	Pubmed	1.483e-08	0.0001706	8.529e-06	8.467e-05	3	7	PSG4,PSG5,PSG6
Pubmed	25464930	Novel interactive partners of neuroligin 3: new aspects for pathogenesis of autism.	Pubmed	9.155e-08	0.001053	5.012e-05	0.0004976	4	54	PSG3,PSG4,PSG5,CGB3
Pubmed	24631944	S100A9 and EGFR gene signatures predict disease progression in muscle invasive bladder cancer patients after chemotherapy.	Pubmed	5.854e-07	0.006731	0.0002103	0.002088	2	2	S100A9,EGFR
Pubmed	12419040	Assessment of beta-HCG, beta-LH mRNA and ploidy in individual human blastomeres.	Pubmed	5.854e-07	0.006731	0.0002103	0.002088	2	2	LHB,CGB3
Pubmed	30134935	Downregulating CD26/DPPIV by apigenin modulates the interplay between Akt and Snail/Slug signaling to restrain metastasis of lung cancer with multiple EGFR statuses.	Pubmed	5.854e-07	0.006731	0.0002103	0.002088	2	2	DPP4,EGFR
Pubmed	7513655	Eutopic production of human chorionic gonadotropin beta (hCG beta) and luteinizing hormone beta (hLH beta) in the human testis.	Pubmed	5.854e-07	0.006731	0.0002103	0.002088	2	2	LHB,CGB3
Pubmed	1820200	Site-specific N-glycosylation of human chorionic gonadotrophin--structural analysis of glycopeptides by one- and two-dimensional 1H NMR spectroscopy.	Pubmed	5.854e-07	0.006731	0.0002103	0.002088	2	2	CGB7,CGB3
Pubmed	6774259	The cDNA for the beta-subunit of human chorionic gonadotropin suggests evolution of a gene by readthrough into the 3'-untranslated region.	Pubmed	5.854e-07	0.006731	0.0002103	0.002088	2	2	CGB7,CGB3
Pubmed	24144106	Elevated concentrations of milk ?2-microglobulin are associated with increased risk of breastfeeding transmission of HIV-1 (Vertical Transmission Study).	Pubmed	5.854e-07	0.006731	0.0002103	0.002088	2	2	S100A9,B2M
Pubmed	26850110	High mannose-binding Pseudomonas fluorescens lectin (PFL) downregulates cell surface integrin/EGFR and induces autophagy in gastric cancer cells.	Pubmed	5.854e-07	0.006731	0.0002103	0.002088	2	2	ITGA2,EGFR
Pubmed	19002615	No evidence of the human chorionic gonadotropin-beta gene 5 betaV79M polymorphism in Mexican women.	Pubmed	5.854e-07	0.006731	0.0002103	0.002088	2	2	CGB5,CGB3
Pubmed	20407013	Activation by tyrosine phosphorylation as a prerequisite for protein kinase C? to mediate epidermal growth factor receptor signaling to ERK.	Pubmed	5.854e-07	0.006731	0.0002103	0.002088	2	2	PRKCZ,EGFR
Pubmed	7723844	Tumorigenesis and metastasis of neoplastic Kaposi's sarcoma cell line in immunodeficient mice blocked by a human pregnancy hormone.	Pubmed	5.854e-07	0.006731	0.0002103	0.002088	2	2	CGB7,CGB3
Pubmed	26968839	An update on the clinical diagnostic value of ?-hCG and ?FP for intracranial germ cell tumors.	Pubmed	1.754e-06	0.02017	0.0004802	0.004767	2	3	CGB5,CGB3
Pubmed	10468638	Abortive expansion of the cumulus and impaired fertility in mice lacking the prostaglandin E receptor subtype EP(2).	Pubmed	1.754e-06	0.02017	0.0004802	0.004767	2	3	CGB7,CGB3
Pubmed	23951036	Lung cancer cells that survive ionizing radiation show increased integrin ?2?1- and EGFR-dependent invasiveness.	Pubmed	1.754e-06	0.02017	0.0004802	0.004767	2	3	ITGA2,EGFR
Pubmed	7922031	Structure of human chorionic gonadotropin at 2.6 A resolution from MAD analysis of the selenomethionyl protein.	Pubmed	1.754e-06	0.02017	0.0004802	0.004767	2	3	CGB5,CGB3
Pubmed	2341148	Structure, evolution and chromosomal localization of the human pregnancy-specific beta 1 glycoprotein gene family.	Pubmed	1.754e-06	0.02017	0.0004802	0.004767	2	3	PSG3,PSG9
Pubmed	2346748	Characterization of cDNAs of the human pregnancy-specific beta 1-glycoprotein family, a new subfamily of the immunoglobulin gene superfamily.	Pubmed	1.754e-06	0.02017	0.0004802	0.004767	2	3	PSG6,PSG9
Pubmed	2536708	Site specificity of the chorionic gonadotropin N-linked oligosaccharides in signal transduction.	Pubmed	1.754e-06	0.02017	0.0004802	0.004767	2	3	CGB5,CGB3
Pubmed	9578495	Partially deglycosylated human choriogonadotropin, stabilized by intersubunit disulfide bonds, shows full bioactivity.	Pubmed	1.754e-06	0.02017	0.0004802	0.004767	2	3	CGB5,CGB3
Pubmed	2350345	Carcinoembryonic antigen gene family members in submandibular salivary gland: demonstration of pregnancy-specific glycoproteins by cDNA cloning.	Pubmed	1.754e-06	0.02017	0.0004802	0.004767	2	3	PSG2,PSG3
Pubmed	1688430	Role of disulfide bond formation in the folding of human chorionic gonadotropin beta subunit into an alpha beta dimer assembly-competent form.	Pubmed	1.754e-06	0.02017	0.0004802	0.004767	2	3	CGB7,CGB3
Pubmed	2271648	Characterization of two new members of the pregnancy-specific beta 1-glycoprotein family from the myeloid cell line KG-1 and suggestion of two distinct classes of transcription unit.	Pubmed	3.507e-06	0.04032	0.0009163	0.009096	2	4	PSG4,PSG6
Pubmed	2783133	cDNA cloning demonstrates the expression of pregnancy-specific glycoprotein genes, a subgroup of the carcinoembryonic antigen gene family, in fetal liver.	Pubmed	3.507e-06	0.04032	0.0009163	0.009096	2	4	PSG4,PSG6
Pubmed	2377620	Linkage of two human pregnancy-specific beta 1-glycoprotein genes: one is associated with hydatidiform mole.	Pubmed	5.841e-06	0.06716	0.001493	0.01482	2	5	PSG2,PSG6
Pubmed	4368999	Peptide hormones.	Pubmed	1.225e-05	0.1409	0.002026	0.02011	2	7	LHB,CGB3
Pubmed	19199708	Proteomic analysis of human parotid gland exosomes by multidimensional protein identification technology (MudPIT).	Pubmed	1.627e-05	0.1871	0.002026	0.02011	5	416	S100A9,DPP4,ECM1,CLU,B2M
Pubmed	27221710	Platelets contribute to amyloid-? aggregation in cerebral vessels through integrin ?IIb?3-induced outside-in signaling and clusterin release.	Pubmed	1.633e-05	0.1878	0.002026	0.02011	2	8	ITGA2,CLU
Pubmed	30526858	HIPPO signaling resolves embryonic cell fate conflicts during establishment of pluripotency in vivo.	Pubmed	2.099e-05	0.2413	0.002026	0.02011	2	9	ETV5,PRKCZ
Pubmed	23376485	Proteomic analysis of podocyte exosome-enriched fraction from normal human urine.	Pubmed	4.125e-05	0.4743	0.002026	0.02011	8	1744	LHB,S100A9,DPP4,ARHGDIB,ECM1,CLU,PSG4,B2M
Pubmed	29712669	Proliferation-independent role of NF2 (merlin) in limiting biliary morphogenesis.	Pubmed	4.539e-05	0.5219	0.002026	0.02011	2	13	ETV5,PRKCZ
Pubmed	20962046	Abnormal epithelial cell polarity and ectopic epidermal growth factor receptor (EGFR) expression induced in Emx2 KO embryonic gonads.	Pubmed	4.539e-05	0.5219	0.002026	0.02011	2	13	PRKCZ,EGFR
Pubmed	15057824	The DNA sequence and biology of human chromosome 19.	Pubmed	6.786e-05	0.7802	0.002026	0.02011	4	284	PSG2,PSG3,PSG6,PSG9
Pubmed	21423176	Analysis of the myosin-II-responsive focal adhesion proteome reveals a role for ?-Pix in negative regulation of focal adhesion maturation.	Pubmed	6.878e-05	0.7909	0.002026	0.02011	4	285	DPP4,ITGA2,EGFR,B2M
Pubmed	24667918	Differential effects of Tat proteins derived from HIV-1 subtypes B and recombinant CRF02_AG on human brain microvascular endothelial cells: implications for blood-brain barrier dysfunction.	Pubmed	7.547e-05	0.8678	0.002026	0.02011	3	105	ETV5,GBP2,DPP4
Pubmed	29058721	EGFR signalling controls cellular fate and pancreatic organogenesis by regulating apicobasal polarity.	Pubmed	8.881e-05	1	0.002026	0.02011	2	18	PRKCZ,EGFR
Pubmed	19726564	CASK deletion in intestinal epithelia causes mislocalization of LIN7C and the DLG1/Scrib polarity complex without affecting cell polarity.	Pubmed	0.0001102	1	0.002026	0.02011	2	20	PRKCZ,EGFR
Pubmed	19056867	Large-scale proteomics and phosphoproteomics of urinary exosomes.	Pubmed	0.0001144	1	0.002026	0.02011	6	1017	S100A9,DPP4,ARHGDIB,PRKCZ,CLU,B2M
Pubmed	16799092	Dynamic profiling of the post-translational modifications and interaction partners of epidermal growth factor receptor signaling after stimulation by epidermal growth factor using Extended Range Proteomic Analysis (ERPA).	Pubmed	0.0001465	1	0.002026	0.02011	2	23	S100A9,EGFR
Pubmed	21655085	FGF signaling regulates the number of posterior taste papillae by controlling progenitor field size.	Pubmed	0.0001597	1	0.002026	0.02011	2	24	ETV5,EGFR
Pubmed	26809587	The tumor suppressor PTEN and the PDK1 kinase regulate formation of the columnar neural epithelium.	Pubmed	0.0001736	1	0.002026	0.02011	2	25	ETV5,PRKCZ
Pubmed	17170699	ERp57 is essential for efficient folding of glycoproteins sharing common structural domains.	Pubmed	0.0001736	1	0.002026	0.02011	2	25	ITGA2,CLU
Pubmed	27068509	Extracellular matrix remodelling in response to venous hypertension: proteomics of human varicose veins.	Pubmed	0.0002002	1	0.002026	0.02011	3	146	S100A9,ECM1,CLU
Pubmed	16502470	Human colostrum: identification of minor proteins in the aqueous phase by proteomics.	Pubmed	0.0002669	1	0.002026	0.02011	3	161	S100A9,CLU,B2M
Pubmed	8903730	Genetic composition of the recombinant congenic strains.	Pubmed	0.0002682	1	0.002026	0.02011	2	31	EGFR,B2M
Pubmed	17330941	Enhanced analysis of the mouse plasma proteome using cysteine-containing tryptic glycopeptides.	Pubmed	0.0003831	1	0.002026	0.02011	2	37	EGFR,CLU
Pubmed	16263699	Elucidation of N-glycosylation sites on human platelet proteins: a glycoproteomic approach.	Pubmed	0.0004041	1	0.002026	0.02011	2	38	ITGA2,CLU
Pubmed	23863479	Tumor suppressor Nf2 limits expansion of the neural progenitor pool by inhibiting Yap/Taz transcriptional coactivators.	Pubmed	0.000448	1	0.002026	0.02011	2	40	PRKCZ,CLU
Pubmed	23658023	Comparative proteomic analysis of supportive and unsupportive extracellular matrix substrates for human embryonic stem cell maintenance.	Pubmed	0.0007002	1	0.002026	0.02011	2	50	ITGA2,CLU
Pubmed	24006456	Extracellular matrix secretion by cardiac fibroblasts: role of microRNA-29b and microRNA-30c.	Pubmed	0.0007547	1	0.002026	0.02011	3	230	ECM1,CLU,B2M
Pubmed	22521649	EGFR mutations as a predictive marker of cytotoxic chemotherapy.	Pubmed	0.0007785	1	0.002026	0.02011	1	1	EGFR
Pubmed	23171684	Siglec-6 expression is increased in placentas from pregnancies complicated by preterm preeclampsia.	Pubmed	0.0007785	1	0.002026	0.02011	1	1	SIGLEC6
Pubmed	18687326	Shedding of epidermal growth factor receptor is a regulated process that occurs with overexpression in malignant cells.	Pubmed	0.0007785	1	0.002026	0.02011	1	1	EGFR
Pubmed	20018218	Inhibition of CD26/DPP IV attenuates ischemia/reperfusion injury in orthotopic mouse lung transplants: the pivotal role of vasoactive intestinal peptide.	Pubmed	0.0007785	1	0.002026	0.02011	1	1	DPP4
Pubmed	22843317	EGFR exon mutation distribution and outcome in non-small-cell lung cancer: a Portuguese retrospective study.	Pubmed	0.0007785	1	0.002026	0.02011	1	1	EGFR
Pubmed	15389725	Protection of androgen-dependent human prostate cancer cells from oxidative stress-induced DNA damage by overexpression of clusterin and its modulation by androgen.	Pubmed	0.0007785	1	0.002026	0.02011	1	1	CLU
Pubmed	31127085	Candidalysin activates innate epithelial immune responses via epidermal growth factor receptor.	Pubmed	0.0007785	1	0.002026	0.02011	1	1	EGFR
Pubmed	29382302	Clinical management and outcome of patients with advanced NSCLC carrying EGFR mutations in Spain.	Pubmed	0.0007785	1	0.002026	0.02011	1	1	EGFR
Pubmed	27341562	Activity and expression of dipeptidyl peptidase IV on peripheral blood mononuclear cells in patients with early steroid and disease modifying antirheumatic drugs na∩ve rheumatoid arthritis.	Pubmed	0.0007785	1	0.002026	0.02011	1	1	DPP4
Pubmed	12213886	Involvement of dipeptidyl peptidase IV in extravillous trophoblast invasion and differentiation.	Pubmed	0.0007785	1	0.002026	0.02011	1	1	DPP4
Pubmed	18458038	First-line gefitinib in patients with advanced non-small-cell lung cancer harboring somatic EGFR mutations.	Pubmed	0.0007785	1	0.002026	0.02011	1	1	EGFR
Pubmed	19643949	Endobronchial ultrasound-guided transbronchial needle aspiration for identifying EGFR mutations.	Pubmed	0.0007785	1	0.002026	0.02011	1	1	EGFR
Pubmed	15310902	Modulation of hematopoietic stem cell homing and engraftment by CD26.	Pubmed	0.0007785	1	0.002026	0.02011	1	1	DPP4
Pubmed	25193288	Association of rs7260002 of chorionic gonadotrophin ?5 with idiopathic recurrent spontaneous abortion in Chinese population.	Pubmed	0.0007785	1	0.002026	0.02011	1	1	CGB5
Pubmed	30314757	CD8	Pubmed	0.0007785	1	0.002026	0.02011	1	1	B2M
Pubmed	22882234	Loss of CD26 protease activity in recipient mice during hematopoietic stem cell transplantation results in improved transplant efficiency.	Pubmed	0.0007785	1	0.002026	0.02011	1	1	DPP4
Pubmed	16865725	Clusterin is not essential for androgen-regulated involution and regeneration of the normal mouse prostate.	Pubmed	0.0007785	1	0.002026	0.02011	1	1	CLU
Pubmed	27639677	EGFR-Co-Mutated Advanced NSCLC and Response toáEGFR Tyrosine Kinase Inhibitors.	Pubmed	0.0007785	1	0.002026	0.02011	1	1	EGFR
Pubmed	20693985	Epidermal growth factor receptor in adrenocortical tumors: analysis of gene sequence, protein expression and correlation with clinical outcome.	Pubmed	0.0007785	1	0.002026	0.02011	1	1	EGFR
Pubmed	23938604	Enhanced autophagy is required for survival in EGFR-independent EGFR-mutant lung adenocarcinoma cells.	Pubmed	0.0007785	1	0.002026	0.02011	1	1	EGFR
Pubmed	27482886	EGFR regulates macrophage activation and function in bacterial infection.	Pubmed	0.0007785	1	0.002026	0.02011	1	1	EGFR
Pubmed	24724551	Activation of sperm EGFR by light irradiation is mediated by reactive oxygen species.	Pubmed	0.0007785	1	0.002026	0.02011	1	1	EGFR
Pubmed	11831486	Immunohistochemical analysis of epidermal growth factor receptor in cyclosporin A-induced gingival overgrowth.	Pubmed	0.0007785	1	0.002026	0.02011	1	1	EGFR
Pubmed	27449093	Higher frequency but random distribution of EGFR mutation subtypes in familial lung cancer patients.	Pubmed	0.0007785	1	0.002026	0.02011	1	1	EGFR
Pubmed	22179693	EGFR-mediated G1/S transition contributes to the multidrug resistance in breast cancer cells.	Pubmed	0.0007785	1	0.002026	0.02011	1	1	EGFR
Pubmed	28887822	Paracrine crosstalk between endothelial cells and melanocytes through clusterin to inhibit pigmentation.	Pubmed	0.0007785	1	0.002026	0.02011	1	1	CLU
Pubmed	21508367	Inverse correlation between EGFR mutation and FHIT, RASSF1A and RUNX3 methylation in lung adenocarcinoma: relation with smoking status.	Pubmed	0.0007785	1	0.002026	0.02011	1	1	EGFR
Pubmed	28434301	An Asp to Asn mutation is a toxic trigger in beta-2 microglobulin: structure and biophysics.	Pubmed	0.0007785	1	0.002026	0.02011	1	1	B2M
Pubmed	28454879	Expansion of CD26 positive fibroblast population promotes keloid progression.	Pubmed	0.0007785	1	0.002026	0.02011	1	1	DPP4
Pubmed	20847305	Low clusterin levels in high-density lipoprotein associate with insulin resistance, obesity, and dyslipoproteinemia.	Pubmed	0.0007785	1	0.002026	0.02011	1	1	CLU
Pubmed	9268494	Allospecific cytotoxic T cells generated from beta 2m-/- mice in primary MLC: analysis of activation requirements, specificity, and phenotype.	Pubmed	0.0007785	1	0.002026	0.02011	1	1	B2M
Pubmed	7688348	Assembly-dependent expression of antigenic epitopes by beta 2-microglobulin(b).	Pubmed	0.0007785	1	0.002026	0.02011	1	1	B2M
Pubmed	23419507	Preexisting interstitial lung disease is inversely correlated to tumor epidermal growth factor receptor mutation in patients with lung adenocarcinoma.	Pubmed	0.0007785	1	0.002026	0.02011	1	1	EGFR
Pubmed	16344724	Lack of somatic mutations in EGFR tyrosine kinase domain in hepatocellular and nasopharyngeal carcinoma.	Pubmed	0.0007785	1	0.002026	0.02011	1	1	EGFR
Pubmed	30747217	miRNA-223 is an anticancer gene in human non-small cell lung cancer through the PI3K/AKT pathway by targeting EGFR.	Pubmed	0.0007785	1	0.002026	0.02011	1	1	EGFR
Pubmed	7507841	Differential expression of epidermal growth factor receptor (EGF-R) gene and regulation of EGF-R bioactivity by progesterone and estrogen in the adult mouse uterus.	Pubmed	0.0007785	1	0.002026	0.02011	1	1	EGFR
Pubmed	26771606	Transactivation of Epidermal Growth Factor Receptor by G Protein-Coupled Receptors: Recent Progress, Challenges and Future Research.	Pubmed	0.0007785	1	0.002026	0.02011	1	1	EGFR
Pubmed	22190593	EGFR exon 19 insertions: a new family of sensitizing EGFR mutations in lung adenocarcinoma.	Pubmed	0.0007785	1	0.002026	0.02011	1	1	EGFR
Pubmed	25733240	Epidermal growth factor receptor is critical for angiotensin II-mediated hypertrophy in cerebral arterioles.	Pubmed	0.0007785	1	0.002026	0.02011	1	1	EGFR
Pubmed	18832554	Gefitinib first or gefitinib second: is timing everything in the treatment of EGFR mutant non-small cell lung cancer?	Pubmed	0.0007785	1	0.002026	0.02011	1	1	EGFR
Pubmed	25933160	Incorporation of porcine adenovirus 4 fiber protein enhances infectivity of adenovirus vector on dendritic cells: implications for immune-mediated cancer therapy.	Pubmed	0.0007785	1	0.002026	0.02011	1	1	B2M
Pubmed	16126222	Seeding-dependent propagation and maturation of amyloid fibril conformation.	Pubmed	0.0007785	1	0.002026	0.02011	1	1	B2M
Pubmed	24124538	Frequency of EGFR mutations in 907 lung adenocarcioma patients of Indian ethnicity.	Pubmed	0.0007785	1	0.002026	0.02011	1	1	EGFR
Pubmed	8224878	The cDNA sequence encoding human protein kinase C-zeta.	Pubmed	0.0007785	1	0.002026	0.02011	1	1	PRKCZ
Pubmed	6162896	Evidence for linkage of murine beta 2-microglobulin to H-3 and Ly-4.	Pubmed	0.0007785	1	0.002026	0.02011	1	1	B2M
Pubmed	22895139	First-line gefitinib in patients aged 75 or older with advanced non-small cell lung cancer harboring epidermal growth factor receptor mutations: NEJ 003 study.	Pubmed	0.0007785	1	0.002026	0.02011	1	1	EGFR
Pubmed	20859196	Impact of epidermal growth factor receptor expression on disease-free survival and rate of pelvic relapse in patients with advanced cancer of the cervix treated with chemoradiotherapy.	Pubmed	0.0007785	1	0.002026	0.02011	1	1	EGFR
Pubmed	26488311	Glycosylation of Human Plasma Clusterin Yields a Novel Candidate Biomarker of Alzheimer's Disease.	Pubmed	0.0007785	1	0.002026	0.02011	1	1	CLU
Pubmed	16024039	Competing pathways determine fibril morphology in the self-assembly of beta2-microglobulin into amyloid.	Pubmed	0.0007785	1	0.002026	0.02011	1	1	B2M
Pubmed	21292787	Expression and mutation analysis of EGFR, c-KIT, and ?-catenin in pulmonary blastoma.	Pubmed	0.0007785	1	0.002026	0.02011	1	1	EGFR
Pubmed	18708048	Lymphatic-specific expression of dipeptidyl peptidase IV and its dual role in lymphatic endothelial function.	Pubmed	0.0007785	1	0.002026	0.02011	1	1	DPP4
Pubmed	12939263	Aldosterone stimulates epidermal growth factor receptor expression.	Pubmed	0.0007785	1	0.002026	0.02011	1	1	EGFR
Pubmed	22157759	Regulation of the ligand-dependent activation of the epidermal growth factor receptor by calmodulin.	Pubmed	0.0007785	1	0.002026	0.02011	1	1	EGFR
Pubmed	23905844	Deletion of Prkcz increases intermittent ethanol consumption in mice.	Pubmed	0.0007785	1	0.002026	0.02011	1	1	PRKCZ
Pubmed	23387315	High expression of epidermal growth factor receptor might predict poor survival in patients with colon cancer: a meta-analysis.	Pubmed	0.0007785	1	0.002026	0.02011	1	1	EGFR
Pubmed	24129702	Distinct temporal patterns of T cell receptor signaling during positive versus negative selection in situ.	Pubmed	0.0007785	1	0.002026	0.02011	1	1	B2M
Pubmed	7752576	Tyrosine kinase activity of the EGF receptor in murine metanephric organ culture.	Pubmed	0.0007785	1	0.002026	0.02011	1	1	EGFR
Pubmed	17224267	EGFR mutations and human papillomavirus in squamous cell carcinoma of tongue and tonsil.	Pubmed	0.0007785	1	0.002026	0.02011	1	1	EGFR
Pubmed	21984704	Induction of immunogenic apoptosis by blockade of epidermal growth factor receptor activation with a specific antibody.	Pubmed	0.0007785	1	0.002026	0.02011	1	1	EGFR
Pubmed	10772657	Lethal host-versus-graft disease and hypereosinophilia in the absence of MHC I-T-cell interactions.	Pubmed	0.0007785	1	0.002026	0.02011	1	1	B2M
Pubmed	30104348	Altered conformational landscape and dimerization dependency underpins the activation of EGFR by	Pubmed	0.0007785	1	0.002026	0.02011	1	1	EGFR
Pubmed	18245532	The prognostic significance of serum beta2 microglobulin levels in acute myeloid leukemia and prognostic scores predicting survival: analysis of 1,180 patients.	Pubmed	0.0007785	1	0.002026	0.02011	1	1	B2M
Pubmed	10880264	Mechanisms of CD26/dipeptidyl peptidase IV cytokine-dependent regulation on human activated lymphocytes.	Pubmed	0.0007785	1	0.002026	0.02011	1	1	DPP4
Pubmed	25249428	A phase II study of erlotinib monotherapy in pre-treated non-small cell lung cancer without EGFR gene mutation who have never/light smoking history: re-evaluation of EGFR gene status (NEJ006/TCOG0903).	Pubmed	0.0007785	1	0.002026	0.02011	1	1	EGFR
Pubmed	29386390	Family with sequence similarity 13, member A modulates adipocyte insulin signaling and preserves systemic metabolic homeostasis.	Pubmed	0.0007785	1	0.002026	0.02011	1	1	FAM13A
Pubmed	26264748	Quantitative analysis reveals how EGFR activation and downregulation are coupled in normal but not in cancer cells.	Pubmed	0.0007785	1	0.002026	0.02011	1	1	EGFR
Pubmed	21067705	Mechanisms of myogenic tone of coronary arteriole: Role of down stream signaling of the EGFR tyrosine kinase.	Pubmed	0.0007785	1	0.002026	0.02011	1	1	EGFR
Pubmed	23877363	Detection of EGFRvIII mutant DNA in the peripheral blood of brain tumor patients.	Pubmed	0.0007785	1	0.002026	0.02011	1	1	EGFR
Pubmed	24419411	A prospective, molecular epidemiology study of EGFR mutations in Asian patients with advanced non-small-cell lung cancer of adenocarcinoma histology (PIONEER).	Pubmed	0.0007785	1	0.002026	0.02011	1	1	EGFR
Pubmed	21900379	Circulating clusterin (apolipoprotein J) levels do not have any day/night variability and are positively associated with total and LDL cholesterol levels in young healthy individuals.	Pubmed	0.0007785	1	0.002026	0.02011	1	1	CLU
Pubmed	27371767	Impact of active smoking on survival of patients with metastatic lung adenocarcinoma harboring an epidermal growth factor receptor (EGFR) mutation.	Pubmed	0.0007785	1	0.002026	0.02011	1	1	EGFR
Pubmed	23086434	EGFR mutation status in brain metastases of non-small cell lung carcinoma.	Pubmed	0.0007785	1	0.002026	0.02011	1	1	EGFR
Pubmed	1487145	The cDNA sequence, expression pattern and protein characteristics of mouse protein kinase C-zeta.	Pubmed	0.0007785	1	0.002026	0.02011	1	1	PRKCZ
Pubmed	27832086	Serum Calprotectin Discriminates Subclinical Disease Activity from Ultrasound-Defined Remission in Patients with Rheumatoid Arthritis in Clinical Remission.	Pubmed	0.0007785	1	0.002026	0.02011	1	1	S100A9
Pubmed	12133497	[Detection of serum epidermal growth factor receptor in the diagnosis of proliferation of pituitary adenomas].	Pubmed	0.0007785	1	0.002026	0.02011	1	1	EGFR
Pubmed	12654182	[Significance of expression of epidermal growth factor (EGF) and its receptor (EGFR) in chronic cholecystitis and gallbladder carcinoma].	Pubmed	0.0007785	1	0.002026	0.02011	1	1	EGFR
Pubmed	8434008	cDNA cloning of a human mRNA preferentially expressed in hematopoietic cells and with homology to a GDP-dissociation inhibitor for the rho GTP-binding proteins.	Pubmed	0.0007785	1	0.002026	0.02011	1	1	ARHGDIB
Pubmed	30026325	Oligosaccharyltransferase Inhibition Overcomes Therapeutic Resistance to EGFR Tyrosine Kinase Inhibitors.	Pubmed	0.0007785	1	0.002026	0.02011	1	1	EGFR
Pubmed	16275144	Two different stages of epidermal growth factor (EGF) receptor endocytosis are sensitive to free ubiquitin depletion produced by proteasome inhibitor MG132.	Pubmed	0.0007785	1	0.002026	0.02011	1	1	EGFR
Pubmed	30172266	[Clinical Features of EGFR Double Mutation in Non-small Cell Lung Cancer].	Pubmed	0.0007785	1	0.002026	0.02011	1	1	EGFR
Pubmed	21159653	Role of survivin in EGFR inhibitor-induced apoptosis in non-small cell lung cancers positive for EGFR mutations.	Pubmed	0.0007785	1	0.002026	0.02011	1	1	EGFR
Pubmed	20930273	Linkage to the 8p21.1 region Including the CLU gene in age at onset stratified alzheimer's disease families.	Pubmed	0.0007785	1	0.002026	0.02011	1	1	CLU
Pubmed	8565829	Two distinct phases of apoptosis in mammary gland involution: proteinase-independent and -dependent pathways.	Pubmed	0.0007785	1	0.002026	0.02011	1	1	CLU
Pubmed	23384599	TGF-?/HA complex promotes tympanic membrane keratinocyte migration and proliferation via ErbB1 receptor.	Pubmed	0.0007785	1	0.002026	0.02011	1	1	EGFR
Pubmed	18957054	Association of epidermal growth factor receptor (EGFR) gene mutations with EGFR amplification in advanced non-small cell lung cancer.	Pubmed	0.0007785	1	0.002026	0.02011	1	1	EGFR
Pubmed	21397462	Neural hyperactivation in carriers of the Alzheimer's risk variant on the clusterin gene.	Pubmed	0.0007785	1	0.002026	0.02011	1	1	CLU
Pubmed	27196961	Treatment of EGFR-Mutant Lung Cancers After Progression in Patients Receiving First-Line EGFR Tyrosine Kinase Inhibitors : A Review.	Pubmed	0.0007785	1	0.002026	0.02011	1	1	EGFR
Pubmed	28452222	Application of Nanosecond Laser Photolysis Protein Footprinting to Study EGFR Activation by EGF in Cells.	Pubmed	0.0007785	1	0.002026	0.02011	1	1	EGFR
Pubmed	20139181	Hypoxia-induced proliferation of human pulmonary microvascular endothelial cells depends on epidermal growth factor receptor tyrosine kinase activation.	Pubmed	0.0007785	1	0.002026	0.02011	1	1	EGFR
Pubmed	30122764	[Correlation between the new lung adenocarcinoma classification and epidermal growth factor receptor mutation].	Pubmed	0.0007785	1	0.002026	0.02011	1	1	EGFR
Pubmed	2478889	Ionomycin-regulated phosphorylation of the myeloid calcium-binding protein p14.	Pubmed	0.0007785	1	0.002026	0.02011	1	1	S100A9
Pubmed	21199998	Epidermal growth factor receptor mediates the vascular dysfunction but not the remodeling induced by aldosterone/salt.	Pubmed	0.0007785	1	0.002026	0.02011	1	1	EGFR
Pubmed	19170657	Lipid rafts enriched in phosphatidylglucoside direct astroglial differentiation by regulating tyrosine kinase activity of epidermal growth factor receptors.	Pubmed	0.0007785	1	0.002026	0.02011	1	1	EGFR
Pubmed	16920948	MHC class I-like MILL molecules are beta2-microglobulin-associated, GPI-anchored glycoproteins that do not require TAP for cell surface expression.	Pubmed	0.0007785	1	0.002026	0.02011	1	1	B2M
Pubmed	12675218	Dipeptidyl peptidase IV substrates. An update on in vitro peptide hydrolysis by human DPPIV.	Pubmed	0.0007785	1	0.002026	0.02011	1	1	DPP4
Pubmed	27012600	Substance-specific importance of EGFR for vascular smooth muscle cells motility in primary culture.	Pubmed	0.0007785	1	0.002026	0.02011	1	1	EGFR
Pubmed	17227773	Membrane-permeable calmodulin inhibitors (e.g. W-7/W-13) bind to membranes, changing the electrostatic surface potential: dual effect of W-13 on epidermal growth factor receptor activation.	Pubmed	0.0007785	1	0.002026	0.02011	1	1	EGFR
Pubmed	23956990	Molecular imaging of nonsmall cell lung carcinomas expressing active mutant EGFR kinase using PET with [(124)i]-morpholino-IPQA.	Pubmed	0.0007785	1	0.002026	0.02011	1	1	EGFR
Pubmed	21722621	Standardization of epidermal growth factor receptor (EGFR) measurement by quantitative immunofluorescence and impact on antibody-based mutation detection in non-small cell lung cancer.	Pubmed	0.0007785	1	0.002026	0.02011	1	1	EGFR
Pubmed	24204802	A missense mutation in the transcription factor ETV5 leads to sterility, increased embryonic and perinatal death, postnatal growth restriction, renal asymmetry and polydactyly in the mouse.	Pubmed	0.0007785	1	0.002026	0.02011	1	1	ETV5
Pubmed	15042583	Activation of epidermal growth factor receptor causes astrocytes to form cribriform structures.	Pubmed	0.0007785	1	0.002026	0.02011	1	1	EGFR
Pubmed	20856226	Epidermal growth factor induces cytokeratin 19 expression accompanied by increased growth abilities in human hepatocellular carcinoma.	Pubmed	0.0007785	1	0.002026	0.02011	1	1	EGFR
Pubmed	20421278	Difficulties in diagnosis and treatment of thymic adenocarcinoma producing beta-human chorionic gonadotropin in anterior mediastinum.	Pubmed	0.0007785	1	0.002026	0.02011	1	1	CGB3
Pubmed	26341921	Afatinib plus Cetuximab Delays Resistance Compared to Single-Agent Erlotinib or Afatinib in Mouse Models of TKI-Na∩ve EGFR L858R-Induced Lung Adenocarcinoma.	Pubmed	0.0007785	1	0.002026	0.02011	1	1	EGFR
Pubmed	17544492	Protein kinase Czeta: a novel protective neonatal T-cell marker that can be upregulated by allergy prevention strategies.	Pubmed	0.0007785	1	0.002026	0.02011	1	1	PRKCZ
Pubmed	9176390	Genetically null mice reveal a central role for epidermal growth factor receptor in the differentiation of the hair follicle and normal hair development.	Pubmed	0.0007785	1	0.002026	0.02011	1	1	EGFR
Pubmed	21965733	Down-regulation of EGFR prolonged cell growth of glioma but did not increase the sensitivity to temozolomide.	Pubmed	0.0007785	1	0.002026	0.02011	1	1	EGFR
Pubmed	13679441	Epidermal growth factor receptor regulates normal urothelial regeneration.	Pubmed	0.0007785	1	0.002026	0.02011	1	1	EGFR
Pubmed	19459926	Serum level of CD26 predicts time to first treatment in early B-chronic lymphocytic leukemia.	Pubmed	0.0007785	1	0.002026	0.02011	1	1	DPP4
Pubmed	17092939	The epidermal growth factor receptor (EGFR) tyrosine kinase inhibitor AG1478 increases the formation of inactive untethered EGFR dimers. Implications for combination therapy with monoclonal antibody 806.	Pubmed	0.0007785	1	0.002026	0.02011	1	1	EGFR
Pubmed	1551440	SP-40,40, a protein involved in the control of the complement pathway, possesses a unique array of disulphide bridges.	Pubmed	0.0007785	1	0.002026	0.02011	1	1	CLU
Pubmed	26992252	Expression and Clinical Significance of Serum Dipeptidyl Peptidase IV Chronic Obstructive Pulmonary Disease.	Pubmed	0.0007785	1	0.002026	0.02011	1	1	DPP4
Pubmed	25009007	Mutant allele frequency predicts the efficacy of EGFR-TKIs in lung adenocarcinoma harboring the L858R mutation.	Pubmed	0.0007785	1	0.002026	0.02011	1	1	EGFR
Pubmed	26196244	CEACAM1 regulates integrin ?IIb?3-mediated functions in platelets.	Pubmed	0.0007785	1	0.002026	0.02011	1	1	ITGA2
Pubmed	22473698	Molecular characterization of EGFR and EGFR-downstream pathways in triple negative breast carcinomas with basal like features.	Pubmed	0.0007785	1	0.002026	0.02011	1	1	EGFR
Pubmed	12968074	Molecular dynamics simulations of the unfolding of beta(2)-microglobulin and its variants.	Pubmed	0.0007785	1	0.002026	0.02011	1	1	B2M
Pubmed	19766894	Epidermal growth factor promotes epidermal growth factor receptor nuclear accumulation by a pathway dependent on cytoskeleton integrity in human breast cancer cells.	Pubmed	0.0007785	1	0.002026	0.02011	1	1	EGFR
Pubmed	24712396	Epidermal growth factor receptor (EGFR) mutations as biomarker for head and neck squamous cell carcinomas (HNSCC).	Pubmed	0.0007785	1	0.002026	0.02011	1	1	EGFR
Pubmed	14715707	Transcriptional regulation of the human chorionic gonadotropin beta gene during villous trophoblast differentiation.	Pubmed	0.0007785	1	0.002026	0.02011	1	1	CGB5
Pubmed	23212463	Human tenocytes are stimulated to proliferate by acetylcholine through an EGFR signalling pathway.	Pubmed	0.0007785	1	0.002026	0.02011	1	1	EGFR
Pubmed	26081122	Increased concentration of clusterin/apolipoprotein J (apoJ) in hyperlipemic serum is paradoxically associated with decreased apoJ content in lipoproteins.	Pubmed	0.0007785	1	0.002026	0.02011	1	1	CLU
Pubmed	21613253	The only proposed T-cell epitope derived from the TEL-AML1 translocation is not naturally processed.	Pubmed	0.0007785	1	0.002026	0.02011	1	1	B2M
Pubmed	29547059	Relation of EGFR Mutation Status to Metabolic Activity in Localized Lung Adenocarcinoma and Its Influence on the Use of FDG PET/CT Parameters in Prognosis.	Pubmed	0.0007785	1	0.002026	0.02011	1	1	EGFR
Pubmed	25703218	Genetic associations of CLU rs9331888 polymorphism with Alzheimer's disease: A meta-analysis.	Pubmed	0.0007785	1	0.002026	0.02011	1	1	CLU
Pubmed	21501367	Neisseria gonorrhoeae-induced transactivation of EGFR enhances gonococcal invasion.	Pubmed	0.0007785	1	0.002026	0.02011	1	1	EGFR
Pubmed	23074112	EGFR polymorphism as a predictor of clinical outcome in advanced lung cancer patients treated with EGFR-TKI.	Pubmed	0.0007785	1	0.002026	0.02011	1	1	EGFR
Pubmed	15746034	Somatic mutations of epidermal growth factor receptor in colorectal carcinoma.	Pubmed	0.0007785	1	0.002026	0.02011	1	1	EGFR
Pubmed	26759242	EGFR Signaling Enhances Aerobic Glycolysis in Triple-Negative Breast Cancer Cells to Promote Tumor Growth and Immune Escape.	Pubmed	0.0007785	1	0.002026	0.02011	1	1	EGFR
Pubmed	23232551	Ligation of CM1 enhances apoptosis of lung cancer cells through different mechanisms in conformity with EGFR mutation.	Pubmed	0.0007785	1	0.002026	0.02011	1	1	EGFR
Pubmed	23161041	Platelet glycoprotein IaC807T polymorphisms and ischemic stroke in young Chinese Han population.	Pubmed	0.0007785	1	0.002026	0.02011	1	1	ITGA2
Pubmed	26514492	Correlation between EGFR Gene Mutations and Lung Cancer: a Hospital-Based Study.	Pubmed	0.0007785	1	0.002026	0.02011	1	1	EGFR
Pubmed	23601297	[Predictive role of EGFR mutation status on postoperative prognosis in patients with resected lung adenocarcinomas].	Pubmed	0.0007785	1	0.002026	0.02011	1	1	EGFR
Pubmed	15738541	Mutations of the epidermal growth factor receptor gene predict prolonged survival after gefitinib treatment in patients with non-small-cell lung cancer with postoperative recurrence.	Pubmed	0.0007785	1	0.002026	0.02011	1	1	EGFR
Pubmed	23019586	Epidermal growth factor receptor is a preferred target for treating amyloid-?-induced memory loss.	Pubmed	0.0007785	1	0.002026	0.02011	1	1	EGFR
Pubmed	21357425	The cancer/testis antigen prostate-associated gene 4 (PAGE4) is a highly intrinsically disordered protein.	Pubmed	0.0007785	1	0.002026	0.02011	1	1	PAGE4
Pubmed	23374349	Conformational coupling across the plasma membrane in activation of the EGF receptor.	Pubmed	0.0007785	1	0.002026	0.02011	1	1	EGFR
Pubmed	27093978	Epidermal growth factor receptor mutation and pattern of brain metastasis in patients with non-small cell lung cancer.	Pubmed	0.0007785	1	0.002026	0.02011	1	1	EGFR
Pubmed	20939760	Epidermal growth factor receptor (EGFR) mutation and p-EGFR expression in resected non-small cell lung cancer.	Pubmed	0.0007785	1	0.002026	0.02011	1	1	EGFR
Pubmed	20584285	Serum CD26 is related to histopathological polyp traits and behaves as a marker for colorectal cancer and advanced adenomas.	Pubmed	0.0007785	1	0.002026	0.02011	1	1	DPP4
Pubmed	19898258	A phase II trial of erlotinib monotherapy in pretreated patients with advanced non-small cell lung cancer who do not possess active EGFR mutations: Okayama Lung Cancer Study Group trial 0705.	Pubmed	0.0007785	1	0.002026	0.02011	1	1	EGFR
Pubmed	24512728	Curcumin lowers erlotinib resistance in non-small cell lung carcinoma cells with mutated EGF receptor.	Pubmed	0.0007785	1	0.002026	0.02011	1	1	EGFR
Pubmed	29516992	Correlation between epidermal growth factor receptor mutation and histologic subtypes or characteristics of computed tomography findings in patients with resected pulmonary adenocarcinoma.	Pubmed	0.0007785	1	0.002026	0.02011	1	1	EGFR
Pubmed	12489849	PAGE4 is a cytoplasmic protein that is expressed in normal prostate and in prostate cancers.	Pubmed	0.0007785	1	0.002026	0.02011	1	1	PAGE4
Pubmed	18704985	Copy number gains in EGFR and copy number losses in PTEN are common events in osteosarcoma tumors.	Pubmed	0.0007785	1	0.002026	0.02011	1	1	EGFR
Pubmed	6785294	Hypogonadism in a male with an immunologically active, biologically inactive luteinizing hormone: characterization of the abnormal hormone.	Pubmed	0.0007785	1	0.002026	0.02011	1	1	LHB
Pubmed	25300619	TGF-?-induced hCG-? regulates redox homeostasis in glioma cells.	Pubmed	0.0007785	1	0.002026	0.02011	1	1	CGB5
Pubmed	24039832	EGFR exon-level biomarkers of the response to bevacizumab/erlotinib in non-small cell lung cancer.	Pubmed	0.0007785	1	0.002026	0.02011	1	1	EGFR
Pubmed	21036744	EGFR-activating mutations are not present in breast tumors of Japanese patients.	Pubmed	0.0007785	1	0.002026	0.02011	1	1	EGFR
Pubmed	21299233	A peptidomics strategy to elucidate the proteolytic pathways that inactivate peptide hormones.	Pubmed	0.0007785	1	0.002026	0.02011	1	1	DPP4
Pubmed	18528899	Identification of the rare EGFR mutation p.G796S as somatic and germline mutation in white patients with squamous cell carcinoma of the head and neck.	Pubmed	0.0007785	1	0.002026	0.02011	1	1	EGFR
Pubmed	1531458	Blockade of transgenic gamma delta T cell development in beta 2-microglobulin deficient mice.	Pubmed	0.0007785	1	0.002026	0.02011	1	1	B2M
Pubmed	21568938	Permissive effect of EGFR-activated pathways on RVI and their anti-apoptotic effect in hypertonicity-exposed mIMCD3 cells.	Pubmed	0.0007785	1	0.002026	0.02011	1	1	EGFR
Pubmed	22895145	Clinicopathological characteristics of 11 NSCLC patients with EGFR-exon 20 mutations.	Pubmed	0.0007785	1	0.002026	0.02011	1	1	EGFR
Pubmed	11169447	Activated T lymphocytes bind in situ to stromal tissue of colon carcinoma but lack adhesion to tumor cells.	Pubmed	0.0007785	1	0.002026	0.02011	1	1	ITGA2
Pubmed	8006022	Subtle differences in human pregnancy-specific glycoprotein gene promoters allow for differential expression.	Pubmed	0.0007785	1	0.002026	0.02011	1	1	PSG6
Pubmed	20799334	ETV5 regulates sertoli cell chemokines involved in mouse stem/progenitor spermatogonia maintenance.	Pubmed	0.0007785	1	0.002026	0.02011	1	1	ETV5
Pubmed	25222135	Role of Kinase Epidermal Growth Factor Receptor and SRC in the Caerulein-Induced Acute Pancreatitis in Mice.	Pubmed	0.0007785	1	0.002026	0.02011	1	1	EGFR
Pubmed	17374561	EGF receptor is involved in WNT3a-mediated proliferation and motility of NIH3T3 cells via ERK pathway activation.	Pubmed	0.0007785	1	0.002026	0.02011	1	1	EGFR
Pubmed	28088511	EGFR L858M/L861Q cis Mutations Confer Selective Sensitivity to Afatinib.	Pubmed	0.0007785	1	0.002026	0.02011	1	1	EGFR
Pubmed	18794545	EGFR mutations predict survival benefit from gefitinib in patients with advanced lung adenocarcinoma: a historical comparison of patients treated before and after gefitinib approval in Japan.	Pubmed	0.0007785	1	0.002026	0.02011	1	1	EGFR
Pubmed	16524970	Comparison of the epidermal growth factor receptor gene and protein in primary non-small-cell-lung cancer and metastatic sites: implications for treatment with EGFR-inhibitors.	Pubmed	0.0007785	1	0.002026	0.02011	1	1	EGFR
Pubmed	15705969	Bronchial epithelial compression regulates epidermal growth factor receptor family ligand expression in an autocrine manner.	Pubmed	0.0007785	1	0.002026	0.02011	1	1	EGFR
Pubmed	25577449	Beta-2 microglobulin predicts the outcome after autologous stem cell transplantation in non-Hodgkin lymphoma.	Pubmed	0.0007785	1	0.002026	0.02011	1	1	B2M
Pubmed	23461856	Cancer stem-like cell properties are regulated by EGFR/AKT/?-catenin signaling and preferentially inhibited by gefitinib in nasopharyngeal carcinoma.	Pubmed	0.0007785	1	0.002026	0.02011	1	1	EGFR
Pubmed	11773049	Intestinal dipeptidyl peptidase IV is efficiently sorted to the apical membrane through the concerted action of N- and O-glycans as well as association with lipid microdomains.	Pubmed	0.0007785	1	0.002026	0.02011	1	1	DPP4
Pubmed	17372022	TGF-beta1-mediated control of central nervous system inflammation and autoimmunity through the inhibitory receptor CD26.	Pubmed	0.0007785	1	0.002026	0.02011	1	1	DPP4
Pubmed	16410673	Association of common LH variant with hyperfunctional promoter in a Japanese infertile woman.	Pubmed	0.0007785	1	0.002026	0.02011	1	1	LHB
Pubmed	22760226	Efficacy of EGFR tyrosine kinase inhibitors for non-adenocarcinoma NSCLC patients with EGFR mutation.	Pubmed	0.0007785	1	0.002026	0.02011	1	1	EGFR
Pubmed	19347870	Down-regulation of epidermal growth factor receptor induced by estrogens and phytoestrogens promotes the differentiation of U2OS human osteosarcoma cells.	Pubmed	0.0007785	1	0.002026	0.02011	1	1	EGFR
Pubmed	12164862	Involvement of HB-EGF and EGF receptor transactivation in TGF-beta-mediated fibronectin expression in mesangial cells.	Pubmed	0.0007785	1	0.002026	0.02011	1	1	EGFR
Pubmed	26755650	Longitudinal monitoring of EGFR mutations in plasma predicts outcomes of NSCLC patients treated with EGFR TKIs: Korean Lung Cancer Consortium (KLCC-12-02).	Pubmed	0.0007785	1	0.002026	0.02011	1	1	EGFR
Pubmed	26027747	Epidermal growth factor receptor as a novel molecular target for aggressive papillary tumors in the middle ear and temporal bone.	Pubmed	0.0007785	1	0.002026	0.02011	1	1	EGFR
Pubmed	11030148	Activation of the alpha2beta1 integrin prevents c-erbB2-induced scattering and apoptosis of human mammary epithelial cells in collagen.	Pubmed	0.0007785	1	0.002026	0.02011	1	1	ITGA2
Pubmed	28891752	Development of EMab-51, a Sensitive and Specific Anti-Epidermal Growth Factor Receptor Monoclonal Antibody in Flow Cytometry, Western Blot, and Immunohistochemistry.	Pubmed	0.0007785	1	0.002026	0.02011	1	1	EGFR
Pubmed	7490113	Oestrogen influences CD4+ T-lymphocyte activity in vivo and in vitro in beta 2-microglobulin-deficient mice.	Pubmed	0.0007785	1	0.002026	0.02011	1	1	B2M
Pubmed	28061541	A prospective, multicenter phase II trial of low-dose erlotinib as maintenance treatment after platinum doublet chemotherapy for advanced non-small cell lung cancer harboring EGFR mutation.	Pubmed	0.0007785	1	0.002026	0.02011	1	1	EGFR
Pubmed	21524465	Association between hormone receptor expression and epidermal growth factor receptor mutation in patients operated on for non-small cell lung cancer.	Pubmed	0.0007785	1	0.002026	0.02011	1	1	EGFR
Pubmed	12746844	Luteinizing hormone beta polymorphism and risk of familial and sporadic prostate cancer.	Pubmed	0.0007785	1	0.002026	0.02011	1	1	LHB
Pubmed	17638075	Lyso-GM3, its dimer, and multimer: their synthesis, and their effect on epidermal growth factor-induced receptor tyrosine kinase.	Pubmed	0.0007785	1	0.002026	0.02011	1	1	EGFR
Pubmed	26266520	Antitumoral activity of tyrosine kinase inhibitors in patients with non-small cell lung cancer harbouring rare epidermal growth factor receptor mutations.	Pubmed	0.0007785	1	0.002026	0.02011	1	1	EGFR
Pubmed	29669739	Tissue stiffening promotes keratinocyte proliferation through activation of epidermal growth factor signaling.	Pubmed	0.0007785	1	0.002026	0.02011	1	1	EGFR
Pubmed	12871585	Prevention of NMDA-induced death of cortical neurons by inhibition of protein kinase Czeta.	Pubmed	0.0007785	1	0.002026	0.02011	1	1	PRKCZ
Pubmed	30136129	Association of CD26/dipeptidyl peptidase IV mRNA level in peripheral blood mononuclear cells with disease activity and bone erosion in rheumatoid arthritis.	Pubmed	0.0007785	1	0.002026	0.02011	1	1	DPP4
Pubmed	21633299	Prognostic significance of clusterin expression in advanced-stage cervical cancer treated with curative intended radiotherapy.	Pubmed	0.0007785	1	0.002026	0.02011	1	1	CLU
Pubmed	15905572	Myeloid-related protein-14 is a p38 MAPK substrate in human neutrophils.	Pubmed	0.0007785	1	0.002026	0.02011	1	1	S100A9
Pubmed	29516969	Detection of epidermal growth factor receptor mutation in the peripheral blood of patients with esophageal carcinoma to guide epidermal growth factor receptor-tyrosine kinase inhibitor treatment.	Pubmed	0.0007785	1	0.002026	0.02011	1	1	EGFR
Pubmed	23698748	Peptide vaccines and peptidomimetics of EGFR (HER-1) ligand binding domain inhibit cancer cell growth in vitro and in vivo.	Pubmed	0.0007785	1	0.002026	0.02011	1	1	EGFR
Pubmed	25301443	Pemetrexed-based chemotherapy in advanced lung adenocarcinoma patients with different EGFR genotypes.	Pubmed	0.0007785	1	0.002026	0.02011	1	1	EGFR
Pubmed	15591223	Modulation of clusterin isoforms is associated with all-trans retinoic acid-induced proliferative arrest and apoptosis of intimal smooth muscle cells.	Pubmed	0.0007785	1	0.002026	0.02011	1	1	CLU
Pubmed	24789720	The application of real-time PCR technique to detect rare cell clones with primary T790M Substitution of EGFR gene in metastases of non-small cell lung cancer to central nervous system in chemotherapy naive patients.	Pubmed	0.0007785	1	0.002026	0.02011	1	1	EGFR
Pubmed	26990359	Detection of an EGFR mutation in cytological specimens of lung adenocarcinoma.	Pubmed	0.0007785	1	0.002026	0.02011	1	1	EGFR
Pubmed	21068391	Effect of tetracyclines on the dynamics of formation and destructuration of beta2-microglobulin amyloid fibrils.	Pubmed	0.0007785	1	0.002026	0.02011	1	1	B2M
Pubmed	19487967	Discordance of molecular biomarkers associated with epidermal growth factor receptor pathway between primary tumors and lymph node metastasis in non-small cell lung cancer.	Pubmed	0.0007785	1	0.002026	0.02011	1	1	EGFR
Pubmed	20461251	Phosphotyrosine signaling analysis of site-specific mutations on EGFRvIII identifies determinants governing glioblastoma cell growth.	Pubmed	0.0007785	1	0.002026	0.02011	1	1	EGFR
Pubmed	16331665	Nuclear clusterin accumulation during heat shock response: implications for cell survival and thermo-tolerance induction in immortalized and prostate cancer cells.	Pubmed	0.0007785	1	0.002026	0.02011	1	1	CLU
Pubmed	22039281	The role of the molecular footprint of EGFR in tailoring treatment decisions in NSCLC.	Pubmed	0.0007785	1	0.002026	0.02011	1	1	EGFR
Pubmed	17545606	Somatic mutations in the tyrosine kinase domain of epidermal growth factor receptor (EGFR) abrogate EGFR-mediated radioprotection in non-small cell lung carcinoma.	Pubmed	0.0007785	1	0.002026	0.02011	1	1	EGFR
Pubmed	28420725	Monitoring Daily Dynamics of Early Tumor Response to Targeted Therapy by Detecting Circulating Tumor DNA in Urine.	Pubmed	0.0007785	1	0.002026	0.02011	1	1	EGFR
Pubmed	19596084	Longitudinal study of beta2-microglobulin abnormalities in schizophrenia.	Pubmed	0.0007785	1	0.002026	0.02011	1	1	B2M
Pubmed	23683536	Rapid increase of serum neuron specific enolase level and tachyphylaxis of EGFR-tyrosine kinase inhibitor indicate small cell lung cancer transformation from EGFR positive lung adenocarcinoma?	Pubmed	0.0007785	1	0.002026	0.02011	1	1	EGFR
Pubmed	30087386	Reduced post-operative DPP4 activity associated with worse patient outcome after cardiac surgery.	Pubmed	0.0007785	1	0.002026	0.02011	1	1	DPP4
Pubmed	19863329	Identification of epidermal growth factor receptor (EGFR) exon 20 single nucleotide polymorphism in Chinese squamous cell carcinoma of head and neck (SCCHN).	Pubmed	0.0007785	1	0.002026	0.02011	1	1	EGFR
Pubmed	10515878	Beta(2)-microglobulin identified as an apoptosis-inducing factor and its characterization.	Pubmed	0.0007785	1	0.002026	0.02011	1	1	B2M
Pubmed	19518133	Delineating the conformational elements responsible for Cu(2+)-induced oligomerization of beta-2 microglobulin.	Pubmed	0.0007785	1	0.002026	0.02011	1	1	B2M
Pubmed	23754386	Effects of oncogenic mutations on the conformational free-energy landscape of EGFR kinase.	Pubmed	0.0007785	1	0.002026	0.02011	1	1	EGFR
Pubmed	23181982	Epidermal growth factor receptor (EGFR) gene copy number in colorectal adenoma-carcinoma progression.	Pubmed	0.0007785	1	0.002026	0.02011	1	1	EGFR
Pubmed	8625928	Differential expression of the full-length and truncated forms of the epidermal growth factor receptor in the preimplantation mouse uterus and blastocyst.	Pubmed	0.0007785	1	0.002026	0.02011	1	1	EGFR
Pubmed	27076760	Evaluation of therapeutic effectiveness of (131)I-antiEGFR-BSA-PCL in a mouse model of colorectal cancer.	Pubmed	0.0007785	1	0.002026	0.02011	1	1	EGFR
Pubmed	21810691	Clustered genomic alterations in chromosome 7p dictate outcomes and targeted treatment responses of lung adenocarcinoma with EGFR-activating mutations.	Pubmed	0.0007785	1	0.002026	0.02011	1	1	EGFR
Pubmed	21630085	Regulation of chemosensitivity and migration by clusterin in non-small cell lung cancer cells.	Pubmed	0.0007785	1	0.002026	0.02011	1	1	CLU
Pubmed	11739156	Amino-terminal truncation of CXCR3 agonists impairs receptor signaling and lymphocyte chemotaxis, while preserving antiangiogenic properties.	Pubmed	0.0007785	1	0.002026	0.02011	1	1	DPP4
Pubmed	29718750	Moniliform blepharosis in lipoid proteinosis with a homozygous ECM1 gene mutation.	Pubmed	0.0007785	1	0.002026	0.02011	1	1	ECM1
Pubmed	27094943	Calprotectin levels in patients with rheumatoid arthritis to assess and association with exercise treatment.	Pubmed	0.0007785	1	0.002026	0.02011	1	1	S100A9
Pubmed	26474549	Retreatment with anti-EGFR based therapies in metastatic colorectal cancer: impact of intervening time interval and prior anti-EGFR response.	Pubmed	0.0007785	1	0.002026	0.02011	1	1	EGFR
Pubmed	19812540	Protein microarrays identify antibodies to protein kinase Czeta that are associated with a greater risk of allograft loss in pediatric renal transplant recipients.	Pubmed	0.0007785	1	0.002026	0.02011	1	1	PRKCZ
Pubmed	22883988	[Correlation between the efficacy of epidermal growth factor receptor tyrosine kinase inhibitors and EGFR mutations in advanced squamous cell lung cancer].	Pubmed	0.0007785	1	0.002026	0.02011	1	1	EGFR
Pubmed	29447182	The impact of EGFR mutations on the incidence and survival of stages I to III NSCLC patients with subsequent brain metastasis.	Pubmed	0.0007785	1	0.002026	0.02011	1	1	EGFR
Pubmed	28574310	Exosomes as a biomarker platform for detecting epidermal growth factor receptor-positive high-grade gliomas.	Pubmed	0.0007785	1	0.002026	0.02011	1	1	EGFR
Pubmed	28424220	GABABR-Induced EGFR Transactivation Promotes Migration of Human Prostate Cancer Cells.	Pubmed	0.0007785	1	0.002026	0.02011	1	1	EGFR
Pubmed	18765525	Beta2-microglobulin signaling blockade inhibited androgen receptor axis and caused apoptosis in human prostate cancer cells.	Pubmed	0.0007785	1	0.002026	0.02011	1	1	B2M
Pubmed	25925001	A phase II study of pemetrexed monotherapy in chemo-na∩ve Eastern Cooperative Oncology Group performance status 2 patients with EGFR wild-type or unknown advanced non-squamous non-small cell lung cancer (HANSHIN Oncology Group 002).	Pubmed	0.0007785	1	0.002026	0.02011	1	1	EGFR
Pubmed	8939902	Expression of a 74-kDa nuclear factor 1 (NF1) protein is induced in mouse mammary gland involution. Involution-enhanced occupation of a twin NF1 binding element in the testosterone-repressed prostate message-2/clusterin promoter.	Pubmed	0.0007785	1	0.002026	0.02011	1	1	CLU
Pubmed	19912588	Guanylate-binding protein 2 mRNA in peripheral blood leukocytes of liver transplant recipients as a marker for acute cellular rejection.	Pubmed	0.0007785	1	0.002026	0.02011	1	1	GBP2
Pubmed	24262149	Both the cis-trans equilibrium and isomerization dynamics of a single proline amide modulate ?2-microglobulin amyloid assembly.	Pubmed	0.0007785	1	0.002026	0.02011	1	1	B2M
Pubmed	23770713	Cytoplasmic Clusterin expression correlates with pancreatic neuroendocrine tumor size and pathological stage.	Pubmed	0.0007785	1	0.002026	0.02011	1	1	CLU
Pubmed	23986462	EGFRvIII expression in squamous cell carcinoma of the skin.	Pubmed	0.0007785	1	0.002026	0.02011	1	1	EGFR
Pubmed	25590835	Erlotinib plus capecitabine as first-line treatment for older Chinese patients with advanced adenocarcinoma of the lung (C-TONG0807): an open-label, single arm, multicenter phase II study.	Pubmed	0.0007785	1	0.002026	0.02011	1	1	EGFR
Pubmed	28487968	A pilot study identifying a potential plasma biomarker for determining EGFR mutations in exonsá19 or 21 in lung cancer patients.	Pubmed	0.0007785	1	0.002026	0.02011	1	1	EGFR
Pubmed	16445385	The epidermal growth factor receptor (EGFR)-S442F mutant displays increased affinity for neuregulin-2beta and agonist-independent coupling with downstream signalling events.	Pubmed	0.0007785	1	0.002026	0.02011	1	1	EGFR
Pubmed	30007247	Maternal concentrations of human chorionic gonadotropin (hCG) and risk for cerebral palsy (CP) in the child. A case control study.	Pubmed	0.0007785	1	0.002026	0.02011	1	1	CGB3
Pubmed	28428190	Detection of EGFRvIII in Glioblastoma via Perfusion Magnetic Resonance Imaging Signature Consistent with Deep Peritumoral Infiltration: The	Pubmed	0.0007785	1	0.002026	0.02011	1	1	EGFR
Pubmed	20491625	EGFR(s) in aging and carcinogenesis of the gastrointestinal tract.	Pubmed	0.0007785	1	0.002026	0.02011	1	1	EGFR
Pubmed	11796728	Interaction of the extracellular domain of the epidermal growth factor receptor with gangliosides.	Pubmed	0.0007785	1	0.002026	0.02011	1	1	EGFR
Pubmed	25411054	Increased plasma DPP4 activity predicts new-onset hypertension in Chinese over a 4-year period: possible associations with inflammation and oxidative stress.	Pubmed	0.0007785	1	0.002026	0.02011	1	1	DPP4
Pubmed	21960689	Impact of EGFR genetic variants on glioma risk and patient outcome.	Pubmed	0.0007785	1	0.002026	0.02011	1	1	EGFR
Pubmed	22128196	EGFR gene copy number increase in vulvar carcinomas is linked with poor clinical outcome.	Pubmed	0.0007785	1	0.002026	0.02011	1	1	EGFR
Pubmed	21086121	Frequent loss of heterozygosity in the ?2-microglobulin region of chromosome 15 in primary human tumors.	Pubmed	0.0007785	1	0.002026	0.02011	1	1	B2M
Pubmed	17431338	[Prediction of effectiveness of EGFR tyrosine kinase inhibitors for the patients with by EGFR mutations].	Pubmed	0.0007785	1	0.002026	0.02011	1	1	EGFR
Pubmed	9425043	The human epidermal growth factor receptor contains a juxtamembrane calmodulin-binding site.	Pubmed	0.0007785	1	0.002026	0.02011	1	1	EGFR
Pubmed	22426987	Patients with peritoneal mesothelioma lack epidermal growth factor receptor tyrosine kinase mutations that would make them sensitive to tyrosine kinase inhibitors.	Pubmed	0.0007785	1	0.002026	0.02011	1	1	EGFR
Pubmed	24991953	Neuregulin-ERBB signaling in the nervous system and neuropsychiatric diseases.	Pubmed	0.0007785	1	0.002026	0.02011	1	1	EGFR
Pubmed	22321545	[Detection of epidermal growth factor receptor gene mutations and its clinical significance in non-small cell lung cancers].	Pubmed	0.0007785	1	0.002026	0.02011	1	1	EGFR
Pubmed	28376735	Central nervous system progression in advanced non-small cell lung cancer patients with EGFR mutations in response to first-line treatment with two EGFR-TKIs, gefitinib and erlotinib: a comparative study.	Pubmed	0.0007785	1	0.002026	0.02011	1	1	EGFR
Pubmed	27936466	DPP4/CD26 overexpression in urothelial carcinoma confers an independent prognostic impact and correlates with intrinsic biological aggressiveness.	Pubmed	0.0007785	1	0.002026	0.02011	1	1	DPP4
Pubmed	23806066	Dissecting the EGFR-PI3K-AKT pathway in oral cancer highlights the role of the EGFR variant III and its clinical relevance.	Pubmed	0.0007785	1	0.002026	0.02011	1	1	EGFR
Pubmed	29138296	The genetics of PKM? and memory maintenance.	Pubmed	0.0007785	1	0.002026	0.02011	1	1	PRKCZ
Pubmed	7506996	The three-dimensional structure of H-2Db at 2.4 A resolution: implications for antigen-determinant selection.	Pubmed	0.0007785	1	0.002026	0.02011	1	1	B2M
Pubmed	16467848	Neuronal survival depends on EGFR signaling in cortical but not midbrain astrocytes.	Pubmed	0.0007785	1	0.002026	0.02011	1	1	EGFR
Pubmed	22684234	Molecular alterations in epidermal growth factor receptors as potential predictors of invasion in complete hydatidiform moles (CHM).	Pubmed	0.0007785	1	0.002026	0.02011	1	1	EGFR
Pubmed	11983325	Preservation of neurologic function during inflammatory demyelination correlates with axon sparing in a mouse model of multiple sclerosis.	Pubmed	0.0007785	1	0.002026	0.02011	1	1	B2M
Pubmed	22851703	Stress levels of glucocorticoids inhibit LH?-subunit gene expression in gonadotrope cells.	Pubmed	0.0007785	1	0.002026	0.02011	1	1	LHB
Pubmed	17143527	UV light blocks EGFR signalling in human cancer cell lines.	Pubmed	0.0007785	1	0.002026	0.02011	1	1	EGFR
Pubmed	11827542	Rotational dynamics of the epidermal growth factor receptor.	Pubmed	0.0007785	1	0.002026	0.02011	1	1	EGFR
Pubmed	22526156	EGFR L861Q mutation is a frequent feature of pulmonary mucoepidermoid carcinoma.	Pubmed	0.0007785	1	0.002026	0.02011	1	1	EGFR
Pubmed	8181474	Molecular characterization of human TRPM-2/clusterin, a gene associated with sperm maturation, apoptosis and neurodegeneration.	Pubmed	0.0007785	1	0.002026	0.02011	1	1	CLU
Pubmed	24960080	Endothelium-derived nitric oxide (NO) activates the NO-epidermal growth factor receptor-mediated signaling pathway in bradykinin-stimulated angiogenesis.	Pubmed	0.0007785	1	0.002026	0.02011	1	1	EGFR
Pubmed	7508931	Expression of the beta subunit of chorionic gonadotropin in transgenic mice.	Pubmed	0.0007785	1	0.002026	0.02011	1	1	LHB
Pubmed	23377570	EGFR intron-1 CA repeat polymorphism is a predictor of relapse and survival in complete resected only surgically treated esophageal cancer.	Pubmed	0.0007785	1	0.002026	0.02011	1	1	EGFR
Pubmed	24934872	The EGFR demonstrates linear signal transmission.	Pubmed	0.0007785	1	0.002026	0.02011	1	1	EGFR
Pubmed	24197981	EGFR mutation status and its impact on survival of Chinese non-small cell lung cancer patients with brain metastases.	Pubmed	0.0007785	1	0.002026	0.02011	1	1	EGFR
Pubmed	16700508	Expression and function of dipeptidyl peptidase IV and related enzymes in cancer.	Pubmed	0.0007785	1	0.002026	0.02011	1	1	DPP4
Pubmed	7759870	Evidence for lineage commitment and initiation of positive selection by thymocytes with intermediate surface phenotypes.	Pubmed	0.0007785	1	0.002026	0.02011	1	1	B2M
Pubmed	21979953	Bispecific designed ankyrin repeat proteins (DARPins) targeting epidermal growth factor receptor inhibit A431 cell proliferation and receptor recycling.	Pubmed	0.0007785	1	0.002026	0.02011	1	1	EGFR
Pubmed	27020242	Down-regulation of S100A9 inhibits osteosarcoma cell growth through inactivating MAPK and NF-?B signaling pathways.	Pubmed	0.0007785	1	0.002026	0.02011	1	1	S100A9
Pubmed	24496038	SR48692 inhibits non-small cell lung cancer proliferation in an EGF receptor-dependent manner.	Pubmed	0.0007785	1	0.002026	0.02011	1	1	EGFR
Pubmed	20196851	Gene expression profiles of lung adenocarcinoma linked to histopathological grading and survival but not to EGF-R status: a microarray study.	Pubmed	0.0007785	1	0.002026	0.02011	1	1	EGFR
Pubmed	24679070	Secondary structure in the core of amyloid fibrils formed from human ??m and its truncated variant ?N6.	Pubmed	0.0007785	1	0.002026	0.02011	1	1	B2M
Pubmed	19535298	Prostaglandin E1 and misoprostol increase epidermal growth factor production in 3D-cultured human annulus cells.	Pubmed	0.0007785	1	0.002026	0.02011	1	1	EGFR
Pubmed	23886169	Relationship between epidermal growth factor receptor gene mutations and clinicopathological features in patients with non-small cell lung cancer in western Turkey.	Pubmed	0.0007785	1	0.002026	0.02011	1	1	EGFR
Pubmed	27753660	Assessment of EGFR and ERBB2 (HER2) in Gastric and Gastroesophageal Carcinomas: EGFR Amplification is Associated With a Worse Prognosis in Early Stage and Well to Moderately Differentiated Carcinoma.	Pubmed	0.0007785	1	0.002026	0.02011	1	1	EGFR
Pubmed	20198342	Effects of an EGFR-binding affibody molecule on intracellular signaling pathways.	Pubmed	0.0007785	1	0.002026	0.02011	1	1	EGFR
Pubmed	23746767	Epidermal growth factor receptor overexpression is a marker for adverse pathologic features in papillary thyroid carcinoma.	Pubmed	0.0007785	1	0.002026	0.02011	1	1	EGFR
Pubmed	18615853	Genetic variants in protein kinase C zeta gene and type 2 diabetes risk: a case-control study of a Chinese Han population.	Pubmed	0.0007785	1	0.002026	0.02011	1	1	PRKCZ
Pubmed	15175333	Tyrosine 547 constitutes an essential part of the catalytic mechanism of dipeptidyl peptidase IV.	Pubmed	0.0007785	1	0.002026	0.02011	1	1	DPP4
Pubmed	22577117	Increased serum ?2-microglobulin is associated with clinical and immunological markers of disease activity in systemic lupus erythematosus patients.	Pubmed	0.0007785	1	0.002026	0.02011	1	1	B2M
Pubmed	10918300	The EGF receptor: a nexus for trafficking and signaling.	Pubmed	0.0007785	1	0.002026	0.02011	1	1	EGFR
Pubmed	27536083	Upregulated epidermal growth factor receptor expression following near-infrared irradiation simulating solar radiation in a three-dimensional reconstructed human corneal epithelial tissue culture model.	Pubmed	0.0007785	1	0.002026	0.02011	1	1	EGFR
Pubmed	19230975	Functional and structural characterisation of human colostrum free secretory component.	Pubmed	0.0007785	1	0.002026	0.02011	1	1	ECM1
Pubmed	18830231	Identification of a prostate cancer susceptibility gene on chromosome 5p13q12 associated with risk of both familial and sporadic disease.	Pubmed	0.0007785	1	0.002026	0.02011	1	1	ITGA2
Pubmed	6171820	Use of synthetic oligonucleotides as hybridization probes: isolation of cloned cDNA sequences for human beta 2-microglobulin.	Pubmed	0.0007785	1	0.002026	0.02011	1	1	B2M
Pubmed	22693999	Hereditary systemic amyloidosis due to Asp76Asn variant ?2-microglobulin.	Pubmed	0.0007785	1	0.002026	0.02011	1	1	B2M
Pubmed	29363191	Investigation of the binding characteristics between ligands and epidermal growth factor receptor by cell membrane chromatography.	Pubmed	0.0007785	1	0.002026	0.02011	1	1	EGFR
Pubmed	20417648	Role of protein kinase Czeta in thrombin-induced RhoA activation and inter-endothelial gap formation of human dermal microvessel endothelial cell monolayers.	Pubmed	0.0007785	1	0.002026	0.02011	1	1	PRKCZ
Pubmed	17373663	Beta2-microglobulin mutations in microsatellite unstable colorectal tumors.	Pubmed	0.0007785	1	0.002026	0.02011	1	1	B2M
Pubmed	25867325	EGFR gene polymorphisms -216G>T and -191C>A are risk markers for gastric cancer in Mexican population.	Pubmed	0.0007785	1	0.002026	0.02011	1	1	EGFR
Pubmed	25376259	Outsourcing cytological samples to a referral laboratory for EGFR testing in non-small cell lung cancer: does theory meet practice?	Pubmed	0.0007785	1	0.002026	0.02011	1	1	EGFR
Pubmed	30787028	Detection of	Pubmed	0.0007785	1	0.002026	0.02011	1	1	EGFR
Pubmed	11035106	Protein kinase C zeta plays a central role in activation of the p42/44 mitogen-activated protein kinase by endotoxin in alveolar macrophages.	Pubmed	0.0007785	1	0.002026	0.02011	1	1	PRKCZ
Pubmed	8081889	The mouse VLA-2 homologue supports collagen and laminin adhesion but not virus binding.	Pubmed	0.0007785	1	0.002026	0.02011	1	1	ITGA2
Pubmed	23313300	Role of EGFR SNPs in survival of advanced lung adenocarcinoma patients treated with Gefitinib.	Pubmed	0.0007785	1	0.002026	0.02011	1	1	EGFR
Pubmed	25185988	EGF receptor deletion in podocytes attenuates diabetic nephropathy.	Pubmed	0.0007785	1	0.002026	0.02011	1	1	EGFR
Pubmed	24389445	An uncommon insertion mutation in exon 19 of EGFR showed stable disease after TKI treatment.	Pubmed	0.0007785	1	0.002026	0.02011	1	1	EGFR
Pubmed	25523495	C-terminal unfolding of an amyloidogenic ?2-microglobulin fragment: ?N6?2-microglobulin.	Pubmed	0.0007785	1	0.002026	0.02011	1	1	B2M
Pubmed	20558175	Folding and fibrillogenesis: clues from beta2-microglobulin.	Pubmed	0.0007785	1	0.002026	0.02011	1	1	B2M
Pubmed	11981836	CD26 is expressed on a restricted subpopulation of dendritic cells in vivo.	Pubmed	0.0007785	1	0.002026	0.02011	1	1	DPP4
Pubmed	26248464	Impact of epidermal growth factor receptor (EGFR) activating mutations and their targeted treatment in the prognosis of stage IV non-small cell lung cancer (NSCLC) patients harboring liver metastasis.	Pubmed	0.0007785	1	0.002026	0.02011	1	1	EGFR
Pubmed	27046167	Micropapillary: A component more likely to harbour heterogeneous EGFR mutations in lung adenocarcinomas.	Pubmed	0.0007785	1	0.002026	0.02011	1	1	EGFR
Pubmed	22815900	Loss of activating EGFR mutant gene contributes to acquired resistance to EGFR tyrosine kinase inhibitors in lung cancer cells.	Pubmed	0.0007785	1	0.002026	0.02011	1	1	EGFR
Pubmed	22610259	EGFR array: uses in the detection of plasma EGFR mutations in non-small cell lung cancer patients.	Pubmed	0.0007785	1	0.002026	0.02011	1	1	EGFR
Pubmed	23803047	Differences in epidermal growth factor receptor gene mutations and relationship with clinicopathological features in NSCLC between Uygur and Han ethnic groups.	Pubmed	0.0007785	1	0.002026	0.02011	1	1	EGFR
Pubmed	9389768	Expression of epidermal growth factor receptor in fetal mouse submandibular gland detected by a biotinyltyramide-based catalyzed signal amplification method.	Pubmed	0.0007785	1	0.002026	0.02011	1	1	EGFR
Pubmed	20685225	ErbB receptor signaling in astrocytes: a mediator of neuron-glia communication in the mature central nervous system.	Pubmed	0.0007785	1	0.002026	0.02011	1	1	EGFR
Pubmed	17092854	Polymorphism of egfr Intron1 is associated with susceptibility and severity of asthma.	Pubmed	0.0007785	1	0.002026	0.02011	1	1	EGFR
Pubmed	16552419	Mutations within the tyrosine kinase domain of EGFR gene specifically occur in lung adenocarcinoma patients with a low exposure of tobacco smoking.	Pubmed	0.0007785	1	0.002026	0.02011	1	1	EGFR
Pubmed	14500633	In vivo treatment of class II MHC-deficient mice with anti-TCR antibody restores the generation of circulating CD4 T cells and optimal architecture of thymic medulla.	Pubmed	0.0007785	1	0.002026	0.02011	1	1	B2M
Pubmed	22274961	The role of clusterin in Alzheimer's disease: pathways, pathogenesis, and therapy.	Pubmed	0.0007785	1	0.002026	0.02011	1	1	CLU
Pubmed	20621735	Epidermal growth factor receptor polymorphisms and risk for toxicity in paediatric patients treated with gefitinib.	Pubmed	0.0007785	1	0.002026	0.02011	1	1	EGFR
Pubmed	25531554	Epidermal growth factor receptor inhibitor protects against abdominal aortic aneurysm in a mouse model.	Pubmed	0.0007785	1	0.002026	0.02011	1	1	EGFR
Pubmed	25574066	Serum clusterin as a tumor marker and prognostic factor for patients with esophageal cancer.	Pubmed	0.0007785	1	0.002026	0.02011	1	1	CLU
Pubmed	26093903	Perspectives on Epidermal Growth Factor Receptor Regulation in Triple-Negative Breast Cancer: Ligand-Mediated Mechanisms of Receptor Regulation and Potential for Clinical Targeting.	Pubmed	0.0007785	1	0.002026	0.02011	1	1	EGFR
Pubmed	16601119	Collagen plays an active role in the aggregation of beta2-microglobulin under physiopathological conditions of dialysis-related amyloidosis.	Pubmed	0.0007785	1	0.002026	0.02011	1	1	B2M
Pubmed	28902797	Polymorphism in DPPIV Gene in Acute Pancreatitis.	Pubmed	0.0007785	1	0.002026	0.02011	1	1	DPP4
Pubmed	19122197	Calprotectin S100A9 calcium-binding loops I and II are essential for keratinocyte resistance to bacterial invasion.	Pubmed	0.0007785	1	0.002026	0.02011	1	1	S100A9
Pubmed	23234355	Combined use of anti-ErbB monoclonal antibodies and erlotinib enhances antibody-dependent cellular cytotoxicity of wild-type erlotinib-sensitive NSCLC cell lines.	Pubmed	0.0007785	1	0.002026	0.02011	1	1	EGFR
Pubmed	24682604	Features and prognostic impact of distant metastasis in patients with stage IV lung adenocarcinoma harboring EGFR mutations: importance of bone metastasis.	Pubmed	0.0007785	1	0.002026	0.02011	1	1	EGFR
Pubmed	21892414	Alzheimer's risk variants in the clusterin gene are associated with alternative splicing.	Pubmed	0.0007785	1	0.002026	0.02011	1	1	CLU
Pubmed	20654692	Does hCG or hCG? play a role in cancer cell biology?	Pubmed	0.0007785	1	0.002026	0.02011	1	1	CGB3
Pubmed	15735700	Signalling pathways leading to neuroblastoma differentiation after serum withdrawal: HDL blocks neuroblastoma differentiation by inhibition of EGFR.	Pubmed	0.0007785	1	0.002026	0.02011	1	1	EGFR
Pubmed	19772171	Correlation of epidermal growth factor receptor mutation, immunohistochemistry, and fluorescence in situ hybridization in esophageal squamous cell carcinoma.	Pubmed	0.0007785	1	0.002026	0.02011	1	1	EGFR
Pubmed	30173455	[Correlation of the single nucleotide polymorphisms rs34349826 and rs6521 of the LHB gene with male infertility in Chinese men].	Pubmed	0.0007785	1	0.002026	0.02011	1	1	LHB
Pubmed	26339441	EGFR mutation L747P led to gefitinib resistance and accelerated liver metastases in a Chinese patient with lung adenocarcinoma.	Pubmed	0.0007785	1	0.002026	0.02011	1	1	EGFR
Pubmed	20237940	Dose effect of cigarette smoking on frequency and spectrum of epidermal growth factor receptor gene mutations in Korean patients with non-small cell lung cancer.	Pubmed	0.0007785	1	0.002026	0.02011	1	1	EGFR
Pubmed	24968315	Increased plasma DPP4 activities predict new-onset atherosclerosis in association with its proinflammatory effects in Chinese over a four year period: A prospective study.	Pubmed	0.0007785	1	0.002026	0.02011	1	1	DPP4
Pubmed	18801425	Beta2-microglobulin abnormalities in antipsychotic-na∩ve schizophrenia: evidence for immune pathogenesis.	Pubmed	0.0007785	1	0.002026	0.02011	1	1	B2M
Pubmed	24922195	Elevated serum levels of calprotectin (myeloid-related protein 8/14) in patients with ankylosing spondylitis and its association with disease activity and quality of life.	Pubmed	0.0007785	1	0.002026	0.02011	1	1	S100A9
Pubmed	21132006	Characterization of epidermal growth factor receptor mutations in non-small-cell lung cancer patients of African-American ancestry.	Pubmed	0.0007785	1	0.002026	0.02011	1	1	EGFR
Pubmed	26063798	Supersaturation-limited and Unlimited Phase Transitions Compete to Produce the Pathway Complexity in Amyloid Fibrillation.	Pubmed	0.0007785	1	0.002026	0.02011	1	1	B2M
Pubmed	12471623	Beta2-microglobulin aberrations in diffuse large B-cell lymphoma of the testis and the central nervous system.	Pubmed	0.0007785	1	0.002026	0.02011	1	1	B2M
Pubmed	22321547	[Relationship of epidermal growth factor receptor gene mutations, clinicopathologic features and prognosis in patients with non-small cell lung cancer].	Pubmed	0.0007785	1	0.002026	0.02011	1	1	EGFR
Pubmed	30053814	Lower serum clusterin levels in patients with erosive hand osteoarthritis are associated with more pain.	Pubmed	0.0007785	1	0.002026	0.02011	1	1	CLU
Pubmed	26016774	The Soluble Heparin-Binding EGF-Like Growth Factor Stimulates EGF Receptor Trafficking to the Nucleus.	Pubmed	0.0007785	1	0.002026	0.02011	1	1	EGFR
Pubmed	9205141	Impaired lung branching morphogenesis in the absence of functional EGF receptor.	Pubmed	0.0007785	1	0.002026	0.02011	1	1	EGFR
Pubmed	17686547	EGFR exon 20 insertion mutation in Japanese lung cancer.	Pubmed	0.0007785	1	0.002026	0.02011	1	1	EGFR
Pubmed	28026806	[Determination of EGFR gene somatic mutations in tissues and plasma of patients with advanced non-small cell lung cancer].	Pubmed	0.0007785	1	0.002026	0.02011	1	1	EGFR
Pubmed	17597618	Clusterin is associated with spontaneous breast cancer in TA2 mice.	Pubmed	0.0007785	1	0.002026	0.02011	1	1	CLU
Pubmed	25338166	The pro-apoptotic and pro-inflammatory effects of calprotectin on human periodontal ligament cells.	Pubmed	0.0007785	1	0.002026	0.02011	1	1	S100A9
Pubmed	18372921	EGFR somatic doublets in lung cancer are frequent and generally arise from a pair of driver mutations uncommonly seen as singlet mutations: one-third of doublets occur at five pairs of amino acids.	Pubmed	0.0007785	1	0.002026	0.02011	1	1	EGFR
Pubmed	12488093	Amyloid-forming peptides from beta2-microglobulin-Insights into the mechanism of fibril formation in vitro.	Pubmed	0.0007785	1	0.002026	0.02011	1	1	B2M
Pubmed	20595818	EGFR expression variance in paired colorectal cancer primary and metastatic tumors.	Pubmed	0.0007785	1	0.002026	0.02011	1	1	EGFR
Pubmed	7664795	Control of thymus-independent intestinal intraepithelial lymphocytes by beta 2-microglobulin.	Pubmed	0.0007785	1	0.002026	0.02011	1	1	B2M
Pubmed	27899813	The pro-fibrotic role of dipeptidyl peptidase 4 in carbon tetrachloride-induced experimental liver injury.	Pubmed	0.0007785	1	0.002026	0.02011	1	1	DPP4
Pubmed	25775354	Downregulation of beta-microglobulin to diminish T-lymphocyte lysis of non-syngeneic cell sources of engineered heart tissue constructs.	Pubmed	0.0007785	1	0.002026	0.02011	1	1	B2M
Pubmed	22647452	Higher clusterin immunolabeling and sperm DNA damage levels in hypertensive men compared with controls.	Pubmed	0.0007785	1	0.002026	0.02011	1	1	CLU
Pubmed	24283698	Epidermal growth factor receptor (EGFR) contributes to fetal lung fibroblast injury induced by mechanical stretch.	Pubmed	0.0007785	1	0.002026	0.02011	1	1	EGFR
Pubmed	19224573	Mevastatin-induced neurite outgrowth of neuroblastoma cells via activation of EGFR.	Pubmed	0.0007785	1	0.002026	0.02011	1	1	EGFR
Pubmed	21681119	Epidermal growth factor receptor mutations are associated with docetaxel sensitivity in lung cancer.	Pubmed	0.0007785	1	0.002026	0.02011	1	1	EGFR
Pubmed	28427238	Clinical features and treatment outcome of non-small cell lung cancer (NSCLC) patients with uncommon or complex epidermal growth factor receptor (EGFR) mutations.	Pubmed	0.0007785	1	0.002026	0.02011	1	1	EGFR
Pubmed	24551297	EGFR protein expression and gene amplification in squamous intraepithelial lesions and squamous cell carcinomas of the cervix.	Pubmed	0.0007785	1	0.002026	0.02011	1	1	EGFR
Pubmed	15580296	RNA interference against a glioma-derived allele of EGFR induces blockade at G2M.	Pubmed	0.0007785	1	0.002026	0.02011	1	1	EGFR
Pubmed	12483204	Crystal structure of human dipeptidyl peptidase IV/CD26 in complex with a substrate analog.	Pubmed	0.0007785	1	0.002026	0.02011	1	1	DPP4
Pubmed	27371673	Association of Plasma DPP4 Activity With Mild Cognitive Impairment in Elderly Patients With Type 2 Diabetes: Results From the GDMD Study in China.	Pubmed	0.0007785	1	0.002026	0.02011	1	1	DPP4
Pubmed	25702838	?2-Microglobulin deficiency causes a complex immunodeficiency of the innate and adaptive immune system.	Pubmed	0.0007785	1	0.002026	0.02011	1	1	B2M
Pubmed	8979264	Identification of seven novel mutations in LH beta-subunit gene by SSCP.	Pubmed	0.0007785	1	0.002026	0.02011	1	1	LHB
Pubmed	28626027	Selective activation of epidermal growth factor receptor in renal proximal tubule induces tubulointerstitial fibrosis.	Pubmed	0.0007785	1	0.002026	0.02011	1	1	EGFR
Pubmed	9014824	Increased clearance of IgG in mice that lack beta 2-microglobulin: possible protective role of FcRn.	Pubmed	0.0007785	1	0.002026	0.02011	1	1	B2M
Pubmed	25043903	EGFR mutations and clinical outcomes of chemotherapy for advanced non-small cell lung cancer: a meta-analysis.	Pubmed	0.0007785	1	0.002026	0.02011	1	1	EGFR
Pubmed	12752434	Different modes of dipeptidyl peptidase IV (CD26) inhibition by oligopeptides derived from the N-terminus of HIV-1 Tat indicate at least two inhibitor binding sites.	Pubmed	0.0007785	1	0.002026	0.02011	1	1	DPP4
Pubmed	19890021	The common genetic variant of luteinizing hormone has a longer serum half-life than the wild type in heterozygous women.	Pubmed	0.0007785	1	0.002026	0.02011	1	1	LHB
Pubmed	25659577	EGFRvIII-mediated transactivation of receptor tyrosine kinases in glioma: mechanism and therapeutic implications.	Pubmed	0.0007785	1	0.002026	0.02011	1	1	EGFR
Pubmed	28954786	A Phase I, Dose Escalation Study of Oral ASP8273 in Patients with Non-small Cell Lung Cancers with Epidermal Growth Factor Receptor Mutations.	Pubmed	0.0007785	1	0.002026	0.02011	1	1	EGFR
Pubmed	23407558	Local therapy with continued EGFR tyrosine kinase inhibitor therapy as a treatment strategy in EGFR-mutant advanced lung cancers that have developed acquired resistance to EGFR tyrosine kinase inhibitors.	Pubmed	0.0007785	1	0.002026	0.02011	1	1	EGFR
Pubmed	12911560	Glycosaminoglycan and proteoglycan inhibit the depolymerization of beta2-microglobulin amyloid fibrils in vitro.	Pubmed	0.0007785	1	0.002026	0.02011	1	1	B2M
Pubmed	17643426	Hepatocyte growth factor induces epithelial cell motility through transactivation of the epidermal growth factor receptor.	Pubmed	0.0007785	1	0.002026	0.02011	1	1	EGFR
Pubmed	17713473	Germline polymorphisms in EGFR and survival in patients with lung cancer receiving gefitinib.	Pubmed	0.0007785	1	0.002026	0.02011	1	1	EGFR
Pubmed	21518597	Comparison of three methods for detecting epidermal growth factor receptor mutations in plasma DNA samples of Chinese patients with advanced non-small cell lung cancer.	Pubmed	0.0007785	1	0.002026	0.02011	1	1	EGFR
Pubmed	3138233	Epidermal growth factor receptor threonine and serine residues phosphorylated in vivo.	Pubmed	0.0007785	1	0.002026	0.02011	1	1	EGFR
Pubmed	17881501	EGF receptor signalling is essential for electric-field-directed migration of breast cancer cells.	Pubmed	0.0007785	1	0.002026	0.02011	1	1	EGFR
Pubmed	26134877	807C/T polymorphism of platelet glycoprotein Ia gene is associated with cerebral hemorrhage in a Chinese population.	Pubmed	0.0007785	1	0.002026	0.02011	1	1	ITGA2
Pubmed	29902248	Exacerbation of hepatic injury during rodent malaria by myeloid-related protein 14.	Pubmed	0.0007785	1	0.002026	0.02011	1	1	S100A9
Pubmed	24513691	Prospective study of EGFR intron 1 (CA)n repeats variants as predictors of benefit from cetuximab and irinotecan in chemo-refractory metastatic colorectal cancer (mCRC) patients.	Pubmed	0.0007785	1	0.002026	0.02011	1	1	EGFR
Pubmed	17390112	Global profiling of EGFR gene mutation, amplification, regulation and tissue protein expression in unknown primary carcinomas: to target or not to target?	Pubmed	0.0007785	1	0.002026	0.02011	1	1	EGFR
Pubmed	27933650	Up-Regulation of MicroRNA-133a Inhibits the MEK/ERK Signaling Pathway to Promote Cell Apoptosis and Enhance Radio-Sensitivity by Targeting EGFR in Esophageal Cancer In Vivo and In Vitro.	Pubmed	0.0007785	1	0.002026	0.02011	1	1	EGFR
Pubmed	2601725	A serum protein SP40,40 modulates the formation of membrane attack complex of complement on erythrocytes.	Pubmed	0.0007785	1	0.002026	0.02011	1	1	CLU
Pubmed	15050893	PHOSPHO1-A novel phosphatase specifically expressed at sites of mineralisation in bone and cartilage.	Pubmed	0.0007785	1	0.002026	0.02011	1	1	PHOSPHO1
Pubmed	22871376	EGFR mutations and mucoepidermoid carcinoma: putative significance in differing populations.	Pubmed	0.0007785	1	0.002026	0.02011	1	1	EGFR
Pubmed	25969993	Using the MCF10A/MCF10CA1a Breast Cancer Progression Cell Line Model to Investigate the Effect of Active, Mutant Forms of EGFR in Breast Cancer Development and Treatment Using Gefitinib.	Pubmed	0.0007785	1	0.002026	0.02011	1	1	EGFR
Pubmed	17375033	Epidermal growth factor receptor polymorphisms and clinical outcomes in non-small-cell lung cancer patients treated with gefitinib.	Pubmed	0.0007785	1	0.002026	0.02011	1	1	EGFR
Pubmed	23208459	Epigenetic and immunohistochemical characterization of the Clusterin gene in ovarian tumors.	Pubmed	0.0007785	1	0.002026	0.02011	1	1	CLU
Pubmed	11967566	Structural properties of an amyloid precursor of beta(2)-microglobulin.	Pubmed	0.0007785	1	0.002026	0.02011	1	1	B2M
Pubmed	23255615	EGFR activity is required for renal tubular cell dedifferentiation and proliferation in a murine model of folic acid-induced acute kidney injury.	Pubmed	0.0007785	1	0.002026	0.02011	1	1	EGFR
Pubmed	17524613	Exercise-induced liver beta2-microglobulin expression is related to lower IgG clearance in the blood.	Pubmed	0.0007785	1	0.002026	0.02011	1	1	B2M
Pubmed	30429037	Three new disease-progression modes in NSCLC patients after EGFR-TKI treatment by next-generation sequencing analysis.	Pubmed	0.0007785	1	0.002026	0.02011	1	1	EGFR
Pubmed	16318625	Computational modeling reveals molecular details of epidermal growth factor binding.	Pubmed	0.0007785	1	0.002026	0.02011	1	1	EGFR
Pubmed	25667306	Immature myeloid cells directly contribute to skin tumor development by recruiting IL-17-producing CD4+ T cells.	Pubmed	0.0007785	1	0.002026	0.02011	1	1	S100A9
Pubmed	26544543	Chromogenic Assay for Lung Cancer-Related EGFR Exon 19 Hotspot Deletion Mutations.	Pubmed	0.0007785	1	0.002026	0.02011	1	1	EGFR
Pubmed	28244453	Epidermal growth factor receptor expression in gastric tumors and its relationship with the germline polymorphisms - 216 G>T, -191 C>A, (CA) n IVS1, and R521K.	Pubmed	0.0007785	1	0.002026	0.02011	1	1	EGFR
Pubmed	18694561	Clathrin-mediated internalization is essential for sustained EGFR signaling but dispensable for degradation.	Pubmed	0.0007785	1	0.002026	0.02011	1	1	EGFR
Pubmed	19372140	EGFR pathway polymorphisms and bladder cancer susceptibility and prognosis.	Pubmed	0.0007785	1	0.002026	0.02011	1	1	EGFR
Pubmed	25464035	Distinct promoters, subjected to epigenetic regulation, drive the expression of two clusterin mRNAs in prostate cancer cells.	Pubmed	0.0007785	1	0.002026	0.02011	1	1	CLU
Pubmed	25658924	Challenges in EGFRvIII detection in head and neck squamous cell carcinoma.	Pubmed	0.0007785	1	0.002026	0.02011	1	1	EGFR
Pubmed	27625045	Dipeptidyl peptidase-4 activity is associated with urine albumin excretion in type 1 diabetes.	Pubmed	0.0007785	1	0.002026	0.02011	1	1	DPP4
Pubmed	22908963	Serum activity of DPPIV and its expression on lymphocytes in patients with melanoma and in people with vitiligo.	Pubmed	0.0007785	1	0.002026	0.02011	1	1	DPP4
Pubmed	21729655	EGFR mutation status in primary lung adenocarcinomas and corresponding metastatic lesions: discordance in pleural metastases.	Pubmed	0.0007785	1	0.002026	0.02011	1	1	EGFR
Pubmed	25971960	Receptor Tyrosine Kinase Expression Predicts Response to Sunitinib in Breast Cancer.	Pubmed	0.0007785	1	0.002026	0.02011	1	1	EGFR
Pubmed	24919575	Tyrosine phosphoproteomics identifies both codrivers and cotargeting strategies for T790M-related EGFR-TKI resistance in non-small cell lung cancer.	Pubmed	0.0007785	1	0.002026	0.02011	1	1	EGFR
Pubmed	24014031	Structure, folding dynamics, and amyloidogenesis of D76N ?2-microglobulin: roles of shear flow, hydrophobic surfaces, and ?-crystallin.	Pubmed	0.0007785	1	0.002026	0.02011	1	1	B2M
Pubmed	21067269	The different clinical significance of EGFR mutations in exon 19 and 21 in non-small cell lung cancer patients of China.	Pubmed	0.0007785	1	0.002026	0.02011	1	1	EGFR
Pubmed	18429954	Soy consumption reduces the risk of non-small-cell lung cancers with epidermal growth factor receptor mutations among Japanese.	Pubmed	0.0007785	1	0.002026	0.02011	1	1	EGFR
Pubmed	16793002	Phosphorylation of Thr654 but not Thr669 within the juxtamembrane domain of the EGF receptor inhibits calmodulin binding.	Pubmed	0.0007785	1	0.002026	0.02011	1	1	EGFR
Pubmed	19133013	Enhanced phosphorylation of the epidermal growth factor receptor at the site of tyrosine 992 in esophageal carcinomas.	Pubmed	0.0007785	1	0.002026	0.02011	1	1	EGFR
Pubmed	22116317	Second-line epidermal growth factor receptor inhibitors followed by third-line pemetrexed or the reverse sequence: a retrospective analysis of 83 Chinese patients with advanced lung adenocarcinoma.	Pubmed	0.0007785	1	0.002026	0.02011	1	1	EGFR
Pubmed	27993995	In neonates S100A8/S100A9 alarmins prevent the expansion of a specific inflammatory monocyte population promoting septic shock.	Pubmed	0.0007785	1	0.002026	0.02011	1	1	S100A9
Pubmed	28453784	Detection of wild-type EGFR amplification and EGFRvIII mutation in CSF-derived extracellular vesicles of glioblastoma patients.	Pubmed	0.0007785	1	0.002026	0.02011	1	1	EGFR
Pubmed	23239743	EGFR polymorphisms, hormone replacement therapy and lung adenocarcinoma risk: analysis from a genome-wide association study in never-smoking women.	Pubmed	0.0007785	1	0.002026	0.02011	1	1	EGFR
Pubmed	26887852	Epidermal Growth Factor Receptor Mutation Status and Treatment Outcome for R0-Resected Patients with Stage 3 Non-small Cell Lung Cancer.	Pubmed	0.0007785	1	0.002026	0.02011	1	1	EGFR
Pubmed	20156290	Epidermal growth factor receptor gene numerical aberrations are frequent events in actinic keratoses and invasive cutaneous squamous cell carcinomas.	Pubmed	0.0007785	1	0.002026	0.02011	1	1	EGFR
Pubmed	21604158	[Histology-based algorithm in the molecular diagnosis of mutations of the Epidernal Growth Factor Receptor (EGFR) in non-small cell lung cancer].	Pubmed	0.0007785	1	0.002026	0.02011	1	1	EGFR
Pubmed	15710947	Predictive and prognostic impact of epidermal growth factor receptor mutation in non-small-cell lung cancer patients treated with gefitinib.	Pubmed	0.0007785	1	0.002026	0.02011	1	1	EGFR
Pubmed	18307528	Role of epidermal growth factor receptor in maintaining airway goblet cell hyperplasia in rats sensitized to allergen.	Pubmed	0.0007785	1	0.002026	0.02011	1	1	EGFR
Pubmed	18644433	EGFR activation confers protections against UV-induced apoptosis in cultured mouse skin dendritic cells.	Pubmed	0.0007785	1	0.002026	0.02011	1	1	EGFR
Pubmed	28485054	EGFR gene mutation in gastrointestinal stromal tumours.	Pubmed	0.0007785	1	0.002026	0.02011	1	1	EGFR
Pubmed	28329143	Epidermal growth factor receptor mutations are linked to skip N2 lymph node metastasis in resected non-small-cell lung cancer adenocarcinomas.	Pubmed	0.0007785	1	0.002026	0.02011	1	1	EGFR
Pubmed	17618276	A functional role for EGFR signaling in myelination and remyelination.	Pubmed	0.0007785	1	0.002026	0.02011	1	1	EGFR
Pubmed	23007009	Epidermal growth factor receptor: a re-emerging target in glioblastoma.	Pubmed	0.0007785	1	0.002026	0.02011	1	1	EGFR
Pubmed	12778464	Selective absence of CD8+ TCRalpha beta+ intestinal epithelial cells in transgenic mice expressing beta2-microglobulin-associated ligands exclusively on thymic cortical epithelium.	Pubmed	0.0007785	1	0.002026	0.02011	1	1	B2M
Pubmed	29292708	Epidermal growth factor receptor T790M testing in progressed lung cancer: A review of sensitive methods for analysis of tissue and liquid biopsy samples.	Pubmed	0.0007785	1	0.002026	0.02011	1	1	EGFR
Pubmed	20103766	Induction of neutrophil degranulation by S100A9 via a MAPK-dependent mechanism.	Pubmed	0.0007785	1	0.002026	0.02011	1	1	S100A9
Pubmed	27472739	18F-FDG uptake for prediction EGFR mutation status in non-small cell lung cancer.	Pubmed	0.0007785	1	0.002026	0.02011	1	1	EGFR
Pubmed	15494003	Active and inactive conformations of the epidermal growth factor receptor.	Pubmed	0.0007785	1	0.002026	0.02011	1	1	EGFR
Pubmed	19371962	18F-FDG uptake and EGFR mutations in patients with non-small cell lung cancer: a single-institution retrospective analysis.	Pubmed	0.0007785	1	0.002026	0.02011	1	1	EGFR
Pubmed	28758931	Tumor-Stroma Crosstalk in Bone Tissue: The Osteoclastogenic Potential of a Breast Cancer Cell Line in a Co-Culture System and the Role of EGFR Inhibition.	Pubmed	0.0007785	1	0.002026	0.02011	1	1	EGFR
Pubmed	25247952	Tumor load in patients with multiple myeloma: ?2-microglobulin levels versus whole-body MRI.	Pubmed	0.0007785	1	0.002026	0.02011	1	1	B2M
Pubmed	25953829	Postprandial incretin and islet hormone responses and dipeptidyl-peptidase 4 enzymatic activity in patients with maturity onset diabetes of the young.	Pubmed	0.0007785	1	0.002026	0.02011	1	1	DPP4
Pubmed	22795969	Alzheimer risk variant CLU and brain function during aging.	Pubmed	0.0007785	1	0.002026	0.02011	1	1	CLU
Pubmed	16919295	Structure of interacting segments in the growing amyloid fibril of beta2-microglobulin probed with IR spectroscopy.	Pubmed	0.0007785	1	0.002026	0.02011	1	1	B2M
Pubmed	24128654	Effect of salmon consumption during pregnancy on maternal and infant faecal microbiota, secretory IgA and calprotectin.	Pubmed	0.0007785	1	0.002026	0.02011	1	1	S100A9
Pubmed	11929856	Lipoid proteinosis maps to 1q21 and is caused by mutations in the extracellular matrix protein 1 gene (ECM1).	Pubmed	0.0007785	1	0.002026	0.02011	1	1	ECM1
Pubmed	25000176	Microenvironmental stiffness enhances glioma cell proliferation by stimulating epidermal growth factor receptor signaling.	Pubmed	0.0007785	1	0.002026	0.02011	1	1	EGFR
Pubmed	19201988	Pivotal Advance: PKCzeta is required for migration of macrophages.	Pubmed	0.0007785	1	0.002026	0.02011	1	1	PRKCZ
Pubmed	25907296	S100A9 promotes human hepatocellular carcinoma cell growth and invasion through RAGE-mediated ERK1/2 and p38 MAPK pathways.	Pubmed	0.0007785	1	0.002026	0.02011	1	1	S100A9
Pubmed	29878144	The prognostic effect of the epidermal growth factor receptor gene mutation on recurrence dynamics of lung adenocarcinoma.	Pubmed	0.0007785	1	0.002026	0.02011	1	1	EGFR
Pubmed	15864535	Hyperglycaemia increases dipeptidyl peptidase IV activity in diabetes mellitus.	Pubmed	0.0007785	1	0.002026	0.02011	1	1	DPP4
Pubmed	7533293	A mutation in the epidermal growth factor receptor in waved-2 mice has a profound effect on receptor biochemistry that results in impaired lactation.	Pubmed	0.0007785	1	0.002026	0.02011	1	1	EGFR
Pubmed	17157856	Role of glycoprotein Ia gene polymorphisms in determining platelet function in myocardial infarction patients undergoing percutaneous coronary intervention on dual antiplatelet treatment.	Pubmed	0.0007785	1	0.002026	0.02011	1	1	ITGA2
Pubmed	27473086	Total and mutated EGFR quantification in cell-free DNA from non-small cell lung cancer patients detects tumor heterogeneity and presents prognostic value.	Pubmed	0.0007785	1	0.002026	0.02011	1	1	EGFR
Pubmed	24413989	Expression line approach to recombinant human epidermal growth factor into the yeast, Pichia pastoris from Huh-7 cell line.	Pubmed	0.0007785	1	0.002026	0.02011	1	1	EGFR
Pubmed	8941378	Assignment of the ERM gene (ETV5) coding for the ets-related protein to human chromosome band 3q28 by in situ hybridization.	Pubmed	0.0007785	1	0.002026	0.02011	1	1	ETV5
Pubmed	22108961	Association between mutations of the luteinizing hormone ? subunit and female infertility.	Pubmed	0.0007785	1	0.002026	0.02011	1	1	LHB
Pubmed	26554801	The Difference of Clinical Characteristics Between Patients With Exon 19 Deletion and Those With L858R Mutation in Nonsmall Cell Lung Cancer.	Pubmed	0.0007785	1	0.002026	0.02011	1	1	EGFR
Pubmed	28351317	Impact of epidermal growth factor receptor gene expression level on clinical outcomes in epidermal growth factor receptor mutant lung adenocarcinoma patients taking first-line epidermal growth factor receptor-tyrosine kinase inhibitors.	Pubmed	0.0007785	1	0.002026	0.02011	1	1	EGFR
Pubmed	17056579	Characterization and functional consequences of underexpression of clusterin in rheumatoid arthritis.	Pubmed	0.0007785	1	0.002026	0.02011	1	1	CLU
Pubmed	22232519	In situ analysis of mutant EGFRs prevalent in glioblastoma multiforme reveals aberrant dimerization, activation, and differential response to anti-EGFR targeted therapy.	Pubmed	0.0007785	1	0.002026	0.02011	1	1	EGFR
Pubmed	25039274	Efficacy and safety of combined radiotherapy with EGFR inhibitors and chemotherapy for laryngeal organ preservation in patients with locally advanced hypopharyngeal carcinomas.	Pubmed	0.0007785	1	0.002026	0.02011	1	1	EGFR
Pubmed	24033722	Lower gefitinib dose led to earlier resistance acquisition before emergence of T790M mutation in epidermal growth factor receptor-mutated lung cancer model.	Pubmed	0.0007785	1	0.002026	0.02011	1	1	EGFR
Pubmed	22266854	ETV5 cooperates with LPP as a sensor of extracellular signals and promotes EMT in endometrial carcinomas.	Pubmed	0.0007785	1	0.002026	0.02011	1	1	ETV5
Pubmed	28006816	EGFR mutation detection in circulating cell-free DNA of lung adenocarcinoma patients: analysis of LUX-Lung 3 and 6.	Pubmed	0.0007785	1	0.002026	0.02011	1	1	EGFR
Pubmed	24685306	T790M mutation is associated with better efficacy of treatment beyond progression with EGFR-TKI in advanced NSCLC patients.	Pubmed	0.0007785	1	0.002026	0.02011	1	1	EGFR
Pubmed	20028983	Native-unlike long-lived intermediates along the folding pathway of the amyloidogenic protein beta2-microglobulin revealed by real-time two-dimensional NMR.	Pubmed	0.0007785	1	0.002026	0.02011	1	1	B2M
Pubmed	27133758	EGFR mutation status on brain metastases from non-small cell lung cancer.	Pubmed	0.0007785	1	0.002026	0.02011	1	1	EGFR
Pubmed	25858318	EGFR-independent autophagy induction with gefitinib and enhancement of its cytotoxic effect by targeting autophagy with clarithromycin in non-small cell lung cancer cells.	Pubmed	0.0007785	1	0.002026	0.02011	1	1	EGFR
Pubmed	29255092	Ligand-activated epidermal growth factor receptor (EGFR) signaling governs endocytic trafficking of unliganded receptor monomers by non-canonical phosphorylation.	Pubmed	0.0007785	1	0.002026	0.02011	1	1	EGFR
Pubmed	20579378	EGFR isoforms and gene regulation in human endometrial cancer cells.	Pubmed	0.0007785	1	0.002026	0.02011	1	1	EGFR
Pubmed	12145324	Clusterin promotes amyloid plaque formation and is critical for neuritic toxicity in a mouse model of Alzheimer's disease.	Pubmed	0.0007785	1	0.002026	0.02011	1	1	CLU
Pubmed	27999105	Hepatic DPP4 DNA Methylation Associates With Fatty Liver.	Pubmed	0.0007785	1	0.002026	0.02011	1	1	DPP4
Pubmed	16467085	A rapid and sensitive enzymatic method for epidermal growth factor receptor mutation screening.	Pubmed	0.0007785	1	0.002026	0.02011	1	1	EGFR
Pubmed	15205592	807 C/T Polymorphism of the glycoprotein Ia gene and pharmacogenetic modulation of platelet response to dual antiplatelet treatment.	Pubmed	0.0007785	1	0.002026	0.02011	1	1	ITGA2
Pubmed	20596023	The male mouse pheromone ESP1 enhances female sexual receptive behaviour through a specific vomeronasal receptor.	Pubmed	0.0007785	1	0.002026	0.02011	1	1	B2M
Pubmed	17616711	The inhibitory effect of (-)-epigallocatechin gallate on activation of the epidermal growth factor receptor is associated with altered lipid order in HT29 colon cancer cells.	Pubmed	0.0007785	1	0.002026	0.02011	1	1	EGFR
Pubmed	19484958	[Effects of theaflavins on the signal transduction pathway of epidermal growth factor receptor in airway mucous hypersecretion].	Pubmed	0.0007785	1	0.002026	0.02011	1	1	EGFR
Pubmed	24198203	microRNA expression profiles associated with survival, disease progression, and response to gefitinib in completely resected non-small-cell lung cancer with EGFR mutation.	Pubmed	0.0007785	1	0.002026	0.02011	1	1	EGFR
Pubmed	25250762	Novel mutation in TSPAN12 leads to autosomal recessive inheritance of congenital vitreoretinal disease with intra-familial phenotypic variability.	Pubmed	0.0007785	1	0.002026	0.02011	1	1	TSPAN12
Pubmed	28039712	EGFR inhibition studies by hybrid scaffolds for their activity against ovarian cancer.	Pubmed	0.0007785	1	0.002026	0.02011	1	1	EGFR
Pubmed	16622460	The alpha2beta1 integrin mediates the malignant phenotype on type I collagen in pancreatic cancer cell lines.	Pubmed	0.0007785	1	0.002026	0.02011	1	1	ITGA2
Pubmed	24905406	Direct analysis of hCG?cf glycosylation in normal and aberrant pregnancy by matrix-assisted laser desorption/ionization time-of-flight mass spectrometry.	Pubmed	0.0007785	1	0.002026	0.02011	1	1	CGB3
Pubmed	15544481	Therapeutic potential of natural compounds that regulate the activity of protein kinase C.	Pubmed	0.0007785	1	0.002026	0.02011	1	1	PRKCZ
Pubmed	19136889	HLA-E/human beta2-microglobulin transgenic pigs: protection against xenogeneic human anti-pig natural killer cell cytotoxicity.	Pubmed	0.0007785	1	0.002026	0.02011	1	1	B2M
Pubmed	20828536	Inhibition of dipeptidyl peptidase 4 regulates microvascular endothelial growth induced by inflammatory cytokines.	Pubmed	0.0007785	1	0.002026	0.02011	1	1	DPP4
Pubmed	22471663	Therapeutic targeting of the epidermal growth factor receptor in human cancer.	Pubmed	0.0007785	1	0.002026	0.02011	1	1	EGFR
Pubmed	12960102	Targeted overexpression of luteinizing hormone causes ovary-dependent functional adenomas restricted to cells of the Pit-1 lineage.	Pubmed	0.0007785	1	0.002026	0.02011	1	1	LHB
Pubmed	14691230	N-linked glycosylation of dipeptidyl peptidase IV (CD26): effects on enzyme activity, homodimer formation, and adenosine deaminase binding.	Pubmed	0.0007785	1	0.002026	0.02011	1	1	DPP4
Pubmed	3967899	Gm-3.2, a new granulocyte/macrophage alloantigen.	Pubmed	0.0007785	1	0.002026	0.02011	1	1	B2M
Pubmed	19824733	K3 fragment of amyloidogenic beta(2)-microglobulin forms ion channels: implication for dialysis related amyloidosis.	Pubmed	0.0007785	1	0.002026	0.02011	1	1	B2M
Pubmed	25605866	Myeloid-related protein 14 promotes inflammation and injury in meningitis.	Pubmed	0.0007785	1	0.002026	0.02011	1	1	S100A9
Pubmed	19757199	Clusterin as a diagnostic and prognostic marker for transitional cell carcinoma of the bladder.	Pubmed	0.0007785	1	0.002026	0.02011	1	1	CLU
Pubmed	23028094	EGFR 3'UTR 774T>C polymorphism contributes to bladder cancer risk.	Pubmed	0.0007785	1	0.002026	0.02011	1	1	EGFR
Pubmed	25122436	Clinical characteristics, tumor, node, metastasis status, and mutation rate in domain of epidermal growth factor receptor gene in serbian patients with lung adenocarcinoma.	Pubmed	0.0007785	1	0.002026	0.02011	1	1	EGFR
Pubmed	21272676	PHOSPHO1 is essential for mechanically competent mineralization and the avoidance of spontaneous fractures.	Pubmed	0.0007785	1	0.002026	0.02011	1	1	PHOSPHO1
Pubmed	26386832	Genetic polymorphism in the epidermal growth factor receptor gene predicts outcome in advanced non-small cell lung cancer patients treated with erlotinib.	Pubmed	0.0007785	1	0.002026	0.02011	1	1	EGFR
Pubmed	29848735	Radiological Features of Brain Metastases from Non-small Cell Lung Cancer Harboring	Pubmed	0.0007785	1	0.002026	0.02011	1	1	EGFR
Pubmed	28064403	Knockdown of clusterin alters mitochondrial dynamics, facilitates necrosis in camptothecin-induced cancer stem cells.	Pubmed	0.0007785	1	0.002026	0.02011	1	1	CLU
Pubmed	12435813	Overexpression of protein kinase Czeta confers protection against antileukemic drugs by inhibiting the redox-dependent sphingomyelinase activation.	Pubmed	0.0007785	1	0.002026	0.02011	1	1	PRKCZ
Pubmed	20843314	Chromogenic in situ hybridization to detect EGFR gene copy number in cell blocks from fine-needle aspirates of non small cell lung carcinomas and lung metastases from colo-rectal cancer.	Pubmed	0.0007785	1	0.002026	0.02011	1	1	EGFR
Pubmed	6972979	Murine lymphocyte alloantigens: the Ly-4 locus.	Pubmed	0.0007785	1	0.002026	0.02011	1	1	B2M
Pubmed	16161046	EGFR protein overexpression and gene amplification in squamous cell carcinomas of the esophagus.	Pubmed	0.0007785	1	0.002026	0.02011	1	1	EGFR
Pubmed	15829568	The membrane-anchoring domain of epidermal growth factor receptor ligands dictates their ability to operate in juxtacrine mode.	Pubmed	0.0007785	1	0.002026	0.02011	1	1	EGFR
Pubmed	26768632	Fecal Calprotectin as an Activity Marker of Inflammatory Bowel Disease in Children.	Pubmed	0.0007785	1	0.002026	0.02011	1	1	S100A9
Pubmed	10925249	Cutting edge: naive T cells masquerading as memory cells.	Pubmed	0.0007785	1	0.002026	0.02011	1	1	B2M
Pubmed	1627535	Damage in B2m genes and DNA methylation of H-2 genes are involved in loss of expression of class I MHC products on the membrane of LR.4, a cell line derivative of the T-cell lymphoma L5178Y.	Pubmed	0.0007785	1	0.002026	0.02011	1	1	B2M
Pubmed	17146284	Brain tumors in S100beta-v-erbB transgenic rats.	Pubmed	0.0007785	1	0.002026	0.02011	1	1	EGFR
Pubmed	1346234	Most gamma delta T cells develop normally in beta 2-microglobulin-deficient mice.	Pubmed	0.0007785	1	0.002026	0.02011	1	1	B2M
Pubmed	29923456	Transcription-independent expression of PKM? in the anterior cingulate cortex contributes to chronically maintained neuropathic pain.	Pubmed	0.0007785	1	0.002026	0.02011	1	1	PRKCZ
Pubmed	25526639	Clinical significance of soluble CD26 in malignant pleural mesothelioma.	Pubmed	0.0007785	1	0.002026	0.02011	1	1	DPP4
Pubmed	29976202	The exon 19-deleted EGFR undergoes ubiquitylation-mediated endocytic degradation via dynamin activity-dependent and -independent mechanisms.	Pubmed	0.0007785	1	0.002026	0.02011	1	1	EGFR
Pubmed	21128013	Extracellular matrix protein 1, a novel prognostic factor, is associated with metastatic potential of hepatocellular carcinoma.	Pubmed	0.0007785	1	0.002026	0.02011	1	1	ECM1
Pubmed	21903449	The impact of EGFR stimulation and inhibition on BPDE induced DNA fragmentation in oral/oropharyngeal mucosa in vitro.	Pubmed	0.0007785	1	0.002026	0.02011	1	1	EGFR
Pubmed	18154448	EGF-receptor targeting with monoclonal antibodies in colorectal carcinomas: rationale for a pharmacogenomic approach.	Pubmed	0.0007785	1	0.002026	0.02011	1	1	EGFR
Pubmed	12882907	Activation of protein kinase C-zeta by insulin and phosphatidylinositol-3,4,5-(PO4)3 is defective in muscle in type 2 diabetes and impaired glucose tolerance: amelioration by rosiglitazone and exercise.	Pubmed	0.0007785	1	0.002026	0.02011	1	1	PRKCZ
Pubmed	19542874	Clusterin is expressed in normal synoviocytes and in tenosynovial giant cell tumors of localized and diffuse types: diagnostic and histogenetic implications.	Pubmed	0.0007785	1	0.002026	0.02011	1	1	CLU
Pubmed	16707474	Vaccination with human HER-2/neu (435-443) CTL peptide induces effective antitumor immunity against HER-2/neu-expressing tumor cells in vivo.	Pubmed	0.0007785	1	0.002026	0.02011	1	1	B2M
Pubmed	23831077	Development- and activity-dependent expression of clusterin in the mouse olfactory bulb.	Pubmed	0.0007785	1	0.002026	0.02011	1	1	CLU
Pubmed	23800895	Associations between genetic polymorphisms of epidermal growth factor receptor (EGFR) and survival of colorectal cancer (CRC) patients treated with 5-fluorouracil-based chemotherapy.	Pubmed	0.0007785	1	0.002026	0.02011	1	1	EGFR
Pubmed	29580950	The Value of Early Depth of Response in Predicting Long-Term Outcome in EGFR-Mutant Lung Cancer.	Pubmed	0.0007785	1	0.002026	0.02011	1	1	EGFR
Pubmed	19147750	Functional analysis of epidermal growth factor receptor (EGFR) mutations and potential implications for EGFR targeted therapy.	Pubmed	0.0007785	1	0.002026	0.02011	1	1	EGFR
Pubmed	24720835	Expression of beclin 1 in non-small cell lung cancer: an immunohistochemical study.	Pubmed	0.0007785	1	0.002026	0.02011	1	1	EGFR
Pubmed	27229352	Effect of CLU genetic variants on cerebrospinal fluid and neuroimaging markers in healthy, mild cognitive impairment and Alzheimer's disease cohorts.	Pubmed	0.0007785	1	0.002026	0.02011	1	1	CLU
Pubmed	17448210	Pharmacodiagnostic evaluation of EGFR expression in oral squamous cell carcinoma.	Pubmed	0.0007785	1	0.002026	0.02011	1	1	EGFR
Pubmed	23337393	[Should elevated beta-HCG levels be an exclusion criteria in clinical trials? A case report of paraneoplastic secretion associated with lung adenocarcinoma].	Pubmed	0.0007785	1	0.002026	0.02011	1	1	CGB3
Pubmed	17142315	Epidermal growth factor receptor tyrosine kinase is modulated by GM3 interaction with N-linked GlcNAc termini of the receptor.	Pubmed	0.0007785	1	0.002026	0.02011	1	1	EGFR
Pubmed	27197272	Changes in Epidermal Growth Factor Receptor Gene Copy Number during Oral Carcinogenesis.	Pubmed	0.0007785	1	0.002026	0.02011	1	1	EGFR
Pubmed	28027711	Molecular modeling and statistical analysis in the design of derivatives of human dipeptidyl peptidase IV.	Pubmed	0.0007785	1	0.002026	0.02011	1	1	DPP4
Pubmed	23774386	Activity of gefitinib in a non-small-cell lung cancer patient with both activating and resistance EGFR mutations.	Pubmed	0.0007785	1	0.002026	0.02011	1	1	EGFR
Pubmed	21852109	EGFR gene copy number alteration is a better prognostic indicator than protein overexpression in oral tongue squamous cell carcinomas.	Pubmed	0.0007785	1	0.002026	0.02011	1	1	EGFR
Pubmed	23668355	Computer-aided identification of EGFR tyrosine kinase inhibitors using ginsenosides from Panax ginseng.	Pubmed	0.0007785	1	0.002026	0.02011	1	1	EGFR
Pubmed	22982659	Effects of pharmacokinetic processes and varied dosing schedules on the dynamics of acquired resistance to erlotinib in EGFR-mutant lung cancer.	Pubmed	0.0007785	1	0.002026	0.02011	1	1	EGFR
Pubmed	19759520	Dual targeting of EGFR can overcome a major drug resistance mutation in mouse models of EGFR mutant lung cancer.	Pubmed	0.0007785	1	0.002026	0.02011	1	1	EGFR
Pubmed	22970192	Suppression of IFN-induced transcription underlies IFN defects generated by activated Ras/MEK in human cancer cells.	Pubmed	0.0007785	1	0.002026	0.02011	1	1	GBP2
Pubmed	21132379	A role for epidermal growth factor receptor in idiopathic pulmonary fibrosis onset.	Pubmed	0.0007785	1	0.002026	0.02011	1	1	EGFR
Pubmed	18337603	VEGF inhibition and renal thrombotic microangiopathy.	Pubmed	0.0007785	1	0.002026	0.02011	1	1	EGFR
Pubmed	19789347	An A13 repeat within the 3'-untranslated region of epidermal growth factor receptor (EGFR) is frequently mutated in microsatellite instability colon cancers and is associated with increased EGFR expression.	Pubmed	0.0007785	1	0.002026	0.02011	1	1	EGFR
Pubmed	12906930	Degradation of endomorphin-2 at the supraspinal level in mice is initiated by dipeptidyl peptidase IV: an in vitro and in vivo study.	Pubmed	0.0007785	1	0.002026	0.02011	1	1	DPP4
Pubmed	21165163	EGFR-mutated lung cancer: a paradigm of molecular oncology.	Pubmed	0.0007785	1	0.002026	0.02011	1	1	EGFR
Pubmed	18940185	In vivo profiling of DPP4 inhibitors reveals alterations in collagen metabolism and accumulation of an amyloid peptide in rat plasma.	Pubmed	0.0007785	1	0.002026	0.02011	1	1	DPP4
Pubmed	18509184	Specific EGFR mutations predict treatment outcome of stage IIIB/IV patients with chemotherapy-naive non-small-cell lung cancer receiving first-line gefitinib monotherapy.	Pubmed	0.0007785	1	0.002026	0.02011	1	1	EGFR
Pubmed	30559455	CT Slice Thickness and Convolution Kernel Affect Performance of a Radiomic Model for Predicting EGFR Status in Non-Small Cell Lung Cancer: A Preliminary Study.	Pubmed	0.0007785	1	0.002026	0.02011	1	1	EGFR
Pubmed	22713695	Modelling the correlation between EGFr expression and tumour cell radiosensitivity, and combined treatments of radiation and monoclonal antibody EGFr inhibitors.	Pubmed	0.0007785	1	0.002026	0.02011	1	1	EGFR
Pubmed	20353268	Overexpression of clusterin correlates with tumor progression, metastasis in gastric cancer: a study on tissue microarrays.	Pubmed	0.0007785	1	0.002026	0.02011	1	1	CLU
Pubmed	23620765	EGFR mutations in Indian lung cancer patients: clinical correlation and outcome to EGFR targeted therapy.	Pubmed	0.0007785	1	0.002026	0.02011	1	1	EGFR
Pubmed	24419417	Survival outcome assessed according to tumor response and shrinkage pattern in patients with EGFR mutation-positive non-small-cell lung cancer treated with gefitinib or erlotinib.	Pubmed	0.0007785	1	0.002026	0.02011	1	1	EGFR
Pubmed	17348021	EGF-R regulates MMP function in fibroblasts through MAPK and AP-1 pathways.	Pubmed	0.0007785	1	0.002026	0.02011	1	1	EGFR
Pubmed	29785875	EGFR-TKIs in non-small-cell lung cancer: focus on clinical pharmacology and mechanisms of resistance.	Pubmed	0.0007785	1	0.002026	0.02011	1	1	EGFR
Pubmed	15819895	The structural comparison of the bacterial PepX and human DPP-IV reveals sites for the design of inhibitors of PepX activity.	Pubmed	0.0007785	1	0.002026	0.02011	1	1	DPP4
Pubmed	19333077	Absence of mutations in the epidermal growth factor receptor (EGFR) kinase domain in patients with mesothelioma.	Pubmed	0.0007785	1	0.002026	0.02011	1	1	EGFR
Pubmed	21562037	EGFR signaling regulates tumor cell migration in craniopharyngiomas.	Pubmed	0.0007785	1	0.002026	0.02011	1	1	EGFR
Pubmed	18708068	Kinetic coupling of folding and prolyl isomerization of beta2-microglobulin studied by mutational analysis.	Pubmed	0.0007785	1	0.002026	0.02011	1	1	B2M
Pubmed	24077285	An EGFR wild type-EGFRvIII-HB-EGF feed-forward loop regulates the activation of EGFRvIII.	Pubmed	0.0007785	1	0.002026	0.02011	1	1	EGFR
Pubmed	26645830	Different EGFR Gene Mutations in Exon 18, 19 and 21 as Prognostic and Predictive Markers in NSCLC: A Single Institution Analysis.	Pubmed	0.0007785	1	0.002026	0.02011	1	1	EGFR
Pubmed	25534657	Epidermal growth factor receptor mutations in East European non-small cell lung cancer patients.	Pubmed	0.0007785	1	0.002026	0.02011	1	1	EGFR
Pubmed	31184100	Association of GPIa C807T polymorphism with unexplained female infertility and IVF implantation failure.	Pubmed	0.0007785	1	0.002026	0.02011	1	1	ITGA2
Pubmed	29642161	Icotinib and whole-brain radiotherapy for the treatment in patients with brain metastases from EGFR-mutant nonsmall cell lung cancer: A retrospective study.	Pubmed	0.0007785	1	0.002026	0.02011	1	1	EGFR
Pubmed	23515283	Clusterin decreases hepatic SREBP-1c expression and lipid accumulation.	Pubmed	0.0007785	1	0.002026	0.02011	1	1	CLU
Pubmed	30906792	Neutrophil-Derived MRP14 Supports Plasma Cell Commitment and Protects Myeloma Cells from Apoptosis.	Pubmed	0.0007785	1	0.002026	0.02011	1	1	S100A9
Pubmed	21641394	Autoreactive cytotoxic T lymphocytes acquire higher expression of cytotoxic effector markers in the islets of NOD mice after priming in pancreatic lymph nodes.	Pubmed	0.0007785	1	0.002026	0.02011	1	1	B2M
Pubmed	12006662	Novel mechanism for regulation of epidermal growth factor receptor endocytosis revealed by protein kinase A inhibition.	Pubmed	0.0007785	1	0.002026	0.02011	1	1	EGFR
Pubmed	7626703	Expression of apolipoprotein J in the uterus is associated with tissue remodeling.	Pubmed	0.0007785	1	0.002026	0.02011	1	1	CLU
Pubmed	12675233	CD26/DPP IV in experimental and clinical organ transplantation.	Pubmed	0.0007785	1	0.002026	0.02011	1	1	DPP4
Pubmed	26232374	Phospho1 deficiency transiently modifies bone architecture yet produces consistent modification in osteocyte differentiation and vascular porosity with ageing.	Pubmed	0.0007785	1	0.002026	0.02011	1	1	PHOSPHO1
Pubmed	27590708	Potential influence of being overweight on the development of hepatic dysfunction in Japanese patients with EGFR-mutated non-small cell lung cancer undergoing gefitinib monotherapy: the Okayama Lung Cancer Study Group experience.	Pubmed	0.0007785	1	0.002026	0.02011	1	1	EGFR
Pubmed	10975809	A NK1.1+ thymocyte-derived TCR beta-chain transgene promotes positive selection of thymic NK1.1+ alpha beta T cells.	Pubmed	0.0007785	1	0.002026	0.02011	1	1	B2M
Pubmed	601588	[Acid-producing function of the stomach in pyloric ulcers].	Pubmed	0.0007785	1	0.002026	0.02011	1	1	ECM1
Pubmed	23282210	Discordance between EGFR expression and clinicopathologic parameters of colorectal adenocarcinoma in Taiwan.	Pubmed	0.0007785	1	0.002026	0.02011	1	1	EGFR
Pubmed	23878366	Neuronal major histocompatibility complex class I molecules are implicated in the generation of asymmetries in hippocampal circuitry.	Pubmed	0.0007785	1	0.002026	0.02011	1	1	B2M
Pubmed	17339452	Natural regulation of immunity to minor histocompatibility antigens.	Pubmed	0.0007785	1	0.002026	0.02011	1	1	B2M
Pubmed	12085191	Increased expression of beta 2-microglobulin in multidrug-resistant tumour cells.	Pubmed	0.0007785	1	0.002026	0.02011	1	1	B2M
Pubmed	18161656	(AC) dinucleotide repeat polymorphism in intron 1 of human EGFR shows ethnic specificities and high evidence for association with breast cancer.	Pubmed	0.0007785	1	0.002026	0.02011	1	1	EGFR
Pubmed	18649357	Clusterin is epigenetically regulated in prostate cancer.	Pubmed	0.0007785	1	0.002026	0.02011	1	1	CLU
Pubmed	30678455	EGFR inhibitor C225 Increases the Radio-Sensitivity of Human Breast Cancer Cells	Pubmed	0.0007785	1	0.002026	0.02011	1	1	EGFR
Pubmed	23244191	Epidermal growth factor receptor (EGFR) mutations and expression in squamous cell carcinoma of the esophagus in central Asia.	Pubmed	0.0007785	1	0.002026	0.02011	1	1	EGFR
Pubmed	16964427	UVB radiation induces expression of HIF-1alpha and VEGF through the EGFR/PI3K/DEC1 pathway.	Pubmed	0.0007785	1	0.002026	0.02011	1	1	EGFR
Pubmed	21157443	Epidermal growth factor receptor (EGFR) is overexpressed in high-grade dysplasia and adenocarcinoma of the esophagus and may represent a biomarker of histological progression in Barrett's esophagus (BE).	Pubmed	0.0007785	1	0.002026	0.02011	1	1	EGFR
Pubmed	28731495	Significance of neutrophil-to-lymphocyte ratio in Western advanced EGFR-mutated non-small cell lung cancer receiving a targeted therapy.	Pubmed	0.0007785	1	0.002026	0.02011	1	1	EGFR
Pubmed	27466542	Non-small Cell Lung Cancer in South Wales: Are Exon 19 Deletions and L858R Different?	Pubmed	0.0007785	1	0.002026	0.02011	1	1	EGFR
Pubmed	22102283	Endosomal accumulation of the activated epidermal growth factor receptor (EGFR) induces apoptosis.	Pubmed	0.0007785	1	0.002026	0.02011	1	1	EGFR
Pubmed	27014908	EGFR mediates hyperlipidemia-induced renal injury via regulating inflammation and oxidative stress: the detrimental role and mechanism of EGFR activation.	Pubmed	0.0007785	1	0.002026	0.02011	1	1	EGFR
Pubmed	1465432	Major histocompatibility complex class I-restricted T cells are required for resistance to Mycobacterium tuberculosis infection.	Pubmed	0.0007785	1	0.002026	0.02011	1	1	B2M
Pubmed	17960555	MMTV-EGF receptor transgene promotes preneoplastic conversion of multiple steroid hormone-responsive tissues.	Pubmed	0.0007785	1	0.002026	0.02011	1	1	EGFR
Pubmed	29849818	Epidermal Growth Factor Receptor Mutations and Their Prognostic Value with Carcinoembryonic Antigen in Pathological T1 Lung Adenocarcinoma.	Pubmed	0.0007785	1	0.002026	0.02011	1	1	EGFR
Pubmed	25563590	EGFR Transactivation by Peptide G Protein-Coupled Receptors in Cancer.	Pubmed	0.0007785	1	0.002026	0.02011	1	1	EGFR
Pubmed	24364033	Detection of EGFR mutations by TaqMan mutation detection assays powered by competitive allele-specific TaqMan PCR technology.	Pubmed	0.0007785	1	0.002026	0.02011	1	1	EGFR
Pubmed	30242112	Downregulation of	Pubmed	0.0007785	1	0.002026	0.02011	1	1	DPP4
Pubmed	23248150	Loss of epidermal growth factor receptor in vascular smooth muscle cells and cardiomyocytes causes arterial hypotension and cardiac hypertrophy.	Pubmed	0.0007785	1	0.002026	0.02011	1	1	EGFR
Pubmed	27462789	IL-17E synergizes with EGF and confers in vitro resistance to EGFR-targeted therapies in TNBC cells.	Pubmed	0.0007785	1	0.002026	0.02011	1	1	EGFR
Pubmed	29106415	Evolution and clinical impact of co-occurring genetic alterations in advanced-stage EGFR-mutant lung cancers.	Pubmed	0.0007785	1	0.002026	0.02011	1	1	EGFR
Pubmed	19220628	Clusterin expression in cutaneous CD30-positive lymphoproliferative disorders and their histologic simulants.	Pubmed	0.0007785	1	0.002026	0.02011	1	1	CLU
Pubmed	15494406	Direct measurement of the thermodynamic parameters of amyloid formation by isothermal titration calorimetry.	Pubmed	0.0007785	1	0.002026	0.02011	1	1	B2M
Pubmed	24899223	Mutation analysis of genes in the EGFR pathway in Head and Neck cancer patients: implications for anti-EGFR treatment response.	Pubmed	0.0007785	1	0.002026	0.02011	1	1	EGFR
Pubmed	19171934	Luciferase fragment complementation imaging of conformational changes in the epidermal growth factor receptor.	Pubmed	0.0007785	1	0.002026	0.02011	1	1	EGFR
Pubmed	24861878	JAK2/STAT3 targeted therapy suppresses tumor invasion via disruption of the EGFRvIII/JAK2/STAT3 axis and associated focal adhesion in EGFRvIII-expressing glioblastoma.	Pubmed	0.0007785	1	0.002026	0.02011	1	1	EGFR
Pubmed	26302057	Protection against Paracoccidioides brasiliensis infection in mice treated with modulated dendritic cells relies on inhibition of interleukin-10 production by CD8+ T cells.	Pubmed	0.0007785	1	0.002026	0.02011	1	1	B2M
Pubmed	20039046	p38 MAPK-regulated EGFR internalization takes place in keratinocyte monolayer during stress conditions.	Pubmed	0.0007785	1	0.002026	0.02011	1	1	EGFR
Pubmed	25173459	Evaluation of gefitinib efficacy according to body surface area in patients with non-small cell lung cancer harboring an EGFR mutation.	Pubmed	0.0007785	1	0.002026	0.02011	1	1	EGFR
Pubmed	21043527	Proteomic signature of Apolipoprotein J in the early phase of new-onset myocardial infarction.	Pubmed	0.0007785	1	0.002026	0.02011	1	1	CLU
Pubmed	22525557	Effusion immunocytochemistry as an alternative approach for the selection of first-line targeted therapy in advanced lung adenocarcinoma.	Pubmed	0.0007785	1	0.002026	0.02011	1	1	EGFR
Pubmed	18827604	An alternative method for screening EGFR mutation using RFLP in non-small cell lung cancer patients.	Pubmed	0.0007785	1	0.002026	0.02011	1	1	EGFR
Pubmed	15920544	EGFR gene amplification in breast cancer: correlation with epidermal growth factor receptor mRNA and protein expression and HER-2 status and absence of EGFR-activating mutations.	Pubmed	0.0007785	1	0.002026	0.02011	1	1	EGFR
Pubmed	16859684	Both clathrin-positive and -negative coats are involved in endosomal sorting of the EGF receptor.	Pubmed	0.0007785	1	0.002026	0.02011	1	1	EGFR
Pubmed	29427528	Cross-talk between sphingosine-1-phosphate and EGFR signaling pathways enhances human glioblastoma cell invasiveness.	Pubmed	0.0007785	1	0.002026	0.02011	1	1	EGFR
Pubmed	27569656	SIAH and EGFR, Two RAS Pathway Biomarkers, are Highly Prognostic in Locally Advanced and Metastatic Breast Cancer.	Pubmed	0.0007785	1	0.002026	0.02011	1	1	EGFR
Pubmed	30148841	Exposure to nicotine-derived nitrosamine ketone and arecoline synergistically facilitates tumor aggressiveness via overexpression of epidermal growth factor receptor and its downstream signaling in head and neck squamous cell carcinoma.	Pubmed	0.0007785	1	0.002026	0.02011	1	1	EGFR
Pubmed	23174717	Epidermal growth factor receptor mutations in female patients with postoperative recurrent non-small-cell lung cancer.	Pubmed	0.0007785	1	0.002026	0.02011	1	1	EGFR
Pubmed	29854785	A Comparative Study for Detection of	Pubmed	0.0007785	1	0.002026	0.02011	1	1	EGFR
Pubmed	21291952	In vivo expansion of the megakaryocyte progenitor cell population in adult CD26-deficient mice.	Pubmed	0.0007785	1	0.002026	0.02011	1	1	DPP4
Pubmed	19020749	Growth and molecular interactions of the anti-EGFR antibody cetuximab and the DNA cross-linking agent cisplatin in gefitinib-resistant MDA-MB-468 cells: new prospects in the treatment of triple-negative/basal-like breast cancer.	Pubmed	0.0007785	1	0.002026	0.02011	1	1	EGFR
Pubmed	30431077	Nicotine promotes lymph node metastasis and cetuximab resistance in head and neck squamous cell carcinoma.	Pubmed	0.0007785	1	0.002026	0.02011	1	1	EGFR
Pubmed	14739220	Genetic variation responsible for mouse strain differences in integrin alpha 2 expression is associated with altered platelet responses to collagen.	Pubmed	0.0007785	1	0.002026	0.02011	1	1	ITGA2
Pubmed	23959269	Targeted therapies: Afatinib--new therapy option for EGFR-mutant lung cancer.	Pubmed	0.0007785	1	0.002026	0.02011	1	1	EGFR
Pubmed	8171644	beta-2 Microglobulin gene disruption prolongs murine islet allograft survival in NOD mice.	Pubmed	0.0007785	1	0.002026	0.02011	1	1	B2M
Pubmed	23265711	Predictive value of epidermal growth factor receptor expression for first-line chemotherapy plus cetuximab in patients with head and neck and colorectal cancer: analysis of data from the EXTREME and CRYSTAL studies.	Pubmed	0.0007785	1	0.002026	0.02011	1	1	EGFR
Pubmed	9729040	The crystal structure of H-2Dd MHC class I complexed with the HIV-1-derived peptide P18-I10 at 2.4 A resolution: implications for T cell and NK cell recognition.	Pubmed	0.0007785	1	0.002026	0.02011	1	1	B2M
Pubmed	20512075	Erlotinib at a dose of 25 mg daily for non-small cell lung cancers with EGFR mutations.	Pubmed	0.0007785	1	0.002026	0.02011	1	1	EGFR
Pubmed	28302866	Genomic Profiling of Patient-Derived Xenografts for Lung Cancer Identifies	Pubmed	0.0007785	1	0.002026	0.02011	1	1	B2M
Pubmed	25211075	Bat origins of MERS-CoV supported by bat coronavirus HKU4 usage of human receptor CD26.	Pubmed	0.0007785	1	0.002026	0.02011	1	1	DPP4
Pubmed	25076422	Plasma clusterin (ApoJ) levels are associated with adiposity and systemic inflammation.	Pubmed	0.0007785	1	0.002026	0.02011	1	1	CLU
Pubmed	16083266	Extended Range Proteomic Analysis (ERPA): a new and sensitive LC-MS platform for high sequence coverage of complex proteins with extensive post-translational modifications-comprehensive analysis of beta-casein and epidermal growth factor receptor (EGFR).	Pubmed	0.0007785	1	0.002026	0.02011	1	1	EGFR
Pubmed	21986942	A novel epidermal growth factor receptor variant lacking multiple domains directly activates transcription and is overexpressed in tumors.	Pubmed	0.0007785	1	0.002026	0.02011	1	1	EGFR
Pubmed	30387880	EGFR-TKIs plus local therapy demonstrated survival benefit than EGFR-TKIs alone in EGFR-mutant NSCLC patients with oligometastatic or oligoprogressive liver metastases.	Pubmed	0.0007785	1	0.002026	0.02011	1	1	EGFR
Pubmed	24239648	The role of the 3' region of mammalian gonadotropin ? subunit gene in the luteinizing hormone to chorionic gonadotropin evolution.	Pubmed	0.0007785	1	0.002026	0.02011	1	1	CGB3
Pubmed	11752569	Regulation of daily locomotor activity and sleep by hypothalamic EGF receptor signaling.	Pubmed	0.0007785	1	0.002026	0.02011	1	1	EGFR
Pubmed	8006596	Class I dependence of the development of CD4+ CD8- NK1.1+ thymocytes.	Pubmed	0.0007785	1	0.002026	0.02011	1	1	B2M
Pubmed	19479974	Mucinous gastric carcinomas: clinicopathologic and molecular analyses.	Pubmed	0.0007785	1	0.002026	0.02011	1	1	EGFR
Pubmed	19726454	Prognostic significance of epidermal growth factor receptor phosphorylation and mutation in head and neck squamous cell carcinoma.	Pubmed	0.0007785	1	0.002026	0.02011	1	1	EGFR
Pubmed	26993607	The comparison of outcomes from tyrosine kinase inhibitor monotherapy in second- or third-line for advanced non-small-cell lung cancer patients with wild-type or unknown EGFR status.	Pubmed	0.0007785	1	0.002026	0.02011	1	1	EGFR
Pubmed	18381415	Epidermal growth factor receptor gene amplification is acquired in association with tumor progression of EGFR-mutated lung cancer.	Pubmed	0.0007785	1	0.002026	0.02011	1	1	EGFR
Pubmed	12175726	Human CD26 expression in transgenic mice affects murine T-cell populations and modifies their subset distribution.	Pubmed	0.0007785	1	0.002026	0.02011	1	1	DPP4
Pubmed	8352774	Molecular cloning and sequencing of sulfated glycoprotein-2 cDNA from testis of mouse: implications of two different mRNAs of SGP-2.	Pubmed	0.0007785	1	0.002026	0.02011	1	1	CLU
Pubmed	21273581	EGFR codon 497 polymorphism - implications for receptor sensitivity to inhibitors in HNSCC cell lines.	Pubmed	0.0007785	1	0.002026	0.02011	1	1	EGFR
Pubmed	27699178	Molecular Diagnostics for Precision Medicine in Colorectal Cancer: Current Status and Future Perspective.	Pubmed	0.0007785	1	0.002026	0.02011	1	1	EGFR
Pubmed	3902633	A new beta-2 microglobulin allele in mice defined by DNA sequencing.	Pubmed	0.0007785	1	0.002026	0.02011	1	1	B2M
Pubmed	28356285	Exosome production and its regulation of EGFR during wound healing in renal tubular cells.	Pubmed	0.0007785	1	0.002026	0.02011	1	1	EGFR
Pubmed	23883959	Consecutive fecal calprotectin measurements to predict relapse in patients with ulcerative colitis receiving infliximab maintenance therapy.	Pubmed	0.0007785	1	0.002026	0.02011	1	1	S100A9
Pubmed	26645716	EGFR mutation and lobar location of lung adenocarcinoma.	Pubmed	0.0007785	1	0.002026	0.02011	1	1	EGFR
Pubmed	25884382	sCLU regulates cisplatin chemosensitivity of lung cancer cells in vivo.	Pubmed	0.0007785	1	0.002026	0.02011	1	1	CLU
Pubmed	19276387	Rho GDP dissociation inhibitor 2 suppresses metastasis via unconventional regulation of RhoGTPases.	Pubmed	0.0007785	1	0.002026	0.02011	1	1	ARHGDIB
Pubmed	19284997	Human beta-2 microglobulin W60V mutant structure: Implications for stability and amyloid aggregation.	Pubmed	0.0007785	1	0.002026	0.02011	1	1	B2M
Pubmed	23148678	Clinical utility of serum reproductive hormones for the early diagnosis of ectopic pregnancy in the first trimester.	Pubmed	0.0007785	1	0.002026	0.02011	1	1	CGB3
Pubmed	12675243	CD26 expression on cutaneous infiltrates from patients with cutaneous T-cell lymphoma (CTCL) CD26 in cutaneous T-cell lymphoma patients.	Pubmed	0.0007785	1	0.002026	0.02011	1	1	DPP4
Pubmed	17080454	Low-power millimeter wave radiations do not alter stress-sensitive gene expression of chaperone proteins.	Pubmed	0.0007785	1	0.002026	0.02011	1	1	CLU
Pubmed	22285168	Erlotinib versus standard chemotherapy as first-line treatment for European patients with advanced EGFR mutation-positive non-small-cell lung cancer (EURTAC): a multicentre, open-label, randomised phase 3 trial.	Pubmed	0.0007785	1	0.002026	0.02011	1	1	EGFR
Pubmed	23207445	EGFR gene mutation study in cytology specimens.	Pubmed	0.0007785	1	0.002026	0.02011	1	1	EGFR
Pubmed	23852459	The incidence of EGFR-activating mutations in bone metastases of lung adenocarcinoma.	Pubmed	0.0007785	1	0.002026	0.02011	1	1	EGFR
Pubmed	30011810	The Association between Epidermal Growth Factor Receptor (	Pubmed	0.0007785	1	0.002026	0.02011	1	1	EGFR
Pubmed	22617144	Clusterin in neurological disorders: molecular perspectives and clinical relevance.	Pubmed	0.0007785	1	0.002026	0.02011	1	1	CLU
Pubmed	23460744	Myeloid-derived suppressor cells regulate growth of multiple myeloma by inhibiting T cells in bone marrow.	Pubmed	0.0007785	1	0.002026	0.02011	1	1	S100A9
Pubmed	24870738	Analysis of CEA expression and EGFR mutation status in non-small cell lung cancers.	Pubmed	0.0007785	1	0.002026	0.02011	1	1	EGFR
Pubmed	22082661	Clusterin overexpression and its possible protective role in transthyretin deposition in familial amyloidotic polyneuropathy.	Pubmed	0.0007785	1	0.002026	0.02011	1	1	CLU
Pubmed	12397041	Transcriptional regulation of a mesangium-predominant gene, megsin.	Pubmed	0.0007785	1	0.002026	0.02011	1	1	SERPINB7
Pubmed	17537621	Epidermal growth factor receptor double activating mutations involving both exons 19 and 21 exist in Chinese non-small cell lung cancer patients.	Pubmed	0.0007785	1	0.002026	0.02011	1	1	EGFR
Pubmed	30604588	High expression of FAM13A was associated with increasing the liver cirrhosis risk.	Pubmed	0.0007785	1	0.002026	0.02011	1	1	FAM13A
Pubmed	10731668	Characterization of the N-oligosaccharides attached to the atypical Asn-X-Cys sequence of recombinant human epidermal growth factor receptor.	Pubmed	0.0007785	1	0.002026	0.02011	1	1	EGFR
Pubmed	28320414	Epidermal growth factor receptor and epididymis invasion as prognostic biomarkers in clinical stage I testicular germ cell tumours.	Pubmed	0.0007785	1	0.002026	0.02011	1	1	EGFR
Pubmed	23791944	Structural evaluation of EGFR inhibition mechanisms for nanobodies/VHH domains.	Pubmed	0.0007785	1	0.002026	0.02011	1	1	EGFR
Pubmed	30905312	Survival benefit of first-generation epidermal growth factor receptor-tyrosine kinase inhibitors in female with advanced lung cancer.	Pubmed	0.0007785	1	0.002026	0.02011	1	1	EGFR
Pubmed	17845757	[Status and clinicopathologic implication of epidermal growth factor receptor mutation in non-small cell carcinoma of lung].	Pubmed	0.0007785	1	0.002026	0.02011	1	1	EGFR
Pubmed	3048575	In vitro production of beta 2 microglobulin by human myeloma cells.	Pubmed	0.0007785	1	0.002026	0.02011	1	1	B2M
Pubmed	12244101	Lack of constitutive activity of the free kinase domain of protein kinase C zeta. Dependence on transphosphorylation of the activation loop.	Pubmed	0.0007785	1	0.002026	0.02011	1	1	PRKCZ
Pubmed	24278442	Quantitative identification of mutant alleles derived from lung cancer in plasma cell-free DNA via anomaly detection using deep sequencing data.	Pubmed	0.0007785	1	0.002026	0.02011	1	1	EGFR
Pubmed	25277177	Epigenetic suppression of EGFR signaling in G-CIMP+ glioblastomas.	Pubmed	0.0007785	1	0.002026	0.02011	1	1	EGFR
Pubmed	2387851	Purification and characterization of apolipoprotein J.	Pubmed	0.0007785	1	0.002026	0.02011	1	1	CLU
Pubmed	10199391	HIV Tat represses transcription of the beta 2-microglobulin promoter.	Pubmed	0.0007785	1	0.002026	0.02011	1	1	B2M
Pubmed	18043914	Studies of distribution, location and dynamic properties of EGFR on the cell surface measured by image correlation spectroscopy.	Pubmed	0.0007785	1	0.002026	0.02011	1	1	EGFR
Pubmed	12069497	Selective inhibition of the epidermal growth factor receptor impairs intestinal adaptation after small bowel resection.	Pubmed	0.0007785	1	0.002026	0.02011	1	1	EGFR
Pubmed	25119593	Different mutational characteristics of TSG in cell lines and surgical specimens.	Pubmed	0.0007785	1	0.002026	0.02011	1	1	EGFR
Pubmed	27160750	Anti EGFR therapy in the treatment of non-metastatic head and neck squamous cell carcinoma: The current evidence.	Pubmed	0.0007785	1	0.002026	0.02011	1	1	EGFR
Pubmed	28380449	Is MPP a good prognostic factor in stage III lung adenocarcinoma with EGFR exon 19 mutation?	Pubmed	0.0007785	1	0.002026	0.02011	1	1	EGFR
Pubmed	20840671	Homogeneous EGFR amplification defines a subset of aggressive Barrett's adenocarcinomas with poor prognosis.	Pubmed	0.0007785	1	0.002026	0.02011	1	1	EGFR
Pubmed	24419415	Effectiveness of gefitinib against non-small-cell lung cancer with the uncommon EGFR mutations G719X and L861Q.	Pubmed	0.0007785	1	0.002026	0.02011	1	1	EGFR
Pubmed	23319610	Inhibition of triple-negative breast cancer models by combinations of antibodies to EGFR.	Pubmed	0.0007785	1	0.002026	0.02011	1	1	EGFR
Pubmed	23963360	Combining erlotinib and cetuximab is associated with activity in patients with non-small cell lung cancer (including squamous cell carcinomas) and wild-type EGFR or resistant mutations.	Pubmed	0.0007785	1	0.002026	0.02011	1	1	EGFR
Pubmed	2112266	Normal development of mice deficient in beta 2M, MHC class I proteins, and CD8+ T cells.	Pubmed	0.0007785	1	0.002026	0.02011	1	1	B2M
Pubmed	16715136	Gab1 signaling is regulated by EGF receptor sorting in early endosomes.	Pubmed	0.0007785	1	0.002026	0.02011	1	1	EGFR
Pubmed	23616621	Macrophage-derived matrix vesicles: an alternative novel mechanism for microcalcification in atherosclerotic plaques.	Pubmed	0.0007785	1	0.002026	0.02011	1	1	S100A9
Pubmed	16098054	Constitutive expression of epidermal growth factor receptors on normal human melanocytes.	Pubmed	0.0007785	1	0.002026	0.02011	1	1	EGFR
Pubmed	23064060	The pharmacokinetics and long-term therapeutic effects of gefitinib in patients with lung adenocarcinoma harboring the epidermal growth factor receptor(EGFR)mutation.	Pubmed	0.0007785	1	0.002026	0.02011	1	1	EGFR
Pubmed	27318681	Molecular Targeting of Growth Factor Receptor Signaling in Radiation Oncology.	Pubmed	0.0007785	1	0.002026	0.02011	1	1	EGFR
Pubmed	12681285	Small interfering RNAs suppress the expression of endogenous and GFP-fused epidermal growth factor receptor (erbB1) and induce apoptosis in erbB1-overexpressing cells.	Pubmed	0.0007785	1	0.002026	0.02011	1	1	EGFR
Pubmed	9712035	CD1 expression defines subsets of follicular and marginal zone B cells in the spleen: beta 2-microglobulin-dependent and independent forms.	Pubmed	0.0007785	1	0.002026	0.02011	1	1	B2M
Pubmed	12746839	ErbB1 and prostate cancer: ErbB1 activity is essential for androgen-induced proliferation and protection from the apoptotic effects of LY294002.	Pubmed	0.0007785	1	0.002026	0.02011	1	1	EGFR
Pubmed	28179328	Frequency of Epidermal Growth Factor Receptor Mutation in Smokers with Lung Cancer Without Pulmonary Emphysema.	Pubmed	0.0007785	1	0.002026	0.02011	1	1	EGFR
Pubmed	27092882	Clinical and genetic features of lung squamous cell cancer in never-smokers.	Pubmed	0.0007785	1	0.002026	0.02011	1	1	EGFR
Pubmed	22335887	Metastatic brain tumors from non-small cell lung cancer with EGFR mutations: distinguishing influence of exon 19 deletion on radiographic features.	Pubmed	0.0007785	1	0.002026	0.02011	1	1	EGFR
Pubmed	25119504	Co-expression of EGFR and CK5/6 in primary squamous cell carcinoma of the breast.	Pubmed	0.0007785	1	0.002026	0.02011	1	1	EGFR
Pubmed	15048184	Elevated levels of b-human chorionic gonadotropin and human placental lactogen between 11-13 weeks' gestation and subsequent pregnancy complications in Omani women.	Pubmed	0.0007785	1	0.002026	0.02011	1	1	CGB3
Pubmed	19272528	EGF-receptor regulates salivary gland branching morphogenesis by supporting proliferation and maturation of epithelial cells and survival of mesenchymal cells.	Pubmed	0.0007785	1	0.002026	0.02011	1	1	EGFR
Pubmed	28575350	Dipeptidyl Peptidase IV as a Prognostic Marker and Therapeutic Target in Papillary Thyroid Carcinoma.	Pubmed	0.0007785	1	0.002026	0.02011	1	1	DPP4
Pubmed	21884205	Epidermal growth factor receptor gene amplification and protein overexpression in basal-like carcinoma of the breast.	Pubmed	0.0007785	1	0.002026	0.02011	1	1	EGFR
Pubmed	25704955	Chronic nicotine exposure mediates resistance to EGFR-TKI in EGFR-mutated lung cancer via an EGFR signal.	Pubmed	0.0007785	1	0.002026	0.02011	1	1	EGFR
Pubmed	19174819	Epidermal growth factor receptor kinase domain mutations are rare in salivary gland carcinomas.	Pubmed	0.0007785	1	0.002026	0.02011	1	1	EGFR
Pubmed	24063894	Cetuximab response of lung cancer-derived EGF receptor mutants is associated with asymmetric dimerization.	Pubmed	0.0007785	1	0.002026	0.02011	1	1	EGFR
Pubmed	20949592	Recurrent pure CNS germinoma with markedly elevated serum and cerebrospinal fluid human chorionic gonadotropin-beta (HCG?).	Pubmed	0.0007785	1	0.002026	0.02011	1	1	CGB3
Pubmed	20952227	Up-regulation of EGF receptor and its ligands, AREG, EREG, and HB-EGF in oral lichen planus.	Pubmed	0.0007785	1	0.002026	0.02011	1	1	EGFR
Pubmed	28263971	EGFR-mediated macrophage activation promotes colitis-associated tumorigenesis.	Pubmed	0.0007785	1	0.002026	0.02011	1	1	EGFR
Pubmed	10558996	Persistence of memory CD8 T cells in MHC class I-deficient mice.	Pubmed	0.0007785	1	0.002026	0.02011	1	1	B2M
Pubmed	18771282	Functional and structural stability of the epidermal growth factor receptor in detergent micelles and phospholipid nanodiscs.	Pubmed	0.0007785	1	0.002026	0.02011	1	1	EGFR
Pubmed	24514002	New and recurrent SERPINB7 mutations in seven Chinese patients with Nagashima-type palmoplantar keratosis.	Pubmed	0.0007785	1	0.002026	0.02011	1	1	SERPINB7
Pubmed	8100523	Dipeptidyl-peptidase IV hydrolyses gastric inhibitory polypeptide, glucagon-like peptide-1(7-36)amide, peptide histidine methionine and is responsible for their degradation in human serum.	Pubmed	0.0007785	1	0.002026	0.02011	1	1	DPP4
Pubmed	26339388	Dipeptidyl peptidase-4 expression in pancreatic tissue from patients with congenital hyperinsulinism.	Pubmed	0.0007785	1	0.002026	0.02011	1	1	DPP4
Pubmed	25057940	V843I, a lung cancer predisposing EGFR mutation, is responsible for resistance to EGFR tyrosine kinase inhibitors.	Pubmed	0.0007785	1	0.002026	0.02011	1	1	EGFR
Pubmed	9537773	Expression of aminopeptidase N and dipeptidyl peptidase IV in the healthy and asthmatic bronchus.	Pubmed	0.0007785	1	0.002026	0.02011	1	1	DPP4
Pubmed	7877975	Targeted overexpression of luteinizing hormone in transgenic mice leads to infertility, polycystic ovaries, and ovarian tumors.	Pubmed	0.0007785	1	0.002026	0.02011	1	1	LHB
Pubmed	8314025	Major histocompatibility complex class I-deficient NOD-B2mnull mice are diabetes and insulitis resistant.	Pubmed	0.0007785	1	0.002026	0.02011	1	1	B2M
Pubmed	20058210	Clusterin expression inversely correlates with chemosensitivity and predicts poor survival in patients with locally advanced cervical cancer treated with cisplatin-based neoadjuvant chemotherapy and radical hysterectomy.	Pubmed	0.0007785	1	0.002026	0.02011	1	1	CLU
Pubmed	23425899	[EGFR mutation status in Uighur lung adenocarcinoma patients].	Pubmed	0.0007785	1	0.002026	0.02011	1	1	EGFR
Pubmed	23510392	Evaluation of vaginal fluid ?-human chorionic gonadotrophin for the diagnosis of preterm premature rupture of membranes.	Pubmed	0.0007785	1	0.002026	0.02011	1	1	CGB3
Pubmed	25913811	DPP-4 inhibition improves a sexual condition?	Pubmed	0.0007785	1	0.002026	0.02011	1	1	DPP4
Pubmed	17164499	Platelet glycoprotein Ia 807C/T and 873G/A polymorphisms in patients with venous thromboembolism.	Pubmed	0.0007785	1	0.002026	0.02011	1	1	ITGA2
Pubmed	26373925	Serum calprotectin (S100A8/9): an independent predictor of ultrasound synovitis in patients with rheumatoid arthritis.	Pubmed	0.0007785	1	0.002026	0.02011	1	1	S100A9
Pubmed	25122001	The role of dipeptidyl peptidase 4 (DPP4) in the preservation of renal function: DPP4 involvement in hemoglobin expression.	Pubmed	0.0007785	1	0.002026	0.02011	1	1	DPP4
Pubmed	25173978	EGFR has a tumour-promoting role in liver macrophages during hepatocellular carcinomaáformation.	Pubmed	0.0007785	1	0.002026	0.02011	1	1	EGFR
Pubmed	12429802	Clusterin expression in malignant lymphomas: a survey of 266 cases.	Pubmed	0.0007785	1	0.002026	0.02011	1	1	CLU
Pubmed	21775422	Forced dimerization increases the activity of ?EGFR/EGFRvIII and enhances its oncogenicity.	Pubmed	0.0007785	1	0.002026	0.02011	1	1	EGFR
Pubmed	21107857	Phosphatidylinositol-4,5-bisphosphate regulates epidermal growth factor receptor activation.	Pubmed	0.0007785	1	0.002026	0.02011	1	1	EGFR
Pubmed	25286840	Multi-crystal native SAD analysis at 6?keV.	Pubmed	0.0007785	1	0.002026	0.02011	1	1	EGFR
Pubmed	21059755	Epidermal growth factor receptor and caveolin-1 coexpression identifies adult supratentorial ependymomas with rapid unfavorable outcomes.	Pubmed	0.0007785	1	0.002026	0.02011	1	1	EGFR
Pubmed	24581850	Alpha 2 integrin gene (ITGA2) polymorphism in renal transplant recipients with and without drug induced gingival overgrowth.	Pubmed	0.0007785	1	0.002026	0.02011	1	1	ITGA2
Pubmed	9619532	The expression of the urinary forms of human luteinizing hormone beta fragment in various populations as assessed by a specific immunoradiometric assay.	Pubmed	0.0007785	1	0.002026	0.02011	1	1	LHB
Pubmed	28392461	Recombinant EGFR/MMP-2 bi-targeted fusion protein markedly binding to non-small-cell lung carcinoma and exerting potent therapeutic efficacy.	Pubmed	0.0007785	1	0.002026	0.02011	1	1	EGFR
Pubmed	22321542	[Epidermal growth factor receptor gene mutations and clinicopathologic correlation in 309 patients with non-small cell lung cancer].	Pubmed	0.0007785	1	0.002026	0.02011	1	1	EGFR
Pubmed	19799519	Asymmetric distribution of epidermal growth factor receptor directs the fate of normal and cancer keratinocytes in vitro.	Pubmed	0.0007785	1	0.002026	0.02011	1	1	EGFR
Pubmed	20603455	Association of plasma clusterin concentration with severity, pathology, and progression in Alzheimer disease.	Pubmed	0.0007785	1	0.002026	0.02011	1	1	CLU
Pubmed	18704411	Total HLA class I loss in a sarcomatoid renal carcinoma cell line caused by the coexistence of distinct mutations in the two encoding beta2-microglobulin genes.	Pubmed	0.0007785	1	0.002026	0.02011	1	1	B2M
Pubmed	12134089	Ligand-independent dimer formation of epidermal growth factor receptor (EGFR) is a step separable from ligand-induced EGFR signaling.	Pubmed	0.0007785	1	0.002026	0.02011	1	1	EGFR
Pubmed	11404484	Positive selection of an MHC class-I restricted TCR in the absence of classical MHC class I molecules.	Pubmed	0.0007785	1	0.002026	0.02011	1	1	B2M
Pubmed	24477687	Promotion of cell proliferation by clusterin in the renal tissue repair phase after ischemia-reperfusion injury.	Pubmed	0.0007785	1	0.002026	0.02011	1	1	CLU
Pubmed	18407408	Better survival with EGFR exon 19 than exon 21 mutations in gefitinib-treated non-small cell lung cancer patients is due to differential inhibition of downstream signals.	Pubmed	0.0007785	1	0.002026	0.02011	1	1	EGFR
Pubmed	25057173	EGFR biomarkers predict benefit from vandetanib in combination with docetaxel in a randomized phase III study of second-line treatment of patients with advanced non-small cell lung cancer.	Pubmed	0.0007785	1	0.002026	0.02011	1	1	EGFR
Pubmed	30382089	Redox regulation of EGFR steers migration of hypoxic mammary cells towards oxygen.	Pubmed	0.0007785	1	0.002026	0.02011	1	1	EGFR
Pubmed	16682612	Platelet expression profiling and clinical validation of myeloid-related protein-14 as a novel determinant of cardiovascular events.	Pubmed	0.0007785	1	0.002026	0.02011	1	1	S100A9
Pubmed	21672052	Dipeptidyl peptidase IV (DPP4) deficiency increases Th1-driven allergic contact dermatitis.	Pubmed	0.0007785	1	0.002026	0.02011	1	1	DPP4
Pubmed	19358731	Genetic ablation or pharmacological blockade of dipeptidyl peptidase IV does not impact T cell-dependent immune responses.	Pubmed	0.0007785	1	0.002026	0.02011	1	1	DPP4
Pubmed	24355440	Intratumoral distribution of EGFR-amplified and EGFR-mutated cells in pulmonary adenocarcinoma.	Pubmed	0.0007785	1	0.002026	0.02011	1	1	EGFR
Pubmed	30061238	Phase I Study Evaluating the Combination of Afatinib with Carboplatin and Pemetrexed After First-line EGFR-TKIs.	Pubmed	0.0007785	1	0.002026	0.02011	1	1	EGFR
Pubmed	11801591	Cleaved beta 2-microglobulin partially attains a conformation that has amyloidogenic features.	Pubmed	0.0007785	1	0.002026	0.02011	1	1	B2M
Pubmed	11894933	The beta2-microglobulin mRNA in human Daudi cells has a mutated initiation codon but is still inducible by interferon.	Pubmed	0.0007785	1	0.002026	0.02011	1	1	B2M
Pubmed	28560681	Significance of EGFR Expression in Circulating Tumor Cells.	Pubmed	0.0007785	1	0.002026	0.02011	1	1	EGFR
Pubmed	27259329	Distribution of EGFR Mutations in 10,607 Russian Patients with Lung Cancer.	Pubmed	0.0007785	1	0.002026	0.02011	1	1	EGFR
Pubmed	29268862	EGF receptor signaling, phosphorylation, ubiquitylation and endocytosis in tumors in vivo.	Pubmed	0.0007785	1	0.002026	0.02011	1	1	EGFR
Pubmed	19656587	Macrophage suppression following phagocytosis of apoptotic neutrophils is mediated by the S100A9 calcium-binding protein.	Pubmed	0.0007785	1	0.002026	0.02011	1	1	S100A9
Pubmed	28655714	Epidermal growth factor receptor restoration rescues the fatty liver regeneration in mice.	Pubmed	0.0007785	1	0.002026	0.02011	1	1	EGFR
Pubmed	12239451	Increased expression of dipeptidyl peptidase IV in human mesothelial cells by malignant ascites from ovarian carcinoma patients.	Pubmed	0.0007785	1	0.002026	0.02011	1	1	DPP4
Pubmed	19020901	EGFR mutations and HER2/3 protein expression and clinical outcome in Chinese advanced non-small cell lung cancer patients treated with gefitinib.	Pubmed	0.0007785	1	0.002026	0.02011	1	1	EGFR
Pubmed	29540503	Integrin ?2 marks a niche of trophoblast progenitor cells in first trimester human placenta.	Pubmed	0.0007785	1	0.002026	0.02011	1	1	ITGA2
Pubmed	25402950	The chaperone activity of clusterin is dependent on glycosylation and redox environment.	Pubmed	0.0007785	1	0.002026	0.02011	1	1	CLU
Pubmed	16154213	CD26 modulates nociception in mice via its dipeptidyl-peptidase IV activity.	Pubmed	0.0007785	1	0.002026	0.02011	1	1	DPP4
Pubmed	29160692	S100A9 Protein Aggregates Boost Hippocampal Glutamate Modifying Monoaminergic Neurochemistry: A Glutamate Antibody Sensitive Outcome on Alzheimer-like Memory Decline.	Pubmed	0.0007785	1	0.002026	0.02011	1	1	S100A9
Pubmed	16329825	[Gene expression of epidermal growth factor and epidermal growth factor receptor in oral lichen planus].	Pubmed	0.0007785	1	0.002026	0.02011	1	1	EGFR
Pubmed	29546681	Successful treatment with an EGFR tyrosine kinase inhibitor Afatinib in a patient with combined small-cell lung Cancer with EGFR mutation.	Pubmed	0.0007785	1	0.002026	0.02011	1	1	EGFR
Pubmed	18508859	EGFR regulation by microRNA in lung cancer: a rose by any other name ... is an increasingly complicated rose.	Pubmed	0.0007785	1	0.002026	0.02011	1	1	EGFR
Pubmed	26441207	Prognostic significance of the EGFR pathway in nasopharyngeal carcinoma: a systematic review and meta-analysis.	Pubmed	0.0007785	1	0.002026	0.02011	1	1	EGFR
Pubmed	23236348	EGFR gene variants are associated with specific somatic aberrations in glioma.	Pubmed	0.0007785	1	0.002026	0.02011	1	1	EGFR
Pubmed	3098775	Gonadotropin and thyrotropin alpha- and beta-subunit gene expression in normal and neoplastic tissues characterized using specific messenger ribonucleic acid hybridization probes.	Pubmed	0.0007785	1	0.002026	0.02011	1	1	CGB3
Pubmed	14556196	[Association of the polymorphism of platelet membrane glycoprotein I a gene with myocardial infarction].	Pubmed	0.0007785	1	0.002026	0.02011	1	1	ITGA2
Pubmed	12819035	Blockade of the EGF receptor induces a deranged chemokine expression in keratinocytes leading to enhanced skin inflammation.	Pubmed	0.0007785	1	0.002026	0.02011	1	1	EGFR
Pubmed	8314591	Human clusterin (CLI) maps to 8p21 in proximity to the lipoprotein lipase (LPL) gene.	Pubmed	0.0007785	1	0.002026	0.02011	1	1	CLU
Pubmed	16891806	Comparison of serum beta 2-microglobulin and 24 hour urinary creatinine clearance as a prognostic factor in multiple myeloma.	Pubmed	0.0007785	1	0.002026	0.02011	1	1	B2M
Pubmed	17409827	Combined analysis of molecular and clinical predictors of gefitinib activity in advanced non-small cell lung cancer: epidermal growth factor receptor mutations do not tell the whole story.	Pubmed	0.0007785	1	0.002026	0.02011	1	1	EGFR
Pubmed	19289586	Clusterin expression correlates with stage and presence of large cells in mycosis fungoides.	Pubmed	0.0007785	1	0.002026	0.02011	1	1	CLU
Pubmed	19347832	EGFR mutations are detected comparably in cytologic and surgical pathology specimens of nonsmall cell lung cancer.	Pubmed	0.0007785	1	0.002026	0.02011	1	1	EGFR
Pubmed	8356058	Ly-GDI, a GDP-dissociation inhibitor of the RhoA GTP-binding protein, is expressed preferentially in lymphocytes.	Pubmed	0.0007785	1	0.002026	0.02011	1	1	ARHGDIB
Pubmed	17175376	No association between dinucleotide repeat polymorphism in intron 1 of the epidermal growth factor receptor gene EGFR and risk of lung cancer.	Pubmed	0.0007785	1	0.002026	0.02011	1	1	EGFR
Pubmed	28800007	Comparison of Epidermal Growth Factor Receptor Gene Mutations Identified Using Pleural Effusion and Primary Tumor Tissue Samples in Non-Small Cell Lung Cancer.	Pubmed	0.0007785	1	0.002026	0.02011	1	1	EGFR
Pubmed	29291705	Differential efficacy of cisplatin plus pemetrexed between L858R and Del-19 in advanced EGFR-mutant non-squamous non-small cell lung cancer.	Pubmed	0.0007785	1	0.002026	0.02011	1	1	EGFR
Pubmed	17916163	Malaria protection in beta 2-microglobulin-deficient mice lacking major histocompatibility complex class I antigens: essential role of innate immunity, including gammadelta T cells.	Pubmed	0.0007785	1	0.002026	0.02011	1	1	B2M
Pubmed	18413752	Coordinated epidermal growth factor receptor pathway gene overexpression predicts epidermal growth factor receptor inhibitor sensitivity in pancreatic cancer.	Pubmed	0.0007785	1	0.002026	0.02011	1	1	EGFR
Pubmed	26436086	Missense Mutations in Exons 18-24 of EGFR in Hepatocellular Carcinoma Tissues.	Pubmed	0.0007785	1	0.002026	0.02011	1	1	EGFR
Pubmed	1549177	Susceptibility of beta 2-microglobulin-deficient mice to Trypanosoma cruzi infection.	Pubmed	0.0007785	1	0.002026	0.02011	1	1	B2M
Pubmed	16738552	The interactome of human EGF/ErbB receptors.	Pubmed	0.0007785	1	0.002026	0.02011	1	1	EGFR
Pubmed	17049467	Activation of Rac1 by Rho-guanine nucleotide dissociation inhibitor-beta with defective isoprenyl-binding pocket.	Pubmed	0.0007785	1	0.002026	0.02011	1	1	ARHGDIB
Pubmed	21824521	Plasma clusterin concentration is associated with longitudinal brain atrophy in mild cognitive impairment.	Pubmed	0.0007785	1	0.002026	0.02011	1	1	CLU
Pubmed	21127468	Urinary ?-2-microglobulin as an alternative marker for fetal inflammatory response and development of bronchopulmonary dysplasia in premature infants.	Pubmed	0.0007785	1	0.002026	0.02011	1	1	B2M
Pubmed	20534988	Epidermal growth factor receptor gene status by fluorescence in situ hybridization in malignant, atypical, and benign hidradenomas.	Pubmed	0.0007785	1	0.002026	0.02011	1	1	EGFR
Pubmed	4795659	Human chorionic gonadotropin. Linear amino acid sequence of the beta subunit.	Pubmed	0.0007785	1	0.002026	0.02011	1	1	CGB7
Pubmed	27587395	Epidermal Growth Factor Receptor Signaling Regulates ? Cell Proliferation in Adult Mice.	Pubmed	0.0007785	1	0.002026	0.02011	1	1	EGFR
Pubmed	17425591	Hypoxia increases the motility of lung adenocarcinoma cell line A549 via activation of the epidermal growth factor receptor pathway.	Pubmed	0.0007785	1	0.002026	0.02011	1	1	EGFR
Pubmed	10975810	TCR signaling for initiation and completion of thymocyte positive selection has distinct requirements for ligand quality and presenting cell type.	Pubmed	0.0007785	1	0.002026	0.02011	1	1	B2M
Pubmed	29577613	Molecular biological analysis in a patient with multiple lung adenocarcinomas.	Pubmed	0.0007785	1	0.002026	0.02011	1	1	EGFR
Pubmed	27481166	Macromolecular crowding favors the fibrillization of ?2-microglobulin by accelerating the nucleation step and inhibiting fibril disassembly.	Pubmed	0.0007785	1	0.002026	0.02011	1	1	B2M
Pubmed	20497247	Clusterin expression is associated with decreased disease-free survival of patients with colorectal carcinomas.	Pubmed	0.0007785	1	0.002026	0.02011	1	1	CLU
Pubmed	9685737	Dipeptidyl peptidase IV from human serum: purification, characterization, and N-terminal amino acid sequence.	Pubmed	0.0007785	1	0.002026	0.02011	1	1	DPP4
Pubmed	7780178	Clusterin expression within skin correlates with hair growth.	Pubmed	0.0007785	1	0.002026	0.02011	1	1	CLU
Pubmed	18413774	Gender-related survival differences associated with EGFR polymorphisms in metastatic colon cancer.	Pubmed	0.0007785	1	0.002026	0.02011	1	1	EGFR
Pubmed	25376513	EGFR mutation testing practices within the Asia Pacific region: results of a multicenter diagnostic survey.	Pubmed	0.0007785	1	0.002026	0.02011	1	1	EGFR
Pubmed	20351246	Elongated oligomers in beta2-microglobulin amyloid assembly revealed by ion mobility spectrometry-mass spectrometry.	Pubmed	0.0007785	1	0.002026	0.02011	1	1	B2M
Pubmed	17453292	Pancreatic cancer epidermal growth factor receptor (EGFR) intron 1 polymorphism influences postoperative patient survival and in vitro erlotinib response.	Pubmed	0.0007785	1	0.002026	0.02011	1	1	EGFR
Pubmed	23842642	Raloxifene reduces triple-negative breast cancer tumor growth and decreases EGFR expression.	Pubmed	0.0007785	1	0.002026	0.02011	1	1	EGFR
Pubmed	22412050	Epidermal growth factor receptor mutations in malignant pleural and peritoneal mesothelioma.	Pubmed	0.0007785	1	0.002026	0.02011	1	1	EGFR
Pubmed	13679383	HBsAg/HLA-A2 transgenic mice: a model for T cell tolerance to hepatitis B surface antigen in chronic hepatitis B virus infection.	Pubmed	0.0007785	1	0.002026	0.02011	1	1	B2M
Pubmed	22882128	Exon 8 amplification of epidermal growth factor receptor (EGFR) in invasive breast carcinomas.	Pubmed	0.0007785	1	0.002026	0.02011	1	1	EGFR
Pubmed	22707299	Analysis of driver mutations in female non-smoker Asian patients with pulmonary adenocarcinoma.	Pubmed	0.0007785	1	0.002026	0.02011	1	1	EGFR
Pubmed	19357365	Clusterin facilitates exchange of glycosyl phosphatidylinositol-linked SPAM1 between reproductive luminal fluids and mouse and human sperm membranes.	Pubmed	0.0007785	1	0.002026	0.02011	1	1	CLU
Pubmed	27585937	Association between DPP4 gene polymorphism and serum lipid levels in Chinese type 2 diabetes individuals.	Pubmed	0.0007785	1	0.002026	0.02011	1	1	DPP4
Pubmed	9731077	Evidence that CD31, CD49b, and CD62L are immunodominant minor histocompatibility antigens in HLA identical sibling bone marrow transplants.	Pubmed	0.0007785	1	0.002026	0.02011	1	1	ITGA2
Pubmed	8763423	Keratinocytes express dipeptidyl-peptidase IV (CD26) in benign and malignant skin diseases.	Pubmed	0.0007785	1	0.002026	0.02011	1	1	DPP4
Pubmed	26686534	Epidermal growth factor receptor overexpression is common and not correlated to gene copy number in ependymoma.	Pubmed	0.0007785	1	0.002026	0.02011	1	1	EGFR
Pubmed	18989463	Kinome-wide RNAi screen implicates at least 5 host hepatocyte kinases in Plasmodium sporozoite infection.	Pubmed	0.0007785	1	0.002026	0.02011	1	1	PRKCZ
Pubmed	25304234	EGFR and cyclin D1 in nodular melanoma: correlation with pathohistological parameters and overall survival.	Pubmed	0.0007785	1	0.002026	0.02011	1	1	EGFR
Pubmed	22036089	Establishing an EGFR mutation screening service for non-small cell lung cancer - sample quality criteria and candidate histological predictors.	Pubmed	0.0007785	1	0.002026	0.02011	1	1	EGFR
Pubmed	20887192	EGFR mutations and lung cancer.	Pubmed	0.0007785	1	0.002026	0.02011	1	1	EGFR
Pubmed	25156817	ARMS for EGFR mutation analysis of cytologic and corresponding lung adenocarcinoma histologic specimens.	Pubmed	0.0007785	1	0.002026	0.02011	1	1	EGFR
Pubmed	15534105	Prognostic value of ERM gene expression in human primary breast cancers.	Pubmed	0.0007785	1	0.002026	0.02011	1	1	ETV5
Pubmed	23468578	Epidermal growth factor receptor mutation in lung adenocarcinomas: relationship with CT characteristics and histologic subtypes.	Pubmed	0.0007785	1	0.002026	0.02011	1	1	EGFR
Pubmed	20303140	Epidermal growth factor receptor in glioblastomas: correlation between gene copy number and protein expression.	Pubmed	0.0007785	1	0.002026	0.02011	1	1	EGFR
Pubmed	22962574	Interleukin-6 induces S100A9 expression in colonic epithelial cells through STAT3 activation in experimental ulcerative colitis.	Pubmed	0.0007785	1	0.002026	0.02011	1	1	S100A9
Pubmed	12397069	Cholesterol depletion from the plasma membrane triggers ligand-independent activation of the epidermal growth factor receptor.	Pubmed	0.0007785	1	0.002026	0.02011	1	1	EGFR
Pubmed	16597832	Structure and dynamics of the epidermal growth factor receptor C-terminal phosphorylation domain.	Pubmed	0.0007785	1	0.002026	0.02011	1	1	EGFR
Pubmed	8798518	Investigation of glucose-dependent insulinotropic polypeptide-(1-42) and glucagon-like peptide-1-(7-36) degradation in vitro by dipeptidyl peptidase IV using matrix-assisted laser desorption/ionization-time of flight mass spectrometry. A novel kinetic approach.	Pubmed	0.0007785	1	0.002026	0.02011	1	1	DPP4
Pubmed	22579287	Oncogenic mutations counteract intrinsic disorder in the EGFR kinase and promote receptor dimerization.	Pubmed	0.0007785	1	0.002026	0.02011	1	1	EGFR
Pubmed	16140420	Mutations of epidermal growth factor receptor of non-small cell lung cancer were associated with sensitivity to gefitinib in recurrence after surgery.	Pubmed	0.0007785	1	0.002026	0.02011	1	1	EGFR
Pubmed	20007378	Structural analysis of the catalytically inactive kinase domain of the human EGF receptor 3.	Pubmed	0.0007785	1	0.002026	0.02011	1	1	EGFR
Pubmed	24760387	Prognostic and predictive role of epidermal growth factor receptor mutation in recurrent pulmonary adenocarcinoma after curative resection.	Pubmed	0.0007785	1	0.002026	0.02011	1	1	EGFR
Pubmed	18813793	Clusterin: a potential target for improving response to antiestrogens.	Pubmed	0.0007785	1	0.002026	0.02011	1	1	CLU
Pubmed	16140647	Glycoprotein Ia 807TT/873AA genotype is not associated with myocardial infarction.	Pubmed	0.0007785	1	0.002026	0.02011	1	1	ITGA2
Pubmed	9353312	Crystal structure of the I domain from integrin alpha2beta1.	Pubmed	0.0007785	1	0.002026	0.02011	1	1	ITGA2
Pubmed	1763388	Localization of the gene encoding the alpha 2 subunit of the human VLA-2 receptor to chromosome 5q23-31.	Pubmed	0.0007785	1	0.002026	0.02011	1	1	ITGA2
Pubmed	25350950	Circulating dipeptidyl peptidase-4 activity correlates with measures of hepatocyte apoptosis and fibrosis in non-alcoholic fatty liver disease in type 2 diabetes mellitus and obesity: A dual cohort cross-sectional study.	Pubmed	0.0007785	1	0.002026	0.02011	1	1	DPP4
Pubmed	21645456	[Discordance of epidermal growth factor receptor mutations between primary and corresponding metastatic tumors in non-small cell lung cancer].	Pubmed	0.0007785	1	0.002026	0.02011	1	1	EGFR
Pubmed	18443904	Increased epidermal growth factor receptor (EGFR) expression in malignant mammary phyllodes tumors.	Pubmed	0.0007785	1	0.002026	0.02011	1	1	EGFR
Pubmed	19088172	Comparison of epidermal growth factor receptor mutations between primary and corresponding metastatic tumors in tyrosine kinase inhibitor-naive non-small-cell lung cancer.	Pubmed	0.0007785	1	0.002026	0.02011	1	1	EGFR
Pubmed	18612545	Potential protective role of apoprotein J (clusterin) in atherogenesis: binding to enzymatically modified low-density lipoprotein reduces fatty acid-mediated cytotoxicity.	Pubmed	0.0007785	1	0.002026	0.02011	1	1	CLU
Pubmed	24378367	The role of clusterin in amyloid-?-associated neurodegeneration.	Pubmed	0.0007785	1	0.002026	0.02011	1	1	CLU
Pubmed	25135077	Calprotectin (S100A8/9) as serum biomarker for clinical response in proof-of-concept trials in axial and peripheral spondyloarthritis.	Pubmed	0.0007785	1	0.002026	0.02011	1	1	S100A9
Pubmed	10381815	Human granulosa cells express integrin alpha2 and collagen type IV: possible involvement of collagen type IV in granulosa cell luteinization.	Pubmed	0.0007785	1	0.002026	0.02011	1	1	ITGA2
Pubmed	28983601	PKC?, MMP?2 and MMP?9 expression in lung adenocarcinoma and association with a metastatic phenotype.	Pubmed	0.0007785	1	0.002026	0.02011	1	1	PRKCZ
Pubmed	28798270	A Phase I Dose-Escalation Study of the Safety and Pharmacokinetics of Pictilisib in Combination with Erlotinib in Patients with Advanced Solid Tumors.	Pubmed	0.0007785	1	0.002026	0.02011	1	1	EGFR
Pubmed	26249748	Assessment of high-sensitive methods for the detection of EGFR mutations in circulating free tumor DNA from NSCLC patients.	Pubmed	0.0007785	1	0.002026	0.02011	1	1	EGFR
Pubmed	17875767	Epidermal growth factor receptor mutation detection using high-resolution melting analysis predicts outcomes in patients with advanced non small cell lung cancer treated with gefitinib.	Pubmed	0.0007785	1	0.002026	0.02011	1	1	EGFR
Pubmed	23945389	Frequency and type of epidermal growth factor receptor mutations in moroccan patients with lung adenocarcinoma.	Pubmed	0.0007785	1	0.002026	0.02011	1	1	EGFR
Pubmed	8661127	Genomic organization of the human ERM (ETV5) gene, a PEA3 group member of ETS transcription factors.	Pubmed	0.0007785	1	0.002026	0.02011	1	1	ETV5
Pubmed	31558282	Epidermal growth factor receptor (EGFR) tyrosine kinase inhibitors in non-small cell lung cancer harboring uncommon EGFR mutations: Focus on afatinib.	Pubmed	0.0007785	1	0.002026	0.02011	1	1	EGFR
Pubmed	27317889	Epidermal growth factor receptor signaling mediates aldosterone-induced profibrotic responses in kidney.	Pubmed	0.0007785	1	0.002026	0.02011	1	1	EGFR
Pubmed	19859710	[Predictive EGFR gene analyses in cytology].	Pubmed	0.0007785	1	0.002026	0.02011	1	1	EGFR
Pubmed	27894601	Treatment Rationale and Study Design for the RELAY Study: A Multicenter, Randomized, Double-Blind Study of Erlotinib With Ramucirumab or Placebo in Patients With Epidermal Growth Factor Receptor Mutation-Positive Metastatic Non-Small-Cell Lung Cancer.	Pubmed	0.0007785	1	0.002026	0.02011	1	1	EGFR
Pubmed	21334594	Mutations in the TSPAN12 gene in Japanese patients with familial exudative vitreoretinopathy.	Pubmed	0.0007785	1	0.002026	0.02011	1	1	TSPAN12
Pubmed	9886510	Increased prevalence of luteinizing hormone beta-subunit variant in Japanese infertility patients.	Pubmed	0.0007785	1	0.002026	0.02011	1	1	LHB
Pubmed	17210462	Evaluation of radiolabeled ML04, a putative irreversible inhibitor of epidermal growth factor receptor, as a bioprobe for PET imaging of EGFR-overexpressing tumors.	Pubmed	0.0007785	1	0.002026	0.02011	1	1	EGFR
Pubmed	28184913	Determining EGFR-TKI sensitivity of G719X and other uncommon EGFR mutations in non-small cell lung cancer: Perplexity and solution (Review).	Pubmed	0.0007785	1	0.002026	0.02011	1	1	EGFR
Pubmed	26050023	The correlation between EGFR mutation status and the risk of brain metastasis in patients with lung adenocarcinoma.	Pubmed	0.0007785	1	0.002026	0.02011	1	1	EGFR
Pubmed	28831150	GLP-1/Exendin-4 induces ?-cell proliferation via the epidermal growth factor receptor.	Pubmed	0.0007785	1	0.002026	0.02011	1	1	EGFR
Pubmed	26181014	Association of EGFR L858R Mutation in Circulating Free DNA With Survival in the EURTAC Trial.	Pubmed	0.0007785	1	0.002026	0.02011	1	1	EGFR
Pubmed	15482488	EGFR enhances early healing after cutaneous incisional wounding.	Pubmed	0.0007785	1	0.002026	0.02011	1	1	EGFR
Pubmed	21593202	Dipeptidyl peptidase 4 is a novel adipokine potentially linking obesity to the metabolic syndrome.	Pubmed	0.0007785	1	0.002026	0.02011	1	1	DPP4
Pubmed	25730907	Inhibition of non-small cell lung cancer (NSCLC) growth by a novel small molecular inhibitor of EGFR.	Pubmed	0.0007785	1	0.002026	0.02011	1	1	EGFR
Pubmed	26101090	Mechanistic Insights into R776H Mediated Activation of Epidermal Growth Factor Receptor Kinase.	Pubmed	0.0007785	1	0.002026	0.02011	1	1	EGFR
Pubmed	27637087	Comparison of outcomes of tyrosine kinase inhibitor in first- or second-line therapy for advanced non-small-cell lung cancer patients with sensitive EGFR mutations.	Pubmed	0.0007785	1	0.002026	0.02011	1	1	EGFR
Pubmed	23265235	Epidermal growth factor receptor mutation study for 5 years, in a population of patients with non-small cell lung cancer.	Pubmed	0.0007785	1	0.002026	0.02011	1	1	EGFR
Pubmed	12835477	Presentation of exogenous antigens on major histocompatibility complex (MHC) class I and MHC class II molecules is differentially regulated during dendritic cell maturation.	Pubmed	0.0007785	1	0.002026	0.02011	1	1	B2M
Pubmed	17721266	Terminal respiratory unit type lung adenocarcinoma is associated with distinctive EGFR immunoreactivity and EGFR mutations.	Pubmed	0.0007785	1	0.002026	0.02011	1	1	EGFR
Pubmed	20375790	LyGDI is a promising biomarker for ovarian cancer.	Pubmed	0.0007785	1	0.002026	0.02011	1	1	ARHGDIB
Pubmed	9745505	Role of CD8+ and CD4+ T cells in the rejection of murine intestinal allografts.	Pubmed	0.0007785	1	0.002026	0.02011	1	1	B2M
Pubmed	26309162	Enhanced transfection efficiency and targeted delivery of self-assembling h-R3-dendriplexes in EGFR-overexpressing tumor cells.	Pubmed	0.0007785	1	0.002026	0.02011	1	1	EGFR
Pubmed	23628526	Nuclear EGFR protein expression predicts poor survival in early stage non-small cell lung cancer.	Pubmed	0.0007785	1	0.002026	0.02011	1	1	EGFR
Pubmed	15982419	Differential gene expression profile reveals deregulation of pregnancy specific beta1 glycoprotein 9 early during colorectal carcinogenesis.	Pubmed	0.0007785	1	0.002026	0.02011	1	1	PSG9
Pubmed	25768033	Highlights in NSCLC from the 2014 ASCO meeting.	Pubmed	0.0007785	1	0.002026	0.02011	1	1	EGFR
Pubmed	27649757	Relationship of clusterin with renal inflammation and fibrosis after the recovery phase of ischemia-reperfusion injury.	Pubmed	0.0007785	1	0.002026	0.02011	1	1	CLU
Pubmed	25213023	In solution cation-induced secondary and tertiary structure alterations of human calprotectin.	Pubmed	0.0007785	1	0.002026	0.02011	1	1	S100A9
Pubmed	15185972	The role of beta2 microglobulin levels in monitoring chronic hepatitis B.	Pubmed	0.0007785	1	0.002026	0.02011	1	1	B2M
Pubmed	26722512	Comparison of EGFR mutation status between plasma and tumor tissue in non-small cell lung cancer using the Scorpion ARMS method and the possible prognostic significance of plasma EGFR mutation status.	Pubmed	0.0007785	1	0.002026	0.02011	1	1	EGFR
Pubmed	26370256	Prognostic relevance of stromal CD26 expression in rectal cancer after chemoradiotherapy.	Pubmed	0.0007785	1	0.002026	0.02011	1	1	DPP4
Pubmed	27881421	Common Variant in Glycoprotein Ia Increases Long-Term Adverse Events Risk After Coronary Artery Bypass Graft Surgery.	Pubmed	0.0007785	1	0.002026	0.02011	1	1	ITGA2
Pubmed	25216867	Lifestyle risks exposure and response predictor of gefitinib in patients with non-small cell lung cancer.	Pubmed	0.0007785	1	0.002026	0.02011	1	1	EGFR
Pubmed	26653550	Diagnostic importance of S100A9 and S100A12 in breast cancer.	Pubmed	0.0007785	1	0.002026	0.02011	1	1	S100A9
Pubmed	10339462	The alpha2 gene coding sequence T807/A873 of the platelet collagen receptor integrin alpha2beta1 might be a genetic risk factor for the development of stroke in younger patients.	Pubmed	0.0007785	1	0.002026	0.02011	1	1	ITGA2
Pubmed	7529286	NK cell response to viral infections in beta 2-microglobulin-deficient mice.	Pubmed	0.0007785	1	0.002026	0.02011	1	1	B2M
Pubmed	25546405	Identification of S100A9 as biomarker of responsiveness to the methotrexate/etanercept combination in rheumatoid arthritis using a proteomic approach.	Pubmed	0.0007785	1	0.002026	0.02011	1	1	S100A9
Pubmed	28737011	A distinctive patchy osteomalacia characterises Phospho1-deficient mice.	Pubmed	0.0007785	1	0.002026	0.02011	1	1	PHOSPHO1
Pubmed	23387505	Sensitivity and kinase activity of epidermal growth factor receptor (EGFR) exon 19 and others to EGFR-tyrosine kinase inhibitors.	Pubmed	0.0007785	1	0.002026	0.02011	1	1	EGFR
Pubmed	12594819	Expression of the free beta-subunit of human chorionic gonadotropin in renal cell carcinoma: prognostic study on tissue and serum.	Pubmed	0.0007785	1	0.002026	0.02011	1	1	CGB3
Pubmed	21778168	Nomogram to predict the presence of EGFR activating mutation in lung adenocarcinoma.	Pubmed	0.0007785	1	0.002026	0.02011	1	1	EGFR
Pubmed	18538760	Pharmacokinetic, pharmacodynamic, and efficacy profiles of alogliptin, a novel inhibitor of dipeptidyl peptidase-4, in rats, dogs, and monkeys.	Pubmed	0.0007785	1	0.002026	0.02011	1	1	DPP4
Pubmed	16011858	Mutations in the tyrosine kinase domain of the EGFR gene associated with gefitinib response in non-small-cell lung cancer.	Pubmed	0.0007785	1	0.002026	0.02011	1	1	EGFR
Pubmed	25334070	Restoration of miR-7 expression suppresses the growth of Lewis lung cancer cells by modulating epidermal growth factor receptor signaling.	Pubmed	0.0007785	1	0.002026	0.02011	1	1	EGFR
Pubmed	24105277	Rebiopsy of non-small cell lung cancer patients with acquired resistance to epidermal growth factor receptor-tyrosine kinase inhibitor: Comparison between T790M mutation-positive and mutation-negative populations.	Pubmed	0.0007785	1	0.002026	0.02011	1	1	EGFR
Pubmed	15623594	High frequency of epidermal growth factor receptor mutations with complex patterns in non-small cell lung cancers related to gefitinib responsiveness in Taiwan.	Pubmed	0.0007785	1	0.002026	0.02011	1	1	EGFR
Pubmed	26780337	Radiographic patterns and survival of patients with early and late brain metastases in EGFR wild type and mutant non small cell lung cancer.	Pubmed	0.0007785	1	0.002026	0.02011	1	1	EGFR
Pubmed	19446882	A novel mutation in the complement regulator clusterin in recurrent hemolytic uremic syndrome.	Pubmed	0.0007785	1	0.002026	0.02011	1	1	CLU
Pubmed	23993733	Phase II study of pemetrexed plus intermittent erlotinib combination therapy for pretreated advanced non-squamous non-small cell lung cancer with documentation of epidermal growth factor receptor mutation status.	Pubmed	0.0007785	1	0.002026	0.02011	1	1	EGFR
Pubmed	23575414	Results of the First Italian External Quality Assurance Scheme for somatic EGFR mutation testing in non-small-cell lung cancer.	Pubmed	0.0007785	1	0.002026	0.02011	1	1	EGFR
Pubmed	15556605	Sphingosine 1-phosphate transactivates c-Met as well as epidermal growth factor receptor (EGFR) in human gastric cancer cells.	Pubmed	0.0007785	1	0.002026	0.02011	1	1	EGFR
Pubmed	20850846	Association of the clusterin gene polymorphisms with type 2 diabetes mellitus.	Pubmed	0.0007785	1	0.002026	0.02011	1	1	CLU
Pubmed	22822112	Serum and urinary concentrations of calprotectin as markers of insulin resistance and type 2 diabetes.	Pubmed	0.0007785	1	0.002026	0.02011	1	1	S100A9
Pubmed	12412731	Association of the platelet glycoprotein Ia C807T/G873A gene polymorphism and thrombosis in Behτet patients.	Pubmed	0.0007785	1	0.002026	0.02011	1	1	ITGA2
Pubmed	25792636	Myeloid-related protein-14 deficiency promotes inflammation in staphylococcal pneumonia.	Pubmed	0.0007785	1	0.002026	0.02011	1	1	S100A9
Pubmed	27370697	Comparison of plasma and tissue samples in epidermal growth factor receptor mutation by ARMS in advanced non-small cell lung cancer.	Pubmed	0.0007785	1	0.002026	0.02011	1	1	EGFR
Pubmed	21380506	Local calprotectin production in colorectal cancer and polyps--active neutrophil recruitment in carcinogenesis.	Pubmed	0.0007785	1	0.002026	0.02011	1	1	S100A9
Pubmed	28730709	The role of the cytopathologist in subtyping and epidermal growth factor receptor testing in non-small cell lung cancer: An institutional experience.	Pubmed	0.0007785	1	0.002026	0.02011	1	1	EGFR
Pubmed	20840812	[Detection of epidermal growth factor receptor mutations in non-small cell lung cancer tumor specimens from various ways by denaturing high-performance liquid chromatography].	Pubmed	0.0007785	1	0.002026	0.02011	1	1	EGFR
Pubmed	21343351	Involvement of epidermal growth factor receptor-linked signaling responses in Pseudomonas fluorescens-infected alveolar epithelial cells.	Pubmed	0.0007785	1	0.002026	0.02011	1	1	EGFR
Pubmed	19276369	Functional genomic analysis identified epidermal growth factor receptor activation as the most common genetic event in oral squamous cell carcinoma.	Pubmed	0.0007785	1	0.002026	0.02011	1	1	EGFR
Pubmed	16453019	Blocking airway mucous cell metaplasia by inhibiting EGFR antiapoptosis and IL-13 transdifferentiation signals.	Pubmed	0.0007785	1	0.002026	0.02011	1	1	EGFR
Pubmed	25227801	Distribution of EGFR mutations commonly observed in primary lung adenocarcinomas in Pakistan as predictors for targeted therapy.	Pubmed	0.0007785	1	0.002026	0.02011	1	1	EGFR
Pubmed	24480432	Choriogonadotropin positive seminoma-a clinicopathological and molecular genetic study of 15 cases.	Pubmed	0.0007785	1	0.002026	0.02011	1	1	CGB3
Pubmed	26583948	Small Molecule T315 Promotes Casitas B-Lineage Lymphoma-Dependent Degradation of Epidermal Growth Factor Receptor via Y1045 Autophosphorylation.	Pubmed	0.0007785	1	0.002026	0.02011	1	1	EGFR
Pubmed	27459393	Cytokine secreted by S100A9 via TLR4 in monocytes delays neutrophil apoptosis by inhibition of caspase 9/3 pathway.	Pubmed	0.0007785	1	0.002026	0.02011	1	1	S100A9
Pubmed	20734923	EGFR signaling is differentially activated in patient-derived glioblastoma stem cells.	Pubmed	0.0007785	1	0.002026	0.02011	1	1	EGFR
Pubmed	23099883	Small interfering RNA targeted to secretory clusterin blocks tumor growth, motility, and invasion in breast cancer.	Pubmed	0.0007785	1	0.002026	0.02011	1	1	CLU
Pubmed	16817235	In vivo modulation of epidermal growth factor receptor phosphorylation in mice expressing different gangliosides.	Pubmed	0.0007785	1	0.002026	0.02011	1	1	EGFR
Pubmed	9182567	Purification, cDNA cloning, and characterization of a new serpin with megakaryocyte maturation activity.	Pubmed	0.0007785	1	0.002026	0.02011	1	1	SERPINB7
Pubmed	29101518	Phase1 study of cisplatin plus pemetrexed with erlotinib and bevacizumab for chemotherapy-na∩ve advanced non-squamous non-small cell lung cancer with EGFR mutations.	Pubmed	0.0007785	1	0.002026	0.02011	1	1	EGFR
Pubmed	21455841	Epidermal growth factor receptor gene expression in high grade gliomas.	Pubmed	0.0007785	1	0.002026	0.02011	1	1	EGFR
Pubmed	12690074	The crystal structure of dipeptidyl peptidase IV (CD26) reveals its functional regulation and enzymatic mechanism.	Pubmed	0.0007785	1	0.002026	0.02011	1	1	DPP4
Pubmed	17473659	Epidermal growth factor receptor mutations and their correlation with gefitinib therapy in patients with non-small cell lung cancer: a meta-analysis based on updated individual patient data from six medical centers in mainland China.	Pubmed	0.0007785	1	0.002026	0.02011	1	1	EGFR
Pubmed	26015401	Highly sensitive and quantitative evaluation of the EGFR T790M mutation by nanofluidic digital PCR.	Pubmed	0.0007785	1	0.002026	0.02011	1	1	EGFR
Pubmed	24997986	Whole-exome and targeted gene sequencing of gallbladder carcinoma identifies recurrent mutations in the ErbB pathway.	Pubmed	0.0007785	1	0.002026	0.02011	1	1	EGFR
Pubmed	26810527	Clusterin CSF levels in differential diagnosis of neurodegenerative disorders.	Pubmed	0.0007785	1	0.002026	0.02011	1	1	CLU
Pubmed	29297467	Expansion of a CD26low Effector TH Subset and Reduction in Circulating Levels of sCD26 in Stable Allergic Asthma in Adults.	Pubmed	0.0007785	1	0.002026	0.02011	1	1	DPP4
Pubmed	8432869	Lack of HLA class I antigen expression by melanoma cells SK-MEL-33 caused by a reading frameshift in beta 2-microglobulin messenger RNA.	Pubmed	0.0007785	1	0.002026	0.02011	1	1	B2M
Pubmed	27668938	Dietary zinc alters the microbiota and decreases resistance to Clostridium difficile infection.	Pubmed	0.0007785	1	0.002026	0.02011	1	1	S100A9
Pubmed	10744142	The impact of the glycoprotein Ia collagen receptor subunit A1648G gene polymorphism on coronary artery disease and acute myocardial infarction.	Pubmed	0.0007785	1	0.002026	0.02011	1	1	ITGA2
Pubmed	12733059	TPA-induced signal transduction: a link between PKC and EGFR signaling modulates the assembly of intercellular junctions in Caco-2 cells.	Pubmed	0.0007785	1	0.002026	0.02011	1	1	EGFR
Pubmed	17211865	Expression of epidermal growth factor receptor in esophageal and esophagogastric junction adenocarcinomas: association with poor outcome.	Pubmed	0.0007785	1	0.002026	0.02011	1	1	EGFR
Pubmed	26318108	Increased plasma dipeptidyl peptidase-4 activities are associated with high prevalence of subclinical atherosclerosis in Chinese patients with newly diagnosed type 2 diabetes: a cross-sectional study.	Pubmed	0.0007785	1	0.002026	0.02011	1	1	DPP4
Pubmed	27148688	Clusterin facilitates apoptotic cell clearance and prevents apoptotic cell-induced autoimmune responses.	Pubmed	0.0007785	1	0.002026	0.02011	1	1	CLU
Pubmed	28129709	Profile of the Roche cobas« EGFR mutation test v2 for non-small cell lung cancer.	Pubmed	0.0007785	1	0.002026	0.02011	1	1	EGFR
Pubmed	27152417	EGFR Interacts with the Fusion Protein of Respiratory Syncytial Virus Strain 2-20 and Mediates Infection and Mucin Expression.	Pubmed	0.0007785	1	0.002026	0.02011	1	1	EGFR
Pubmed	27507810	Activation of Epidermal Growth Factor Receptor in Macrophages Mediates Feedback Inhibition of M2 Polarization and Gastrointestinal Tumor Cell Growth.	Pubmed	0.0007785	1	0.002026	0.02011	1	1	EGFR
Pubmed	23897120	CD49b-dependent establishment of T helper cell memory.	Pubmed	0.0007785	1	0.002026	0.02011	1	1	ITGA2
Pubmed	21220305	Atomic structure of a nanobody-trapped domain-swapped dimer of an amyloidogenic beta2-microglobulin variant.	Pubmed	0.0007785	1	0.002026	0.02011	1	1	B2M
Pubmed	5344599	Mouse chimaeras derived from fusion of embryos differing by nine genetic factors.	Pubmed	0.0007785	1	0.002026	0.02011	1	1	EGFR
Pubmed	24819665	Epidermal growth factor receptor (EGFR) pathway genes and interstitial lung disease: an association study.	Pubmed	0.0007785	1	0.002026	0.02011	1	1	EGFR
Pubmed	30521373	MicroRNA-129-5p is regulated by choline availability and controls EGF receptor synthesis and neurogenesis in the cerebral cortex.	Pubmed	0.0007785	1	0.002026	0.02011	1	1	EGFR
Pubmed	1347959	LCMV-specific, class II-restricted cytotoxic T cells in beta 2-microglobulin-deficient mice.	Pubmed	0.0007785	1	0.002026	0.02011	1	1	B2M
Pubmed	27069157	Phase II Study of Carboplatin and Pemetrexed in Advanced EGFR-wild-type Non-squamous Non-small Cell Lung Cancer: The Central Japan Lung Study Group Trial 0906.	Pubmed	0.0007785	1	0.002026	0.02011	1	1	EGFR
Pubmed	20976233	S100A8/A9 is not involved in host defense against murine urinary tract infection.	Pubmed	0.0007785	1	0.002026	0.02011	1	1	S100A9
Pubmed	26387039	Gefitinib Combined With Standard Chemoradiotherapy in EGFR-Mutant Locally Advanced Non-Small-Cell Lung Cancer: The LOGIK0902/OLCSG0905 Intergroup Study Protocol.	Pubmed	0.0007785	1	0.002026	0.02011	1	1	EGFR
Pubmed	18286687	Frequent mutations of the CA simple sequence repeat in intron 1 of EGFR in mismatch repair-deficient colorectal cancers.	Pubmed	0.0007785	1	0.002026	0.02011	1	1	EGFR
Pubmed	8483910	Mice lacking major histocompatibility complex class I and class II molecules.	Pubmed	0.0007785	1	0.002026	0.02011	1	1	B2M
Pubmed	17913857	Inhibitory activity of cetuximab on epidermal growth factor receptor mutations in non small cell lung cancers.	Pubmed	0.0007785	1	0.002026	0.02011	1	1	EGFR
Pubmed	29887244	Case report of three EGFR TKI na∩ve lung adenocarcinoma containing double EGFR mutations (L858R/T790M or Exon 19 Deletion/T790M); Comparing genetic information and histology.	Pubmed	0.0007785	1	0.002026	0.02011	1	1	EGFR
Pubmed	12653106	Epidermal growth factor receptor polymorphism and autosomal dominant polycystic kidney disease.	Pubmed	0.0007785	1	0.002026	0.02011	1	1	EGFR
Pubmed	26785607	Compound EGFR mutation is frequently detected with co-mutations of actionable genes and associated with poor clinical outcome in lung adenocarcinoma.	Pubmed	0.0007785	1	0.002026	0.02011	1	1	EGFR
Pubmed	9551889	Suppression of immune responses by CD8 cells. II. Qa-1 on activated B cells stimulates CD8 cell suppression of T helper 2 responses.	Pubmed	0.0007785	1	0.002026	0.02011	1	1	B2M
Pubmed	23721103	Detection of epidermal growth factor receptor T790M mutation in plasma DNA from patients refractory to epidermal growth factor receptor tyrosine kinase inhibitor.	Pubmed	0.0007785	1	0.002026	0.02011	1	1	EGFR
Pubmed	30400855	Case report: primary resistance to osimertinib in erlotinib-pretreated lung adenocarcinoma with EGFR T790áM mutation.	Pubmed	0.0007785	1	0.002026	0.02011	1	1	EGFR
Pubmed	17826660	RhoGDI2: a new metastasis suppressor gene: discovery and clinical translation.	Pubmed	0.0007785	1	0.002026	0.02011	1	1	ARHGDIB
Pubmed	25286755	Immunohistochemistry with a novel mutation-specific monoclonal antibody as a screening tool for the EGFR L858R mutational status in primary lung adenocarcinoma.	Pubmed	0.0007785	1	0.002026	0.02011	1	1	EGFR
Pubmed	19366827	Mutation-specific antibodies for the detection of EGFR mutations in non-small-cell lung cancer.	Pubmed	0.0007785	1	0.002026	0.02011	1	1	EGFR
Pubmed	7561688	Spontaneous inflammatory arthritis in HLA-B27 transgenic mice lacking beta 2-microglobulin: a model of human spondyloarthropathies.	Pubmed	0.0007785	1	0.002026	0.02011	1	1	B2M
Pubmed	21976538	Quantitative detection of EGFR mutations in circulating tumor DNA derived from lung adenocarcinomas.	Pubmed	0.0007785	1	0.002026	0.02011	1	1	EGFR
Pubmed	12042273	Lack of association of the common immunologically anomalous LH with endometriosis.	Pubmed	0.0007785	1	0.002026	0.02011	1	1	LHB
Pubmed	22238366	Ponatinib (AP24534), a multitargeted pan-FGFR inhibitor with activity in multiple FGFR-amplified or mutated cancer models.	Pubmed	0.0007785	1	0.002026	0.02011	1	1	EGFR
Pubmed	25154973	Identification of EGFR expression status association with metastatic lymph node density (ND) by expression microarray analysis of advanced gastric cancer.	Pubmed	0.0007785	1	0.002026	0.02011	1	1	EGFR
Pubmed	18186271	[Molecular targeted therapy and tailor-made therapy for lung cancer].	Pubmed	0.0007785	1	0.002026	0.02011	1	1	EGFR
Pubmed	25421919	The prevalence of EGFR mutations in non-small cell lung cancer in an unselected Caucasian population.	Pubmed	0.0007785	1	0.002026	0.02011	1	1	EGFR
Pubmed	23979198	Clinicopathologic features of non-small cell lung cancer in India and correlation with epidermal growth factor receptor mutational status.	Pubmed	0.0007785	1	0.002026	0.02011	1	1	EGFR
Pubmed	26788548	Downregulation of S100 Calcium Binding Protein A9 in Esophageal Squamous Cell Carcinoma.	Pubmed	0.0007785	1	0.002026	0.02011	1	1	S100A9
Pubmed	19204207	Randomized phase II trial of erlotinib versus temozolomide or carmustine in recurrent glioblastoma: EORTC brain tumor group study 26034.	Pubmed	0.0007785	1	0.002026	0.02011	1	1	EGFR
Pubmed	7489711	Expression of a dominant negative mutant of epidermal growth factor receptor in the epidermis of transgenic mice elicits striking alterations in hair follicle development and skin structure.	Pubmed	0.0007785	1	0.002026	0.02011	1	1	EGFR
Pubmed	21605009	EGFR upregulates inflammatory and proliferative responses in human lung adenocarcinoma cell line (A549), induced by lower dose of cadmium chloride.	Pubmed	0.0007785	1	0.002026	0.02011	1	1	EGFR
Pubmed	30365122	Vorinostat enhances gefitinib?induced cell death through reactive oxygen species?dependent cleavage of HSP90 and its clients in non?small cell lung cancer with the EGFR mutation.	Pubmed	0.0007785	1	0.002026	0.02011	1	1	EGFR
Pubmed	27881077	Sex difference in EGFR pathways in mouse kidney-potential impact on the immune system.	Pubmed	0.0007785	1	0.002026	0.02011	1	1	EGFR
Pubmed	19879420	Clusterin (CLU) and prostate cancer.	Pubmed	0.0007785	1	0.002026	0.02011	1	1	CLU
Pubmed	23648836	Oligomeric states along the folding pathways of ?2-microglobulin: kinetics, thermodynamics, and structure.	Pubmed	0.0007785	1	0.002026	0.02011	1	1	B2M
Pubmed	24614195	Tapasin modification on the intracellular epitope HBcAg18-27 enhances HBV-specific CTL immune response and inhibits hepatitis B virus replication in vivo.	Pubmed	0.0007785	1	0.002026	0.02011	1	1	B2M
Pubmed	29357321	B Subunit of Human Chorionic Gonadotropin Promotes Tumor Invasion and Predicts Poor Prognosis of Early-Stage Colorectal Cancer.	Pubmed	0.0007785	1	0.002026	0.02011	1	1	CGB3
Pubmed	14618611	Clusterin (SGP-2, ApoJ) expression is downregulated in low- and high-grade human prostate cancer.	Pubmed	0.0007785	1	0.002026	0.02011	1	1	CLU
Pubmed	9485216	Beta2-microglobulin-deficient NK cells show increased sensitivity to MHC class I-mediated inhibition, but self tolerance does not depend upon target cell expression of H-2Kb and Db heavy chains.	Pubmed	0.0007785	1	0.002026	0.02011	1	1	B2M
Pubmed	23404504	A pathophysiologic role for epidermal growth factor receptor in pemphigus acantholysis.	Pubmed	0.0007785	1	0.002026	0.02011	1	1	EGFR
Pubmed	17492130	Crystal structures of human dipeptidyl peptidase IV in its apo and diprotin B-complexed forms.	Pubmed	0.0007785	1	0.002026	0.02011	1	1	DPP4
Pubmed	21467228	Relationship between epidermal growth factor receptor status, p16(INK4A), and outcome in head and neck squamous cell carcinoma.	Pubmed	0.0007785	1	0.002026	0.02011	1	1	EGFR
Pubmed	16955214	Clusterin/Apolipoprotein J up-regulation after zinc exposure, replicative senescence or differentiation of human haematopoietic cells.	Pubmed	0.0007785	1	0.002026	0.02011	1	1	CLU
Pubmed	22296908	Association study of clusterin polymorphism rs11136000 with late onset Alzheimer's disease in Chinese Han population.	Pubmed	0.0007785	1	0.002026	0.02011	1	1	CLU
Pubmed	20156777	Non-small-cell lung cancer harbouring mutations in the EGFR kinase domain.	Pubmed	0.0007785	1	0.002026	0.02011	1	1	EGFR
Pubmed	24064546	Overexpression of S100A9 in human glioma and in-vitro inhibition by aspirin.	Pubmed	0.0007785	1	0.002026	0.02011	1	1	S100A9
Pubmed	23219738	Serum levels of advanced glycation end products (AGEs) are independently correlated with circulating levels of dipeptidyl peptidase-4 (DPP-4) in humans.	Pubmed	0.0007785	1	0.002026	0.02011	1	1	DPP4
Pubmed	25843712	NF-?B-activating complex engaged in response to EGFR oncogene inhibition drives tumor cell survival and residual disease in lung cancer.	Pubmed	0.0007785	1	0.002026	0.02011	1	1	EGFR
Pubmed	6188162	Linkage of beta 2-microglobulin and ly-m11 by molecular cloning and DNA-mediated gene transfer.	Pubmed	0.0007785	1	0.002026	0.02011	1	1	B2M
Pubmed	22770632	Association of epidermal growth factor receptor gene polymorphisms with advanced endometriosis in a Korean population.	Pubmed	0.0007785	1	0.002026	0.02011	1	1	EGFR
Pubmed	19754160	Copper binding to beta-2-microglobulin and its pre-amyloid oligomers.	Pubmed	0.0007785	1	0.002026	0.02011	1	1	B2M
Pubmed	21400669	EGFR gene status in cytological samples of nonsmall cell lung carcinoma: controversies and opportunities.	Pubmed	0.0007785	1	0.002026	0.02011	1	1	EGFR
Pubmed	29556606	Preselection of EGFR mutations in non-small-cell lung cancer patients by immunohistochemistry: comparison with DNA-sequencing, EGFR wild-type expression, gene copy number gain and clinicopathological data.	Pubmed	0.0007785	1	0.002026	0.02011	1	1	EGFR
Pubmed	26242487	PET of EGFR with (64) Cu-cetuximab-F(ab')2 in mice with head and neck squamous cell carcinoma xenografts.	Pubmed	0.0007785	1	0.002026	0.02011	1	1	EGFR
Pubmed	27490967	Structural Models for the Design of PKMzeta Inhibitors with Neurobiological Indications.	Pubmed	0.0007785	1	0.002026	0.02011	1	1	PRKCZ
Pubmed	19351766	RhoGDI2 expression is associated with tumor growth and malignant progression of gastric cancer.	Pubmed	0.0007785	1	0.002026	0.02011	1	1	ARHGDIB
Pubmed	26889022	Differential Expression of the Middle East Respiratory Syndrome Coronavirus Receptor in the Upper Respiratory Tracts of Humans and Dromedary Camels.	Pubmed	0.0007785	1	0.002026	0.02011	1	1	DPP4
Pubmed	26242913	Phosphorylation-induced Conformational Ensemble Switching in an Intrinsically Disordered Cancer/Testis Antigen.	Pubmed	0.0007785	1	0.002026	0.02011	1	1	PAGE4
Pubmed	25514804	Phase II study of afatinib, an irreversible ErbB family blocker, in EGFR FISH-positive non-small-cell lung cancer.	Pubmed	0.0007785	1	0.002026	0.02011	1	1	EGFR
Pubmed	29970656	The features and prognostic impact of extracranial metastases in patients with epidermal growth factor receptor-mutant lung adenocarcinoma.	Pubmed	0.0007785	1	0.002026	0.02011	1	1	EGFR
Pubmed	26051627	Dipeptidylpeptidase 4 (DPP4, CD26) activity in the blood serum of term and preterm neonates with cerebral ischemia.	Pubmed	0.0007785	1	0.002026	0.02011	1	1	DPP4
Pubmed	25421240	Epidermal growth factor receptor transactivation is required for mitogen-activated protein kinase activation by muscarinic acetylcholine receptors in HaCaT keratinocytes.	Pubmed	0.0007785	1	0.002026	0.02011	1	1	EGFR
Pubmed	7240231	Assignment of disulfide bonds in the beta subunit of human chorionic gonadotropin.	Pubmed	0.0007785	1	0.002026	0.02011	1	1	CGB7
Pubmed	12634639	Dipeptidyl peptidase IV expression in endometrial endometrioid adenocarcinoma and its inverse correlation with tumor grade.	Pubmed	0.0007785	1	0.002026	0.02011	1	1	DPP4
Pubmed	12879076	Epidermal growth factor receptor is a cellular receptor for human cytomegalovirus.	Pubmed	0.0007785	1	0.002026	0.02011	1	1	EGFR
Pubmed	19187446	Reduction of protein kinase C zeta inhibits migration and invasion of human glioblastoma cells.	Pubmed	0.0007785	1	0.002026	0.02011	1	1	PRKCZ
Pubmed	30950030	[Association of EGFR gene G719S and T790M mutations with cervical cancer].	Pubmed	0.0007785	1	0.002026	0.02011	1	1	EGFR
Pubmed	15540509	Epidermal growth factor receptor (EGFR) gene Bsr I polymorphism is associated with systemic lupus erythematosus.	Pubmed	0.0007785	1	0.002026	0.02011	1	1	EGFR
Pubmed	8627161	Selective development of T helper (Th)2 cells induced by continuous administration of low dose soluble proteins to normal and beta(2)-microglobulin-deficient BALB/c mice.	Pubmed	0.0007785	1	0.002026	0.02011	1	1	B2M
Pubmed	11829319	Genetic variant of luteinizing hormone: impact on gonadal steroid sex hormones in women.	Pubmed	0.0007785	1	0.002026	0.02011	1	1	LHB
Pubmed	17766066	Cause-specific mortality and cancer incidence rates in relation to urinary beta2-microglobulin: 23-year follow-up study in a cadmium-polluted area.	Pubmed	0.0007785	1	0.002026	0.02011	1	1	B2M
Pubmed	24867389	Multigene mutational profiling of cholangiocarcinomas identifies actionable molecular subgroups.	Pubmed	0.0007785	1	0.002026	0.02011	1	1	EGFR
Pubmed	21314441	?2-microglobulin, a novel biomarker of peripheral arterial disease, independently predicts aortic stiffness in these patients.	Pubmed	0.0007785	1	0.002026	0.02011	1	1	B2M
Pubmed	17468034	Association of epidermal growth factor receptor (EGFR) gene copy number amplification with neck lymph node metastasis in areca-associated oral carcinomas.	Pubmed	0.0007785	1	0.002026	0.02011	1	1	EGFR
Pubmed	15009100	Antipsoriatic drug anthralin induces EGF receptor phosphorylation in keratinocytes: requirement for H(2)O(2) generation.	Pubmed	0.0007785	1	0.002026	0.02011	1	1	EGFR
Pubmed	27750395	Synonymous EGFR variant p.Q787Q is neither prognostic nor predictive in patients with lung adenocarcinoma.	Pubmed	0.0007785	1	0.002026	0.02011	1	1	EGFR
Pubmed	18083120	Epidermal growth factor (EGF) receptor targeted delivery of PEGylated adenovirus.	Pubmed	0.0007785	1	0.002026	0.02011	1	1	EGFR
Pubmed	18379370	Lung adenocarcinoma with good response to erlotinib after gefitinib treatment failure and acquired T790M mutation.	Pubmed	0.0007785	1	0.002026	0.02011	1	1	EGFR
Pubmed	12642595	Growth hormone-induced phosphorylation of epidermal growth factor (EGF) receptor in 3T3-F442A cells. Modulation of EGF-induced trafficking and signaling.	Pubmed	0.0007785	1	0.002026	0.02011	1	1	EGFR
Pubmed	23684791	Sustained activation of EGFR triggers renal fibrogenesis after acute kidney injury.	Pubmed	0.0007785	1	0.002026	0.02011	1	1	EGFR
Pubmed	16033132	Chromogenic in situ hybridization accurately identifies EGFR amplification in small cell glioblastoma multiforme, a common subtype of primary GBM.	Pubmed	0.0007785	1	0.002026	0.02011	1	1	EGFR
Pubmed	15956035	The EGFR mutation and its correlation with response of gefitinib in previously treated Chinese patients with advanced non-small-cell lung cancer.	Pubmed	0.0007785	1	0.002026	0.02011	1	1	EGFR
Pubmed	18097577	Involvement of EGFR in the response of squamous cell carcinoma of the head and neck cell lines to gefitinib.	Pubmed	0.0007785	1	0.002026	0.02011	1	1	EGFR
Pubmed	16503085	Epidermal growth factor receptor gene mutation defines distinct subsets among small adenocarcinomas of the lung.	Pubmed	0.0007785	1	0.002026	0.02011	1	1	EGFR
Pubmed	27079858	Clusterin immunoexpression is associated with early stage endometrial carcinomas.	Pubmed	0.0007785	1	0.002026	0.02011	1	1	CLU
Pubmed	23682690	Identification of a novel splicing mutation of ECM1 in a rare lipoid proteinosis family.	Pubmed	0.0007785	1	0.002026	0.02011	1	1	ECM1
Pubmed	28887632	Multipeptide-coupled nanoparticles induce tolerance in 'humanised' HLA-transgenic mice and inhibit diabetogenic CD8	Pubmed	0.0007785	1	0.002026	0.02011	1	1	B2M
Pubmed	22173705	Association between tumor epidermal growth factor receptor mutation and pulmonary tuberculosis in patients with adenocarcinoma of the lungs.	Pubmed	0.0007785	1	0.002026	0.02011	1	1	EGFR
Pubmed	18025070	Antitumor mechanisms of systemically administered epidermal growth factor receptor antisense oligonucleotides in combination with docetaxel in squamous cell carcinoma of the head and neck.	Pubmed	0.0007785	1	0.002026	0.02011	1	1	EGFR
Pubmed	22354032	Involvement of host cell integrin ?2 in Cryptosporidium parvum infection.	Pubmed	0.0007785	1	0.002026	0.02011	1	1	ITGA2
Pubmed	24947876	CLU rs2279590 polymorphism contributes to Alzheimer's disease susceptibility in Caucasian and Asian populations.	Pubmed	0.0007785	1	0.002026	0.02011	1	1	CLU
Pubmed	21052000	Mapping EGFR1 mutations in patients with lung adenocarcinoma.	Pubmed	0.0007785	1	0.002026	0.02011	1	1	EGFR
Pubmed	22949266	CD26: a negative selection marker for human Treg cells.	Pubmed	0.0007785	1	0.002026	0.02011	1	1	DPP4
Pubmed	30111812	PKM? in the nucleus accumbens acts to dampen cocaine seeking.	Pubmed	0.0007785	1	0.002026	0.02011	1	1	PRKCZ
Pubmed	19879422	CLU and colon cancer. The dual face of CLU: from normal to malignant phenotype.	Pubmed	0.0007785	1	0.002026	0.02011	1	1	CLU
Pubmed	20498858	HPV infection and EGFR activation/alteration in HIV-infected East African patients with conjunctival carcinoma.	Pubmed	0.0007785	1	0.002026	0.02011	1	1	EGFR
Pubmed	25939061	Acquired EGFR C797S mutation mediates resistance to AZD9291 in non-small cell lung cancer harboring EGFR T790M.	Pubmed	0.0007785	1	0.002026	0.02011	1	1	EGFR
Pubmed	23197976	Dipeptidyl peptidase 4 inhibition may facilitate healing of chronic foot ulcers in patients with type 2 diabetes.	Pubmed	0.0007785	1	0.002026	0.02011	1	1	DPP4
Pubmed	26802469	Renoprotective effect of DPP-4 inhibitors against free fatty acid-bound albumin-induced renal proximal tubular cell injury.	Pubmed	0.0007785	1	0.002026	0.02011	1	1	DPP4
Pubmed	24175291	The role of calprotectin in pediatric disease.	Pubmed	0.0007785	1	0.002026	0.02011	1	1	S100A9
Pubmed	28093196	A prospective single centre pilot evaluation of a serum calprotectin assay in unselected GI patients.	Pubmed	0.0007785	1	0.002026	0.02011	1	1	S100A9
Pubmed	25236981	Relevance of EGFR mutation with micropapillary pattern according to the novel IASLC/ATS/ERS lung adenocarcinoma classification and correlation with prognosis in Chinese patients.	Pubmed	0.0007785	1	0.002026	0.02011	1	1	EGFR
Pubmed	18752056	Analysis of EGFR gene amplification, protein over-expression and tyrosine kinase domain mutation in recurrent glioblastoma.	Pubmed	0.0007785	1	0.002026	0.02011	1	1	EGFR
Pubmed	29111173	Epidermal growth factor receptor mutation predicts favorable outcomes in non-small cell lung cancer patients with brain metastases treated with stereotactic radiosurgery.	Pubmed	0.0007785	1	0.002026	0.02011	1	1	EGFR
Pubmed	18692120	Peptide ligand-mediated liposome distribution and targeting to EGFR expressing tumor in vivo.	Pubmed	0.0007785	1	0.002026	0.02011	1	1	EGFR
Pubmed	16179938	Challenge and promise: roles for clusterin in pathogenesis, progression and therapy of cancer.	Pubmed	0.0007785	1	0.002026	0.02011	1	1	CLU
Pubmed	17598123	807C/T polymorphism in platelet glycoprotein Ia gene is not associated with retinal vein occlusion.	Pubmed	0.0007785	1	0.002026	0.02011	1	1	ITGA2
Pubmed	14696090	Expression of a naturally occurring constitutively active variant of the epidermal growth factor receptor in mouse fibroblasts increases motility.	Pubmed	0.0007785	1	0.002026	0.02011	1	1	EGFR
Pubmed	17412999	The extracellular chaperone clusterin influences amyloid formation and toxicity by interacting with prefibrillar structures.	Pubmed	0.0007785	1	0.002026	0.02011	1	1	CLU
Pubmed	25884309	Plasma clusterin as a candidate pre-diagnosis marker of colorectal cancer risk in the Florence cohort of the European Prospective Investigation into Cancer and Nutrition: a pilot study.	Pubmed	0.0007785	1	0.002026	0.02011	1	1	CLU
Pubmed	27284695	Effects of DMSO, glycerol, betaine and their combinations in detecting single nucleotide polymorphisms of epidermal growth factor receptor (EGFR) gene promoter sequence in non-small-cell lung cancer (NSCLC) patients.	Pubmed	0.0007785	1	0.002026	0.02011	1	1	EGFR
Pubmed	23517177	EGFR mutational status in penile cancer.	Pubmed	0.0007785	1	0.002026	0.02011	1	1	EGFR
Pubmed	23677473	Dipeptidyl peptidase IV is a human and murine neutrophil chemorepellent.	Pubmed	0.0007785	1	0.002026	0.02011	1	1	DPP4
Pubmed	1362202	Dipeptidyl peptidase IV as a differentiation marker of the human endometrial glandular cells.	Pubmed	0.0007785	1	0.002026	0.02011	1	1	DPP4
Pubmed	25936882	[Relationship between EGFR Promoter Region Methylation and Secondary Resistance Which may be Induced by Gefitinib].	Pubmed	0.0007785	1	0.002026	0.02011	1	1	EGFR
Pubmed	26148607	Association between BIM deletion polymorphism and clinical outcome of EGFR-mutated NSCLC patient with EGFR-TKI therapy: A meta-analysis.	Pubmed	0.0007785	1	0.002026	0.02011	1	1	EGFR
Pubmed	26290189	Lack of epidermal growth factor receptor (EGFR)-activating mutations in triple-negative breast cancer in China.	Pubmed	0.0007785	1	0.002026	0.02011	1	1	EGFR
Pubmed	15082004	Prognostic value of EGF receptor and tumor cell proliferation in bladder cancer: therapeutic implications.	Pubmed	0.0007785	1	0.002026	0.02011	1	1	EGFR
Pubmed	9881687	Functional comparison of bovine, murine, and human beta2-microglobulin: interactions with murine MHC I molecules.	Pubmed	0.0007785	1	0.002026	0.02011	1	1	B2M
Pubmed	19879423	Clusterin (CLU) and lung cancer.	Pubmed	0.0007785	1	0.002026	0.02011	1	1	CLU
Pubmed	24222141	Predicting skin toxicity according to EGFR polymorphisms in patients with colorectal cancer receiving antibody against EGFR.	Pubmed	0.0007785	1	0.002026	0.02011	1	1	EGFR
Pubmed	19284481	Epidermal growth factor receptor extracellular domain mutations in primary glioblastoma.	Pubmed	0.0007785	1	0.002026	0.02011	1	1	EGFR
Pubmed	12435727	Epidermal growth factor receptor mediates increased cell proliferation, migration, and aggregation in esophageal keratinocytes in vitro and in vivo.	Pubmed	0.0007785	1	0.002026	0.02011	1	1	EGFR
Pubmed	21672359	Functional effect of platelet membrane glycoprotein ia gene polymorphism in the pathogenesis of unstable angina pectoris.	Pubmed	0.0007785	1	0.002026	0.02011	1	1	ITGA2
Pubmed	28383802	Computed tomography and clinical features associated with epidermal growth factor receptor mutation status in stage I/II lung adenocarcinoma.	Pubmed	0.0007785	1	0.002026	0.02011	1	1	EGFR
Pubmed	29615081	Association between serum S100A9 levels and liver necroinflammation in chronic hepatitis B.	Pubmed	0.0007785	1	0.002026	0.02011	1	1	S100A9
Pubmed	30408068	Anti-EGFR anchored paclitaxel loaded PLGA nanoparticles for the treatment of triple negative breast cancer. In-vitro and in-vivo anticancer activities.	Pubmed	0.0007785	1	0.002026	0.02011	1	1	EGFR
Pubmed	28412829	EGFR Expression in Patients with Esophageal Squamous Cell Carcinoma and its Association with Pathologic Response to Preoperative Chemoradiotherapy: A Study in Northeastern Iran.	Pubmed	0.0007785	1	0.002026	0.02011	1	1	EGFR
Pubmed	25824756	Study on the correlation between extracellular matrix protein-1 and the growth, metastasis and angiogenesis of laryngeal carcinoma.	Pubmed	0.0007785	1	0.002026	0.02011	1	1	ECM1
Pubmed	27152724	Epidermal Growth Factor Receptor in Prostate Cancer Derived Exosomes.	Pubmed	0.0007785	1	0.002026	0.02011	1	1	EGFR
Pubmed	21871968	Atypical PKC? transduces electrophilic fatty acid signaling in pulmonary epithelial cells.	Pubmed	0.0007785	1	0.002026	0.02011	1	1	PRKCZ
Pubmed	12531797	Beta 2-microglobulin as a negative regulator of the immune system: high concentrations of the protein inhibit in vitro generation of functional dendritic cells.	Pubmed	0.0007785	1	0.002026	0.02011	1	1	B2M
Pubmed	23418425	Detection and clinical significance of intratumoral EGFR mutational heterogeneity in Chinese patients with advanced non-small cell lung cancer.	Pubmed	0.0007785	1	0.002026	0.02011	1	1	EGFR
Pubmed	22524657	Establishment of a monoclonal anti-pan HLA class I antibody suitable for immunostaining of formalin-fixed tissue: unusually high frequency of down-regulation in breast cancer tissues.	Pubmed	0.0007785	1	0.002026	0.02011	1	1	B2M
Pubmed	19460843	Serine proteases decrease intestinal epithelial ion permeability by activation of protein kinase Czeta.	Pubmed	0.0007785	1	0.002026	0.02011	1	1	PRKCZ
Pubmed	23410174	Recent advances in drug design of epidermal growth factor receptor inhibitors.	Pubmed	0.0007785	1	0.002026	0.02011	1	1	EGFR
Pubmed	26867973	Plasma EGFR T790M ctDNA status is associated with clinical outcome in advanced NSCLC patients with acquired EGFR-TKI resistance.	Pubmed	0.0007785	1	0.002026	0.02011	1	1	EGFR
Pubmed	9198193	Platelet receptors for collagen.	Pubmed	0.0007785	1	0.002026	0.02011	1	1	ITGA2
Pubmed	18379371	Long-lasting complete remission with tyrosine kinase inhibitor in bronchioloalveolar carcinoma with a so far unknown EGFR mutation.	Pubmed	0.0007785	1	0.002026	0.02011	1	1	EGFR
Pubmed	28024796	Mechanisms of epidermal growth factor receptor signaling as characterized by patterned ligand activation and mutational analysis.	Pubmed	0.0007785	1	0.002026	0.02011	1	1	EGFR
Pubmed	19130320	Correlation of F-18 fluorodeoxyglucose-positron emission tomography maximal standardized uptake value and EGFR mutations in advanced lung adenocarcinoma.	Pubmed	0.0007785	1	0.002026	0.02011	1	1	EGFR
Pubmed	23209684	No diagnostic value of plasma clusterin in Alzheimer's disease.	Pubmed	0.0007785	1	0.002026	0.02011	1	1	CLU
Pubmed	9242447	Targeted disruption of the epidermal growth factor receptor impairs growth of squamous papillomas expressing the v-ras(Ha) oncogene but does not block in vitro keratinocyte responses to oncogenic ras.	Pubmed	0.0007785	1	0.002026	0.02011	1	1	EGFR
Pubmed	22475628	Down-regulation of PKC? in renal cell carcinoma and its clinicopathological implications.	Pubmed	0.0007785	1	0.002026	0.02011	1	1	PRKCZ
Pubmed	20009887	Overexpression of clusterin in ovarian cancer is correlated with impaired survival.	Pubmed	0.0007785	1	0.002026	0.02011	1	1	CLU
Pubmed	19219685	Extracellular matrix proteins in epiretinal membranes and in diabetic retinopathy.	Pubmed	0.0007785	1	0.002026	0.02011	1	1	ECM1
Pubmed	11714759	H-2D ligand expression by Ly49A+ natural killer (NK) cells precludes ligand uptake from environmental cells: implications for NK cell function.	Pubmed	0.0007785	1	0.002026	0.02011	1	1	B2M
Pubmed	18711136	Modeling oncogene addiction using RNA interference.	Pubmed	0.0007785	1	0.002026	0.02011	1	1	EGFR
Pubmed	15118125	EGFR mutations in lung cancer: correlation with clinical response to gefitinib therapy.	Pubmed	0.0007785	1	0.002026	0.02011	1	1	EGFR
Pubmed	14630704	Regulation of adenosine receptor engagement by ecto-adenosine deaminase.	Pubmed	0.0007785	1	0.002026	0.02011	1	1	DPP4
Pubmed	20009574	Matrix hyaluronan alters epidermal growth factor receptor-dependent cell morphology.	Pubmed	0.0007785	1	0.002026	0.02011	1	1	EGFR
Pubmed	11886870	Sequestration of epidermal growth factor receptors in non-caveolar lipid rafts inhibits ligand binding.	Pubmed	0.0007785	1	0.002026	0.02011	1	1	EGFR
Pubmed	17525828	Increased expression of plasma and CD4+ T lymphocyte costimulatory molecule CD26 in adult patients with allergic asthma.	Pubmed	0.0007785	1	0.002026	0.02011	1	1	DPP4
Pubmed	17764813	Factors affecting human T cell engraftment, trafficking, and associated xenogeneic graft-vs-host disease in NOD/SCID beta2mnull mice.	Pubmed	0.0007785	1	0.002026	0.02011	1	1	B2M
Pubmed	23371026	Identification of potential glycan cancer markers with sialic acid attached to sialic acid and up-regulated fucosylated galactose structures in epidermal growth factor receptor secreted from A431 cell line.	Pubmed	0.0007785	1	0.002026	0.02011	1	1	EGFR
Pubmed	16226114	Epidermal growth factor receptor expression status in lung cancer correlates with its mutation.	Pubmed	0.0007785	1	0.002026	0.02011	1	1	EGFR
Pubmed	16569667	Epithelial cell motility is triggered by activation of the EGF receptor through phosphatidic acid signaling.	Pubmed	0.0007785	1	0.002026	0.02011	1	1	EGFR
Pubmed	12471135	Cell surface peptidase CD26/dipeptidylpeptidase IV regulates CXCL12/stromal cell-derived factor-1 alpha-mediated chemotaxis of human cord blood CD34+ progenitor cells.	Pubmed	0.0007785	1	0.002026	0.02011	1	1	DPP4
Pubmed	15913841	EGFR mutations in malignant pleural effusion of non-small cell lung cancer: a case report.	Pubmed	0.0007785	1	0.002026	0.02011	1	1	EGFR
Pubmed	25820123	'Carriers of variant luteinizing hormone (V-LH) among 1593 Baltic men have significantly higher serum LH'.	Pubmed	0.0007785	1	0.002026	0.02011	1	1	LHB
Pubmed	21315473	Screening for EGFR mutations in lung cancer, a report from India.	Pubmed	0.0007785	1	0.002026	0.02011	1	1	EGFR
Pubmed	11186422	Localisation of clusterin in normal human sperm by immunogold electron microscopy.	Pubmed	0.0007785	1	0.002026	0.02011	1	1	CLU
Pubmed	12675248	Dipeptidylpeptidase IV activities in prostatic secretions.	Pubmed	0.0007785	1	0.002026	0.02011	1	1	DPP4
Pubmed	27612423	Differential protein stability of EGFR mutants determines responsiveness to tyrosine kinase inhibitors.	Pubmed	0.0007785	1	0.002026	0.02011	1	1	EGFR
Pubmed	17359935	Clusterin is protective in pancreatitis through anti-apoptotic and anti-inflammatory properties.	Pubmed	0.0007785	1	0.002026	0.02011	1	1	CLU
Pubmed	19500323	The new platelet alloantigen Cab a: a single point mutation Gln 716 His on the alpha 2 integrin.	Pubmed	0.0007785	1	0.002026	0.02011	1	1	ITGA2
Pubmed	22026926	The human epidermal growth factor receptor (EGFR) gene in European patients with advanced colorectal cancer harbors infrequent mutations in its tyrosine kinase domain.	Pubmed	0.0007785	1	0.002026	0.02011	1	1	EGFR
Pubmed	23212424	Heterogeneity of the EGFR mutation status between the primary tumor and metastatic lymph node and the sensitivity to EGFR tyrosine kinase inhibitor in non-small cell lung cancer.	Pubmed	0.0007785	1	0.002026	0.02011	1	1	EGFR
Pubmed	18653647	The epidermal growth factor receptor mediates allergic airway remodelling in the rat.	Pubmed	0.0007785	1	0.002026	0.02011	1	1	EGFR
Pubmed	28554755	Characterization of common and rare mutations in EGFR and associated clinicopathological features in a large population of Chinese patients with lung cancer.	Pubmed	0.0007785	1	0.002026	0.02011	1	1	EGFR
Pubmed	21505178	Prevention of bronchial hyperplasia by EGFR pathway inhibitors in an organotypic culture model.	Pubmed	0.0007785	1	0.002026	0.02011	1	1	EGFR
Pubmed	18025312	Up-regulation of the mucosal epidermal growth factor receptor gene in chronic rhinosinusitis and nasal polyposis.	Pubmed	0.0007785	1	0.002026	0.02011	1	1	EGFR
Pubmed	24379520	Altered peptidase activities in thyroid neoplasia and hyperplasia.	Pubmed	0.0007785	1	0.002026	0.02011	1	1	DPP4
Pubmed	18839307	Invasive ductal carcinoma of the breast with the "triple-negative" phenotype: prognostic implications of EGFR immunoreactivity.	Pubmed	0.0007785	1	0.002026	0.02011	1	1	EGFR
Pubmed	25915403	Lipopolysaccharide (LPS)-Induced Biliary Epithelial Cell NRas Activation Requires Epidermal Growth Factor Receptor (EGFR).	Pubmed	0.0007785	1	0.002026	0.02011	1	1	EGFR
Pubmed	11462045	Viral load increases in SJL/J mice persistently infected by Theiler's virus after inactivation of the beta(2)m gene.	Pubmed	0.0007785	1	0.002026	0.02011	1	1	B2M
Pubmed	16398612	Isolation of scFvs to in vitro produced extracellular domains of EGFR family members.	Pubmed	0.0007785	1	0.002026	0.02011	1	1	EGFR
Pubmed	29117310	Sequencing and phasing cancer mutations in lung cancers using a long-read portable sequencer.	Pubmed	0.0007785	1	0.002026	0.02011	1	1	EGFR
Pubmed	22826471	Cancer/testis antigen expression as a predictor for epidermal growth factor receptor mutation and prognosis in lung adenocarcinoma.	Pubmed	0.0007785	1	0.002026	0.02011	1	1	EGFR
Pubmed	26809984	First-Line Pemetrexed Plus Cisplatin Followed by Gefitinib Maintenance Therapy Versus Gefitinib Monotherapy in East Asian Never-Smoker Patients With Locally Advanced or Metastatic Nonsquamous Non-Small-cell Lung Cancer: Quality of Life Results From a Randomized Phase III Trial.	Pubmed	0.0007785	1	0.002026	0.02011	1	1	EGFR
Pubmed	24335351	EGFR signaling and autophagy dependence for growth, survival, and therapy resistance.	Pubmed	0.0007785	1	0.002026	0.02011	1	1	EGFR
Pubmed	26248266	Breaking bad blood: ?2-microglobulin as a pro-aging factor in blood.	Pubmed	0.0007785	1	0.002026	0.02011	1	1	B2M
Pubmed	16741920	Epidermal growth factor receptor (ErbB1) expression in prostate cancer progression: correlation with androgen independence.	Pubmed	0.0007785	1	0.002026	0.02011	1	1	EGFR
Pubmed	25940237	Identification of previously unknown SERPINB7 splice variants in patients with Nagashima-type palmoplantar keratosis reveals the importance of the CD-loop of SERPINB7.	Pubmed	0.0007785	1	0.002026	0.02011	1	1	SERPINB7
Pubmed	22539795	Beyond HLA-A*0201: new HLA-transgenic nonobese diabetic mouse models of type 1 diabetes identify the insulin C-peptide as a rich source of CD8+ T cell epitopes.	Pubmed	0.0007785	1	0.002026	0.02011	1	1	B2M
Pubmed	24212998	Paired immunoglobulin-like receptor A is an intrinsic, self-limiting suppressor of IL-5-induced eosinophil development.	Pubmed	0.0007785	1	0.002026	0.02011	1	1	B2M
Pubmed	28819180	EGFR is a pivotal regulator of thrombin-mediated inflammation in primary human nucleus pulposus culture.	Pubmed	0.0007785	1	0.002026	0.02011	1	1	EGFR
Pubmed	24986561	A prognostic analysis of pediatrics central nervous system small cell tumors: evaluation of EGFR family gene amplification and overexpression.	Pubmed	0.0007785	1	0.002026	0.02011	1	1	EGFR
Pubmed	19153055	Discovery of a new biomarker for the mucopolysaccharidoses (MPS), dipeptidyl peptidase IV (DPP-IV; CD26), by SELDI-TOF mass spectrometry.	Pubmed	0.0007785	1	0.002026	0.02011	1	1	DPP4
Pubmed	11875501	Prostaglandin E2 transactivates EGF receptor: a novel mechanism for promoting colon cancer growth and gastrointestinal hypertrophy.	Pubmed	0.0007785	1	0.002026	0.02011	1	1	EGFR
Pubmed	23279642	Secretory clusterin contributes to oxaliplatin resistance by activating Akt pathway in hepatocellular carcinoma.	Pubmed	0.0007785	1	0.002026	0.02011	1	1	CLU
Pubmed	26353808	Intraindividual changes of dipeptidyl peptidase-IV in peripheral blood of patients with rheumatoid arthritis are associated with the disease activity.	Pubmed	0.0007785	1	0.002026	0.02011	1	1	DPP4
Pubmed	20418893	Comparable rate of EGFR kinase domain mutation in lung adenocarcinomas from Chinese male and female never-smokers.	Pubmed	0.0007785	1	0.002026	0.02011	1	1	EGFR
Pubmed	29712634	Enhanced phosphocholine metabolism is essential for terminal erythropoiesis.	Pubmed	0.0007785	1	0.002026	0.02011	1	1	PHOSPHO1
Pubmed	27365216	Clusterin expression is upregulated following acute head injury and localizes to astrocytes in old head injury.	Pubmed	0.0007785	1	0.002026	0.02011	1	1	CLU
Pubmed	26461062	Pathological responses after angiogenesis or EGFR inhibitors in metastatic colorectal cancer depend on the chemotherapy backbone.	Pubmed	0.0007785	1	0.002026	0.02011	1	1	EGFR
Pubmed	22978472	Pathological significance of epidermal growth factor receptor expression and amplification in human gliomas.	Pubmed	0.0007785	1	0.002026	0.02011	1	1	EGFR
Pubmed	21575252	Germ-line mutations in epidermal growth factor receptor (EGFR) are rare but may contribute to oncogenesis: a novel germ-line mutation in EGFR detected in a patient with lung adenocarcinoma.	Pubmed	0.0007785	1	0.002026	0.02011	1	1	EGFR
Pubmed	28780743	High probability and frequency of EGFR mutations in non-small cell lung cancer with brain metastases.	Pubmed	0.0007785	1	0.002026	0.02011	1	1	EGFR
Pubmed	24759767	Delineating the functional map of the interaction between nimotuzumab and the epidermal growth factor receptor.	Pubmed	0.0007785	1	0.002026	0.02011	1	1	EGFR
Pubmed	19521735	Extracellular matrix 1 (ECM1) expression is a novel prognostic marker for poor long-term survival in breast cancer: a Hospital-based Cohort Study in Iowa.	Pubmed	0.0007785	1	0.002026	0.02011	1	1	ECM1
Pubmed	30804129	Gefitinib Plus Bevacizumab	Pubmed	0.0007785	1	0.002026	0.02011	1	1	EGFR
Pubmed	10673385	The internalization and endosomal trafficking of the EGF receptor in response to EGF is delayed in the waved-2 mouse liver.	Pubmed	0.0007785	1	0.002026	0.02011	1	1	EGFR
Pubmed	23780873	EGFR mutations detected on cytology samples by a centralized laboratory reliably predict response to gefitinib in non-small cell lung carcinoma patients.	Pubmed	0.0007785	1	0.002026	0.02011	1	1	EGFR
Pubmed	3510743	Detailed analysis of the mouse H-2Kb promoter: enhancer-like sequences and their role in the regulation of class I gene expression.	Pubmed	0.0007785	1	0.002026	0.02011	1	1	B2M
Pubmed	17274979	Regulation of clusterin expression in mammary epithelial cells.	Pubmed	0.0007785	1	0.002026	0.02011	1	1	CLU
Pubmed	15956717	Relaxin stimulates multiple signaling pathways: activation of cAMP, PI3K, and PKCzeta in THP-1 cells.	Pubmed	0.0007785	1	0.002026	0.02011	1	1	PRKCZ
Pubmed	16490286	Clusterin in cerebrospinal fluid: analysis of carbohydrates and quantification of native and glycosylated forms.	Pubmed	0.0007785	1	0.002026	0.02011	1	1	CLU
Pubmed	16820192	Integrin, alpha 2 gene C807T polymorphism and risk of ischemic stroke: a meta-analysis.	Pubmed	0.0007785	1	0.002026	0.02011	1	1	ITGA2
Pubmed	15994331	Ligand-induced dimer-tetramer transition during the activation of the cell surface epidermal growth factor receptor-A multidimensional microscopy analysis.	Pubmed	0.0007785	1	0.002026	0.02011	1	1	EGFR
Pubmed	24778155	Dipeptidylpeptidase IV (CD26) defines leukemic stem cells (LSC) in chronic myeloid leukemia.	Pubmed	0.0007785	1	0.002026	0.02011	1	1	DPP4
Pubmed	22806538	Impaired expression of CD26 compromises T-cell recruitment in human visceral leishmaniasis.	Pubmed	0.0007785	1	0.002026	0.02011	1	1	DPP4
Pubmed	23225015	?(2)-microglobulin amyloidosis.	Pubmed	0.0007785	1	0.002026	0.02011	1	1	B2M
Pubmed	7896279	Assignment of the human GDID4 gene, a GDP/GTP-exchange regulator, to chromosome 12p12.3.	Pubmed	0.0007785	1	0.002026	0.02011	1	1	ARHGDIB
Pubmed	22417006	Epidermal growth factor receptor copy number in potentially malignant oral disorders and oral squamous cell carcinoma: a short communication and preliminary study.	Pubmed	0.0007785	1	0.002026	0.02011	1	1	EGFR
Pubmed	24625195	Variant-beta luteinizing hormone is not associated with poor ovarian response to controlled ovarian hyperstimulation.	Pubmed	0.0007785	1	0.002026	0.02011	1	1	LHB
Pubmed	26179713	Promoter-level expression clustering identifies time development of transcriptional regulatory cascades initiated by ErbB receptors in breast cancer cells.	Pubmed	0.0007785	1	0.002026	0.02011	1	1	EGFR
Pubmed	7880396	Myometrial expression of mRNA encoding epidermal growth factor receptor (EGFR) throughout the menstrual cycle.	Pubmed	0.0007785	1	0.002026	0.02011	1	1	EGFR
Pubmed	12778469	Deficiency of CD26 results in a change of cytokine and immunoglobulin secretion after stimulation by pokeweed mitogen.	Pubmed	0.0007785	1	0.002026	0.02011	1	1	DPP4
Pubmed	24185104	14-3-3? attenuates RhoGDI2-induced cisplatin resistance through activation of Erk and p38 in gastric cancer cells.	Pubmed	0.0007785	1	0.002026	0.02011	1	1	ARHGDIB
Pubmed	26672095	Inhibition of Dipeptidyl Peptidase-4 Impairs Ventricular Function and Promotes Cardiac Fibrosis in High Fat-Fed Diabetic Mice.	Pubmed	0.0007785	1	0.002026	0.02011	1	1	DPP4
Pubmed	26440883	The Membrane Mimetic Affects the Spatial Structure and Mobility of EGFR Transmembrane and Juxtamembrane Domains.	Pubmed	0.0007785	1	0.002026	0.02011	1	1	EGFR
Pubmed	29091025	Reactive oxygen species-dependent Toll/NF-?B activation in the	Pubmed	0.0007785	1	0.002026	0.02011	1	1	EGFR
Pubmed	8635502	Specific binding of adenosine deaminase but not HIV-1 transactivator protein Tat to human CD26.	Pubmed	0.0007785	1	0.002026	0.02011	1	1	DPP4
Pubmed	23681769	The mechanisms of EGFR in the regulation of axon regeneration.	Pubmed	0.0007785	1	0.002026	0.02011	1	1	EGFR
Pubmed	25352738	Novel mutations in the TSPAN12 gene in Chinese patients with familial exudative vitreoretinopathy.	Pubmed	0.0007785	1	0.002026	0.02011	1	1	TSPAN12
Pubmed	25122430	Gefitinib treatment in EGFR mutated caucasian NSCLC: circulating-free tumor DNA as a surrogate for determination of EGFR status.	Pubmed	0.0007785	1	0.002026	0.02011	1	1	EGFR
Pubmed	8431639	Sulfated glycoprotein-2 (Sgp-2) maps to mouse chromosome 14.	Pubmed	0.0007785	1	0.002026	0.02011	1	1	CLU
Pubmed	29173761	Matched-pair analysis of a multi-institutional cohort reveals that epidermal growth factor receptor mutation is not a risk factor for postoperative recurrence of lung adenocarcinoma.	Pubmed	0.0007785	1	0.002026	0.02011	1	1	EGFR
Pubmed	17227303	Lack of EGFR gene mutations in exons 19 and 21 in esophageal (Barrett's) adenocarcinomas.	Pubmed	0.0007785	1	0.002026	0.02011	1	1	EGFR
Pubmed	21107472	Beta2-microglobulin causes abnormal phosphatidylserine exposure in human red blood cells.	Pubmed	0.0007785	1	0.002026	0.02011	1	1	B2M
Pubmed	8416386	Theiler's virus infection of beta 2-microglobulin-deficient mice.	Pubmed	0.0007785	1	0.002026	0.02011	1	1	B2M
Pubmed	24821427	Blockade of CD26 signaling inhibits human osteoclast development.	Pubmed	0.0007785	1	0.002026	0.02011	1	1	DPP4
Pubmed	15569941	Targeted disruption of luteinizing hormone beta-subunit leads to hypogonadism, defects in gonadal steroidogenesis, and infertility.	Pubmed	0.0007785	1	0.002026	0.02011	1	1	LHB
Pubmed	18497962	Mutations of epidermal growth factor receptor in colon cancer indicate susceptibility or resistance to gefitinib.	Pubmed	0.0007785	1	0.002026	0.02011	1	1	EGFR
Pubmed	20019877	Protective effect of clusterin on oxidative stress-induced cell death of human corneal endothelial cells.	Pubmed	0.0007785	1	0.002026	0.02011	1	1	CLU
Pubmed	29411775	Respiratory syncytial virus activates epidermal growth factor receptor to suppress interferon regulatory factor 1-dependent interferon-lambda and antiviral defense in airway epithelium.	Pubmed	0.0007785	1	0.002026	0.02011	1	1	EGFR
Pubmed	25300933	EGFR and K-Ras mutations in women with lung adenocarcinoma: implications for treatment strategy definition.	Pubmed	0.0007785	1	0.002026	0.02011	1	1	EGFR
Pubmed	17786309	Expression and enzymatic activity of dipeptidyl peptidase-IV in human astrocytic tumours are associated with tumour grade.	Pubmed	0.0007785	1	0.002026	0.02011	1	1	DPP4
Pubmed	18587327	Salivary gland-type lung carcinomas: an EGFR immunohistochemical, molecular genetic, and mutational analysis study.	Pubmed	0.0007785	1	0.002026	0.02011	1	1	EGFR
Pubmed	22192147	Lack of EGFR-activating mutations in European patients with triple-negative breast cancer could emphasise geographic and ethnic variations in breast cancer mutation profiles.	Pubmed	0.0007785	1	0.002026	0.02011	1	1	EGFR
Pubmed	9645485	Dipeptidyl peptidase IV (DP IV, CD26) is involved in regulation of DNA synthesis in human keratinocytes.	Pubmed	0.0007785	1	0.002026	0.02011	1	1	DPP4
Pubmed	21457545	Mutations in the epidermal growth factor receptor (EGFR) gene in triple negative breast cancer: possible implications for targeted therapy.	Pubmed	0.0007785	1	0.002026	0.02011	1	1	EGFR
Pubmed	18452188	The calcium binding protein S100A9 is essential for pancreatic leukocyte infiltration and induces disruption of cell-cell contacts.	Pubmed	0.0007785	1	0.002026	0.02011	1	1	S100A9
Pubmed	24207119	Mutations in SERPINB7, encoding a member of the serine protease inhibitor superfamily, cause Nagashima-type palmoplantar keratosis.	Pubmed	0.0007785	1	0.002026	0.02011	1	1	SERPINB7
Pubmed	18752498	hCG beta expression by cervical squamous carcinoma--in vivo histological association with tumour invasion and apoptosis.	Pubmed	0.0007785	1	0.002026	0.02011	1	1	CGB3
Pubmed	23979199	Molecular epidemiology of epidermal growth factor receptor mutations in lung cancers in Indian population.	Pubmed	0.0007785	1	0.002026	0.02011	1	1	EGFR
Pubmed	29898872	Gefitinib for Epidermal Growth Factor Receptor Activated Osteoarthritis Subpopulation Treatment.	Pubmed	0.0007785	1	0.002026	0.02011	1	1	EGFR
Pubmed	24166906	Comprehensive biomarker analysis and final efficacy results of sorafenib in the BATTLE trial.	Pubmed	0.0007785	1	0.002026	0.02011	1	1	EGFR
Pubmed	30658679	PAGE4 promotes prostate cancer cells survive under oxidative stress through modulating MAPK/JNK/ERK pathway.	Pubmed	0.0007785	1	0.002026	0.02011	1	1	PAGE4
Pubmed	30761450	A Comprehensive Meta-Analysis of Association between EGFR Mutation Status and Brain Metastases in NSCLC.	Pubmed	0.0007785	1	0.002026	0.02011	1	1	EGFR
Pubmed	19538870	[Association of EGFR expression with angiogenesis and chemoresistance in ovarian carcinoma].	Pubmed	0.0007785	1	0.002026	0.02011	1	1	EGFR
Pubmed	20088607	Structure of the preamyloid dimer of beta-2-microglobulin from covalent labeling and mass spectrometry.	Pubmed	0.0007785	1	0.002026	0.02011	1	1	B2M
Pubmed	1491011	Identification of the disulfide bonds in human plasma protein SP-40,40 (apolipoprotein-J).	Pubmed	0.0007785	1	0.002026	0.02011	1	1	CLU
Pubmed	21292812	Functional EGFR germline polymorphisms may confer risk for EGFR somatic mutations in non-small cell lung cancer, with a predominant effect on exon 19 microdeletions.	Pubmed	0.0007785	1	0.002026	0.02011	1	1	EGFR
Pubmed	27440084	Interaction of an S100A9 gene variant with saturated fat and carbohydrates to modulate insulin resistance in 3 populations of different ancestries.	Pubmed	0.0007785	1	0.002026	0.02011	1	1	S100A9
Pubmed	29436591	Downregulation of secreted clusterin potentiates the lethality of sorafenib in hepatocellular carcinoma in association with the inhibition of ERK1/2 signals.	Pubmed	0.0007785	1	0.002026	0.02011	1	1	CLU
Pubmed	24528049	Epidermal growth factor receptor mutations in non- small cell lung cancers in a multiethnic malaysian patient population.	Pubmed	0.0007785	1	0.002026	0.02011	1	1	EGFR
Pubmed	18577466	Integrin alphavbeta3 mediates upregulation of epidermal growth-factor receptor expression and activity in human ovarian cancer cells.	Pubmed	0.0007785	1	0.002026	0.02011	1	1	EGFR
Pubmed	20855974	Alternative efficacy-predicting markers for paclitaxel instead of CHFR in non-small-cell lung cancer.	Pubmed	0.0007785	1	0.002026	0.02011	1	1	EGFR
Pubmed	23541408	Early ?-human chorionic gonadotropin trends in vanishing twin pregnancies.	Pubmed	0.0007785	1	0.002026	0.02011	1	1	CGB3
Pubmed	28107191	Epidermal growth factor receptor (EGFR) mutations in non-small cell lung cancer (NSCLC) of Yunnan in southwestern China.	Pubmed	0.0007785	1	0.002026	0.02011	1	1	EGFR
Pubmed	17102595	EGFR Intron 1 polymorphism in Asian Populations and its correlation with EGFR gene expression and amplification in breast tumor tissues.	Pubmed	0.0007785	1	0.002026	0.02011	1	1	EGFR
Pubmed	29858682	Survival analysis and pathological features of advanced non-small cell lung cancer with miliary pulmonary metastases in patients harboring epidermal growth factor receptor mutations.	Pubmed	0.0007785	1	0.002026	0.02011	1	1	EGFR
Pubmed	27191886	Characteristics of young lung cancer: Analysis of Taiwan's nationwide lung cancer registry focusing on epidermal growth factor receptor mutation and smoking status.	Pubmed	0.0007785	1	0.002026	0.02011	1	1	EGFR
Pubmed	29750303	Anticancer effects of isofraxidin against A549 human lung cancer cells via the EGFR signaling pathway.	Pubmed	0.0007785	1	0.002026	0.02011	1	1	EGFR
Pubmed	28637594	Association of plasma dipeptidyl peptidase-4 activity with non-alcoholic fatty liver disease in nondiabetic Chinese population.	Pubmed	0.0007785	1	0.002026	0.02011	1	1	DPP4
Pubmed	23163584	Ligand binding induces a conformational change in epidermal growth factor receptor dimers.	Pubmed	0.0007785	1	0.002026	0.02011	1	1	EGFR
Pubmed	22007939	Epidermal growth factor receptor 1 expression is upregulated in undifferentiated thyroid carcinomas in humans.	Pubmed	0.0007785	1	0.002026	0.02011	1	1	EGFR
Pubmed	7915743	CD4+ and CD8+ alpha beta, and gamma delta T cells are cytotoxic effector cells of beta 2-microglobulin-deficient mice against cells having normal MHC class I expression.	Pubmed	0.0007785	1	0.002026	0.02011	1	1	B2M
Pubmed	23880166	Epidermal growth factor receptor abnormalities in atypical teratoid/rhabdoid tumors and an unusual case with gene amplification.	Pubmed	0.0007785	1	0.002026	0.02011	1	1	EGFR
Pubmed	26980473	Icotinib in Patients with Pretreated Advanced Esophageal Squamous Cell Carcinoma with EGFR Overexpression or EGFR Gene Amplification: AáSingle-Arm, Multicenter Phase 2 Study.	Pubmed	0.0007785	1	0.002026	0.02011	1	1	EGFR
Pubmed	7558133	Increased number of CD4-CD8+ MHC class II-specific T cells in MHC class II-deficient mice.	Pubmed	0.0007785	1	0.002026	0.02011	1	1	B2M
Pubmed	22648548	Compartment- and malignance-dependent up-regulation of ?-glutamyltranspeptidase and dipetidylpeptidase-IV activity in human brain gliomas.	Pubmed	0.0007785	1	0.002026	0.02011	1	1	DPP4
Pubmed	29204146	Intracellular S100A9 Promotes Myeloid-Derived Suppressor Cells during Late Sepsis.	Pubmed	0.0007785	1	0.002026	0.02011	1	1	S100A9
Pubmed	27217441	Anti-EGFR Targeted Monoclonal Antibody Isotype Influences Antitumor Cellular Immunity in Head and Neck Cancer Patients.	Pubmed	0.0007785	1	0.002026	0.02011	1	1	EGFR
Pubmed	18606664	Inhibition of CD26/dipeptidyl peptidase IV enhances CCL11/eotaxin-mediated recruitment of eosinophils in vivo.	Pubmed	0.0007785	1	0.002026	0.02011	1	1	DPP4
Pubmed	18413800	The T790M "gatekeeper" mutation in EGFR mediates resistance to low concentrations of an irreversible EGFR inhibitor.	Pubmed	0.0007785	1	0.002026	0.02011	1	1	EGFR
Pubmed	19519837	A novel homozygous 62-bp insertion in ECM1 causes lipoid proteinosis in a multigeneration Pakistani family.	Pubmed	0.0007785	1	0.002026	0.02011	1	1	ECM1
Pubmed	18088490	[Prognostic significance of lactate dehydrogenase and beta2-microglobulin in chronic lymphocytic leukemia].	Pubmed	0.0007785	1	0.002026	0.02011	1	1	B2M
Pubmed	19276143	Oncocytic, focally anaplastic, thyroid cancer responding to erlotinib.	Pubmed	0.0007785	1	0.002026	0.02011	1	1	EGFR
Pubmed	12675257	CD26-/DPP IV-positive lymphocytes in murine acute experimental colitis.	Pubmed	0.0007785	1	0.002026	0.02011	1	1	DPP4
Pubmed	11533659	Nuclear localization of EGF receptor and its potential new role as a transcription factor.	Pubmed	0.0007785	1	0.002026	0.02011	1	1	EGFR
Pubmed	19374540	EGF-receptor regulation of matrix metalloproteinases in epithelial ovarian carcinoma.	Pubmed	0.0007785	1	0.002026	0.02011	1	1	EGFR
Pubmed	11953893	Antisense epidermal growth factor receptor RNA transfection in human glioblastoma cells down-regulates telomerase activity and telomere length.	Pubmed	0.0007785	1	0.002026	0.02011	1	1	EGFR
Pubmed	27468867	Urinary circulating DNA detection for dynamic tracking of EGFR mutations for NSCLC patients treated with EGFR-TKIs.	Pubmed	0.0007785	1	0.002026	0.02011	1	1	EGFR
Pubmed	1442929	A novel change in cytologic localization of human chorionic gonadotropin and human placental lactogen in first-trimester placenta in the course of gestation.	Pubmed	0.0007785	1	0.002026	0.02011	1	1	CGB3
Pubmed	17108084	3D structure of amyloid protofilaments of beta2-microglobulin fragment probed by solid-state NMR.	Pubmed	0.0007785	1	0.002026	0.02011	1	1	B2M
Pubmed	16550745	A family-based association study of megsin A23167G polymorphism with susceptibility and progression of IgA nephropathy in a Chinese population.	Pubmed	0.0007785	1	0.002026	0.02011	1	1	SERPINB7
Pubmed	21552475	Novel TSPAN12 mutations in patients with familial exudative vitreoretinopathy and their associated phenotypes.	Pubmed	0.0007785	1	0.002026	0.02011	1	1	TSPAN12
Pubmed	30956990	The Diagnostic Value of Quantitative CT Analysis of Ground-Glass Volume Percentage in Differentiating Epidermal Growth Factor Receptor Mutation and Subtypes in Lung Adenocarcinoma.	Pubmed	0.0007785	1	0.002026	0.02011	1	1	EGFR
Pubmed	27393503	Temporal changes of EGFR mutations and T790M levels in tumour and plasma DNA following AZD9291 treatment.	Pubmed	0.0007785	1	0.002026	0.02011	1	1	EGFR
Pubmed	24067727	Activation of EGFR/MEK/ERK/AP-1 signaling mediated by 1,2-naphthoquinone, an atmospheric electrophile, in human pulmonary A549 cells.	Pubmed	0.0007785	1	0.002026	0.02011	1	1	EGFR
Pubmed	19360742	EGFR protein overexpression and mutation in areca quid-associated oral cavity squamous cell carcinoma in Taiwan.	Pubmed	0.0007785	1	0.002026	0.02011	1	1	EGFR
Pubmed	18304967	EGFR regulation by microRNA in lung cancer: correlation with clinical response and survival to gefitinib and EGFR expression in cell lines.	Pubmed	0.0007785	1	0.002026	0.02011	1	1	EGFR
Pubmed	28520821	The percentage of Epidermal Growth Factor Receptor (EGFR)-mutated neoplastic cells correlates to response to tyrosine kinase inhibitors in lung adenocarcinoma.	Pubmed	0.0007785	1	0.002026	0.02011	1	1	EGFR
Pubmed	26434857	Cell Free EGFR mRNA Expression and Implications for Survival and Metastasis in Non-Small Cell Lung Cancer Cases.	Pubmed	0.0007785	1	0.002026	0.02011	1	1	EGFR
Pubmed	16563348	Activation of the human pregnancy-specific glycoprotein PSG-5 promoter by KLF4 and Sp1.	Pubmed	0.0007785	1	0.002026	0.02011	1	1	PSG5
Pubmed	12192077	The role of disulfide bond in the amyloidogenic state of beta(2)-microglobulin studied by heteronuclear NMR.	Pubmed	0.0007785	1	0.002026	0.02011	1	1	B2M
Pubmed	16278407	Molecular study of malignant gliomas treated with epidermal growth factor receptor inhibitors: tissue analysis from North American Brain Tumor Consortium Trials 01-03 and 00-01.	Pubmed	0.0007785	1	0.002026	0.02011	1	1	EGFR
Pubmed	30320346	High expression of TMEM40 contributes to progressive features of tongue squamous cell carcinoma.	Pubmed	0.0007785	1	0.002026	0.02011	1	1	TMEM40
Pubmed	28657666	Assessing the effect of D59P mutation in the DE loop region in amyloid aggregation propensity of ?2-microglobulin: A molecular dynamics simulation study.	Pubmed	0.0007785	1	0.002026	0.02011	1	1	B2M
Pubmed	2158859	Signal transduction by receptors with tyrosine kinase activity.	Pubmed	0.0007785	1	0.002026	0.02011	1	1	EGFR
Pubmed	28652432	Chromosome 7 Multiplication in EGFR-positive Lung Carcinomas Based on Tissue Microarray Analysis.	Pubmed	0.0007785	1	0.002026	0.02011	1	1	EGFR
Pubmed	24130353	Adipose dipeptidyl peptidase-4 and obesity: correlation with insulin resistance and depot-specific release from adipose tissue in vivo and in vitro.	Pubmed	0.0007785	1	0.002026	0.02011	1	1	DPP4
Pubmed	28318663	Dipeptidyl peptidase-IV in chronic heart failure with reduced ejection fraction.	Pubmed	0.0007785	1	0.002026	0.02011	1	1	DPP4
Pubmed	28587613	Prognostic value of plasma DPP4 activity in ST-elevation myocardial infarction.	Pubmed	0.0007785	1	0.002026	0.02011	1	1	DPP4
Pubmed	23411014	Genetic variation in clusterin gene and Alzheimer's disease risk in Han Chinese.	Pubmed	0.0007785	1	0.002026	0.02011	1	1	CLU
Pubmed	17032352	Distinct but critical roles for integrin alphaIIbbeta3 in platelet lamellipodia formation on fibrinogen, collagen-related peptide and thrombin.	Pubmed	0.0007785	1	0.002026	0.02011	1	1	ITGA2
Pubmed	7916494	Localization of the Br polymorphism on a 144 bp exon of the GPIa gene and its application in platelet DNA typing.	Pubmed	0.0007785	1	0.002026	0.02011	1	1	ITGA2
Pubmed	26418954	EGFRvIII does not affect radiosensitivity with or without gefitinib treatment in glioblastoma cells.	Pubmed	0.0007785	1	0.002026	0.02011	1	1	EGFR
Pubmed	18978556	A sensitive method for detecting EGFR mutations in non-small cell lung cancer samples with few tumor cells.	Pubmed	0.0007785	1	0.002026	0.02011	1	1	EGFR
Pubmed	21444717	Human epidermal growth factor receptor (EGFR) aligned on the plasma membrane adopts key features of Drosophila EGFR asymmetry.	Pubmed	0.0007785	1	0.002026	0.02011	1	1	EGFR
Pubmed	20506358	Nitric oxide stimulates the proliferation of neural stem cells bypassing the epidermal growth factor receptor.	Pubmed	0.0007785	1	0.002026	0.02011	1	1	EGFR
Pubmed	16968809	Pharmacology and signaling properties of epidermal growth factor receptor isoforms studied by bioluminescence resonance energy transfer.	Pubmed	0.0007785	1	0.002026	0.02011	1	1	EGFR
Pubmed	23841084	Increased expression of epidermal growth factor receptor (EGF-R) in patients with different forms of lung fibrosis.	Pubmed	0.0007785	1	0.002026	0.02011	1	1	EGFR
Pubmed	20439191	Genetic evolution of epidermal growth factor receptor in adenocarcinoma with a bronchioloalveolar carcinoma component.	Pubmed	0.0007785	1	0.002026	0.02011	1	1	EGFR
Pubmed	21131979	??-microglobulin forms three-dimensional domain-swapped amyloid fibrils with disulfide linkages.	Pubmed	0.0007785	1	0.002026	0.02011	1	1	B2M
Pubmed	23113658	CD26-mediated co-stimulation in human CD8(+) T cells provokes effector function via pro-inflammatory cytokine production.	Pubmed	0.0007785	1	0.002026	0.02011	1	1	DPP4
Pubmed	25056937	Inhibition of circulating dipeptidyl peptidase 4 activity in patients with metastatic prostate cancer.	Pubmed	0.0007785	1	0.002026	0.02011	1	1	DPP4
Pubmed	22294553	Hedgehog-EGFR cooperation response genes determine the oncogenic phenotype of basal cell carcinoma and tumour-initiating pancreatic cancer cells.	Pubmed	0.0007785	1	0.002026	0.02011	1	1	EGFR
Pubmed	12134064	Epidermal growth factor receptor dependence of radiation-induced transcription factor activation in human breast carcinoma cells.	Pubmed	0.0007785	1	0.002026	0.02011	1	1	EGFR
Pubmed	28596108	Association Between EGFR T790M Status and Progression Patterns During Initial EGFR-TKI Treatment in Patients Harboring EGFR Mutation.	Pubmed	0.0007785	1	0.002026	0.02011	1	1	EGFR
Pubmed	20805868	Serum dipeptidyl peptidase-4 activity in insulin resistant patients with non-alcoholic fatty liver disease: a novel liver disease biomarker.	Pubmed	0.0007785	1	0.002026	0.02011	1	1	DPP4
Pubmed	16240846	An epidermal growth factor receptor intron 1 polymorphism in healthy women in Poland.	Pubmed	0.0007785	1	0.002026	0.02011	1	1	EGFR
Pubmed	7630400	Epithelial immaturity and multiorgan failure in mice lacking epidermal growth factor receptor.	Pubmed	0.0007785	1	0.002026	0.02011	1	1	EGFR
Pubmed	16984414	Pore-forming Staphylococcus aureus alpha-toxin triggers epidermal growth factor receptor-dependent proliferation.	Pubmed	0.0007785	1	0.002026	0.02011	1	1	EGFR
Pubmed	19115345	Generation and validation of mice carrying a conditional allele of the epidermal growth factor receptor.	Pubmed	0.0007785	1	0.002026	0.02011	1	1	EGFR
Pubmed	28443496	A novel epidermal growth factor receptor inhibitor for treating lung cancer.	Pubmed	0.0007785	1	0.002026	0.02011	1	1	EGFR
Pubmed	23491080	Utility of serum DNA and pyrosequencing for the detection of EGFR mutations in non-small cell lung cancer.	Pubmed	0.0007785	1	0.002026	0.02011	1	1	EGFR
Pubmed	21610522	Detection of epithelial growth factor receptor mutations in cerebrospinal fluid from patients with lung adenocarcinoma suspected of neoplastic meningitis.	Pubmed	0.0007785	1	0.002026	0.02011	1	1	EGFR
Pubmed	9464837	Processing of exogenous hepatitis B surface antigen particles for Ld-restricted epitope presentation depends on exogenous beta2-microglobulin.	Pubmed	0.0007785	1	0.002026	0.02011	1	1	B2M
Pubmed	25923550	Rociletinib in EGFR-mutated non-small-cell lung cancer.	Pubmed	0.0007785	1	0.002026	0.02011	1	1	EGFR
Pubmed	28885661	EGFR as a clinical marker in glioblastomas and other gliomas.	Pubmed	0.0007785	1	0.002026	0.02011	1	1	EGFR
Pubmed	10438944	Regulatory role of peritoneal NK1.1+ alpha beta T cells in IL-12 production during Salmonella infection.	Pubmed	0.0007785	1	0.002026	0.02011	1	1	B2M
Pubmed	28422286	Isorhapontigenin induced cell growth inhibition and apoptosis by targeting EGFR-related pathways in prostate cancer.	Pubmed	0.0007785	1	0.002026	0.02011	1	1	EGFR
Pubmed	30471391	Generation of humanized single-chain fragment variable immunotherapeutic against EGFR variant III using baculovirus expression system and in vitro validation.	Pubmed	0.0007785	1	0.002026	0.02011	1	1	EGFR
Pubmed	20826789	Plasma kallikrein promotes epidermal growth factor receptor transactivation and signaling in vascular smooth muscle through direct activation of protease-activated receptors.	Pubmed	0.0007785	1	0.002026	0.02011	1	1	EGFR
Pubmed	29191921	Selective EGFR (Epidermal Growth Factor Receptor) Deletion in Myeloid Cells Limits Atherosclerosis-Brief Report.	Pubmed	0.0007785	1	0.002026	0.02011	1	1	EGFR
Pubmed	21240462	Increase in clusterin forms part of the stress response in Hodgkin's lymphoma.	Pubmed	0.0007785	1	0.002026	0.02011	1	1	CLU
Pubmed	18413808	Molecular analysis of metaplastic breast carcinoma: high EGFR copy number via aneusomy.	Pubmed	0.0007785	1	0.002026	0.02011	1	1	EGFR
Pubmed	21264542	Cell membrane and cytoplasmic epidermal growth factor receptor expression in pancreatic ductal adenocarcinoma.	Pubmed	0.0007785	1	0.002026	0.02011	1	1	EGFR
Pubmed	17130473	Downregulation of EGF receptor signaling in pancreatic islets causes diabetes due to impaired postnatal beta-cell growth.	Pubmed	0.0007785	1	0.002026	0.02011	1	1	EGFR
Pubmed	23803112	Clinical outcomes and prognostic factors associated with the response to erlotinib in non-small-cell lung cancer patients with unknown EGFR mutational status.	Pubmed	0.0007785	1	0.002026	0.02011	1	1	EGFR
Pubmed	26448179	S100A9 expressed in ER(-)PgR(-) breast cancers induces inflammatory cytokines and is associated with an impaired overall survival.	Pubmed	0.0007785	1	0.002026	0.02011	1	1	S100A9
Pubmed	15247015	Functional analysis of clusterin/apolipoprotein J in cellular death induced by severe genotoxic stress.	Pubmed	0.0007785	1	0.002026	0.02011	1	1	CLU
Pubmed	18637032	Significant cytotoxic activity in vitro of the EGFR tyrosine kinase inhibitor gefitinib in acute myeloblastic leukaemia.	Pubmed	0.0007785	1	0.002026	0.02011	1	1	EGFR
Pubmed	25532027	A peptide antigen derived from EGFR T790M is immunogenic in non?small cell lung cancer.	Pubmed	0.0007785	1	0.002026	0.02011	1	1	EGFR
Pubmed	27241643	Extracellular matrix protein 1 gene (ECM1) mutations in nine Iranian families with lipoid proteinosis.	Pubmed	0.0007785	1	0.002026	0.02011	1	1	ECM1
Pubmed	26002322	Simultaneous topographic and recognition imaging of epidermal growth factor receptor (EGFR) on single human breast cancer cells.	Pubmed	0.0007785	1	0.002026	0.02011	1	1	EGFR
Pubmed	20614220	Clusterin immunoexpression and its clinical significance in patients with non-small cell lung cancer.	Pubmed	0.0007785	1	0.002026	0.02011	1	1	CLU
Pubmed	26702770	Occult abnormal pregnancies after first post-embryo transfer serum beta-human chorionic gonadotropin levels of 1.0-5.0 mIU/mL.	Pubmed	0.0007785	1	0.002026	0.02011	1	1	CGB3
Pubmed	12208476	Platelet collagen receptor GPIa (C807T/HPA-5) haplotype is not associated with an increased risk of fatal coronary events in middle-aged men.	Pubmed	0.0007785	1	0.002026	0.02011	1	1	ITGA2
Pubmed	29514240	Cellular uptake mediated by epidermal growth factor receptor facilitates the intracellular activity of phosphorothioate-modified antisense oligonucleotides.	Pubmed	0.0007785	1	0.002026	0.02011	1	1	EGFR
Pubmed	12628182	Functional expression of murine V2R pheromone receptors involves selective association with the M10 and M1 families of MHC class Ib molecules.	Pubmed	0.0007785	1	0.002026	0.02011	1	1	B2M
Pubmed	18632722	Epidermal growth factor receptor (EGFR) status and K-Ras mutations in colorectal cancer.	Pubmed	0.0007785	1	0.002026	0.02011	1	1	EGFR
Pubmed	26464643	Relationship between epidermal growth factor receptor (EGFR) mutation and serum cyclooxygenase-2 Level, and the synergistic effect of celecoxib and gefitinib on EGFR expression in non-small cell lung cancer cells.	Pubmed	0.0007785	1	0.002026	0.02011	1	1	EGFR
Pubmed	28427241	EGFR inhibition attenuates diabetic nephropathy through decreasing ROS and endoplasmic reticulum stress.	Pubmed	0.0007785	1	0.002026	0.02011	1	1	EGFR
Pubmed	24053674	Discovery of pteridin-7(8H)-one-based irreversible inhibitors targeting the epidermal growth factor receptor (EGFR) kinase T790M/L858R mutant.	Pubmed	0.0007785	1	0.002026	0.02011	1	1	EGFR
Pubmed	8879484	Apolipoprotein J/clusterin expression defines distinct stages of blastocyst implantation in the mouse uterus.	Pubmed	0.0007785	1	0.002026	0.02011	1	1	CLU
Pubmed	26179372	Reduced secreted clusterin as a mechanism for Alzheimer-associated CLU mutations.	Pubmed	0.0007785	1	0.002026	0.02011	1	1	CLU
Pubmed	19342999	Enediyne lidamycin enhances the effect of epidermal growth factor receptor tyrosine kinase inhibitor, gefitinib, in epidermoid carcinoma A431 cells and lung carcinoma H460 cells.	Pubmed	0.0007785	1	0.002026	0.02011	1	1	EGFR
Pubmed	17228128	Epidermal growth factor receptor inhibition strategies in pancreatic cancer: past, present and the future.	Pubmed	0.0007785	1	0.002026	0.02011	1	1	EGFR
Pubmed	28526474	Recent updates on third generation EGFR inhibitors and emergence of fourth generation EGFR inhibitors to combat C797S resistance.	Pubmed	0.0007785	1	0.002026	0.02011	1	1	EGFR
Pubmed	24367261	Toxoplasma gondii-induced activation of EGFR prevents autophagy protein-mediated killing of the parasite.	Pubmed	0.0007785	1	0.002026	0.02011	1	1	EGFR
Pubmed	16509252	Evaluation of beta2 microglobulin level as a marker to determine HIV/AIDS progression.	Pubmed	0.0007785	1	0.002026	0.02011	1	1	B2M
Pubmed	24002608	EGFR mutational status in a large series of Caucasian European NSCLC patients: data from daily practice.	Pubmed	0.0007785	1	0.002026	0.02011	1	1	EGFR
Pubmed	20008630	Impact of environmental tobacco smoke on the incidence of mutations in epidermal growth factor receptor gene in never-smoker patients with non-small-cell lung cancer.	Pubmed	0.0007785	1	0.002026	0.02011	1	1	EGFR
Pubmed	25077897	The HSP90 inhibitor ganetespib potentiates the antitumor activity of EGFR tyrosine kinase inhibition in mutant and wild-type non-small cell lung cancer.	Pubmed	0.0007785	1	0.002026	0.02011	1	1	EGFR
Pubmed	29540329	Assessment of EGFR mutation status in Tunisian patients with pulmonary adenocarcinoma.	Pubmed	0.0007785	1	0.002026	0.02011	1	1	EGFR
Pubmed	24996046	Apolipoprotein J, a glucose-upregulated molecular chaperone, stabilizes core and NS5A to promote infectious hepatitis C virus virion production.	Pubmed	0.0007785	1	0.002026	0.02011	1	1	CLU
Pubmed	25915729	X-ray Crystallographic Structures of Oligomers of Peptides Derived from ?2-Microglobulin.	Pubmed	0.0007785	1	0.002026	0.02011	1	1	B2M
Pubmed	23892938	The CLU gene rs11136000 variant is significantly associated with Alzheimer's disease in Caucasian and Asian populations.	Pubmed	0.0007785	1	0.002026	0.02011	1	1	CLU
Pubmed	11395045	Glycoprotein Ia C807T polymorphism and risk of restenosis following coronary stenting.	Pubmed	0.0007785	1	0.002026	0.02011	1	1	ITGA2
Pubmed	11916499	A chromosomal region 7p11.2 transcript map: its development and application to the study of EGFR amplicons in glioblastoma.	Pubmed	0.0007785	1	0.002026	0.02011	1	1	EGFR
Pubmed	30866857	?2-microglobulin has a different regulatory molecular mechanism between ER	Pubmed	0.0007785	1	0.002026	0.02011	1	1	B2M
Pubmed	25569739	Fecal calprotectin for evaluating postoperative recurrence of Crohn's disease: a meta-analysis of prospective studies.	Pubmed	0.0007785	1	0.002026	0.02011	1	1	S100A9
Pubmed	22029973	The soluble biomarker calprotectin (an S100 protein) is associated to ultrasonographic synovitis scores and is sensitive to change in patients with rheumatoid arthritis treated with adalimumab.	Pubmed	0.0007785	1	0.002026	0.02011	1	1	S100A9
Pubmed	30183078	Proteogenomic systems analysis identifies targeted therapy resistance mechanisms in EGFR-mutated lung cancer.	Pubmed	0.0007785	1	0.002026	0.02011	1	1	EGFR
Pubmed	26041721	Exon 19 deletion was associated with better survival outcomes in advanced lung adenocarcinoma with mutant EGFR treated with EGFR-TKIs as second-line therapy after first-line chemotherapy: a retrospective analysis of 128 patients.	Pubmed	0.0007785	1	0.002026	0.02011	1	1	EGFR
Pubmed	17685929	Protein expression and mutational analysis of epidermal growth factor receptor in renal angiomyolipomas.	Pubmed	0.0007785	1	0.002026	0.02011	1	1	EGFR
Pubmed	20060271	Cutaneous consequences of inhibiting EGF receptor signaling in vivo: normal hair follicle development, but retarded hair cycle induction and inhibition of adipocyte growth in Egfr(Wa5) mice.	Pubmed	0.0007785	1	0.002026	0.02011	1	1	EGFR
Pubmed	28060728	Influence of EGFR mutational status on metastatic behavior in non squamous non small cell lung cancer.	Pubmed	0.0007785	1	0.002026	0.02011	1	1	EGFR
Pubmed	1831565	Requirement for positive selection of gamma delta receptor-bearing T cells.	Pubmed	0.0007785	1	0.002026	0.02011	1	1	B2M
Pubmed	18208805	Epidermal growth factor receptor expression and gene copy number in conventional hepatocellular carcinoma.	Pubmed	0.0007785	1	0.002026	0.02011	1	1	EGFR
Pubmed	22101934	Mechanistic insights into the activation of oncogenic forms of EGF receptor.	Pubmed	0.0007785	1	0.002026	0.02011	1	1	EGFR
Pubmed	23110940	EGFR mutations are associated with favorable intracranial response and progression-free survival following brain irradiation in non-small cell lung cancer patients with brain metastases.	Pubmed	0.0007785	1	0.002026	0.02011	1	1	EGFR
Pubmed	20653783	Pulmonary adenocarcinoma with microcystic histology and intratumoral heterogeneity of EGFR gene polymorphism.	Pubmed	0.0007785	1	0.002026	0.02011	1	1	EGFR
Pubmed	28222666	Dynamic tracing for epidermal growth factor receptor mutations in urinary circulating DNA in gastric cancer patients.	Pubmed	0.0007785	1	0.002026	0.02011	1	1	EGFR
Pubmed	20075514	Soluble CD26 levels and its association to epidemiologic parameters in a sample population.	Pubmed	0.0007785	1	0.002026	0.02011	1	1	DPP4
Pubmed	22838504	Presence of S100A9-positive inflammatory cells in cancer tissues correlates with an early stage cancer and a better prognosis in patients with gastric cancer.	Pubmed	0.0007785	1	0.002026	0.02011	1	1	S100A9
Pubmed	27044906	Pretransplant ?2-Microglobulin Is Associated with the Risk of Acute Graft-versus-Host-Disease after Allogeneic Hematopoietic Cell Transplant.	Pubmed	0.0007785	1	0.002026	0.02011	1	1	B2M
Pubmed	19609951	Frequency of and variables associated with the EGFR mutation and its subtypes.	Pubmed	0.0007785	1	0.002026	0.02011	1	1	EGFR
Pubmed	29153095	Circulating cell-free DNA mutation patterns in early and late stage colon and pancreatic cancer.	Pubmed	0.0007785	1	0.002026	0.02011	1	1	EGFR
Pubmed	18676744	Prospective study of the accuracy of EGFR mutational analysis by high-resolution melting analysis in small samples obtained from patients with non-small cell lung cancer.	Pubmed	0.0007785	1	0.002026	0.02011	1	1	EGFR
Pubmed	15215186	Adenosine down-regulates the surface expression of dipeptidyl peptidase IV on HT-29 human colorectal carcinoma cells: implications for cancer cell behavior.	Pubmed	0.0007785	1	0.002026	0.02011	1	1	DPP4
Pubmed	22677909	The peptide nucleic acid-locked nucleic acid polymerase chain reaction clamp-based test for epidermal growth factor receptor mutations in bronchoscopic cytological specimens of non-small cell lung cancer.	Pubmed	0.0007785	1	0.002026	0.02011	1	1	EGFR
Pubmed	25152277	Clinicopathological features and EGFR gene mutation status in elderly patients with resected non-small-cell lung cancer.	Pubmed	0.0007785	1	0.002026	0.02011	1	1	EGFR
Pubmed	31038025	Design and synthesis of novel 2,4-disubstituted aminopyrimidines: reversible non-covalent T790M EGFR inhibitors.	Pubmed	0.0007785	1	0.002026	0.02011	1	1	EGFR
Pubmed	26975422	Dipeptidyl peptidase-4 is highly expressed in bronchial epithelial cells of untreated asthma and it increases cell proliferation along with fibronectin production in airway constitutive cells.	Pubmed	0.0007785	1	0.002026	0.02011	1	1	DPP4
Pubmed	25691693	Changes in the EGFR amplification and EGFRvIII expression between paired primary and recurrent glioblastomas.	Pubmed	0.0007785	1	0.002026	0.02011	1	1	EGFR
Pubmed	27029725	[Validation steps for the detection of L858R mutation in EGFR gene by real time quantitative PCR].	Pubmed	0.0007785	1	0.002026	0.02011	1	1	EGFR
Pubmed	12675253	DPP IV, immune parameters, and psychometrical variables in patients with eating disorders.	Pubmed	0.0007785	1	0.002026	0.02011	1	1	DPP4
Pubmed	22056328	Normal epidermal growth factor receptor signaling is dispensable for bone anabolic effects of parathyroid hormone.	Pubmed	0.0007785	1	0.002026	0.02011	1	1	EGFR
Pubmed	21680035	Phosphorylation of EGFR measured with in situ proximity ligation assay: relationship to EGFR protein level and gene dosage in cervical cancer.	Pubmed	0.0007785	1	0.002026	0.02011	1	1	EGFR
Pubmed	25100247	?2-Microglobulin amyloid fibril-induced membrane disruption is enhanced by endosomal lipids and acidic pH.	Pubmed	0.0007785	1	0.002026	0.02011	1	1	B2M
Pubmed	15299093	Absence of the genetic variant Val79Met in human chorionic gonadotropin-beta gene 5 in five European populations.	Pubmed	0.0007785	1	0.002026	0.02011	1	1	CGB5
Pubmed	30242154	A conformational sensor based on genetic code expansion reveals an autocatalytic component in EGFR activation.	Pubmed	0.0007785	1	0.002026	0.02011	1	1	EGFR
Pubmed	3543125	Spontaneous deletion at the B2m locus: evidence for site-specific genetic rearrangement.	Pubmed	0.0007785	1	0.002026	0.02011	1	1	B2M
Pubmed	24474262	Pretreatment Dynamic Susceptibility Contrast MRI Perfusion in Glioblastoma: Prediction of EGFR Gene Amplification.	Pubmed	0.0007785	1	0.002026	0.02011	1	1	EGFR
Pubmed	29283308	Normal values for calprotectin in stool samples of infants from the population-based longitudinal born into life study.	Pubmed	0.0007785	1	0.002026	0.02011	1	1	S100A9
Pubmed	16352628	Peptide-induced immune protection of CD8+ T cell-deficient mice against Friend retrovirus-induced disease.	Pubmed	0.0007785	1	0.002026	0.02011	1	1	B2M
Pubmed	30760406	Origin of the T790M mutation and its impact on the clinical outcomes of patients with lung adenocarcinoma receiving EGFR-TKIs.	Pubmed	0.0007785	1	0.002026	0.02011	1	1	EGFR
Pubmed	23763474	EGFR expression and copy number changes in low T-stage oral squamous cell carcinomas.	Pubmed	0.0007785	1	0.002026	0.02011	1	1	EGFR
Pubmed	20056713	An EGFR autocrine loop encodes a slow-reacting but dominant mode of mechanotransduction in a polarized epithelium.	Pubmed	0.0007785	1	0.002026	0.02011	1	1	EGFR
Pubmed	24021599	Quantification of EGFR autoantibodies in the amplification phenomenon of HER2 in breast cancer.	Pubmed	0.0007785	1	0.002026	0.02011	1	1	EGFR
Pubmed	19129184	Epidermal growth factor-like repeats of thrombospondins activate phospholipase Cgamma and increase epithelial cell migration through indirect epidermal growth factor receptor activation.	Pubmed	0.0007785	1	0.002026	0.02011	1	1	EGFR
Pubmed	21994417	EGFR protein expression in non-small cell lung cancer predicts response to an EGFR tyrosine kinase inhibitor--a novel antibody for immunohistochemistry or AQUA technology.	Pubmed	0.0007785	1	0.002026	0.02011	1	1	EGFR
Pubmed	25923549	AZD9291 in EGFR inhibitor-resistant non-small-cell lung cancer.	Pubmed	0.0007785	1	0.002026	0.02011	1	1	EGFR
Pubmed	3039909	Receptors for epidermal growth factor and other polypeptide mitogens.	Pubmed	0.0007785	1	0.002026	0.02011	1	1	EGFR
Pubmed	16243431	High frequency of mutation of epidermal growth factor receptor in lung adenocarcinoma in Thailand.	Pubmed	0.0007785	1	0.002026	0.02011	1	1	EGFR
Pubmed	19692684	Screening for epidermal growth factor receptor mutations in lung cancer.	Pubmed	0.0007785	1	0.002026	0.02011	1	1	EGFR
Pubmed	21545357	Protein kinase C? phosphorylates occludin and promotes assembly of epithelial tight junctions.	Pubmed	0.0007785	1	0.002026	0.02011	1	1	PRKCZ
Pubmed	26862784	A Chronic Obstructive Pulmonary Disease Susceptibility Gene, FAM13A, Regulates Protein Stability of ?-Catenin.	Pubmed	0.0007785	1	0.002026	0.02011	1	1	FAM13A
Pubmed	28253871	Relationship between EGFR gene mutation and local metastasis of resectable lung adenocarcinoma.	Pubmed	0.0007785	1	0.002026	0.02011	1	1	EGFR
Pubmed	21512163	Consequences of epidermal growth factor receptor (ErbB1) loss for vascular smooth muscle cells from mice with targeted deletion of ErbB1.	Pubmed	0.0007785	1	0.002026	0.02011	1	1	EGFR
Pubmed	28213472	?2-Microglobulin participates in development of lung emphysema by inducing lung epithelial cell senescence.	Pubmed	0.0007785	1	0.002026	0.02011	1	1	B2M
Pubmed	12077281	Skin graft rejection elicited by beta 2-microglobulin as a minor transplantation antigen involves multiple effector pathways: role of Fas-Fas ligand interactions and Th2-dependent graft eosinophil infiltrates.	Pubmed	0.0007785	1	0.002026	0.02011	1	1	B2M
Pubmed	28724430	EGFR modulates monounsaturated fatty acid synthesis through phosphorylation of SCD1 in lung cancer.	Pubmed	0.0007785	1	0.002026	0.02011	1	1	EGFR
Pubmed	17336829	On the role of CD26 in CD4 memory T cells.	Pubmed	0.0007785	1	0.002026	0.02011	1	1	DPP4
Pubmed	3199068	The organization of the mouse Igh-V locus. Dispersion, interspersion, and the evolution of VH gene family clusters.	Pubmed	0.0007785	1	0.002026	0.02011	1	1	B2M
Pubmed	26872429	Reduced DPP4 activity improves insulin signaling in primary human adipocytes.	Pubmed	0.0007785	1	0.002026	0.02011	1	1	DPP4
Pubmed	29745081	Distribution of EGFR SNPs -191C/A and 181946G/A in patients with lung cancer depending on smoking status in the Republic of Srpska, Bosnia and Herzegovina.	Pubmed	0.0007785	1	0.002026	0.02011	1	1	EGFR
Pubmed	17573511	Assessment of epidermal growth factor receptor mutation by endobronchial ultrasound-guided transbronchial needle aspiration.	Pubmed	0.0007785	1	0.002026	0.02011	1	1	EGFR
Pubmed	11935304	Epidermal growth factor receptor expression in invasive thymoma.	Pubmed	0.0007785	1	0.002026	0.02011	1	1	EGFR
Pubmed	8094732	Cloning and functional expression of the T cell activation antigen CD26.	Pubmed	0.0007785	1	0.002026	0.02011	1	1	DPP4
Pubmed	21761117	Intracellular clusterin negatively regulates ovarian chemoresistance: compromised expression sensitizes ovarian cancer cells to paclitaxel.	Pubmed	0.0007785	1	0.002026	0.02011	1	1	CLU
Pubmed	19267104	Erlotinib in advanced well-differentiated thymic carcinoma with overexpression of EGFR: a case report.	Pubmed	0.0007785	1	0.002026	0.02011	1	1	EGFR
Pubmed	9501329	Characterization of the human extracellular matrix protein 1 gene on chromosome 1q21.	Pubmed	0.0007785	1	0.002026	0.02011	1	1	ECM1
Pubmed	18827621	Rapid detection of hotspot mutations in epidermal growth factor receptor by polymerase chain reaction facilitates the management of non-small cell lung cancer.	Pubmed	0.0007785	1	0.002026	0.02011	1	1	EGFR
Pubmed	15788655	Mutations in the tyrosine kinase domain of the epidermal growth factor receptor in non-small cell lung cancer.	Pubmed	0.0007785	1	0.002026	0.02011	1	1	EGFR
Pubmed	11882590	Dipeptidyl peptidase IV activity in patients with ACE-inhibitor-associated angioedema.	Pubmed	0.0007785	1	0.002026	0.02011	1	1	DPP4
Pubmed	8871671	RIP-beta 2-microglobulin transgene expression restores insulitis, but not diabetes, in beta 2-microglobulin null nonobese diabetic mice.	Pubmed	0.0007785	1	0.002026	0.02011	1	1	B2M
Pubmed	20388509	Oncogenic mutant forms of EGFR: lessons in signal transduction and targets for cancer therapy.	Pubmed	0.0007785	1	0.002026	0.02011	1	1	EGFR
Pubmed	17956637	Polymorphisms in the epidermal growth factor receptor gene and the risk of primary lung cancer: a case-control study.	Pubmed	0.0007785	1	0.002026	0.02011	1	1	EGFR
Pubmed	14506149	ERBB1 is amplified and overexpressed in high-grade diffusely infiltrative pediatric brain stem glioma.	Pubmed	0.0007785	1	0.002026	0.02011	1	1	EGFR
Pubmed	27980215	Guide to detecting epidermal growth factor receptor (EGFR) mutations in ctDNA of patients with advanced non-small-cell lung cancer.	Pubmed	0.0007785	1	0.002026	0.02011	1	1	EGFR
Pubmed	23115635	Regulation of epidermal growth factor receptor signaling and erlotinib sensitivity in head and neck cancer cells by miR-7.	Pubmed	0.0007785	1	0.002026	0.02011	1	1	EGFR
Pubmed	23099361	Aberrantly activated EGFR contributes to enhanced IL-8 expression in COPD airways epithelial cells via regulation of nuclear FoxO3A.	Pubmed	0.0007785	1	0.002026	0.02011	1	1	EGFR
Pubmed	21614532	Expression of CD26 and its association with dipeptidyl peptidase IV activity in lymphocytes of type 2 diabetes patients.	Pubmed	0.0007785	1	0.002026	0.02011	1	1	DPP4
Pubmed	29133960	Divergent roles for Clusterin in Lung Injury and Repair.	Pubmed	0.0007785	1	0.002026	0.02011	1	1	CLU
Pubmed	25651733	Fecal calprotectin levels in children is more tightly associated with histological than with macroscopic endoscopy findings.	Pubmed	0.0007785	1	0.002026	0.02011	1	1	S100A9
Pubmed	21525950	Increases in urinary albumin and beta2-microglobulin are independently associated with blood pressure in the Japanese general population: the Takahata Study.	Pubmed	0.0007785	1	0.002026	0.02011	1	1	B2M
Pubmed	1581354	cDNA sequence of the pregnancy-specific beta 1-glycoprotein-11s (PSG-11s).	Pubmed	0.0007785	1	0.002026	0.02011	1	1	PSG9
Pubmed	29362963	Prognostic Value of Exon 19 Versus 21 EGFR Mutations Varies According to Disease Stage in Surgically Resected Non-small Cell Lung Cancer Adenocarcinoma.	Pubmed	0.0007785	1	0.002026	0.02011	1	1	EGFR
Pubmed	23557218	High EGFR copy number predicts benefits from tyrosine kinase inhibitor treatment for non-small cell lung cancer patients with wild-type EGFR.	Pubmed	0.0007785	1	0.002026	0.02011	1	1	EGFR
Pubmed	22718763	Nonmuscle myosin II is required for internalization of the epidermal growth factor receptor and modulation of downstream signaling.	Pubmed	0.0007785	1	0.002026	0.02011	1	1	EGFR
Pubmed	2933589	Human blood platelets showing no response to collagen fail to express surface glycoprotein Ia.	Pubmed	0.0007785	1	0.002026	0.02011	1	1	ITGA2
Pubmed	24378644	Epidermal growth factor receptor mutations in lung adenocarcinoma.	Pubmed	0.0007785	1	0.002026	0.02011	1	1	EGFR
Pubmed	1390678	1H NMR assignments and secondary structure of human beta 2-microglobulin in solution.	Pubmed	0.0007785	1	0.002026	0.02011	1	1	B2M
Pubmed	21635547	Detection of low-level EGFR T790M mutation in lung cancer tissues.	Pubmed	0.0007785	1	0.002026	0.02011	1	1	EGFR
Pubmed	21107284	Prognostic and predictive value of epidermal growth factor receptor tyrosine kinase domain mutation status and gene copy number for adjuvant chemotherapy in non-small cell lung cancer.	Pubmed	0.0007785	1	0.002026	0.02011	1	1	EGFR
Pubmed	22902018	Seminal clusterin gene expression associated with seminal variables in fertile and infertile men.	Pubmed	0.0007785	1	0.002026	0.02011	1	1	CLU
Pubmed	15621729	Bi-directional signaling between gastrointestinal peptide hormone receptors and epidermal growth factor receptor.	Pubmed	0.0007785	1	0.002026	0.02011	1	1	EGFR
Pubmed	21156237	EGFR expression and gene copy number in triple-negative breast carcinoma.	Pubmed	0.0007785	1	0.002026	0.02011	1	1	EGFR
Pubmed	16697311	Genetic polymorphisms of platelet glycoprotein Ia and the risk for premature myocardial infarction: effects on the release of sCD40L during the acute phase of premature myocardial infarction.	Pubmed	0.0007785	1	0.002026	0.02011	1	1	ITGA2
Pubmed	24481594	Molecular dynamic simulations reveal the mechanism of binding between xanthine inhibitors and DPP-4.	Pubmed	0.0007785	1	0.002026	0.02011	1	1	DPP4
Pubmed	23894460	Role for the epidermal growth factor receptor in chemotherapy-induced alopecia.	Pubmed	0.0007785	1	0.002026	0.02011	1	1	EGFR
Pubmed	21478220	Integrative analysis of array-comparative genomic hybridisation and matched gene expression profiling data reveals novel genes with prognostic significance in oesophageal adenocarcinoma.	Pubmed	0.0007785	1	0.002026	0.02011	1	1	EGFR
Pubmed	19814590	Localization of the potential zonal marker clusterin in native cartilage and in tissue-engineered constructs.	Pubmed	0.0007785	1	0.002026	0.02011	1	1	CLU
Pubmed	18689726	Altered cellular immunity in transgenic mice with T cell-specific expression of human D4-guanine diphosphate-dissociation inhibitor (D4-GDI).	Pubmed	0.0007785	1	0.002026	0.02011	1	1	ARHGDIB
Pubmed	17229843	Beta cells cannot directly prime diabetogenic CD8 T cells in nonobese diabetic mice.	Pubmed	0.0007785	1	0.002026	0.02011	1	1	B2M
Pubmed	23929714	Connective tissue growth factor is a new ligand of epidermal growth factor receptor.	Pubmed	0.0007785	1	0.002026	0.02011	1	1	EGFR
Pubmed	19201842	Gammadelta T lymphocyte homeostasis is negatively regulated by beta2-microglobulin.	Pubmed	0.0007785	1	0.002026	0.02011	1	1	B2M
Pubmed	10490965	NK and CTL recognition of a single chain H-2Dd molecule: distinct sites of H-2Dd interact with NK and TCR.	Pubmed	0.0007785	1	0.002026	0.02011	1	1	B2M
Pubmed	23418492	PSG gene expression is up-regulated by lysine acetylation involving histone and nonhistone proteins.	Pubmed	0.0007785	1	0.002026	0.02011	1	1	PSG5
Pubmed	6165997	Complete amino acid sequence of murine beta 2-microglobulin: structural evidence for strain-related polymorphism.	Pubmed	0.0007785	1	0.002026	0.02011	1	1	B2M
Pubmed	23485129	Uncommon epidermal growth factor receptor mutations in non-small cell lung cancer and their mechanisms of EGFR tyrosine kinase inhibitors sensitivity and resistance.	Pubmed	0.0007785	1	0.002026	0.02011	1	1	EGFR
Pubmed	12480959	Cellular uptake of beta2M and AGE-beta2M in synovial fibroblasts and macrophages.	Pubmed	0.0007785	1	0.002026	0.02011	1	1	B2M
Pubmed	16555991	Race, gender and mutations in the prediction of anti-EGFR activity.	Pubmed	0.0007785	1	0.002026	0.02011	1	1	EGFR
Pubmed	27626317	Risk factors of brain metastasis during the course of EGFR-TKIs therapy for patients with EGFR-mutated advanced lung adenocarcinoma.	Pubmed	0.0007785	1	0.002026	0.02011	1	1	EGFR
Pubmed	25775907	[The relationship between EGFR mutation and clinico-pathological features of lung adenocarcinoma in residents of southern Russia].	Pubmed	0.0007785	1	0.002026	0.02011	1	1	EGFR
Pubmed	26239567	Plasma EGFR Mutation Detection Associated With Survival Outcomes in Advanced-Stage LungáCancer.	Pubmed	0.0007785	1	0.002026	0.02011	1	1	EGFR
Pubmed	19330625	Expression of EGFRvIII in thyroid carcinoma: immunohistochemical study by camel antibodies.	Pubmed	0.0007785	1	0.002026	0.02011	1	1	EGFR
Pubmed	21436633	Epidermal growth factor receptor mutation in gastric cancer.	Pubmed	0.0007785	1	0.002026	0.02011	1	1	EGFR
Pubmed	19959837	Nanoscale imaging of epidermal growth factor receptor clustering: effects of inhibitors.	Pubmed	0.0007785	1	0.002026	0.02011	1	1	EGFR
Pubmed	21518140	GM3 suppresses anchorage-independent growth via Rho GDP dissociation inhibitor beta in melanoma B16 cells.	Pubmed	0.0007785	1	0.002026	0.02011	1	1	ARHGDIB
Pubmed	15649646	Differential effects of clusterin/apolipoprotein J on cellular growth and survival.	Pubmed	0.0007785	1	0.002026	0.02011	1	1	CLU
Pubmed	1370813	cDNA cloning for mouse thymocyte-activating molecule. A multifunctional ecto-dipeptidyl peptidase IV (CD26) included in a subgroup of serine proteases.	Pubmed	0.0007785	1	0.002026	0.02011	1	1	DPP4
Pubmed	28258739	Analysis of CT features and quantitative texture analysis in patients with lung adenocarcinoma: a correlation with EGFR mutations and survival rates.	Pubmed	0.0007785	1	0.002026	0.02011	1	1	EGFR
Pubmed	16585597	In vitro activation of CD8 interphotoreceptor retinoid-binding protein-specific T cells requires not only antigenic stimulation but also exogenous growth factors.	Pubmed	0.0007785	1	0.002026	0.02011	1	1	B2M
Pubmed	28388589	EGFR-induced phosphorylation of type I? phosphatidylinositol phosphate kinase promotes pancreatic cancer progression.	Pubmed	0.0007785	1	0.002026	0.02011	1	1	EGFR
Pubmed	17086201	Thymic selection threshold defined by compartmentalization of Ras/MAPK signalling.	Pubmed	0.0007785	1	0.002026	0.02011	1	1	B2M
Pubmed	23359693	Regulation of Hippo pathway by mitogenic growth factors via phosphoinositide 3-kinase and phosphoinositide-dependent kinase-1.	Pubmed	0.0007785	1	0.002026	0.02011	1	1	EGFR
Pubmed	18375831	Beta 2-microglobulin deficient mice catabolize IgG more rapidly than FcRn- alpha-chain deficient mice.	Pubmed	0.0007785	1	0.002026	0.02011	1	1	B2M
Pubmed	26497368	Mitochondrial translocation of EGFR regulates mitochondria dynamics and promotes metastasis in NSCLC.	Pubmed	0.0007785	1	0.002026	0.02011	1	1	EGFR
Pubmed	20723379	[EGFR Mutations Detection in Non-small Cell Lung Cancer Tissues by Real-time PCR and DNA Sequencing.].	Pubmed	0.0007785	1	0.002026	0.02011	1	1	EGFR
Pubmed	25179402	YAC tripeptide of epidermal growth factor promotes the proliferation of HaCaT keratinocytes through activation of EGFR.	Pubmed	0.0007785	1	0.002026	0.02011	1	1	EGFR
Pubmed	15040889	Expression of MRP14 gene is frequently down-regulated in Chinese human esophageal cancer.	Pubmed	0.0007785	1	0.002026	0.02011	1	1	S100A9
Pubmed	20619452	Hyperglycosylated hCG, a review.	Pubmed	0.0007785	1	0.002026	0.02011	1	1	CGB3
Pubmed	28385942	Epidermal growth factor receptor mutations should be considered as a prognostic factor for survival of patients with pathological fractures or painful bone metastases from non-small cell lung cancer.	Pubmed	0.0007785	1	0.002026	0.02011	1	1	EGFR
Pubmed	17195844	Peripheral antigen display by lymph node stroma promotes T cell tolerance to intestinal self.	Pubmed	0.0007785	1	0.002026	0.02011	1	1	B2M
Pubmed	27447901	Prostate Cancer in African American Men: The Effect of Androgens and microRNAs on Epidermal Growth Factor Signaling.	Pubmed	0.0007785	1	0.002026	0.02011	1	1	EGFR
Pubmed	22072864	Quantum dot-based quantitative immunofluorescence detection and spectrum analysis of epidermal growth factor receptor in breast cancer tissue arrays.	Pubmed	0.0007785	1	0.002026	0.02011	1	1	EGFR
Pubmed	19393661	Competition between intramolecular and intermolecular interactions in an amyloid-forming protein.	Pubmed	0.0007785	1	0.002026	0.02011	1	1	B2M
Pubmed	12167632	Binding of two nuclear complexes to a novel regulatory element within the human S100A9 promoter drives the S100A9 gene expression.	Pubmed	0.0007785	1	0.002026	0.02011	1	1	S100A9
Pubmed	22490401	Correlation of epidermal growth factor receptor overexpression with increased epidermal growth factor receptor gene copy number in esophageal squamous cell carcinomas.	Pubmed	0.0007785	1	0.002026	0.02011	1	1	EGFR
Pubmed	10066740	Clusterin has chaperone-like activity similar to that of small heat shock proteins.	Pubmed	0.0007785	1	0.002026	0.02011	1	1	CLU
Pubmed	21352589	The association between EGFR variant III, HPV, p16, c-MET, EGFR gene copy number and response to EGFR inhibitors in patients with recurrent or metastatic squamous cell carcinoma of the head and neck.	Pubmed	0.0007785	1	0.002026	0.02011	1	1	EGFR
Pubmed	28552765	Comprehensive Analysis of the Discordance of EGFR Mutation Status between Tumor Tissues and Matched Circulating Tumor DNA in Advanced Non-Small Cell Lung Cancer.	Pubmed	0.0007785	1	0.002026	0.02011	1	1	EGFR
Pubmed	27888377	Correlation between status of epidermal growth factor receptor mutation and distant metastases of lung adenocarcinoma upon initial diagnosis based on 1063 patients in China.	Pubmed	0.0007785	1	0.002026	0.02011	1	1	EGFR
Pubmed	7540943	In the absence of a CD40 signal, B cells are tolerogenic.	Pubmed	0.0007785	1	0.002026	0.02011	1	1	B2M
Pubmed	9858514	Immunization of mice with urease vaccine affords protection against Helicobacter pylori infection in the absence of antibodies and is mediated by MHC class II-restricted responses.	Pubmed	0.0007785	1	0.002026	0.02011	1	1	B2M
Pubmed	23939378	EGFR inhibition promotes an aggressive invasion pattern mediated by mesenchymal-like tumor cells within squamous cell carcinomas.	Pubmed	0.0007785	1	0.002026	0.02011	1	1	EGFR
Pubmed	11160274	Activated p56lck directs maturation of both CD4 and CD8 single-positive thymocytes.	Pubmed	0.0007785	1	0.002026	0.02011	1	1	B2M
Pubmed	15298855	Ultrafine carbon black particles stimulate proliferation of human airway epithelium via EGF receptor-mediated signaling pathway.	Pubmed	0.0007785	1	0.002026	0.02011	1	1	EGFR
Pubmed	20662519	Magic angle spinning NMR analysis of beta2-microglobulin amyloid fibrils in two distinct morphologies.	Pubmed	0.0007785	1	0.002026	0.02011	1	1	B2M
Pubmed	21353371	Phenotypic expression, body mass index and insulin resistance in relation to LH levels in women with polycystic ovary syndrome.	Pubmed	0.0007785	1	0.002026	0.02011	1	1	LHB
Pubmed	22056021	EGFR expression as a predictor of survival for first-line chemotherapy plus cetuximab in patients with advanced non-small-cell lung cancer: analysis of data from the phase 3 FLEX study.	Pubmed	0.0007785	1	0.002026	0.02011	1	1	EGFR
Pubmed	12145205	Role of zeta PKC in B-cell signaling and function.	Pubmed	0.0007785	1	0.002026	0.02011	1	1	PRKCZ
Pubmed	23822636	Inverse correlation between Thr-669 and constitutive tyrosine phosphorylation in the asymmetric epidermal growth factor receptor dimer conformation.	Pubmed	0.0007785	1	0.002026	0.02011	1	1	EGFR
Pubmed	12040015	An Otx-related homeodomain protein binds an LHbeta promoter element important for activation during gonadotrope maturation.	Pubmed	0.0007785	1	0.002026	0.02011	1	1	LHB
Pubmed	28185061	A regional analysis of epidermal growth factor receptor (EGFR) mutated lung cancer for HSE South.	Pubmed	0.0007785	1	0.002026	0.02011	1	1	EGFR
Pubmed	16166341	Differential effect of imipenem treatment on injury caused by cecal ligation and puncture in wild-type and NK cell-deficient beta(2)-microgloblin knockout mice.	Pubmed	0.0007785	1	0.002026	0.02011	1	1	B2M
Pubmed	22253789	S100A9 is a biliary protein marker of disease activity in primary sclerosing cholangitis.	Pubmed	0.0007785	1	0.002026	0.02011	1	1	S100A9
Pubmed	21738950	Increased levels of calprotectin in obesity are related to macrophage content: impact on inflammation and effect of weight loss.	Pubmed	0.0007785	1	0.002026	0.02011	1	1	S100A9
Pubmed	24895124	Activation of epidermal growth factor receptor mediates mucin production stimulated by p40, a Lactobacillus rhamnosus GG-derived protein.	Pubmed	0.0007785	1	0.002026	0.02011	1	1	EGFR
Pubmed	17455987	Polymorphisms, mutations, and amplification of the EGFR gene in non-small cell lung cancers.	Pubmed	0.0007785	1	0.002026	0.02011	1	1	EGFR
Pubmed	26826312	Production and characterization of domain-specific monoclonal antibodies against human ECM1.	Pubmed	0.0007785	1	0.002026	0.02011	1	1	ECM1
Pubmed	6160572	Immunofluorescent localization of placental lactogen, chorionic gonadotrophin and its alpha and beta subunits in organ cultures of human placenta.	Pubmed	0.0007785	1	0.002026	0.02011	1	1	CGB3
Pubmed	8920884	Defective iron homeostasis in beta 2-microglobulin knockout mice recapitulates hereditary hemochromatosis in man.	Pubmed	0.0007785	1	0.002026	0.02011	1	1	B2M
Pubmed	20939067	Matrix stiffness regulation of integrin-mediated mechanotransduction during osteogenic differentiation of human mesenchymal stem cells.	Pubmed	0.0007785	1	0.002026	0.02011	1	1	ITGA2
Pubmed	14551192	Epidermal growth factor induction of phenotype-dependent cell cycle arrest in vascular smooth muscle cells is through the mitogen-activated protein kinase pathway.	Pubmed	0.0007785	1	0.002026	0.02011	1	1	EGFR
Pubmed	19614729	Epidermal growth factor receptor (EGFR) expression in periocular and extraocular sebaceous carcinoma.	Pubmed	0.0007785	1	0.002026	0.02011	1	1	EGFR
Pubmed	27438047	Prognostic Impact of Epidermal Growth Factor Receptor Overexpression in Patients with Cervical Cancer: A Meta-Analysis.	Pubmed	0.0007785	1	0.002026	0.02011	1	1	EGFR
Pubmed	10395662	Activation of the extracellular signal-related kinase/mitogen-activated protein kinase pathway discriminates CD4 versus CD8 lineage commitment in the thymus.	Pubmed	0.0007785	1	0.002026	0.02011	1	1	B2M
Pubmed	27321309	Visceral fat obesity increases serum DPP-4 levels in men with type 2 diabetes mellitus.	Pubmed	0.0007785	1	0.002026	0.02011	1	1	DPP4
Pubmed	27105879	The Frequency of EGFR Mutation in Lung Adenocarcinoma and the Efficacy of Tyrosine Kinase Inhibitor Therapy in a Hungarian Cohort of Patients.	Pubmed	0.0007785	1	0.002026	0.02011	1	1	EGFR
Pubmed	18827605	Epidermal growth factor receptor intron-1 polymorphism predicts gefitinib outcome in advanced non-small cell lung cancer.	Pubmed	0.0007785	1	0.002026	0.02011	1	1	EGFR
Pubmed	29222872	Comparison of therapeutic effects of EGFR-tyrosine kinase inhibitors on 19Del and L858R mutations in advanced lung adenocarcinoma and effect on cellular immune function.	Pubmed	0.0007785	1	0.002026	0.02011	1	1	EGFR
Pubmed	17534386	Association of integrin alpha2 gene variants with ischemic stroke.	Pubmed	0.0007785	1	0.002026	0.02011	1	1	ITGA2
Pubmed	24190582	The role of the transcription factor ETV5 in insulin exocytosis.	Pubmed	0.0007785	1	0.002026	0.02011	1	1	ETV5
Pubmed	23001506	Interferon-inducible guanylate binding protein (GBP2) is associated with better prognosis in breast cancer and indicates an efficient T cell response.	Pubmed	0.0007785	1	0.002026	0.02011	1	1	GBP2
Pubmed	12750472	Beta cell MHC class I is a late requirement for diabetes.	Pubmed	0.0007785	1	0.002026	0.02011	1	1	B2M
Pubmed	22393153	Inhibition of epidermal growth factor receptor tyrosine kinase ameliorates collagen-induced arthritis.	Pubmed	0.0007785	1	0.002026	0.02011	1	1	EGFR
Pubmed	16109531	Inhibitory effect of EGFR antisense oligodeoxynucleotide on human hepatoma cell line.	Pubmed	0.0007785	1	0.002026	0.02011	1	1	EGFR
Pubmed	24457318	Clinical predictors of response to EGFR tyrosine kinase inhibitors in patients with EGFR-mutant non-small cell lung cancer.	Pubmed	0.0007785	1	0.002026	0.02011	1	1	EGFR
Pubmed	26646697	Overexpression of wildtype EGFR is tumorigenic and denotes a therapeutic target in non-small cell lung cancer.	Pubmed	0.0007785	1	0.002026	0.02011	1	1	EGFR
Pubmed	29802850	Crystal structure of EGFR T790M/C797S/V948R in complex with EAI045.	Pubmed	0.0007785	1	0.002026	0.02011	1	1	EGFR
Pubmed	17157295	Identification of a novel EGF-sensitive cell cycle checkpoint.	Pubmed	0.0007785	1	0.002026	0.02011	1	1	EGFR
Pubmed	17825525	EGFR plays a pivotal role in the regulation of polyamine-dependent apoptosis in intestinal epithelial cells.	Pubmed	0.0007785	1	0.002026	0.02011	1	1	EGFR
Pubmed	23063136	Enzymatic activity of DPIV and renin-angiotensin system (RAS) proteases in patients with left ventricular dysfunction and primary prevention implantable cardioverter/defibrillator (ICD).	Pubmed	0.0007785	1	0.002026	0.02011	1	1	DPP4
Pubmed	24913109	Identifying EGFR mutations from SCLC patient plasma by mutant-enriched liquidchip technology.	Pubmed	0.0007785	1	0.002026	0.02011	1	1	EGFR
Pubmed	19501580	Purification of three major forms of beta-hCG from urine and production of polyclonal antibodies against them.	Pubmed	0.0007785	1	0.002026	0.02011	1	1	CGB3
Pubmed	12516095	Complete loss of HLA class I antigen expression on melanoma cells: a result of successive mutational events.	Pubmed	0.0007785	1	0.002026	0.02011	1	1	B2M
Pubmed	25239875	Frequency of EGFR mutations in lung adenocarcinoma with malignant pleural effusion: Implication of cancer biological behaviour regulated by EGFR mutation.	Pubmed	0.0007785	1	0.002026	0.02011	1	1	EGFR
Pubmed	18683191	Inverse relationship between the length of the EGFR CA repeat polymorphism in lung carcinoma and protein expression of EGFR in the carcinoma.	Pubmed	0.0007785	1	0.002026	0.02011	1	1	EGFR
Pubmed	21761335	Discovery and validation of breast cancer early detection biomarkers in preclinical samples.	Pubmed	0.0007785	1	0.002026	0.02011	1	1	EGFR
Pubmed	9367673	The human extracellular matrix gene 1 (ECM1): genomic structure, cDNA cloning, expression pattern, and chromosomal localization.	Pubmed	0.0007785	1	0.002026	0.02011	1	1	ECM1
Pubmed	20670598	Nuclear mode of the EGFR signaling network: biology, prognostic value, and therapeutic implications.	Pubmed	0.0007785	1	0.002026	0.02011	1	1	EGFR
Pubmed	23937608	EGFR mutations in US Hispanic versus non-Hispanic white patients with lung adenocarcinoma.	Pubmed	0.0007785	1	0.002026	0.02011	1	1	EGFR
Pubmed	16103229	Reaching out for signals: filopodia sense EGF and respond by directed retrograde transport of activated receptors.	Pubmed	0.0007785	1	0.002026	0.02011	1	1	EGFR
Pubmed	26339400	EGFR expression in pancreatic intraepithelial neoplasia and ductal adenocarcinoma.	Pubmed	0.0007785	1	0.002026	0.02011	1	1	EGFR
Pubmed	18541260	EGFR polymorphism of the kinase domain in Japanese lung cancer.	Pubmed	0.0007785	1	0.002026	0.02011	1	1	EGFR
Pubmed	22573488	EGFR exon 19 in-frame deletion and polymorphisms of DNA repair genes in never-smoking female lung adenocarcinoma patients.	Pubmed	0.0007785	1	0.002026	0.02011	1	1	EGFR
Pubmed	17989432	The antiapoptotic protein clusterin protects cardiomyocytes against ischemia-induced cell death.	Pubmed	0.0007785	1	0.002026	0.02011	1	1	CLU
Pubmed	21159244	[The correlation between the expression of EGFR in tumor tissue and in peripheral blood in non-small cell lung cancer patients].	Pubmed	0.0007785	1	0.002026	0.02011	1	1	EGFR
Pubmed	19150933	Epidermal growth factor receptor as a potential therapeutic target in triple-negative breast cancer.	Pubmed	0.0007785	1	0.002026	0.02011	1	1	EGFR
Pubmed	26482819	Increased extracellular clusterin in the prefrontal cortex in schizophrenia.	Pubmed	0.0007785	1	0.002026	0.02011	1	1	CLU
Pubmed	28211129	Detection of SERPINB7 mutation can distinguish Nagashima-type palmoplantar keratoderma from other keratodermas with palmoplantar lesions.	Pubmed	0.0007785	1	0.002026	0.02011	1	1	SERPINB7
Pubmed	8152800	Molecular cloning and characterization of human ERM, a new member of the Ets family closely related to mouse PEA3 and ER81 transcription factors.	Pubmed	0.0007785	1	0.002026	0.02011	1	1	ETV5
Pubmed	15987782	Control of T helper 2 cell function and allergic airway inflammation by PKCzeta.	Pubmed	0.0007785	1	0.002026	0.02011	1	1	PRKCZ
Pubmed	22236192	Secreted clusterin in colon tumor cell models and its potential as diagnostic marker for colorectal cancer.	Pubmed	0.0007785	1	0.002026	0.02011	1	1	CLU
Pubmed	21953075	Functional mutation analysis of EGFR family genes and corresponding lymph node metastases in head and neck squamous cell carcinoma.	Pubmed	0.0007785	1	0.002026	0.02011	1	1	EGFR
Pubmed	12675238	On the role of dipeptidyl peptidase IV in the digestion of an immunodominant epitope in celiac disease.	Pubmed	0.0007785	1	0.002026	0.02011	1	1	DPP4
Pubmed	17270095	Elevated serum dipeptidyl peptidase IV activity in patients with chronic tonsillitis.	Pubmed	0.0007785	1	0.002026	0.02011	1	1	DPP4
Pubmed	18317075	Adenocarcinoma with epidermal growth factor receptor gene mutations in three siblings.	Pubmed	0.0007785	1	0.002026	0.02011	1	1	EGFR
Pubmed	14630624	Beta2-microglobulin knockout mice treated with anti-asialoGM1 exhibit improved hemodynamics and cardiac contractile function during acute intra-abdominal sepsis.	Pubmed	0.0007785	1	0.002026	0.02011	1	1	B2M
Pubmed	28181832	A tumor-targeting cRGD-EGFR siRNA conjugate and its anti-tumor effect on glioblastoma in vitro and in vivo.	Pubmed	0.0007785	1	0.002026	0.02011	1	1	EGFR
Pubmed	18288481	Endocytic downregulation of ErbB receptors: mechanisms and relevance in cancer.	Pubmed	0.0007785	1	0.002026	0.02011	1	1	EGFR
Pubmed	29506987	Investigating Novel Resistance Mechanisms to Third-Generation EGFR Tyrosine Kinase Inhibitor Osimertinib in Non-Small Cell Lung Cancer Patients.	Pubmed	0.0007785	1	0.002026	0.02011	1	1	EGFR
Pubmed	16303044	Epidermal growth factor receptor and proliferating cell nuclear antigen expression in urine ThinPrep specimens.	Pubmed	0.0007785	1	0.002026	0.02011	1	1	EGFR
Pubmed	19844187	Epidermal growth factor receptor mutation and pathologic-radiologic correlation between multiple lung nodules with ground-glass opacity differentiates multicentric origin from intrapulmonary spread.	Pubmed	0.0007785	1	0.002026	0.02011	1	1	EGFR
Pubmed	30625213	Efficacy, safety, and resistance profile of osimertinib in T790M mutation-positive non-small cell lung cancer in real-world practice.	Pubmed	0.0007785	1	0.002026	0.02011	1	1	EGFR
Pubmed	7903710	[Immunohistochemical study of the coexpression of epidermal growth factor receptor (EGFR) and c-erbB-2 protein in colorectal cancer].	Pubmed	0.0007785	1	0.002026	0.02011	1	1	EGFR
Pubmed	18379359	Evidence for disease control with erlotinib after gefitinib failure in typical gefitinib-sensitive Asian patients with non-small cell lung cancer.	Pubmed	0.0007785	1	0.002026	0.02011	1	1	EGFR
Pubmed	17429313	Intron 1 CA dinucleotide repeat polymorphism and mutations of epidermal growth factor receptor and gefitinib responsiveness in non-small-cell lung cancer.	Pubmed	0.0007785	1	0.002026	0.02011	1	1	EGFR
Pubmed	27017828	Molecular basis for multimerization in the activation of the epidermal growth factor receptor.	Pubmed	0.0007785	1	0.002026	0.02011	1	1	EGFR
Pubmed	22683352	The monomer-seed interaction mechanism in the formation of the ?2-microglobulin amyloid fibril clarified by solution NMR techniques.	Pubmed	0.0007785	1	0.002026	0.02011	1	1	B2M
Pubmed	21078436	The epidermal growth factor receptor pathway in relation to pelvic lymph node metastasis and survival in early-stage cervical cancer.	Pubmed	0.0007785	1	0.002026	0.02011	1	1	EGFR
Pubmed	20236686	The close correlation between 8-hydroxy-2'-deoxyguanosine and epidermal growth factor receptor activating mutation in non-small cell lung cancer.	Pubmed	0.0007785	1	0.002026	0.02011	1	1	EGFR
Pubmed	25778308	EGFR mutations in patients with non small-cell lung cancer in Bulgaria and treatment with gefitinib.	Pubmed	0.0007785	1	0.002026	0.02011	1	1	EGFR
Pubmed	12475899	Epidermal growth factor receptor trans-activation mediates the tonic and fibrogenic effects of endothelin in the aortic wall of transgenic mice.	Pubmed	0.0007785	1	0.002026	0.02011	1	1	EGFR
Pubmed	24288349	Immunohistochemical evaluation of EGFR expression in lip squamous cell carcinoma. Correlation with clinicopathological characteristics.	Pubmed	0.0007785	1	0.002026	0.02011	1	1	EGFR
Pubmed	27405981	Conservation of protein abundance patterns reveals the regulatory architecture of the EGFR-MAPK pathway.	Pubmed	0.0007785	1	0.002026	0.02011	1	1	EGFR
Pubmed	18000506	'Classical' but not 'other' mutations of EGFR kinase domain are associated with clinical outcome in gefitinib-treated patients with non-small cell lung cancer.	Pubmed	0.0007785	1	0.002026	0.02011	1	1	EGFR
Pubmed	17710732	The pleiotropic effects of excessive luteinizing hormone secretion in transgenic mice.	Pubmed	0.0007785	1	0.002026	0.02011	1	1	LHB
Pubmed	20303520	The EGFR polymorphism rs884419 is associated with freedom from recurrence in patients with resected prostate cancer.	Pubmed	0.0007785	1	0.002026	0.02011	1	1	EGFR
Pubmed	18714397	Clusterin interacts with Paclitaxel and confer Paclitaxel resistance in ovarian cancer.	Pubmed	0.0007785	1	0.002026	0.02011	1	1	CLU
Pubmed	21447104	Genetic association between clusterin polymorphisms and Alzheimer's disease in a Japanese population.	Pubmed	0.0007785	1	0.002026	0.02011	1	1	CLU
Pubmed	27461620	Frequency of epidermal growth factor receptor mutations in Jordanian lung adenocarcinoma patients at diagnosis.	Pubmed	0.0007785	1	0.002026	0.02011	1	1	EGFR
Pubmed	7565015	Mouse hepatitis virus A59-induced demyelination can occur in the absence of CD8+ T cells.	Pubmed	0.0007785	1	0.002026	0.02011	1	1	B2M
Pubmed	12920244	Motility analysis of pancreatic adenocarcinoma cells reveals a role for the atypical zeta isoform of protein kinase C in cancer cell movement.	Pubmed	0.0007785	1	0.002026	0.02011	1	1	PRKCZ
Pubmed	17290443	Absence of epidermal growth factor receptor gene mutations in patients with hormone refractory prostate cancer not responding to gefitinib.	Pubmed	0.0007785	1	0.002026	0.02011	1	1	EGFR
Pubmed	19875972	Correlation between epidermal growth factor receptor mutations and expression of female hormone receptors in East-Asian lung adenocarcinomas.	Pubmed	0.0007785	1	0.002026	0.02011	1	1	EGFR
Pubmed	15665299	Aberrant epidermal growth factor receptor signaling and enhanced sensitivity to EGFR inhibitors in lung cancer.	Pubmed	0.0007785	1	0.002026	0.02011	1	1	EGFR
Pubmed	15329413	EGF receptor gene mutations are common in lung cancers from "never smokers" and are associated with sensitivity of tumors to gefitinib and erlotinib.	Pubmed	0.0007785	1	0.002026	0.02011	1	1	EGFR
Pubmed	15173088	Reduced expression of metastasis suppressor RhoGDI2 is associated with decreased survival for patients with bladder cancer.	Pubmed	0.0007785	1	0.002026	0.02011	1	1	ARHGDIB
Pubmed	24980059	Graphene nanoribbons elicit cell specific uptake and delivery via activation of epidermal growth factor receptor enhanced by human papillomavirus E5 protein.	Pubmed	0.0007785	1	0.002026	0.02011	1	1	EGFR
Pubmed	17227223	Functional involvement of PHOSPHO1 in matrix vesicle-mediated skeletal mineralization.	Pubmed	0.0007785	1	0.002026	0.02011	1	1	PHOSPHO1
Pubmed	21094134	Acetylation of EGF receptor contributes to tumor cell resistance to histone deacetylase inhibitors.	Pubmed	0.0007785	1	0.002026	0.02011	1	1	EGFR
Pubmed	23935154	Cells with intense EGFR staining and a high nuclear to cytoplasmic ratio are specific for infiltrative glioma: a useful marker in neuropathological practice.	Pubmed	0.0007785	1	0.002026	0.02011	1	1	EGFR
Pubmed	29061303	Unique binding mode of Evogliptin with human dipeptidyl peptidase IV.	Pubmed	0.0007785	1	0.002026	0.02011	1	1	DPP4
Pubmed	17203167	EGFRvIII mutation in lung cancer correlates with increased EGFR copy number.	Pubmed	0.0007785	1	0.002026	0.02011	1	1	EGFR
Pubmed	25400722	Curcumin inhibits oral squamous cell carcinoma proliferation and invasion via EGFR signaling pathways.	Pubmed	0.0007785	1	0.002026	0.02011	1	1	EGFR
Pubmed	28199988	Clinicopathologic and prognostic significance of human epidermal growth factor receptor in patients with gastric cancer: An updated meta-analysis.	Pubmed	0.0007785	1	0.002026	0.02011	1	1	EGFR
Pubmed	15791650	Dys-regulation of clusterin in human hepatoma is not associated with tumorigenesis but is secondary to cell response to external tresses.	Pubmed	0.0007785	1	0.002026	0.02011	1	1	CLU
Pubmed	28222464	Regulation of Dipeptidyl Peptidase-4, its Substrate Chemokines, and Their Receptors in Adipose Tissue of ob/ob Mice.	Pubmed	0.0007785	1	0.002026	0.02011	1	1	DPP4
Pubmed	24408092	Factors associated with early progression of non-small-cell lung cancer treated by epidermal growth factor receptor tyrosine-kinase inhibitors.	Pubmed	0.0007785	1	0.002026	0.02011	1	1	EGFR
Pubmed	29180516	The EGFR odyssey - from activation to destruction in space and time.	Pubmed	0.0007785	1	0.002026	0.02011	1	1	EGFR
Pubmed	17561305	Mutation of the epidermal growth factor receptor gene in the development of adenocarcinoma of the lung.	Pubmed	0.0007785	1	0.002026	0.02011	1	1	EGFR
Pubmed	23558893	Mutation analysis of the EGFR gene and downstream signalling pathway in histologic samples of malignant pleural mesothelioma.	Pubmed	0.0007785	1	0.002026	0.02011	1	1	EGFR
Pubmed	16507511	Minimal contribution of desmethyl-gefitinib, the major human plasma metabolite of gefitinib, to epidermal growth factor receptor (EGFR)-mediated tumour growth inhibition.	Pubmed	0.0007785	1	0.002026	0.02011	1	1	EGFR
Pubmed	15867397	Chemoprevention of UV light-induced skin tumorigenesis by inhibition of the epidermal growth factor receptor.	Pubmed	0.0007785	1	0.002026	0.02011	1	1	EGFR
Pubmed	24880062	Alpha2beta1 integrin promotes T cell survival and migration through the concomitant activation of ERK/Mcl-1 and p38 MAPK pathways.	Pubmed	0.0007785	1	0.002026	0.02011	1	1	ITGA2
Pubmed	7645032	beta 2-Microglobulin in transplantation.	Pubmed	0.0007785	1	0.002026	0.02011	1	1	B2M
Pubmed	22847519	[Prognostic significance of changes of tumor epidermal growth factor receptor expression after neoadjuvant chemoradiation in patients with rectal adenocarcinoma].	Pubmed	0.0007785	1	0.002026	0.02011	1	1	EGFR
Pubmed	29278951	Calprotectin (S100A8/A9) should preferably be measured in EDTA-plasma; results from a longitudinal study of patients with rheumatoid arthritis.	Pubmed	0.0007785	1	0.002026	0.02011	1	1	S100A9
Pubmed	2543678	All autophosphorylation sites of epidermal growth factor (EGF) receptor and HER2/neu are located in their carboxyl-terminal tails. Identification of a novel site in EGF receptor.	Pubmed	0.0007785	1	0.002026	0.02011	1	1	EGFR
Pubmed	24117116	Plasma clusterin levels and the rs11136000 genotype in individuals with mild cognitive impairment and Alzheimer's disease.	Pubmed	0.0007785	1	0.002026	0.02011	1	1	CLU
Pubmed	12874352	Calprotectin, an abundant cytosolic protein from human polymorphonuclear leukocytes, inhibits the growth of Borrelia burgdorferi.	Pubmed	0.0007785	1	0.002026	0.02011	1	1	S100A9
Pubmed	18271921	Occurrence of mutations in the epidermal growth factor receptor gene in X-ray-induced rat lung tumors.	Pubmed	0.0007785	1	0.002026	0.02011	1	1	EGFR
Pubmed	17977975	Murine gammaherpesvirus 68 genes both induce and suppress lymphoproliferative disease.	Pubmed	0.0007785	1	0.002026	0.02011	1	1	B2M
Pubmed	28625621	Patterns of initial and intracranial failure in metastatic EGFR-mutant non-small cell lung cancer treated with erlotinib.	Pubmed	0.0007785	1	0.002026	0.02011	1	1	EGFR
Pubmed	21498106	Clinical significance of genetic alterations and expression of epidermal growth factor receptor (EGFR) in head and neck squamous cell carcinomas.	Pubmed	0.0007785	1	0.002026	0.02011	1	1	EGFR
Pubmed	17362940	Interferon gamma-dependent transactivation of epidermal growth factor receptor.	Pubmed	0.0007785	1	0.002026	0.02011	1	1	EGFR
Pubmed	19670535	Epidermal growth factor receptor gene copy number changes in lung cancer.	Pubmed	0.0007785	1	0.002026	0.02011	1	1	EGFR
Pubmed	20408943	EGFRvIII mRNA detection in the serum of patients with hepatocellular carcinoma.	Pubmed	0.0007785	1	0.002026	0.02011	1	1	EGFR
Pubmed	19143022	EGFR ligand switch in late stage prostate cancer contributes to changes in cell signaling and bone remodeling.	Pubmed	0.0007785	1	0.002026	0.02011	1	1	EGFR
Pubmed	27118309	Calprotectin could be a potential biomarker for acute appendicitis.	Pubmed	0.0007785	1	0.002026	0.02011	1	1	S100A9
Pubmed	18782770	Multiple mechanisms are responsible for transactivation of the epidermal growth factor receptor in mammary epithelial cells.	Pubmed	0.0007785	1	0.002026	0.02011	1	1	EGFR
Pubmed	23225576	High concordance of EGFR mutation status between histologic and corresponding cytologic specimens of lung adenocarcinomas.	Pubmed	0.0007785	1	0.002026	0.02011	1	1	EGFR
Pubmed	28426875	Bisphenol A activates EGFR and ERK promoting proliferation, tumor spheroid formation and resistance to EGFR pathway inhibition in estrogen receptor-negative inflammatory breast cancer cells.	Pubmed	0.0007785	1	0.002026	0.02011	1	1	EGFR
Pubmed	16273187	Remarkably high frequency of EGFR expression in breast carcinomas with squamous differentiation.	Pubmed	0.0007785	1	0.002026	0.02011	1	1	EGFR
Pubmed	26022577	Validation of a locked nucleic acid based wild-type blocking PCR for the detection of EGFR exon 18/19 mutations.	Pubmed	0.0007785	1	0.002026	0.02011	1	1	EGFR
Pubmed	17091451	[Expression of DPP4 gene in papillary thyroid carcinoma].	Pubmed	0.0007785	1	0.002026	0.02011	1	1	DPP4
Pubmed	29292709	A review on adverse event profiles of epidermal growth factor receptor-tyrosine kinase inhibitors in nonsmall cell lung cancer patients.	Pubmed	0.0007785	1	0.002026	0.02011	1	1	EGFR
Pubmed	20622897	Epidermal growth factor receptor variant III mediates head and neck cancer cell invasion via STAT3 activation.	Pubmed	0.0007785	1	0.002026	0.02011	1	1	EGFR
Pubmed	23201481	Unglycosylated clusterin variant accumulates in the endoplasmic reticulum and induces cytotoxicity.	Pubmed	0.0007785	1	0.002026	0.02011	1	1	CLU
Pubmed	26146634	Dipeptidyl Peptidase 4: A New Link between Diabetes Mellitus and Atherosclerosis?	Pubmed	0.0007785	1	0.002026	0.02011	1	1	DPP4
Pubmed	22911753	Androgen-responsive microRNAs in mouse Sertoli cells.	Pubmed	0.0007785	1	0.002026	0.02011	1	1	LHB
Pubmed	22029196	Evaluation of antitumor activity of gefitinib in pediatric glioblastoma and neuroblastoma cells.	Pubmed	0.0007785	1	0.002026	0.02011	1	1	EGFR
Pubmed	20471049	Epidermal growth factor receptor signaling modulates chemokine (CXC) ligand 5 expression and is associated with villus angiogenesis after small bowel resection.	Pubmed	0.0007785	1	0.002026	0.02011	1	1	EGFR
Pubmed	16513317	Association of platelet glycoprotein Ia polymorphism with minor increase of risk for oral cancer.	Pubmed	0.0007785	1	0.002026	0.02011	1	1	ITGA2
Pubmed	18998063	Novel and existing mutations in the tyrosine kinase domain of the epidermal growth factor receptor are predictors of optimal resectability in malignant peritoneal mesothelioma.	Pubmed	0.0007785	1	0.002026	0.02011	1	1	EGFR
Pubmed	24407590	Epidermal growth factor receptor plays a role in the regulation of liver and plasma lipid levels in adult male mice.	Pubmed	0.0007785	1	0.002026	0.02011	1	1	EGFR
Pubmed	7989765	IL-2-dependent NK cell responses discovered in virus-infected beta 2-microglobulin-deficient mice.	Pubmed	0.0007785	1	0.002026	0.02011	1	1	B2M
Pubmed	26666825	A synonymous EGFR polymorphism predicting responsiveness to anti-EGFR therapy in metastatic colorectal cancer patients.	Pubmed	0.0007785	1	0.002026	0.02011	1	1	EGFR
Pubmed	22256804	RAS mutations in cutaneous squamous-cell carcinomas in patients treated with BRAF inhibitors.	Pubmed	0.0007785	1	0.002026	0.02011	1	1	EGFR
Pubmed	25259789	Clinical significance of serum epidermal growth factor receptor (EGFR) levels in patients with breast cancer.	Pubmed	0.0007785	1	0.002026	0.02011	1	1	EGFR
Pubmed	27223425	Moderate and strong static magnetic fields directly affect EGFR kinase domain orientation to inhibit cancer cell proliferation.	Pubmed	0.0007785	1	0.002026	0.02011	1	1	EGFR
Pubmed	19096323	Erlotinib combined with cyclosporine in a liver-transplant recipient with epidermal growth factor receptor-mutated non-small cell lung cancer.	Pubmed	0.0007785	1	0.002026	0.02011	1	1	EGFR
Pubmed	26716903	High efficacy of third generation EGFR inhibitor AZD9291 in a leptomeningeal carcinomatosis model with EGFR-mutant lung cancer cells.	Pubmed	0.0007785	1	0.002026	0.02011	1	1	EGFR
Pubmed	29982425	Nitric oxide-donating aspirin (NO-Aspirin) suppresses lung tumorigenesis in vitro and in vivo and these effects are associated with modulation of the EGFR signaling pathway.	Pubmed	0.0007785	1	0.002026	0.02011	1	1	EGFR
Pubmed	8102208	Development of mature CD8+ thymocytes: selection rather than instruction?	Pubmed	0.0007785	1	0.002026	0.02011	1	1	B2M
Pubmed	30789914	Novel role of extracellular matrix protein 1 (ECM1) in cardiac aging and myocardial infarction.	Pubmed	0.0007785	1	0.002026	0.02011	1	1	ECM1
Pubmed	11865066	Apolipoprotein J/clusterin prevents a progressive glomerulopathy of aging.	Pubmed	0.0007785	1	0.002026	0.02011	1	1	CLU
Pubmed	27795435	CD8+ T Cells and Macrophages Regulate Pathogenesis in a Mouse Model of Middle East Respiratory Syndrome.	Pubmed	0.0007785	1	0.002026	0.02011	1	1	DPP4
Pubmed	16814379	Defective chemoattractant-induced calcium signalling in S100A9 null neutrophils.	Pubmed	0.0007785	1	0.002026	0.02011	1	1	S100A9
Pubmed	10319864	Epidermal growth factor receptor function is necessary for normal craniofacial development and palate closure.	Pubmed	0.0007785	1	0.002026	0.02011	1	1	EGFR
Pubmed	25684509	Frequency of EGFR mutations in non-small cell lung cancer patients: screening data from West Siberia.	Pubmed	0.0007785	1	0.002026	0.02011	1	1	EGFR
Pubmed	19265688	Epidermal growth factor receptor gene polymorphisms, R497K, but not (CA)n repeat, is associated with dilated cardiomyopathy.	Pubmed	0.0007785	1	0.002026	0.02011	1	1	EGFR
Pubmed	10912502	Effect of B2m gene disruption on MHC-determined odortypes.	Pubmed	0.0007785	1	0.002026	0.02011	1	1	B2M
Pubmed	16114106	Role of the aryl hydrocarbon receptor in thymocyte emigration in vivo.	Pubmed	0.0007785	1	0.002026	0.02011	1	1	S100A9
Pubmed	24964874	EGFR mutation testing practice in advanced non-small cell lung cancer.	Pubmed	0.0007785	1	0.002026	0.02011	1	1	EGFR
Pubmed	20454458	PKMzeta inhibition reverses learning-induced increases in hippocampal synaptic strength and memory during trace eyeblink conditioning.	Pubmed	0.0007785	1	0.002026	0.02011	1	1	PRKCZ
Pubmed	29393480	Sensitivity to chemotherapeutics of NSCLC cells with acquired resistance to EGFR-TKIs is mediated by T790M mutation or epithelial-mesenchymal transition.	Pubmed	0.0007785	1	0.002026	0.02011	1	1	EGFR
Pubmed	1988448	Contributory effects of de novo transcription and premature transcript termination in the regulation of human epidermal growth factor receptor proto-oncogene RNA synthesis.	Pubmed	0.0007785	1	0.002026	0.02011	1	1	EGFR
Pubmed	30347000	Calprotectin as a smoldering activity detection tool and renal prognosis biomarker in ANCA associated vasculitis.	Pubmed	0.0007785	1	0.002026	0.02011	1	1	S100A9
Pubmed	24248816	Prognostic value of epidermal growth factor receptor mutations in resected lung adenocarcinomas.	Pubmed	0.0007785	1	0.002026	0.02011	1	1	EGFR
Pubmed	29486179	Epidermal Growth Factor Receptor Mutation as a Risk Factor for Recurrence in Lung Adenocarcinoma.	Pubmed	0.0007785	1	0.002026	0.02011	1	1	EGFR
Pubmed	19380829	An atypical protein kinase C (PKC zeta) plays a critical role in lipopolysaccharide-activated NF-kappa B in human peripheral blood monocytes and macrophages.	Pubmed	0.0007785	1	0.002026	0.02011	1	1	PRKCZ
Pubmed	26762413	Mutation analysis of EGFR and its correlation with the HPV in Indian cervical cancer patients.	Pubmed	0.0007785	1	0.002026	0.02011	1	1	EGFR
Pubmed	29394136	EGFR expression in circulating tumor cells from high-grade metastatic soft tissue sarcomas.	Pubmed	0.0007785	1	0.002026	0.02011	1	1	EGFR
Pubmed	23486063	Dipeptidyl peptidase 4 is a functional receptor for the emerging human coronavirus-EMC.	Pubmed	0.0007785	1	0.002026	0.02011	1	1	DPP4
Pubmed	29331088	Significance of circulatory DPP4 activity in metabolic diseases.	Pubmed	0.0007785	1	0.002026	0.02011	1	1	DPP4
Pubmed	14718659	Crystal structure of human dipeptidyl peptidase IV in complex with a decapeptide reveals details on substrate specificity and tetrahedral intermediate formation.	Pubmed	0.0007785	1	0.002026	0.02011	1	1	DPP4
Pubmed	15016810	CR1/CR2 interactions modulate the functions of the cell surface epidermal growth factor receptor.	Pubmed	0.0007785	1	0.002026	0.02011	1	1	EGFR
Pubmed	14702346	Sorting of ligand-activated epidermal growth factor receptor to lysosomes requires its actin-binding domain.	Pubmed	0.0007785	1	0.002026	0.02011	1	1	EGFR
Pubmed	15389641	Transactivation of the epidermal growth factor receptor mediates muscarinic stimulation of focal adhesion kinase in intestinal epithelial cells.	Pubmed	0.0007785	1	0.002026	0.02011	1	1	EGFR
Pubmed	9710452	A mesangium-predominant gene, megsin, is a new serpin upregulated in IgA nephropathy.	Pubmed	0.0007785	1	0.002026	0.02011	1	1	SERPINB7
Pubmed	20739666	HER1 signaling mediates extravillous trophoblast differentiation in humans.	Pubmed	0.0007785	1	0.002026	0.02011	1	1	EGFR
Pubmed	29797219	Loss of EGFR confers acquired resistance to AZD9291 in an EGFR-mutant non-small cell lung cancer cell line with an epithelial-mesenchymal transition phenotype.	Pubmed	0.0007785	1	0.002026	0.02011	1	1	EGFR
Pubmed	21262375	Biofunctionalization of a generic collagenous triple helix with the ?2?1 integrin binding site allows molecular force measurements.	Pubmed	0.0007785	1	0.002026	0.02011	1	1	ITGA2
Pubmed	15754331	Development and resolution of experimental colitis in mice with targeted deletion of dipeptidyl peptidase IV.	Pubmed	0.0007785	1	0.002026	0.02011	1	1	DPP4
Pubmed	1903064	Characterization of a human high density lipoprotein-associated protein, NA1/NA2. Identity with SP-40,40, an inhibitor of complement-mediated cytolysis.	Pubmed	0.0007785	1	0.002026	0.02011	1	1	CLU
Pubmed	24349439	Propranolol restricts the mobility of single EGF-receptors on the cell surface before their internalization.	Pubmed	0.0007785	1	0.002026	0.02011	1	1	EGFR
Pubmed	18440823	Sensitive detection of EGFR mutations using a competitive probe to suppress background in the SMart Amplification Process.	Pubmed	0.0007785	1	0.002026	0.02011	1	1	EGFR
Pubmed	23160239	Dipeptidylpeptidase 4 negatively regulates colony-stimulating factor activity and stress hematopoiesis.	Pubmed	0.0007785	1	0.002026	0.02011	1	1	DPP4
Pubmed	28501897	MiR-181b modulates chemosensitivity of glioblastoma multiforme cells to temozolomide by targeting the epidermal growth factor receptor.	Pubmed	0.0007785	1	0.002026	0.02011	1	1	EGFR
Pubmed	2387594	Structure, evolution and chromosomal localization of the human pregnancy-specific beta 1-glycoprotein gene family.	Pubmed	0.0007785	1	0.002026	0.02011	1	1	PSG3
Pubmed	26536620	Dose-Dependent Mutation Rates Determine Optimum Erlotinib Dosing Strategies for EGFR Mutant Non-Small Cell Lung Cancer Patients.	Pubmed	0.0007785	1	0.002026	0.02011	1	1	EGFR
Pubmed	19190167	A two-stage case-control study of EGFR polymorphisms and breast cancer risk.	Pubmed	0.0007785	1	0.002026	0.02011	1	1	EGFR
Pubmed	23184393	Stem cell compartmentalization in diabetes and high cardiovascular risk reveals the role of DPP-4 in diabetic stem cell mobilopathy.	Pubmed	0.0007785	1	0.002026	0.02011	1	1	DPP4
Pubmed	23518631	Combined large cell neuroendocrine carcinoma and adenocarcinoma with epidermal growth factor receptor mutation in a female patient who never smoked.	Pubmed	0.0007785	1	0.002026	0.02011	1	1	EGFR
Pubmed	27516147	Pharmacological inhibition of protein kinase C (PKC)? downregulates the expression of cytokines involved in the pathogenesis of chronic obstructive pulmonary disease (COPD).	Pubmed	0.0007785	1	0.002026	0.02011	1	1	PRKCZ
Pubmed	29363250	Osimertinib in patients with epidermal growth factor receptor T790M advanced non-small cell lung cancer selected using cytology samples.	Pubmed	0.0007785	1	0.002026	0.02011	1	1	EGFR
Pubmed	11292659	Extracellular matrix protein 1 (ECM1) has angiogenic properties and is expressed by breast tumor cells.	Pubmed	0.0007785	1	0.002026	0.02011	1	1	ECM1
Pubmed	27262234	ErbB receptors and tetraspanins: Casting the net wider.	Pubmed	0.0007785	1	0.002026	0.02011	1	1	EGFR
Pubmed	16199108	Epidermal growth factor receptor gene mutation in non-small cell lung cancer using highly sensitive and fast TaqMan PCR assay.	Pubmed	0.0007785	1	0.002026	0.02011	1	1	EGFR
Pubmed	25789532	Immunohistochemical Localization of Wild-type EGFR, E746-A750 Frame Deletion in Exon 19, and L858R Point Mutation in Exon 21 in Triple-negative Breast Cancer.	Pubmed	0.0007785	1	0.002026	0.02011	1	1	EGFR
Pubmed	18992959	Prospective phase II study of gefitinib in non-small cell lung cancer with epidermal growth factor receptor gene mutations.	Pubmed	0.0007785	1	0.002026	0.02011	1	1	EGFR
Pubmed	21986139	Serum detection of epidermal growth factor receptor gene mutations using mutant-enriched sequencing in Chinese patients with advanced non-small cell lung cancer.	Pubmed	0.0007785	1	0.002026	0.02011	1	1	EGFR
Pubmed	30320363	Affibody?mediated imaging of EGFR expression in prostate cancer using radiocobalt?labeled DOTA?ZEGFR:2377.	Pubmed	0.0007785	1	0.002026	0.02011	1	1	EGFR
Pubmed	24391906	Stromal protein Ecm1 regulates ureteric bud patterning and branching.	Pubmed	0.0007785	1	0.002026	0.02011	1	1	ECM1
Pubmed	23945384	Association of exon 19 and 21 EGFR mutation patterns with treatment outcome after first-line tyrosine kinase inhibitor in metastatic non-small-cell lung cancer.	Pubmed	0.0007785	1	0.002026	0.02011	1	1	EGFR
Pubmed	28093244	Novel Mutations on EGFR Leu792 Potentially Correlate to Acquired Resistance to Osimertinib ináAdvanced NSCLC.	Pubmed	0.0007785	1	0.002026	0.02011	1	1	EGFR
Pubmed	2732223	Tyrosine phosphorylation of phospholipase C-II in vitro by the epidermal growth factor receptor.	Pubmed	0.0007785	1	0.002026	0.02011	1	1	EGFR
Pubmed	24247599	Expression of epidermal growth factor receptor by an experimental murine tumor of acute myeloid leukemia origin.	Pubmed	0.0007785	1	0.002026	0.02011	1	1	EGFR
Pubmed	22706608	Two generations of light/never-smokers with advanced adenocarcinoma of the lung with durable responses to erlotinib.	Pubmed	0.0007785	1	0.002026	0.02011	1	1	EGFR
Pubmed	24654822	Over-expression of EGFR is closely correlated to poor prognosis in Tunisian patients with non-small cell lung adenocarcinoma.	Pubmed	0.0007785	1	0.002026	0.02011	1	1	EGFR
Pubmed	20589169	Epidermal growth factor receptor gene amplification in atypical adenomatous hyperplasia of the lung.	Pubmed	0.0007785	1	0.002026	0.02011	1	1	EGFR
Pubmed	25605150	Epidermal growth factor receptor mutations in Japanese men with lung adenocarcinomas.	Pubmed	0.0007785	1	0.002026	0.02011	1	1	EGFR
Pubmed	8003489	Pregnancy-specific glycoprotein gene expression and the induction by 5-bromo-2'-deoxyuridine.	Pubmed	0.0007785	1	0.002026	0.02011	1	1	PSG4
Pubmed	23909080	Skeletal-related events in advanced lung adenocarcinoma patients evaluated EGFR mutations.	Pubmed	0.0007785	1	0.002026	0.02011	1	1	EGFR
Pubmed	28826599	Prognostic impacts of EGFR mutation status and subtype in patients with surgically resected lung adenocarcinoma.	Pubmed	0.0007785	1	0.002026	0.02011	1	1	EGFR
Pubmed	16788982	Mesenchymal transformation in epithelial ovarian tumor cells expressing epidermal growth factor receptor variant III.	Pubmed	0.0007785	1	0.002026	0.02011	1	1	EGFR
Pubmed	29152859	Deletion of the EGF receptor in vascular smooth muscle cells prevents chronic angiotensin II-induced arterial wall stiffening and media thickening.	Pubmed	0.0007785	1	0.002026	0.02011	1	1	EGFR
Pubmed	21718071	Structural insights into the pre-amyloid tetramer of ?-2-microglobulin from covalent labeling and mass spectrometry.	Pubmed	0.0007785	1	0.002026	0.02011	1	1	B2M
Pubmed	24727451	EGFR trans-activation mediates pleiotrophin-induced activation of Akt and Erk in cultured osteoblasts.	Pubmed	0.0007785	1	0.002026	0.02011	1	1	EGFR
Pubmed	10925270	Alpha beta TCR+ cells are a minimal fraction of peripheral CD8+ pool in MHC class I-deficient mice.	Pubmed	0.0007785	1	0.002026	0.02011	1	1	B2M
Pubmed	22964225	Molecular characterization of EGFR and EGFRvIII signaling networks in human glioblastoma tumor xenografts.	Pubmed	0.0007785	1	0.002026	0.02011	1	1	EGFR
Pubmed	28972394	Association Between Clusterin Gene Polymorphisms and Epilepsy in a Han Chinese Population.	Pubmed	0.0007785	1	0.002026	0.02011	1	1	CLU
Pubmed	30089595	Computed tomography characteristics of lung adenocarcinomas with epidermal growth factor receptor mutation: A propensity score matching study.	Pubmed	0.0007785	1	0.002026	0.02011	1	1	EGFR
Pubmed	29065153	Prognostic implication of EGFR gene mutations and histological classification in patients with resected stage I lung adenocarcinoma.	Pubmed	0.0007785	1	0.002026	0.02011	1	1	EGFR
Pubmed	20007348	Loss of clusterin expression worsens renal ischemia-reperfusion injury.	Pubmed	0.0007785	1	0.002026	0.02011	1	1	CLU
Pubmed	18676761	Lung cancer with epidermal growth factor receptor exon 20 mutations is associated with poor gefitinib treatment response.	Pubmed	0.0007785	1	0.002026	0.02011	1	1	EGFR
Pubmed	28170370	Development of a gene panel for next-generation sequencing of clinically relevant mutations in cell-free DNA from cancer patients.	Pubmed	0.0007785	1	0.002026	0.02011	1	1	EGFR
Pubmed	25446258	ECM1 promotes the Warburg effect through EGF-mediated activation of PKM2.	Pubmed	0.0007785	1	0.002026	0.02011	1	1	ECM1
Pubmed	28551654	Overexpression of EGFR as an Independent Prognostic Factor in Adenocarcinoma of the Esophagogastric Junction.	Pubmed	0.0007785	1	0.002026	0.02011	1	1	EGFR
Pubmed	29539615	Epidermal Growth Factor Receptor Regulation of Ewing Sarcoma Cell Function.	Pubmed	0.0007785	1	0.002026	0.02011	1	1	EGFR
Pubmed	20051017	Primary glioblastomas with and without EGFR amplification: relationship to genetic alterations and clinicopathological features.	Pubmed	0.0007785	1	0.002026	0.02011	1	1	EGFR
Pubmed	28120874	Clusterin: full-length protein and one of its chains show opposing effects on cellular lipid accumulation.	Pubmed	0.0007785	1	0.002026	0.02011	1	1	CLU
Pubmed	22793795	Energetics and mechanism of the normal-to-amyloidogenic isomerization of ?2-microglobulin: on-the-fly string method calculations.	Pubmed	0.0007785	1	0.002026	0.02011	1	1	B2M
Pubmed	18042729	Epidermal growth factor receptor juxtamembrane region regulates allosteric tyrosine kinase activation.	Pubmed	0.0007785	1	0.002026	0.02011	1	1	EGFR
Pubmed	20979823	[Influence of mutations in epidermal growth factor receptor gene on growth, metastasis and survival rate of non-small cell lung carcinoma].	Pubmed	0.0007785	1	0.002026	0.02011	1	1	EGFR
Pubmed	9531620	Adaptive response of iron absorption to anemia, increased erythropoiesis, iron deficiency, and iron loading in beta2-microglobulin knockout mice.	Pubmed	0.0007785	1	0.002026	0.02011	1	1	B2M
Pubmed	12175153	Enhanced affinity capture MALDI-TOF MS: orientation of an immunoglobulin G using recombinant protein G.	Pubmed	0.0007785	1	0.002026	0.02011	1	1	CGB3
Pubmed	19879421	The role of clusterin (CLU) in malignant transformation and drug resistance in breast carcinomas.	Pubmed	0.0007785	1	0.002026	0.02011	1	1	CLU
Pubmed	21099169	Loss of clusterin limits atherosclerosis in apolipoprotein E-deficient mice via reduced expression of Egr-1 and TNF-?.	Pubmed	0.0007785	1	0.002026	0.02011	1	1	CLU
Pubmed	24406864	High EGFR gene copy number predicts poor outcome in triple-negative breast cancer.	Pubmed	0.0007785	1	0.002026	0.02011	1	1	EGFR
Pubmed	27750111	A recombinant receptor-binding domain of MERS-CoV in trimeric form protects human dipeptidyl peptidase 4 (hDPP4) transgenic mice from MERS-CoV infection.	Pubmed	0.0007785	1	0.002026	0.02011	1	1	DPP4
Pubmed	30504065	PKC? Phosphorylates SIRT6 to Mediate Fatty Acid ?-Oxidation in Colon Cancer Cells.	Pubmed	0.0007785	1	0.002026	0.02011	1	1	PRKCZ
Pubmed	26768482	Picoliter-Droplet Digital Polymerase Chain Reaction-Based Analysis of Cell-Free Plasma DNA to Assess EGFR Mutations in Lung Adenocarcinoma That Confer Resistance to Tyrosine-Kinase Inhibitors.	Pubmed	0.0007785	1	0.002026	0.02011	1	1	EGFR
Pubmed	23033949	Signal transduction pathways of the epidermal growth factor receptor in colorectal cancer and their inhibition by small molecules.	Pubmed	0.0007785	1	0.002026	0.02011	1	1	EGFR
Pubmed	20075572	Efficacy of gefitinib for elderly patients with advanced non-small cell lung cancer harboring epidermal growth factor receptor gene mutations: a retrospective analysis.	Pubmed	0.0007785	1	0.002026	0.02011	1	1	EGFR
Pubmed	24748405	Comparison of ARMS and direct sequencing for detection of EGFR mutation and prediction of EGFR-TKI efficacy between surgery and biopsy tumor tissues in NSCLC patients.	Pubmed	0.0007785	1	0.002026	0.02011	1	1	EGFR
Pubmed	9307064	Immune responses in mice deficient in Ly-GDI, a lymphoid-specific regulator of Rho GTPases.	Pubmed	0.0007785	1	0.002026	0.02011	1	1	ARHGDIB
Pubmed	12107118	The alpha(2) integrin subunit-deficient mouse: a multifaceted phenotype including defects of branching morphogenesis and hemostasis.	Pubmed	0.0007785	1	0.002026	0.02011	1	1	ITGA2
Pubmed	25679064	Low frequency of EGFR mutations in pleural mesothelioma patients, Cologne, Germany.	Pubmed	0.0007785	1	0.002026	0.02011	1	1	EGFR
Pubmed	17186532	Identical epidermal growth factor receptor mutations in adenocarcinomatous and squamous cell carcinomatous components of adenosquamous carcinoma of the lung.	Pubmed	0.0007785	1	0.002026	0.02011	1	1	EGFR
Pubmed	21998749	Apolipoprotein J/Clusterin is a novel structural component of human erythrocytes and a biomarker of cellular stress and senescence.	Pubmed	0.0007785	1	0.002026	0.02011	1	1	CLU
Pubmed	14647423	Multiple G-protein-coupled receptor signals converge on the epidermal growth factor receptor to promote migration and invasion.	Pubmed	0.0007785	1	0.002026	0.02011	1	1	EGFR
Pubmed	11835340	Platelet glycoprotein Ia 807C/T (Phe224) and 873G/A (Thr246) dimorphisms in Turkey.	Pubmed	0.0007785	1	0.002026	0.02011	1	1	ITGA2
Pubmed	19017634	A comprehensive model for packing and hydration for amyloid fibrils of beta2-microglobulin.	Pubmed	0.0007785	1	0.002026	0.02011	1	1	B2M
Pubmed	20398370	Epidermal growth factor receptor gene copy number in 101 advanced colorectal cancer patients treated with chemotherapy plus cetuximab.	Pubmed	0.0007785	1	0.002026	0.02011	1	1	EGFR
Pubmed	22260689	The regulatory role of the juxtamembrane region in the activity of the epidermal growth factor receptor.	Pubmed	0.0007785	1	0.002026	0.02011	1	1	EGFR
Pubmed	29953622	Epidermal growth factor receptor and ligand family expression and activity in glioblastoma.	Pubmed	0.0007785	1	0.002026	0.02011	1	1	EGFR
Pubmed	26400330	Correlation of EGFR gene amplification with invasion and metastasis of non-small cell lung cancer.	Pubmed	0.0007785	1	0.002026	0.02011	1	1	EGFR
Pubmed	2985580	Identification of residues in the nucleotide binding site of the epidermal growth factor receptor/kinase.	Pubmed	0.0007785	1	0.002026	0.02011	1	1	EGFR
Pubmed	12386281	Mesangial cell-predominant gene, megsin.	Pubmed	0.0007785	1	0.002026	0.02011	1	1	SERPINB7
Pubmed	17203166	Gefitinib induces premature senescence in non-small cell lung cancer cells with or without EGFR gene mutation.	Pubmed	0.0007785	1	0.002026	0.02011	1	1	EGFR
Pubmed	16614884	Prognostic significance of epidermal growth factor receptor expression in colon cancer patients undergoing curative surgery.	Pubmed	0.0007785	1	0.002026	0.02011	1	1	EGFR
Pubmed	19841986	Molecular characterization of chronic obstructive pulmonary disease-related non-small cell lung cancer through aberrant methylation and alterations of EGFR signaling.	Pubmed	0.0007785	1	0.002026	0.02011	1	1	EGFR
Pubmed	25921002	High-dose erlotinib for refractory leptomeningeal metastases after failure of standard-dose EGFR-TKIs.	Pubmed	0.0007785	1	0.002026	0.02011	1	1	EGFR
Pubmed	20028750	Association of epidermal growth factor receptor polymorphism, skin toxicity, and outcome in patients with squamous cell carcinoma of the head and neck receiving cetuximab-docetaxel treatment.	Pubmed	0.0007785	1	0.002026	0.02011	1	1	EGFR
Pubmed	24295852	EGF receptor trafficking: consequences for signaling and cancer.	Pubmed	0.0007785	1	0.002026	0.02011	1	1	EGFR
Pubmed	21887704	The critical role of the epidermal growth factor receptor in endochondral ossification.	Pubmed	0.0007785	1	0.002026	0.02011	1	1	EGFR
Pubmed	22159129	Hippocampal function in healthy carriers of the CLU Alzheimer's disease risk variant.	Pubmed	0.0007785	1	0.002026	0.02011	1	1	CLU
Pubmed	16010411	Coexpression, prognostic significance and predictive value of EGFR, EGFRvIII and phosphorylated EGFR in colorectal cancer.	Pubmed	0.0007785	1	0.002026	0.02011	1	1	EGFR
Pubmed	17139196	Overexpression of human chorionic gonadotropin beta genes 3, 5 and 8 in tumor tissue and urinary cells of bladder cancer patients.	Pubmed	0.0007785	1	0.002026	0.02011	1	1	CGB3
Pubmed	9359832	Stress-induced transcription of the clusterin/apoJ gene.	Pubmed	0.0007785	1	0.002026	0.02011	1	1	CLU
Pubmed	18841160	Overexpression of beta2-microglobulin is associated with poor survival in patients with oral cavity squamous cell carcinoma and contributes to oral cancer cell migration and invasion.	Pubmed	0.0007785	1	0.002026	0.02011	1	1	B2M
Pubmed	30509096	High level EGFR amplification in a newly established glioblastoma cell line 170-MG-BA.	Pubmed	0.0007785	1	0.002026	0.02011	1	1	EGFR
Pubmed	17442853	An impaired breeding phenotype in mice with a genetic deletion of beta-2 microglobulin and diminished MHC class I expression: role in reproductive fitness.	Pubmed	0.0007785	1	0.002026	0.02011	1	1	B2M
Pubmed	27463019	Plasma MiRNA alterations between NSCLC patients harboring Del19 and L858R EGFR mutations.	Pubmed	0.0007785	1	0.002026	0.02011	1	1	EGFR
Pubmed	21532887	Identification of an exon 4-deletion variant of epidermal growth factor receptor with increased metastasis-promoting capacity.	Pubmed	0.0007785	1	0.002026	0.02011	1	1	EGFR
Pubmed	23022459	ErbB1 epidermal growth factor receptor is a valid target for reducing the effects of multiple inhibitors of axonal regeneration.	Pubmed	0.0007785	1	0.002026	0.02011	1	1	EGFR
Pubmed	17052295	Epidermal growth factor receptor mutations and susceptibility to targeted therapy in lung cancer.	Pubmed	0.0007785	1	0.002026	0.02011	1	1	EGFR
Pubmed	27004903	An epidermal growth factor receptor exon 19 mutation in a mucin-producing gastric cancer sample from a Chinese patient.	Pubmed	0.0007785	1	0.002026	0.02011	1	1	EGFR
Pubmed	21924037	[Role of EGFR mutation status in patients with stage III non-squamous non-small cell lung cancer treated with chemoradiotherapy].	Pubmed	0.0007785	1	0.002026	0.02011	1	1	EGFR
Pubmed	6174440	The presence of Ly-m11 alloantigen in mouse body fluids.	Pubmed	0.0007785	1	0.002026	0.02011	1	1	B2M
Pubmed	22797889	Establishment of a normal reference value for serum ?2 microglobulin in Japanese children: reevaluation of its clinical usefulness.	Pubmed	0.0007785	1	0.002026	0.02011	1	1	B2M
Pubmed	30413194	Epidermal growth factor expression as a predictor of chemotherapeutic resistance in muscle-invasive bladder cancer.	Pubmed	0.0007785	1	0.002026	0.02011	1	1	EGFR
Pubmed	25404271	[Clinical characteristics and outcomes of lung cancer patients ?with EGFR mutations in exons 19 and 21].	Pubmed	0.0007785	1	0.002026	0.02011	1	1	EGFR
Pubmed	9281391	Autoantibody production and cytokine profiles of MHC class I (beta2-microglobulin) gene deleted New Zealand black (NZB) mice.	Pubmed	0.0007785	1	0.002026	0.02011	1	1	B2M
Pubmed	8961276	The carboxy-terminal region of the beta-subunits of luteinizing hormone and chorionic gonadotropin differentially influence secretion and assembly of the heterodimers.	Pubmed	0.0007785	1	0.002026	0.02011	1	1	LHB
Pubmed	12906826	Structural basis of proline-specific exopeptidase activity as observed in human dipeptidyl peptidase-IV.	Pubmed	0.0007785	1	0.002026	0.02011	1	1	DPP4
Pubmed	19550250	Epidermal growth factor receptor exon 19 deletions predict complete regression of multiple intracranial metastases in two cases of non-small cell lung cancer treated with erlotinib.	Pubmed	0.0007785	1	0.002026	0.02011	1	1	EGFR
Pubmed	28212572	Concurrent gene alterations with EGFR mutation and treatment efficacy of EGFR-TKIs in Chinese patients with non-small cell lung cancer.	Pubmed	0.0007785	1	0.002026	0.02011	1	1	EGFR
Pubmed	27306810	[Association between Efficacy of Pemetrexed and EGFR Mutation Status for EGFR Mutated Lung Carcinoma].	Pubmed	0.0007785	1	0.002026	0.02011	1	1	EGFR
Pubmed	23819610	Cytosolic phosphorylated EGFR is predictive of recurrence in early stage penile cancer patients: a retropective study.	Pubmed	0.0007785	1	0.002026	0.02011	1	1	EGFR
Pubmed	16491092	Amyloid formation under physiological conditions proceeds via a native-like folding intermediate.	Pubmed	0.0007785	1	0.002026	0.02011	1	1	B2M
Pubmed	18425114	Intercellular transfer of the oncogenic receptor EGFRvIII by microvesicles derived from tumour cells.	Pubmed	0.0007785	1	0.002026	0.02011	1	1	EGFR
Pubmed	25456362	Dacomitinib as first-line treatment in patients with clinically or molecularly selected advanced non-small-cell lung cancer: a multicentre, open-label, phase 2 trial.	Pubmed	0.0007785	1	0.002026	0.02011	1	1	EGFR
Pubmed	22722798	Rare and novel epidermal growth factor receptor mutations in non-small-cell lung cancer and lack of clinical response to gefitinib in two cases.	Pubmed	0.0007785	1	0.002026	0.02011	1	1	EGFR
Pubmed	30895194	Identification of EGFR as a Novel Key Gene in Clear Cell Renal Cell Carcinoma (ccRCC) through Bioinformatics Analysis and Meta-Analysis.	Pubmed	0.0007785	1	0.002026	0.02011	1	1	EGFR
Pubmed	27166522	Tyrosine kinase receptor EGFR regulates the switch in cancer cells between cell survival and cell death induced by autophagy in hypoxia.	Pubmed	0.0007785	1	0.002026	0.02011	1	1	EGFR
Pubmed	17566601	To re-treat or not with gefitinib/erlotinib: This is the question for tyrosine kinase inhibitor-responsive lung cancers that progress.	Pubmed	0.0007785	1	0.002026	0.02011	1	1	EGFR
Pubmed	23391419	CD26 inhibition enhances perfusion recovery in ApoE-/-mice.	Pubmed	0.0007785	1	0.002026	0.02011	1	1	DPP4
Pubmed	22818908	The epidermal growth factor receptor as a therapeutic target in epithelial ovarian cancer.	Pubmed	0.0007785	1	0.002026	0.02011	1	1	EGFR
Pubmed	11169745	Molecular analysis of the mouse S100A9 gene and evidence that the myeloid specific transcription factor C/EBPepsilon is not required for the regulation of the S100A9/A8 gene expression in neutrophils.	Pubmed	0.0007785	1	0.002026	0.02011	1	1	S100A9
Pubmed	23638215	Overexpression of integrin a2 promotes osteogenic differentiation of hBMSCs from senile osteoporosis through the ERK pathway.	Pubmed	0.0007785	1	0.002026	0.02011	1	1	ITGA2
Pubmed	17149366	Transactivation of EGFR mediates insulin-stimulated ERK1/2 activation and enhanced cell migration in human corneal epithelial cells.	Pubmed	0.0007785	1	0.002026	0.02011	1	1	EGFR
Pubmed	17538889	Helicobacter pylori induces up-regulation of the epidermal growth factor receptor in AGS gastric epithelial cells.	Pubmed	0.0007785	1	0.002026	0.02011	1	1	EGFR
Pubmed	26564090	Lipoid proteinosis.	Pubmed	0.0007785	1	0.002026	0.02011	1	1	ECM1
Pubmed	22271412	Suppression of the epidermal growth factor receptor inhibits epithelial-mesenchymal transition in human pancreatic cancer PANC-1 cells.	Pubmed	0.0007785	1	0.002026	0.02011	1	1	EGFR
Pubmed	23904325	Structure of an early native-like intermediate of ?2-microglobulin amyloidogenesis.	Pubmed	0.0007785	1	0.002026	0.02011	1	1	B2M
Pubmed	18257814	Carpal tunnel syndrome and plasma beta2-microglobulin concentration in hemodialysis patients.	Pubmed	0.0007785	1	0.002026	0.02011	1	1	B2M
Pubmed	22231931	Tests of linkage and allelic association between markers in the 1p36 PRKCZ (protein kinase C zeta) gene region and bipolar affective disorder.	Pubmed	0.0007785	1	0.002026	0.02011	1	1	PRKCZ
Pubmed	19545444	The Ets dominant repressor En/Erm enhances intestinal epithelial tumorigenesis in ApcMin mice.	Pubmed	0.0007785	1	0.002026	0.02011	1	1	ETV5
Pubmed	26334838	Digital PCR analysis of plasma cell-free DNA for non-invasive detection of drug resistance mechanisms in EGFR mutant NSCLC: Correlation with paired tumor samples.	Pubmed	0.0007785	1	0.002026	0.02011	1	1	EGFR
Pubmed	24351833	EGFR mutations in surgically resected fresh specimens from 697 consecutive Chinese patients with non-small cell lung cancer and their relationships with clinical features.	Pubmed	0.0007785	1	0.002026	0.02011	1	1	EGFR
Pubmed	1352530	Cloning and functional expression of the T cell activation antigen CD26.	Pubmed	0.0007785	1	0.002026	0.02011	1	1	DPP4
Pubmed	24571650	Correlation of EGFR mutation status with predominant histologic subtype of adenocarcinoma according to the new lung adenocarcinoma classification of the International Association for the Study of Lung Cancer/American Thoracic Society/European Respiratory Society.	Pubmed	0.0007785	1	0.002026	0.02011	1	1	EGFR
Pubmed	21232804	Cellular immune activation markers neopterin and ?2-microglobulin are not elevated in the cerebrospinal fluid of patients with Creutzfeldt-Jakob disease.	Pubmed	0.0007785	1	0.002026	0.02011	1	1	B2M
Pubmed	17721643	Homozygous missense mutation in the ECM1 gene in Chinese siblings with lipoid proteinosis.	Pubmed	0.0007785	1	0.002026	0.02011	1	1	ECM1
Pubmed	11527413	Specific tissue distribution of megsin, a novel serpin, in the glomerulus and its up-regulation in IgA nephropathy.	Pubmed	0.0007785	1	0.002026	0.02011	1	1	SERPINB7
Pubmed	15524283	Nuclear translocation of EGF receptor regulated by Epstein-Barr virus encoded latent membrane protein 1.	Pubmed	0.0007785	1	0.002026	0.02011	1	1	EGFR
Pubmed	23273562	Family history of lung cancer in never smokers with non-small-cell lung cancer and its association with tumors harboring EGFR mutations.	Pubmed	0.0007785	1	0.002026	0.02011	1	1	EGFR
Pubmed	25063251	Maternal plasma levels of cell-free ?-HCG mRNA as a prenatal diagnostic indicator of placenta accrete.	Pubmed	0.0007785	1	0.002026	0.02011	1	1	CGB3
Pubmed	12603844	Extracellular matrix protein 1 gene (ECM1) mutations in lipoid proteinosis and genotype-phenotype correlation.	Pubmed	0.0007785	1	0.002026	0.02011	1	1	ECM1
Pubmed	21734795	Association between ITGA2 C807T polymorphism and gastric cancer risk.	Pubmed	0.0007785	1	0.002026	0.02011	1	1	ITGA2
Pubmed	30660448	Atypical protein kinase C isoforms differentially regulate directional keratinocyte migration during wound healing.	Pubmed	0.0007785	1	0.002026	0.02011	1	1	PRKCZ
Pubmed	3060434	Correlation of beta-2-microglobulin concentration changes to changes of distribution volume.	Pubmed	0.0007785	1	0.002026	0.02011	1	1	B2M
Pubmed	24493201	In vivo activation of the PI3K-Akt pathway in mouse beta cells by the EGFR mutation L858R protects against diabetes.	Pubmed	0.0007785	1	0.002026	0.02011	1	1	EGFR
Pubmed	17693474	Structure and aggregation mechanism of beta(2)-microglobulin (83-99) peptides studied by molecular dynamics simulations.	Pubmed	0.0007785	1	0.002026	0.02011	1	1	B2M
Pubmed	25292288	Characterization of ?2-microglobulin expression in different types of breast cancer.	Pubmed	0.0007785	1	0.002026	0.02011	1	1	B2M
Pubmed	24262203	Corticosteroid treatment of Alzheimer's disease: is S100A9/Mrp14 a key target?	Pubmed	0.0007785	1	0.002026	0.02011	1	1	S100A9
Pubmed	10065776	Role of the mutations Trp8 => Arg and Ile15 => Thr of the human luteinizing hormone beta-subunit in women with polycystic ovary syndrome.	Pubmed	0.0007785	1	0.002026	0.02011	1	1	LHB
Pubmed	1633114	Regulation of epidermal growth factor receptor gene expression in murine embryonal carcinoma cells.	Pubmed	0.0007785	1	0.002026	0.02011	1	1	EGFR
Pubmed	17487279	Quantitative analysis of mouse urine volatiles: in search of MHC-dependent differences.	Pubmed	0.0007785	1	0.002026	0.02011	1	1	B2M
Pubmed	19232323	A beta2-microglobulin cleavage variant fibrillates at near-physiological pH.	Pubmed	0.0007785	1	0.002026	0.02011	1	1	B2M
Pubmed	17224269	Clusterin over-expression modulates proapoptotic and antiproliferative effects of 1,25(OH)2D3 in prostate cancer cells in vitro.	Pubmed	0.0007785	1	0.002026	0.02011	1	1	CLU
Pubmed	21800041	EGFR expression in acquired middle ear cholesteatoma in children and adults.	Pubmed	0.0007785	1	0.002026	0.02011	1	1	EGFR
Pubmed	15538973	Ectopic expression of clusterin/apolipoprotein J or Bcl-2 decreases the sensitivity of HaCaT cells to toxic effects of ropivacaine.	Pubmed	0.0007785	1	0.002026	0.02011	1	1	CLU
Pubmed	16449241	A correlation between EGFR gene mutation status and bronchioloalveolar carcinoma features in Japanese patients with adenocarcinoma.	Pubmed	0.0007785	1	0.002026	0.02011	1	1	EGFR
Pubmed	11906815	Clusterin.	Pubmed	0.0007785	1	0.002026	0.02011	1	1	CLU
Pubmed	11892985	Overexpression of apolipoprotein J in human fibroblasts protects against cytotoxicity and premature senescence induced by ethanol and tert-butylhydroperoxide.	Pubmed	0.0007785	1	0.002026	0.02011	1	1	CLU
Pubmed	29097164	Improved detection of EGFR mutations in the tumor cells enriched from the malignant pleural effusion of non-small cell lung cancer patient.	Pubmed	0.0007785	1	0.002026	0.02011	1	1	EGFR
Pubmed	21831696	Relationship between epidermal growth factor receptor gene copy number and protein expression in oral cavity squamous cell carcinoma.	Pubmed	0.0007785	1	0.002026	0.02011	1	1	EGFR
Pubmed	16200342	Planning for intracavitary anti-EGFR radionuclide therapy of gliomas. Literature review and data on EGFR expression.	Pubmed	0.0007785	1	0.002026	0.02011	1	1	EGFR
Pubmed	17610364	Inhibition of CD26 in human cord blood CD34+ cells enhances their engraftment of nonobese diabetic/severe combined immunodeficiency mice.	Pubmed	0.0007785	1	0.002026	0.02011	1	1	DPP4
Pubmed	23717383	Serum levels of beta2-microglobulin and free light chains of immunoglobulins are associated with systemic disease activity in primary Sj÷gren's syndrome. Data at enrollment in the prospective ASSESS cohort.	Pubmed	0.0007785	1	0.002026	0.02011	1	1	B2M
Pubmed	25707740	Review: hCGs: different sources of production, different glycoforms and functions.	Pubmed	0.0007785	1	0.002026	0.02011	1	1	CGB3
Pubmed	26673020	The CLU-files: disentanglement of a mystery.	Pubmed	0.0007785	1	0.002026	0.02011	1	1	CLU
Pubmed	20552223	The different efficacy of gefitinib or erlotinib according to epidermal growth factor receptor exon 19 and exon 21 mutations in Korean non-small cell lung cancer patients.	Pubmed	0.0007785	1	0.002026	0.02011	1	1	EGFR
Pubmed	21847041	Erlotinib accumulation in brain metastases from non-small cell lung cancer: visualization by positron emission tomography in a patient harboring a mutation in the epidermal growth factor receptor.	Pubmed	0.0007785	1	0.002026	0.02011	1	1	EGFR
Pubmed	17699773	Epidermal growth factor receptors with tyrosine kinase domain mutations exhibit reduced Cbl association, poor ubiquitylation, and down-regulation but are efficiently internalized.	Pubmed	0.0007785	1	0.002026	0.02011	1	1	EGFR
Pubmed	21933587	Impact of smoking status and pathologic type on epidermal growth factor receptor mutations in lung cancer.	Pubmed	0.0007785	1	0.002026	0.02011	1	1	EGFR
Pubmed	21632096	No association between the ITGA2 807T allele and retinopathy in french patients with type 2 diabetes.	Pubmed	0.0007785	1	0.002026	0.02011	1	1	ITGA2
Pubmed	24485957	Association of Merkel cell polyomavirus infection with EGFR mutation status in Chinese non-small cell lung cancer patients.	Pubmed	0.0007785	1	0.002026	0.02011	1	1	EGFR
Pubmed	19696405	Protective role of clusterin/apolipoprotein J against neointimal hyperplasia via antiproliferative effect on vascular smooth muscle cells and cytoprotective effect on endothelial cells.	Pubmed	0.0007785	1	0.002026	0.02011	1	1	CLU
Pubmed	24412911	Low DPP4 expression and activity in multiple sclerosis.	Pubmed	0.0007785	1	0.002026	0.02011	1	1	DPP4
Pubmed	1552287	Skin graft rejection by beta 2-microglobulin-deficient mice.	Pubmed	0.0007785	1	0.002026	0.02011	1	1	B2M
Pubmed	22388283	Dipeptidyl peptidase-IV is a potential molecular biomarker in diabetic kidney disease.	Pubmed	0.0007785	1	0.002026	0.02011	1	1	DPP4
Pubmed	18558286	Gain of the EGFR gene located on 7p12 is a frequent and early event in squamous cell carcinoma of the lung.	Pubmed	0.0007785	1	0.002026	0.02011	1	1	EGFR
Pubmed	17982125	Human pancreatic secretory trypsin inhibitor stabilizes intestinal mucosa against noxious agents.	Pubmed	0.0007785	1	0.002026	0.02011	1	1	EGFR
Pubmed	26683696	EGFR/Ras Signaling Controls Drosophila Intestinal Stem Cell Proliferation via Capicua-Regulated Genes.	Pubmed	0.0007785	1	0.002026	0.02011	1	1	EGFR
Pubmed	21874828	Expression of membranous epidermal growth factor receptor in colorectal adenocarcinoma and its correlation with clinicopathological features.	Pubmed	0.0007785	1	0.002026	0.02011	1	1	EGFR
Pubmed	18186961	Different epidermal growth factor receptor gene mutations in a patient with 2 synchronous lung cancers.	Pubmed	0.0007785	1	0.002026	0.02011	1	1	EGFR
Pubmed	24707474	Trichostatin A suppresses EGFR expression through induction of microRNA-7 in an HDAC-independent manner in lapatinib-treated cells.	Pubmed	0.0007785	1	0.002026	0.02011	1	1	EGFR
Pubmed	19737945	EGFRvIII deletion mutations in pediatric high-grade glioma and response to targeted therapy in pediatric glioma cell lines.	Pubmed	0.0007785	1	0.002026	0.02011	1	1	EGFR
Pubmed	19060236	Good response to gefitinib in lung adenocarcinoma of complex epidermal growth factor receptor (EGFR) mutations with the classical mutation pattern.	Pubmed	0.0007785	1	0.002026	0.02011	1	1	EGFR
Pubmed	25813907	The obesity-associated transcription factor ETV5 modulates circulating glucocorticoids.	Pubmed	0.0007785	1	0.002026	0.02011	1	1	ETV5
Pubmed	8962717	Analysis of the glycosylation patterns of the extracellular domain of the epidermal growth factor receptor expressed in Chinese hamster ovary fibroblasts.	Pubmed	0.0007785	1	0.002026	0.02011	1	1	EGFR
Pubmed	30644388	Chi3l3 induces oligodendrogenesis in an experimental model of autoimmune neuroinflammation.	Pubmed	0.0007785	1	0.002026	0.02011	1	1	EGFR
Pubmed	21356164	The role of the epidermal growth factor receptor in the mechanism and treatment of colorectal cancer.	Pubmed	0.0007785	1	0.002026	0.02011	1	1	EGFR
Pubmed	20146086	High dose weekly erlotinib achieves therapeutic concentrations in CSF and is effective in leptomeningeal metastases from epidermal growth factor receptor mutant lung cancer.	Pubmed	0.0007785	1	0.002026	0.02011	1	1	EGFR
Pubmed	23728017	The Case | A hip fracture in a hemodialysis patient. Pathologic right-hip fracture from ?2-microglobulin amyloidosis.	Pubmed	0.0007785	1	0.002026	0.02011	1	1	B2M
Pubmed	30550608	Mechanisms of acquired resistance to afatinib clarified with liquid biopsy.	Pubmed	0.0007785	1	0.002026	0.02011	1	1	EGFR
Pubmed	30559409	Monensin inhibits cell proliferation and tumor growth of chemo-resistant pancreatic cancer cells by targeting the EGFR signaling pathway.	Pubmed	0.0007785	1	0.002026	0.02011	1	1	EGFR
Pubmed	29175506	CD26 expression is down-regulated on CD8	Pubmed	0.0007785	1	0.002026	0.02011	1	1	DPP4
Pubmed	17244786	The dipeptidyl peptidase IV inhibitor vildagliptin suppresses endogenous glucose production and enhances islet function after single-dose administration in type 2 diabetic patients.	Pubmed	0.0007785	1	0.002026	0.02011	1	1	DPP4
Pubmed	24222153	Clinical significance of erlotinib monotherapy for gefitinib-resistant non-small cell lung cancer with EGFR mutations.	Pubmed	0.0007785	1	0.002026	0.02011	1	1	EGFR
Pubmed	30759826	Cucurbitacin B Induces the Lysosomal Degradation of EGFR and Suppresses the CIP2A/PP2A/Akt Signaling Axis in Gefitinib-Resistant Non-Small Cell Lung Cancer.	Pubmed	0.0007785	1	0.002026	0.02011	1	1	EGFR
Pubmed	12527890	Differential requirement of EGF receptor and its tyrosine kinase for AP-1 transactivation induced by EGF and TPA.	Pubmed	0.0007785	1	0.002026	0.02011	1	1	EGFR
Pubmed	24885205	Correlation of survival and EGFR mutation with predominant histologic subtype according to the new lung adenocarcinoma classification in stage IB patients.	Pubmed	0.0007785	1	0.002026	0.02011	1	1	EGFR
Pubmed	29253572	Silencing of secretory clusterin sensitizes NSCLC cells to V-ATPase inhibitors by downregulating survivin.	Pubmed	0.0007785	1	0.002026	0.02011	1	1	CLU
Pubmed	22572014	Relationship between epidermal growth factor receptor gene mutation and copy number in Chinese patients with non-small cell lung cancer.	Pubmed	0.0007785	1	0.002026	0.02011	1	1	EGFR
Pubmed	18784990	Calgranulin B (S100A9) levels in bronchoalveolar lavage fluid of patients with interstitial lung diseases.	Pubmed	0.0007785	1	0.002026	0.02011	1	1	S100A9
Pubmed	25146938	Epidermal growth factor receptor (EGFR) exon 20 mutations in non-small-cell lung cancer and resistance to EGFR-tyrosine kinase inhibitors.	Pubmed	0.0007785	1	0.002026	0.02011	1	1	EGFR
Pubmed	19826035	Lung adenocarcinoma with EGFR amplification has distinct clinicopathologic and molecular features in never-smokers.	Pubmed	0.0007785	1	0.002026	0.02011	1	1	EGFR
Pubmed	21546482	Beta 2 microglobulin and the risk for cardiovascular events in patients with asymptomatic carotid atherosclerosis.	Pubmed	0.0007785	1	0.002026	0.02011	1	1	B2M
Pubmed	9707600	Differential thymic selection outcomes stimulated by focal structural alteration in peptide/major histocompatibility complex ligands.	Pubmed	0.0007785	1	0.002026	0.02011	1	1	B2M
Pubmed	20513767	Multiple mechanisms collectively regulate clathrin-mediated endocytosis of the epidermal growth factor receptor.	Pubmed	0.0007785	1	0.002026	0.02011	1	1	EGFR
Pubmed	26330164	Tuning Sensitivity of CAR to EGFR Density Limits Recognition of Normal Tissue While Maintaining Potent Antitumor Activity.	Pubmed	0.0007785	1	0.002026	0.02011	1	1	EGFR
Pubmed	18514801	Differential expression of clusterin according to histological type of endometrial carcinoma.	Pubmed	0.0007785	1	0.002026	0.02011	1	1	CLU
Pubmed	28573640	Expanding the search for significant EGFR mutations in NSCLC outside of the tyrosine kinase domain with next-generation sequencing.	Pubmed	0.0007785	1	0.002026	0.02011	1	1	EGFR
Pubmed	25986624	Prognostic Factors for Survival After Recurrence in Patients With Completely Resected Lung Adenocarcinoma: Important Roles of Epidermal Growth Factor Receptor Mutation Status and the Current Staging System.	Pubmed	0.0007785	1	0.002026	0.02011	1	1	EGFR
Pubmed	20697298	Novel epidermal growth factor receptor mutation-specific antibodies for non-small cell lung cancer: immunohistochemistry as a possible screening method for epidermal growth factor receptor mutations.	Pubmed	0.0007785	1	0.002026	0.02011	1	1	EGFR
Pubmed	16700520	Dipeptidyl peptidase-IV activity and/or structure homologs (DASH): contributing factors in the pathogenesis of rheumatic diseases?	Pubmed	0.0007785	1	0.002026	0.02011	1	1	DPP4
Pubmed	9330699	CD26 as a positive regulator of HIV envelope-glycoprotein induced apoptosis in CD4+ T cells.	Pubmed	0.0007785	1	0.002026	0.02011	1	1	DPP4
Pubmed	28440018	Clear cell sarcoma of kidney involving a horseshoe kidney and harboring EGFR internal tandem duplication.	Pubmed	0.0007785	1	0.002026	0.02011	1	1	EGFR
[truncated: 10,992 more rows]
