# Supplementary material for: Derivation of trophoblast stem cells from naïve human pluripotent stem cells
Source: eLife journal article supplement (doi:10.7554/elife.52504), 2020-02-12
Supplement: supp [file elife-52504-supp-v1.zip › elife_poa_e52504_Supplementary_file_5.xlsx]

## Sheet: Peak_with_DEG.cluster1_in_Less_
Chr	Start	End	Relation	Distance to TSS	Gene_Information	Gene_ID	DEG_cluster	Motif_location	Motif_matched_seq	Strand	Motif_score
chrX	150993727	150994090	nearest	13399	HMGB3,ENSG00000029993.14,protein_coding,chrX:150980509-150990775	HMGB3	1	-24	GGGAATGTGTTC	+	8.01694
chrX	150972813	150973106	nearest	-7550	HMGB3,ENSG00000029993.14,protein_coding,chrX:150980509-150990775	HMGB3	1	63	TGGAATGCCTGT	+	7.84264
chrX	145720983	145721387	nearest	-96647	SLITRK2,ENSG00000185985.8,protein_coding,chrX:145817832-145825842	SLITRK2	1	167	AGAGGCATTCCT	-	8.94774
chrX	145720983	145721387	nearest	-96647	SLITRK2,ENSG00000185985.8,protein_coding,chrX:145817832-145825842	SLITRK2	1	105	GGAGACATTCCA	-	8.80588
chrX	140815929	140816459	nearest	31323	CDR1,ENSG00000184258.6,protein_coding,chrX:140782405-140784871	CDR1	1	190	AGGAATGCCTGC	+	8.43463
chrX	140723493	140723738	nearest	-61256	CDR1,ENSG00000184258.6,protein_coding,chrX:140782405-140784871	CDR1	1	115	ACACACATTCCA	-	8.12482
chrX	140723493	140723738	nearest	-61256	CDR1,ENSG00000184258.6,protein_coding,chrX:140782405-140784871	CDR1	1	87	ACACACATTCCA	-	8.12482
chrX	140723493	140723738	nearest	-61256	CDR1,ENSG00000184258.6,protein_coding,chrX:140782405-140784871	CDR1	1	62	ACACACATTCCA	-	8.12482
chrX	140723493	140723738	nearest	-61256	CDR1,ENSG00000184258.6,protein_coding,chrX:140782405-140784871	CDR1	1	47	ACACACATTCCA	-	8.12482
chrX	140723493	140723738	nearest	-61256	CDR1,ENSG00000184258.6,protein_coding,chrX:140782405-140784871	CDR1	1	30	ACACACATTCCA	-	8.12482
chrX	140723493	140723738	nearest	-61256	CDR1,ENSG00000184258.6,protein_coding,chrX:140782405-140784871	CDR1	1	13	ACACACATTCCA	-	8.12482
chrX	140723493	140723738	nearest	-61256	CDR1,ENSG00000184258.6,protein_coding,chrX:140782405-140784871	CDR1	1	-6	ACACACATTCCA	-	8.12482
chrX	140723493	140723738	nearest	-61256	CDR1,ENSG00000184258.6,protein_coding,chrX:140782405-140784871	CDR1	1	-25	ACACACATTCCA	-	8.12482
chrX	140723493	140723738	nearest	-61256	CDR1,ENSG00000184258.6,protein_coding,chrX:140782405-140784871	CDR1	1	-44	ACACACATTCCA	-	8.12482
chrX	140723493	140723738	nearest	-61256	CDR1,ENSG00000184258.6,protein_coding,chrX:140782405-140784871	CDR1	1	-69	ACACACATTCCA	-	8.12482
chrX	140723493	140723738	nearest	-61256	CDR1,ENSG00000184258.6,protein_coding,chrX:140782405-140784871	CDR1	1	-88	ACAAACATTCCA	-	8.12057
chrX	140723493	140723738	nearest	-61256	CDR1,ENSG00000184258.6,protein_coding,chrX:140782405-140784871	CDR1	1	-105	ACACACATTCCA	-	8.12482
chrX	139936411	139936561	nearest	-8790	ATP11C,ENSG00000101974.14,protein_coding,chrX:139726346-139945276	ATP11C	1	47	AGGAATTCAGAG	+	8.16149
chrX	139903221	139903588	nearest	-41872	ATP11C,ENSG00000101974.14,protein_coding,chrX:139726346-139945276	ATP11C	1	-5	AGGAATGCTGAT	+	9.36387
chrX	139861817	139862531	nearest	-83102	ATP11C,ENSG00000101974.14,protein_coding,chrX:139726346-139945276	ATP11C	1	-179	AGGAATGCTACA	+	9.19671
chrX	136200579	136200769	nearest	53972	FHL1,ENSG00000022267.16,protein_coding,chrX:136146702-136211359	FHL1	1	40	GGGAATGTATCC	+	9.12679
chrX	136111758	136112022	nearest	-34812	FHL1,ENSG00000022267.16,protein_coding,chrX:136146702-136211359	FHL1	1	-110	AGGAATGTTCGT	+	8.20236
chrX	134198905	134199589	nearest	-37800	CCDC160,ENSG00000203952.9,protein_coding,chrX:134237047-134246207	CCDC160	1	-82	TGGAATGCAGTG	+	9.42789
chrX	133454505	133455138	nearest	39331	GPC4,ENSG00000076716.8,protein_coding,chrX:133300103-133415490	GPC4	1	-176	GGCTTCATTCCA	-	8.69968
chrX	133437407	133438119	nearest	22273	GPC4,ENSG00000076716.8,protein_coding,chrX:133300103-133415490	GPC4	1	-154	CCCTGCATTCCA	-	9.28767
chrX	119880637	119881285	nearest	9134	RNF113A,ENSG00000125352.5,protein_coding,chrX:119870475-119871827	RNF113A	1	-117	GTCGGAATTCCT	-	7.81253
chrX	119880637	119881285	nearest	9134	RNF113A,ENSG00000125352.5,protein_coding,chrX:119870475-119871827	RNF113A	1	-276	GAGGACATTCCA	-	7.92279
chrX	115649519	115650086	nearest	88628	PLS3,ENSG00000102024.17,protein_coding,chrX:115561174-115650861	PLS3	1	18	TAGAATGCTGCC	+	8.6195
chrX	115639472	115639954	nearest	78539	PLS3,ENSG00000102024.17,protein_coding,chrX:115561174-115650861	PLS3	1	-64	TCTAGCATTCCA	-	8.09161
chrX	107741668	107742552	nearest	-35232	TSC22D3,ENSG00000157514.16,protein_coding,chrX:107713221-107777342	TSC22D3	1	-331	AGGAATTCTGTC	+	8.34439
chrX	107654773	107655603	nearest	26764	PRPS1,ENSG00000147224.10,protein_coding,chrX:107628424-107651026	PRPS1	1	319	AGGAATGTGTGC	+	8.71681
chrX	107654773	107655603	nearest	26764	PRPS1,ENSG00000147224.10,protein_coding,chrX:107628424-107651026	PRPS1	1	388	AGGAATGCAGAA	+	9.80389
chrX	107628118	107628824	nearest	47	PRPS1,ENSG00000147224.10,protein_coding,chrX:107628424-107651026	PRPS1	1	35	GGGAATGTAAGA	+	7.89647
chrX	107596502	107596763	nearest	-31792	PRPS1,ENSG00000147224.10,protein_coding,chrX:107628424-107651026	PRPS1	1	11	AAGAATGCTTCC	+	8.11542
chrX	107578375	107578531	nearest	-49971	PRPS1,ENSG00000147224.10,protein_coding,chrX:107628424-107651026	PRPS1	1	-47	GAACACATTCCA	-	8.54964
chrX	107562550	107562784	nearest	40217	FRMPD3,ENSG00000147234.10,protein_coding,chrX:107522450-107605251	FRMPD3	1	11	AGGAATGCCTGA	+	8.13344
chrX	107562550	107562784	nearest	40217	FRMPD3,ENSG00000147234.10,protein_coding,chrX:107522450-107605251	FRMPD3	1	41	AGGAATGCTTAG	+	8.33233
chrX	107561477	107561809	nearest	39193	FRMPD3,ENSG00000147234.10,protein_coding,chrX:107522450-107605251	FRMPD3	1	62	CCATACATTCCT	-	8.66453
chrX	107470955	107471292	nearest	-51327	FRMPD3,ENSG00000147234.10,protein_coding,chrX:107522450-107605251	FRMPD3	1	-38	GGGAATGCAGGT	+	8.97503
chrX	107440124	107440276	nearest	-82250	FRMPD3,ENSG00000147234.10,protein_coding,chrX:107522450-107605251	FRMPD3	1	15	GGACACATTCCC	-	8.67442
chrX	100424092	100424334	nearest	13940	PCDH19,ENSG00000165194.14,protein_coding,chrX:100291644-100410273	PCDH19	1	-76	TTCAGCATTCTT	-	7.83337
chrX	100379469	100379694	nearest	-30692	PCDH19,ENSG00000165194.14,protein_coding,chrX:100291644-100410273	PCDH19	1	-89	AGGAATGTAAAG	+	8.53847
chrX	96648551	96648756	nearest	-36010	DIAPH2,ENSG00000147202.17,protein_coding,chrX:96684663-97604997	DIAPH2	1	7	ATCAACATTCCA	-	8.93741
chrX	80875198	80875363	nearest	65592	BRWD3,ENSG00000165288.10,protein_coding,chrX:80670854-80809688	BRWD3	1	-27	AGCAGCATTCCT	-	10.1562
chrX	80815576	80816344	nearest	6272	BRWD3,ENSG00000165288.10,protein_coding,chrX:80670854-80809688	BRWD3	1	-213	AGATGCATTCTA	-	7.98004
chrX	79926547	79927379	nearest	-87793	TBX22,ENSG00000122145.14,protein_coding,chrX:80014756-80031769	TBX22	1	-171	AAAAACATTCCA	-	8.2608
chrX	72733259	72734416	nearest	19518	PHKA1,ENSG00000067177.14,protein_coding,chrX:72578814-72714319	PHKA1	1	-198	AGGAATGCCTCT	+	8.94774
chrX	72733259	72734416	nearest	19518	PHKA1,ENSG00000067177.14,protein_coding,chrX:72578814-72714319	PHKA1	1	-135	TGGAATGTCTCA	+	8.50469
chrX	72733259	72734416	nearest	19518	PHKA1,ENSG00000067177.14,protein_coding,chrX:72578814-72714319	PHKA1	1	347	CCAAACATTCCT	-	8.20791
chrX	72730405	72730984	nearest	16375	PHKA1,ENSG00000067177.14,protein_coding,chrX:72578814-72714319	PHKA1	1	87	GATGACATTCCA	-	8.01698
chrX	70444687	70444949	nearest	-43	DLG3,ENSG00000082458.11,protein_coding,chrX:70444861-70505490	DLG3	1	-73	TTTAGCATTCCT	-	8.40437
chrX	64205265	64206449	nearest	113	AMER1,ENSG00000184675.9,protein_coding,chrX:64185117-64205744	AMER1	1	-343	GGGAATGCACCC	+	9.02024
chrX	54198433	54198588	nearest	15229	FAM120C,ENSG00000184083.11,protein_coding,chrX:54068324-54183281	FAM120C	1	14	TGAGGCATTCCA	-	8.62375
chrX	46551491	46551949	nearest	6263	ZNF674,ENSG00000251192.7,protein_coding,chrX:46497727-46545457	ZNF674	1	-26	AGGAATGCTTGA	+	8.53043
chrX	46545147	46545893	nearest	63	ZNF674,ENSG00000251192.7,protein_coding,chrX:46497727-46545457	ZNF674	1	83	AGGAATGTGTGA	+	8.41562
chrX	44891583	44892014	nearest	18621	KDM6A,ENSG00000147050.14,protein_coding,chrX:44873177-45112602	KDM6A	1	62	TGGAATGTTGAG	+	8.71735
chrX	38891699	38892375	nearest	90605	MID1IP1,ENSG00000165175.15,protein_coding,chrX:38801432-38806537	MID1IP1	1	81	AAGAATTTAGCC	+	7.82551
chrX	38228186	38228820	nearest	7579	SRPX,ENSG00000101955.14,protein_coding,chrX:38149336-38220924	SRPX	1	111	AGGAATGTGAGG	+	8.08073
chrX	23953025	23953613	nearest	45385	APOO,ENSG00000184831.13,protein_coding,chrX:23833353-23907934	APOO	1	173	TGGAATGCTTGC	+	8.52422
chrX	23318188	23318585	nearest	-15629	PTCHD1,ENSG00000165186.10,protein_coding,chrX:23334015-23404372	PTCHD1	1	33	ACACACATTCCT	-	8.43222
chrX	19106884	19107365	nearest	-15513	ADGRG2,ENSG00000173698.17,protein_coding,chrX:18989309-19122637	ADGRG2	1	215	TGGAATGTATTT	+	8.71742
chrX	16815157	16815453	nearest	28878	TXLNG,ENSG00000086712.12,protein_coding,chrX:16786427-16844519	TXLNG	1	11	AGGAATGCACCA	+	9.55914
chrX	16772379	16773259	nearest	-13608	TXLNG,ENSG00000086712.12,protein_coding,chrX:16786427-16844519	TXLNG	1	-318	AAGTACATTCCA	-	8.49181
chrX	15815913	15816743	nearest	25856	ZRSR2,ENSG00000169249.12,protein_coding,chrX:15790472-15823260	ZRSR2	1	341	TGGAATGCCTTT	+	7.98287
chrX	15815913	15816743	nearest	25856	ZRSR2,ENSG00000169249.12,protein_coding,chrX:15790472-15823260	ZRSR2	1	-71	CGGTGCATTCCC	-	8.51558
chrX	13658750	13658900	nearest	5636	TCEANC,ENSG00000176896.8,protein_coding,chrX:13653189-13681964	TCEANC	1	8	TGGAATGTAGAA	+	9.37743
chrX	13638920	13639193	nearest	-14133	TCEANC,ENSG00000176896.8,protein_coding,chrX:13653189-13681964	TCEANC	1	-133	TGGAATGAGGCA	+	7.94612
chrX	13638920	13639193	nearest	-14133	TCEANC,ENSG00000176896.8,protein_coding,chrX:13653189-13681964	TCEANC	1	-2	GGCTGCATTCTT	-	9.38351
chrX	3354418	3354613	nearest	7874	MXRA5,ENSG00000101825.7,protein_coding,chrX:3308565-3346641	MXRA5	1	50	CCAGGCATTCCT	-	7.92998
chr9	134698536	134698829	nearest	56908	COL5A1,ENSG00000130635.15,protein_coding,chr9:134641774-134844843	COL5A1	1	-130	GGCAGCATTCTC	-	8.0868
chr9	129558595	129559072	nearest	-50051	NTMT1,ENSG00000148335.14,protein_coding,chr9:129608884-129636131	NTMT1	1	8	AGGAATGCTCCA	+	9.10252
chr9	129557406	129557759	nearest	-51302	NTMT1,ENSG00000148335.14,protein_coding,chr9:129608884-129636131	NTMT1	1	-26	TGGAATGCAGCC	+	10.59
chr9	121463107	121463325	nearest	92912	STOM,ENSG00000148175.12,protein_coding,chr9:121338988-121370304	STOM	1	-65	AATAACATTCCA	-	8.12938
chr9	121326245	121326451	nearest	-43956	STOM,ENSG00000148175.12,protein_coding,chr9:121338988-121370304	STOM	1	46	GGTCACATTCCA	-	9.07569
chr9	121320914	121321191	nearest	-49252	STOM,ENSG00000148175.12,protein_coding,chr9:121338988-121370304	STOM	1	-59	TACTGCATTCCT	-	9.93876
chr9	114107812	114108683	nearest	9020	KIF12,ENSG00000136883.12,protein_coding,chr9:114086126-114099227	KIF12	1	-256	GACTGCATTCCT	-	10.2399
chr9	107523560	107523914	nearest	33255	KLF4,ENSG00000136826.14,protein_coding,chr9:107484852-107490482	KLF4	1	-113	GGGCACATTCCT	-	9.2889
chr9	107438167	107438906	nearest	-51946	KLF4,ENSG00000136826.14,protein_coding,chr9:107484852-107490482	KLF4	1	16	AGGAATGCTGTT	+	9.49874
chr9	107424984	107425623	nearest	-65179	KLF4,ENSG00000136826.14,protein_coding,chr9:107484852-107490482	KLF4	1	54	GTCTACATTCCT	-	9.98602
chr9	104993132	104993817	nearest	65237	ABCA1,ENSG00000165029.15,protein_coding,chr9:104781002-104928237	ABCA1	1	209	TGGAATGTCACT	+	8.38986
chr9	97593334	97593571	nearest	-40123	TSTD2,ENSG00000136925.14,protein_coding,chr9:97600080-97633575	TSTD2	1	-75	AAGAATGTAGGA	+	8.16556
chr9	94650425	94650868	nearest	10397	FBP1,ENSG00000165140.9,protein_coding,chr9:94603133-94640249	FBP1	1	-34	GATGACATTCCA	-	8.01698
chr9	94632828	94633049	nearest	-7311	FBP1,ENSG00000165140.9,protein_coding,chr9:94603133-94640249	FBP1	1	-26	CTGCACATTCCT	-	7.99191
chr9	94627394	94627594	nearest	-12755	FBP1,ENSG00000165140.9,protein_coding,chr9:94603133-94640249	FBP1	1	-83	GTCATCATTCCT	-	7.75812
chr9	90895315	90895615	nearest	93678	SYK,ENSG00000165025.14,protein_coding,chr9:90801787-90898549	SYK	1	38	AAGAATGCATCT	+	8.28744
chr9	84669670	84670098	nearest	1333	NTRK2,ENSG00000148053.15,protein_coding,chr9:84668551-85027070	NTRK2	1	198	CTCCGCATTCCC	-	8.30796
chr9	76472376	76472657	nearest	52666	GCNT1,ENSG00000187210.12,protein_coding,chr9:76419850-76507416	GCNT1	1	-116	GGGAATGCAGTA	+	9.09866
chr9	76470812	76471460	nearest	51286	GCNT1,ENSG00000187210.12,protein_coding,chr9:76419850-76507416	GCNT1	1	288	AGGAATGTGCTC	+	8.63143
chr9	71920932	71921843	nearest	9877	C9orf85,ENSG00000155621.14,protein_coding,chr9:71911510-71986054	C9orf85	1	370	ATAAACATTCCT	-	8.43333
chr9	34562237	34562566	nearest	-27739	CNTFR,ENSG00000122756.14,protein_coding,chr9:34551432-34590140	CNTFR	1	64	AGGTACATTCCC	-	8.61659
chr9	18473934	18474402	nearest	274	ADAMTSL1,ENSG00000178031.15,protein_coding,chr9:18473894-18910950	ADAMTSL1	1	65	TGGAATGCTGCC	+	10.1334
chr9	16828812	16829271	nearest	-41802	BNC2,ENSG00000173068.17,protein_coding,chr9:16409503-16870843	BNC2	1	-212	TGGAATGTGTCT	+	8.92252
chr9	16795463	16795642	nearest	-75291	BNC2,ENSG00000173068.17,protein_coding,chr9:16409503-16870843	BNC2	1	55	ACCAACATTCCC	-	8.39936
chr8	141446355	141446521	nearest	54445	PTP4A3,ENSG00000184489.11,protein_coding,chr8:141391993-141432454	PTP4A3	1	79	AAGAACATTCCA	-	8.03519
chr8	141134737	141135053	nearest	17617	DENND3,ENSG00000105339.10,protein_coding,chr8:141117278-141195808	DENND3	1	-127	TGGAATGTTGAG	+	8.71735
chr8	141075574	141075807	nearest	-41588	DENND3,ENSG00000105339.10,protein_coding,chr8:141117278-141195808	DENND3	1	-79	TGGAATTCAGCC	+	9.15108
chr8	126588521	126588930	nearest	30332	FAM84B,ENSG00000168672.3,protein_coding,chr8:126552442-126558393	FAM84B	1	-155	TAGAATGTTGCG	+	7.99578
chr8	126588521	126588930	nearest	30332	FAM84B,ENSG00000168672.3,protein_coding,chr8:126552442-126558393	FAM84B	1	-31	AGGAATGTTGGC	+	9.52404
chr8	126579831	126580508	nearest	21776	FAM84B,ENSG00000168672.3,protein_coding,chr8:126552442-126558393	FAM84B	1	-165	AGGAATGCTGGC	+	9.6431
chr8	126545030	126545437	nearest	-13160	FAM84B,ENSG00000168672.3,protein_coding,chr8:126552442-126558393	FAM84B	1	113	GGGAATGTGGGC	+	8.68819
chr8	119917368	119918312	nearest	44123	DEPTOR,ENSG00000155792.9,protein_coding,chr8:119873717-120050913	DEPTOR	1	-28	TGGAATGTCTCG	+	8.30122
chr8	119866803	119867419	nearest	-6606	DEPTOR,ENSG00000155792.9,protein_coding,chr8:119873717-120050913	DEPTOR	1	75	AGTAGCATTCCC	-	8.37322
chr8	119866803	119867419	nearest	-6606	DEPTOR,ENSG00000155792.9,protein_coding,chr8:119873717-120050913	DEPTOR	1	43	TCTAGCATTCCT	-	8.39901
chr8	119699186	119699660	nearest	25970	ENPP2,ENSG00000136960.12,protein_coding,chr8:119557086-119673453	ENPP2	1	27	AGGCGCATTCCC	-	8.28328
chr8	119596901	119597468	nearest	-76269	ENPP2,ENSG00000136960.12,protein_coding,chr8:119557086-119673453	ENPP2	1	176	CTCAACATTCCA	-	8.71735
chr8	115867041	115867592	nearest	57643	TRPS1,ENSG00000104447.11,protein_coding,chr8:115408496-115809673	TRPS1	1	-181	TAGGGCATTCCT	-	8.04806
chr8	115838313	115838741	nearest	28854	TRPS1,ENSG00000104447.11,protein_coding,chr8:115408496-115809673	TRPS1	1	123	TACGGCATTCCT	-	9.08515
chr8	115819920	115820070	nearest	10322	TRPS1,ENSG00000104447.11,protein_coding,chr8:115408496-115809673	TRPS1	1	-46	TGGAATGCAGAA	+	9.49649
chr8	115818845	115819384	nearest	9441	TRPS1,ENSG00000104447.11,protein_coding,chr8:115408496-115809673	TRPS1	1	24	GATGACATTCCA	-	8.01698
chr8	115709907	115710135	nearest	-99652	TRPS1,ENSG00000104447.11,protein_coding,chr8:115408496-115809673	TRPS1	1	106	TGTGACATTCCT	-	8.68066
chr8	115709907	115710135	nearest	-99652	TRPS1,ENSG00000104447.11,protein_coding,chr8:115408496-115809673	TRPS1	1	49	GATGACATTCCA	-	8.01698
chr8	97295510	97295924	nearest	17753	TSPYL5,ENSG00000180543.4,protein_coding,chr8:97273474-97277964	TSPYL5	1	-170	AGGAATGTTTCA	+	9.20908
chr8	97180279	97180594	nearest	-97528	TSPYL5,ENSG00000180543.4,protein_coding,chr8:97273474-97277964	TSPYL5	1	-143	AGGAATGTCTGG	+	7.81092
chr8	97180279	97180594	nearest	-97528	TSPYL5,ENSG00000180543.4,protein_coding,chr8:97273474-97277964	TSPYL5	1	-4	GATGACATTCCA	-	8.01698
chr8	90095378	90095834	nearest	131	CALB1,ENSG00000104327.7,protein_coding,chr8:90058608-90095475	CALB1	1	127	TGGAATGTCATC	+	8.01698
chr8	90090271	90090627	nearest	-5026	CALB1,ENSG00000104327.7,protein_coding,chr8:90058608-90095475	CALB1	1	73	TGGAATGTCATC	+	8.01698
chr8	76680975	76681293	nearest	-85	ZFHX4,ENSG00000091656.15,protein_coding,chr8:76681219-76867285	ZFHX4	1	8	GGGAATGTTGAT	+	8.40472
chr8	73033949	73034575	nearest	25398	TERF1,ENSG00000147601.13,protein_coding,chr8:73008864-73048122	TERF1	1	-270	TGGAATGCAGTG	+	9.42789
chr8	72926846	72926996	nearest	-81943	TERF1,ENSG00000147601.13,protein_coding,chr8:73008864-73048122	TERF1	1	17	GCCTGAATTCCT	-	8.66078
chr8	70079808	70080070	nearest	8246	PRDM14,ENSG00000147596.3,protein_coding,chr8:70051651-70071693	PRDM14	1	-28	TGGAATGTGGGG	+	8.71624
chr8	70074522	70075117	nearest	3126	PRDM14,ENSG00000147596.3,protein_coding,chr8:70051651-70071693	PRDM14	1	-214	TGGAATGCAGCA	+	10.2888
chr8	70014459	70016005	nearest	-56461	PRDM14,ENSG00000147596.3,protein_coding,chr8:70051651-70071693	PRDM14	1	685	TGCGTCATTCCT	-	7.85228
chr8	69992877	69993391	nearest	-78559	PRDM14,ENSG00000147596.3,protein_coding,chr8:70051651-70071693	PRDM14	1	-233	CCCGGCATTCCT	-	8.74146
chr8	56445406	56446128	nearest	-967	PENK,ENSG00000181195.10,protein_coding,chr8:56436674-56446734	PENK	1	301	AGGAATGCTCCT	+	9.11912
chr8	52788655	52788883	nearest	42926	RB1CC1,ENSG00000023287.12,protein_coding,chr8:52622456-52745843	RB1CC1	1	82	AGGAATTTAGCT	+	9.05483
chr8	52737876	52738424	nearest	-7693	RB1CC1,ENSG00000023287.12,protein_coding,chr8:52622456-52745843	RB1CC1	1	236	CAAAGCATTCCT	-	8.4672
chr8	52688306	52688793	nearest	-57294	RB1CC1,ENSG00000023287.12,protein_coding,chr8:52622456-52745843	RB1CC1	1	-189	AGGAATGCATTC	+	9.42847
chr8	52688306	52688793	nearest	-57294	RB1CC1,ENSG00000023287.12,protein_coding,chr8:52622456-52745843	RB1CC1	1	-176	GAATGCATTCCT	-	9.42847
chr8	40174721	40174982	nearest	21396	C8orf4,ENSG00000176907.4,protein_coding,chr8:40153455-40155308	C8orf4	1	80	TTCAGAATTCCT	-	7.90834
chr8	24906041	24906266	nearest	-6859	NEFM,ENSG00000104722.13,protein_coding,chr8:24913012-24919098	NEFM	1	30	AGGAATGCATGG	+	8.78359
chr8	13033737	13034278	nearest	88365	KIAA1456,ENSG00000250305.8,protein_coding,chr8:12945642-13031503	KIAA1456	1	-257	GGAAAAATTCCT	-	8.07133
chr7	158587583	158588540	nearest	273	PTPRN2,ENSG00000155093.17,protein_coding,chr7:157539056-158587788	PTPRN2	1	27	ACCTGCATTCCT	-	9.81513
chr7	139490198	139490410	nearest	6592	KLRG2,ENSG00000188883.4,protein_coding,chr7:139452690-139483712	KLRG2	1	50	GAAAACATTCCA	-	8.54539
chr7	139474870	139475030	nearest	-8762	KLRG2,ENSG00000188883.4,protein_coding,chr7:139452690-139483712	KLRG2	1	55	AGGAATGCTGCA	+	10.1396
chr7	139467494	139468225	nearest	-15853	KLRG2,ENSG00000188883.4,protein_coding,chr7:139452690-139483712	KLRG2	1	1	AGGAATGCCTCT	+	8.94774
chr7	139467494	139468225	nearest	-15853	KLRG2,ENSG00000188883.4,protein_coding,chr7:139452690-139483712	KLRG2	1	64	TGGAATGTCTCG	+	8.30122
chr7	139465583	139465991	nearest	-17925	KLRG2,ENSG00000188883.4,protein_coding,chr7:139452690-139483712	KLRG2	1	43	CCTAGCATTCCA	-	7.88815
chr7	139459405	139459555	nearest	-24232	KLRG2,ENSG00000188883.4,protein_coding,chr7:139452690-139483712	KLRG2	1	-10	ACCTACATTCCT	-	9.69607
chr7	139450927	139451077	nearest	-32710	KLRG2,ENSG00000188883.4,protein_coding,chr7:139452690-139483712	KLRG2	1	-65	GGGAATGCTCCT	+	8.27903
chr7	130490327	130490482	nearest	4233	MEST,ENSG00000106484.14,protein_coding,chr7:130486171-130506296	MEST	1	-13	TGGAATGTTCTT	+	8.03519
chr7	129188323	129188861	nearest	-280	SMO,ENSG00000128602.9,protein_coding,chr7:129188872-129213545	SMO	1	45	CCGTGCATTCCA	-	8.25058
chr7	128890746	128891666	nearest	-19513	KCP,ENSG00000135253.13,protein_coding,chr7:128862451-128910719	KCP	1	-421	CACTACATTCCT	-	9.61623
chr7	123865613	123865858	nearest	36752	HYAL4,ENSG00000106302.9,protein_coding,chr7:123828983-123877478	HYAL4	1	84	GAAAACATTCCT	-	8.85279
chr7	123797965	123798638	nearest	-30682	HYAL4,ENSG00000106302.9,protein_coding,chr7:123828983-123877478	HYAL4	1	-154	AGGAATTTTGTA	+	7.92414
chr7	122171616	122172575	nearest	27815	AASS,ENSG00000008311.14,protein_coding,chr7:122075647-122144280	AASS	1	265	GGGAATGCATCT	+	8.96126
chr7	122125426	122125775	nearest	-18680	AASS,ENSG00000008311.14,protein_coding,chr7:122075647-122144280	AASS	1	48	TGGAATGCTGAG	+	8.83641
chr7	122067082	122067273	nearest	-77103	AASS,ENSG00000008311.14,protein_coding,chr7:122075647-122144280	AASS	1	29	TGGAATGTTTGC	+	8.40517
chr7	113159831	113160074	nearest	72174	GPR85,ENSG00000164604.12,protein_coding,chr7:113078331-113087778	GPR85	1	77	AGGAATGTTGTC	+	9.66427
chr7	108468256	108468415	nearest	11618	NRCAM,ENSG00000091129.19,protein_coding,chr7:108147623-108456717	NRCAM	1	-47	CACAACATTCCA	-	8.85222
chr7	108358381	108359073	nearest	-97990	NRCAM,ENSG00000091129.19,protein_coding,chr7:108147623-108456717	NRCAM	1	77	AGGAATTCTGCC	+	9.00186
chr7	105837782	105838195	nearest	-38616	ATXN7L1,ENSG00000146776.14,protein_coding,chr7:105605067-105876604	ATXN7L1	1	50	AGGAATGCTTCC	+	9.62932
chr7	103150345	103150582	nearest	903	NAPEPLD,ENSG00000161048.11,protein_coding,chr7:103099776-103149560	NAPEPLD	1	-87	AGGAATGTAAAG	+	8.53847
chr7	103148928	103149901	nearest	-146	NAPEPLD,ENSG00000161048.11,protein_coding,chr7:103099776-103149560	NAPEPLD	1	354	GAACGCATTCCT	-	8.9761
chr7	94440745	94441041	nearest	46332	COL1A2,ENSG00000164692.17,protein_coding,chr7:94394561-94431232	COL1A2	1	69	ATGCACATTCCT	-	8.21197
chr7	93476701	93477018	nearest	-97871	CALCR,ENSG00000004948.13,protein_coding,chr7:93424487-93574730	CALCR	1	-34	AGGAATGTAGCT	+	10.4938
chr7	83693065	83693894	nearest	44469	SEMA3E,ENSG00000170381.12,protein_coding,chr7:83363906-83649010	SEMA3E	1	52	CTTTGCATTCCC	-	7.81743
chr7	83693065	83693894	nearest	44469	SEMA3E,ENSG00000170381.12,protein_coding,chr7:83363906-83649010	SEMA3E	1	9	GCCTGAATTCCA	-	8.35338
chr7	83684847	83685340	nearest	36083	SEMA3E,ENSG00000170381.12,protein_coding,chr7:83363906-83649010	SEMA3E	1	62	TGGAATGTGGAT	+	8.94166
chr7	83648448	83649291	nearest	-141	SEMA3E,ENSG00000170381.12,protein_coding,chr7:83363906-83649010	SEMA3E	1	-100	GAGGACATTCCA	-	7.92279
chr7	80883268	80883825	nearest	-38813	SEMA3C,ENSG00000075223.13,protein_coding,chr7:80742538-80922359	SEMA3C	1	-250	TGGAATTTAGAT	+	7.95509
chr7	80873801	80874339	nearest	-48289	SEMA3C,ENSG00000075223.13,protein_coding,chr7:80742538-80922359	SEMA3C	1	202	TACAGCATTCCA	-	9.17474
chr7	64902715	64903721	nearest	33046	ZNF273,ENSG00000198039.11,protein_coding,chr7:64870172-64930966	ZNF273	1	-413	GGTTGCATTCTT	-	8.44061
chr7	48038907	48039453	nearest	3669	C7orf57,ENSG00000164746.13,protein_coding,chr7:48035511-48061304	C7orf57	1	201	GCCTGAATTCCA	-	8.35338
chr7	47989728	47990463	nearest	10514	HUS1,ENSG00000136273.11,protein_coding,chr7:47695730-47979581	HUS1	1	91	TGGAATGTCTCG	+	8.30122
chr7	45217495	45217889	nearest	59901	RAMP3,ENSG00000122679.8,protein_coding,chr7:45157791-45186302	RAMP3	1	40	AGGAATTTTGTC	+	8.22533
chr7	45203920	45204579	nearest	46458	RAMP3,ENSG00000122679.8,protein_coding,chr7:45157791-45186302	RAMP3	1	-135	AACTGAATTCCA	-	8.20902
chr7	32390329	32390555	nearest	91113	PDE1C,ENSG00000154678.16,protein_coding,chr7:31751179-32299329	PDE1C	1	-17	AGGAATGCTACT	+	9.21331
chr7	32267031	32267395	nearest	-32116	PDE1C,ENSG00000154678.16,protein_coding,chr7:31751179-32299329	PDE1C	1	-2	AGGAATGCAAAG	+	8.65753
chr7	29854471	29855144	nearest	48321	WIPF3,ENSG00000122574.10,protein_coding,chr7:29806486-29917066	WIPF3	1	-50	GGCCAAATTCCA	-	8.57965
chr7	29847307	29848208	nearest	41271	WIPF3,ENSG00000122574.10,protein_coding,chr7:29806486-29917066	WIPF3	1	-92	AGCTGCATTCCT	-	10.6128
chr7	29793583	29793887	nearest	-12751	WIPF3,ENSG00000122574.10,protein_coding,chr7:29806486-29917066	WIPF3	1	50	TCCTACATTCCA	-	9.37207
chr7	29792215	29792452	nearest	-14153	WIPF3,ENSG00000122574.10,protein_coding,chr7:29806486-29917066	WIPF3	1	-81	GATGACATTCCA	-	8.01698
chr7	29784706	29785239	nearest	-21514	WIPF3,ENSG00000122574.10,protein_coding,chr7:29806486-29917066	WIPF3	1	144	GATGACATTCCA	-	8.01698
chr7	29589117	29589482	nearest	25488	PRR15,ENSG00000176532.3,protein_coding,chr7:29563811-29567295	PRR15	1	-135	TGGAATGCTTCT	+	9.03733
chr7	29589117	29589482	nearest	25488	PRR15,ENSG00000176532.3,protein_coding,chr7:29563811-29567295	PRR15	1	75	AGGAATGCTCCT	+	9.11912
chr7	29538242	29538828	nearest	-25276	PRR15,ENSG00000176532.3,protein_coding,chr7:29563811-29567295	PRR15	1	-120	GAGAATGCAGCA	+	8.24223
chr7	27742043	27742390	nearest	2885	TAX1BP1,ENSG00000106052.13,protein_coding,chr7:27739331-27844564	TAX1BP1	1	-113	TGAGACATTCCA	-	8.50469
chr7	24604647	24605042	nearest	31576	MPP6,ENSG00000105926.15,protein_coding,chr7:24573268-24694193	MPP6	1	-117	AAGGGCATTCCT	-	8.06466
chr7	24587907	24588206	nearest	14788	MPP6,ENSG00000105926.15,protein_coding,chr7:24573268-24694193	MPP6	1	93	TGGAATGTAGAG	+	9.17397
chr7	22842349	22843070	nearest	19857	TOMM7,ENSG00000196683.10,protein_coding,chr7:22812628-22822852	TOMM7	1	-68	AGGAATGTCACG	+	8.4772
chr7	21945449	21946571	nearest	-74	CDCA7L,ENSG00000164649.19,protein_coding,chr7:21900900-21946084	CDCA7L	1	527	AGGAATGCTGAC	+	9.64846
chr7	21388777	21389508	nearest	-38892	SP4,ENSG00000105866.13,protein_coding,chr7:21428034-21514822	SP4	1	54	AGGAATGTCTGG	+	7.81092
chr7	5652812	5653945	nearest	60555	FSCN1,ENSG00000075618.17,protein_coding,chr7:5592823-5606655	FSCN1	1	-38	AGGAATTTGGGA	+	7.78816
chr7	5639157	5639352	nearest	46431	FSCN1,ENSG00000075618.17,protein_coding,chr7:5592823-5606655	FSCN1	1	-32	TGGAATGTGGAT	+	8.94166
chr7	5639157	5639352	nearest	46431	FSCN1,ENSG00000075618.17,protein_coding,chr7:5592823-5606655	FSCN1	1	-84	CCTAACATTCCT	-	8.07649
chr7	2389665	2390285	nearest	-13585	CHST12,ENSG00000136213.9,protein_coding,chr7:2403560-2448483	CHST12	1	-59	AGAGGCATTCCT	-	8.94774
chr7	2389665	2390285	nearest	-13585	CHST12,ENSG00000136213.9,protein_coding,chr7:2403560-2448483	CHST12	1	-121	GGAGACATTCCA	-	8.80588
chr6	167288735	167289701	nearest	18049	UNC93A,ENSG00000112494.9,protein_coding,chr6:167271169-167316019	UNC93A	1	-22	AGGAATGTGTAG	+	8.21752
chr6	167218036	167218284	nearest	-53009	UNC93A,ENSG00000112494.9,protein_coding,chr6:167271169-167316019	UNC93A	1	22	CTACACATTCCT	-	8.21752
chr6	162713996	162714486	nearest	-12891	PACRG,ENSG00000112530.11,protein_coding,chr6:162727132-163315492	PACRG	1	-211	AGGAATGTGACG	+	8.87843
chr6	151455600	151456061	nearest	3572	ARMT1,ENSG00000146476.10,protein_coding,chr6:151452258-151470101	ARMT1	1	-171	CGAGACATTCCA	-	8.30122
chr6	151228934	151230530	nearest	-10267	AKAP12,ENSG00000131016.16,protein_coding,chr6:151239999-151358557	AKAP12	1	-551	GGCTGCATTCCC	-	10.0573
chr6	151160956	151161300	nearest	-78871	AKAP12,ENSG00000131016.16,protein_coding,chr6:151239999-151358557	AKAP12	1	165	CCCTGAATTCCA	-	7.84873
chr6	142944631	142945519	nearest	-126	HIVEP2,ENSG00000010818.8,protein_coding,chr6:142751467-142945201	HIVEP2	1	116	AGGCACATTCCT	-	9.00431
chr6	142944631	142945519	nearest	-126	HIVEP2,ENSG00000010818.8,protein_coding,chr6:142751467-142945201	HIVEP2	1	-420	TGGAACATTCCC	-	8.14337
chr6	138723881	138724502	nearest	31620	NHSL1,ENSG00000135540.11,protein_coding,chr6:138422043-138692571	NHSL1	1	-184	GGAAGCATTCTT	-	8.11542
chr6	128569794	128570016	nearest	49231	PTPRK,ENSG00000152894.14,protein_coding,chr6:127968779-128520674	PTPRK	1	7	AAGAGCATTCCA	-	8.15425
chr6	128520214	128521025	nearest	-55	PTPRK,ENSG00000152894.14,protein_coding,chr6:127968779-128520674	PTPRK	1	56	AGGAATGCGGGC	+	9.64735
chr6	127302846	127303000	nearest	36313	RNF146,ENSG00000118518.15,protein_coding,chr6:127266610-127288567	RNF146	1	-12	AGCAGCATTCTA	-	8.33491
chr6	125728610	125729101	nearest	-18809	HEY2,ENSG00000135547.8,protein_coding,chr6:125747664-125761269	HEY2	1	-13	AGGAATGCACAA	+	8.7668
chr6	125702157	125702318	nearest	-45427	HEY2,ENSG00000135547.8,protein_coding,chr6:125747664-125761269	HEY2	1	-74	TGGAATGTCATC	+	8.01698
chr6	122829319	122830049	nearest	40635	SMPDL3A,ENSG00000172594.12,protein_coding,chr6:122789049-122809720	SMPDL3A	1	-233	AACCGCATTCTT	-	7.98908
chr6	122821123	122821695	nearest	32360	SMPDL3A,ENSG00000172594.12,protein_coding,chr6:122789049-122809720	SMPDL3A	1	151	CCCTGCATTCTT	-	8.08116
chr6	122789078	122790618	nearest	799	SMPDL3A,ENSG00000172594.12,protein_coding,chr6:122789049-122809720	SMPDL3A	1	-724	AAGTACATTCCT	-	8.79921
chr6	121491447	121492062	nearest	56062	GJA1,ENSG00000152661.7,protein_coding,chr6:121435692-121449727	GJA1	1	14	TCAAGCATTCCA	-	8.22304
chr6	121405776	121406146	nearest	-29731	GJA1,ENSG00000152661.7,protein_coding,chr6:121435692-121449727	GJA1	1	49	AAGAATGCAACC	+	8.44061
chr6	114427979	114428308	nearest	85098	HS3ST5,ENSG00000249853.7,protein_coding,chr6:114055586-114343045	HS3ST5	1	19	TGGAATGTCATC	+	8.01698
chr6	114421205	114421515	nearest	78315	HS3ST5,ENSG00000249853.7,protein_coding,chr6:114055586-114343045	HS3ST5	1	-42	AGGAATTTAGCT	+	9.05483
chr6	114334377	114334536	nearest	-8589	HS3ST5,ENSG00000249853.7,protein_coding,chr6:114055586-114343045	HS3ST5	1	-36	GAGGACATTCCA	-	7.92279
chr6	82253062	82253293	nearest	5423	IBTK,ENSG00000005700.14,protein_coding,chr6:82169983-82247754	IBTK	1	25	AGGAATGCTGAT	+	9.36387
chr6	82246950	82248350	nearest	-104	IBTK,ENSG00000005700.14,protein_coding,chr6:82169983-82247754	IBTK	1	-381	AGGAATGCAATG	+	8.79239
chr6	82213699	82214137	nearest	-33836	IBTK,ENSG00000005700.14,protein_coding,chr6:82169983-82247754	IBTK	1	84	TGGAATGCAGTG	+	9.42789
chr6	78810132	78810479	nearest	-57167	IRAK1BP1,ENSG00000146243.13,protein_coding,chr6:78867472-78946440	IRAK1BP1	1	-16	AGGAATGAGGAC	+	7.76237
chr6	75532523	75532914	nearest	38980	FILIP1,ENSG00000118407.14,protein_coding,chr6:75291859-75493738	FILIP1	1	2	TGGAATTCAGAG	+	7.85409
chr6	75205662	75206320	nearest	-60	COL12A1,ENSG00000111799.20,protein_coding,chr6:75084326-75206051	COL12A1	1	229	TCGAGCATTCCT	-	8.30482
chr6	72522764	72523065	nearest	-98878	KCNQ5,ENSG00000185760.15,protein_coding,chr6:72621792-73198851	KCNQ5	1	-34	GGGAATGCAAAT	+	8.03749
chr6	43425628	43425872	nearest	-1616	ABCC10,ENSG00000124574.14,protein_coding,chr6:43427366-43450430	ABCC10	1	-85	TGGAATGCTGTT	+	9.19134
chr6	43369138	43370820	nearest	501	ZNF318,ENSG00000171467.15,protein_coding,chr6:43307134-43369478	ZNF318	1	343	GATGACATTCCA	-	8.01698
chr6	43358260	43358547	nearest	-11075	ZNF318,ENSG00000171467.15,protein_coding,chr6:43307134-43369478	ZNF318	1	-109	TGGAATGCAGTG	+	9.42789
chr6	36143490	36143767	nearest	15819	MAPK13,ENSG00000156711.16,protein_coding,chr6:36127809-36144524	MAPK13	1	63	ATCTGCATTCCC	-	8.98039
chr6	34149527	34150243	nearest	-5737	GRM4,ENSG00000124493.13,protein_coding,chr6:34018645-34155622	GRM4	1	184	TTCTAAATTCCA	-	7.93849
chr6	31497689	31498467	nearest	3197	MICB,ENSG00000204516.9,protein_coding,chr6:31494881-31511124	MICB	1	-260	GGGAATGCGGGG	+	8.3026
chr6	31142087	31142692	nearest	3039	PSORS1C2,ENSG00000204538.3,protein_coding,chr6:31137536-31139350	PSORS1C2	1	-210	TCTGACATTCCT	-	7.88296
chr6	29679911	29680799	nearest	-755	ZFP57,ENSG00000204644.9,protein_coding,chr6:29672392-29681110	ZFP57	1	-88	GGGAATGTGTCG	+	8.16976
chr6	27792131	27793124	nearest	-15304	HIST1H2BL,ENSG00000185130.5,protein_coding,chr6:27807444-27807931	HIST1H2BL	1	-298	AGGAATGCAGCT	+	10.6128
chr6	27774853	27775003	nearest	-33003	HIST1H2BL,ENSG00000185130.5,protein_coding,chr6:27807444-27807931	HIST1H2BL	1	-19	CGAGACATTCCA	-	8.30122
chr6	24658894	24659531	nearest	-7821	TDP2,ENSG00000111802.13,protein_coding,chr6:24649977-24667033	TDP2	1	-133	CGCTGAATTCCA	-	8.64643
chr6	20237793	20238019	nearest	25507	MBOAT1,ENSG00000172197.10,protein_coding,chr6:20102145-20212399	MBOAT1	1	106	AGCCAAATTCCA	-	8.29506
chr6	20237793	20238019	nearest	25507	MBOAT1,ENSG00000172197.10,protein_coding,chr6:20102145-20212399	MBOAT1	1	-97	TTCTAAATTCCT	-	8.24589
chr6	20212056	20212976	nearest	117	MBOAT1,ENSG00000172197.10,protein_coding,chr6:20102145-20212399	MBOAT1	1	-143	GGGAATGCGAAC	+	7.86972
chr6	20197384	20197633	nearest	-14891	MBOAT1,ENSG00000172197.10,protein_coding,chr6:20102145-20212399	MBOAT1	1	79	AAGAATGCAACA	+	8.13942
chr6	16704621	16704878	nearest	-56742	ATXN1,ENSG00000124788.17,protein_coding,chr6:16299112-16761491	ATXN1	1	-28	TGGAATGCAAGT	+	8.56483
chr6	10585506	10585849	nearest	93454	GCNT2,ENSG00000111846.15,protein_coding,chr6:10492223-10629368	GCNT2	1	-26	CATTGCATTCCA	-	8.48499
chr6	10577175	10577458	nearest	85093	GCNT2,ENSG00000111846.15,protein_coding,chr6:10492223-10629368	GCNT2	1	31	GACTACATTCCC	-	9.28079
chr6	10575354	10576030	nearest	83469	GCNT2,ENSG00000111846.15,protein_coding,chr6:10492223-10629368	GCNT2	1	49	GATGACATTCCA	-	8.01698
chr6	10575354	10576030	nearest	83469	GCNT2,ENSG00000111846.15,protein_coding,chr6:10492223-10629368	GCNT2	1	-2	GATGACATTCCA	-	8.01698
chr6	10521080	10521555	nearest	29094	GCNT2,ENSG00000111846.15,protein_coding,chr6:10492223-10629368	GCNT2	1	-16	TTTCACATTCCA	-	7.98216
chr6	10521080	10521555	nearest	29094	GCNT2,ENSG00000111846.15,protein_coding,chr6:10492223-10629368	GCNT2	1	-223	TATAACATTCCT	-	8.42018
chr6	6033321	6033840	nearest	25975	NRN1,ENSG00000124785.8,protein_coding,chr6:5997999-6007605	NRN1	1	-99	TGGAATGTCATC	+	8.01698
chr6	6033321	6033840	nearest	25975	NRN1,ENSG00000124785.8,protein_coding,chr6:5997999-6007605	NRN1	1	104	TGCAGCATTCCT	-	10.1396
chr6	5957006	5957242	nearest	-50481	NRN1,ENSG00000124785.8,protein_coding,chr6:5997999-6007605	NRN1	1	85	TGGAATTCTGGC	+	7.89676
chr6	3022945	3023481	nearest	35226	NQO2,ENSG00000124588.19,protein_coding,chr6:2987987-3028869	NQO2	1	-20	TCCTGCATTCCT	-	9.79853
chr6	2988498	2990151	nearest	1337	NQO2,ENSG00000124588.19,protein_coding,chr6:2987987-3028869	NQO2	1	715	AGGAATTTAGCT	+	9.05483
chr5	177116881	177117240	nearest	-15965	NSD1,ENSG00000165671.18,protein_coding,chr5:177133025-177300215	NSD1	1	-21	AGGAATGCGGCC	+	10.445
chr5	171361347	171361497	nearest	-25694	NPM1,ENSG00000181163.13,protein_coding,chr5:171387116-171411137	NPM1	1	-52	GGCTGCATTCCC	-	10.0573
chr5	170761271	170761908	nearest	-1761	GABRP,ENSG00000094755.16,protein_coding,chr5:170763350-170814047	GABRP	1	-101	GCATGAATTCCT	-	7.8493
chr5	170693584	170694029	nearest	-69544	GABRP,ENSG00000094755.16,protein_coding,chr5:170763350-170814047	GABRP	1	129	AGGAATGTGGTG	+	9.16386
chr5	169980397	169981056	nearest	-14	FAM196B,ENSG00000204767.3,protein_coding,chr5:169864264-169980740	FAM196B	1	-206	GGCTGAATTCTT	-	7.94457
chr5	169218962	169219303	nearest	-81997	SLIT3,ENSG00000184347.14,protein_coding,chr5:168661733-169301129	SLIT3	1	-8	GGACACATTCCC	-	8.67442
chr5	160245149	160245370	nearest	57892	FABP6,ENSG00000170231.15,protein_coding,chr5:160187367-160238735	FABP6	1	72	CGCTGCATTCCA	-	10.0854
chr5	160188127	160188594	nearest	993	FABP6,ENSG00000170231.15,protein_coding,chr5:160187367-160238735	FABP6	1	-143	AGGAATGCCCTC	+	8.34925
chr5	154884467	154884787	nearest	25375	FAXDC2,ENSG00000170271.10,protein_coding,chr5:154818491-154859252	FAXDC2	1	74	TTTGGCATTCCT	-	8.00738
chr5	153456450	153456692	nearest	-33044	GRIA1,ENSG00000155511.17,protein_coding,chr5:153489615-153813869	GRIA1	1	23	CGTTGCATTCCT	-	9.44987
chr5	151696492	151697056	nearest	9609	SPARC,ENSG00000113140.10,protein_coding,chr5:151661096-151687165	SPARC	1	-64	TTACACATTCCT	-	8.42098
chr5	151686747	151687304	nearest	-140	SPARC,ENSG00000113140.10,protein_coding,chr5:151661096-151687165	SPARC	1	-100	GGGAATGTGGAG	+	8.1889
chr5	151684678	151685393	nearest	-2130	SPARC,ENSG00000113140.10,protein_coding,chr5:151661096-151687165	SPARC	1	-343	GGGAATGCCACA	+	7.95963
chr5	151684678	151685393	nearest	-2130	SPARC,ENSG00000113140.10,protein_coding,chr5:151661096-151687165	SPARC	1	48	ACTCGCATTCCT	-	8.41986
chr5	151673455	151674061	nearest	-13407	SPARC,ENSG00000113140.10,protein_coding,chr5:151661096-151687165	SPARC	1	-107	AGGAATGCAACC	+	9.95452
chr5	150801082	150801880	nearest	23535	SMIM3,ENSG00000256235.1,protein_coding,chr5:150777946-150796734	SMIM3	1	-170	TACAACATTCCT	-	9.36308
chr5	150778326	150779422	nearest	928	SMIM3,ENSG00000256235.1,protein_coding,chr5:150777946-150796734	SMIM3	1	-111	CCGCGCATTCCA	-	7.79821
chr5	150644065	150644354	nearest	-16665	MYOZ3,ENSG00000164591.13,protein_coding,chr5:150660874-150679365	MYOZ3	1	17	AGGAATGTTAAT	+	8.30191
chr5	150637467	150637900	nearest	-23191	MYOZ3,ENSG00000164591.13,protein_coding,chr5:150660874-150679365	MYOZ3	1	69	AGGAATGTGGGG	+	9.02363
chr5	147874193	147875376	nearest	4102	SCGB3A2,ENSG00000164265.8,protein_coding,chr5:147870682-147882191	SCGB3A2	1	-393	TGGAATGTCATC	+	8.01698
chr5	147868559	147869485	nearest	-1660	SCGB3A2,ENSG00000164265.8,protein_coding,chr5:147870682-147882191	SCGB3A2	1	-301	GATGACATTCCA	-	8.01698
chr5	147857627	147857838	nearest	-12950	SCGB3A2,ENSG00000164265.8,protein_coding,chr5:147870682-147882191	SCGB3A2	1	55	CATCGCATTCCA	-	8.03262
chr5	142046174	142046534	nearest	33313	GNPDA1,ENSG00000113552.15,protein_coding,chr5:141991749-142013041	GNPDA1	1	102	TGGAATGCTGAA	+	9.03988
chr5	133675924	133676074	nearest	63435	FSTL4,ENSG00000053108.16,protein_coding,chr5:133196455-133612564	FSTL4	1	-48	GGGAATGCTCCA	+	8.26243
chr5	133546495	133546878	nearest	-65878	FSTL4,ENSG00000053108.16,protein_coding,chr5:133196455-133612564	FSTL4	1	103	CCCCACATTCCA	-	8.71624
chr5	124723080	124723427	nearest	-25554	ZNF608,ENSG00000168916.15,protein_coding,chr5:124636913-124748807	ZNF608	1	-18	TTTTGCATTCCT	-	8.86099
chr5	124663061	124663437	nearest	-85558	ZNF608,ENSG00000168916.15,protein_coding,chr5:124636913-124748807	ZNF608	1	-80	TACAGCATTCCA	-	9.17474
chr5	124661283	124661770	nearest	-87281	ZNF608,ENSG00000168916.15,protein_coding,chr5:124636913-124748807	ZNF608	1	-66	TTCCACATTCCA	-	8.92506
chr5	102294966	102296726	nearest	-703	SLCO4C1,ENSG00000173930.8,protein_coding,chr5:102233986-102296549	SLCO4C1	1	-852	ATCTACATTCCA	-	9.39403
chr5	93611954	93612358	nearest	28819	NR2F1,ENSG00000175745.11,protein_coding,chr5:93583337-93594615	NR2F1	1	30	TGGAATGCAGAT	+	9.51309
chr5	81851038	81852130	nearest	99787	SSBP2,ENSG00000145687.15,protein_coding,chr5:81413021-81751797	SSBP2	1	-331	AGGAATGCAACT	+	9.66993
chr5	80244913	80245215	nearest	-11015	SERINC5,ENSG00000164300.15,protein_coding,chr5:80111651-80256079	SERINC5	1	49	GGGAATGTGTGC	+	7.87672
chr5	80191948	80193070	nearest	-63570	SERINC5,ENSG00000164300.15,protein_coding,chr5:80111651-80256079	SERINC5	1	344	GAGAGCATTCCT	-	8.74624
chr5	80184386	80184569	nearest	-71602	SERINC5,ENSG00000164300.15,protein_coding,chr5:80111651-80256079	SERINC5	1	0	TGGAATGCGGCC	+	10.1376
chr5	80183229	80183876	nearest	-72527	SERINC5,ENSG00000164300.15,protein_coding,chr5:80111651-80256079	SERINC5	1	49	GATGACATTCCA	-	8.01698
chr5	76498077	76498515	nearest	95047	IQGAP2,ENSG00000145703.15,protein_coding,chr5:76403249-76708132	IQGAP2	1	47	GGGAATGTGGCA	+	9.18471
chr5	76426332	76426752	nearest	23293	IQGAP2,ENSG00000145703.15,protein_coding,chr5:76403249-76708132	IQGAP2	1	-65	CACAGCATTCCA	-	8.97128
chr5	76396424	76396802	nearest	-6636	IQGAP2,ENSG00000145703.15,protein_coding,chr5:76403249-76708132	IQGAP2	1	94	AGGAATTCAGAG	+	8.16149
chr5	76305853	76306120	nearest	-97263	IQGAP2,ENSG00000145703.15,protein_coding,chr5:76403249-76708132	IQGAP2	1	108	TGGAATGCAGTG	+	9.42789
chr5	76083851	76084886	nearest	1196	SV2C,ENSG00000122012.13,protein_coding,chr5:76083172-76353939	SV2C	1	-278	ACATACATTCCC	-	8.04449
chr5	72203482	72203843	nearest	96428	MAP1B,ENSG00000131711.14,protein_coding,chr5:72107234-72209570	MAP1B	1	-21	TGCTACATTCCT	-	10.4772
chr5	72067769	72068012	nearest	-39344	MAP1B,ENSG00000131711.14,protein_coding,chr5:72107234-72209570	MAP1B	1	105	AGGAATGCATAA	+	8.99241
chr5	69501925	69502223	nearest	9782	OCLN,ENSG00000197822.10,protein_coding,chr5:69492292-69558104	OCLN	1	94	CATTGCATTCCA	-	8.48499
chr5	64705737	64706691	nearest	15906	FAM159B,ENSG00000145642.11,protein_coding,chr5:64690308-64718090	FAM159B	1	43	GGTTGCATTCTT	-	8.44061
chr5	38265616	38266061	nearest	7429	EGFLAM,ENSG00000164318.17,protein_coding,chr5:38258409-38465021	EGFLAM	1	-83	GCGCACATTCCA	-	8.1838
chr5	36073670	36074172	nearest	2563	UGT3A2,ENSG00000168671.9,protein_coding,chr5:36035017-36071358	UGT3A2	1	170	TGGAATGTGTCT	+	8.92252
chr5	36041263	36041488	nearest	-29983	UGT3A2,ENSG00000168671.9,protein_coding,chr5:36035017-36071358	UGT3A2	1	-95	GACAGAATTCCT	-	8.34439
chr5	31270533	31270873	nearest	76953	CDH6,ENSG00000113361.12,protein_coding,chr5:31193750-31329146	CDH6	1	-129	AGGAATGCAGCA	+	10.5962
chr5	31161542	31162353	nearest	-31803	CDH6,ENSG00000113361.12,protein_coding,chr5:31193750-31329146	CDH6	1	7	GAATACATTCCC	-	8.46932
chr4	188109321	188109702	nearest	-92	TRIML2,ENSG00000179046.8,protein_coding,chr4:188091273-188109603	TRIML2	1	-188	TGGAATGCAGTG	+	9.42789
chr4	188107893	188108670	nearest	-1322	TRIML2,ENSG00000179046.8,protein_coding,chr4:188091273-188109603	TRIML2	1	-180	GCTGACATTCCT	-	8.18415
chr4	188021912	188022168	nearest	26269	ZFP42,ENSG00000179059.9,protein_coding,chr4:187995771-188005050	ZFP42	1	30	TGGAATGCGGGT	+	9.05536
chr4	188016872	188017041	nearest	21185	ZFP42,ENSG00000179059.9,protein_coding,chr4:187995771-188005050	ZFP42	1	69	GGGAATGCAGGA	+	8.95843
chr4	188015105	188015286	nearest	19424	ZFP42,ENSG00000179059.9,protein_coding,chr4:187995771-188005050	ZFP42	1	60	GGGAATGCAGTA	+	9.09866
chr4	187995482	187996069	nearest	4	ZFP42,ENSG00000179059.9,protein_coding,chr4:187995771-188005050	ZFP42	1	127	TGGAATGTGTCG	+	8.70246
chr4	186765741	186766336	nearest	39316	FAT1,ENSG00000083857.13,protein_coding,chr4:186587783-186726722	FAT1	1	118	AGGAATGCTGCC	+	10.4408
chr4	186723509	186724392	nearest	-2772	FAT1,ENSG00000083857.13,protein_coding,chr4:186587783-186726722	FAT1	1	399	AGGAATGCAGCT	+	10.6128
chr4	186684994	186685158	nearest	-41646	FAT1,ENSG00000083857.13,protein_coding,chr4:186587783-186726722	FAT1	1	18	GCGCACATTCCT	-	8.4912
chr4	185115984	185116282	nearest	-27108	SLC25A4,ENSG00000151729.10,protein_coding,chr4:185143241-185150382	SLC25A4	1	112	GCCCAAATTCCT	-	8.08935
chr4	176001179	176001771	nearest	-1189	GPM6A,ENSG00000150625.16,protein_coding,chr4:175632934-176002664	GPM6A	1	207	TGGAATTTAGGA	+	7.93313
chr4	176001179	176001771	nearest	-1189	GPM6A,ENSG00000150625.16,protein_coding,chr4:175632934-176002664	GPM6A	1	63	AGTCACATTCCT	-	9.0985
chr4	171812667	171814031	nearest	1095	GALNTL6,ENSG00000174473.15,protein_coding,chr4:171812254-173041559	GALNTL6	1	-244	GGAGGAATTCCT	-	7.7934
chr4	165095305	165095887	nearest	63643	TRIM60,ENSG00000176979.12,protein_coding,chr4:165031953-165041744	TRIM60	1	-118	AAGAATGTGGGC	+	8.01438
chr4	165047790	165048547	nearest	16215	TRIM60,ENSG00000176979.12,protein_coding,chr4:165031953-165041744	TRIM60	1	13	AGGAATGCCACA	+	8.79972
chr4	164905559	164906608	nearest	29079	APELA,ENSG00000248329.5,protein_coding,chr4:164877004-164898965	APELA	1	-58	AGAGGCATTCCT	-	8.94774
chr4	164905559	164906608	nearest	29079	APELA,ENSG00000248329.5,protein_coding,chr4:164877004-164898965	APELA	1	-120	CGAGACATTCCA	-	8.30122
chr4	164876793	164877273	nearest	29	APELA,ENSG00000248329.5,protein_coding,chr4:164877004-164898965	APELA	1	-202	TTCAGAATTCCT	-	7.90834
chr4	164799472	164799704	nearest	-77416	APELA,ENSG00000248329.5,protein_coding,chr4:164877004-164898965	APELA	1	-47	AGGAATTCCTCC	+	7.7934
chr4	164799472	164799704	nearest	-77416	APELA,ENSG00000248329.5,protein_coding,chr4:164877004-164898965	APELA	1	-38	GGAGGAATTCCT	-	7.7934
chr4	164789194	164789344	nearest	-87735	APELA,ENSG00000248329.5,protein_coding,chr4:164877004-164898965	APELA	1	-39	TGGAATGCAGAA	+	9.49649
chr4	153344263	153345383	nearest	174	MND1,ENSG00000121211.7,protein_coding,chr4:153344649-153415118	MND1	1	478	GAGCACATTCCA	-	8.32403
chr4	153260212	153260440	nearest	-84323	MND1,ENSG00000121211.7,protein_coding,chr4:153344649-153415118	MND1	1	47	CTTAACATTCCA	-	7.77445
chr4	153232564	153233162	nearest	80521	TRIM2,ENSG00000109654.14,protein_coding,chr4:153152342-153339320	TRIM2	1	169	AAATGCATTCCA	-	8.83648
chr4	153223799	153224508	nearest	71811	TRIM2,ENSG00000109654.14,protein_coding,chr4:153152342-153339320	TRIM2	1	-172	TAGAATGTAGTT	+	8.01499
chr4	153206525	153207013	nearest	54427	TRIM2,ENSG00000109654.14,protein_coding,chr4:153152342-153339320	TRIM2	1	98	TTGTACATTCCA	-	8.34034
chr4	153143644	153143888	nearest	-8576	TRIM2,ENSG00000109654.14,protein_coding,chr4:153152342-153339320	TRIM2	1	88	CTCTGCATTCTT	-	8.08652
chr4	153127719	153128216	nearest	-24375	TRIM2,ENSG00000109654.14,protein_coding,chr4:153152342-153339320	TRIM2	1	40	AGGAATGTGCAT	+	8.21197
chr4	145935771	145937804	nearest	-1848	ZNF827,ENSG00000151612.15,protein_coding,chr4:145757627-145938635	ZNF827	1	-260	AGGAATGTTTGC	+	8.71256
chr4	145870279	145870601	nearest	-68195	ZNF827,ENSG00000151612.15,protein_coding,chr4:145757627-145938635	ZNF827	1	116	TGGAATGCACAA	+	8.4594
chr4	139227811	139228042	nearest	50708	ELF2,ENSG00000109381.19,protein_coding,chr4:139028112-139177218	ELF2	1	-15	AGGAATGCGGAA	+	9.35152
chr4	139153567	139153986	nearest	-23442	ELF2,ENSG00000109381.19,protein_coding,chr4:139028112-139177218	ELF2	1	138	AGGAATGTGACC	+	9.38309
chr4	139132895	139133303	nearest	-44119	ELF2,ENSG00000109381.19,protein_coding,chr4:139028112-139177218	ELF2	1	129	GCCTACATTCTT	-	8.46675
chr4	122796567	122797344	nearest	-29753	FGF2,ENSG00000138685.12,protein_coding,chr4:122826708-122898236	FGF2	1	89	TGGAATGTGAAT	+	7.99876
chr4	122783181	122783839	nearest	-43198	FGF2,ENSG00000138685.12,protein_coding,chr4:122826708-122898236	FGF2	1	-61	GCCAAAATTCCT	-	8.0851
chr4	122783181	122783839	nearest	-43198	FGF2,ENSG00000138685.12,protein_coding,chr4:122826708-122898236	FGF2	1	-86	ATGCGCATTCCT	-	8.33103
chr4	122746687	122746868	nearest	14075	BBS12,ENSG00000181004.9,protein_coding,chr4:122732702-122744943	BBS12	1	-27	GAGAATGCTGCT	+	7.80221
chr4	118881452	118881930	nearest	31003	SYNPO2,ENSG00000172403.10,protein_coding,chr4:118850688-119061247	SYNPO2	1	102	TGGAATGCTACC	+	9.1905
chr4	118881452	118881930	nearest	31003	SYNPO2,ENSG00000172403.10,protein_coding,chr4:118850688-119061247	SYNPO2	1	170	TGTTTCATTCCT	-	7.76299
chr4	112684666	112685179	nearest	47927	ZGRF1,ENSG00000138658.15,protein_coding,chr4:112539333-112636995	ZGRF1	1	50	CACCGCATTCCA	-	8.97552
chr4	112648493	112649174	nearest	11838	ZGRF1,ENSG00000138658.15,protein_coding,chr4:112539333-112636995	ZGRF1	1	-14	GGGAATGTATGA	+	8.0279
chr4	112648493	112649174	nearest	11838	ZGRF1,ENSG00000138658.15,protein_coding,chr4:112539333-112636995	ZGRF1	1	318	AGGAATGTTATC	+	8.72137
chr4	108117510	108117737	nearest	-51333	LEF1,ENSG00000138795.9,protein_coding,chr4:108047545-108168956	LEF1	1	12	AGGAATGTCTGA	+	8.01438
chr4	107379612	107379762	nearest	95881	DKK2,ENSG00000155011.8,protein_coding,chr4:106921802-107283806	DKK2	1	8	GCTCACATTCCT	-	8.58539
chr4	107290718	107291000	nearest	7053	DKK2,ENSG00000155011.8,protein_coding,chr4:106921802-107283806	DKK2	1	15	TGGAATGTCATC	+	8.01698
chr4	104490871	104491791	nearest	-3570	CXXC4,ENSG00000168772.10,protein_coding,chr4:104468312-104494901	CXXC4	1	-161	TCATGCATTCCC	-	8.14696
chr4	98637062	98637274	nearest	-21461	TSPAN5,ENSG00000168785.7,protein_coding,chr4:98470367-98658629	TSPAN5	1	98	ACGCACATTCCA	-	7.89921
chr4	94692581	94692830	nearest	-65263	BMPR1B,ENSG00000138696.10,protein_coding,chr4:94757968-95158448	BMPR1B	1	-33	CGCTGAATTCCA	-	8.64643
chr4	78813517	78813729	nearest	37281	BMP2K,ENSG00000138756.17,protein_coding,chr4:78776342-78916372	BMP2K	1	8	TGGAATGTACTT	+	8.49181
chr4	78713818	78714304	nearest	-62281	BMP2K,ENSG00000138756.17,protein_coding,chr4:78776342-78916372	BMP2K	1	97	TGGAATGTCATC	+	8.01698
chr4	78706385	78706640	nearest	-69830	BMP2K,ENSG00000138756.17,protein_coding,chr4:78776342-78916372	BMP2K	1	59	AGGAATGTCACC	+	8.98185
chr4	76515225	76515375	nearest	80200	SHROOM3,ENSG00000138771.14,protein_coding,chr4:76435100-76783253	SHROOM3	1	55	CACTGCATTCCA	-	9.42789
chr4	76459249	76459732	nearest	24390	SHROOM3,ENSG00000138771.14,protein_coding,chr4:76435100-76783253	SHROOM3	1	-158	GACTACATTCCT	-	10.1209
chr4	76456789	76457434	nearest	22011	SHROOM3,ENSG00000138771.14,protein_coding,chr4:76435100-76783253	SHROOM3	1	-100	TGGAATGTCATC	+	8.01698
chr4	75705280	75705667	nearest	-19052	G3BP2,ENSG00000138757.14,protein_coding,chr4:75642782-75724525	G3BP2	1	88	GAGCACATTCCA	-	8.32403
chr4	75514061	75514824	nearest	-322	RCHY1,ENSG00000163743.13,protein_coding,chr4:75479037-75514764	RCHY1	1	-132	CCTCACATTCCA	-	7.77334
chr4	68430289	68430847	nearest	-16881	TMPRSS11E,ENSG00000087128.9,protein_coding,chr4:68447449-68497604	TMPRSS11E	1	-257	AGGAATGATGCA	+	8.24927
chr4	68430289	68430847	nearest	-16881	TMPRSS11E,ENSG00000087128.9,protein_coding,chr4:68447449-68497604	TMPRSS11E	1	-49	TAATGCATTCCT	-	9.12728
chr4	68413074	68413738	nearest	-34043	TMPRSS11E,ENSG00000087128.9,protein_coding,chr4:68447449-68497604	TMPRSS11E	1	303	AGGAATGCGAGG	+	8.19979
chr4	68407232	68407644	nearest	-40011	TMPRSS11E,ENSG00000087128.9,protein_coding,chr4:68447449-68497604	TMPRSS11E	1	68	TGGAATGTCATC	+	8.01698
chr4	55997877	55998223	nearest	49179	CEP135,ENSG00000174799.10,protein_coding,chr4:55948871-56033363	CEP135	1	41	TTCTTCATTCCT	-	7.91355
chr4	55926749	55926986	nearest	-22004	CEP135,ENSG00000174799.10,protein_coding,chr4:55948871-56033363	CEP135	1	52	ATTTGCATTCCA	-	8.57019
chr4	54232862	54233607	nearest	4137	PDGFRA,ENSG00000134853.11,protein_coding,chr4:54229097-54298247	PDGFRA	1	-296	CTCAGCATTCCC	-	8.30372
chr4	54230334	54230606	nearest	1373	PDGFRA,ENSG00000134853.11,protein_coding,chr4:54229097-54298247	PDGFRA	1	-107	CCTCGCATTCCA	-	7.89239
chr4	48285293	48286277	nearest	15921	TEC,ENSG00000135605.12,protein_coding,chr4:48135783-48269864	TEC	1	-467	AGGAATGCAAAT	+	8.87759
chr4	48285293	48286277	nearest	15921	TEC,ENSG00000135605.12,protein_coding,chr4:48135783-48269864	TEC	1	448	AGGAATTTTTCT	+	7.78674
chr4	48285293	48286277	nearest	15921	TEC,ENSG00000135605.12,protein_coding,chr4:48135783-48269864	TEC	1	26	TGAGACATTCCA	-	8.50469
chr4	48280468	48280713	nearest	10726	TEC,ENSG00000135605.12,protein_coding,chr4:48135783-48269864	TEC	1	-82	TTAAACATTCCT	-	8.41674
chr4	42172350	42172762	nearest	19678	BEND4,ENSG00000188848.15,protein_coding,chr4:42110938-42152878	BEND4	1	157	TAGAATGTAGAT	+	7.88012
chr4	40055864	40056041	nearest	-874	N4BP2,ENSG00000078177.13,protein_coding,chr4:40056826-40158252	N4BP2	1	43	GCACACATTCCC	-	7.87672
chr4	40046461	40046643	nearest	-10274	N4BP2,ENSG00000078177.13,protein_coding,chr4:40056826-40158252	N4BP2	1	-26	TGGAATGTGTTA	+	8.24845
chr4	16145026	16145176	nearest	60723	PROM1,ENSG00000007062.11,protein_coding,chr4:15963076-16084378	PROM1	1	10	AGGAATGTGTTC	+	8.85704
chr4	16076785	16077499	nearest	-7236	PROM1,ENSG00000007062.11,protein_coding,chr4:15963076-16084378	PROM1	1	39	TGGAATGTCTCG	+	8.30122
chr4	16071075	16071320	nearest	-13181	PROM1,ENSG00000007062.11,protein_coding,chr4:15963076-16084378	PROM1	1	20	AACTGAATTCCA	-	8.20902
chr4	16038005	16038203	nearest	-46274	PROM1,ENSG00000007062.11,protein_coding,chr4:15963076-16084378	PROM1	1	-55	TGGAATGTGAGA	+	7.9768
chr4	7082013	7082338	nearest	13978	GRPEL1,ENSG00000109519.12,protein_coding,chr4:7058906-7068197	GRPEL1	1	110	TGCTGAATTCCT	-	9.15729
chr4	4852634	4853370	nearest	-6664	MSX1,ENSG00000163132.6,protein_coding,chr4:4859666-4863936	MSX1	1	313	AGGAATGTCGCC	+	9.92475
chr4	4625628	4625853	nearest	83394	STX18,ENSG00000168818.9,protein_coding,chr4:4415742-4542346	STX18	1	14	GCCTGCATTCCT	-	10.0997
chr4	4519409	4519606	nearest	-22839	STX18,ENSG00000168818.9,protein_coding,chr4:4415742-4542346	STX18	1	-51	GGGAATGCATTT	+	8.30378
chr4	1792812	1793880	nearest	39	FGFR3,ENSG00000068078.17,protein_coding,chr4:1793307-1808872	FGFR3	1	-499	TGGAATGCCGTC	+	9.07894
chr4	1777637	1778481	nearest	-15248	FGFR3,ENSG00000068078.17,protein_coding,chr4:1793307-1808872	FGFR3	1	37	AGGAATGCAGAG	+	9.60042
chr4	1777637	1778481	nearest	-15248	FGFR3,ENSG00000068078.17,protein_coding,chr4:1793307-1808872	FGFR3	1	303	GGGAATGCAGCG	+	9.55267
chr4	1777637	1778481	nearest	-15248	FGFR3,ENSG00000068078.17,protein_coding,chr4:1793307-1808872	FGFR3	1	258	CGCCACATTCCT	-	9.82133
chr4	241851	242535	nearest	-63128	ZNF732,ENSG00000186777.11,protein_coding,chr4:270675-305321	ZNF732	1	-206	TGCCACATTCCC	-	9.18471
chr3	195950289	195950521	nearest	38460	TNK2,ENSG00000061938.16,protein_coding,chr3:195863364-195911945	TNK2	1	55	AGGAATTCAGGA	+	8.35959
chr3	195933082	195933270	nearest	21231	TNK2,ENSG00000061938.16,protein_coding,chr3:195863364-195911945	TNK2	1	54	AGGAATGAAGTC	+	8.34961
chr3	195910171	195910448	nearest	-1636	TNK2,ENSG00000061938.16,protein_coding,chr3:195863364-195911945	TNK2	1	0	ACCTTCATTCCT	-	7.92478
chr3	186908878	186909849	nearest	-21122	ST6GAL1,ENSG00000073849.14,protein_coding,chr3:186930485-187078553	ST6GAL1	1	204	GCTGGCATTCCA	-	7.99581
chr3	186886941	186887612	nearest	-43209	ST6GAL1,ENSG00000073849.14,protein_coding,chr3:186930485-187078553	ST6GAL1	1	47	CGAGACATTCCA	-	8.30122
chr3	179681139	179682038	nearest	28833	USP13,ENSG00000058056.8,protein_coding,chr3:179652755-179789401	USP13	1	13	AGGTACATTCCT	-	9.45668
chr3	177262338	177262722	nearest	65134	TBL1XR1,ENSG00000177565.15,protein_coding,chr3:177019355-177197396	TBL1XR1	1	53	CAGCACATTCCT	-	8.12678
chr3	177198923	177199772	nearest	1951	TBL1XR1,ENSG00000177565.15,protein_coding,chr3:177019355-177197396	TBL1XR1	1	-171	GGGAATGTTGGA	+	8.38276
chr3	177131893	177132043	nearest	-65428	TBL1XR1,ENSG00000177565.15,protein_coding,chr3:177019355-177197396	TBL1XR1	1	17	GTGTACATTCCT	-	8.94893
chr3	170343824	170344159	nearest	-13687	SKIL,ENSG00000136603.13,protein_coding,chr3:170357678-170396835	SKIL	1	118	GGGAATGCAGCC	+	10.0573
chr3	170320271	170320943	nearest	-37071	SKIL,ENSG00000136603.13,protein_coding,chr3:170357678-170396835	SKIL	1	134	GGGAATGCAGCC	+	10.0573
chr3	170307934	170308421	nearest	-49501	SKIL,ENSG00000136603.13,protein_coding,chr3:170357678-170396835	SKIL	1	-194	TAAGGCATTCCA	-	7.96627
chr3	153221830	153222083	nearest	59686	RAP2B,ENSG00000181467.3,protein_coding,chr3:153162270-153167173	RAP2B	1	35	AGGAATGCAGCA	+	10.5962
chr3	153209688	153209959	nearest	47553	RAP2B,ENSG00000181467.3,protein_coding,chr3:153162270-153167173	RAP2B	1	47	AGGAATGTAGCA	+	10.4772
chr3	153138336	153138520	nearest	-23842	RAP2B,ENSG00000181467.3,protein_coding,chr3:153162270-153167173	RAP2B	1	-64	TGGAATGTGAGT	+	7.9934
chr3	153138336	153138520	nearest	-23842	RAP2B,ENSG00000181467.3,protein_coding,chr3:153162270-153167173	RAP2B	1	89	AATAGCATTCCT	-	8.55584
chr3	153107525	153107913	nearest	-54551	RAP2B,ENSG00000181467.3,protein_coding,chr3:153162270-153167173	RAP2B	1	78	ATTCACATTCCT	-	8.30616
chr3	153072812	153073300	nearest	-89214	RAP2B,ENSG00000181467.3,protein_coding,chr3:153162270-153167173	RAP2B	1	-66	TGCCACATTCCT	-	10.0248
chr3	153072812	153073300	nearest	-89214	RAP2B,ENSG00000181467.3,protein_coding,chr3:153162270-153167173	RAP2B	1	-130	CCACACATTCCA	-	7.90476
chr3	147421579	147421753	nearest	14806	ZIC4,ENSG00000174963.17,protein_coding,chr3:147386046-147406860	ZIC4	1	75	AGGAATGTCGCG	+	9.4201
chr3	147409600	147410023	nearest	2951	ZIC4,ENSG00000174963.17,protein_coding,chr3:147386046-147406860	ZIC4	1	-96	GCTCACATTCCT	-	8.58539
chr3	147408914	147409461	nearest	2327	ZIC4,ENSG00000174963.17,protein_coding,chr3:147386046-147406860	ZIC4	1	-192	AGGAATGCATAT	+	9.00901
chr3	147408914	147409461	nearest	2327	ZIC4,ENSG00000174963.17,protein_coding,chr3:147386046-147406860	ZIC4	1	82	GGGAATGCGGGC	+	8.80725
chr3	147391774	147392423	nearest	-1324	ZIC1,ENSG00000152977.9,protein_coding,chr3:147393422-147510293	ZIC1	1	-140	AGCAGCATTCTT	-	8.6423
chr3	147384607	147385166	nearest	-8536	ZIC1,ENSG00000152977.9,protein_coding,chr3:147393422-147510293	ZIC1	1	275	CCCAGCATTCCC	-	8.29835
chr3	147384607	147385166	nearest	-8536	ZIC1,ENSG00000152977.9,protein_coding,chr3:147393422-147510293	ZIC1	1	-268	CTCTGCATTCTA	-	7.77912
chr3	141107043	141107513	nearest	55876	SPSB4,ENSG00000175093.4,protein_coding,chr3:141051402-141148611	SPSB4	1	-189	TGGAATGTGCTG	+	7.81938
chr3	141107043	141107513	nearest	55876	SPSB4,ENSG00000175093.4,protein_coding,chr3:141051402-141148611	SPSB4	1	88	AGGAATGCAAAA	+	8.86099
chr3	141104147	141104352	nearest	52847	SPSB4,ENSG00000175093.4,protein_coding,chr3:141051402-141148611	SPSB4	1	52	TGGAATGTGCTT	+	8.03944
chr3	126267133	126267905	nearest	69525	ALDH1L1,ENSG00000144908.13,protein_coding,chr3:126103562-126197994	ALDH1L1	1	-8	CCGTACATTCCA	-	8.13152
chr3	126267133	126267905	nearest	69525	ALDH1L1,ENSG00000144908.13,protein_coding,chr3:126103562-126197994	ALDH1L1	1	-44	CCCTGCATTCCT	-	9.59506
chr3	126265429	126265615	nearest	67528	ALDH1L1,ENSG00000144908.13,protein_coding,chr3:126103562-126197994	ALDH1L1	1	-26	AAGAATGTAACT	+	8.03696
chr3	125898853	125899660	nearest	-37783	ALG1L,ENSG00000189366.9,protein_coding,chr3:125929275-125937039	ALG1L	1	45	TGGAATGTCTCA	+	8.50469
chr3	117165591	117166115	nearest	26464	LSAMP,ENSG00000185565.11,protein_coding,chr3:115802363-117139389	LSAMP	1	-232	TGGAATGCATGA	+	8.67965
chr3	117165591	117166115	nearest	26464	LSAMP,ENSG00000185565.11,protein_coding,chr3:115802363-117139389	LSAMP	1	125	AGGAATGCTAAT	+	8.42097
chr3	117104813	117105258	nearest	-34354	LSAMP,ENSG00000185565.11,protein_coding,chr3:115802363-117139389	LSAMP	1	-133	AGGAATGTATTC	+	9.30941
chr3	117104813	117105258	nearest	-34354	LSAMP,ENSG00000185565.11,protein_coding,chr3:115802363-117139389	LSAMP	1	-45	GCCTGAATTCCC	-	7.82069
chr3	115614993	115615324	nearest	-8166	GAP43,ENSG00000172020.12,protein_coding,chr3:115623324-115721490	GAP43	1	-67	TGGAATGCTTTG	+	8.1598
chr3	115554118	115554642	nearest	-68944	GAP43,ENSG00000172020.12,protein_coding,chr3:115623324-115721490	GAP43	1	-111	TGGAATGTTCTT	+	8.03519
chr3	115217646	115218751	nearest	70927	ZBTB20,ENSG00000181722.15,protein_coding,chr3:114338094-115147271	ZBTB20	1	388	GCCAAAATTCCA	-	7.7777
chr3	113155548	113155990	nearest	-55234	BOC,ENSG00000144857.14,protein_coding,chr3:113211003-113287459	BOC	1	162	TACTGCATTCCA	-	9.63136
chr3	112699765	112700000	nearest	50352	CCDC80,ENSG00000091986.15,protein_coding,chr3:112596794-112649530	CCDC80	1	2	AGGAATGCTGCC	+	10.4408
chr3	112672701	112672931	nearest	23286	CCDC80,ENSG00000091986.15,protein_coding,chr3:112596794-112649530	CCDC80	1	31	CCCTGCATTCTA	-	7.77376
chr3	112664836	112665415	nearest	15595	CCDC80,ENSG00000091986.15,protein_coding,chr3:112596794-112649530	CCDC80	1	234	AGGAATGAAGCC	+	9.00708
chr3	112647191	112647400	nearest	-2235	CCDC80,ENSG00000091986.15,protein_coding,chr3:112596794-112649530	CCDC80	1	19	AGGAATGCTAGG	+	8.19555
chr3	112647191	112647400	nearest	-2235	CCDC80,ENSG00000091986.15,protein_coding,chr3:112596794-112649530	CCDC80	1	28	AGGAATGCTGCC	+	10.4408
chr3	112564230	112564924	nearest	2531	ATG3,ENSG00000144848.10,protein_coding,chr3:112532509-112562046	ATG3	1	-50	CGAGACATTCCA	-	8.30122
chr3	111989149	111989375	nearest	-9402	TAGLN3,ENSG00000144834.12,protein_coding,chr3:111998664-112013887	TAGLN3	1	37	GGGAATGTAAGC	+	8.19766
chr3	109369369	109369874	nearest	32049	DPPA4,ENSG00000121570.12,protein_coding,chr3:109326141-109337572	DPPA4	1	30	GGCTAAATTCCT	-	9.33942
chr3	109224270	109224701	nearest	-92032	DPPA2,ENSG00000163530.4,protein_coding,chr3:109293788-109316517	DPPA2	1	-74	GGGAATGCAGGC	+	9.25962
chr3	100272766	100273378	nearest	12072	TBC1D23,ENSG00000036054.12,protein_coding,chr3:100261000-100325251	TBC1D23	1	-131	CGAGACATTCCA	-	8.30122
chr3	100260614	100261485	nearest	49	TBC1D23,ENSG00000036054.12,protein_coding,chr3:100261000-100325251	TBC1D23	1	-382	TGGAATGAAGAC	+	7.90734
chr3	93965150	93965633	nearest	-8675	PROS1,ENSG00000184500.14,protein_coding,chr3:93873033-93974066	PROS1	1	151	GATTACATTCCT	-	9.17799
chr3	71729692	71730303	nearest	-24053	GPR27,ENSG00000170837.2,protein_coding,chr3:71754050-71756496	GPR27	1	-206	GCCTACATTCCA	-	9.67326
chr3	71584560	71584947	nearest	764	FOXP1,ENSG00000114861.18,protein_coding,chr3:70954693-71583989	FOXP1	1	76	AGGAATGTGCAA	+	8.19537
chr3	62318485	62319608	nearest	73	C3orf14,ENSG00000114405.10,protein_coding,chr3:62318973-62336213	C3orf14	1	-342	TGGGACATTCCA	-	8.27908
chr3	62233143	62233528	nearest	-85638	C3orf14,ENSG00000114405.10,protein_coding,chr3:62318973-62336213	C3orf14	1	147	TGGAATGCAAGC	+	8.84942
chr3	62229957	62230163	nearest	-88913	C3orf14,ENSG00000114405.10,protein_coding,chr3:62318973-62336213	C3orf14	1	-70	AAAAACATTCCA	-	8.2608
chr3	58622549	58622729	nearest	-4971	FAM107A,ENSG00000168309.16,protein_coding,chr3:58564117-58627610	FAM107A	1	-3	TGGAATGCAGAG	+	9.29303
chr3	58288998	58289697	nearest	-16900	RPP14,ENSG00000163684.11,protein_coding,chr3:58306247-58324695	RPP14	1	-246	TAGAATGCAGTG	+	7.91399
chr3	50529724	50530298	nearest	25767	CACNA2D2,ENSG00000007402.11,protein_coding,chr3:50362799-50504244	CACNA2D2	1	230	GTGAACATTCCT	-	8.49231
chr3	50529724	50530298	nearest	25767	CACNA2D2,ENSG00000007402.11,protein_coding,chr3:50362799-50504244	CACNA2D2	1	-148	ATCAACATTCCT	-	9.24481
chr3	47319007	47319288	nearest	35696	KIF9,ENSG00000088727.12,protein_coding,chr3:47228026-47283451	KIF9	1	103	ACCAGCATTCTT	-	7.8446
chr3	47281609	47281766	nearest	-1230	KLHL18,ENSG00000114648.11,protein_coding,chr3:47282917-47346816	KLHL18	1	-12	GGGAATGTCTCT	+	7.98859
chr3	47260510	47260920	nearest	-22202	KLHL18,ENSG00000114648.11,protein_coding,chr3:47282917-47346816	KLHL18	1	1	AGGAATTCAACT	+	8.23099
chr3	47260003	47260164	nearest	-22834	KLHL18,ENSG00000114648.11,protein_coding,chr3:47282917-47346816	KLHL18	1	-33	TGGAATGTCTCG	+	8.30122
chr3	46603704	46603969	nearest	23737	LRRC2,ENSG00000163827.12,protein_coding,chr3:46515423-46580099	LRRC2	1	102	AATTGCATTCCC	-	8.17236
chr3	46603704	46603969	nearest	23737	LRRC2,ENSG00000163827.12,protein_coding,chr3:46515423-46580099	LRRC2	1	-2	TTTTGCATTCCA	-	8.55359
chr3	46574136	46574676	nearest	-149	TDGF1,ENSG00000241186.7,protein_coding,chr3:46574555-46626543	TDGF1	1	80	CCCAGCATTCCT	-	9.13845
chr3	46558169	46558737	nearest	-16102	TDGF1,ENSG00000241186.7,protein_coding,chr3:46574555-46626543	TDGF1	1	-181	AGGAATGCCATT	+	8.15885
chr3	46549443	46549904	nearest	-24882	TDGF1,ENSG00000241186.7,protein_coding,chr3:46574555-46626543	TDGF1	1	-202	CCTCACATTCCT	-	8.08073
chr3	43071331	43071597	nearest	-34612	POMGNT2,ENSG00000144647.5,protein_coding,chr3:43079232-43106076	POMGNT2	1	-116	AGGAATGCCAGA	+	8.00202
chr3	37996901	37997103	nearest	8943	VILL,ENSG00000136059.14,protein_coding,chr3:37988059-38007188	VILL	1	-72	TGGAATGCAGCA	+	10.2888
chr3	37946000	37946346	nearest	-41886	VILL,ENSG00000136059.14,protein_coding,chr3:37988059-38007188	VILL	1	-17	GGCTGCATTCCC	-	10.0573
chr3	37936146	37936637	nearest	-51668	VILL,ENSG00000136059.14,protein_coding,chr3:37988059-38007188	VILL	1	96	AGGAATGTAATG	+	8.67333
chr3	37936146	37936637	nearest	-51668	VILL,ENSG00000136059.14,protein_coding,chr3:37988059-38007188	VILL	1	175	GGATGCATTCCA	-	9.77854
chr3	25143478	25143699	nearest	-30744	RARB,ENSG00000077092.18,protein_coding,chr3:25174332-25597932	RARB	1	-88	GGAGGCATTCCA	-	8.92493
chr3	19957380	19957765	nearest	10493	RAB5A,ENSG00000144566.10,protein_coding,chr3:19947079-19985175	RAB5A	1	60	CACTGCATTCCA	-	9.42789
chr3	9704307	9705382	nearest	1037	CPNE9,ENSG00000144550.12,protein_coding,chr3:9703807-9729908	CPNE9	1	163	TGGAATTCTGGC	+	7.89676
chr3	1092777	1092927	nearest	276	CNTN6,ENSG00000134115.12,protein_coding,chr3:1092576-1404217	CNTN6	1	38	AGGAATGCAGCA	+	10.5962
chr3	1087378	1087579	nearest	-5098	CNTN6,ENSG00000134115.12,protein_coding,chr3:1092576-1404217	CNTN6	1	17	TGGAATGTGTGC	+	8.40941
chr3	1087378	1087579	nearest	-5098	CNTN6,ENSG00000134115.12,protein_coding,chr3:1092576-1404217	CNTN6	1	-48	CACAGCATTCCT	-	9.27868
chr3	1034677	1034951	nearest	-57762	CNTN6,ENSG00000134115.12,protein_coding,chr3:1092576-1404217	CNTN6	1	-126	AGGAATGCTTAA	+	8.5358
chr22	45317699	45318071	nearest	8917	FAM118A,ENSG00000100376.11,protein_coding,chr22:45308968-45341955	FAM118A	1	-54	GGCAGAATTCCA	-	8.69446
chr22	44025847	44026379	nearest	26902	PARVB,ENSG00000188677.14,protein_coding,chr22:43999211-44172949	PARVB	1	73	GCCCAAATTCCA	-	7.78195
chr22	40732598	40733326	nearest	54212	MCHR1,ENSG00000128285.4,protein_coding,chr22:40678750-40682814	MCHR1	1	146	GACAACATTCTT	-	8.15036
chr22	37807487	37808201	nearest	-61	GCAT,ENSG00000100116.16,protein_coding,chr22:37807905-37817176	GCAT	1	-172	GGGAATGCGGTG	+	8.44283
chr22	35638515	35638838	nearest	725	MB,ENSG00000198125.12,protein_coding,chr22:35606764-35637951	MB	1	-124	GGGAATGTGTTC	+	8.01694
chr22	32985922	32986746	nearest	-72038	SYN3,ENSG00000185666.14,protein_coding,chr22:32512552-33058372	SYN3	1	84	TGGAATGTTTAC	+	8.41053
chr22	32985922	32986746	nearest	-72038	SYN3,ENSG00000185666.14,protein_coding,chr22:32512552-33058372	SYN3	1	-33	ACTGGCATTCCT	-	8.01862
chr22	31253996	31254460	nearest	-38306	PIK3IP1,ENSG00000100100.12,protein_coding,chr22:31281593-31292534	PIK3IP1	1	-155	AAAGGCATTCCT	-	8.29027
chr22	27780152	27780561	nearest	-21142	MN1,ENSG00000169184.5,protein_coding,chr22:27748277-27801498	MN1	1	97	AGGAATTTTGCA	+	8.58161
chr22	27744176	27744599	nearest	-57111	MN1,ENSG00000169184.5,protein_coding,chr22:27748277-27801498	MN1	1	-100	AGGAATGCCTGC	+	8.43463
chr22	26655487	26655757	nearest	33658	CRYBA4,ENSG00000196431.3,protein_coding,chr22:26621964-26630672	CRYBA4	1	76	TGGAATGTTCTA	+	8.0186
chr22	26655487	26655757	nearest	33658	CRYBA4,ENSG00000196431.3,protein_coding,chr22:26621964-26630672	CRYBA4	1	127	ATCAGAATTCCT	-	7.92493
chr22	26644964	26645629	nearest	23332	CRYBA4,ENSG00000196431.3,protein_coding,chr22:26621964-26630672	CRYBA4	1	-156	AGGAATTCTGAT	+	7.92493
chr22	26632148	26633186	nearest	10703	CRYBA4,ENSG00000196431.3,protein_coding,chr22:26621964-26630672	CRYBA4	1	-349	TGGAATGTCATC	+	8.01698
chr22	26568257	26568781	nearest	-28198	TPST2,ENSG00000128294.15,protein_coding,chr22:26521983-26596717	TPST2	1	-122	GGTTGCATTCCC	-	9.11442
chr22	24211002	24211708	nearest	30096	SUSD2,ENSG00000099994.10,protein_coding,chr22:24181259-24189110	SUSD2	1	-18	CGAGACATTCCA	-	8.30122
chr22	24180671	24181738	nearest	-55	SUSD2,ENSG00000099994.10,protein_coding,chr22:24181259-24189110	SUSD2	1	102	AGGAATGTGCTA	+	8.33024
chr22	21037790	21038327	nearest	5218	SLC7A4,ENSG00000099960.12,protein_coding,chr22:21028718-21032840	SLC7A4	1	5	GGCCACATTCCT	-	10.326
chr22	21037790	21038327	nearest	5218	SLC7A4,ENSG00000099960.12,protein_coding,chr22:21028718-21032840	SLC7A4	1	-144	TGCTACATTCCA	-	10.1698
chr22	21032482	21033106	nearest	-46	SLC7A4,ENSG00000099960.12,protein_coding,chr22:21028718-21032840	SLC7A4	1	261	GGGAATGCATTC	+	8.58837
chr22	20956413	20956634	nearest	-8585	AIFM3,ENSG00000183773.15,protein_coding,chr22:20965108-20981360	AIFM3	1	36	GGAAGCATTCTT	-	8.11542
chr22	18935987	18936484	nearest	-318	PRODH,ENSG00000100033.16,protein_coding,chr22:18912777-18936553	PRODH	1	7	GGGAATGCAGGG	+	8.75497
chr21	17932879	17933591	nearest	31972	CHODL,ENSG00000154645.13,protein_coding,chr21:17901263-18267373	CHODL	1	-67	TGAGACATTCCA	-	8.50469
chr21	17507722	17507873	nearest	-4585	CXADR,ENSG00000154639.18,protein_coding,chr21:17512382-17593579	CXADR	1	-31	GAACACATTCCA	-	8.54964
chr20	62961288	62961922	nearest	8958	SLC17A9,ENSG00000101194.17,protein_coding,chr20:62952647-62969585	SLC17A9	1	94	AGGAATGTGAAT	+	8.30616
chr20	51889409	51889964	nearest	87166	SALL4,ENSG00000101115.12,protein_coding,chr20:51782331-51802520	SALL4	1	221	TGGAATGTAGCT	+	10.1864
chr20	51862806	51863076	nearest	60421	SALL4,ENSG00000101115.12,protein_coding,chr20:51782331-51802520	SALL4	1	33	TGGAATGCTCTC	+	8.43884
chr20	49626026	49626176	nearest	57955	PTGIS,ENSG00000124212.5,protein_coding,chr20:49503874-49568146	PTGIS	1	-65	TGGAATGCAGCC	+	10.59
chr20	49610579	49611540	nearest	42913	PTGIS,ENSG00000124212.5,protein_coding,chr20:49503874-49568146	PTGIS	1	326	TGTTGCATTCCT	-	9.65333
chr20	49541779	49542233	nearest	-26140	PTGIS,ENSG00000124212.5,protein_coding,chr20:49503874-49568146	PTGIS	1	59	AACAGCATTCCC	-	8.65864
chr20	45823928	45824503	nearest	-9530	TNNC2,ENSG00000101470.9,protein_coding,chr20:45823214-45833745	TNNC2	1	-87	GTCTGCATTCCT	-	10.1051
chr20	44354884	44356264	nearest	-126	HNF4A,ENSG00000101076.16,protein_coding,chr20:44355700-44434596	HNF4A	1	544	GGGAATGCATCT	+	8.96126
chr20	43677245	43677601	nearest	10404	MYBL2,ENSG00000101057.15,protein_coding,chr20:43667019-43716496	MYBL2	1	-158	TGGAATGTGCTG	+	7.81938
chr20	43665644	43666192	nearest	-1101	MYBL2,ENSG00000101057.15,protein_coding,chr20:43667019-43716496	MYBL2	1	64	AGGAATTTACCC	+	8.30233
chr20	39049834	39050527	nearest	87881	DHX35,ENSG00000101452.14,protein_coding,chr20:38962299-39039723	DHX35	1	-292	AGGAATGTTGGG	+	9.01939
chr20	36968299	36968621	nearest	16617	SAMHD1,ENSG00000101347.8,protein_coding,chr20:36890229-36951843	SAMHD1	1	-113	TGGAATGTCTCG	+	8.30122
chr20	36951420	36952278	nearest	6	SAMHD1,ENSG00000101347.8,protein_coding,chr20:36890229-36951843	SAMHD1	1	342	GTCTTCATTCCA	-	7.90734
chr20	36108810	36109624	nearest	17713	EPB41L1,ENSG00000088367.20,protein_coding,chr20:36091504-36232799	EPB41L1	1	-322	TGGAATGTTACC	+	9.07144
chr20	36085607	36086308	nearest	-5547	EPB41L1,ENSG00000088367.20,protein_coding,chr20:36091504-36232799	EPB41L1	1	-325	TAGGGCATTCCT	-	8.04806
chr20	31720039	31720423	nearest	-3758	BCL2L1,ENSG00000171552.12,protein_coding,chr20:31664452-31723989	BCL2L1	1	94	AGTTGCATTCTT	-	8.15602
chr20	31712463	31713129	nearest	-11193	BCL2L1,ENSG00000171552.12,protein_coding,chr20:31664452-31723989	BCL2L1	1	4	GGGAATGTTTCC	+	8.67017
chr20	31704102	31704863	nearest	-19507	BCL2L1,ENSG00000171552.12,protein_coding,chr20:31664452-31723989	BCL2L1	1	252	TGGAATGCACCC	+	9.55293
chr20	31704102	31704863	nearest	-19507	BCL2L1,ENSG00000171552.12,protein_coding,chr20:31664452-31723989	BCL2L1	1	321	CTTTGCATTCCT	-	8.65753
chr20	21125522	21126474	nearest	15	KIZ,ENSG00000088970.15,protein_coding,chr20:21125983-21246622	KIZ	1	-254	GGGAATGCGCCT	+	8.28328
chr20	21125317	21125509	nearest	-570	KIZ,ENSG00000088970.15,protein_coding,chr20:21125983-21246622	KIZ	1	-52	GGGAATGTACAC	+	8.10884
chr20	21060426	21060894	nearest	-65323	KIZ,ENSG00000088970.15,protein_coding,chr20:21125983-21246622	KIZ	1	7	TGGAATGTCATC	+	8.01698
chr20	21027625	21027843	nearest	-98249	KIZ,ENSG00000088970.15,protein_coding,chr20:21125983-21246622	KIZ	1	-91	TGGAATTCAGTG	+	7.98896
chr20	19924967	19925262	nearest	38593	RIN2,ENSG00000132669.12,protein_coding,chr20:19886521-20002457	RIN2	1	21	GGGCACATTCCT	-	9.2889
chr20	19802558	19803193	nearest	-83646	RIN2,ENSG00000132669.12,protein_coding,chr20:19886521-20002457	RIN2	1	-263	TGAAGAATTCCT	-	7.8892
chr20	18052850	18053722	nearest	-5902	OVOL2,ENSG00000125850.10,protein_coding,chr20:17956979-18059188	OVOL2	1	-309	TGGAATGTACAT	+	8.35694
chr20	14422852	14423794	nearest	85707	FLRT3,ENSG00000125848.9,protein_coding,chr20:14322988-14337616	FLRT3	1	-178	TGGAATGCTCTG	+	7.93419
chr20	14363695	14364088	nearest	26275	FLRT3,ENSG00000125848.9,protein_coding,chr20:14322988-14337616	FLRT3	1	-8	GGGAATGTGTCA	+	8.37323
chr20	14337392	14337870	nearest	15	FLRT3,ENSG00000125848.9,protein_coding,chr20:14322988-14337616	FLRT3	1	-31	GAGAGCATTCCA	-	8.43884
chr20	14264921	14265203	nearest	-72554	FLRT3,ENSG00000125848.9,protein_coding,chr20:14322988-14337616	FLRT3	1	-89	TTCAAAATTCCT	-	7.78927
chr20	10647501	10647911	nearest	-26401	JAG1,ENSG00000101384.11,protein_coding,chr20:10637684-10674107	JAG1	1	11	AGGAATGCTAAA	+	8.40437
chr20	10647059	10647209	nearest	-26973	JAG1,ENSG00000101384.11,protein_coding,chr20:10637684-10674107	JAG1	1	25	TGCGGCATTCCT	-	9.74262
chr20	10618719	10619812	nearest	-54842	JAG1,ENSG00000101384.11,protein_coding,chr20:10637684-10674107	JAG1	1	82	AGGAATTTGGGA	+	7.78816
chr20	10249844	10250119	nearest	31151	SNAP25,ENSG00000132639.12,protein_coding,chr20:10218830-10307418	SNAP25	1	87	GACCACATTCCT	-	9.66852
chr20	10225844	10226020	nearest	7102	SNAP25,ENSG00000132639.12,protein_coding,chr20:10218830-10307418	SNAP25	1	23	TGCCTCATTCCT	-	8.25352
chr20	8974207	8974779	nearest	-94270	PLCB4,ENSG00000101333.16,protein_coding,chr20:9068763-9481242	PLCB4	1	-190	GACCAAATTCCA	-	7.92218
chr20	3687686	3687952	nearest	5573	ADAM33,ENSG00000149451.17,protein_coding,chr20:3667965-3682246	ADAM33	1	-100	GGTGGCATTCCC	-	8.26082
chr20	3316185	3316335	nearest	77070	SLC4A11,ENSG00000088836.12,protein_coding,chr20:3227417-3239190	SLC4A11	1	0	TTTTACATTCCA	-	8.43453
chr20	3250106	3250400	nearest	11063	SLC4A11,ENSG00000088836.12,protein_coding,chr20:3227417-3239190	SLC4A11	1	130	AGGAATGCCCTT	+	8.06466
chr20	3242062	3242511	nearest	3096	SLC4A11,ENSG00000088836.12,protein_coding,chr20:3227417-3239190	SLC4A11	1	123	AGGAATGTTAAA	+	8.28531
chr20	791137	791388	nearest	15247	SLC52A3,ENSG00000101276.14,protein_coding,chr20:760080-776015	SLC52A3	1	-44	TGGAATGCATGC	+	8.98084
chr2	237421517	237421883	nearest	7325	COL6A3,ENSG00000163359.15,protein_coding,chr2:237324003-237414375	COL6A3	1	-166	TCCTTCATTCCT	-	7.90819
chr2	237354364	237354577	nearest	-59905	COL6A3,ENSG00000163359.15,protein_coding,chr2:237324003-237414375	COL6A3	1	68	AAGAATGCAACC	+	8.44061
chr2	236605407	236605610	nearest	37721	ACKR3,ENSG00000144476.5,protein_coding,chr2:236567787-236582358	ACKR3	1	3	CGATGCATTCCT	-	9.58129
chr2	236583960	236584777	nearest	16581	ACKR3,ENSG00000144476.5,protein_coding,chr2:236567787-236582358	ACKR3	1	-186	GGGAATGCTCCA	+	8.26243
chr2	236578739	236579465	nearest	11315	ACKR3,ENSG00000144476.5,protein_coding,chr2:236567787-236582358	ACKR3	1	4	AGGAATGTCTGA	+	8.01438
chr2	233251257	233252095	nearest	41625	ATG16L1,ENSG00000085978.21,protein_coding,chr2:233210051-233295674	ATG16L1	1	63	GCCGGCATTCCC	-	8.40602
chr2	233241642	233242170	nearest	31855	ATG16L1,ENSG00000085978.21,protein_coding,chr2:233210051-233295674	ATG16L1	1	25	AGGAATGTACCT	+	9.45668
chr2	233213683	233214249	nearest	3915	ATG16L1,ENSG00000085978.21,protein_coding,chr2:233210051-233295674	ATG16L1	1	-46	TGGAATGTCATC	+	8.01698
chr2	233129426	233130456	nearest	69974	INPP5D,ENSG00000168918.13,protein_coding,chr2:233059967-233207903	INPP5D	1	-493	TAGAATGCAGAC	+	8.28378
chr2	224433040	224433869	nearest	31369	FAM124B,ENSG00000124019.9,protein_coding,chr2:224378698-224402085	FAM124B	1	310	TGGTGAATTCCT	-	8.1202
chr2	224433040	224433869	nearest	31369	FAM124B,ENSG00000124019.9,protein_coding,chr2:224378698-224402085	FAM124B	1	233	AGCTGCATTCTT	-	9.09892
chr2	222899467	222900060	nearest	38829	ACSL3,ENSG00000123983.13,protein_coding,chr2:222860934-222944639	ACSL3	1	67	AGGAATGCCTTT	+	8.29027
chr2	222899467	222900060	nearest	38829	ACSL3,ENSG00000123983.13,protein_coding,chr2:222860934-222944639	ACSL3	1	193	GGGAATGCAGCC	+	10.0573
chr2	222882538	222882819	nearest	21744	ACSL3,ENSG00000123983.13,protein_coding,chr2:222860934-222944639	ACSL3	1	-98	TGCCGAATTCCT	-	8.70492
chr2	222864417	222864582	nearest	3565	ACSL3,ENSG00000123983.13,protein_coding,chr2:222860934-222944639	ACSL3	1	22	TGGAATGCTCCT	+	8.81172
chr2	222847896	222849478	nearest	-12247	ACSL3,ENSG00000123983.13,protein_coding,chr2:222860934-222944639	ACSL3	1	-433	TGGAATGTCATC	+	8.01698
chr2	222847896	222849478	nearest	-12247	ACSL3,ENSG00000123983.13,protein_coding,chr2:222860934-222944639	ACSL3	1	-296	AGGAATGCGCCA	+	9.10677
chr2	222838696	222839176	nearest	-21998	ACSL3,ENSG00000123983.13,protein_coding,chr2:222860934-222944639	ACSL3	1	130	CATAACATTCCA	-	7.90932
chr2	222831286	222831603	nearest	-29490	ACSL3,ENSG00000123983.13,protein_coding,chr2:222860934-222944639	ACSL3	1	137	TCCAACATTCCC	-	8.38276
chr2	222774761	222775422	nearest	-85843	ACSL3,ENSG00000123983.13,protein_coding,chr2:222860934-222944639	ACSL3	1	-158	GTCTGCATTCTA	-	8.28378
chr2	221494673	221494834	nearest	-79449	EPHA4,ENSG00000116106.11,protein_coding,chr2:221418027-221574202	EPHA4	1	43	GACTGCATTCCA	-	9.93255
chr2	214840699	214841219	nearest	31248	BARD1,ENSG00000138376.10,protein_coding,chr2:214725646-214809711	BARD1	1	-260	TGGAATGTCATC	+	8.01698
chr2	214802947	214803698	nearest	-6389	BARD1,ENSG00000138376.10,protein_coding,chr2:214725646-214809711	BARD1	1	79	TGGAATGTCTCA	+	8.50469
chr2	207847825	207848238	nearest	78468	FZD5,ENSG00000163251.3,protein_coding,chr2:207762586-207769563	FZD5	1	-14	AGGAATGTGTCA	+	9.21332
chr2	207810758	207811531	nearest	41581	FZD5,ENSG00000163251.3,protein_coding,chr2:207762586-207769563	FZD5	1	-219	TGTGACATTCCA	-	8.37326
chr2	207792506	207792656	nearest	23018	FZD5,ENSG00000163251.3,protein_coding,chr2:207762586-207769563	FZD5	1	-64	AGCTTCATTCCT	-	8.72249
chr2	207791715	207791865	nearest	22227	FZD5,ENSG00000163251.3,protein_coding,chr2:207762586-207769563	FZD5	1	53	GGGGGCATTCCA	-	8.69932
chr2	207791715	207791865	nearest	22227	FZD5,ENSG00000163251.3,protein_coding,chr2:207762586-207769563	FZD5	1	-42	GTCAGCATTCCA	-	9.34106
chr2	207791035	207791199	nearest	21554	FZD5,ENSG00000163251.3,protein_coding,chr2:207762586-207769563	FZD5	1	-23	GGCCACATTCCC	-	9.48589
chr2	207258548	207259001	nearest	91507	KLF7,ENSG00000118263.14,protein_coding,chr2:207074137-207167267	KLF7	1	-76	TGGAATGCTGCC	+	10.1334
chr2	206079720	206080415	nearest	-6236	INO80D,ENSG00000114933.15,protein_coding,chr2:205993721-206086303	INO80D	1	-132	TGGAATGCCGAA	+	8.64288
chr2	206004186	206004698	nearest	-81861	INO80D,ENSG00000114933.15,protein_coding,chr2:205993721-206086303	INO80D	1	39	AGGAATGCCACT	+	8.81632
chr2	205675996	205676214	nearest	-5885	NRP2,ENSG00000118257.16,protein_coding,chr2:205681990-205798133	NRP2	1	-80	CTTAGCATTCCT	-	8.20091
chr2	200626955	200627608	nearest	41413	AOX1,ENSG00000138356.13,protein_coding,chr2:200585868-200677064	AOX1	1	55	TGCCTCATTCCT	-	8.25352
chr2	197640645	197640836	nearest	-35305	RFTN2,ENSG00000162944.10,protein_coding,chr2:197568224-197676045	RFTN2	1	21	AGGAATGCTTAT	+	8.55239
chr2	195656597	195658320	nearest	81481	SLC39A10,ENSG00000196950.13,protein_coding,chr2:195575977-195737702	SLC39A10	1	-145	GTTTACATTCCC	-	8.20303
chr2	195656597	195658320	nearest	81481	SLC39A10,ENSG00000196950.13,protein_coding,chr2:195575977-195737702	SLC39A10	1	-712	ATGAACATTCCA	-	7.90033
chr2	195612671	195613128	nearest	36922	SLC39A10,ENSG00000196950.13,protein_coding,chr2:195575977-195737702	SLC39A10	1	91	GCAAGCATTCCT	-	8.83162
chr2	195612671	195613128	nearest	36922	SLC39A10,ENSG00000196950.13,protein_coding,chr2:195575977-195737702	SLC39A10	1	-206	AACTAAATTCCA	-	8.08996
chr2	189179634	189179906	nearest	-109	COL5A2,ENSG00000204262.11,protein_coding,chr2:189031896-189179879	COL5A2	1	26	AAGAATGCTGCC	+	8.9269
chr2	189143106	189143466	nearest	-36593	COL5A2,ENSG00000204262.11,protein_coding,chr2:189031896-189179879	COL5A2	1	-5	AGGAATGCCTTT	+	8.29027
chr2	188949138	188949420	nearest	-25041	COL3A1,ENSG00000168542.12,protein_coding,chr2:188974320-189012746	COL3A1	1	-126	GGGAATGTTGCG	+	8.977
chr2	188949138	188949420	nearest	-25041	COL3A1,ENSG00000168542.12,protein_coding,chr2:188974320-189012746	COL3A1	1	83	GTCTGAATTCCA	-	8.35874
chr2	182522558	182522778	nearest	-524	PDE1A,ENSG00000115252.18,protein_coding,chr2:182140036-182523192	PDE1A	1	71	ATCAGAATTCCT	-	7.92493
chr2	182522371	182522521	nearest	-746	PDE1A,ENSG00000115252.18,protein_coding,chr2:182140036-182523192	PDE1A	1	-11	ACAAGCATTCCT	-	8.54703
chr2	157704704	157704892	nearest	75793	ACVR1C,ENSG00000123612.15,protein_coding,chr2:157526767-157629005	ACVR1C	1	-28	TGGAATGCTCAA	+	8.00279
chr2	157566250	157566962	nearest	-62399	ACVR1C,ENSG00000123612.15,protein_coding,chr2:157526767-157629005	ACVR1C	1	-261	GGGAATGTGGAG	+	8.1889
chr2	144474091	144474250	nearest	-50413	ZEB2,ENSG00000169554.16,protein_coding,chr2:144384081-144524583	ZEB2	1	70	GCAGACATTCCA	-	8.00817
chr2	133546774	133546961	nearest	-21596	NCKAP5,ENSG00000176771.15,protein_coding,chr2:132671799-133568463	NCKAP5	1	-64	TGGAATGCTTGG	+	8.01957
chr2	131153833	131154418	nearest	49278	PLEKHB2,ENSG00000115762.16,protein_coding,chr2:131104847-131353709	PLEKHB2	1	58	AGGAATGTTCCG	+	8.78
chr2	131128932	131129165	nearest	24201	PLEKHB2,ENSG00000115762.16,protein_coding,chr2:131104847-131353709	PLEKHB2	1	-26	AACTGCATTCCT	-	9.95536
chr2	127859537	127860039	nearest	1631	POLR2D,ENSG00000144231.10,protein_coding,chr2:127843551-127858157	POLR2D	1	-210	CACTGCATTCCA	-	9.42789
chr2	119407805	119408017	nearest	-21990	TMEM37,ENSG00000171227.6,protein_coding,chr2:119429901-119438520	TMEM37	1	-9	TGGAATGTGTTG	+	8.04499
chr2	112138273	112138423	nearest	-37	FBLN7,ENSG00000144152.12,protein_coding,chr2:112138385-112188216	FBLN7	1	9	GGGCGCATTCCC	-	8.56787
chr2	111032689	111032913	nearest	-86577	BCL2L11,ENSG00000153094.21,protein_coding,chr2:111119378-111168447	BCL2L11	1	61	AGGAATGTGTGG	+	8.21216
chr2	110741615	110741992	nearest	9230	ACOXL,ENSG00000153093.18,protein_coding,chr2:110732573-111118222	ACOXL	1	-38	AGGAATTTGGTT	+	7.94499
chr2	106119460	106119657	nearest	56312	C2orf40,ENSG00000119147.9,protein_coding,chr2:106063246-106078159	C2orf40	1	-45	GCAGGCATTCCA	-	8.12723
chr2	86396529	86396738	nearest	-44014	KDM3A,ENSG00000115548.16,protein_coding,chr2:86440647-86492716	KDM3A	1	31	TGCTGAATTCCA	-	8.84989
chr2	77521765	77522466	nearest	-71204	LRRTM4,ENSG00000176204.13,protein_coding,chr2:76747719-77593319	LRRTM4	1	3	CCTGGCATTCCT	-	7.79856
chr2	74881274	74881515	nearest	47413	HK2,ENSG00000159399.9,protein_coding,chr2:74833981-74893359	HK2	1	26	AGGAATGCAGTG	+	9.73529
chr2	74778437	74778915	nearest	-55305	HK2,ENSG00000159399.9,protein_coding,chr2:74833981-74893359	HK2	1	-127	AGGAATGCAGAG	+	9.60042
chr2	74777004	74777687	nearest	-56636	HK2,ENSG00000159399.9,protein_coding,chr2:74833981-74893359	HK2	1	26	GGATTCATTCCT	-	8.1956
chr2	74227722	74228089	nearest	29343	MTHFD2,ENSG00000065911.11,protein_coding,chr2:74198562-74217565	MTHFD2	1	-144	TGGAATGTTGAC	+	9.222
chr2	74209563	74209853	nearest	11146	MTHFD2,ENSG00000065911.11,protein_coding,chr2:74198562-74217565	MTHFD2	1	54	GTGCACATTCCT	-	8.49656
chr2	74192404	74192763	nearest	-5979	MTHFD2,ENSG00000065911.11,protein_coding,chr2:74198562-74217565	MTHFD2	1	0	GGCTGCATTCTT	-	9.38351
chr2	70360486	70361356	nearest	58831	FAM136A,ENSG00000035141.7,protein_coding,chr2:70295975-70302090	FAM136A	1	-92	TGGAATGCCAGC	+	7.99581
chr2	70360486	70361356	nearest	58831	FAM136A,ENSG00000035141.7,protein_coding,chr2:70295975-70302090	FAM136A	1	287	TGGAATGTGCCT	+	8.69691
chr2	70341216	70341552	nearest	39294	FAM136A,ENSG00000035141.7,protein_coding,chr2:70295975-70302090	FAM136A	1	63	AGGAATTTGGGT	+	7.80476
chr2	69306760	69307673	nearest	-80038	GFPT1,ENSG00000198380.12,protein_coding,chr2:69319769-69387254	GFPT1	1	164	CCCCACATTCCA	-	8.71624
chr2	66509421	66509869	nearest	76193	MEIS1,ENSG00000143995.19,protein_coding,chr2:66433452-66573869	MEIS1	1	59	TGGAATGCAGAA	+	9.49649
chr2	66508425	66508872	nearest	75196	MEIS1,ENSG00000143995.19,protein_coding,chr2:66433452-66573869	MEIS1	1	-119	TAGAATGTTGCA	+	8.19925
chr2	66434158	66434484	nearest	869	MEIS1,ENSG00000143995.19,protein_coding,chr2:66433452-66573869	MEIS1	1	59	GGGCACATTCCC	-	8.44881
chr2	66433329	66433762	nearest	93	MEIS1,ENSG00000143995.19,protein_coding,chr2:66433452-66573869	MEIS1	1	-109	GTTCGCATTCCC	-	7.86972
chr2	63888897	63889047	nearest	48032	UGP2,ENSG00000169764.14,protein_coding,chr2:63840940-63891562	UGP2	1	39	TAGAATGCAGAT	+	7.99918
chr2	63847453	63847972	nearest	6772	UGP2,ENSG00000169764.14,protein_coding,chr2:63840940-63891562	UGP2	1	65	TGGAATGTCATC	+	8.01698
chr2	60629883	60630423	nearest	76586	BCL11A,ENSG00000119866.20,protein_coding,chr2:60451167-60553567	BCL11A	1	72	AAGAATGCAATC	+	7.78314
chr2	60550197	60551018	nearest	-2960	BCL11A,ENSG00000119866.20,protein_coding,chr2:60451167-60553567	BCL11A	1	-233	GGGAATTCTGCC	+	8.16177
chr2	54773914	54774305	nearest	50610	EML6,ENSG00000214595.11,protein_coding,chr2:54723499-54972025	EML6	1	-91	GTCTGCATTCCA	-	9.79768
chr2	54665459	54665953	nearest	-57793	EML6,ENSG00000214595.11,protein_coding,chr2:54723499-54972025	EML6	1	155	GGGAATGTGGTA	+	8.52723
chr2	47782787	47784262	nearest	87994	MSH6,ENSG00000116062.14,protein_coding,chr2:47695530-47810101	MSH6	1	401	AGGAATGCCTGC	+	8.43463
chr2	47685338	47685706	nearest	-10008	MSH6,ENSG00000116062.14,protein_coding,chr2:47695530-47810101	MSH6	1	-69	CCCTGCATTCCA	-	9.28767
chr2	47664891	47665072	nearest	-30549	MSH6,ENSG00000116062.14,protein_coding,chr2:47695530-47810101	MSH6	1	-37	ATTAGCATTCCA	-	8.11357
chr2	31333618	31333878	nearest	-80967	XDH,ENSG00000158125.9,protein_coding,chr2:31334321-31414715	XDH	1	61	GACTGCATTCCT	-	10.2399
chr2	30888801	30889394	nearest	68555	CAPN13,ENSG00000162949.16,protein_coding,chr2:30722771-30820542	CAPN13	1	20	TGATTCATTCCT	-	7.89441
chr2	30886096	30886405	nearest	65708	CAPN13,ENSG00000162949.16,protein_coding,chr2:30722771-30820542	CAPN13	1	113	GCCTGAATTCCA	-	8.35338
chr2	30862133	30862434	nearest	41741	CAPN13,ENSG00000162949.16,protein_coding,chr2:30722771-30820542	CAPN13	1	93	TGGAATGCAGTG	+	9.42789
chr2	30289174	30289572	nearest	57842	LBH,ENSG00000213626.11,protein_coding,chr2:30231531-30323730	LBH	1	-169	AGGAATGTAGAG	+	9.48137
chr2	30251844	30252313	nearest	20547	LBH,ENSG00000213626.11,protein_coding,chr2:30231531-30323730	LBH	1	-42	GGCTTCATTCCA	-	8.69968
chr2	30234129	30234516	nearest	2791	LBH,ENSG00000213626.11,protein_coding,chr2:30231531-30323730	LBH	1	29	AGGAATGTGAAA	+	8.28956
chr2	26784896	26785091	nearest	20704	CENPA,ENSG00000115163.14,protein_coding,chr2:26764289-26801067	CENPA	1	61	AAGAATGCCGCT	+	8.24531
chr2	26762165	26762478	nearest	-1963	SLC35F6,ENSG00000213699.8,protein_coding,chr2:26764284-26781231	SLC35F6	1	131	GCCCAAATTCCT	-	8.08935
chr2	26757872	26758347	nearest	-6175	SLC35F6,ENSG00000213699.8,protein_coding,chr2:26764284-26781231	SLC35F6	1	110	GGGAATGCAGCC	+	10.0573
chr2	26757872	26758347	nearest	-6175	SLC35F6,ENSG00000213699.8,protein_coding,chr2:26764284-26781231	SLC35F6	1	221	TTCAGAATTCCT	-	7.90834
chr2	26756425	26756716	nearest	-7714	SLC35F6,ENSG00000213699.8,protein_coding,chr2:26764284-26781231	SLC35F6	1	79	AGGAATGCAGAA	+	9.80389
chr2	25692138	25692631	nearest	18737	DTNB,ENSG00000138101.18,protein_coding,chr2:25377198-25673647	DTNB	1	-46	TGCAGAATTCCT	-	8.70067
chr2	25643581	25644031	nearest	-29841	DTNB,ENSG00000138101.18,protein_coding,chr2:25377198-25673647	DTNB	1	29	GGCTGCATTCCT	-	10.8974
chr2	25376593	25377415	nearest	34414	DNMT3A,ENSG00000119772.16,protein_coding,chr2:25227855-25342590	DNMT3A	1	281	AGGTGAATTCCT	-	8.1368
chr2	25315030	25315344	nearest	-27403	DNMT3A,ENSG00000119772.16,protein_coding,chr2:25227855-25342590	DNMT3A	1	110	GGGTGCATTCTT	-	8.34642
chr2	25309410	25309628	nearest	-33071	DNMT3A,ENSG00000119772.16,protein_coding,chr2:25227855-25342590	DNMT3A	1	107	AGCCTCATTCCA	-	7.96272
chr2	25039173	25039526	nearest	-2781	EFR3B,ENSG00000084710.13,protein_coding,chr2:25042130-25159137	EFR3B	1	7	AGGAATGCTGAC	+	9.64846
chr2	25018688	25019031	nearest	-23271	EFR3B,ENSG00000084710.13,protein_coding,chr2:25042130-25159137	EFR3B	1	107	TTACACATTCCA	-	8.11358
chr2	25018688	25019031	nearest	-23271	EFR3B,ENSG00000084710.13,protein_coding,chr2:25042130-25159137	EFR3B	1	90	ATACACATTCCA	-	8.13018
chr2	24975590	24975787	nearest	3594	DNAJC27,ENSG00000115137.11,protein_coding,chr2:24943636-24972094	DNAJC27	1	-35	CGCCAAATTCCT	-	8.3824
chr2	24957946	24958537	nearest	-13853	DNAJC27,ENSG00000115137.11,protein_coding,chr2:24943636-24972094	DNAJC27	1	-219	AAGAATGTATCT	+	8.16838
chr2	17543996	17544153	nearest	4948	VSNL1,ENSG00000163032.11,protein_coding,chr2:17539126-17657018	VSNL1	1	11	TGGAATGCAAGG	+	8.34477
chr2	10057277	10058282	nearest	14930	KLF11,ENSG00000172059.10,protein_coding,chr2:10042849-10054836	KLF11	1	120	AGGAACATTCCA	-	8.69266
chr2	10042666	10044387	nearest	677	KLF11,ENSG00000172059.10,protein_coding,chr2:10042849-10054836	KLF11	1	-578	AGGAATGTCACC	+	8.98185
chr2	10042666	10044387	nearest	677	KLF11,ENSG00000172059.10,protein_coding,chr2:10042849-10054836	KLF11	1	-521	GGACGCATTCCT	-	9.63357
chr19	58466617	58467607	nearest	67	ZNF324,ENSG00000083812.11,protein_coding,chr19:58467045-58475436	ZNF324	1	-297	TGGAATGCCGAA	+	8.64288
chr19	57804858	57805206	nearest	-9881	ZNF552,ENSG00000178935.5,protein_coding,chr19:57803841-57814913	ZNF552	1	122	TGGAATGCTGAG	+	8.83641
chr19	57799119	57799544	nearest	-15582	ZNF552,ENSG00000178935.5,protein_coding,chr19:57803841-57814913	ZNF552	1	111	TGGAATGCTGAG	+	8.83641
chr19	57279777	57280845	nearest	260	ZNF460,ENSG00000197714.8,protein_coding,chr19:57280051-57293569	ZNF460	1	491	CGCGGCATTCCC	-	8.69906
chr19	55745826	55746359	nearest	7690	NLRP9,ENSG00000185792.9,protein_coding,chr19:55708432-55738402	NLRP9	1	217	AGGAATGTCTGT	+	8.03098
chr19	55745826	55746359	nearest	7690	NLRP9,ENSG00000185792.9,protein_coding,chr19:55708432-55738402	NLRP9	1	146	GAGAACATTCCT	-	8.62718
chr19	54893059	54893941	nearest	-12650	NCR1,ENSG00000189430.12,protein_coding,chr19:54906150-54916140	NCR1	1	57	AGGAATGCGGAG	+	9.14805
chr19	53838604	53839906	nearest	14861	NLRP12,ENSG00000142405.21,protein_coding,chr19:53793603-53824394	NLRP12	1	-112	TGGAATGTCTCG	+	8.30122
chr19	53808755	53808965	nearest	-15534	NLRP12,ENSG00000142405.21,protein_coding,chr19:53793603-53824394	NLRP12	1	-11	TGCAGCATTCCC	-	9.29952
chr19	53792837	53793328	nearest	-31312	NLRP12,ENSG00000142405.21,protein_coding,chr19:53793603-53824394	NLRP12	1	7	GCATGCATTCCT	-	9.28824
chr19	53792837	53793328	nearest	-31312	NLRP12,ENSG00000142405.21,protein_coding,chr19:53793603-53824394	NLRP12	1	-17	CTGTGCATTCCT	-	8.56334
chr19	53771220	53771443	nearest	-53063	NLRP12,ENSG00000142405.21,protein_coding,chr19:53793603-53824394	NLRP12	1	67	TGGAATGCAGGG	+	9.28767
chr19	53769003	53769488	nearest	-55149	NLRP12,ENSG00000142405.21,protein_coding,chr19:53793603-53824394	NLRP12	1	-226	ACAAACATTCCA	-	8.12057
chr19	53394639	53395386	nearest	5219	ZNF765,ENSG00000196417.12,protein_coding,chr19:53389793-53430413	ZNF765	1	-122	TTTTACATTCCA	-	8.43453
chr19	53183559	53183811	nearest	-9701	ZNF665,ENSG00000197497.10,protein_coding,chr19:53159213-53193386	ZNF665	1	-40	TGGAATGCTGAA	+	9.03988
chr19	52569660	52570751	nearest	14383	ZNF701,ENSG00000167562.11,protein_coding,chr19:52555822-52587174	ZNF701	1	-412	GGCCGCATTCCT	-	10.445
chr19	52558747	52559541	nearest	3322	ZNF701,ENSG00000167562.11,protein_coding,chr19:52555822-52587174	ZNF701	1	64	TGGAATGTCTCG	+	8.30122
chr19	52343451	52343895	nearest	7428	ZNF610,ENSG00000167554.14,protein_coding,chr19:52336245-52367778	ZNF610	1	47	CCATACATTCCC	-	7.82443
chr19	52269151	52270166	nearest	87	ZNF766,ENSG00000196214.10,protein_coding,chr19:52269571-52296046	ZNF766	1	-381	GTTTGCATTCCT	-	9.16218
chr19	52176493	52177106	nearest	5156	ZNF836,ENSG00000196267.12,protein_coding,chr19:52153864-52171643	ZNF836	1	8	AAGAATGCAGTC	+	8.72604
chr19	52043609	52043840	nearest	13484	ZNF614,ENSG00000142556.18,protein_coding,chr19:52012765-52030240	ZNF614	1	-75	TGGAATGTCTCG	+	8.30122
chr19	52026426	52026999	nearest	-3528	ZNF614,ENSG00000142556.18,protein_coding,chr19:52012765-52030240	ZNF614	1	10	TGGAATGTCTCC	+	8.80588
chr19	51980977	51981305	nearest	-5715	ZNF350,ENSG00000256683.6,protein_coding,chr19:51964343-51986856	ZNF350	1	62	GAGAATGCAGTC	+	7.88595
chr19	51975910	51976250	nearest	-10776	ZNF350,ENSG00000256683.6,protein_coding,chr19:51964343-51986856	ZNF350	1	-21	GAGAATGCAGTC	+	7.88595
chr19	51975910	51976250	nearest	-10776	ZNF350,ENSG00000256683.6,protein_coding,chr19:51964343-51986856	ZNF350	1	40	GAGAATGCAGTC	+	7.88595
chr19	51975910	51976250	nearest	-10776	ZNF350,ENSG00000256683.6,protein_coding,chr19:51964343-51986856	ZNF350	1	101	GAGAATGCAGTC	+	7.88595
chr19	51975910	51976250	nearest	-10776	ZNF350,ENSG00000256683.6,protein_coding,chr19:51964343-51986856	ZNF350	1	-154	CTCAGCATTCCA	-	8.83641
chr19	51960548	51960874	nearest	-26145	ZNF350,ENSG00000256683.6,protein_coding,chr19:51964343-51986856	ZNF350	1	9	TGAGACATTCCA	-	8.50469
chr19	51948985	51949420	nearest	-37654	ZNF350,ENSG00000256683.6,protein_coding,chr19:51964343-51986856	ZNF350	1	-53	AGGAATTCTGTC	+	8.34439
chr19	51907136	51907556	nearest	2306	ZNF649,ENSG00000198093.10,protein_coding,chr19:51889224-51905040	ZNF649	1	-154	CACTGAATTCCT	-	8.29636
chr19	51905758	51906590	nearest	1134	ZNF649,ENSG00000198093.10,protein_coding,chr19:51889224-51905040	ZNF649	1	35	TGGAATGTCTCG	+	8.30122
chr19	51887533	51888409	nearest	-2979	ZNF577,ENSG00000161551.12,protein_coding,chr19:51855802-51890950	ZNF577	1	-157	TGAAACATTCCC	-	8.36898
chr19	51016762	51017215	nearest	-3187	KLK10,ENSG00000129451.11,protein_coding,chr19:51012739-51020175	KLK10	1	-161	TTCTAAATTCCT	-	8.24589
chr19	50147902	50148465	nearest	-15012	IZUMO2,ENSG00000161652.12,protein_coding,chr19:50152548-50163195	IZUMO2	1	164	GGGAATGCTGGG	+	8.29835
chr19	50142010	50142183	nearest	-21099	IZUMO2,ENSG00000161652.12,protein_coding,chr19:50152548-50163195	IZUMO2	1	-67	TTTAGCATTCCA	-	8.09698
chr19	50098823	50099521	nearest	-64023	IZUMO2,ENSG00000161652.12,protein_coding,chr19:50152548-50163195	IZUMO2	1	41	AGGAATGTGCAG	+	7.99191
chr19	49876474	49878322	nearest	-27	TBC1D17,ENSG00000104946.10,protein_coding,chr19:49877425-49888749	TBC1D17	1	368	GGACGCATTCCC	-	8.79348
chr19	48888176	48888517	nearest	-10387	TULP2,ENSG00000104804.7,protein_coding,chr19:48880965-48898733	TULP2	1	122	ACACGCATTCCA	-	8.24388
chr19	48634462	48634809	nearest	-2803	DBP,ENSG00000105516.10,protein_coding,chr19:48630030-48637438	DBP	1	70	AGGAATGTGCCG	+	8.78425
chr19	48629711	48630491	nearest	-7337	DBP,ENSG00000105516.10,protein_coding,chr19:48630030-48637438	DBP	1	28	TGGAATGTACTG	+	8.27175
chr19	48629711	48630491	nearest	-7337	DBP,ENSG00000105516.10,protein_coding,chr19:48630030-48637438	DBP	1	299	CGCTTCATTCCT	-	8.50242
chr19	48629711	48630491	nearest	-7337	DBP,ENSG00000105516.10,protein_coding,chr19:48630030-48637438	DBP	1	-284	GCCTACATTCCA	-	9.67326
chr19	48363043	48364585	nearest	-423	TMEM143,ENSG00000161558.10,protein_coding,chr19:48332356-48364237	TMEM143	1	-681	TCCTGCATTCCA	-	9.49113
chr19	47402615	47402859	nearest	-16786	MEIS3,ENSG00000105419.17,protein_coding,chr19:47403124-47419523	MEIS3	1	28	AGGAATTCTGCA	+	8.70067
chr19	45059402	45059759	nearest	-17008	ZNF296,ENSG00000170684.8,protein_coding,chr19:45071500-45076588	ZNF296	1	92	GGCTTCATTCCC	-	8.16698
chr19	44920876	44921043	nearest	6712	APOC1,ENSG00000130208.9,protein_coding,chr19:44914247-44919349	APOC1	1	63	TGGAATGTAACG	+	9.02341
chr19	42066046	42066334	nearest	-2287	ZNF574,ENSG00000105732.11,protein_coding,chr19:42068477-42081565	ZNF574	1	-51	GAGTGAATTCCT	-	7.76392
chr19	38434289	38435030	nearest	960	RYR1,ENSG00000196218.11,protein_coding,chr19:38433699-38587564	RYR1	1	223	CACAGCATTCCT	-	9.27868
chr19	38261910	38262227	nearest	5477	PPP1R14A,ENSG00000167641.10,protein_coding,chr19:38251237-38256591	PPP1R14A	1	37	AGGAATGTTGAT	+	9.24481
chr19	38261910	38262227	nearest	5477	PPP1R14A,ENSG00000167641.10,protein_coding,chr19:38251237-38256591	PPP1R14A	1	52	TGGAATGTTTCT	+	8.91827
chr19	38261910	38262227	nearest	5477	PPP1R14A,ENSG00000167641.10,protein_coding,chr19:38251237-38256591	PPP1R14A	1	30	ACAAACATTCCA	-	8.12057
chr19	38162310	38162460	nearest	-67329	DPF1,ENSG00000011332.19,protein_coding,chr19:38211006-38229714	DPF1	1	-17	ACAGGCATTCCA	-	7.84264
chr19	37635567	37635852	nearest	40919	ZNF571,ENSG00000180479.13,protein_coding,chr19:37554782-37594790	ZNF571	1	-71	GACCACATTCCT	-	9.66852
chr19	37594207	37595362	nearest	-6	ZNF571,ENSG00000180479.13,protein_coding,chr19:37554782-37594790	ZNF571	1	407	TGACGCATTCTT	-	7.81848
chr19	37578418	37578830	nearest	-16166	ZNF571,ENSG00000180479.13,protein_coding,chr19:37554782-37594790	ZNF571	1	95	CTCCACATTCCC	-	8.1889
chr19	37529906	37530721	nearest	-21093	ZNF540,ENSG00000171817.16,protein_coding,chr19:37551406-37614097	ZNF540	1	1	AGAGGCATTCCT	-	8.94774
chr19	37529906	37530721	nearest	-21093	ZNF540,ENSG00000171817.16,protein_coding,chr19:37551406-37614097	ZNF540	1	-62	CGAGACATTCCA	-	8.30122
chr19	37362636	37363080	nearest	-8203	ZNF527,ENSG00000189164.14,protein_coding,chr19:37371061-37393066	ZNF527	1	-153	GGGAATGTGGGC	+	8.68819
chr19	37362636	37363080	nearest	-8203	ZNF527,ENSG00000189164.14,protein_coding,chr19:37371061-37393066	ZNF527	1	15	AGGAATGTGGGC	+	9.52829
chr19	37362636	37363080	nearest	-8203	ZNF527,ENSG00000189164.14,protein_coding,chr19:37371061-37393066	ZNF527	1	99	GGGAATGTGGGC	+	8.68819
chr19	36233250	36234217	nearest	-12524	ZNF565,ENSG00000196357.11,protein_coding,chr19:36182060-36246257	ZNF565	1	83	GGAGACATTCCA	-	8.80588
chr19	36041891	36042160	nearest	8682	CLIP3,ENSG00000105270.14,protein_coding,chr19:36014660-36033343	CLIP3	1	29	TACTGCATTCCA	-	9.63136
chr19	35869378	35870493	nearest	648	NPHS1,ENSG00000161270.19,protein_coding,chr19:35825964-35869287	NPHS1	1	79	TGGAATTTAGGA	+	7.93313
chr19	23146359	23146557	nearest	71248	ZNF730,ENSG00000183850.13,protein_coding,chr19:23075210-23147219	ZNF730	1	-51	AAGAATGTGGCA	+	8.51089
chr19	23146359	23146557	nearest	71248	ZNF730,ENSG00000183850.13,protein_coding,chr19:23075210-23147219	ZNF730	1	33	AAGAATGTGGTA	+	7.85342
chr19	21699236	21699799	nearest	-68111	ZNF100,ENSG00000197020.10,protein_coding,chr19:21722766-21767628	ZNF100	1	-209	AGGTGAATTCCT	-	8.1368
chr19	21697746	21697928	nearest	-69791	ZNF100,ENSG00000197020.10,protein_coding,chr19:21722766-21767628	ZNF100	1	-23	AAGTGCATTCCT	-	8.91827
chr19	20261425	20261778	nearest	94373	ZNF486,ENSG00000256229.7,protein_coding,chr19:20167228-20200490	ZNF486	1	94	TGGAATGTCATC	+	8.01698
chr19	20237394	20237605	nearest	70271	ZNF486,ENSG00000256229.7,protein_coding,chr19:20167228-20200490	ZNF486	1	34	TGGAATGCAGTG	+	9.42789
chr19	20145299	20145868	nearest	-21645	ZNF486,ENSG00000256229.7,protein_coding,chr19:20167228-20200490	ZNF486	1	51	TGGAATGCAATG	+	8.48499
chr19	20103052	20103397	nearest	25230	ZNF90,ENSG00000213988.9,protein_coding,chr19:20077994-20127076	ZNF90	1	131	AGACACATTCCA	-	8.92252
chr19	20082405	20083248	nearest	4832	ZNF90,ENSG00000213988.9,protein_coding,chr19:20077994-20127076	ZNF90	1	26	TGGAATGTCTCA	+	8.50469
chr19	20059468	20060028	nearest	-18246	ZNF90,ENSG00000213988.9,protein_coding,chr19:20077994-20127076	ZNF90	1	-7	GATGACATTCCA	-	8.01698
chr19	19053902	19054058	nearest	-10019	SLC25A42,ENSG00000181035.13,protein_coding,chr19:19063999-19112888	SLC25A42	1	-27	GGGCACATTCTT	-	7.77499
chr19	18029128	18029543	nearest	28203	ARRDC2,ENSG00000105643.9,protein_coding,chr19:18001132-18014102	ARRDC2	1	192	TGCTGCATTCCA	-	10.2888
chr19	18029128	18029543	nearest	28203	ARRDC2,ENSG00000105643.9,protein_coding,chr19:18001132-18014102	ARRDC2	1	-98	CACTGCATTCCA	-	9.42789
chr19	18021974	18022715	nearest	21212	ARRDC2,ENSG00000105643.9,protein_coding,chr19:18001132-18014102	ARRDC2	1	-353	TGGAATGCAGTG	+	9.42789
chr19	17979244	17979753	nearest	-21634	ARRDC2,ENSG00000105643.9,protein_coding,chr19:18001132-18014102	ARRDC2	1	62	GGCTGCATTCCT	-	10.8974
chr19	17889694	17889905	nearest	17826	SLC5A5,ENSG00000105641.3,protein_coding,chr19:17871973-17895174	SLC5A5	1	67	TTCTAAATTCCA	-	7.93849
chr19	17883398	17884291	nearest	11871	SLC5A5,ENSG00000105641.3,protein_coding,chr19:17871973-17895174	SLC5A5	1	-108	GGGAATGTTCCT	+	8.15997
chr19	17883398	17884291	nearest	11871	SLC5A5,ENSG00000105641.3,protein_coding,chr19:17871973-17895174	SLC5A5	1	314	AAATGCATTCCT	-	9.14388
chr19	17647525	17648578	nearest	-40314	UNC13A,ENSG00000130477.14,protein_coding,chr19:17601328-17688365	UNC13A	1	-103	CTCCACATTCCT	-	9.029
chr19	17292303	17293055	nearest	70	MRPL34,ENSG00000130312.6,protein_coding,chr19:17292609-17306843	MRPL34	1	132	AGGAATGCCAGG	+	7.79856
chr19	15222702	15223844	nearest	-10162	EPHX3,ENSG00000105131.7,protein_coding,chr19:15226919-15233435	EPHX3	1	-420	AGTAACATTCCA	-	8.78685
chr19	12365195	12366129	nearest	-243	ZNF442,ENSG00000198342.9,protein_coding,chr19:12345949-12365905	ZNF442	1	438	AGGAATTTAGGA	+	8.24053
chr19	12294361	12295364	nearest	-25	ZNF44,ENSG00000197857.13,protein_coding,chr19:12224686-12294887	ZNF44	1	421	AGGAATTTGGGA	+	7.78816
chr19	12052580	12053247	nearest	-26	ZNF878,ENSG00000257446.3,protein_coding,chr19:12043805-12052939	ZNF878	1	57	GGGAATGCAACC	+	9.11442
chr19	11565578	11565825	nearest	6327	ZNF627,ENSG00000198551.9,protein_coding,chr19:11559374-11619135	ZNF627	1	-104	TGGAATGCCGTG	+	8.57429
chr19	9913636	9914144	nearest	-22662	OLFM2,ENSG00000105088.8,protein_coding,chr19:9853718-9936552	OLFM2	1	170	GGTGGCATTCCC	-	8.26082
chr19	9913636	9914144	nearest	-22662	OLFM2,ENSG00000105088.8,protein_coding,chr19:9853718-9936552	OLFM2	1	137	GGTGGCATTCCC	-	8.26082
chr19	8260861	8261339	nearest	-47256	CD320,ENSG00000167775.10,protein_coding,chr19:8302127-8308356	CD320	1	-7	GGGAACATTCTT	-	7.77075
chr19	6718372	6719330	nearest	-11711	C3,ENSG00000125730.16,protein_coding,chr19:6677704-6730562	C3	1	-55	AGGAATTCAGTG	+	8.29636
chr19	6505582	6506270	nearest	3078	TUBB4A,ENSG00000104833.10,protein_coding,chr19:6494319-6502848	TUBB4A	1	9	GATGACATTCCA	-	8.01698
chr19	6476089	6476931	nearest	-6047	DENND1C,ENSG00000205744.9,protein_coding,chr19:6467207-6482557	DENND1C	1	-413	AGGAATTTGGCC	+	8.88705
chr19	4870082	4870627	nearest	2586	PLIN3,ENSG00000105355.8,protein_coding,chr19:4838341-4867768	PLIN3	1	-163	AACAGCATTCCA	-	9.19134
chr19	3868854	3869572	nearest	181	ZFR2,ENSG00000105278.10,protein_coding,chr19:3804024-3869032	ZFR2	1	95	CCCCACATTCCC	-	8.18354
chr18	58848581	58849128	nearest	-13746	ZNF532,ENSG00000074657.13,protein_coding,chr18:58862600-58986480	ZNF532	1	155	AGGAATGTTGCT	+	10.0372
chr18	58846312	58846636	nearest	-16126	ZNF532,ENSG00000074657.13,protein_coding,chr18:58862600-58986480	ZNF532	1	77	AGGAATTTTGCA	+	8.58161
chr18	58838180	58838747	nearest	-24137	ZNF532,ENSG00000074657.13,protein_coding,chr18:58862600-58986480	ZNF532	1	-155	GTGTACATTCCA	-	8.64153
chr18	58788495	58788728	nearest	-73989	ZNF532,ENSG00000074657.13,protein_coding,chr18:58862600-58986480	ZNF532	1	89	AAGAATGCAACA	+	8.13942
chr18	46919229	46919487	nearest	-802	PIAS2,ENSG00000078043.15,protein_coding,chr18:46803224-46920160	PIAS2	1	3	TGGCGCATTCCT	-	9.10677
chr18	35231041	35231321	nearest	-9849	ZNF397,ENSG00000186812.12,protein_coding,chr18:35241030-35267133	ZNF397	1	66	TGGAATGCAGGG	+	9.28767
chr18	32010460	32010720	nearest	-7782	RNF125,ENSG00000101695.8,protein_coding,chr18:32018372-32073213	RNF125	1	-116	AGGAATGCTGAT	+	9.36387
chr18	32005870	32006323	nearest	-12276	RNF125,ENSG00000101695.8,protein_coding,chr18:32018372-32073213	RNF125	1	-37	GATGACATTCCA	-	8.01698
chr18	32000467	32000777	nearest	-17750	RNF125,ENSG00000101695.8,protein_coding,chr18:32018372-32073213	RNF125	1	-15	GATGACATTCCA	-	8.01698
chr18	11752267	11752774	nearest	63564	GNAL,ENSG00000141404.15,protein_coding,chr18:11688956-11885685	GNAL	1	-119	GCGCACATTCCT	-	8.4912
chr17	81663096	81663601	nearest	236	PDE6G,ENSG00000185527.11,protein_coding,chr17:81650459-81663112	PDE6G	1	-240	AGGAATTCATTC	+	7.98953
chr17	80491907	80492061	nearest	14141	NPTX1,ENSG00000171246.5,protein_coding,chr17:80467148-80477843	NPTX1	1	-33	GTGGGCATTCCA	-	7.90699
chr17	80023489	80023644	nearest	-12282	TBC1D16,ENSG00000167291.15,protein_coding,chr17:79932343-80035848	TBC1D16	1	52	CCAGGCATTCCT	-	7.92998
chr17	68627880	68628333	nearest	26717	FAM20A,ENSG00000108950.11,protein_coding,chr17:68535113-68601389	FAM20A	1	189	TACTGAATTCCA	-	8.19242
chr17	68613823	68614283	nearest	12664	FAM20A,ENSG00000108950.11,protein_coding,chr17:68535113-68601389	FAM20A	1	127	AGGAATGTCTAG	+	7.81628
chr17	67424324	67425400	nearest	47581	PITPNC1,ENSG00000154217.14,protein_coding,chr17:67377281-67697261	PITPNC1	1	207	CAAAACATTCCT	-	8.34814
chr17	67424324	67425400	nearest	47581	PITPNC1,ENSG00000154217.14,protein_coding,chr17:67377281-67697261	PITPNC1	1	66	GATGACATTCCA	-	8.01698
chr17	62633632	62633973	nearest	6401	MRC2,ENSG00000011028.13,protein_coding,chr17:62627401-62693597	MRC2	1	8	CATTGCATTCCA	-	8.48499
chr17	60088162	60088588	nearest	9444	HEATR6,ENSG00000068097.14,protein_coding,chr17:60043194-60078931	HEATR6	1	-14	TGGAATGCAAGG	+	8.34477
chr17	59423212	59423649	nearest	91741	YPEL2,ENSG00000175155.8,protein_coding,chr17:59331689-59401729	YPEL2	1	-133	AAGAATGCTGAC	+	8.13456
chr17	59366411	59366689	nearest	34861	YPEL2,ENSG00000175155.8,protein_coding,chr17:59331689-59401729	YPEL2	1	32	AGGAATGTCTGT	+	8.03098
chr17	59366411	59366689	nearest	34861	YPEL2,ENSG00000175155.8,protein_coding,chr17:59331689-59401729	YPEL2	1	98	GTTTACATTCCT	-	9.04312
chr17	59316983	59317250	nearest	-14573	YPEL2,ENSG00000175155.8,protein_coding,chr17:59331689-59401729	YPEL2	1	13	TGGTGCATTCTT	-	8.04524
chr17	59308779	59309372	nearest	-22614	YPEL2,ENSG00000175155.8,protein_coding,chr17:59331689-59401729	YPEL2	1	70	CACTGCATTCCA	-	9.42789
chr17	48047752	48048890	nearest	-8	NFE2L1,ENSG00000082641.15,protein_coding,chr17:48048329-48061487	NFE2L1	1	161	GGGCACATTCCT	-	9.2889
chr17	46785780	46786182	nearest	-47173	WNT3,ENSG00000108379.9,protein_coding,chr17:46762506-46833154	WNT3	1	-95	TGGAATGTTGCA	+	9.71316
chr17	46771420	46772972	nearest	-60958	WNT3,ENSG00000108379.9,protein_coding,chr17:46762506-46833154	WNT3	1	747	CGTTAAATTCCT	-	7.89187
chr17	46763943	46764239	nearest	-69063	WNT3,ENSG00000108379.9,protein_coding,chr17:46762506-46833154	WNT3	1	103	TGGAATGTCACC	+	8.67445
chr17	43917329	43918024	nearest	7965	MPP2,ENSG00000108852.14,protein_coding,chr17:43875357-43909711	MPP2	1	-292	TGGAATGAAGCA	+	8.39849
chr17	19912868	19913210	nearest	45103	ULK2,ENSG00000083290.19,protein_coding,chr17:19770829-19867936	ULK2	1	-15	TGGAATGTAGTG	+	9.30884
chr17	19912868	19913210	nearest	45103	ULK2,ENSG00000083290.19,protein_coding,chr17:19770829-19867936	ULK2	1	-74	CTCCACATTCCT	-	9.029
chr17	19888555	19888902	nearest	20792	ULK2,ENSG00000083290.19,protein_coding,chr17:19770829-19867936	ULK2	1	28	TGGAATGTCATC	+	8.01698
chr17	19882170	19882915	nearest	14606	ULK2,ENSG00000083290.19,protein_coding,chr17:19770829-19867936	ULK2	1	-280	CACTGCATTCCA	-	9.42789
chr17	19507436	19508282	nearest	12474	SLC47A1,ENSG00000142494.13,protein_coding,chr17:19495385-19579034	SLC47A1	1	219	TGGAATTCAGGA	+	8.05219
chr17	19505103	19505452	nearest	9892	SLC47A1,ENSG00000142494.13,protein_coding,chr17:19495385-19579034	SLC47A1	1	129	CGAGACATTCCA	-	8.30122
chr17	19495125	19495640	nearest	-3	SLC47A1,ENSG00000142494.13,protein_coding,chr17:19495385-19579034	SLC47A1	1	243	GACTGCATTCCA	-	9.93255
chr17	19482646	19483549	nearest	-12288	SLC47A1,ENSG00000142494.13,protein_coding,chr17:19495385-19579034	SLC47A1	1	-316	TGGAATTCAGGC	+	8.35338
chr17	19482646	19483549	nearest	-12288	SLC47A1,ENSG00000142494.13,protein_coding,chr17:19495385-19579034	SLC47A1	1	143	TGGAATGCAGTG	+	9.42789
chr17	19470739	19471327	nearest	-24352	SLC47A1,ENSG00000142494.13,protein_coding,chr17:19495385-19579034	SLC47A1	1	-188	GGCTGAATTCCC	-	8.61839
chr17	19470739	19471327	nearest	-24352	SLC47A1,ENSG00000142494.13,protein_coding,chr17:19495385-19579034	SLC47A1	1	-225	TTCCGCATTCTT	-	7.83761
chr17	16217047	16217492	nearest	78	PIGL,ENSG00000108474.16,protein_coding,chr17:16217191-16351797	PIGL	1	-120	CCCAACATTCCC	-	8.17929
chr17	15966965	15967199	nearest	22165	ADORA2B,ENSG00000170425.3,protein_coding,chr17:15944917-15975746	ADORA2B	1	-101	AGGAATGTTTTG	+	8.34814
chr17	15881962	15882578	nearest	-62647	ADORA2B,ENSG00000170425.3,protein_coding,chr17:15944917-15975746	ADORA2B	1	83	TGCCAAATTCCT	-	8.58586
chr17	15864515	15864776	nearest	-80272	ADORA2B,ENSG00000170425.3,protein_coding,chr17:15944917-15975746	ADORA2B	1	-46	GGGAATGTGGGC	+	8.68819
chr17	15864515	15864776	nearest	-80272	ADORA2B,ENSG00000170425.3,protein_coding,chr17:15944917-15975746	ADORA2B	1	101	TTTAGCATTCCT	-	8.40437
chr17	15262465	15262974	nearest	-2607	PMP22,ENSG00000109099.13,protein_coding,chr17:15229777-15265326	PMP22	1	241	GGCTGGATTCCT	-	7.76448
chr17	11997046	11997897	nearest	-39	ZNF18,ENSG00000154957.13,protein_coding,chr17:11977439-11997510	ZNF18	1	-281	AGGAATGCAGAG	+	9.60042
chr17	11976508	11976676	nearest	-20918	ZNF18,ENSG00000154957.13,protein_coding,chr17:11977439-11997510	ZNF18	1	55	GACGACATTCCA	-	8.95988
chr17	11971180	11972034	nearest	-25903	ZNF18,ENSG00000154957.13,protein_coding,chr17:11977439-11997510	ZNF18	1	282	GATGACATTCCA	-	8.01698
chr17	11971180	11972034	nearest	-25903	ZNF18,ENSG00000154957.13,protein_coding,chr17:11977439-11997510	ZNF18	1	27	CACTGCATTCCA	-	9.42789
chr17	10772365	10772903	nearest	42318	TMEM220,ENSG00000187824.8,protein_coding,chr17:10699015-10730316	TMEM220	1	174	CACTGCATTCCA	-	9.42789
chr17	8029266	8029628	nearest	-9570	ALOX15B,ENSG00000179593.15,protein_coding,chr17:8039017-8049134	ALOX15B	1	-81	GGCCACATTCCT	-	10.326
chr17	6421974	6422529	nearest	-12948	AIPL1,ENSG00000129221.14,protein_coding,chr17:6393693-6435199	AIPL1	1	-209	AGCCTCATTCCA	-	7.96272
chr17	5155380	5155628	nearest	32388	ZNF232,ENSG00000167840.13,protein_coding,chr17:5105541-5123116	ZNF232	1	-30	TGGAATGCCATT	+	7.85145
chr17	2876623	2876796	nearest	99653	RAP1GAP2,ENSG00000132359.13,protein_coding,chr17:2777056-3037739	RAP1GAP2	1	25	GGCTGAATTCCA	-	9.15108
chr17	2871260	2871492	nearest	94320	RAP1GAP2,ENSG00000132359.13,protein_coding,chr17:2777056-3037739	RAP1GAP2	1	-39	AGATACATTCCA	-	9.37489
chr17	2835551	2835740	nearest	58589	RAP1GAP2,ENSG00000132359.13,protein_coding,chr17:2777056-3037739	RAP1GAP2	1	65	GGGTGCATTCCA	-	9.55293
chr17	2835551	2835740	nearest	58589	RAP1GAP2,ENSG00000132359.13,protein_coding,chr17:2777056-3037739	RAP1GAP2	1	49	CACTGCATTCCA	-	9.42789
chr17	2828439	2828835	nearest	51581	RAP1GAP2,ENSG00000132359.13,protein_coding,chr17:2777056-3037739	RAP1GAP2	1	-135	AAGAGCATTCCA	-	8.15425
chr17	2818878	2819187	nearest	41976	RAP1GAP2,ENSG00000132359.13,protein_coding,chr17:2777056-3037739	RAP1GAP2	1	33	TGGAATGCAGTG	+	9.42789
chr17	973137	973336	nearest	-6534	NXN,ENSG00000167693.16,protein_coding,chr17:799313-979770	NXN	1	9	CGCAGCATTCCA	-	9.62875
chr17	951347	951972	nearest	-28111	NXN,ENSG00000167693.16,protein_coding,chr17:799313-979770	NXN	1	78	GCCGGCATTCCT	-	9.24611
chr17	948491	948793	nearest	-31128	NXN,ENSG00000167693.16,protein_coding,chr17:799313-979770	NXN	1	-62	AGGAATGTTTAA	+	8.41674
chr17	948491	948793	nearest	-31128	NXN,ENSG00000167693.16,protein_coding,chr17:799313-979770	NXN	1	109	AGCAGCATTCTC	-	7.80221
chr16	75089562	75089861	nearest	-27060	LDHD,ENSG00000166816.13,protein_coding,chr16:75111860-75116771	LDHD	1	73	GGTGACATTCCC	-	8.14176
chr16	74833962	74834412	nearest	59356	FA2H,ENSG00000103089.8,protein_coding,chr16:74712955-74774831	FA2H	1	58	CACTGCATTCCA	-	9.42789
chr16	70621858	70622385	nearest	42226	IL34,ENSG00000157368.10,protein_coding,chr16:70579895-70660682	IL34	1	-196	TGGAATGTCATC	+	8.01698
chr16	70616592	70616833	nearest	36817	IL34,ENSG00000157368.10,protein_coding,chr16:70579895-70660682	IL34	1	77	TGGAATGTCATC	+	8.01698
chr16	70109603	70109887	nearest	-3881	PDPR,ENSG00000090857.13,protein_coding,chr16:70113626-70162537	PDPR	1	68	CACTGCATTCCA	-	9.42789
chr16	56702026	56702662	nearest	19920	MT1X,ENSG00000187193.8,protein_coding,chr16:56682424-56684196	MT1X	1	121	CACTGCATTCCA	-	9.42789
chr16	56691711	56692258	nearest	9560	MT1X,ENSG00000187193.8,protein_coding,chr16:56682424-56684196	MT1X	1	72	GGCAACATTCCT	-	10.3217
chr16	47167068	47167705	nearest	23389	NETO2,ENSG00000171208.9,protein_coding,chr16:47077703-47143997	NETO2	1	4	GATGACATTCCA	-	8.01698
chr16	30454638	30455382	nearest	8829	SEPHS2,ENSG00000179918.16,protein_coding,chr16:30443631-30446181	SEPHS2	1	-122	TGGAATGTCATC	+	8.01698
chr16	29729268	29729527	nearest	-16609	C16orf54,ENSG00000185905.3,protein_coding,chr16:29742463-29746006	C16orf54	1	-35	GGGAATGTCGGG	+	7.7823
chr16	21278022	21278652	nearest	-24746	CRYM,ENSG00000103316.10,protein_coding,chr16:21238874-21303083	CRYM	1	225	AGCCACATTCCT	-	10.0414
chr16	19948659	19949135	nearest	62730	GPRC5B,ENSG00000167191.11,protein_coding,chr16:19856691-19886167	GPRC5B	1	-48	AGGAATGCTGAA	+	9.34727
chr16	19948659	19949135	nearest	62730	GPRC5B,ENSG00000167191.11,protein_coding,chr16:19856691-19886167	GPRC5B	1	-143	TCATGCATTCCC	-	8.14696
chr16	19948659	19949135	nearest	62730	GPRC5B,ENSG00000167191.11,protein_coding,chr16:19856691-19886167	GPRC5B	1	-155	TGCAGCATTCTT	-	8.62571
chr16	19884796	19885429	nearest	-1055	GPRC5B,ENSG00000167191.11,protein_coding,chr16:19856691-19886167	GPRC5B	1	-9	GGGGACATTCCC	-	8.04757
chr16	4529208	4529399	nearest	-9525	CDIP1,ENSG00000089486.16,protein_coding,chr16:4510675-4538828	CDIP1	1	-67	TGGAATGTAATG	+	8.36594
chr16	3304829	3306016	nearest	16	ZNF75A,ENSG00000162086.14,protein_coding,chr16:3305406-3318852	ZNF75A	1	-409	GGGAATGCGTCA	+	8.49229
chr16	3100084	3100488	nearest	969	ZSCAN10,ENSG00000130182.7,protein_coding,chr16:3088890-3099317	ZSCAN10	1	-107	CTCTGCATTCCC	-	8.76033
chr16	2339832	2341367	nearest	-147	ABCA3,ENSG00000167972.13,protein_coding,chr16:2275881-2340746	ABCA3	1	659	TGGAATTCGGCC	+	8.69871
chr16	1952628	1953263	nearest	-4661	RPL3L,ENSG00000140986.7,protein_coding,chr16:1943974-1957606	RPL3L	1	219	GACAGCATTCCC	-	8.94324
chr15	77872058	77872258	nearest	51258	LINGO1,ENSG00000169783.12,protein_coding,chr15:77613027-77820900	LINGO1	1	-35	GGGAATGCAGGG	+	8.75497
chr15	74938588	74938871	nearest	561	COX5A,ENSG00000178741.11,protein_coding,chr15:74919791-74938168	COX5A	1	46	AAGAATGCCGCT	+	8.24531
chr15	70781198	70781644	nearest	17828	UACA,ENSG00000137831.14,protein_coding,chr15:70654554-70763593	UACA	1	-49	AGGAATGTTTCC	+	9.51026
chr15	70781198	70781644	nearest	17828	UACA,ENSG00000137831.14,protein_coding,chr15:70654554-70763593	UACA	1	-3	AGGCACATTCCA	-	8.69691
chr15	70779646	70780109	nearest	16284	UACA,ENSG00000137831.14,protein_coding,chr15:70654554-70763593	UACA	1	7	GATTGCATTCTT	-	7.78314
chr15	70744051	70744385	nearest	-19375	UACA,ENSG00000137831.14,protein_coding,chr15:70654554-70763593	UACA	1	0	CACTGCATTCCA	-	9.42789
chr15	70720415	70720608	nearest	-43082	UACA,ENSG00000137831.14,protein_coding,chr15:70654554-70763593	UACA	1	-22	AGGAATGTTTAT	+	8.43333
chr15	68077720	68077986	nearest	23674	PIAS1,ENSG00000033800.13,protein_coding,chr15:68054179-68198603	PIAS1	1	82	AGATGCATTCTT	-	8.28744
chr15	68017302	68017741	nearest	-36658	PIAS1,ENSG00000033800.13,protein_coding,chr15:68054179-68198603	PIAS1	1	-6	TTCAGCATTCCT	-	9.34727
chr15	67968027	67968465	nearest	-85933	PIAS1,ENSG00000033800.13,protein_coding,chr15:68054179-68198603	PIAS1	1	36	GGGAATGCAGCC	+	10.0573
chr15	67564078	67564605	nearest	21632	MAP2K5,ENSG00000137764.19,protein_coding,chr15:67542709-67807123	MAP2K5	1	232	CATTGCATTCCA	-	8.48499
chr15	64809970	64811456	nearest	-14955	PIF1,ENSG00000140451.12,protein_coding,chr15:64815632-64825668	PIF1	1	-359	GTAAACATTCCT	-	8.71792
chr15	61228919	61229619	nearest	-50	RORA,ENSG00000069667.15,protein_coding,chr15:60488284-61229319	RORA	1	267	ACCCACATTCCC	-	8.4036
chr15	57425078	57425576	nearest	49360	CGNL1,ENSG00000128849.10,protein_coding,chr15:57375967-57550727	CGNL1	1	6	CAGTGCATTCCC	-	7.85811
chr15	52548604	52548754	nearest	19629	MYO5A,ENSG00000197535.14,protein_coding,chr15:52307283-52529050	MYO5A	1	38	TGGAATGTATCT	+	9.37489
chr15	52528395	52529496	nearest	-105	MYO5A,ENSG00000197535.14,protein_coding,chr15:52307283-52529050	MYO5A	1	540	CCAAGCATTCCT	-	8.32697
chr15	48627410	48627560	nearest	-18364	FBN1,ENSG00000166147.13,protein_coding,chr15:48408306-48645849	FBN1	1	-3	TGGAATGTGTTA	+	8.24845
chr15	41263899	41264497	nearest	33359	CHP1,ENSG00000187446.11,protein_coding,chr15:41230839-41281890	CHP1	1	31	TGGAATGTAAGT	+	8.44577
chr15	41263899	41264497	nearest	33359	CHP1,ENSG00000187446.11,protein_coding,chr15:41230839-41281890	CHP1	1	159	TGGAATGCCACA	+	8.49232
chr15	40886582	40887251	nearest	-7514	VPS18,ENSG00000104142.10,protein_coding,chr15:40894430-40903975	VPS18	1	-64	TGGAATTTAACT	+	7.80453
chr15	40886582	40887251	nearest	-7514	VPS18,ENSG00000104142.10,protein_coding,chr15:40894430-40903975	VPS18	1	170	GCCAGAATTCCA	-	7.89676
chr15	37113207	37113774	nearest	12191	MEIS2,ENSG00000134138.19,protein_coding,chr15:36889204-37101299	MEIS2	1	223	GGCTGCATTCCA	-	10.59
chr15	37058398	37058578	nearest	-42811	MEIS2,ENSG00000134138.19,protein_coding,chr15:36889204-37101299	MEIS2	1	16	CACAGCATTCCT	-	9.27868
chr15	37058398	37058578	nearest	-42811	MEIS2,ENSG00000134138.19,protein_coding,chr15:36889204-37101299	MEIS2	1	-1	GAGTACATTCCC	-	8.24371
chr15	37014644	37015333	nearest	-86311	MEIS2,ENSG00000134138.19,protein_coding,chr15:36889204-37101299	MEIS2	1	-188	GGGGGCATTCCT	-	9.00672
chr15	37002146	37002314	nearest	-99069	MEIS2,ENSG00000134138.19,protein_coding,chr15:36889204-37101299	MEIS2	1	-1	CCATACATTCCC	-	7.82443
chr15	34799231	34799852	nearest	3402	ACTC1,ENSG00000159251.6,protein_coding,chr15:34788096-34796139	ACTC1	1	277	CTAAACATTCCT	-	8.21327
chr15	26767112	26767717	nearest	-98949	GABRA5,ENSG00000186297.11,protein_coding,chr15:26866363-26949207	GABRA5	1	118	GACTGAATTCCT	-	8.80101
chr14	104171257	104171990	nearest	32900	KIF26A,ENSG00000066735.14,protein_coding,chr14:104138723-104180894	KIF26A	1	-26	GTCCACATTCCT	-	9.53365
chr14	100383756	100384115	nearest	7130	WARS,ENSG00000140105.17,protein_coding,chr14:100333788-100376805	WARS	1	-8	AGGAATGCCCTG	+	7.8446
chr14	99364009	99364393	nearest	92677	BCL11B,ENSG00000127152.17,protein_coding,chr14:99169287-99271524	BCL11B	1	-168	TAATGCATTCCC	-	8.28719
chr14	99327936	99328191	nearest	56539	BCL11B,ENSG00000127152.17,protein_coding,chr14:99169287-99271524	BCL11B	1	-19	AGATGAATTCCA	-	8.05501
chr14	99258375	99258705	nearest	-12984	BCL11B,ENSG00000127152.17,protein_coding,chr14:99169287-99271524	BCL11B	1	-77	ACTCACATTCCT	-	8.3008
chr14	99245478	99246945	nearest	-25313	BCL11B,ENSG00000127152.17,protein_coding,chr14:99169287-99271524	BCL11B	1	-195	GCCTGCATTCCA	-	9.79232
chr14	99245478	99246945	nearest	-25313	BCL11B,ENSG00000127152.17,protein_coding,chr14:99169287-99271524	BCL11B	1	-493	TTCCACATTCCC	-	8.39237
chr14	99218318	99218636	nearest	-53047	BCL11B,ENSG00000127152.17,protein_coding,chr14:99169287-99271524	BCL11B	1	63	CACCACATTCCT	-	9.16386
chr14	92995573	92995982	nearest	72697	CHGA,ENSG00000100604.12,protein_coding,chr14:92923080-92935293	CHGA	1	-161	CCTCGCATTCCA	-	7.89239
chr14	92880857	92881545	nearest	-41879	CHGA,ENSG00000100604.12,protein_coding,chr14:92923080-92935293	CHGA	1	-316	TTCTTCATTCCT	-	7.91355
chr14	77707367	77708263	nearest	-205	ALKBH1,ENSG00000100601.9,protein_coding,chr14:77672404-77708020	ALKBH1	1	376	AGAAGAATTCCT	-	7.90579
chr14	76687756	76687943	nearest	-74340	VASH1,ENSG00000071246.10,protein_coding,chr14:76762189-76783015	VASH1	1	20	AGGAATGCTAGA	+	8.39901
chr14	76050921	76051118	nearest	68028	TGFB3,ENSG00000119699.7,protein_coding,chr14:75958099-75982991	TGFB3	1	-15	GGCAACATTCTC	-	7.96774
chr14	74362314	74362813	nearest	59494	VRTN,ENSG00000133980.4,protein_coding,chr14:74303069-74360008	VRTN	1	-103	GGGAATGTTACC	+	8.53875
chr14	74362314	74362813	nearest	59494	VRTN,ENSG00000133980.4,protein_coding,chr14:74303069-74360008	VRTN	1	-213	CCCTGCATTCTT	-	8.08116
chr14	56855850	56856454	nearest	45673	OTX2,ENSG00000165588.16,protein_coding,chr14:56799905-56810479	OTX2	1	208	AGGAATGTGCTG	+	8.12678
chr14	56805474	56806029	nearest	-4728	OTX2,ENSG00000165588.16,protein_coding,chr14:56799905-56810479	OTX2	1	153	CATTGCATTCCT	-	8.79239
chr14	55430106	55430430	nearest	18410	ATG14,ENSG00000126775.8,protein_coding,chr14:55366392-55411858	ATG14	1	-72	AGGTGAATTCCA	-	7.8294
chr14	55427598	55428292	nearest	16087	ATG14,ENSG00000126775.8,protein_coding,chr14:55366392-55411858	ATG14	1	89	TACAGCATTCTT	-	7.96823
chr14	54489981	54490453	nearest	1021	GMFB,ENSG00000197045.12,protein_coding,chr14:54474484-54489196	GMFB	1	155	TTCAACATTCCT	-	9.22821
chr14	50896434	50896867	nearest	24490	ABHD12B,ENSG00000131969.14,protein_coding,chr14:50872160-50904970	ABHD12B	1	-125	GATGACATTCCA	-	8.01698
chr14	50893122	50893481	nearest	21141	ABHD12B,ENSG00000131969.14,protein_coding,chr14:50872160-50904970	ABHD12B	1	-6	GATGACATTCCA	-	8.01698
chr14	50677538	50677785	nearest	9330	SAV1,ENSG00000151748.14,protein_coding,chr14:50632058-50668331	SAV1	1	110	AGGAATGTAAAG	+	8.53847
chr14	50675727	50676095	nearest	7580	SAV1,ENSG00000151748.14,protein_coding,chr14:50632058-50668331	SAV1	1	-135	AGGAATTTGGGA	+	7.78816
chr14	50675727	50676095	nearest	7580	SAV1,ENSG00000151748.14,protein_coding,chr14:50632058-50668331	SAV1	1	-99	AGATTCATTCCT	-	7.91101
chr14	50670538	50670915	nearest	2395	SAV1,ENSG00000151748.14,protein_coding,chr14:50632058-50668331	SAV1	1	-138	GATTACATTCCT	-	9.17799
chr14	50619605	50619967	nearest	-48545	SAV1,ENSG00000151748.14,protein_coding,chr14:50632058-50668331	SAV1	1	90	GGGAATGCATTA	+	8.28719
chr14	39110023	39110660	nearest	695	SEC23A,ENSG00000100934.14,protein_coding,chr14:39031919-39109646	SEC23A	1	145	TGGAATGTGGCG	+	9.51394
chr14	39102434	39103565	nearest	-6647	SEC23A,ENSG00000100934.14,protein_coding,chr14:39031919-39109646	SEC23A	1	-316	AGGAATGAAACA	+	7.76299
chr14	39085983	39086570	nearest	-23370	SEC23A,ENSG00000100934.14,protein_coding,chr14:39031919-39109646	SEC23A	1	-120	AAACGCATTCCT	-	8.69151
chr14	34554905	34555243	nearest	15363	EAPP,ENSG00000129518.8,protein_coding,chr14:34515929-34539711	EAPP	1	11	GCTTACATTCCA	-	8.73036
chr14	34520402	34520898	nearest	-19061	EAPP,ENSG00000129518.8,protein_coding,chr14:34515929-34539711	EAPP	1	-102	TGGAATGCAGTG	+	9.42789
chr14	26531994	26532192	nearest	-65661	NOVA1,ENSG00000139910.19,protein_coding,chr14:26443093-26597754	NOVA1	1	8	AGGAATGTAAAA	+	8.74193
chr14	21536725	21536929	nearest	-389	SALL2,ENSG00000165821.11,protein_coding,chr14:21521081-21537216	SALL2	1	97	CGAGACATTCCC	-	7.76853
chr13	98807755	98808155	nearest	55301	SLC15A1,ENSG00000088386.15,protein_coding,chr13:98683801-98752654	SLC15A1	1	58	AAGAATGCAGTC	+	8.72604
chr13	98796824	98797027	nearest	44271	SLC15A1,ENSG00000088386.15,protein_coding,chr13:98683801-98752654	SLC15A1	1	78	TGCTACATTCTC	-	8.12317
chr13	98751291	98751817	nearest	-1100	SLC15A1,ENSG00000088386.15,protein_coding,chr13:98683801-98752654	SLC15A1	1	224	ACCGACATTCCT	-	8.84246
chr13	67258500	67258978	nearest	28294	PCDH9,ENSG00000184226.14,protein_coding,chr13:66302834-67230445	PCDH9	1	40	TGGAATGTCTTT	+	7.86381
chr13	40585298	40585711	nearest	-81093	FOXO1,ENSG00000150907.6,protein_coding,chr13:40555667-40666597	FOXO1	1	120	TGGAATGCGCTT	+	8.1585
chr13	30893056	30893275	nearest	-13026	MEDAG,ENSG00000102802.9,protein_coding,chr13:30906191-30925572	MEDAG	1	42	CACTGAATTCCT	-	8.29636
chr13	30885372	30885786	nearest	-20612	MEDAG,ENSG00000102802.9,protein_coding,chr13:30906191-30925572	MEDAG	1	-50	TGGAATTCAGAA	+	8.05755
chr13	30885372	30885786	nearest	-20612	MEDAG,ENSG00000102802.9,protein_coding,chr13:30906191-30925572	MEDAG	1	-71	TGGGACATTCCT	-	8.58648
chr13	25406310	25406716	nearest	34442	ATP8A2,ENSG00000132932.16,protein_coding,chr13:25372071-26025851	ATP8A2	1	67	GGGAATGCAGAA	+	8.9638
chr13	24716015	24716366	nearest	35779	ATP12A,ENSG00000075673.11,protein_coding,chr13:24680411-24712493	ATP12A	1	170	GCCAACATTCCT	-	9.52404
chr13	24688240	24688390	nearest	7904	ATP12A,ENSG00000075673.11,protein_coding,chr13:24680411-24712493	ATP12A	1	-55	AGGAATGTCTAA	+	8.01975
chr13	24630646	24631158	nearest	-49509	ATP12A,ENSG00000075673.11,protein_coding,chr13:24680411-24712493	ATP12A	1	70	AGGAATTCAGCA	+	9.15729
chr13	24617719	24618108	nearest	-62498	ATP12A,ENSG00000075673.11,protein_coding,chr13:24680411-24712493	ATP12A	1	46	ACCGACATTCCT	-	8.84246
chr12	130649145	130649320	nearest	-67049	RIMBP2,ENSG00000060709.13,protein_coding,chr12:130396137-130716281	RIMBP2	1	11	TGGAATGTGGGG	+	8.71624
chr12	122500248	122501431	nearest	-234	ZCCHC8,ENSG00000033030.13,protein_coding,chr12:122471600-122501073	ZCCHC8	1	-325	TGGAATTCTGGC	+	7.89676
chr12	122466786	122467801	nearest	-33780	ZCCHC8,ENSG00000033030.13,protein_coding,chr12:122471600-122501073	ZCCHC8	1	-232	AGGAATGCAGCC	+	10.8974
chr12	121532155	121532811	nearest	-48532	KDM2B,ENSG00000089094.16,protein_coding,chr12:121429097-121581015	KDM2B	1	-278	TAGAATGCTTCC	+	7.80802
chr12	118182292	118182590	nearest	46415	VSIG10,ENSG00000176834.13,protein_coding,chr12:118063593-118136026	VSIG10	1	101	AACAAAATTCCT	-	7.94074
chr12	117470887	117471109	nearest	18828	NOS1,ENSG00000089250.18,protein_coding,chr12:117208142-117452170	NOS1	1	63	TGGAATGCATAT	+	8.70161
chr12	117461954	117462104	nearest	9859	NOS1,ENSG00000089250.18,protein_coding,chr12:117208142-117452170	NOS1	1	21	TGGAATTCAGTG	+	7.98896
chr12	113422155	113422693	nearest	187	SDSL,ENSG00000139410.14,protein_coding,chr12:113422237-113438276	SDSL	1	205	GGGAATGTCGAT	+	8.00773
chr12	110807607	110807919	nearest	-39006	CCDC63,ENSG00000173093.12,protein_coding,chr12:110846769-110907535	CCDC63	1	4	TAGAATGCAGCA	+	8.77492
chr12	104371472	104371687	nearest	67840	EID3,ENSG00000255150.1,protein_coding,chr12:104303739-104305202	EID3	1	-3	AGGAATGTGGCT	+	10.0414
chr12	104367169	104367875	nearest	63783	EID3,ENSG00000255150.1,protein_coding,chr12:104303739-104305202	EID3	1	-265	AAGTGCATTCCA	-	8.61087
chr12	104271209	104272658	nearest	-31806	EID3,ENSG00000255150.1,protein_coding,chr12:104303739-104305202	EID3	1	-268	TGGAATGTCATC	+	8.01698
chr12	104271209	104272658	nearest	-31806	EID3,ENSG00000255150.1,protein_coding,chr12:104303739-104305202	EID3	1	373	CTAAACATTCCA	-	7.90587
chr12	93582230	93582513	nearest	12557	SOCS2,ENSG00000120833.13,protein_coding,chr12:93569814-93583487	SOCS2	1	-60	TGGAATTTATCC	+	8.22054
chr12	93537847	93538047	nearest	-31867	SOCS2,ENSG00000120833.13,protein_coding,chr12:93569814-93583487	SOCS2	1	-48	TGGAATGTATCC	+	9.65948
chr12	93537847	93538047	nearest	-31867	SOCS2,ENSG00000120833.13,protein_coding,chr12:93569814-93583487	SOCS2	1	66	TGGAATGTTAGT	+	7.98915
chr12	93370749	93371358	nearest	-6830	NUDT4,ENSG00000173598.13,protein_coding,chr12:93377883-93408146	NUDT4	1	81	GTTAGCATTCCT	-	8.70556
chr12	93336384	93336793	nearest	-41295	NUDT4,ENSG00000173598.13,protein_coding,chr12:93377883-93408146	NUDT4	1	-73	TGGAATGTGACC	+	9.07569
chr12	93314264	93315498	nearest	-63002	NUDT4,ENSG00000173598.13,protein_coding,chr12:93377883-93408146	NUDT4	1	-296	TAGAATGTGGCT	+	8.22009
chr12	69332134	69333099	nearest	-15725	LYZ,ENSG00000090382.6,protein_coding,chr12:69348341-69354234	LYZ	1	-37	GATGACATTCCA	-	8.01698
chr12	66279163	66279425	nearest	-23251	HELB,ENSG00000127311.9,protein_coding,chr12:66302545-66347645	HELB	1	-123	TGGAATGTTCAC	+	8.18492
chr12	66269847	66270060	nearest	-32592	HELB,ENSG00000127311.9,protein_coding,chr12:66302545-66347645	HELB	1	3	AGGAATGCTTCA	+	9.32813
chr12	66269847	66270060	nearest	-32592	HELB,ENSG00000127311.9,protein_coding,chr12:66302545-66347645	HELB	1	51	CTCTACATTCCA	-	9.17397
chr12	65300847	65301110	nearest	22335	MSRB3,ENSG00000174099.10,protein_coding,chr12:65278643-65488244	MSRB3	1	-4	AAGTGCATTCCT	-	8.91827
chr12	57632450	57633360	nearest	-450	B4GALNT1,ENSG00000135454.13,protein_coding,chr12:57623410-57633355	B4GALNT1	1	288	GGGAATGCGAGC	+	7.86435
chr12	51941307	51941547	nearest	-10240	ACVR1B,ENSG00000135503.12,protein_coding,chr12:51951667-51997078	ACVR1B	1	-116	AGGAATGAGGAC	+	7.76237
chr12	48037499	48037810	nearest	33168	COL2A1,ENSG00000139219.17,protein_coding,chr12:47972965-48004486	COL2A1	1	52	CTCTGCATTCCT	-	9.60042
chr12	48021685	48022220	nearest	17466	COL2A1,ENSG00000139219.17,protein_coding,chr12:47972965-48004486	COL2A1	1	115	AGGAATGTAATC	+	9.17799
chr12	48000962	48001795	nearest	-3108	COL2A1,ENSG00000139219.17,protein_coding,chr12:47972965-48004486	COL2A1	1	70	TGGAATGCAGGC	+	9.79232
chr12	47850640	47850961	nearest	17668	HDAC7,ENSG00000061273.17,protein_coding,chr12:47782722-47833132	HDAC7	1	84	TCCCGCATTCCC	-	8.50606
chr12	47758847	47759366	nearest	5190	SLC48A1,ENSG00000211584.13,protein_coding,chr12:47753916-47782753	SLC48A1	1	-120	AGGAATGCGTAG	+	8.33658
chr12	32183586	32184112	nearest	77014	BICD1,ENSG00000151746.13,protein_coding,chr12:32106835-32383633	BICD1	1	53	AAGAATGCTGTA	+	7.96823
chr12	32023686	32024123	nearest	64534	KIAA1551,ENSG00000174718.11,protein_coding,chr12:31959370-31993107	KIAA1551	1	-64	GGTTGCATTCTT	-	8.44061
chr12	32021092	32021458	nearest	61905	KIAA1551,ENSG00000174718.11,protein_coding,chr12:31959370-31993107	KIAA1551	1	171	GGGAATGCATCC	+	9.24585
chr12	31985910	31986282	nearest	26726	KIAA1551,ENSG00000174718.11,protein_coding,chr12:31959370-31993107	KIAA1551	1	167	TTCCACATTCCT	-	9.23246
chr12	31985910	31986282	nearest	26726	KIAA1551,ENSG00000174718.11,protein_coding,chr12:31959370-31993107	KIAA1551	1	160	AAAAACATTCCA	-	8.2608
chr12	31958656	31958875	nearest	-605	KIAA1551,ENSG00000174718.11,protein_coding,chr12:31959370-31993107	KIAA1551	1	-38	TTTAACATTCCA	-	7.97792
chr12	31957435	31957810	nearest	-1748	KIAA1551,ENSG00000174718.11,protein_coding,chr12:31959370-31993107	KIAA1551	1	-105	GATGACATTCCA	-	8.01698
chr12	30926608	30927078	nearest	415	TSPAN11,ENSG00000110900.14,protein_coding,chr12:30926428-30996599	TSPAN11	1	126	AGGAATGCCTGG	+	7.92998
chr12	21794857	21795966	nearest	19830	KCNJ8,ENSG00000121361.3,protein_coding,chr12:21764955-21775581	KCNJ8	1	-518	AAGAATGCTGCC	+	8.9269
chr12	14705709	14705924	nearest	9231	GUCY2C,ENSG00000070019.4,protein_coding,chr12:14612632-14696585	GUCY2C	1	-49	TGGAATGTCATC	+	8.01698
chr12	13255743	13256523	nearest	59417	EMP1,ENSG00000134531.9,protein_coding,chr12:13196716-13219939	EMP1	1	99	AGGAATTCATCC	+	8.647
chr12	13157806	13157979	nearest	-38824	EMP1,ENSG00000134531.9,protein_coding,chr12:13196716-13219939	EMP1	1	-8	TGGAATGCAGTG	+	9.42789
chr12	12533276	12533651	nearest	-28920	DUSP16,ENSG00000111266.8,protein_coding,chr12:12474210-12562383	DUSP16	1	-41	GAACACATTCCA	-	8.54964
chr12	12057109	12057259	nearest	7340	BCL2L14,ENSG00000121380.12,protein_coding,chr12:12049844-12211084	BCL2L14	1	22	AAAGGCATTCCA	-	7.98287
chr12	11995390	11996059	nearest	-54120	BCL2L14,ENSG00000121380.12,protein_coding,chr12:12049844-12211084	BCL2L14	1	244	CATGGCATTCCT	-	7.93879
chr12	9064194	9065573	nearest	-51346	A2M,ENSG00000175899.14,protein_coding,chr12:9067664-9116229	A2M	1	262	TGGAACATTCCC	-	8.14337
chr12	9064194	9065573	nearest	-51346	A2M,ENSG00000175899.14,protein_coding,chr12:9067664-9116229	A2M	1	-9	CGCCGCATTCCT	-	9.94039
chr12	8722490	8722887	nearest	41088	RIMKLB,ENSG00000166532.15,protein_coding,chr12:8681600-8783095	RIMKLB	1	-165	TGGAATGCTAAA	+	8.09698
chr12	7825652	7826074	nearest	38069	NANOG,ENSG00000111704.10,protein_coding,chr12:7787794-7799141	NANOG	1	150	AGGTACATTCTT	-	7.94277
chr12	7825652	7826074	nearest	38069	NANOG,ENSG00000111704.10,protein_coding,chr12:7787794-7799141	NANOG	1	95	AGGTGCATTCTT	-	8.06183
chr12	6995982	6996458	nearest	7961	C1S,ENSG00000182326.14,protein_coding,chr12:6988259-7071032	C1S	1	-32	TGGAATGTTAAG	+	7.77445
chr12	6885923	6886617	nearest	-3088	SPSB2,ENSG00000111671.9,protein_coding,chr12:6870935-6889358	SPSB2	1	95	AGAGGCATTCCT	-	8.94774
chr12	6662744	6663521	nearest	-16	ING4,ENSG00000111653.19,protein_coding,chr12:6650280-6663148	ING4	1	321	GGGAATGTATGG	+	7.82443
chr12	6376698	6376906	nearest	-928	SCNN1A,ENSG00000111319.12,protein_coding,chr12:6346843-6377730	SCNN1A	1	2	AGGAATGTGGTC	+	9.66852
chr12	6143847	6144021	nearest	19164	VWF,ENSG00000110799.13,protein_coding,chr12:5948874-6124770	VWF	1	4	CACTGCATTCCA	-	9.42789
chr12	6084326	6085145	nearest	-40035	VWF,ENSG00000110799.13,protein_coding,chr12:5948874-6124770	VWF	1	202	ACCCGCATTCCA	-	9.05536
chr12	6084326	6085145	nearest	-40035	VWF,ENSG00000110799.13,protein_coding,chr12:5948874-6124770	VWF	1	-72	GGGGACATTCCT	-	8.88766
chr12	5348586	5348777	nearest	-83431	NTF3,ENSG00000185652.11,protein_coding,chr12:5432112-5521536	NTF3	1	-69	GGCTGAATTCCC	-	8.61839
chr12	5343744	5344411	nearest	-88035	NTF3,ENSG00000185652.11,protein_coding,chr12:5432112-5521536	NTF3	1	-150	ACGCGCATTCCA	-	8.01827
chr12	5343744	5344411	nearest	-88035	NTF3,ENSG00000185652.11,protein_coding,chr12:5432112-5521536	NTF3	1	-292	CTGTACATTCCT	-	8.44428
chr11	130383693	130383853	nearest	-45220	ADAMTS8,ENSG00000134917.9,protein_coding,chr11:130404925-130428993	ADAMTS8	1	-22	AGGAATGTGTGC	+	8.71681
chr11	130377992	130378603	nearest	-50696	ADAMTS8,ENSG00000134917.9,protein_coding,chr11:130404925-130428993	ADAMTS8	1	37	AGGAATGCAACC	+	9.95452
chr11	130295735	130295902	nearest	-18868	ZBTB44,ENSG00000196323.11,protein_coding,chr11:130226677-130314686	ZBTB44	1	-27	AGGAATGCATGC	+	9.28824
chr11	130289014	130289487	nearest	-25436	ZBTB44,ENSG00000196323.11,protein_coding,chr11:130226677-130314686	ZBTB44	1	-1	AGGAATGTGGGT	+	9.2437
chr11	125978221	125978485	nearest	74977	DDX25,ENSG00000109832.12,protein_coding,chr11:125903376-125928829	DDX25	1	68	AGGAATGCTGAA	+	9.34727
chr11	125978221	125978485	nearest	74977	DDX25,ENSG00000109832.12,protein_coding,chr11:125903376-125928829	DDX25	1	24	GTGTACATTCCA	-	8.64153
chr11	125146352	125146502	nearest	-18260	PKNOX2,ENSG00000165495.15,protein_coding,chr11:125164687-125433389	PKNOX2	1	-17	TGGAATTTGGTC	+	7.92218
chr11	114130165	114130394	nearest	70686	ZBTB16,ENSG00000109906.13,protein_coding,chr11:114059593-114250676	ZBTB16	1	-31	GGGAATGTATCC	+	9.12679
chr11	113975006	113975662	nearest	453	HTR3A,ENSG00000166736.11,protein_coding,chr11:113974881-113990313	HTR3A	1	244	AGGAATGTTGAG	+	9.02475
chr11	113951527	113952315	nearest	-22960	HTR3A,ENSG00000166736.11,protein_coding,chr11:113974881-113990313	HTR3A	1	-180	TAGAATGCATCC	+	8.26464
chr11	113884010	113884644	nearest	8757	USP28,ENSG00000048028.11,protein_coding,chr11:113797874-113875570	USP28	1	189	CATTGCATTCCA	-	8.48499
chr11	113860533	113861170	nearest	-14719	USP28,ENSG00000048028.11,protein_coding,chr11:113797874-113875570	USP28	1	237	CACTGCATTCCA	-	9.42789
chr11	100927629	100927789	nearest	-64280	TMEM133,ENSG00000170647.3,protein_coding,chr11:100991989-100993941	TMEM133	1	27	ATCTGAATTCCA	-	8.07415
chr11	100753076	100753443	nearest	65606	ARHGAP42,ENSG00000165895.17,protein_coding,chr11:100687653-100991937	ARHGAP42	1	89	AGCTGAATTCCA	-	8.86649
chr11	100719343	100720077	nearest	32057	ARHGAP42,ENSG00000165895.17,protein_coding,chr11:100687653-100991937	ARHGAP42	1	266	TGCCAAATTCCT	-	8.58586
chr11	100704311	100704692	nearest	16848	ARHGAP42,ENSG00000165895.17,protein_coding,chr11:100687653-100991937	ARHGAP42	1	24	GCCTTCATTCCT	-	8.20938
chr11	100691782	100692193	nearest	4334	ARHGAP42,ENSG00000165895.17,protein_coding,chr11:100687653-100991937	ARHGAP42	1	94	ATCAGCATTCCT	-	9.36387
chr11	93573939	93574128	nearest	30525	SMCO4,ENSG00000166002.6,protein_coding,chr11:93478472-93543508	SMCO4	1	-6	AGGAATTCAGGA	+	8.35959
chr11	90122953	90123478	nearest	-8300	NAALAD2,ENSG00000077616.10,protein_coding,chr11:90131515-90192894	NAALAD2	1	130	TGGAATGTGAAT	+	7.99876
chr11	79371252	79371402	nearest	-69621	TENM4,ENSG00000149256.14,protein_coding,chr11:78652831-79440948	TENM4	1	55	GGGAATGTTGTG	+	8.31952
chr11	75554324	75554830	nearest	-7479	SERPINH1,ENSG00000149257.13,protein_coding,chr11:75562056-75572783	SERPINH1	1	-211	GGGAATGCTGAG	+	8.30372
chr11	72144067	72144301	nearest	29315	FOLR3,ENSG00000110203.8,protein_coding,chr11:72114869-72139892	FOLR3	1	22	AGGAATGTCTTA	+	8.15461
chr11	72139116	72139283	nearest	24330	FOLR3,ENSG00000110203.8,protein_coding,chr11:72114869-72139892	FOLR3	1	28	AGGAATTCGGGT	+	7.92382
chr11	68855257	68855876	nearest	11156	CPT1A,ENSG00000110090.12,protein_coding,chr11:68754620-68844410	CPT1A	1	256	AGAAGCATTCCT	-	9.34473
chr11	64743516	64744033	nearest	-1682	RASGRP2,ENSG00000068831.18,protein_coding,chr11:64726911-64745456	RASGRP2	1	-245	AGGAACATTCCT	-	9.00006
chr11	63528112	63528508	nearest	-8499	RARRES3,ENSG00000133321.10,protein_coding,chr11:63536809-63546462	RARRES3	1	110	CGAGACATTCCA	-	8.30122
chr11	62753708	62754552	nearest	-58	ZBTB3,ENSG00000185670.7,protein_coding,chr11:62748319-62754188	ZBTB3	1	-52	TCACGCATTCCA	-	8.22728
chr11	46918137	46918768	nearest	-190	LRP4,ENSG00000134569.9,protein_coding,chr11:46856868-46918642	LRP4	1	308	CCCCACATTCCT	-	9.02363
chr11	46906570	46907004	nearest	-11855	LRP4,ENSG00000134569.9,protein_coding,chr11:46856868-46918642	LRP4	1	24	CAAAGCATTCCA	-	8.1598
chr11	46625354	46626073	nearest	7804	HARBI1,ENSG00000180423.4,protein_coding,chr11:46602861-46617909	HARBI1	1	-52	AGGAATTCCGCT	+	8.32028
chr11	46609314	46609523	nearest	-8109	ATG13,ENSG00000175224.16,protein_coding,chr11:46617527-46674818	ATG13	1	-25	TGGAATGCAGTG	+	9.42789
chr11	46369501	46369940	nearest	-11036	MDK,ENSG00000110492.15,protein_coding,chr11:46380756-46383837	MDK	1	-185	AGGAATGTCCGC	+	8.08996
chr11	44601023	44601272	nearest	36720	CD82,ENSG00000085117.11,protein_coding,chr11:44564427-44620363	CD82	1	58	TGGAATGTGGCC	+	10.0186
chr11	44565069	44565812	nearest	1013	CD82,ENSG00000085117.11,protein_coding,chr11:44564427-44620363	CD82	1	-328	TGGAATGCCAGC	+	7.99581
chr11	41431805	41432067	nearest	-27837	LRRC4C,ENSG00000148948.7,protein_coding,chr11:40114203-41459773	LRRC4C	1	-118	AAGAGCATTCCA	-	8.15425
chr11	35214744	35215333	nearest	76168	CD44,ENSG00000026508.16,protein_coding,chr11:35138870-35232402	CD44	1	-169	AGACACATTCCA	-	8.92252
chr11	35173153	35173417	nearest	34415	CD44,ENSG00000026508.16,protein_coding,chr11:35138870-35232402	CD44	1	-17	AGGAATGCTTTG	+	8.4672
chr11	35151761	35152778	nearest	13399	CD44,ENSG00000026508.16,protein_coding,chr11:35138870-35232402	CD44	1	424	TGGAATGCTCAG	+	7.79932
chr11	35151761	35152778	nearest	13399	CD44,ENSG00000026508.16,protein_coding,chr11:35138870-35232402	CD44	1	-89	AGCCACATTCCA	-	9.734
chr11	35082424	35082902	nearest	-56207	CD44,ENSG00000026508.16,protein_coding,chr11:35138870-35232402	CD44	1	185	TGGAATGCACAC	+	8.76059
chr11	34898498	34898846	nearest	-17157	PDHX,ENSG00000110435.11,protein_coding,chr11:34915829-35020591	PDHX	1	-54	AGGAATGCTGTT	+	9.49874
chr11	30017423	30018008	nearest	692	KCNA4,ENSG00000182255.6,protein_coding,chr11:30009741-30017023	KCNA4	1	-85	GGGAATGTTACA	+	8.23756
chr11	30016678	30017291	nearest	-39	KCNA4,ENSG00000182255.6,protein_coding,chr11:30009741-30017023	KCNA4	1	-32	GCCCGAATTCCT	-	8.20841
chr11	26297261	26297480	nearest	-12229	ANO3,ENSG00000134343.12,protein_coding,chr11:26309599-26663288	ANO3	1	38	AACAACATTCTT	-	7.86577
chr11	26276863	26277133	nearest	-32601	ANO3,ENSG00000134343.12,protein_coding,chr11:26309599-26663288	ANO3	1	49	AGGAATTTGGTT	+	7.94499
chr11	18802590	18803095	nearest	10121	PTPN5,ENSG00000110786.17,protein_coding,chr11:18727928-18792721	PTPN5	1	-44	AGGAATGTGATG	+	8.22096
chr11	18262741	18262988	nearest	-3310	SAA1,ENSG00000173432.10,protein_coding,chr11:18266174-18269977	SAA1	1	1	AGGAATGCCTGG	+	7.92998
chr11	14386993	14387206	nearest	22593	RRAS2,ENSG00000133818.12,protein_coding,chr11:14277926-14364506	RRAS2	1	-81	GGGAATGTAAGA	+	7.89647
chr11	14357971	14359356	nearest	-5843	RRAS2,ENSG00000133818.12,protein_coding,chr11:14277926-14364506	RRAS2	1	-125	GACCACATTCCT	-	9.66852
chr11	14340742	14341049	nearest	-23611	RRAS2,ENSG00000133818.12,protein_coding,chr11:14277926-14364506	RRAS2	1	51	CACAGAATTCCT	-	7.83974
chr11	14275096	14275383	nearest	-89267	RRAS2,ENSG00000133818.12,protein_coding,chr11:14277926-14364506	RRAS2	1	-5	AGGCACATTCCA	-	8.69691
chr11	9318671	9319617	nearest	4364	TMEM41B,ENSG00000166471.10,protein_coding,chr11:9280654-9314780	TMEM41B	1	65	CGAGACATTCCA	-	8.30122
chr11	5690228	5690634	nearest	742	TRIM22,ENSG00000132274.15,protein_coding,chr11:5689689-5737089	TRIM22	1	83	AGGAATGTGAGT	+	8.3008
chr11	5684673	5685263	nearest	-4721	TRIM22,ENSG00000132274.15,protein_coding,chr11:5689689-5737089	TRIM22	1	257	AGAGGCATTCCC	-	8.10765
chr11	2360367	2360789	nearest	-15599	CD81,ENSG00000110651.11,protein_coding,chr11:2376177-2397419	CD81	1	-129	AGGAATGCTGCC	+	10.4408
chr11	2360367	2360789	nearest	-15599	CD81,ENSG00000110651.11,protein_coding,chr11:2376177-2397419	CD81	1	64	GGGAATGCAGGA	+	8.95843
chr10	131874935	131875482	nearest	-25436	PPP2R2D,ENSG00000175470.18,protein_coding,chr10:131900644-131959834	PPP2R2D	1	237	TGGAATGTGTCC	+	9.20711
chr10	131841827	131841977	nearest	-58742	PPP2R2D,ENSG00000175470.18,protein_coding,chr10:131900644-131959834	PPP2R2D	1	7	TGGAATGTGGCC	+	10.0186
chr10	124439868	124440860	nearest	-9820	NKX1-2,ENSG00000229544.8,protein_coding,chr10:124445239-124450184	NKX1-2	1	214	TGGAATGCAATG	+	8.48499
chr10	124436313	124436470	nearest	-13793	NKX1-2,ENSG00000229544.8,protein_coding,chr10:124445239-124450184	NKX1-2	1	8	TGGAATGCAGTG	+	9.42789
chr10	123995307	123996141	nearest	55457	CPXM2,ENSG00000121898.12,protein_coding,chr10:123706207-123940267	CPXM2	1	-238	TCCTGAATTCCA	-	8.05219
chr10	123994285	123995000	nearest	54375	CPXM2,ENSG00000121898.12,protein_coding,chr10:123706207-123940267	CPXM2	1	293	AGGAATTCAATC	+	7.85811
chr10	123973381	123973531	nearest	33189	CPXM2,ENSG00000121898.12,protein_coding,chr10:123706207-123940267	CPXM2	1	-43	TGGAATGCAAAA	+	8.55359
chr10	123967612	123967964	nearest	27521	CPXM2,ENSG00000121898.12,protein_coding,chr10:123706207-123940267	CPXM2	1	52	CGGTGCATTCCC	-	8.51558
chr10	116682289	116682858	nearest	12309	C10orf82,ENSG00000165863.16,protein_coding,chr10:116663696-116670264	C10orf82	1	-185	AGGAATTTTGTC	+	8.22533
chr10	114634583	114634967	nearest	-50228	ABLIM1,ENSG00000099204.18,protein_coding,chr10:114431113-114685003	ABLIM1	1	97	TGGAATGTGGGA	+	8.9197
chr10	102639532	102639838	nearest	-4811	TRIM8,ENSG00000171206.13,protein_coding,chr10:102644496-102658407	TRIM8	1	-95	GGGAATGCAGGA	+	8.95843
chr10	102639532	102639838	nearest	-4811	TRIM8,ENSG00000171206.13,protein_coding,chr10:102644496-102658407	TRIM8	1	-71	TGGAATGTGAAG	+	7.7787
chr10	102597220	102597370	nearest	-47201	TRIM8,ENSG00000171206.13,protein_coding,chr10:102644496-102658407	TRIM8	1	22	CTCAGCATTCCA	-	8.83641
chr10	99938159	99938965	nearest	-71357	DNMBP,ENSG00000107554.15,protein_coding,chr10:99875577-100009919	DNMBP	1	-48	CACTGCATTCCA	-	9.42789
chr10	99913679	99914281	nearest	-95939	DNMBP,ENSG00000107554.15,protein_coding,chr10:99875577-100009919	DNMBP	1	50	TGGAATGCTCCA	+	8.79513
chr10	95601150	95601586	nearest	39954	SORBS1,ENSG00000095637.20,protein_coding,chr10:95311771-95561414	SORBS1	1	201	GGGAATGTCTCT	+	7.98859
chr10	95566287	95566602	nearest	5030	SORBS1,ENSG00000095637.20,protein_coding,chr10:95311771-95561414	SORBS1	1	-98	TTCCACATTCCT	-	9.23246
chr10	95470438	95470853	nearest	-90769	SORBS1,ENSG00000095637.20,protein_coding,chr10:95311771-95561414	SORBS1	1	70	TGCTGCATTCCC	-	9.75614
chr10	88990437	88991510	nearest	-417	ACTA2,ENSG00000107796.12,protein_coding,chr10:88935074-88991390	ACTA2	1	-502	AGGAATGCCCAT	+	7.92979
chr10	87656568	87656759	nearest	-2950	PAPSS2,ENSG00000198682.12,protein_coding,chr10:87659613-87747705	PAPSS2	1	-80	TGGAATGCTGCA	+	9.83221
chr10	87656568	87656759	nearest	-2950	PAPSS2,ENSG00000198682.12,protein_coding,chr10:87659613-87747705	PAPSS2	1	12	AGTCACATTCCT	-	9.0985
chr10	87651918	87652091	nearest	-7609	PAPSS2,ENSG00000198682.12,protein_coding,chr10:87659613-87747705	PAPSS2	1	-29	AGGAATGTGTGT	+	8.43222
chr10	84125981	84126225	nearest	-13337	GHITM,ENSG00000165678.19,protein_coding,chr10:84139440-84153555	GHITM	1	52	GGGAATGTAATC	+	8.33789
chr10	84108965	84109115	nearest	-30400	GHITM,ENSG00000165678.19,protein_coding,chr10:84139440-84153555	GHITM	1	29	TGGAATGCCTCG	+	8.42028
chr10	73641747	73641923	nearest	78	MYOZ1,ENSG00000177791.11,protein_coding,chr10:73631654-73641757	MYOZ1	1	-34	AGGAATTCAGTC	+	8.80101
chr10	73061119	73061385	nearest	-35722	P4HA1,ENSG00000122884.12,protein_coding,chr10:73007217-73096974	P4HA1	1	128	TGGAACATTCCA	-	8.67607
chr10	72171161	72171816	nearest	-44512	ANAPC16,ENSG00000166295.8,protein_coding,chr10:72216000-72235860	ANAPC16	1	-202	GGCTGCATTCCT	-	10.8974
chr10	71182373	71182573	nearest	-30097	UNC5B,ENSG00000107731.12,protein_coding,chr10:71212570-71302864	UNC5B	1	1	GGCCAAATTCCT	-	8.88705
chr10	70815715	70816638	nearest	215	SGPL1,ENSG00000166224.16,protein_coding,chr10:70815961-70881173	SGPL1	1	392	TGGAATGCTTTG	+	8.1598
chr10	70455060	70455644	nearest	7401	NODAL,ENSG00000156574.9,protein_coding,chr10:70432315-70447951	NODAL	1	92	TGGTGCATTCCC	-	8.71905
chr10	67890571	67891005	nearest	6119	SIRT1,ENSG00000096717.11,protein_coding,chr10:67884669-67918390	SIRT1	1	125	ACCTGCATTCCC	-	8.97503
chr10	59678848	59679422	nearest	-56867	SLC16A9,ENSG00000165449.11,protein_coding,chr10:59650761-59736002	SLC16A9	1	-229	AGGAATTCAGTA	+	8.49982
chr10	59674264	59674533	nearest	-61604	SLC16A9,ENSG00000165449.11,protein_coding,chr10:59650761-59736002	SLC16A9	1	1	TCCCACATTCCT	-	9.2271
chr10	58256230	58256569	nearest	-11535	IPMK,ENSG00000151151.5,protein_coding,chr10:58191517-58267934	IPMK	1	-129	AGGAATGCATTC	+	9.42847
chr10	58256230	58256569	nearest	-11535	IPMK,ENSG00000151151.5,protein_coding,chr10:58191517-58267934	IPMK	1	-116	GAATGCATTCCC	-	8.58837
chr10	44952764	44953205	nearest	-6423	RASSF4,ENSG00000107551.20,protein_coding,chr10:44959407-44995891	RASSF4	1	-5	TTTTACATTCCT	-	8.74193
chr10	43458260	43458538	nearest	21558	ZNF487,ENSG00000243660.9,protein_coding,chr10:43436841-43483179	ZNF487	1	8	AGTTGCATTCTT	-	8.15602
chr10	43377363	43377669	nearest	5874	FXYD4,ENSG00000150201.14,protein_coding,chr10:43371642-43376335	FXYD4	1	15	TGGAATGCAGGC	+	9.79232
chr10	43362049	43362992	nearest	-9122	FXYD4,ENSG00000150201.14,protein_coding,chr10:43371642-43376335	FXYD4	1	-90	ATAGACATTCCT	-	8.03634
chr10	43340196	43340450	nearest	-31319	FXYD4,ENSG00000150201.14,protein_coding,chr10:43371642-43376335	FXYD4	1	54	GGCAGAATTCCA	-	8.69446
chr10	43337609	43337896	nearest	-33890	FXYD4,ENSG00000150201.14,protein_coding,chr10:43371642-43376335	FXYD4	1	-95	AGGAATGCCTCT	+	8.94774
chr10	43337609	43337896	nearest	-33890	FXYD4,ENSG00000150201.14,protein_coding,chr10:43371642-43376335	FXYD4	1	-33	TGGAATGTCTCG	+	8.30122
chr10	43320307	43321280	nearest	-50849	FXYD4,ENSG00000150201.14,protein_coding,chr10:43371642-43376335	FXYD4	1	-105	GATGACATTCCA	-	8.01698
chr10	43320307	43321280	nearest	-50849	FXYD4,ENSG00000150201.14,protein_coding,chr10:43371642-43376335	FXYD4	1	-341	CCTAACATTCCT	-	8.07649
chr10	31962865	31963562	nearest	34337	ARHGAP12,ENSG00000165322.17,protein_coding,chr10:31805404-31928876	ARHGAP12	1	-34	CAGCACATTCCT	-	8.12678
chr10	31947674	31947887	nearest	18904	ARHGAP12,ENSG00000165322.17,protein_coding,chr10:31805404-31928876	ARHGAP12	1	-9	GTGTACATTCCA	-	8.64153
chr10	31944875	31945298	nearest	16210	ARHGAP12,ENSG00000165322.17,protein_coding,chr10:31805404-31928876	ARHGAP12	1	-90	GGAAGAATTCCA	-	7.88299
chr10	23504171	23504422	nearest	64838	OTUD1,ENSG00000165312.6,protein_coding,chr10:23439458-23442390	OTUD1	1	-59	GGGAATGCCGCT	+	8.91913
chr10	23438415	23439633	nearest	-434	OTUD1,ENSG00000165312.6,protein_coding,chr10:23439458-23442390	OTUD1	1	244	AGGAATTTGGCC	+	8.88705
chr10	23438415	23439633	nearest	-434	OTUD1,ENSG00000165312.6,protein_coding,chr10:23439458-23442390	OTUD1	1	-13	CCGCGCATTCCA	-	7.79821
chr10	15084477	15084936	nearest	-4070	ACBD7,ENSG00000176244.6,protein_coding,chr10:15077523-15088776	ACBD7	1	89	AGGTACATTCCT	-	9.45668
chr10	15084477	15084936	nearest	-4070	ACBD7,ENSG00000176244.6,protein_coding,chr10:15077523-15088776	ACBD7	1	-164	AAGTACATTCCA	-	8.49181
chr10	15046553	15047365	nearest	14732	OLAH,ENSG00000152463.14,protein_coding,chr10:15032227-15073852	OLAH	1	-119	TGGAATGTTTTC	+	8.54539
chr10	11036528	11036829	nearest	31357	CELF2,ENSG00000048740.17,protein_coding,chr10:11005321-11336675	CELF2	1	-116	TTGGACATTCCT	-	7.79414
chr10	10911447	10911772	nearest	-93712	CELF2,ENSG00000048740.17,protein_coding,chr10:11005321-11336675	CELF2	1	-40	CAGTGCATTCCT	-	8.69821
chr1	247007586	247008349	nearest	-126	ZNF695,ENSG00000197472.14,protein_coding,chr1:246945547-247008093	ZNF695	1	291	AGCGACATTCCT	-	9.64016
chr1	236932449	236932666	nearest	-71861	MT1HL1,ENSG00000244020.2,protein_coding,chr1:237004103-237004418	MT1HL1	1	62	TGGAATGTCATC	+	8.01698
chr1	235822761	235822937	nearest	-60791	LYST,ENSG00000143669.13,protein_coding,chr1:235661041-235883640	LYST	1	-22	TGGAATGTTTCC	+	9.20287
chr1	235814587	235815014	nearest	-68840	LYST,ENSG00000143669.13,protein_coding,chr1:235661041-235883640	LYST	1	-173	TGGAATGCCCCT	+	8.41473
chr1	226866142	226866433	nearest	-3897	PSEN2,ENSG00000143801.16,protein_coding,chr1:226870184-226896105	PSEN2	1	-78	TGGAATGCAGTG	+	9.42789
chr1	226838054	226838204	nearest	-32055	PSEN2,ENSG00000143801.16,protein_coding,chr1:226870184-226896105	PSEN2	1	29	TGTGACATTCCT	-	8.68066
chr1	226838054	226838204	nearest	-32055	PSEN2,ENSG00000143801.16,protein_coding,chr1:226870184-226896105	PSEN2	1	-28	GATGACATTCCA	-	8.01698
chr1	225968861	225969386	nearest	27634	LEFTY2,ENSG00000143768.11,protein_coding,chr1:225936598-225941489	LEFTY2	1	-137	GCCCACATTCCA	-	9.22089
chr1	222906338	222906679	nearest	34237	DISP1,ENSG00000154309.8,protein_coding,chr1:222872271-223005995	DISP1	1	-58	GGCTGCATTCCC	-	10.0573
chr1	207405009	207405291	nearest	-49080	CR2,ENSG00000117322.16,protein_coding,chr1:207454230-207489895	CR2	1	40	AGGAATTCTGTG	+	7.83974
chr1	205341240	205341563	nearest	-15689	KLHDC8A,ENSG00000162873.14,protein_coding,chr1:205336065-205357090	KLHDC8A	1	12	AGGAATTCACCT	+	8.1368
chr1	202233854	202234417	nearest	40234	LGR6,ENSG00000133067.17,protein_coding,chr1:202193901-202319781	LGR6	1	237	ATCAGCATTCTT	-	7.84997
chr1	202063084	202063644	nearest	55419	ELF3,ENSG00000163435.15,protein_coding,chr1:202007945-202017188	ELF3	1	21	TGGAATGTAAAT	+	8.45113
chr1	202034701	202035169	nearest	26990	ELF3,ENSG00000163435.15,protein_coding,chr1:202007945-202017188	ELF3	1	-111	AGGAATGTGCCC	+	9.2889
chr1	202008011	202008675	nearest	398	ELF3,ENSG00000163435.15,protein_coding,chr1:202007945-202017188	ELF3	1	-2	TCCCACATTCCT	-	9.2271
chr1	199956110	199956371	nearest	-71362	NR5A2,ENSG00000116833.13,protein_coding,chr1:200027602-200177424	NR5A2	1	57	GCCAGCATTCTA	-	7.8218
chr1	197356867	197357188	nearest	88823	CRB1,ENSG00000134376.14,protein_coding,chr1:197268204-197478455	CRB1	1	160	TTCAGAATTCCT	-	7.90834
chr1	197327866	197328055	nearest	59756	CRB1,ENSG00000134376.14,protein_coding,chr1:197268204-197478455	CRB1	1	-76	AGGAATTCTGCT	+	8.71727
chr1	190443535	190443869	nearest	-34702	BRINP3,ENSG00000162670.10,protein_coding,chr1:190097662-190478404	BRINP3	1	-75	CTCTGCATTCCC	-	8.76033
chr1	186916988	186917414	nearest	88248	PLA2G4A,ENSG00000116711.9,protein_coding,chr1:186828953-186988981	PLA2G4A	1	-33	GGCTACATTCCA	-	10.471
chr1	186837216	186837385	nearest	8347	PLA2G4A,ENSG00000116711.9,protein_coding,chr1:186828953-186988981	PLA2G4A	1	-33	AGGAATGCGTGA	+	8.53468
chr1	186828651	186829090	nearest	-83	PLA2G4A,ENSG00000116711.9,protein_coding,chr1:186828953-186988981	PLA2G4A	1	-118	TGGAATTTAGGA	+	7.93313
chr1	173669458	173669980	nearest	-143	ANKRD45,ENSG00000183831.6,protein_coding,chr1:173609561-173669862	ANKRD45	1	-114	GCCTGAATTCCC	-	7.82069
chr1	170630891	170631654	nearest	-31456	PRRX1,ENSG00000116132.11,protein_coding,chr1:170662728-170739419	PRRX1	1	-330	GCCCGAATTCCT	-	8.20841
chr1	164602788	164603114	nearest	47367	PBX1,ENSG00000185630.18,protein_coding,chr1:164555584-164899296	PBX1	1	-118	TGGAATGTTTGC	+	8.40517
chr1	164598369	164598644	nearest	42922	PBX1,ENSG00000185630.18,protein_coding,chr1:164555584-164899296	PBX1	1	112	TGGTAAATTCCT	-	8.00114
chr1	164588980	164589378	nearest	33595	PBX1,ENSG00000185630.18,protein_coding,chr1:164555584-164899296	PBX1	1	105	CACAGCATTCCC	-	8.43858
chr1	164565532	164565725	nearest	10044	PBX1,ENSG00000185630.18,protein_coding,chr1:164555584-164899296	PBX1	1	-60	TGGAATGTTGAG	+	8.71735
chr1	160985855	160986029	nearest	31143	ITLN2,ENSG00000158764.6,protein_coding,chr1:160945025-160954799	ITLN2	1	34	AGGAATGTTACA	+	9.07765
chr1	160400206	160400851	nearest	-58	VANGL2,ENSG00000162738.5,protein_coding,chr1:160400586-160428678	VANGL2	1	-215	CGAGGCATTCCC	-	7.88759
chr1	158999432	159000331	nearest	-87	IFI16,ENSG00000163565.18,protein_coding,chr1:158999968-159055155	IFI16	1	103	ACATGCATTCCC	-	8.16356
chr1	158154564	158154899	nearest	-25216	CD1D,ENSG00000158473.6,protein_coding,chr1:158179947-158184896	CD1D	1	-35	TGGTACATTCCT	-	9.44008
chr1	158125013	158125404	nearest	-54739	CD1D,ENSG00000158473.6,protein_coding,chr1:158179947-158184896	CD1D	1	17	AAGAATGTAGGC	+	8.46675
chr1	158102163	158103294	nearest	-77219	CD1D,ENSG00000158473.6,protein_coding,chr1:158179947-158184896	CD1D	1	-385	AGGAATGCAGGT	+	9.81513
chr1	158102163	158103294	nearest	-77219	CD1D,ENSG00000158473.6,protein_coding,chr1:158179947-158184896	CD1D	1	-321	AGGAATTTATCC	+	8.52794
chr1	158102163	158103294	nearest	-77219	CD1D,ENSG00000158473.6,protein_coding,chr1:158179947-158184896	CD1D	1	37	TGGAATGTCAGC	+	7.87675
chr1	157235364	157235716	nearest	97066	ETV3,ENSG00000117036.11,protein_coding,chr1:157121191-157138474	ETV3	1	-43	TGGAATTCAGAA	+	8.05755
chr1	157235364	157235716	nearest	97066	ETV3,ENSG00000117036.11,protein_coding,chr1:157121191-157138474	ETV3	1	113	CCAGACATTCCT	-	7.81092
chr1	157178447	157178772	nearest	40135	ETV3,ENSG00000117036.11,protein_coding,chr1:157121191-157138474	ETV3	1	39	CAATACATTCCC	-	7.96466
chr1	157163351	157163973	nearest	25188	ETV3,ENSG00000117036.11,protein_coding,chr1:157121191-157138474	ETV3	1	-219	AGCTACATTCCT	-	10.4938
chr1	157161978	157162562	nearest	23796	ETV3,ENSG00000117036.11,protein_coding,chr1:157121191-157138474	ETV3	1	-227	AGGAATGTCTGG	+	7.81092
chr1	157161978	157162562	nearest	23796	ETV3,ENSG00000117036.11,protein_coding,chr1:157121191-157138474	ETV3	1	176	GCCTGAATTCCA	-	8.35338
chr1	157132146	157132986	nearest	-5908	ETV3,ENSG00000117036.11,protein_coding,chr1:157121191-157138474	ETV3	1	413	ATCAGCATTCTT	-	7.84997
chr1	157132146	157132986	nearest	-5908	ETV3,ENSG00000117036.11,protein_coding,chr1:157121191-157138474	ETV3	1	173	AGATGCATTCCA	-	9.49395
chr1	156181578	156182327	nearest	-11980	SLC25A44,ENSG00000160785.13,protein_coding,chr1:156193932-156212796	SLC25A44	1	25	TGGAATGTCTCA	+	8.50469
chr1	156123331	156124001	nearest	-23700	SEMA4A,ENSG00000196189.12,protein_coding,chr1:156147366-156177752	SEMA4A	1	-299	TGGAATGCAGTG	+	9.42789
chr1	156115956	156116418	nearest	-31179	SEMA4A,ENSG00000196189.12,protein_coding,chr1:156147366-156177752	SEMA4A	1	-162	AGGAATGCAAGG	+	8.65216
chr1	154352640	154353720	nearest	27627	ATP8B2,ENSG00000143515.16,protein_coding,chr1:154325553-154351307	ATP8B2	1	-67	TGGAATGCTGAA	+	9.03988
chr1	154352640	154353720	nearest	27627	ATP8B2,ENSG00000143515.16,protein_coding,chr1:154325553-154351307	ATP8B2	1	-104	CGGAACATTCCA	-	8.4726
chr1	154342921	154344016	nearest	17915	ATP8B2,ENSG00000143515.16,protein_coding,chr1:154325553-154351307	ATP8B2	1	314	TGGAATGTGGCA	+	9.7174
chr1	149093001	149093557	nearest	-10282	NBPF9,ENSG00000269713.7,protein_coding,chr1:149054027-149103561	NBPF9	1	50	CGAGACATTCCA	-	8.30122
chr1	148137877	148138894	nearest	-13937	NBPF11,ENSG00000263956.5,protein_coding,chr1:148102046-148152322	NBPF11	1	-100	CGAGACATTCCA	-	8.30122
chr1	147240203	147240672	nearest	-2204	CHD1L,ENSG00000131778.17,protein_coding,chr1:147242641-147295766	CHD1L	1	176	TGGAATGTCTCG	+	8.30122
chr1	117268666	117269525	nearest	58135	VTCN1,ENSG00000134258.16,protein_coding,chr1:117143587-117210960	VTCN1	1	19	AAGAATGTGGCT	+	8.52749
chr1	117268666	117269525	nearest	58135	VTCN1,ENSG00000134258.16,protein_coding,chr1:117143587-117210960	VTCN1	1	99	TGGAATGCTGCC	+	10.1334
chr1	117210867	117211108	nearest	27	VTCN1,ENSG00000134258.16,protein_coding,chr1:117143587-117210960	VTCN1	1	43	TGCAGAATTCCC	-	7.86058
chr1	114058326	114058857	nearest	79200	OLFML3,ENSG00000116774.11,protein_coding,chr1:113979391-114035572	OLFML3	1	79	TGGAATGTCTCG	+	8.30122
chr1	114036944	114037464	nearest	57813	OLFML3,ENSG00000116774.11,protein_coding,chr1:113979391-114035572	OLFML3	1	4	GATGACATTCCA	-	8.01698
chr1	113979179	113979676	nearest	36	OLFML3,ENSG00000116774.11,protein_coding,chr1:113979391-114035572	OLFML3	1	-45	GAAAGCATTCCA	-	8.66445
chr1	113147998	113148322	nearest	74951	LRIG2,ENSG00000198799.11,protein_coding,chr1:113073209-113132260	LRIG2	1	93	AGGAATGCCACA	+	8.79972
chr1	113129649	113129995	nearest	56613	LRIG2,ENSG00000198799.11,protein_coding,chr1:113073209-113132260	LRIG2	1	-137	AGGAATGTTGCA	+	10.0206
chr1	113072596	113073760	nearest	-31	LRIG2,ENSG00000198799.11,protein_coding,chr1:113073209-113132260	LRIG2	1	383	TGCCGCATTCCT	-	10.1439
chr1	113042543	113043308	nearest	-30284	LRIG2,ENSG00000198799.11,protein_coding,chr1:113073209-113132260	LRIG2	1	-299	AGGAATGAAGGC	+	8.20938
chr1	113042543	113043308	nearest	-30284	LRIG2,ENSG00000198799.11,protein_coding,chr1:113073209-113132260	LRIG2	1	39	TGTTAAATTCCT	-	8.09533
chr1	110870794	110871287	nearest	-2114	CD53,ENSG00000143119.12,protein_coding,chr1:110873154-110899928	CD53	1	-149	AGGAATGCCTGT	+	8.15004
chr1	110267300	110267606	nearest	56110	KCNC4,ENSG00000116396.13,protein_coding,chr1:110211343-110283100	KCNC4	1	10	CCGTACATTCCA	-	8.13152
chr1	110202997	110203257	nearest	-8216	KCNC4,ENSG00000116396.13,protein_coding,chr1:110211343-110283100	KCNC4	1	-65	TGGAATGATGCT	+	7.95847
chr1	108517510	108518369	nearest	-42150	FAM102B,ENSG00000162636.15,protein_coding,chr1:108560089-108644900	FAM102B	1	-39	AGGAATGCCTCT	+	8.94774
chr1	108517510	108518369	nearest	-42150	FAM102B,ENSG00000162636.15,protein_coding,chr1:108560089-108644900	FAM102B	1	24	TGGAATGTCTCG	+	8.30122
chr1	100785799	100786161	nearest	66238	VCAM1,ENSG00000162692.10,protein_coding,chr1:100719742-100739045	VCAM1	1	-58	AGGAATGCTAGT	+	8.41561
chr1	99849481	99850544	nearest	-72	AGL,ENSG00000162688.15,protein_coding,chr1:99850084-99924023	AGL	1	412	AGGAATGCCGCT	+	9.75922
chr1	99843903	99844104	nearest	-6081	AGL,ENSG00000162688.15,protein_coding,chr1:99850084-99924023	AGL	1	72	GGAGGCATTCCT	-	9.23233
chr1	99836052	99836694	nearest	-13711	AGL,ENSG00000162688.15,protein_coding,chr1:99850084-99924023	AGL	1	-117	AGGTACATTCCA	-	9.14928
chr1	94579868	94580406	nearest	38337	F3,ENSG00000117525.13,protein_coding,chr1:94529225-94541800	F3	1	-92	TCAGGCATTCCA	-	7.82604
chr1	94528404	94528667	nearest	-13265	F3,ENSG00000117525.13,protein_coding,chr1:94529225-94541800	F3	1	43	AACTACATTCTA	-	8.01499
chr1	78033758	78034144	nearest	54409	GIPC2,ENSG00000137960.5,protein_coding,chr1:77979542-78138449	GIPC2	1	55	TGGAATGCATGT	+	8.69625
chr1	78004032	78005032	nearest	24990	GIPC2,ENSG00000137960.5,protein_coding,chr1:77979542-78138449	GIPC2	1	-84	AGGAATTTTGAA	+	7.78927
chr1	77983075	77983732	nearest	3861	GIPC2,ENSG00000137960.5,protein_coding,chr1:77979542-78138449	GIPC2	1	-84	CGAGACATTCCA	-	8.30122
chr1	68276505	68276754	nearest	43509	WLS,ENSG00000116729.13,protein_coding,chr1:68098473-68233120	WLS	1	62	TGGAATTTGGCT	+	8.29506
chr1	68218615	68218812	nearest	-14407	WLS,ENSG00000116729.13,protein_coding,chr1:68098473-68233120	WLS	1	45	AGGAATGTGCGA	+	8.19001
chr1	65193158	65193391	nearest	45725	AK4,ENSG00000162433.14,protein_coding,chr1:65147549-65232145	AK4	1	31	AGGAATGCTATC	+	8.84043
chr1	65145513	65145663	nearest	-1961	AK4,ENSG00000162433.14,protein_coding,chr1:65147549-65232145	AK4	1	-29	GATGACATTCCA	-	8.01698
chr1	65139932	65140492	nearest	-7337	AK4,ENSG00000162433.14,protein_coding,chr1:65147549-65232145	AK4	1	101	TGGAATGTCTCG	+	8.30122
chr1	65137155	65137632	nearest	-10156	AK4,ENSG00000162433.14,protein_coding,chr1:65147549-65232145	AK4	1	-19	GATGACATTCCA	-	8.01698
chr1	64951457	64951773	nearest	-14889	JAK1,ENSG00000162434.11,protein_coding,chr1:64833229-64966504	JAK1	1	-73	GTATACATTCCA	-	8.86714
chr1	64935839	64936138	nearest	-30516	JAK1,ENSG00000162434.11,protein_coding,chr1:64833229-64966504	JAK1	1	-110	AGGAATGCTGGA	+	9.34191
chr1	64917445	64917796	nearest	-48884	JAK1,ENSG00000162434.11,protein_coding,chr1:64833229-64966504	JAK1	1	160	CAGCACATTCCT	-	8.12678
chr1	64917445	64917796	nearest	-48884	JAK1,ENSG00000162434.11,protein_coding,chr1:64833229-64966504	JAK1	1	-1	GACCAAATTCCT	-	8.22958
chr1	64915778	64916179	nearest	-50526	JAK1,ENSG00000162434.11,protein_coding,chr1:64833229-64966504	JAK1	1	5	AGGAATGTGACC	+	9.38309
chr1	58704589	58705248	nearest	4826	MYSM1,ENSG00000162601.9,protein_coding,chr1:58654739-58700092	MYSM1	1	-44	AAGAATGCAACC	+	8.44061
chr1	55071510	55071800	nearest	32107	PCSK9,ENSG00000169174.10,protein_coding,chr1:55039548-55064852	PCSK9	1	59	ACTCACATTCCA	-	7.9934
chr1	52403671	52405096	nearest	-76	ORC1,ENSG00000085840.12,protein_coding,chr1:52372829-52404459	ORC1	1	-404	AGGAATGCTCCT	+	9.11912
chr1	52119303	52120160	nearest	-22363	ZFYVE9,ENSG00000157077.14,protein_coding,chr1:52142094-52346686	ZFYVE9	1	-135	ATCGGCATTCCC	-	8.12679
chr1	52006358	52006954	nearest	15892	RAB3B,ENSG00000169213.6,protein_coding,chr1:51907956-51990764	RAB3B	1	42	AGGAATGCCTCT	+	8.94774
chr1	52006358	52006954	nearest	15892	RAB3B,ENSG00000169213.6,protein_coding,chr1:51907956-51990764	RAB3B	1	104	TGGAATGTCTCG	+	8.30122
chr1	51970248	51970642	nearest	-20319	RAB3B,ENSG00000169213.6,protein_coding,chr1:51907956-51990764	RAB3B	1	181	AGGAATTTAACT	+	8.11193
chr1	45522731	45523086	nearest	-139	PRDX1,ENSG00000117450.13,protein_coding,chr1:45511036-45523047	PRDX1	1	104	AGGAATGTAAGC	+	9.03776
chr1	45513928	45514208	nearest	-8979	PRDX1,ENSG00000117450.13,protein_coding,chr1:45511036-45523047	PRDX1	1	-48	TGGAATGTCTCA	+	8.50469
chr1	44793541	44794021	nearest	6076	BEST4,ENSG00000142959.4,protein_coding,chr1:44783585-44787705	BEST4	1	-42	ACGTACATTCCC	-	7.81889
chr1	40708781	40709861	nearest	17751	NFYC,ENSG00000066136.19,protein_coding,chr1:40691570-40771603	NFYC	1	396	CTTTACATTCCA	-	8.23107
chr1	40708781	40709861	nearest	17751	NFYC,ENSG00000066136.19,protein_coding,chr1:40691570-40771603	NFYC	1	164	GTGGACATTCCA	-	7.78793
chr1	37682392	37682632	nearest	-9737	C1orf109,ENSG00000116922.14,protein_coding,chr1:37681570-37692249	C1orf109	1	-106	AGGAATGTGGCA	+	10.0248
chr1	34681549	34681790	nearest	-73378	GJB5,ENSG00000189280.3,protein_coding,chr1:34755047-34758512	GJB5	1	14	GGGAATGCAGGC	+	9.25962
chr1	28653952	28654155	nearest	10968	TAF12,ENSG00000120656.11,protein_coding,chr1:28589323-28643085	TAF12	1	15	GGCAGCATTCCT	-	10.4408
chr1	28648089	28649507	nearest	5713	TAF12,ENSG00000120656.11,protein_coding,chr1:28589323-28643085	TAF12	1	-357	GGACAAATTCCA	-	7.76817
chr1	27012666	27013398	nearest	196	FAM46B,ENSG00000158246.7,protein_coding,chr1:27005020-27012836	FAM46B	1	23	GGCTGAATTCCC	-	8.61839
chr1	27011134	27011369	nearest	-1585	FAM46B,ENSG00000158246.7,protein_coding,chr1:27005020-27012836	FAM46B	1	-103	AGGAATGCCTCG	+	8.72768
chr1	26190260	26190744	nearest	-59	CATSPER4,ENSG00000188782.7,protein_coding,chr1:26190561-26202968	CATSPER4	1	15	TAGAATGCAGAC	+	8.28378
chr1	25910679	25911030	nearest	3863	STMN1,ENSG00000117632.20,protein_coding,chr1:25884181-25906991	STMN1	1	16	TGGAATGTCATC	+	8.01698
chr1	25610042	25610241	nearest	-7327	MAN1C1,ENSG00000117643.14,protein_coding,chr1:25617468-25786207	MAN1C1	1	15	TGCAACATTCCA	-	9.71316
chr1	25587924	25588729	nearest	-29142	MAN1C1,ENSG00000117643.14,protein_coding,chr1:25617468-25786207	MAN1C1	1	-22	AGGAATGCCTCT	+	8.94774
chr1	25587924	25588729	nearest	-29142	MAN1C1,ENSG00000117643.14,protein_coding,chr1:25617468-25786207	MAN1C1	1	41	TGGAATGTCTCA	+	8.50469
chr1	23875459	23875733	nearest	7302	FUCA1,ENSG00000179163.11,protein_coding,chr1:23845077-23868294	FUCA1	1	16	CCCAGCATTCCT	-	9.13845
chr1	22685607	22685938	nearest	-25067	EPHB2,ENSG00000133216.16,protein_coding,chr1:22710839-22921500	EPHB2	1	142	CAGTGCATTCCC	-	7.85811
chr1	20575257	20575913	nearest	-13363	CDA,ENSG00000158825.5,protein_coding,chr1:20588948-20618908	CDA	1	-139	TGGAATGTTGTT	+	9.07228
chr1	19974783	19975095	nearest	-5477	PLA2G2A,ENSG00000188257.10,protein_coding,chr1:19975431-19980416	PLA2G2A	1	-42	AAGAGCATTCCA	-	8.15425
chr1	18407363	18407535	nearest	-73533	KLHDC7A,ENSG00000179023.8,protein_coding,chr1:18480982-18486126	KLHDC7A	1	-75	GCCCGCATTCCA	-	9.33995
chr1	17706868	17707205	nearest	-48277	ACTL8,ENSG00000117148.7,protein_coding,chr1:17755313-17827063	ACTL8	1	30	GCGTGCATTCCA	-	8.75523
chr1	17606939	17607279	nearest	67274	ARHGEF10L,ENSG00000074964.16,protein_coding,chr1:17539835-17697874	ARHGEF10L	1	2	TGTTTCATTCCT	-	7.76299
chr1	17569943	17570158	nearest	30215	ARHGEF10L,ENSG00000074964.16,protein_coding,chr1:17539835-17697874	ARHGEF10L	1	74	TTCTGCATTCCT	-	9.80389
chr1	12049099	12049379	nearest	-14138	TNFRSF8,ENSG00000120949.14,protein_coding,chr1:12063377-12144207	TNFRSF8	1	-6	AGGAATGCACAC	+	9.06799
