# Supplementary material for: Derivation of trophoblast stem cells from naïve human pluripotent stem cells
Source: eLife journal article supplement (doi:10.7554/elife.52504), 2020-02-12
Supplement: supp [file elife-52504-supp-v1.zip › elife_poa_e52504_Supplementary_file_6.xlsx]

## Sheet: TEAD4_motif_in_OCR_around_DEGs
Chr	Start	End	Distance to nearest gene TSS	Nearest Gene	Gene_ID	DEG_cluster
chr9	134602430	134603370	-38873	COL5A1,ENSG00000130635.15,chr9:134641774-134844843	COL5A1	1
chr9	127780415	127781215	2073	SH2D3C,ENSG00000095370.19,chr9:127738317-127778741	SH2D3C	1
chr9	77712606	77713189	64589	GNA14,ENSG00000156049.6,chr9:77423079-77648307	GNA14	1
chr7	100055288	100056642	6192	ZSCAN21,ENSG00000166529.14,chr7:100049774-100065038	ZSCAN21	1
chr7	94333682	94334288	-60575	COL1A2,ENSG00000164692.17,chr7:94394561-94431232	COL1A2	1
chr7	80942221	80942761	20131	SEMA3C,ENSG00000075223.13,chr7:80742538-80922359	SEMA3C	1
chr7	22091500	22092220	145775	CDCA7L,ENSG00000164649.19,chr7:21900900-21946084	CDCA7L	1
chr7	6443435	6443971	-40488	DAGLB,ENSG00000164535.14,chr7:6409126-6484190	DAGLB	1
chr6	151446096	151446727	-5771	RMND1,ENSG00000155906.16,chr6:151404763-151452181	RMND1	1
chr6	107083904	107084629	-31004	BEND3,ENSG00000178409.13,chr6:107065182-107115269	BEND3	1
chr6	75183068	75183667	-22685	COL12A1,ENSG00000111799.20,chr6:75084326-75206051	COL12A1	1
chr6	36124814	36125199	-2802	MAPK13,ENSG00000156711.16,chr6:36127809-36144524	MAPK13	1
chr6	36122089	36122769	-5379	MAPK13,ENSG00000156711.16,chr6:36127809-36144524	MAPK13	1
chr6	21738158	21738806	73711	CASC15,ENSG00000272168.5,chr6:21664772-22214505	CASC15	1
chr5	176994500	176995431	-27669	UIMC1,ENSG00000087206.16,chr5:176905005-177022633	UIMC1	1
chr5	150642639	150643927	-17590	MYOZ3,ENSG00000164591.13,chr5:150660874-150679365	MYOZ3	1
chr5	102226172	102226769	-70080	SLCO4C1,ENSG00000173930.8,chr5:102233986-102296549	SLCO4C1	1
chr5	81800817	81801171	49196	SSBP2,ENSG00000145687.15,chr5:81413021-81751797	SSBP2	1
chr4	153119432	153120002	-32624	TRIM2,ENSG00000109654.14,chr4:153152342-153339320	TRIM2	1
chr4	107350985	107352432	67901	DKK2,ENSG00000155011.8,chr4:106921802-107283806	DKK2	1
chr4	75718541	75718922	-5795	G3BP2,ENSG00000138757.14,chr4:75642782-75724525	G3BP2	1
chr4	40198008	40198663	7283	RHOH,ENSG00000168421.12,chr4:40191053-40246967	RHOH	1
chr4	16065042	16065506	-19105	PROM1,ENSG00000007062.11,chr4:15963076-16084378	PROM1	1
chr3	141081270	141081773	30120	SPSB4,ENSG00000175093.4,chr3:141051402-141148611	SPSB4	1
chr3	141056202	141056984	5192	SPSB4,ENSG00000175093.4,chr3:141051402-141148611	SPSB4	1
chr3	134597488	134597999	-57	EPHB1,ENSG00000154928.16,chr3:134597801-135260467	EPHB1	1
chr3	129908432	129908861	14776	TMCC1-AS1,ENSG00000271270.5,chr3:129893871-129918575	TMCC1-AS1	1
chr3	124834626	124835356	-28327	ENO1P3,ENSG00000243986.2,chr3:124862094-124863317	ENO1P3	1
chr3	119571133	119571561	-7920	ADPRH,ENSG00000144843.11,chr3:119579268-119589945	ADPRH	1
chr3	13592875	13593732	44173	FBLN2,ENSG00000163520.13,chr3:13549131-13638422	FBLN2	1
chr3	13540314	13541427	-8260	FBLN2,ENSG00000163520.13,chr3:13549131-13638422	FBLN2	1
chr3	13539300	13539597	-9682	FBLN2,ENSG00000163520.13,chr3:13549131-13638422	FBLN2	1
chr22	40728784	40729449	50367	MCHR1,ENSG00000128285.4,chr22:40678750-40682814	MCHR1	1
chr22	27845017	27845808	43913	MN1,ENSG00000169184.5,chr22:27748277-27801498	MN1	1
chr22	24196446	24197039	15484	SUSD2,ENSG00000099994.10,chr22:24181259-24189110	SUSD2	1
chr22	24142185	24142614	-38859	SUSD2,ENSG00000099994.10,chr22:24181259-24189110	SUSD2	1
chr21	34162956	34163544	5527	LINC00310,ENSG00000227456.7,chr21:34157724-34190244	LINC00310	1
chr20	36117141	36117847	25991	EPB41L1,ENSG00000088367.20,chr20:36091504-36232799	EPB41L1	1
chr20	19945865	19946830	59827	RIN2,ENSG00000132669.12,chr20:19886521-20002457	RIN2	1
chr2	236607291	236608481	40100	ACKR3,ENSG00000144476.5,chr2:236567787-236582358	ACKR3	1
chr2	207791421	207791945	22119	FZD5,ENSG00000163251.3,chr2:207762586-207769563	FZD5	1
chr2	207784673	207785317	15431	FZD5,ENSG00000163251.3,chr2:207762586-207769563	FZD5	1
chr2	205605480	205606291	-76104	NRP2,ENSG00000118257.16,chr2:205681990-205798133	NRP2	1
chr2	205568502	205569067	-113205	NRP2,ENSG00000118257.16,chr2:205681990-205798133	NRP2	1
chr2	151522419	151523009	112832	RIF1,ENSG00000080345.17,chr2:151409883-151508013	RIF1	1
chr2	47698472	47699216	3315	MSH6,ENSG00000116062.14,chr2:47695530-47810101	MSH6	1
chr2	31360298	31361180	-53977	XDH,ENSG00000158125.9,chr2:31334321-31414715	XDH	1
chr19	38338990	38339589	3515	CATSPERG,ENSG00000099338.22,chr19:38335775-38370943	CATSPERG	1
chr19	15250028	15250891	17023	EPHX3,ENSG00000105131.7,chr19:15226919-15233435	EPHX3	1
chr17	64442808	64443556	-5854	MILR1,ENSG00000271605.5,chr17:64449037-64468643	MILR1	1
chr17	15963623	15964426	19108	ADORA2B,ENSG00000170425.3,chr17:15944917-15975746	ADORA2B	1
chr16	68798303	68798916	-23977	FTLP14,ENSG00000260459.2,chr16:68822587-68823070	FTLP14	1
chr16	68790105	68790559	-32254	FTLP14,ENSG00000260459.2,chr16:68822587-68823070	FTLP14	1
chr16	68031023	68031441	7789	DDX28,ENSG00000182810.6,chr16:68021274-68023442	DDX28	1
chr16	2370566	2371308	30190	ABCA3,ENSG00000167972.13,chr16:2275881-2340746	ABCA3	1
chr14	100371812	100372144	-4439	WDR25,ENSG00000176473.13,chr14:100376418-100530303	WDR25	1
chr14	92926097	92927436	3687	CHGA,ENSG00000100604.12,chr14:92923080-92935293	CHGA	1
chr12	122096377	122097163	18049	MLXIP,ENSG00000175727.13,chr12:122078722-122147347	MLXIP	1
chr12	122090891	122091513	12481	MLXIP,ENSG00000175727.13,chr12:122078722-122147347	MLXIP	1
chr12	120286667	120287169	4616	NME2P1,ENSG00000123009.4,chr12:120282303-120282716	NME2P1	1
chr12	47950854	47951327	8041	VDR,ENSG00000111424.10,chr12:47841537-47943048	VDR	1
chr12	6988053	6988556	46	C1S,ENSG00000182326.14,chr12:6988259-7071032	C1S	1
chr11	46657589	46658357	40063	HARBI1,ENSG00000180423.4,chr11:46602861-46617909	HARBI1	1
chr11	35173107	35173547	34458	CD44,ENSG00000026508.16,chr11:35138870-35232402	CD44	1
chr1	160949076	160949759	-5383	ITLN2,ENSG00000158764.6,chr1:160945025-160954799	ITLN2	1
chr1	117210738	117211408	112	VTCN1,ENSG00000134258.16,chr1:117143587-117210960	VTCN1	1
chr1	112862817	112863329	12429	LINC01356,ENSG00000215866.7,chr1:112820170-112850643	LINC01356	1
chr1	108553748	108554349	-6040	FAM102B,ENSG00000162636.15,chr1:108560089-108644900	FAM102B	1
chr1	94562781	94563513	21346	F3,ENSG00000117525.13,chr1:94529225-94541800	F3	1
chr1	27008077	27008557	-4520	FAM46B,ENSG00000158246.7,chr1:27005020-27012836	FAM46B	1
chr1	17497773	17498625	-41635	ARHGEF10L,ENSG00000074964.16,chr1:17539835-17697874	ARHGEF10L	1
chr9	136015425	136015941	54302	UBAC1,ENSG00000130560.8,chr9:135932969-135961380	UBAC1	2
chr9	136014408	136015177	53411	UBAC1,ENSG00000130560.8,chr9:135932969-135961380	UBAC1	2
chr9	135945874	135946604	-15142	UBAC1,ENSG00000130560.8,chr9:135932969-135961380	UBAC1	2
chr9	133387390	133388265	11461	STKLD1,ENSG00000198870.7,chr9:133376367-133406096	STKLD1	2
chr9	105243033	105243419	-1395	SLC44A1,ENSG00000070214.15,chr9:105244622-105439171	SLC44A1	2
chr9	97046068	97046690	6735	CTSV,ENSG00000136943.10,chr9:97029679-97039643	CTSV	2
chr9	2027539	2028118	12610	SMARCA2,ENSG00000080503.19,chr9:2015219-2193624	SMARCA2	2
chr8	127748082	127748434	12825	MYC,ENSG00000136997.14,chr8:127735434-127741434	MYC	2
chr8	107508603	107509531	11011	ANGPT1,ENSG00000154188.9,chr8:107249482-107498055	ANGPT1	2
chr8	65794905	65795737	-47002	PDE7A,ENSG00000205268.10,chr8:65717510-65842322	PDE7A	2
chr8	47323385	47323897	63067	SPIDR,ENSG00000164808.16,chr8:47260575-47736306	SPIDR	2
chr8	28393245	28393807	-9176	ZNF395,ENSG00000186918.13,chr8:28345585-28402701	ZNF395	2
chr8	23421952	23422622	-3042	LOXL2,ENSG00000134013.15,chr8:23297189-23425328	LOXL2	2
chr8	22352610	22353242	-14322	SLC39A14,ENSG00000104635.13,chr8:22367249-22434129	SLC39A14	2
chr7	135562602	135563305	5035	NUP205,ENSG00000155561.14,chr7:135557919-135648757	NUP205	2
chr7	127551801	127552432	-36228	ARF5,ENSG00000004059.10,chr7:127588345-127591705	ARF5	2
chr7	29113317	29114556	-8337	CHN2,ENSG00000106069.20,chr7:29122274-29514328	CHN2	2
chr7	22703107	22703958	-22351	IL6,ENSG00000136244.11,chr7:22725884-22732002	IL6	2
chr6	3246389	3248080	15503	TUBB2B,ENSG00000137285.9,chr6:3224261-3231730	TUBB2B	2
chr5	139445448	139445981	1222	DNAJC18,ENSG00000170464.9,chr5:139408588-139444491	DNAJC18	2
chr5	134143951	134144569	29550	TCF7,ENSG00000081059.19,chr5:134114711-134151865	TCF7	2
chr4	184750986	184751586	17152	CENPU,ENSG00000151725.11,chr4:184694618-184734133	CENPU	2
chr4	184748156	184748703	14295	CENPU,ENSG00000151725.11,chr4:184694618-184734133	CENPU	2
chr4	151752912	151753566	-7785	GATB,ENSG00000059691.11,chr4:151670504-151761023	GATB	2
chr4	128794074	128794611	-15280	JADE1,ENSG00000077684.15,chr4:128809623-128875224	JADE1	2
chr4	117135677	117136333	50428	TRAM1L1,ENSG00000174599.5,chr4:117083554-117085576	TRAM1L1	2
chr4	108058534	108059399	69253	HADH,ENSG00000138796.15,chr4:107989714-108035175	HADH	2
chr4	90840880	90841602	2203	TMSB4XP8,ENSG00000187653.11,chr4:90838903-90839037	TMSB4XP8	2
chr4	26223057	26223842	59995	RBPJ,ENSG00000168214.20,chr4:26163455-26435131	RBPJ	2
chr4	26212395	26213711	49599	RBPJ,ENSG00000168214.20,chr4:26163455-26435131	RBPJ	2
chr4	26146694	26147503	-16356	RBPJ,ENSG00000168214.20,chr4:26163455-26435131	RBPJ	2
chr3	187134766	187135252	-45900	RPL39L,ENSG00000163923.9,chr3:187120948-187180908	RPL39L	2
chr3	179546695	179547563	-15750	ACTL6A,ENSG00000136518.16,chr3:179562880-179588408	ACTL6A	2
chr3	128270537	128270934	116820	RUVBL1,ENSG00000175792.11,chr3:128064778-128153914	RUVBL1	2
chr3	128267584	128268334	114044	RUVBL1,ENSG00000175792.11,chr3:128064778-128153914	RUVBL1	2
chr3	128237510	128238380	84030	RUVBL1,ENSG00000175792.11,chr3:128064778-128153914	RUVBL1	2
chr3	58256581	58257587	19579	ABHD6,ENSG00000163686.13,chr3:58237506-58295693	ABHD6	2
chr3	52670642	52671457	-10106	GNL3,ENSG00000163938.16,chr3:52681156-52694492	GNL3	2
chr3	48514407	48515003	9878	SHISA5,ENSG00000164054.15,chr3:48467798-48504826	SHISA5	2
chr22	43126515	43127186	16103	BIK,ENSG00000100290.2,chr22:43110748-43129712	BIK	2
chr22	42726683	42727389	5737	A4GALT,ENSG00000128274.15,chr22:42692121-42721298	A4GALT	2
chr20	41110895	41111451	-25786	PLCG1,ENSG00000124181.14,chr20:41136960-41196801	PLCG1	2
chr20	36497986	36499234	-42873	MYL9,ENSG00000101335.9,chr20:36541484-36551447	MYL9	2
chr20	36478159	36478956	-62926	MYL9,ENSG00000101335.9,chr20:36541484-36551447	MYL9	2
chr2	27414127	27414547	4649	PPM1G,ENSG00000115241.10,chr2:27381194-27409687	PPM1G	2
chr2	9232993	9233366	26415	ASAP2,ENSG00000151693.9,chr2:9206765-9405683	ASAP2	2
chr19	36736105	36736952	-36298	ZNF850,ENSG00000267041.5,chr19:36714383-36772825	ZNF850	2
chr19	10245447	10245967	-6193	MRPL4,ENSG00000105364.13,chr19:10251901-10260045	MRPL4	2
chr19	10244339	10244653	-7404	MRPL4,ENSG00000105364.13,chr19:10251901-10260045	MRPL4	2
chr17	43114059	43114526	-11192	BRCA1,ENSG00000012048.19,chr17:43044295-43125483	BRCA1	2
chr17	32943673	32944175	16015	TMEM98,ENSG00000006042.11,chr17:32927910-32945106	TMEM98	2
chr17	32940716	32941114	13006	TMEM98,ENSG00000006042.11,chr17:32927910-32945106	TMEM98	2
chr17	1769230	1770584	7949	SERPINF1,ENSG00000132386.10,chr17:1761959-1777574	SERPINF1	2
chr16	46736641	46737149	47253	ORC6,ENSG00000091651.8,chr16:46689643-46698394	ORC6	2
chr15	34360182	34360709	-6834	LPCAT4,ENSG00000176454.13,chr15:34358618-34367278	LPCAT4	2
chr14	51195200	51195714	-44704	TMX1,ENSG00000139921.12,chr14:51240162-51257546	TMX1	2
chr11	108616378	108616984	22942	EXPH5,ENSG00000110723.11,chr11:108505431-108593738	EXPH5	2
chr11	108609713	108610162	16198	EXPH5,ENSG00000110723.11,chr11:108505431-108593738	EXPH5	2
chr11	68342475	68343345	30302	LRP5,ENSG00000162337.11,chr11:68312609-68449275	LRP5	2
chr11	63778818	63779482	10374	C11orf95,ENSG00000188070.9,chr11:63759892-63768775	C11orf95	2
chr11	1967782	1968212	20720	MRPL23,ENSG00000214026.10,chr11:1947278-1984522	MRPL23	2
chr10	124459223	124459801	-2321	LHPP,ENSG00000107902.13,chr10:124461834-124617888	LHPP	2
chr10	121579698	121580081	-18570	FGFR2,ENSG00000066468.20,chr10:121478334-121598458	FGFR2	2
chr10	121527668	121528220	-70515	FGFR2,ENSG00000066468.20,chr10:121478334-121598458	FGFR2	2
chr10	121509853	121510784	-88141	FGFR2,ENSG00000066468.20,chr10:121478334-121598458	FGFR2	2
chr10	119522762	119523489	-19584	RGS10,ENSG00000148908.14,chr10:119499828-119542708	RGS10	2
chr10	100506589	100507582	-12780	SEC31B,ENSG00000075826.16,chr10:100486642-100519864	SEC31B	2
chr10	95331506	95332192	40824	PDLIM1,ENSG00000107438.8,chr10:95237572-95291024	PDLIM1	2
chr10	73906433	73907343	-2288	PLAU,ENSG00000122861.15,chr10:73909177-73917497	PLAU	2
chr10	73899083	73899834	-9718	PLAU,ENSG00000122861.15,chr10:73909177-73917497	PLAU	2
chr10	60806990	60807886	29108	CDK1,ENSG00000170312.15,chr10:60778331-60794852	CDK1	2
chr10	42768683	42770147	-13385	BMS1,ENSG00000165733.7,chr10:42782801-42834937	BMS1	2
chr1	232600503	232601502	39443	SIPA1L2,ENSG00000116991.10,chr1:232397965-232561558	SIPA1L2	2
chr1	232542644	232543206	-18634	SIPA1L2,ENSG00000116991.10,chr1:232397965-232561558	SIPA1L2	2
chr1	232529777	232530313	-31514	SIPA1L2,ENSG00000116991.10,chr1:232397965-232561558	SIPA1L2	2
chr1	225228725	225229440	-199844	LBR,ENSG00000143815.14,chr1:225401502-225428925	LBR	2
chr1	156559438	156560335	-12719	IQGAP3,ENSG00000183856.10,chr1:156525405-156572604	IQGAP3	2
chr1	113311933	113312810	-78377	MAGI3,ENSG00000081026.18,chr1:113390749-113685923	MAGI3	2
chr1	67439199	67439875	9121	SERBP1,ENSG00000142864.14,chr1:67407810-67430415	SERBP1	2
chr9	128271136	128271762	-3929	SWI5,ENSG00000175854.11,chr9:128275379-128288990	SWI5	3
chr9	113387017	113387452	10234	HDHD3,ENSG00000119431.9,chr9:113373419-113376999	HDHD3	3
chr9	107274853	107275438	-7991	RAD23B,ENSG00000119318.12,chr9:107283137-107332194	RAD23B	3
chr9	107249145	107249569	-33779	RAD23B,ENSG00000119318.12,chr9:107283137-107332194	RAD23B	3
chr9	107236051	107236686	-46768	RAD23B,ENSG00000119318.12,chr9:107283137-107332194	RAD23B	3
chr9	96571717	96572168	-47889	CDC14B,ENSG00000081377.16,chr9:96490241-96619830	CDC14B	3
chr9	91825532	91826297	-124249	ROR2,ENSG00000169071.14,chr9:91563091-91950162	ROR2	3
chr9	79567648	79568053	-3922	TLE4,ENSG00000106829.18,chr9:79571773-79726882	TLE4	3
chr9	73131982	73132654	-19438	ANXA1,ENSG00000135046.13,chr9:73151757-73170393	ANXA1	3
chr9	69346657	69347497	22506	FAM189A2,ENSG00000135063.17,chr9:69324572-69392455	FAM189A2	3
chr9	68749506	68750016	-30293	FAM122A,ENSG00000187866.7,chr9:68780055-68784608	FAM122A	3
chr9	33255217	33256170	-9071	BAG1,ENSG00000107262.16,chr9:33247820-33264763	BAG1	3
chr9	5817847	5818756	-14817	ERMP1,ENSG00000099219.13,chr9:5765076-5833117	ERMP1	3
chr8	66721820	66722445	9715	SGK3,ENSG00000104205.12,chr8:66712418-66862022	SGK3	3
chr8	37881811	37882654	-17236	RAB11FIP1,ENSG00000156675.15,chr8:37858618-37899467	RAB11FIP1	3
chr8	20191995	20192531	-5103	ATP6V1B2,ENSG00000147416.10,chr8:20197367-20226819	ATP6V1B2	3
chr8	8851913	8852531	-41424	MFHAS1,ENSG00000147324.10,chr8:8783354-8893645	MFHAS1	3
chr8	615379	615846	69830	TDRP,ENSG00000180190.11,chr8:489792-545781	TDRP	3
chr8	613465	614364	68132	TDRP,ENSG00000180190.11,chr8:489792-545781	TDRP	3
chr8	570837	571922	25597	TDRP,ENSG00000180190.11,chr8:489792-545781	TDRP	3
chr7	155316084	155317520	19027	INSIG1,ENSG00000186480.12,chr7:155297776-155310235	INSIG1	3
chr7	155304963	155305810	7611	INSIG1,ENSG00000186480.12,chr7:155297776-155310235	INSIG1	3
chr7	144819528	144820074	-16595	TPK1,ENSG00000196511.13,chr7:144451941-144836395	TPK1	3
chr7	144796707	144797324	-39381	TPK1,ENSG00000196511.13,chr7:144451941-144836395	TPK1	3
chr7	143906902	143907410	4957	TCAF1,ENSG00000198420.9,chr7:143851375-143902198	TCAF1	3
chr7	135213439	135214302	2335	WDR91,ENSG00000105875.13,chr7:135183839-135211534	WDR91	3
chr7	131585973	131586687	28112	PODXL,ENSG00000128567.16,chr7:131500262-131558217	PODXL	3
chr7	114901621	114902210	-20238	MDFIC,ENSG00000135272.9,chr7:114922154-115019916	MDFIC	3
chr7	112162129	112162622	-44037	DOCK4,ENSG00000128512.19,chr7:111726110-112206411	DOCK4	3
chr7	94949527	94949921	42523	PPP1R9A,ENSG00000158528.11,chr7:94907202-95296415	PPP1R9A	3
chr7	75892371	75893336	-6346	POR,ENSG00000127948.13,chr7:75899200-75986855	POR	3
chr7	74452021	74452927	-1315	GTF2IRD1,ENSG00000006704.10,chr7:74453790-74602604	GTF2IRD1	3
chr7	73791172	73791838	-8036	CLDN4,ENSG00000189143.9,chr7:73799542-73832693	CLDN4	3
chr7	45082828	45083524	-5739	NACAD,ENSG00000136274.8,chr7:45080438-45088914	NACAD	3
chr7	30509251	30509819	4690	GGCT,ENSG00000006625.17,chr7:30496621-30504844	GGCT	3
chr7	25025131	25025658	43759	OSBPL3,ENSG00000070882.12,chr7:24796539-24981634	OSBPL3	3
chr7	20206539	20206989	-10641	MACC1,ENSG00000183742.12,chr7:20134655-20217404	MACC1	3
chr6	158863524	158864328	-6012	C6orf99,ENSG00000203711.11,chr6:158869939-158910353	C6orf99	3
chr6	122772717	122773424	-6404	FABP7,ENSG00000164434.11,chr6:122779475-122784074	FABP7	3
chr6	83685497	83686117	-23885	SNAP91,ENSG00000065609.14,chr6:83552880-83709691	SNAP91	3
chr6	79945101	79945689	-2186	ELOVL4,ENSG00000118402.5,chr6:79914812-79947580	ELOVL4	3
chr6	79628549	79629126	-2445	SH3BGRL2,ENSG00000198478.7,chr6:79631283-79703659	SH3BGRL2	3
chr6	42403398	42404168	-48269	TRERF1,ENSG00000124496.12,chr6:42224931-42452051	TRERF1	3
chr6	39269977	39270549	40812	KCNK5,ENSG00000164626.8,chr6:39188973-39229450	KCNK5	3
chr6	13912408	13913308	-11587	RNF182,ENSG00000180537.12,chr6:13924446-13980302	RNF182	3
chr6	4732806	4733378	26934	CDYL,ENSG00000153046.17,chr6:4706159-4955551	CDYL	3
chr6	3431880	3432983	-24592	SLC22A23,ENSG00000137266.14,chr6:3268962-3457022	SLC22A23	3
chr6	3423848	3424247	-32976	SLC22A23,ENSG00000137266.14,chr6:3268962-3457022	SLC22A23	3
chr5	177095477	177096525	9116	FGFR4,ENSG00000160867.14,chr5:177086886-177098144	FGFR4	3
chr5	174713607	174714150	-10654	MSX2,ENSG00000120149.8,chr5:174724533-174730893	MSX2	3
chr5	174698225	174699345	-25747	MSX2,ENSG00000120149.8,chr5:174724533-174730893	MSX2	3
chr5	174680738	174681697	-43315	MSX2,ENSG00000120149.8,chr5:174724533-174730893	MSX2	3
chr5	145961152	145962269	25132	SH3RF2,ENSG00000156463.17,chr5:145936579-146081791	SH3RF2	3
chr5	138528227	138528570	-14903	ETF1,ENSG00000120705.12,chr5:138506095-138543300	ETF1	3
chr5	128565162	128566910	28024	SLC27A6,ENSG00000113396.12,chr5:128538013-129033642	SLC27A6	3
chr5	128532048	128532492	-5742	SLC27A6,ENSG00000113396.12,chr5:128538013-129033642	SLC27A6	3
chr5	52963622	52964401	-25314	ITGA2,ENSG00000164171.10,chr5:52989326-53094779	ITGA2	3
chr5	41526797	41527927	16733	PLCXD3,ENSG00000182836.9,chr5:41306954-41510628	PLCXD3	3
chr5	34770513	34771440	-67856	TTC23L,ENSG00000205838.12,chr5:34838833-34899456	TTC23L	3
chr4	182929292	182929995	11706	DCTD,ENSG00000129187.14,chr4:182890060-182917936	DCTD	3
chr4	61204400	61204734	3310	ADGRL3,ENSG00000150471.15,chr4:61201258-62078335	ADGRL3	3
chr4	40613446	40613829	-17239	RBM47,ENSG00000163694.14,chr4:40423267-40630875	RBM47	3
chr4	40587540	40588314	-42949	RBM47,ENSG00000163694.14,chr4:40423267-40630875	RBM47	3
chr3	184688477	184689211	-23159	MAGEF1,ENSG00000177383.4,chr3:184710367-184712002	MAGEF1	3
chr3	184658231	184659008	-53384	MAGEF1,ENSG00000177383.4,chr3:184710367-184712002	MAGEF1	3
chr3	184657188	184657737	-54541	MAGEF1,ENSG00000177383.4,chr3:184710367-184712002	MAGEF1	3
chr3	171811647	171811889	817	PLD1,ENSG00000075651.15,chr3:171600405-171810950	PLD1	3
chr3	170929356	170930276	21122	EIF5A2,ENSG00000163577.7,chr3:170888415-170908693	EIF5A2	3
chr3	159854469	159855204	14976	SCHIP1,ENSG00000151967.18,chr3:159839861-159897360	SCHIP1	3
chr3	151107218	151108230	22028	MED12L,ENSG00000144893.12,chr3:151085697-151437072	MED12L	3
chr3	151106362	151106701	20835	MED12L,ENSG00000144893.12,chr3:151085697-151437072	MED12L	3
chr3	138452349	138453025	18102	ESYT3,ENSG00000158220.13,chr3:138434586-138481686	ESYT3	3
chr3	134008507	134009233	-43315	SLCO2A1,ENSG00000174640.12,chr3:133932696-134052184	SLCO2A1	3
chr3	133882157	133882777	-13370	RAB6B,ENSG00000154917.10,chr3:133824239-133895836	RAB6B	3
chr3	112074721	112075584	-11182	C3orf52,ENSG00000114529.12,chr3:112086335-112131004	C3orf52	3
chr3	98585308	98586016	-8062	CPOX,ENSG00000080819.6,chr3:98521132-98593723	CPOX	3
chr3	98577135	98577894	-16210	CPOX,ENSG00000080819.6,chr3:98521132-98593723	CPOX	3
chr3	69724780	69725439	-14325	MITF,ENSG00000187098.14,chr3:69739435-69968337	MITF	3
chr3	53269838	53270804	14268	TKT,ENSG00000163931.15,chr3:53224707-53256052	TKT	3
chr3	41274867	41275601	80398	CTNNB1,ENSG00000168036.16,chr3:41194837-41260096	CTNNB1	3
chr3	38358907	38359494	12441	XYLB,ENSG00000093217.9,chr3:38346760-38421348	XYLB	3
chr3	32462300	32463226	-40646	CMTM6,ENSG00000091317.7,chr3:32481312-32503408	CMTM6	3
chr3	20062448	20062809	22606	KAT2B,ENSG00000114166.7,chr3:20040023-20154404	KAT2B	3
chr3	20056800	20057853	17304	KAT2B,ENSG00000114166.7,chr3:20040023-20154404	KAT2B	3
chr3	13433837	13434417	13817	NUP210,ENSG00000132182.11,chr3:13316235-13420309	NUP210	3
chr3	13303040	13303773	-116904	NUP210,ENSG00000132182.11,chr3:13316235-13420309	NUP210	3
chr3	5023216	5023970	43631	BHLHE40-AS1,ENSG00000235831.6,chr3:4896809-4979961	BHLHE40-AS1	3
chr3	3739672	3740670	-59265	LRRN1,ENSG00000175928.5,chr3:3799437-3847703	LRRN1	3
chr22	44747218	44747594	-5151	ARHGAP8,ENSG00000241484.9,chr22:44752558-44862788	ARHGAP8	3
chr22	39345587	39346211	-4025	SYNGR1,ENSG00000100321.14,chr22:39349925-39385588	SYNGR1	3
chr22	32863876	32864450	62463	TIMP3,ENSG00000100234.11,chr22:32801701-32863043	TIMP3	3
chr22	21951549	21952372	-878	PPM1F,ENSG00000100034.13,chr22:21919420-21952837	PPM1F	3
chr21	45515431	45516275	-28559	SLC19A1,ENSG00000173638.18,chr21:45493572-45544411	SLC19A1	3
chr21	44869903	44871013	-3446	PTTG1IP,ENSG00000183255.11,chr21:44849585-44873903	PTTG1IP	3
chr21	41786368	41787053	19603	RIPK4,ENSG00000183421.11,chr21:41739369-41767106	RIPK4	3
chr20	62370026	62370534	2967	LAMA5,ENSG00000130702.13,chr20:62307955-62367312	LAMA5	3
chr20	62361471	62362310	-5423	LAMA5,ENSG00000130702.13,chr20:62307955-62367312	LAMA5	3
chr20	51585988	51586678	23501	NFATC2,ENSG00000101096.19,chr20:51386957-51562831	NFATC2	3
chr20	51511051	51511496	-51559	NFATC2,ENSG00000101096.19,chr20:51386957-51562831	NFATC2	3
chr20	50761197	50762312	30211	PARD6B,ENSG00000124171.8,chr20:50731544-50756795	PARD6B	3
chr20	50507956	50508583	-2051	PTPN1,ENSG00000196396.9,chr20:50510321-50585241	PTPN1	3
chr20	44151509	44152057	-35796	JPH2,ENSG00000149596.6,chr20:44111695-44187578	JPH2	3
chr20	25017313	25017992	24672	APMAP,ENSG00000101474.11,chr20:24962925-24992979	APMAP	3
chr20	23642348	23642870	4135	CST3,ENSG00000101439.8,chr20:23626706-23638473	CST3	3
chr20	13029751	13030560	21177	SPTLC3,ENSG00000172296.12,chr20:13008979-13169103	SPTLC3	3
chr2	235458862	235459246	-35034	AGAP1,ENSG00000157985.17,chr2:235494089-236131800	AGAP1	3
chr2	234518844	234519548	22142	ARL4C,ENSG00000188042.7,chr2:234493041-234497053	ARL4C	3
chr2	233356385	233357110	2241	DGKD,ENSG00000077044.9,chr2:233354507-233472104	DGKD	3
chr2	227721540	227722079	3796	SLC19A3,ENSG00000135917.13,chr2:227685210-227718012	SLC19A3	3
chr2	217994486	217995241	-8133	TNS1,ENSG00000079308.16,chr2:217799789-218002995	TNS1	3
chr2	191660520	191661261	-17177	NABP1,ENSG00000173559.12,chr2:191678068-191696659	NABP1	3
chr2	191635523	191636492	-42060	NABP1,ENSG00000173559.12,chr2:191678068-191696659	NABP1	3
chr2	191582325	191582743	-95533	NABP1,ENSG00000173559.12,chr2:191678068-191696659	NABP1	3
chr2	190418603	190419564	10729	MFSD6,ENSG00000151690.14,chr2:190408355-190509205	MFSD6	3
chr2	174442599	174443150	-44221	GPR155,ENSG00000163328.13,chr2:174431571-174487094	GPR155	3
chr2	173352775	173353195	-1834	CDCA7,ENSG00000144354.13,chr2:173354820-173368997	CDCA7	3
chr2	169357814	169358523	-4518	LRP2,ENSG00000081479.12,chr2:169127109-169362685	LRP2	3
chr2	169324602	169324961	-37905	LRP2,ENSG00000081479.12,chr2:169127109-169362685	LRP2	3
chr2	163849966	163850386	114163	FIGN,ENSG00000182263.13,chr2:163593396-163736012	FIGN	3
chr2	163780168	163780610	44376	FIGN,ENSG00000182263.13,chr2:163593396-163736012	FIGN	3
chr2	163748415	163749097	12743	FIGN,ENSG00000182263.13,chr2:163593396-163736012	FIGN	3
chr2	163666995	163667928	-68552	FIGN,ENSG00000182263.13,chr2:163593396-163736012	FIGN	3
chr2	163626556	163627102	-109184	FIGN,ENSG00000182263.13,chr2:163593396-163736012	FIGN	3
chr2	118078677	118079503	-9361	INSIG2,ENSG00000125629.14,chr2:118088452-118110997	INSIG2	3
chr2	102718518	102719243	-18009	MFSD9,ENSG00000135953.10,chr2:102715840-102736888	MFSD9	3
chr2	86331202	86331961	-6503	REEP1,ENSG00000068615.16,chr2:86213993-86338083	REEP1	3
chr2	47198820	47199691	22653	CALM2,ENSG00000143933.16,chr2:47160082-47176601	CALM2	3
chr2	40434852	40435466	-175895	SLC8A1,ENSG00000183023.18,chr2:40097270-40611053	SLC8A1	3
chr2	40401913	40402363	-208916	SLC8A1,ENSG00000183023.18,chr2:40097270-40611053	SLC8A1	3
chr2	40394883	40395703	-215761	SLC8A1,ENSG00000183023.18,chr2:40097270-40611053	SLC8A1	3
chr2	37738328	37739093	241	CDC42EP3,ENSG00000163171.7,chr2:37641882-37738468	CDC42EP3	3
chr2	37688915	37689587	-49218	CDC42EP3,ENSG00000163171.7,chr2:37641882-37738468	CDC42EP3	3
chr2	36371736	36372402	16144	CRIM1,ENSG00000150938.9,chr2:36355926-36551135	CRIM1	3
chr2	31251692	31252590	17805	EHD3,ENSG00000013016.14,chr2:31234337-31269447	EHD3	3
chr2	8806498	8806873	-30946	KIDINS220,ENSG00000134313.14,chr2:8725278-8837630	KIDINS220	3
chr19	51531398	51532289	-14	SIGLEC6,ENSG00000105492.15,chr19:51519525-51531856	SIGLEC6	3
chr19	46843976	46844548	-6731	AP2S1,ENSG00000042753.11,chr19:46838136-46850992	AP2S1	3
chr19	44776295	44777224	-1109	CBLC,ENSG00000142273.10,chr19:44777869-44800634	CBLC	3
chr19	17286777	17287191	4197	USHBP1,ENSG00000130307.11,chr19:17249176-17282786	USHBP1	3
chr19	17065195	17066091	-9983	HAUS8,ENSG00000131351.14,chr19:17049729-17075625	HAUS8	3
chr19	14037444	14037828	5889	IL27RA,ENSG00000104998.3,chr19:14031748-14053216	IL27RA	3
chr19	11138565	11139197	-16928	SPC24,ENSG00000161888.11,chr19:11131520-11155808	SPC24	3
chr19	7792028	7792959	4945	CLEC4GP1,ENSG00000268297.1,chr19:7787549-7790621	CLEC4GP1	3
chr19	3603113	3604002	-3284	TBXA2R,ENSG00000006638.11,chr19:3594506-3606840	TBXA2R	3
chr18	70280632	70280912	-8128	SOCS6,ENSG00000170677.5,chr18:70288901-70330200	SOCS6	3
chr18	70276447	70277281	-12036	SOCS6,ENSG00000170677.5,chr18:70288901-70330200	SOCS6	3
chr18	46192843	46193639	19689	C18orf25,ENSG00000152242.10,chr18:46173553-46266991	C18orf25	3
chr18	46155505	46155976	-17812	C18orf25,ENSG00000152242.10,chr18:46173553-46266991	C18orf25	3
chr18	46062294	46063210	-9521	PSTPIP2,ENSG00000152229.18,chr18:45983536-46072272	PSTPIP2	3
chr18	31225633	31226122	63020	DSC1,ENSG00000134765.9,chr18:31129236-31162856	DSC1	3
chr18	7532904	7533349	-33655	PTPRM,ENSG00000173482.16,chr18:7566782-8406861	PTPRM	3
chr18	7457266	7457659	-109319	PTPRM,ENSG00000173482.16,chr18:7566782-8406861	PTPRM	3
chr17	81049874	81050600	15116	BAIAP2,ENSG00000175866.15,chr17:81035122-81117432	BAIAP2	3
chr17	81043695	81044426	8939	BAIAP2,ENSG00000175866.15,chr17:81035122-81117432	BAIAP2	3
chr17	80984705	80985159	-6665	CHMP6,ENSG00000176108.9,chr17:80991598-81009517	CHMP6	3
chr17	75552811	75554044	28348	LLGL2,ENSG00000073350.13,chr17:75525080-75575208	LLGL2	3
chr17	73293064	73293917	-18686	CDC42EP4,ENSG00000179604.9,chr17:73283624-73312175	CDC42EP4	3
chr17	66951633	66952948	-12619	CACNG4,ENSG00000075461.5,chr17:66964910-67033398	CACNG4	3
chr17	57948273	57949167	-6604	CUEDC1,ENSG00000180891.12,chr17:57861243-57955323	CUEDC1	3
chr17	50523169	50523664	-9126	EPN3,ENSG00000049283.17,chr17:50532543-50543750	EPN3	3
chr17	50428797	50429655	3069	ACSF2,ENSG00000167107.12,chr17:50426158-50474845	ACSF2	3
chr17	50423859	50424216	-2120	ACSF2,ENSG00000167107.12,chr17:50426158-50474845	ACSF2	3
chr17	37493176	37493515	3515	DUSP14,ENSG00000276023.4,chr17:37489831-37513501	DUSP14	3
chr17	37476281	37477132	-13124	DUSP14,ENSG00000276023.4,chr17:37489831-37513501	DUSP14	3
chr17	5947396	5948252	175591	WSCD1,ENSG00000179314.13,chr17:5772234-6124427	WSCD1	3
chr16	84555553	84556202	1843	TLDC1,ENSG00000140950.15,chr16:84476421-84554033	TLDC1	3
chr16	69070907	69071385	-34417	HAS3,ENSG00000103044.10,chr16:69105564-69118719	HAS3	3
chr16	67404549	67405618	11547	TPPP3,ENSG00000159713.10,chr16:67389809-67393535	TPPP3	3
chr16	23254410	23254715	-23668	SCNN1B,ENSG00000168447.10,chr16:23278231-23381299	SCNN1B	3
chr16	1287916	1288479	-641	TPSP2,ENSG00000260284.1,chr16:1286351-1288837	TPSP2	3
chr15	100877353	100878241	84	ALDH1A3,ENSG00000184254.16,chr15:100877714-100916626	ALDH1A3	3
chr15	96325615	96326231	-14	NR2F2,ENSG00000185551.12,chr15:96325938-96340263	NR2F2	3
chr15	83496982	83497711	50119	SH3GL3,ENSG00000140600.16,chr15:83447228-83618743	SH3GL3	3
chr15	83372239	83372906	-74655	SH3GL3,ENSG00000140600.16,chr15:83447228-83618743	SH3GL3	3
chr15	83285758	83286545	1434	BNC1,ENSG00000169594.12,chr15:83255903-83284716	BNC1	3
chr15	65364866	65365877	-12670	IGDCC3,ENSG00000174498.13,chr15:65327127-65378040	IGDCC3	3
chr15	50162643	50163666	-19041	SLC27A2,ENSG00000140284.10,chr15:50182196-50236395	SLC27A2	3
chr15	50137108	50137834	-44724	SLC27A2,ENSG00000140284.10,chr15:50182196-50236395	SLC27A2	3
chr14	62017689	62018995	22520	SYT16,ENSG00000139973.15,chr14:61995823-62112550	SYT16	3
chr14	61973765	61974647	-21616	SYT16,ENSG00000139973.15,chr14:61995823-62112550	SYT16	3
chr14	61940654	61941780	-54605	SYT16,ENSG00000139973.15,chr14:61995823-62112550	SYT16	3
chr14	59215401	59216258	27184	DAAM1,ENSG00000100592.15,chr14:59188646-59371405	DAAM1	3
chr14	54576748	54577418	9987	SAMD4A,ENSG00000020577.13,chr14:54567097-54793315	SAMD4A	3
chr14	52447130	52447725	-105096	TXNDC16,ENSG00000087301.8,chr14:52430590-52552522	TXNDC16	3
chr14	23061804	23062388	4557	CDH24,ENSG00000139880.19,chr14:23047062-23057538	CDH24	3
chr13	113842922	113844319	-20448	GAS6,ENSG00000183087.14,chr13:113820549-113864067	GAS6	3
chr13	99072785	99073384	-13542	DOCK9,ENSG00000088387.17,chr13:98793487-99086625	DOCK9	3
chr13	95430305	95431152	-2875	CLDN10,ENSG00000134873.9,chr13:95433604-95579759	CLDN10	3
chr13	91193268	91193791	62121	LINC00379,ENSG00000229557.1,chr13:91127613-91131407	LINC00379	3
chr13	91154583	91155996	23881	LINC00379,ENSG00000229557.1,chr13:91127613-91131407	LINC00379	3
chr13	60166875	60167652	3275	DIAPH3,ENSG00000139734.17,chr13:59665583-60163987	DIAPH3	3
chr13	49373674	49374137	-70222	CAB39L,ENSG00000102547.18,chr13:49308650-49444126	CAB39L	3
chr12	130178932	130179890	16953	FZD10,ENSG00000111432.4,chr12:130162459-130165740	FZD10	3
chr12	113228662	113228983	7727	IQCD,ENSG00000166578.9,chr12:113195441-113221094	IQCD	3
chr12	72306860	72307635	32339	TRHDE-AS1,ENSG00000236333.3,chr12:72253508-72274907	TRHDE-AS1	3
chr12	55972081	55972449	-1053	PMEL,ENSG00000185664.14,chr12:55954105-55973317	PMEL	3
chr12	55955713	55956646	-10589	CDK2,ENSG00000123374.10,chr12:55966769-55972784	CDK2	3
chr12	55839411	55840131	-3196	MMP19,ENSG00000123342.15,chr12:55835433-55842966	MMP19	3
chr12	51264206	51264669	-6454	SMAGP,ENSG00000170545.16,chr12:51244558-51270890	SMAGP	3
chr12	46260115	46261413	-9254	SLC38A1,ENSG00000111371.15,chr12:46183063-46270017	SLC38A1	3
chr12	40386972	40388136	-5840	MUC19,ENSG00000205592.13,chr12:40393395-40570832	MUC19	3
chr12	16350677	16351054	3724	MGST1,ENSG00000008394.12,chr12:16347142-16609259	MGST1	3
chr12	14931858	14932516	-6896	ERP27,ENSG00000139055.6,chr12:14914035-14939082	ERP27	3
chr12	7928213	7928964	-7688	SLC2A3,ENSG00000059804.15,chr12:7919230-7936275	SLC2A3	3
chr11	130146053	130147755	-12657	ST14,ENSG00000149418.10,chr11:130159562-130210376	ST14	3
chr11	129849189	129850093	33823	TMEM45B,ENSG00000151715.7,chr11:129815819-129860003	TMEM45B	3
chr11	128908381	128909309	2809	C11orf45,ENSG00000174370.9,chr11:128899565-128906035	C11orf45	3
chr11	117089710	117090398	-8384	SIK3,ENSG00000160584.15,chr11:116843402-117098437	SIK3	3
chr11	107054232	107054766	35974	GUCY1A2,ENSG00000152402.10,chr11:106674012-107018524	GUCY1A2	3
chr11	102012798	102013383	-34352	C11orf70,ENSG00000137691.12,chr11:102047443-102084560	C11orf70	3
chr11	93887733	93888953	37811	VSTM5,ENSG00000214376.5,chr11:93818232-93850531	VSTM5	3
chr11	93841007	93841973	-9042	VSTM5,ENSG00000214376.5,chr11:93818232-93850531	VSTM5	3
chr11	77170067	77170666	42103	MYO7A,ENSG00000137474.19,chr11:77128264-77215239	MYO7A	3
chr11	76868454	76869223	7972	ACER3,ENSG00000078124.11,chr11:76860867-77026797	ACER3	3
chr11	75366633	75367485	15353	ARRB1,ENSG00000137486.16,chr11:75264182-75351705	ARRB1	3
chr11	73227695	73228491	9796	P2RY2,ENSG00000175591.11,chr11:73218298-73236352	P2RY2	3
chr11	73225067	73225364	6918	P2RY2,ENSG00000175591.11,chr11:73218298-73236352	P2RY2	3
chr11	69575481	69576330	-65181	CCND1,ENSG00000110092.3,chr11:69641087-69654474	CCND1	3
chr11	69496967	69497741	17413	AP000439.3,ENSG00000255774.1,chr11:69477133-69479940	AP000439.3	3
chr11	69283426	69284448	-10200	MYEOV,ENSG00000172927.7,chr11:69294138-69367726	MYEOV	3
chr11	63934545	63934919	-4226	NAA40,ENSG00000110583.12,chr11:63938959-63957328	NAA40	3
chr11	57292755	57293572	-31790	TNKS1BP1,ENSG00000149115.13,chr11:57299638-57324952	TNKS1BP1	3
chr11	45807742	45808044	3822	SLC35C1,ENSG00000181830.8,chr11:45804072-45813015	SLC35C1	3
chr11	13258922	13259269	-17556	ARNTL,ENSG00000133794.17,chr11:13276652-13387266	ARNTL	3
chr11	13224212	13224663	-52214	ARNTL,ENSG00000133794.17,chr11:13276652-13387266	ARNTL	3
chr11	11813277	11813639	-27964	USP47,ENSG00000170242.17,chr11:11841423-11959323	USP47	3
chr11	10842557	10843845	-15057	ZBED5-AS1,ENSG00000247271.6,chr11:10858259-10906802	ZBED5-AS1	3
chr11	7484649	7485399	-363	OLFML1,ENSG00000183801.7,chr11:7485388-7511377	OLFML1	3
chr11	7469217	7469995	-15781	OLFML1,ENSG00000183801.7,chr11:7485388-7511377	OLFML1	3
chr11	6249677	6250282	-9756	CCKBR,ENSG00000110148.9,chr11:6259736-6272127	CCKBR	3
chr10	132574738	132575510	37305	INPP5A,ENSG00000068383.18,chr10:132537820-132783480	INPP5A	3
chr10	121999581	122000034	10634	TACC2,ENSG00000138162.17,chr10:121989174-122254545	TACC2	3
chr10	121988339	121989548	-230	TACC2,ENSG00000138162.17,chr10:121989174-122254545	TACC2	3
chr10	114412848	114413566	8450	AFAP1L2,ENSG00000169129.14,chr10:114294824-114404756	AFAP1L2	3
chr10	114349502	114350333	-54840	AFAP1L2,ENSG00000169129.14,chr10:114294824-114404756	AFAP1L2	3
chr10	103272939	103273363	-4011	INA,ENSG00000148798.9,chr10:103277163-103290351	INA	3
chr10	100350403	100350969	3563	SCD,ENSG00000099194.5,chr10:100347124-100364834	SCD	3
chr10	97571495	97572581	-460	ANKRD2,ENSG00000165887.11,chr10:97572499-97583884	ANKRD2	3
chr10	77936720	77937355	9666	DLG5-AS1,ENSG00000233871.2,chr10:77927372-77929824	DLG5-AS1	3
chr10	74179270	74179617	28259	ADK,ENSG00000156110.13,chr10:74151185-74709303	ADK	3
chr10	62224619	62225153	-43822	RTKN2,ENSG00000182010.10,chr10:62183035-62268707	RTKN2	3
chr10	47481316	47482104	-2449	ANXA8,ENSG00000265190.6,chr10:47460162-47484158	ANXA8	3
chr10	47462624	47463280	-21207	ANXA8,ENSG00000265190.6,chr10:47460162-47484158	ANXA8	3
chr10	47442080	47442869	-41685	ANXA8,ENSG00000265190.6,chr10:47460162-47484158	ANXA8	3
chr10	46377697	46378515	2480	ANXA8L1,ENSG00000264230.7,chr10:46375627-46537864	ANXA8L1	3
chr10	22897129	22897772	-30573	ARMC3,ENSG00000165309.13,chr10:22928024-23038523	ARMC3	3
chr10	3091473	3091839	25324	PFKP,ENSG00000067057.16,chr10:3066333-3137712	PFKP	3
chr1	236502586	236503622	-14895	LGALS8,ENSG00000116977.18,chr1:236518000-236552981	LGALS8	3
chr1	209815807	209816771	10113	IRF6,ENSG00000117595.10,chr1:209785623-209806175	IRF6	3
chr1	209808080	209808454	2091	IRF6,ENSG00000117595.10,chr1:209785623-209806175	IRF6	3
chr1	209409796	209410376	-18733	MIR205HG,ENSG00000230937.9,chr1:209428820-209432838	MIR205HG	3
chr1	208154554	208155310	-89389	PLXNA2,ENSG00000076356.6,chr1:208022242-208244320	PLXNA2	3
chr1	208107578	208108748	-136158	PLXNA2,ENSG00000076356.6,chr1:208022242-208244320	PLXNA2	3
chr1	205515713	205516399	11462	CDK18,ENSG00000117266.15,chr1:205504595-205532793	CDK18	3
chr1	204085773	204086406	12975	SOX13,ENSG00000143842.14,chr1:204073115-204127743	SOX13	3
chr1	203536669	203537387	42886	OPTC,ENSG00000188770.9,chr1:203494143-203508864	OPTC	3
chr1	200629666	200630439	9317	KIF14,ENSG00000118193.11,chr1:200551497-200620734	KIF14	3
chr1	183374728	183375233	-43623	NMNAT2,ENSG00000157064.10,chr1:183248237-183418602	NMNAT2	3
chr1	156896443	156897311	3180	PEAR1,ENSG00000187800.13,chr1:156893698-156916434	PEAR1	3
chr1	151990123	151990555	-4052	S100A10,ENSG00000197747.8,chr1:151982915-151994390	S100A10	3
chr1	151606383	151607014	-5366	SNX27,ENSG00000143376.12,chr1:151612065-151699091	SNX27	3
chr1	151515786	151516586	5677	CGN,ENSG00000143375.14,chr1:151510510-151538692	CGN	3
chr1	119688809	119689247	29231	PHGDH,ENSG00000092621.11,chr1:119659798-119744215	PHGDH	3
chr1	94100591	94102137	-19769	ABCA4,ENSG00000198691.11,chr1:93992835-94121132	ABCA4	3
chr1	85224796	85226250	24476	SYDE2,ENSG00000097096.8,chr1:85156873-85201046	SYDE2	3
chr1	85212421	85212944	11635	SYDE2,ENSG00000097096.8,chr1:85156873-85201046	SYDE2	3
chr1	84851659	84852693	-41038	LPAR3,ENSG00000171517.5,chr1:84811602-84893213	LPAR3	3
chr1	66993060	66993459	-60841	SLC35D1,ENSG00000116704.7,chr1:66999332-67054099	SLC35D1	3
chr1	54579060	54579615	37081	ACOT11,ENSG00000162390.17,chr1:54542257-54639192	ACOT11	3
chr1	46155120	46155628	-19698	TSPAN1,ENSG00000117472.9,chr1:46175073-46185958	TSPAN1	3
chr1	33248256	33248674	-8079	ZNF362,ENSG00000160094.14,chr1:33256545-33300719	ZNF362	3
chr1	32494153	32494611	29314	ZBTB8B,ENSG00000273274.1,chr1:32465069-32496686	ZBTB8B	3
chr1	27933444	27934149	-1196	SMPDL3B,ENSG00000130768.14,chr1:27934993-27959157	SMPDL3B	3
chr1	27712198	27712882	-13438	FAM76A,ENSG00000009780.15,chr1:27725979-27763122	FAM76A	3
chr1	23196596	23197456	2296	HTR1D,ENSG00000179546.4,chr1:23191895-23194729	HTR1D	3
chr1	19009753	19011481	53930	IFFO2,ENSG00000169991.10,chr1:18904281-18956686	IFFO2	3
chr1	18965427	18966268	9160	IFFO2,ENSG00000169991.10,chr1:18904281-18956686	IFFO2	3
chr1	18939853	18940192	-16665	IFFO2,ENSG00000169991.10,chr1:18904281-18956686	IFFO2	3
chr1	11858665	11859966	383	NPPB,ENSG00000120937.8,chr1:11857464-11858931	NPPB	3
chr9	131745745	131745961	5778	RAPGEF1,ENSG00000107263.18,chr9:131576770-131740074	RAPGEF1	4
chr9	131744382	131745525	4878	RAPGEF1,ENSG00000107263.18,chr9:131576770-131740074	RAPGEF1	4
chr9	130331590	130332201	66014	HMCN2,ENSG00000148357.16,chr9:130265882-130434123	HMCN2	4
chr9	130325922	130326405	60282	HMCN2,ENSG00000148357.16,chr9:130265882-130434123	HMCN2	4
chr9	98176849	98177360	-15537	CORO2A,ENSG00000106789.12,chr9:98120975-98192640	CORO2A	4
chr9	96420463	96421162	2482	ZNF367,ENSG00000165244.6,chr9:96385941-96418329	ZNF367	4
chr9	81626321	81627251	-62520	TLE1,ENSG00000196781.13,chr9:81583683-81689305	TLE1	4
chr9	78072542	78073205	41414	GNAQ,ENSG00000156052.10,chr9:77716087-78031458	GNAQ	4
chr8	141028336	141028800	26351	PTK2,ENSG00000169398.19,chr8:140657900-141002216	PTK2	4
chr8	141017671	141017977	15607	PTK2,ENSG00000169398.19,chr8:140657900-141002216	PTK2	4
chr8	140987585	140988179	-14335	PTK2,ENSG00000169398.19,chr8:140657900-141002216	PTK2	4
chr8	130029266	130029703	12354	FAM49B,ENSG00000153310.18,chr8:129839593-130017129	FAM49B	4
chr8	55830069	55830824	-49366	LYN,ENSG00000254087.7,chr8:55879813-56014168	LYN	4
chr8	41323136	41324024	14082	SFRP1,ENSG00000104332.11,chr8:41261958-41309497	SFRP1	4
chr7	152664529	152665082	-11361	XRCC2,ENSG00000196584.2,chr7:152644779-152676165	XRCC2	4
chr7	100718211	100719096	-2146	EPO,ENSG00000130427.2,chr7:100720800-100723700	EPO	4
chr7	88226999	88227656	333	SRI,ENSG00000075142.13,chr7:88205118-88226993	SRI	4
chr7	75729117	75729625	-9592	HIP1,ENSG00000127946.16,chr7:75533300-75738962	HIP1	4
chr7	55563683	55564262	-9017	VOPP1,ENSG00000154978.12,chr7:55436056-55572988	VOPP1	4
chr7	2730900	2731401	51629	AMZ1,ENSG00000174945.13,chr7:2679522-2775500	AMZ1	4
chr6	150881878	150882574	16678	MTHFD1L,ENSG00000120254.15,chr6:150865549-151101887	MTHFD1L	4
chr6	150854863	150855650	-10292	MTHFD1L,ENSG00000120254.15,chr6:150865549-151101887	MTHFD1L	4
chr6	124882019	124882677	-80196	RNF217,ENSG00000146373.16,chr6:124962545-125092633	RNF217	4
chr6	105374009	105374444	-28859	PREP,ENSG00000085377.13,chr6:105277565-105403084	PREP	4
chr6	52566680	52567387	-9883	TRAM2,ENSG00000065308.4,chr6:52497402-52576915	TRAM2	4
chr6	52511573	52512581	-64839	TRAM2,ENSG00000065308.4,chr6:52497402-52576915	TRAM2	4
chr6	43579121	43579531	3177	POLH,ENSG00000170734.11,chr6:43576150-43615660	POLH	4
chr6	18434309	18434906	47258	RNF144B,ENSG00000137393.9,chr6:18387350-18468874	RNF144B	4
chr6	7561118	7561970	19970	DSP,ENSG00000096696.13,chr6:7541575-7586717	DSP	4
chr5	14216514	14217425	73268	TRIO,ENSG00000038382.17,chr5:14143702-14532128	TRIO	4
chr5	14118421	14119249	-24866	TRIO,ENSG00000038382.17,chr5:14143702-14532128	TRIO	4
chr4	168486898	168488054	-9589	PALLD,ENSG00000129116.17,chr4:168497066-168928457	PALLD	4
chr4	152943501	152944199	7499	FHDC1,ENSG00000137460.8,chr4:152936352-152979696	FHDC1	4
chr4	142886471	142887105	39355	INPP4B,ENSG00000109452.12,chr4:142023160-142847432	INPP4B	4
chr4	107689978	107690569	-30180	PAPSS1,ENSG00000138801.8,chr4:107590276-107720452	PAPSS1	4
chr3	172126889	172127433	87534	FNDC3B,ENSG00000075420.12,chr3:172039628-172401665	FNDC3B	4
chr3	172082253	172082702	42850	FNDC3B,ENSG00000075420.12,chr3:172039628-172401665	FNDC3B	4
chr3	135994459	135995275	29195	PPP2R3A,ENSG00000073711.10,chr3:135965673-136147891	PPP2R3A	4
chr3	127809286	127810102	-13557	MGLL,ENSG00000074416.13,chr3:127689062-127823250	MGLL	4
chr3	58093683	58094237	-76677	FLNB-AS1,ENSG00000244161.1,chr3:58162547-58170636	FLNB-AS1	4
chr3	58047815	58048130	39573	FLNB,ENSG00000136068.14,chr3:58008400-58172251	FLNB	4
chr3	58005642	58006046	-2555	FLNB,ENSG00000136068.14,chr3:58008400-58172251	FLNB	4
chr3	56633175	56633916	-49693	FAM208A,ENSG00000163946.13,chr3:56620133-56683237	FAM208A	4
chr3	32856368	32856849	38591	TRIM71,ENSG00000206557.5,chr3:32818018-32897826	TRIM71	4
chr22	39474405	39475032	-2105	MGAT3-AS1,ENSG00000227188.1,chr22:39475807-39476822	MGAT3-AS1	4
chr22	36360823	36361388	-26914	MYH9,ENSG00000100345.20,chr22:36281281-36388018	MYH9	4
chr22	23401091	23401706	-1329	ZDHHC8P1,ENSG00000133519.12,chr22:23390606-23402726	ZDHHC8P1	4
chr21	33739270	33740400	95908	CRYZL1,ENSG00000205758.11,chr21:33589341-33643926	CRYZL1	4
chr20	25384544	25385098	-6163	ABHD12,ENSG00000100997.18,chr20:25294743-25390983	ABHD12	4
chr20	25381867	25382401	-8850	ABHD12,ENSG00000100997.18,chr20:25294743-25390983	ABHD12	4
chr2	234998612	234999230	46949	SH3BP4,ENSG00000130147.15,chr2:234951973-235055714	SH3BP4	4
chr2	234981143	234981821	29510	SH3BP4,ENSG00000130147.15,chr2:234951973-235055714	SH3BP4	4
chr2	196208695	196209336	32511	STK17B,ENSG00000081320.10,chr2:196133566-196176503	STK17B	4
chr2	120237353	120239026	-1874	RALB,ENSG00000144118.13,chr2:120240064-120294713	RALB	4
chr2	105541607	105542102	103340	FHL2,ENSG00000115641.18,chr2:105357712-105438513	FHL2	4
chr2	105467766	105468271	29504	FHL2,ENSG00000115641.18,chr2:105357712-105438513	FHL2	4
chr2	105443765	105444517	5627	FHL2,ENSG00000115641.18,chr2:105357712-105438513	FHL2	4
chr2	101762655	101763365	66161	MAP4K4,ENSG00000071054.15,chr2:101696850-101894689	MAP4K4	4
chr2	85145159	85145845	12093	TCF7L1,ENSG00000152284.4,chr2:85133410-85310388	TCF7L1	4
chr19	46720898	46722433	4537	PRKD2,ENSG00000105287.12,chr19:46674275-46717127	PRKD2	4
chr19	10620837	10621158	18541	SLC44A2,ENSG00000129353.14,chr19:10602457-10644559	SLC44A2	4
chr18	11955487	11956024	-25269	IMPA2,ENSG00000141401.11,chr18:11981025-12030883	IMPA2	4
chr17	82106284	82106803	8210	FASN,ENSG00000169710.6,chr17:82078338-82098332	FASN	4
chr16	88772908	88773780	-11868	PIEZO1,ENSG00000103335.19,chr16:88715343-88785211	PIEZO1	4
chr16	88764957	88765431	-20018	PIEZO1,ENSG00000103335.19,chr16:88715343-88785211	PIEZO1	4
chr16	67186741	67187043	2851	KIAA0895L,ENSG00000196123.12,chr16:67175602-67184040	KIAA0895L	4
chr16	24988675	24989559	-26550	ARHGAP17,ENSG00000140750.16,chr16:24919385-25015666	ARHGAP17	4
chr16	17482968	17484016	12610	XYLT1,ENSG00000103489.11,chr16:17101769-17470881	XYLT1	4
chr16	10328234	10329041	2204	ATF7IP2,ENSG00000166669.13,chr16:10326434-10483638	ATF7IP2	4
chr15	64886195	64886880	-25364	ANKDD1A,ENSG00000166839.16,chr15:64911902-64958700	ANKDD1A	4
chr14	93104533	93105704	-11203	ITPK1,ENSG00000100605.16,chr14:92936914-93116320	ITPK1	4
chr14	61670403	61670957	-24832	HIF1A,ENSG00000100644.16,chr14:61695513-61748259	HIF1A	4
chr13	110556238	110556734	-5248	RAB20,ENSG00000139832.4,chr13:110523066-110561733	RAB20	4
chr13	110549014	110549766	-12344	RAB20,ENSG00000139832.4,chr13:110523066-110561733	RAB20	4
chr13	100660693	100661379	-14058	TMTC4,ENSG00000125247.15,chr13:100603927-100675093	TMTC4	4
chr13	98582750	98583368	5118	STK24,ENSG00000102572.14,chr13:98445185-98577940	STK24	4
chr13	77422531	77423240	95834	MYCBP2,ENSG00000005810.17,chr13:77044655-77327050	MYCBP2	4
chr13	51998691	51999461	-12419	ATP7B,ENSG00000123191.13,chr13:51932673-52011494	ATP7B	4
chr13	51997908	51998385	-13349	ATP7B,ENSG00000123191.13,chr13:51932673-52011494	ATP7B	4
chr12	122808739	122809522	-25322	HIP1R,ENSG00000130787.13,chr12:122834453-122862960	HIP1R	4
chr12	52230940	52232142	-978	KRT7,ENSG00000135480.14,chr12:52232520-52252186	KRT7	4
chr12	32892005	32892666	-4506	PKP2,ENSG00000057294.13,chr12:32790745-32896840	PKP2	4
chr12	6312459	6313465	2527	PLEKHG6,ENSG00000008323.15,chr12:6310436-6328506	PLEKHG6	4
chr11	95112018	95112716	22558	ENDOD1,ENSG00000149218.4,chr11:95089810-95132645	ENDOD1	4
chr11	62552988	62553879	-2803	AHNAK,ENSG00000124942.13,chr11:62433542-62556235	AHNAK	4
chr10	128049227	128049781	-76882	MKI67,ENSG00000148773.12,chr10:128096659-128126385	MKI67	4
chr10	125125968	125126639	-34868	CTBP2,ENSG00000175029.16,chr10:124984317-125161170	CTBP2	4
chr10	26445389	26446039	7512	APBB1IP,ENSG00000077420.15,chr10:26438203-26567803	APBB1IP	4
chr10	26361273	26361917	-76607	APBB1IP,ENSG00000077420.15,chr10:26438203-26567803	APBB1IP	4
chr10	3805885	3806381	20851	KLF6,ENSG00000067082.14,chr10:3775996-3785281	KLF6	4
chr1	229643973	229644576	18041	URB2,ENSG00000135763.9,chr1:229626234-229660199	URB2	4
chr1	214312464	214312958	31610	SMYD2,ENSG00000143499.13,chr1:214281102-214337131	SMYD2	4
chr1	186348088	186348805	-27248	TPR,ENSG00000047410.13,chr1:186311652-186375693	TPR	4
chr1	183060364	183061055	37250	LAMC1,ENSG00000135862.5,chr1:183023460-183145592	LAMC1	4
chr1	165637388	165637912	6790	MGST3,ENSG00000143198.12,chr1:165630861-165661796	MGST3	4
chr1	120460023	120460599	23959	NBPF8,ENSG00000270231.3,chr1:120436353-120467739	NBPF8	4
chr1	92804675	92805174	12519	EVI5,ENSG00000067208.14,chr1:92508696-92792404	EVI5	4
chr1	54402903	54403382	-10338	SSBP3,ENSG00000157216.15,chr1:54225432-54413479	SSBP3	4
chr1	23448858	23449775	24575	TCEA3,ENSG00000204219.9,chr1:23381061-23424740	TCEA3	4
chr1	13800962	13801605	101086	PRDM2,ENSG00000116731.22,chr1:13700198-13825079	PRDM2	4
chr1	4755343	4756115	100998	AJAP1,ENSG00000196581.10,chr1:4654732-4792534	AJAP1	4
chr1	4681193	4681774	26752	AJAP1,ENSG00000196581.10,chr1:4654732-4792534	AJAP1	4
chr1	3871327	3871792	14293	DFFB,ENSG00000169598.15,chr1:3857267-3885429	DFFB	4
chr9	133855714	133856337	116069	SARDH,ENSG00000123453.16,chr9:133663560-133739955	SARDH	5
chr9	133690018	133690568	32979	DBH-AS1,ENSG00000225756.1,chr9:133654586-133657313	DBH-AS1	5
chr9	133142719	133142989	-6481	RALGDS,ENSG00000160271.14,chr9:133097720-133149334	RALGDS	5
chr9	131094666	131095089	-1598	AIF1L,ENSG00000126878.12,chr9:131096476-131123152	AIF1L	5
chr9	124659082	124659706	928	MIR181A2HG,ENSG00000224020.1,chr9:124658467-124698631	MIR181A2HG	5
chr9	124652555	124653195	-5591	MIR181A2HG,ENSG00000224020.1,chr9:124658467-124698631	MIR181A2HG	5
chr9	123945359	123946197	15625	DENND1A,ENSG00000119522.15,chr9:123379654-123930152	DENND1A	5
chr9	121286774	121287723	1717	GSN-AS1,ENSG00000235865.2,chr9:121280768-121285530	GSN-AS1	5
chr9	98148544	98148796	29457	TRIM14,ENSG00000106785.14,chr9:98069275-98119212	TRIM14	5
chr9	87711756	87712517	-13382	CTSL,ENSG00000135047.14,chr9:87725519-87731393	CTSL	5
chr9	5517026	5517514	6701	PDCD1LG2,ENSG00000197646.7,chr9:5510570-5571254	PDCD1LG2	5
chr9	5509624	5510000	-757	PDCD1LG2,ENSG00000197646.7,chr9:5510570-5571254	PDCD1LG2	5
chr8	39004675	39005310	8124	ADAM9,ENSG00000168615.11,chr8:38996869-39105144	ADAM9	5
chr8	27361751	27362465	50627	PTK2B,ENSG00000120899.17,chr8:27311482-27459391	PTK2B	5
chr8	27355999	27356728	44882	PTK2B,ENSG00000120899.17,chr8:27311482-27459391	PTK2B	5
chr8	27334529	27335042	23304	PTK2B,ENSG00000120899.17,chr8:27311482-27459391	PTK2B	5
chr8	27333046	27333759	21921	PTK2B,ENSG00000120899.17,chr8:27311482-27459391	PTK2B	5
chr8	25195365	25195853	10887	DOCK5,ENSG00000147459.17,chr8:25184723-25418082	DOCK5	5
chr8	22985224	22985893	-1858	RHOBTB2,ENSG00000008853.16,chr8:22987417-23020199	RHOBTB2	5
chr8	20306494	20307198	2882	LZTS1,ENSG00000061337.15,chr8:20246165-20303963	LZTS1	5
chr7	142956896	142958112	-5178	KEL,ENSG00000197993.7,chr7:142941114-142962681	KEL	5
chr7	137985248	137985583	-16653	CREB3L2,ENSG00000182158.14,chr7:137874979-138002067	CREB3L2	5
chr7	137978358	137979544	-23117	CREB3L2,ENSG00000182158.14,chr7:137874979-138002067	CREB3L2	5
chr7	134834594	134835358	90725	CALD1,ENSG00000122786.19,chr7:134744252-134970728	CALD1	5
chr7	134742173	134742981	-1674	CALD1,ENSG00000122786.19,chr7:134744252-134970728	CALD1	5
chr7	80183932	80185130	50577	GNAI1,ENSG00000127955.15,chr7:80133955-80219402	GNAI1	5
chr7	80150856	80151289	17118	GNAI1,ENSG00000127955.15,chr7:80133955-80219402	GNAI1	5
chr7	80145744	80146347	12091	GNAI1,ENSG00000127955.15,chr7:80133955-80219402	GNAI1	5
chr7	73585145	73585577	6569	TBL2,ENSG00000106638.15,chr7:73568932-73578791	TBL2	5
chr7	55185938	55186585	-2674	EGFR-AS1,ENSG00000224057.1,chr7:55179750-55188934	EGFR-AS1	5
chr7	55133670	55134114	-55043	EGFR-AS1,ENSG00000224057.1,chr7:55179750-55188934	EGFR-AS1	5
chr7	55120522	55121632	-67858	EGFR-AS1,ENSG00000224057.1,chr7:55179750-55188934	EGFR-AS1	5
chr7	47575697	47576940	-6241	TNS3,ENSG00000136205.16,chr7:47275154-47582558	TNS3	5
chr7	47557686	47558527	-24453	TNS3,ENSG00000136205.16,chr7:47275154-47582558	TNS3	5
chr7	47508400	47509211	-73754	TNS3,ENSG00000136205.16,chr7:47275154-47582558	TNS3	5
chr7	23464998	23465968	-4985	IGF2BP3,ENSG00000136231.13,chr7:23310209-23470467	IGF2BP3	5
chr6	157764476	157765237	64470	SNX9,ENSG00000130340.14,chr6:157700387-157945077	SNX9	5
chr6	157763182	157763921	63165	SNX9,ENSG00000130340.14,chr6:157700387-157945077	SNX9	5
chr6	157754999	157755484	54855	SNX9,ENSG00000130340.14,chr6:157700387-157945077	SNX9	5
chr6	157723759	157724753	23870	SNX9,ENSG00000130340.14,chr6:157700387-157945077	SNX9	5
chr6	157699849	157700609	-157	SNX9,ENSG00000130340.14,chr6:157700387-157945077	SNX9	5
chr6	139408964	139409539	34630	CITED2,ENSG00000164442.9,chr6:139371807-139374620	CITED2	5
chr6	110819586	110819947	3807	CDK19,ENSG00000155111.14,chr6:110609978-110815958	CDK19	5
chr6	56378396	56379560	-15117	COL21A1,ENSG00000124749.16,chr6:56056590-56394094	COL21A1	5
chr6	44177684	44178697	19380	CAPN11,ENSG00000137225.12,chr6:44158811-44184402	CAPN11	5
chr6	44156290	44156906	-2212	CAPN11,ENSG00000137225.12,chr6:44158811-44184402	CAPN11	5
chr6	42923775	42924326	-5141	CNPY3,ENSG00000137161.16,chr6:42929192-42939287	CNPY3	5
chr6	32861135	32861737	7457	TAP1,ENSG00000168394.10,chr6:32845209-32853978	TAP1	5
chr6	29790663	29791056	-94	HLA-V,ENSG00000181126.13,chr6:29790954-29797811	HLA-V	5
chr6	2960029	2960750	-11777	SERPINB6,ENSG00000124570.17,chr6:2948159-2972165	SERPINB6	5
chr5	178273836	178274608	41430	PHYKPL,ENSG00000175309.14,chr5:178208497-178232791	PHYKPL	5
chr5	178261745	178262547	29354	PHYKPL,ENSG00000175309.14,chr5:178208497-178232791	PHYKPL	5
chr5	172858528	172859631	24805	ERGIC1,ENSG00000113719.15,chr5:172834275-172952685	ERGIC1	5
chr5	172451638	172452250	-2580	SH3PXD2B,ENSG00000174705.11,chr5:172325181-172454523	SH3PXD2B	5
chr5	157571582	157572285	-3843	ADAM19,ENSG00000135074.15,chr5:157395534-157575775	ADAM19	5
chr5	151597210	151597642	28481	FAT2,ENSG00000086570.12,chr5:151504093-151568944	FAT2	5
chr5	96823806	96824415	16009	ERAP1,ENSG00000164307.12,chr5:96760810-96808100	ERAP1	5
chr5	80941476	80942342	-18762	RASGRF2,ENSG00000113319.11,chr5:80960672-81230156	RASGRF2	5
chr5	80470911	80471674	-16676	FAM151B,ENSG00000152380.9,chr5:80487969-80542563	FAM151B	5
chr5	79705719	79706776	16371	CMYA5,ENSG00000164309.14,chr5:79689877-79800240	CMYA5	5
chr5	69242269	69243035	7858	CDK7,ENSG00000134058.10,chr5:69234795-69277430	CDK7	5
chr5	38638575	38639076	30470	LIFR,ENSG00000113594.9,chr5:38474963-38608354	LIFR	5
chr5	38599772	38600301	-8319	LIFR,ENSG00000113594.9,chr5:38474963-38608354	LIFR	5
chr5	38598241	38599564	-9453	LIFR,ENSG00000113594.9,chr5:38474963-38608354	LIFR	5
chr5	38595235	38595913	-12781	LIFR,ENSG00000113594.9,chr5:38474963-38608354	LIFR	5
chr5	315999	316774	12211	AHRR,ENSG00000063438.16,chr5:304176-438291	AHRR	5
chr4	124846216	124847139	133944	ANKRD50,ENSG00000151458.11,chr4:124664052-124712732	ANKRD50	5
chr4	102429502	102429991	-1513	SLC39A8,ENSG00000138821.12,chr4:102251041-102431258	SLC39A8	5
chr4	94419753	94420324	-31818	PDLIM5,ENSG00000163110.14,chr4:94451857-94668227	PDLIM5	5
chr4	89112083	89112800	942	TIGD2,ENSG00000180346.3,chr4:89111500-89114899	TIGD2	5
chr4	85508419	85509267	33730	ARHGAP24,ENSG00000138639.17,chr4:85475114-86002670	ARHGAP24	5
chr4	83112884	83113415	-23927	PLAC8,ENSG00000145287.10,chr4:83090048-83137075	PLAC8	5
chr4	52852423	52853101	-9527	RASL11B,ENSG00000128045.6,chr4:52862290-52866835	RASL11B	5
chr4	6312860	6313732	43448	WFS1,ENSG00000109501.13,chr4:6269849-6303265	WFS1	5
chr3	178794836	178795683	-65147	KCNMB2-AS1,ENSG00000237978.5,chr3:178526505-178860405	KCNMB2-AS1	5
chr3	160869685	160870300	114391	PPM1L,ENSG00000163590.13,chr3:160755602-161078907	PPM1L	5
chr3	160784677	160785194	29334	PPM1L,ENSG00000163590.13,chr3:160755602-161078907	PPM1L	5
chr3	141202664	141203151	-25818	PXYLP1,ENSG00000155893.11,chr3:141228726-141294906	PXYLP1	5
chr3	123099030	123099620	32264	PDIA5,ENSG00000065485.17,chr3:123067062-123225227	PDIA5	5
chr3	123080820	123081267	13982	PDIA5,ENSG00000065485.17,chr3:123067062-123225227	PDIA5	5
chr3	87002087	87002900	11373	VGLL3,ENSG00000206538.7,chr3:86937969-86991119	VGLL3	5
chr3	86922876	86923496	-67934	VGLL3,ENSG00000206538.7,chr3:86937969-86991119	VGLL3	5
chr3	69091774	69092579	7233	ARL6IP5,ENSG00000144746.6,chr3:69084944-69106066	ARL6IP5	5
chr3	49957808	49958890	18343	RBM6,ENSG00000004534.14,chr3:49940007-50100045	RBM6	5
chr3	16800375	16800722	-2102	PLCL2,ENSG00000154822.15,chr3:16802651-17090594	PLCL2	5
chr3	16796760	16797174	-5683	PLCL2,ENSG00000154822.15,chr3:16802651-17090594	PLCL2	5
chr3	16784795	16785586	-17460	PLCL2,ENSG00000154822.15,chr3:16802651-17090594	PLCL2	5
chr3	16659001	16659812	-10901	DAZL,ENSG00000092345.13,chr3:16586792-16670306	DAZL	5
chr3	13218080	13218611	145227	IQSEC1,ENSG00000144711.13,chr3:12897220-13073117	IQSEC1	5
chr3	13124979	13125567	52155	IQSEC1,ENSG00000144711.13,chr3:12897220-13073117	IQSEC1	5
chr22	41333660	41334316	32467	ZC3H7B,ENSG00000100403.11,chr22:41301522-41360147	ZC3H7B	5
chr22	39466232	39466841	9193	MGAT3,ENSG00000128268.11,chr22:39457344-39492194	MGAT3	5
chr22	39453696	39454254	-3368	MGAT3,ENSG00000128268.11,chr22:39457344-39492194	MGAT3	5
chr22	39448312	39448820	-8777	MGAT3,ENSG00000128268.11,chr22:39457344-39492194	MGAT3	5
chr22	39428225	39429227	-28617	MGAT3,ENSG00000128268.11,chr22:39457344-39492194	MGAT3	5
chr22	37189275	37190113	-9692	C1QTNF6,ENSG00000133466.13,chr22:37180167-37199385	C1QTNF6	5
chr22	30328449	30329000	1677	TBC1D10A,ENSG00000099992.15,chr22:30291990-30327046	TBC1D10A	5
chr22	20853214	20853570	-5590	SNAP29,ENSG00000099940.11,chr22:20858983-20891218	SNAP29	5
chr21	32705006	32705482	-22805	SYNJ1,ENSG00000159082.17,chr21:32628759-32728048	SYNJ1	5
chr21	26819825	26820874	-25061	ADAMTS1,ENSG00000154734.14,chr21:26835747-26845409	ADAMTS1	5
chr21	26776426	26777475	-68460	ADAMTS1,ENSG00000154734.14,chr21:26835747-26845409	ADAMTS1	5
chr21	26714988	26715753	-130040	ADAMTS1,ENSG00000154734.14,chr21:26835747-26845409	ADAMTS1	5
chr20	46700326	46700823	-8912	SLC2A10,ENSG00000197496.5,chr20:46709487-46736347	SLC2A10	5
chr20	43491378	43492481	-15750	L3MBTL1,ENSG00000185513.14,chr20:43507680-43550950	L3MBTL1	5
chr20	37279185	37279937	-10076	MANBAL,ENSG00000101363.12,chr20:37289638-37317260	MANBAL	5
chr20	36827550	36828399	-35713	SOGA1,ENSG00000149639.14,chr20:36777442-36863686	SOGA1	5
chr2	237964950	237965464	-1619	UBE2F,ENSG00000184182.18,chr2:237966827-238042782	UBE2F	5
chr2	236499432	236500045	-7805	IQCA1,ENSG00000132321.16,chr2:236324147-236507542	IQCA1	5
chr2	215433660	215434228	-2229	FN1,ENSG00000115414.18,chr2:215360440-215436172	FN1	5
chr2	187509801	187511201	-55260	TFPI,ENSG00000003436.14,chr2:187464230-187565760	TFPI	5
chr2	151928378	151929170	100281	ARL5A,ENSG00000162980.16,chr2:151788984-151828492	ARL5A	5
chr2	128306197	128306640	-12160	HS6ST1,ENSG00000136720.6,chr2:128236716-128318577	HS6ST1	5
chr2	128304798	128305524	-13417	HS6ST1,ENSG00000136720.6,chr2:128236716-128318577	HS6ST1	5
chr2	98501814	98502344	57226	INPP4A,ENSG00000040933.15,chr2:98444854-98594390	INPP4A	5
chr2	98465855	98466749	21449	INPP4A,ENSG00000040933.15,chr2:98444854-98594390	INPP4A	5
chr2	98404586	98405524	-39798	INPP4A,ENSG00000040933.15,chr2:98444854-98594390	INPP4A	5
chr2	96872701	96873515	2350	SEMA4C,ENSG00000168758.10,chr2:96859716-96870757	SEMA4C	5
chr2	62672521	62673204	-988	EHBP1,ENSG00000115504.14,chr2:62673851-63046487	EHBP1	5
chr2	46310522	46310847	17018	EPAS1,ENSG00000116016.13,chr2:46293667-46386703	EPAS1	5
chr2	46309547	46309992	16103	EPAS1,ENSG00000116016.13,chr2:46293667-46386703	EPAS1	5
chr2	27198319	27199229	-13252	ATRAID,ENSG00000138085.16,chr2:27212027-27217178	ATRAID	5
chr2	24466512	24467464	-24925	NCOA1,ENSG00000084676.15,chr2:24491914-24770702	NCOA1	5
chr2	24362082	24362657	1654	ITSN2,ENSG00000198399.14,chr2:24202864-24360714	ITSN2	5
chr2	15932965	15934302	-6930	MYCN,ENSG00000134323.10,chr2:15940564-15947007	MYCN	5
chr2	15927355	15927985	7272	MYCNUT,ENSG00000223850.1,chr2:15920399-15936017	MYCNUT	5
chr2	1775384	1776296	30987	PXDN,ENSG00000130508.10,chr2:1631887-1744852	PXDN	5
chr2	1686565	1687049	-58046	PXDN,ENSG00000130508.10,chr2:1631887-1744852	PXDN	5
chr2	1685678	1686394	-58817	PXDN,ENSG00000130508.10,chr2:1631887-1744852	PXDN	5
chr19	50747006	50747491	-11133	GPR32P1,ENSG00000269565.1,chr19:50758382-50759192	GPR32P1	5
chr19	29773748	29774639	-37704	CCNE1,ENSG00000105173.13,chr19:29811898-29824308	CCNE1	5
chr19	14437387	14437915	4599	PKN1,ENSG00000123143.12,chr19:14433053-14471867	PKN1	5
chr19	4212351	4212806	-16919	EBI3,ENSG00000105246.5,chr19:4229498-4237531	EBI3	5
chr19	4210135	4210736	-19062	EBI3,ENSG00000105246.5,chr19:4229498-4237531	EBI3	5
chr19	4208444	4209045	-20753	EBI3,ENSG00000105246.5,chr19:4229498-4237531	EBI3	5
chr19	2983438	2984163	6355	TLE6,ENSG00000104953.18,chr19:2977446-2995184	TLE6	5
chr19	883666	884344	-9214	MED16,ENSG00000175221.14,chr19:867630-893218	MED16	5
chr18	67525218	67525738	8497	DSEL,ENSG00000171451.13,chr18:67506582-67516980	DSEL	5
chr18	54235691	54236277	11195	MBD2,ENSG00000134046.11,chr18:54151601-54224788	MBD2	5
chr18	35515621	35516359	17998	INO80C,ENSG00000153391.15,chr18:35452230-35497991	INO80C	5
chr17	78958635	78959233	-21176	LGALS3BP,ENSG00000108679.12,chr17:78971238-78980109	LGALS3BP	5
chr17	78940670	78941136	15515	TIMP2,ENSG00000035862.12,chr17:78852977-78925387	TIMP2	5
chr17	76262732	76263335	-2168	UBALD2,ENSG00000185262.8,chr17:76265202-76271299	UBALD2	5
chr17	65531283	65532126	-29944	AXIN2,ENSG00000168646.12,chr17:65528563-65561647	AXIN2	5
chr17	56699158	56699922	105842	NOG,ENSG00000183691.4,chr17:56593699-56595590	NOG	5
chr17	41535830	41536481	7846	KRT19,ENSG00000171345.13,chr17:41523617-41528308	KRT19	5
chr17	19957993	19958629	-20033	AKAP10,ENSG00000108599.14,chr17:19904302-19978343	AKAP10	5
chr17	2406817	2407769	6174	MNT,ENSG00000070444.14,chr17:2384060-2401118	MNT	5
chr16	84618602	84619238	842	COTL1,ENSG00000103187.7,chr16:84565594-84618077	COTL1	5
chr16	66618571	66618924	14874	CMTM3,ENSG00000140931.19,chr16:66603874-66613892	CMTM3	5
chr16	66613983	66614729	10483	CMTM3,ENSG00000140931.19,chr16:66603874-66613892	CMTM3	5
chr16	55668307	55669134	13117	SLC6A2,ENSG00000103546.18,chr16:55655604-55706192	SLC6A2	5
chr16	55663523	55664457	8387	SLC6A2,ENSG00000103546.18,chr16:55655604-55706192	SLC6A2	5
chr16	53430527	53431018	-3204	RBL2,ENSG00000103479.14,chr16:53433977-53491649	RBL2	5
chr16	53418679	53419628	-14823	RBL2,ENSG00000103479.14,chr16:53433977-53491649	RBL2	5
chr16	19175485	19176189	7867	SYT17,ENSG00000103528.16,chr16:19167971-19268334	SYT17	5
chr16	2719136	2719608	-1180	PRSS27,ENSG00000172382.9,chr16:2712418-2720551	PRSS27	5
chr16	316599	317609	33953	PDIA2,ENSG00000185615.15,chr16:283152-287215	PDIA2	5
chr15	90097954	90098759	-4149	IDH2,ENSG00000182054.9,chr15:90083045-90102504	IDH2	5
chr15	88810443	88811166	7362	ACAN,ENSG00000157766.15,chr15:88803443-88875354	ACAN	5
chr15	80679452	80680145	115	ABHD17C,ENSG00000136379.11,chr15:80679684-80755621	ABHD17C	5
chr15	67096763	67097594	33416	SMAD3,ENSG00000166949.15,chr15:67063763-67195195	SMAD3	5
chr15	62999981	63000435	-42423	TPM1,ENSG00000140416.19,chr15:63042632-63071915	TPM1	5
chr15	59380768	59381513	8239	MYO1E,ENSG00000157483.8,chr15:59132434-59372900	MYO1E	5
chr15	31351344	31351790	24713	KLF13,ENSG00000169926.9,chr15:31326855-31435665	KLF13	5
chr14	103129631	103130286	6517	TNFAIP2,ENSG00000185215.8,chr14:103123442-103137439	TNFAIP2	5
chr14	102795101	102796358	18254	TRAF3,ENSG00000131323.14,chr14:102777476-102911500	TRAF3	5
chr14	95475547	95476426	149	SYNE3,ENSG00000176438.12,chr14:95407266-95475836	SYNE3	5
chr14	95468509	95469407	-6879	SYNE3,ENSG00000176438.12,chr14:95407266-95475836	SYNE3	5
chr14	80564640	80565572	177348	DIO2,ENSG00000211448.11,chr14:80197527-80387757	DIO2	5
chr14	80390705	80391265	3227	DIO2,ENSG00000211448.11,chr14:80197527-80387757	DIO2	5
chr14	77490456	77491149	-8049	ISM2,ENSG00000100593.17,chr14:77474394-77498850	ISM2	5
chr13	110286694	110287710	-18609	COL4A2,ENSG00000134871.17,chr13:110305812-110513027	COL4A2	5
chr13	97256383	97256802	35159	MBNL2,ENSG00000139793.18,chr13:97221434-97394120	MBNL2	5
chr13	97222093	97222657	942	MBNL2,ENSG00000139793.18,chr13:97221434-97394120	MBNL2	5
chr13	46616992	46618359	64508	LRCH1,ENSG00000136141.14,chr13:46553168-46753040	LRCH1	5
chr13	46536612	46537157	-16283	LRCH1,ENSG00000136141.14,chr13:46553168-46753040	LRCH1	5
chr12	105231414	105231758	-3703	C12orf75,ENSG00000235162.8,chr12:105235290-105396097	C12orf75	5
chr12	104142478	104142912	4405	NFYB,ENSG00000120837.7,chr12:104117077-104138289	NFYB	5
chr12	56085878	56086904	6535	ERBB3,ENSG00000065361.14,chr12:56079857-56103505	ERBB3	5
chr11	86370828	86371558	-3542	CCDC81,ENSG00000149201.9,chr11:86374736-86423109	CCDC81	5
chr11	68013188	68013576	4805	ALDH3B1,ENSG00000006534.15,chr11:68008578-68029282	ALDH3B1	5
chr11	60960395	60960892	8112	SLC15A3,ENSG00000110446.9,chr11:60937083-60952530	SLC15A3	5
chr11	60941834	60942768	-10230	SLC15A3,ENSG00000110446.9,chr11:60937083-60952530	SLC15A3	5
chr11	13436602	13437140	-26427	BTBD10,ENSG00000148925.10,chr11:13388001-13463297	BTBD10	5
chr11	12723510	12724262	49296	TEAD1,ENSG00000187079.14,chr11:12674591-12944483	TEAD1	5
chr11	12696691	12697290	22400	TEAD1,ENSG00000187079.14,chr11:12674591-12944483	TEAD1	5
chr11	12686629	12688145	12797	TEAD1,ENSG00000187079.14,chr11:12674591-12944483	TEAD1	5
chr11	7540895	7541537	27919	PPFIBP2,ENSG00000166387.11,chr11:7513298-7657127	PPFIBP2	5
chr11	2889420	2889953	3804	CDKN1C,ENSG00000129757.12,chr11:2883213-2885881	CDKN1C	5
chr11	2256677	2258012	-13609	ASCL2,ENSG00000183734.4,chr11:2268495-2270952	ASCL2	5
chr11	2234876	2235676	-35677	ASCL2,ENSG00000183734.4,chr11:2268495-2270952	ASCL2	5
chr11	1834036	1834576	-4682	TNNI2,ENSG00000130598.15,chr11:1838989-1841680	TNNI2	5
chr10	133274803	133276067	-1434	ADAM8,ENSG00000151651.15,chr10:133262403-133276868	ADAM8	5
chr10	127345009	127346375	149533	FAM196A,ENSG00000188916.8,chr10:127135426-127196158	FAM196A	5
chr10	125915439	125916197	19280	FANK1,ENSG00000203780.10,chr10:125896539-126009592	FANK1	5
chr1	234451592	234452367	-27125	TARBP1,ENSG00000059588.9,chr1:234391313-234479103	TARBP1	5
chr1	230106709	230107480	49105	GALNT2,ENSG00000143641.9,chr1:230057990-230282124	GALNT2	5
chr1	230104660	230105217	46949	GALNT2,ENSG00000143641.9,chr1:230057990-230282124	GALNT2	5
chr1	207316632	207317067	-4658	CD55,ENSG00000196352.13,chr1:207321508-207360966	CD55	5
chr1	198107023	198107589	-49656	NEK7,ENSG00000151414.14,chr1:198156963-198322420	NEK7	5
chr1	198068554	198069334	-88018	NEK7,ENSG00000151414.14,chr1:198156963-198322420	NEK7	5
chr1	156006610	156007359	-87	ARHGEF2,ENSG00000116584.17,chr1:155946851-156007070	ARHGEF2	5
chr1	43493755	43494375	-31121	PTPRF,ENSG00000142949.16,chr1:43525187-43623666	PTPRF	5
chr1	42369432	42369859	-11149	RIMKLA,ENSG00000177181.14,chr1:42380795-42422578	RIMKLA	5
chr1	36150734	36151156	-4633	MAP7D1,ENSG00000116871.15,chr1:36155579-36180849	MAP7D1	5
chr1	21930946	21931474	-6088	HSPG2,ENSG00000142798.16,chr1:21822245-21937297	HSPG2	5
chr1	17475711	17476284	36272	RCC2,ENSG00000179051.13,chr1:17406760-17439724	RCC2	5
chr1	11955006	11955779	21188	PLOD1,ENSG00000083444.16,chr1:11934205-11975538	PLOD1	5
chr1	3460611	3461131	6446	ARHGEF16,ENSG00000130762.14,chr1:3454426-3481113	ARHGEF16	5
chr9	35026143	35027058	-14494	C9orf131,ENSG00000174038.12,chr9:35041095-35045991	C9orf131	6
chr8	142788306	142789812	2466	LY6D,ENSG00000167656.4,chr8:142784880-142786592	LY6D	6
chr8	133532713	133533854	-38658	ST3GAL1,ENSG00000008513.14,chr8:133454848-133571940	ST3GAL1	6
chr8	124965664	124966412	-7259	ZNF572,ENSG00000180938.5,chr8:124973298-124979389	ZNF572	6
chr8	102896737	102897046	3026	AZIN1,ENSG00000155096.13,chr8:102826357-102893864	AZIN1	6
chr8	42914457	42915382	17628	RNF170,ENSG00000120925.13,chr8:42849637-42897290	RNF170	6
chr8	37838667	37839316	-10914	BRF2,ENSG00000104221.12,chr8:37843268-37849904	BRF2	6
chr8	11874541	11874977	5310	CTSB,ENSG00000164733.20,chr8:11842524-11869448	CTSB	6
chr8	6576704	6577398	13641	ANGPT2,ENSG00000091879.13,chr8:6499651-6563409	ANGPT2	6
chr8	6558458	6559165	-4599	ANGPT2,ENSG00000091879.13,chr8:6499651-6563409	ANGPT2	6
chr8	6547287	6548014	-15760	ANGPT2,ENSG00000091879.13,chr8:6499651-6563409	ANGPT2	6
chr7	142898890	142899237	13300	TRPV6,ENSG00000165125.17,chr7:142871203-142885762	TRPV6	6
chr7	87767517	87768341	54605	ABCB1,ENSG00000085563.14,chr7:87503633-87713323	ABCB1	6
chr7	87714215	87715053	1310	ABCB1,ENSG00000085563.14,chr7:87503633-87713323	ABCB1	6
chr7	77684006	77684489	-12019	APTR,ENSG00000214293.8,chr7:77657660-77696265	APTR	6
chr7	66626351	66626935	-2237	KCTD7,ENSG00000243335.8,chr7:66628881-66811187	KCTD7	6
chr7	55096691	55097367	78009	EGFR,ENSG00000146648.15,chr7:55019021-55256620	EGFR	6
chr7	55066584	55067409	47976	EGFR,ENSG00000146648.15,chr7:55019021-55256620	EGFR	6
chr7	55065636	55066195	46895	EGFR,ENSG00000146648.15,chr7:55019021-55256620	EGFR	6
chr7	55043183	55044035	24589	EGFR,ENSG00000146648.15,chr7:55019021-55256620	EGFR	6
chr7	54985439	54986059	-33271	EGFR,ENSG00000146648.15,chr7:55019021-55256620	EGFR	6
chr7	54980079	54980865	-38548	EGFR,ENSG00000146648.15,chr7:55019021-55256620	EGFR	6
chr7	50580075	50580627	14893	DDC,ENSG00000132437.17,chr7:50458436-50565457	DDC	6
chr7	50555735	50556130	-9526	DDC,ENSG00000132437.17,chr7:50458436-50565457	DDC	6
chr7	50553947	50554323	-11323	DDC,ENSG00000132437.17,chr7:50458436-50565457	DDC	6
chr7	48084716	48085343	-3598	UPP1,ENSG00000183696.13,chr7:48088628-48108733	UPP1	6
chr7	48074131	48074922	-14101	UPP1,ENSG00000183696.13,chr7:48088628-48108733	UPP1	6
chr6	143064943	143065322	4637	AIG1,ENSG00000146416.16,chr6:143060496-143340304	AIG1	6
chr6	137241573	137242047	22360	IFNGR1,ENSG00000027697.12,chr6:137197484-137219449	IFNGR1	6
chr6	134077428	134078152	25153	SLC2A12,ENSG00000146411.5,chr6:133988697-134052636	SLC2A12	6
chr6	134060173	134061063	7981	SLC2A12,ENSG00000146411.5,chr6:133988697-134052636	SLC2A12	6
chr6	41757965	41759010	4377	PGC,ENSG00000096088.16,chr6:41736711-41754109	PGC	6
chr6	31948750	31949312	3382	CFB,ENSG00000243649.8,chr6:31945650-31952084	CFB	6
chr6	26067421	26067872	11217	HIST1H1C,ENSG00000187837.3,chr6:26055787-26056428	HIST1H1C	6
chr6	17417575	17418674	24909	CAP2,ENSG00000112186.11,chr6:17393216-17557792	CAP2	6
chr6	17389340	17390349	-3371	CAP2,ENSG00000112186.11,chr6:17393216-17557792	CAP2	6
chr5	176418271	176418647	1889	CLTB,ENSG00000175416.12,chr5:176392455-176416569	CLTB	6
chr5	173880329	173880963	-7633	CPEB4,ENSG00000113742.12,chr5:173888280-173961976	CPEB4	6
chr5	173868166	173868882	-19755	CPEB4,ENSG00000113742.12,chr5:173888280-173961976	CPEB4	6
chr5	151072321	151073065	-20885	TNIP1,ENSG00000145901.14,chr5:151029945-151093577	TNIP1	6
chr5	150112222	150113615	-455	CSF1R,ENSG00000182578.13,chr5:150053291-150113372	CSF1R	6
chr5	150107811	150108467	-5234	CSF1R,ENSG00000182578.13,chr5:150053291-150113372	CSF1R	6
chr5	95712360	95712832	-925	RHOBTB3,ENSG00000164292.12,chr5:95713522-95824383	RHOBTB3	6
chr5	95697750	95698728	-473	SPATA9,ENSG00000145757.15,chr5:95652181-95698711	SPATA9	6
chr5	79974940	79975915	-15836	MTX3,ENSG00000177034.14,chr5:79976731-79991262	MTX3	6
chr4	168337251	168338330	18982	DDX60,ENSG00000137628.16,chr4:168216293-168318807	DDX60	6
chr4	168304603	168305399	-13807	DDX60,ENSG00000137628.16,chr4:168216293-168318807	DDX60	6
chr4	86926304	86926866	-8416	AFF1,ENSG00000172493.20,chr4:86935002-87141054	AFF1	6
chr4	75561584	75562470	5980	C4orf26,ENSG00000174792.10,chr4:75556048-75565885	C4orf26	6
chr4	37471838	37472381	18169	C4orf19,ENSG00000154274.14,chr4:37453941-37623495	C4orf19	6
chr4	37440020	37440866	-13497	C4orf19,ENSG00000154274.14,chr4:37453941-37623495	C4orf19	6
chr3	196142296	196143674	350	LINC00885,ENSG00000224652.1,chr3:196142636-196160890	LINC00885	6
chr3	194921856	194922201	94139	AC090505.1,ENSG00000238031.1,chr3:194827890-194832592	AC090505.1	6
chr3	194852032	194853705	24979	AC090505.1,ENSG00000238031.1,chr3:194827890-194832592	AC090505.1	6
chr3	194706429	194707082	1208	AC106706.1,ENSG00000233987.1,chr3:194705548-194706964	AC106706.1	6
chr3	155022750	155023215	-1141	MME,ENSG00000196549.10,chr3:155024124-155183729	MME	6
chr3	138390093	138390745	42772	MRAS,ENSG00000158186.12,chr3:138347648-138405534	MRAS	6
chr3	138383762	138384430	36449	MRAS,ENSG00000158186.12,chr3:138347648-138405534	MRAS	6
chr3	111669696	111670486	-4584	PLCXD2,ENSG00000240891.6,chr3:111674676-111846447	PLCXD2	6
chr3	72492064	72492944	45585	RYBP,ENSG00000163602.9,chr3:72371825-72446918	RYBP	6
chr3	72475256	72476046	28732	RYBP,ENSG00000163602.9,chr3:72371825-72446918	RYBP	6
chr3	56590626	56591215	33760	CCDC66,ENSG00000180376.16,chr3:56557161-56621818	CCDC66	6
chr3	50624534	50624994	12932	CISH,ENSG00000114737.15,chr3:50606490-50611831	CISH	6
chr3	49512510	49513513	-41356	BSN-AS2,ENSG00000226913.1,chr3:49549306-49554366	BSN-AS2	6
chr22	46229758	46230472	-20565	CDPF1,ENSG00000205643.10,chr22:46244011-46250679	CDPF1	6
chr22	38802701	38803179	8741	DNAL4,ENSG00000100246.12,chr22:38778508-38794198	DNAL4	6
chr21	39737337	39738204	-7636	IGSF5,ENSG00000183067.5,chr21:39745407-39802096	IGSF5	6
chr21	39321329	39322279	244	BRWD1,ENSG00000185658.13,chr21:39184176-39321559	BRWD1	6
chr20	38198287	38198890	32009	TGM2,ENSG00000198959.11,chr20:38127387-38166578	TGM2	6
chr20	38180426	38181639	14453	TGM2,ENSG00000198959.11,chr20:38127387-38166578	TGM2	6
chr20	38168000	38168580	1711	TGM2,ENSG00000198959.11,chr20:38127387-38166578	TGM2	6
chr20	38166345	38166773	-20	TGM2,ENSG00000198959.11,chr20:38127387-38166578	TGM2	6
chr20	370280	370615	7613	TRIB3,ENSG00000101255.10,chr20:362835-397559	TRIB3	6
chr2	150526795	150527211	-12009	RND3,ENSG00000115963.13,chr2:150468195-150539011	RND3	6
chr2	150525729	150526316	-12990	RND3,ENSG00000115963.13,chr2:150468195-150539011	RND3	6
chr2	85584881	85585583	825	VAMP5,ENSG00000168899.4,chr2:85584408-85593412	VAMP5	6
chr2	71696894	71697782	243617	DYSF,ENSG00000135636.13,chr2:71453722-71686768	DYSF	6
chr2	71643787	71644393	190369	DYSF,ENSG00000135636.13,chr2:71453722-71686768	DYSF	6
chr2	71498248	71498735	44770	DYSF,ENSG00000135636.13,chr2:71453722-71686768	DYSF	6
chr2	71458845	71459535	5469	DYSF,ENSG00000135636.13,chr2:71453722-71686768	DYSF	6
chr2	20231324	20233275	6865	SDC1,ENSG00000115884.10,chr2:20200797-20225433	SDC1	6
chr2	20144884	20146037	-10598	AC098828.3,ENSG00000213729.3,chr2:20155618-20156057	AC098828.3	6
chr2	20143305	20143710	-12551	AC098828.3,ENSG00000213729.3,chr2:20155618-20156057	AC098828.3	6
chr2	20138503	20139230	-17192	AC098828.3,ENSG00000213729.3,chr2:20155618-20156057	AC098828.3	6
chr19	55074173	55074647	2391	EPS8L1,ENSG00000131037.14,chr19:55072020-55087923	EPS8L1	6
chr19	54489360	54490140	-8128	LAIR2,ENSG00000167618.9,chr19:54497879-54510687	LAIR2	6
chr19	43200981	43202090	-5765	PSG4,ENSG00000243137.7,chr19:43192702-43207299	PSG4	6
chr19	43002920	43004163	-22972	PSG11,ENSG00000243130.7,chr19:43007656-43026512	PSG11	6
chr19	42899290	42900044	19844	PSG1,ENSG00000231924.9,chr19:42866464-42879822	PSG1	6
chr19	42898639	42899123	19058	PSG1,ENSG00000231924.9,chr19:42866464-42879822	PSG1	6
chr19	42874957	42875698	-4496	PSG1,ENSG00000231924.9,chr19:42866464-42879822	PSG1	6
chr19	39709048	39709824	5131	LGALS14,ENSG00000006659.12,chr19:39704306-39709444	LGALS14	6
chr19	33251370	33252020	25844	SLC7A10,ENSG00000130876.11,chr19:33208664-33225850	SLC7A10	6
chr19	18520138	18520820	-1649	ELL,ENSG00000105656.12,chr19:18442663-18522127	ELL	6
chr19	18361638	18362280	-12771	GDF15,ENSG00000130513.6,chr19:18374731-18389176	GDF15	6
chr19	11066144	11066973	-22803	LDLR,ENSG00000130164.11,chr19:11089362-11133816	LDLR	6
chr19	10911264	10912050	-17025	YIPF2,ENSG00000130733.10,chr19:10922185-10928681	YIPF2	6
chr19	6783651	6784215	11220	VAV1,ENSG00000141968.7,chr19:6772714-6857366	VAV1	6
chr19	5857495	5858240	6392	FUT3,ENSG00000171124.12,chr19:5842888-5851474	FUT3	6
chr17	75908195	75908613	2990	MRPL38,ENSG00000204316.12,chr17:75898643-75905413	MRPL38	6
chr17	75844246	75845672	241	UNC13D,ENSG00000092929.11,chr17:75827225-75844717	UNC13D	6
chr17	64992356	64992884	17043	AMZ2P1,ENSG00000214174.8,chr17:64966550-64975576	AMZ2P1	6
chr17	42545822	42546843	-431	HSD17B1P1,ENSG00000108785.7,chr17:42546764-42548706	HSD17B1P1	6
chr17	30450567	30451333	-26411	GOSR1,ENSG00000108587.14,chr17:30477362-30527592	GOSR1	6
chr17	28343614	28345041	8726	TNFAIP1,ENSG00000109079.9,chr17:28335602-28347009	TNFAIP1	6
chr17	8781861	8782708	-17066	MFSD6L,ENSG00000185156.5,chr17:8797162-8799349	MFSD6L	6
chr16	73253738	73254375	22002	AC140912.1,ENSG00000261227.2,chr16:73232055-73233970	AC140912.1	6
chr16	69404387	69404867	-3945	TERF2,ENSG00000132604.10,chr16:69355561-69408571	TERF2	6
chr15	43163618	43164009	-21304	CCNDBP1,ENSG00000166946.13,chr15:43185118-43197176	CCNDBP1	6
chr15	34182924	34183473	-26899	KATNBL1,ENSG00000134152.10,chr15:34140674-34210096	KATNBL1	6
chr14	95265260	95266033	-54261	CLMN,ENSG00000165959.11,chr14:95181940-95319906	CLMN	6
chr14	92785497	92786510	-8227	GOLGA5,ENSG00000066455.12,chr14:92794231-92839963	GOLGA5	6
chr14	92649814	92650657	-98468	LGMN,ENSG00000100600.14,chr14:92703807-92748702	LGMN	6
chr14	92644008	92644799	-104300	LGMN,ENSG00000100600.14,chr14:92703807-92748702	LGMN	6
chr14	75521417	75522003	-714	BATF,ENSG00000156127.6,chr14:75522425-75547015	BATF	6
chr13	49313723	49314514	66194	CDADC1,ENSG00000102543.14,chr13:49247925-49293485	CDADC1	6
chr13	30743307	30744096	30224	ALOX5AP,ENSG00000132965.9,chr13:30713478-30764426	ALOX5AP	6
chr12	124828297	124829673	-53684	SCARB1,ENSG00000073060.15,chr12:124776856-124882668	SCARB1	6
chr12	80213041	80214776	4456	OTOGL,ENSG00000165899.10,chr12:80209453-80379090	OTOGL	6
chr12	51925304	51926699	19094	ACVRL1,ENSG00000139567.12,chr12:51906908-51923361	ACVRL1	6
chr11	121280756	121281926	-11111	SC5D,ENSG00000109929.9,chr11:121292453-121308694	SC5D	6
chr11	120353727	120354446	-11579	7SK,ENSG00000274303.1,chr11:120365666-120365963	7SK	6
chr11	120301619	120302435	-23101	TMEM136,ENSG00000181264.8,chr11:120325129-120333682	TMEM136	6
chr11	120214549	120215007	4012	OAF,ENSG00000184232.8,chr11:120210767-120230332	OAF	6
chr11	66011193	66011838	-325	CST6,ENSG00000175315.2,chr11:66011841-66013505	CST6	6
chr11	62875671	62876081	19775	SLC3A2,ENSG00000168003.16,chr11:62856102-62888875	SLC3A2	6
chr11	33723983	33724701	-12104	CD59,ENSG00000085063.14,chr11:33698261-33736445	CD59	6
chr11	9740253	9740926	-17702	SBF2-AS1,ENSG00000246273.6,chr11:9758292-9811319	SBF2-AS1	6
chr10	126692418	126692890	22207	C10orf90,ENSG00000154493.17,chr10:126424997-126670446	C10orf90	6
chr10	118769095	118769898	14246	CACUL1,ENSG00000151893.14,chr10:118674167-118755249	CACUL1	6
chr10	87845127	87846492	4465	ATAD1,ENSG00000138138.13,chr10:87751512-87841343	ATAD1	6
chr10	84293016	84294054	13556	LINC00858,ENSG00000229404.5,chr10:84279980-84294659	LINC00858	6
chr1	223119163	223119930	-23737	TLR5,ENSG00000187554.11,chr1:223109406-223143282	TLR5	6
chr1	211236721	211237226	-21403	RCOR3,ENSG00000117625.13,chr1:211258377-211316385	RCOR3	6
chr1	204479651	204480245	-14777	PIK3C2B,ENSG00000133056.13,chr1:204422628-204494724	PIK3C2B	6
chr1	204448451	204449281	37074	PPP1R15B,ENSG00000158615.8,chr1:204403387-204411791	PPP1R15B	6
chr1	204417170	204418696	6141	PPP1R15B,ENSG00000158615.8,chr1:204403387-204411791	PPP1R15B	6
chr1	204203340	204203731	7048	KISS1,ENSG00000170498.8,chr1:204190341-204196486	KISS1	6
chr1	175178113	175178855	-14516	KIAA0040,ENSG00000235750.9,chr1:175156987-175192999	KIAA0040	6
chr1	169781061	169781987	-13443	METTL18,ENSG00000171806.11,chr1:169792529-169794966	METTL18	6
chr1	119786478	119786972	17819	HMGCS2,ENSG00000134240.11,chr1:119747996-119768905	HMGCS2	6
chr1	119731111	119731581	-37560	HMGCS2,ENSG00000134240.11,chr1:119747996-119768905	HMGCS2	6
chr1	44051957	44052609	20815	SLC6A9,ENSG00000196517.11,chr1:43991500-44031467	SLC6A9	6
chr1	32133139	32134056	25560	KPNA6,ENSG00000025800.13,chr1:32108038-32176568	KPNA6	6
chr1	31510917	31512142	-6905	LINC01226,ENSG00000223907.1,chr1:31518435-31524245	LINC01226	6
chr1	31416132	31416666	6835	SERINC2,ENSG00000168528.11,chr1:31409565-31434680	SERINC2	6
chr1	28343413	28344206	14808	MED18,ENSG00000130772.13,chr1:28329002-28335967	MED18	6
chr1	28341568	28341933	12749	MED18,ENSG00000130772.13,chr1:28329002-28335967	MED18	6
chr1	24724385	24725644	-20342	CLIC4,ENSG00000169504.14,chr1:24745357-24844324	CLIC4	6
chr1	24718851	24719392	-26235	CLIC4,ENSG00000169504.14,chr1:24745357-24844324	CLIC4	6
chr1	24712979	24713823	-31955	CLIC4,ENSG00000169504.14,chr1:24745357-24844324	CLIC4	6
chr1	23555906	23556651	-3517	ID3,ENSG00000117318.8,chr1:23557918-23559794	ID3	6
chr1	21511623	21512266	2573	ALPL,ENSG00000162551.13,chr1:21509372-21578412	ALPL	6
chr1	11821226	11821846	14615	MTHFR,ENSG00000177000.10,chr1:11785723-11806920	MTHFR	6
chr1	8004441	8005653	-21262	ERRFI1,ENSG00000116285.12,chr1:8004404-8026308	ERRFI1	6
chr1	2088169	2088849	38040	PRKCZ,ENSG00000067606.15,chr1:2050470-2185395	PRKCZ	6
chr1	1073718	1074568	-165	RNF223,ENSG00000237330.2,chr1:1070966-1074307	RNF223	6
chr1	845643	846027	18312	LINC00115,ENSG00000225880.5,chr1:826206-827522	LINC00115	6
