# Supplementary figures and images for: Derivation of trophoblast stem cells from naïve human pluripotent stem cells
Source: eLife journal article supplement (doi:10.7554/elife.52504), 2020-02-12

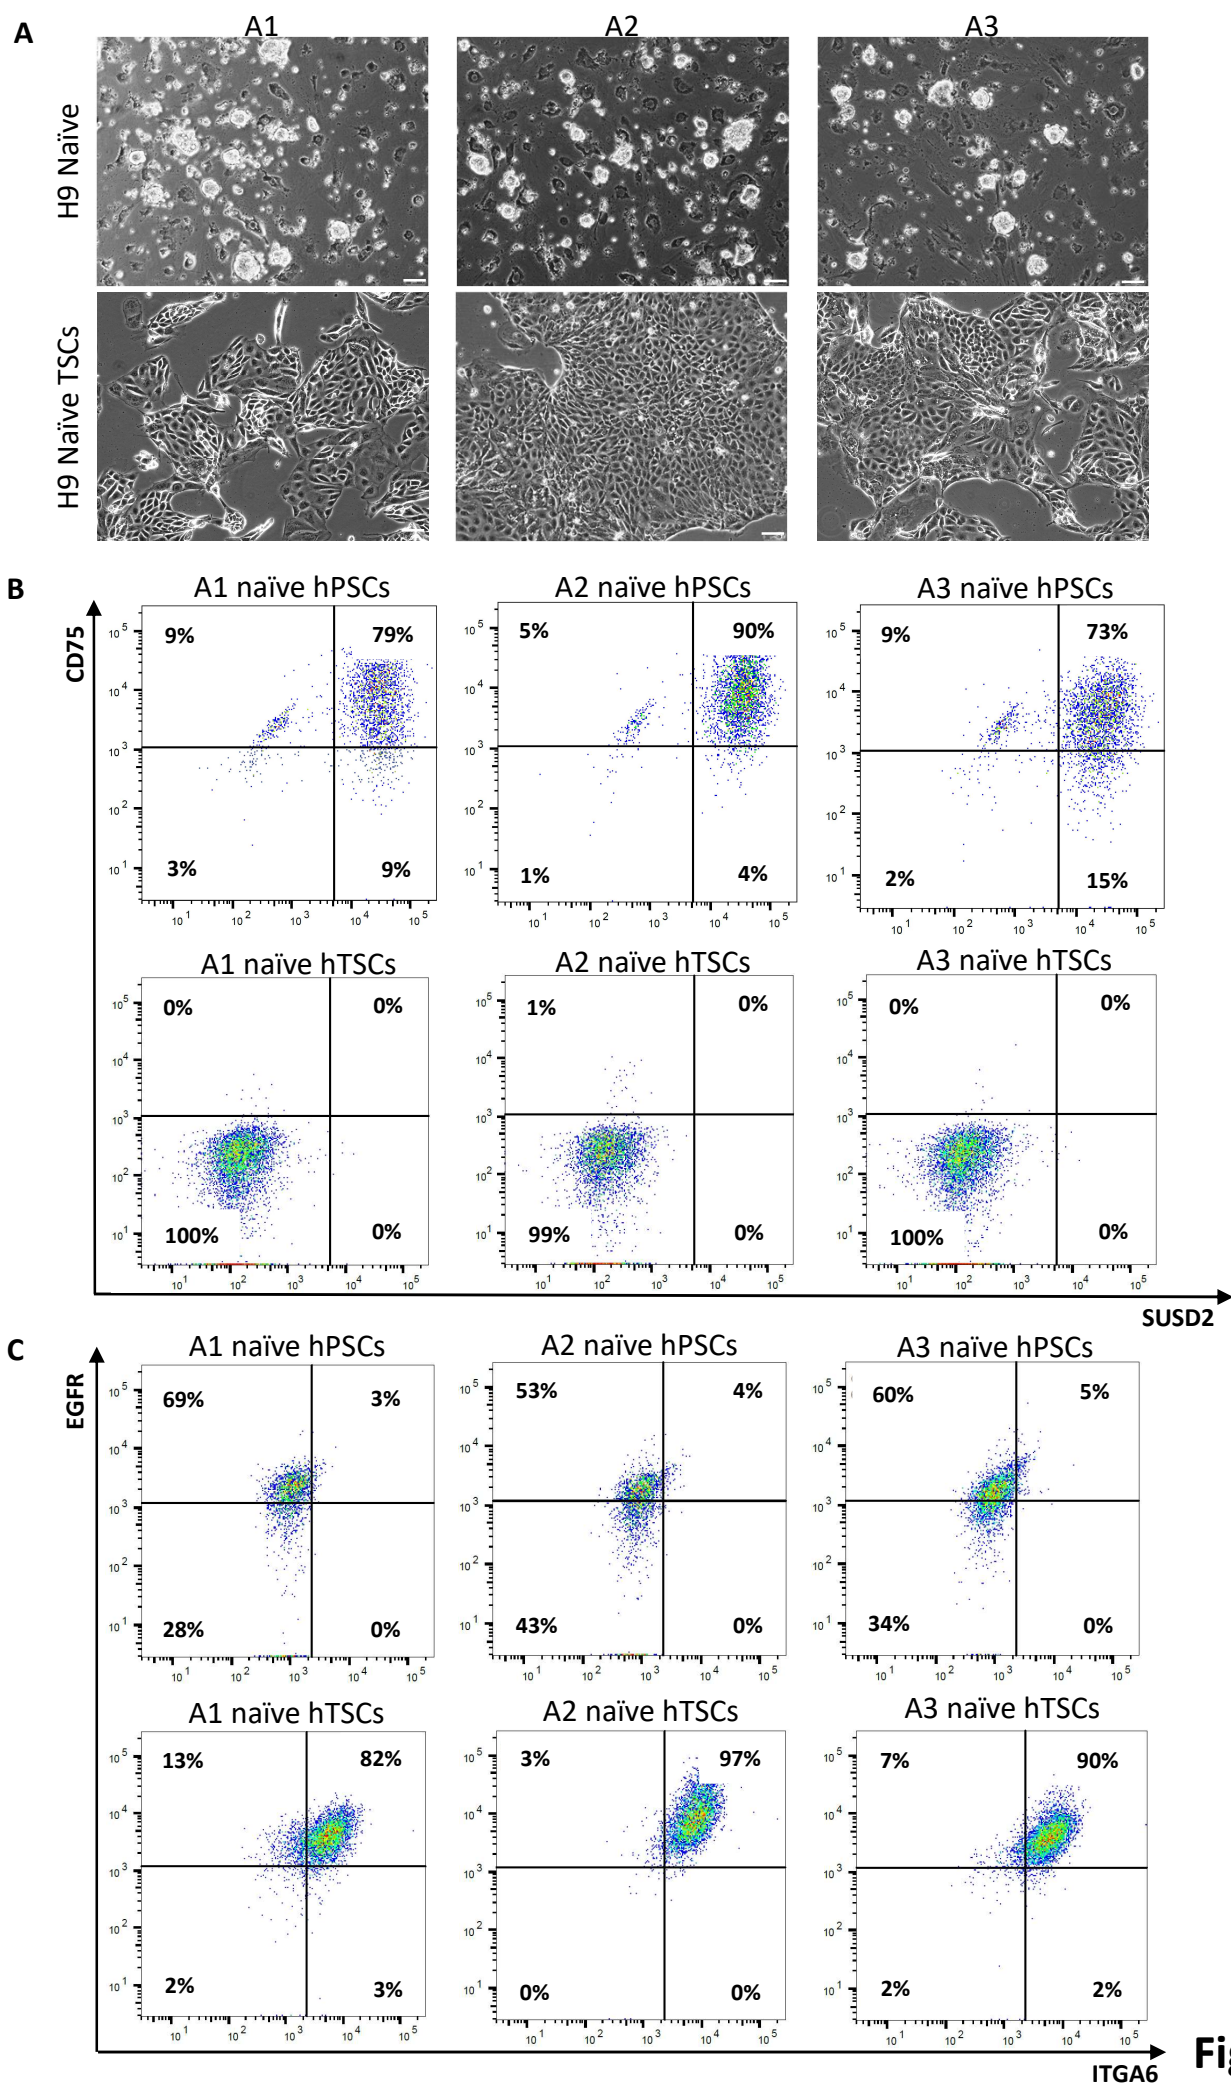

**Figure 2-S2**

Supplement: supp [file elife-52504-supp-v1.zip]

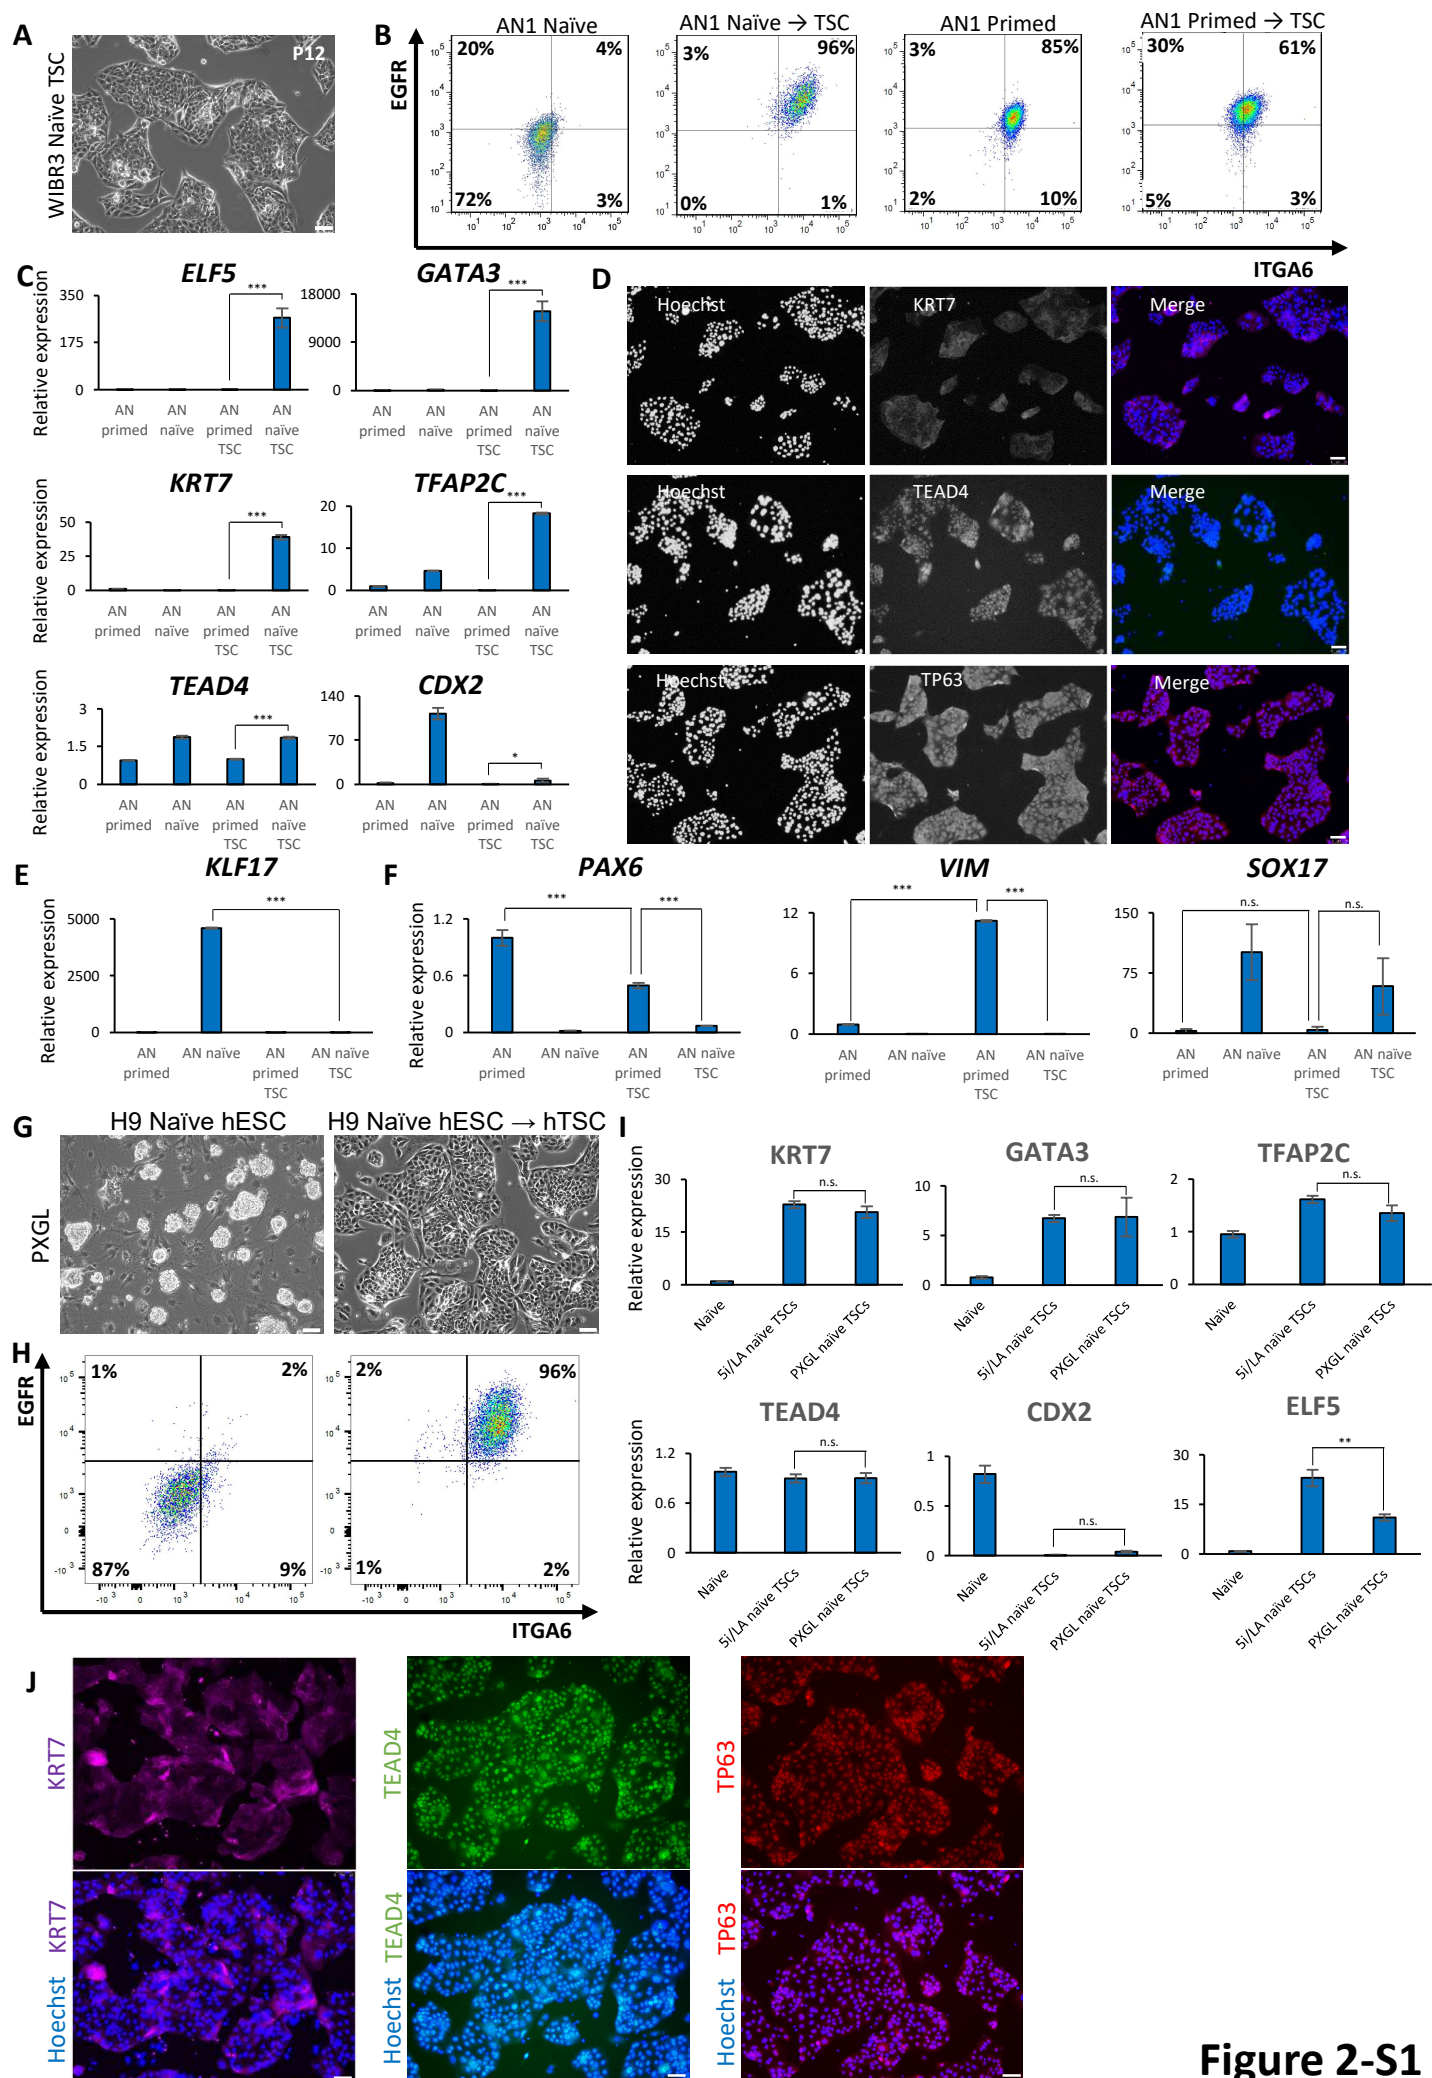

**Figure 2-S1**

Supplement: supp [file elife-52504-supp-v1.zip]

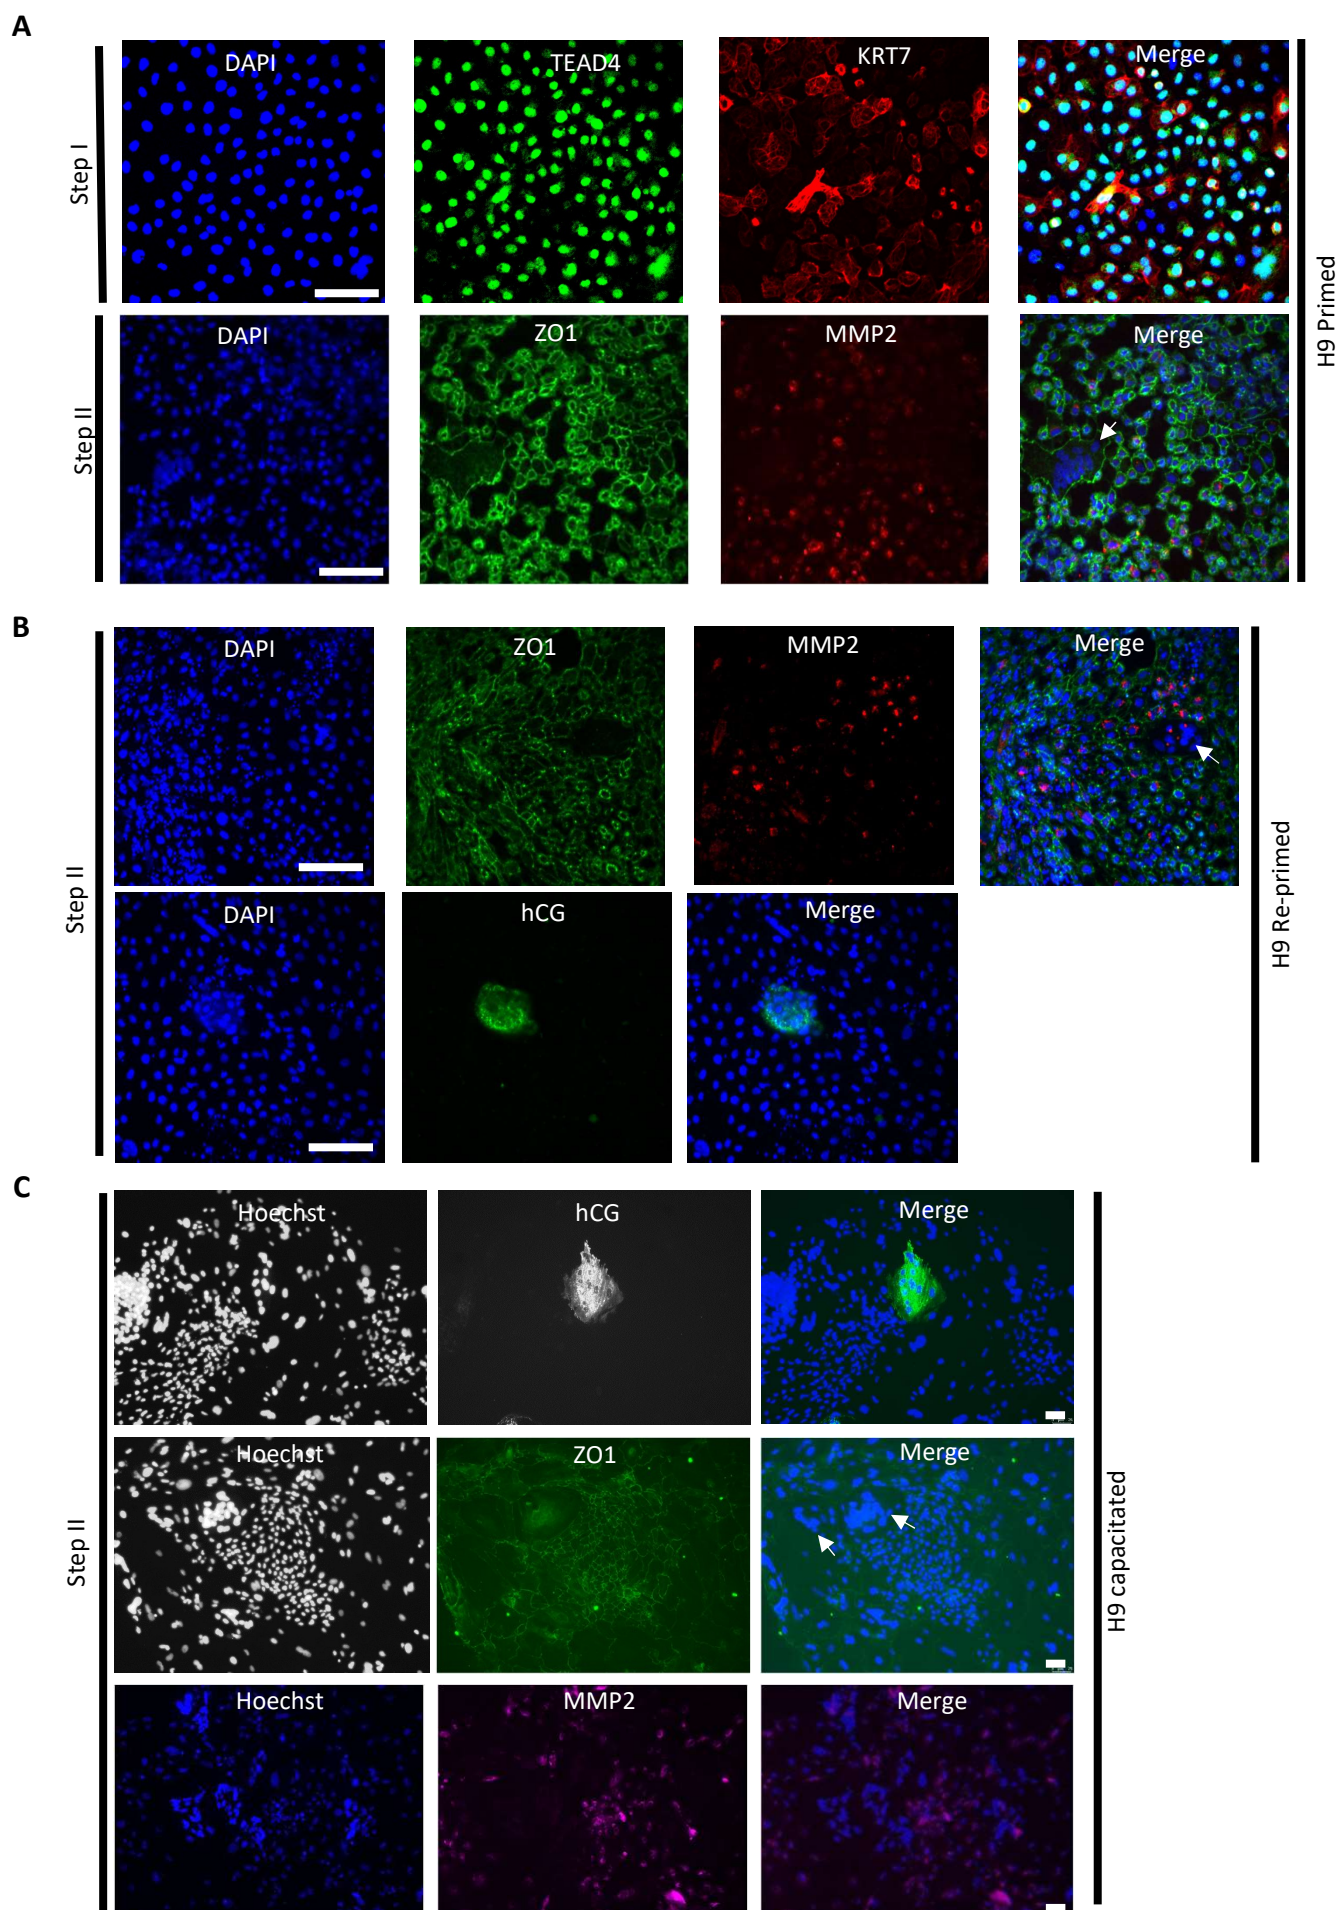

**Figure1- S2**

Supplement: supp [file elife-52504-supp-v1.zip]

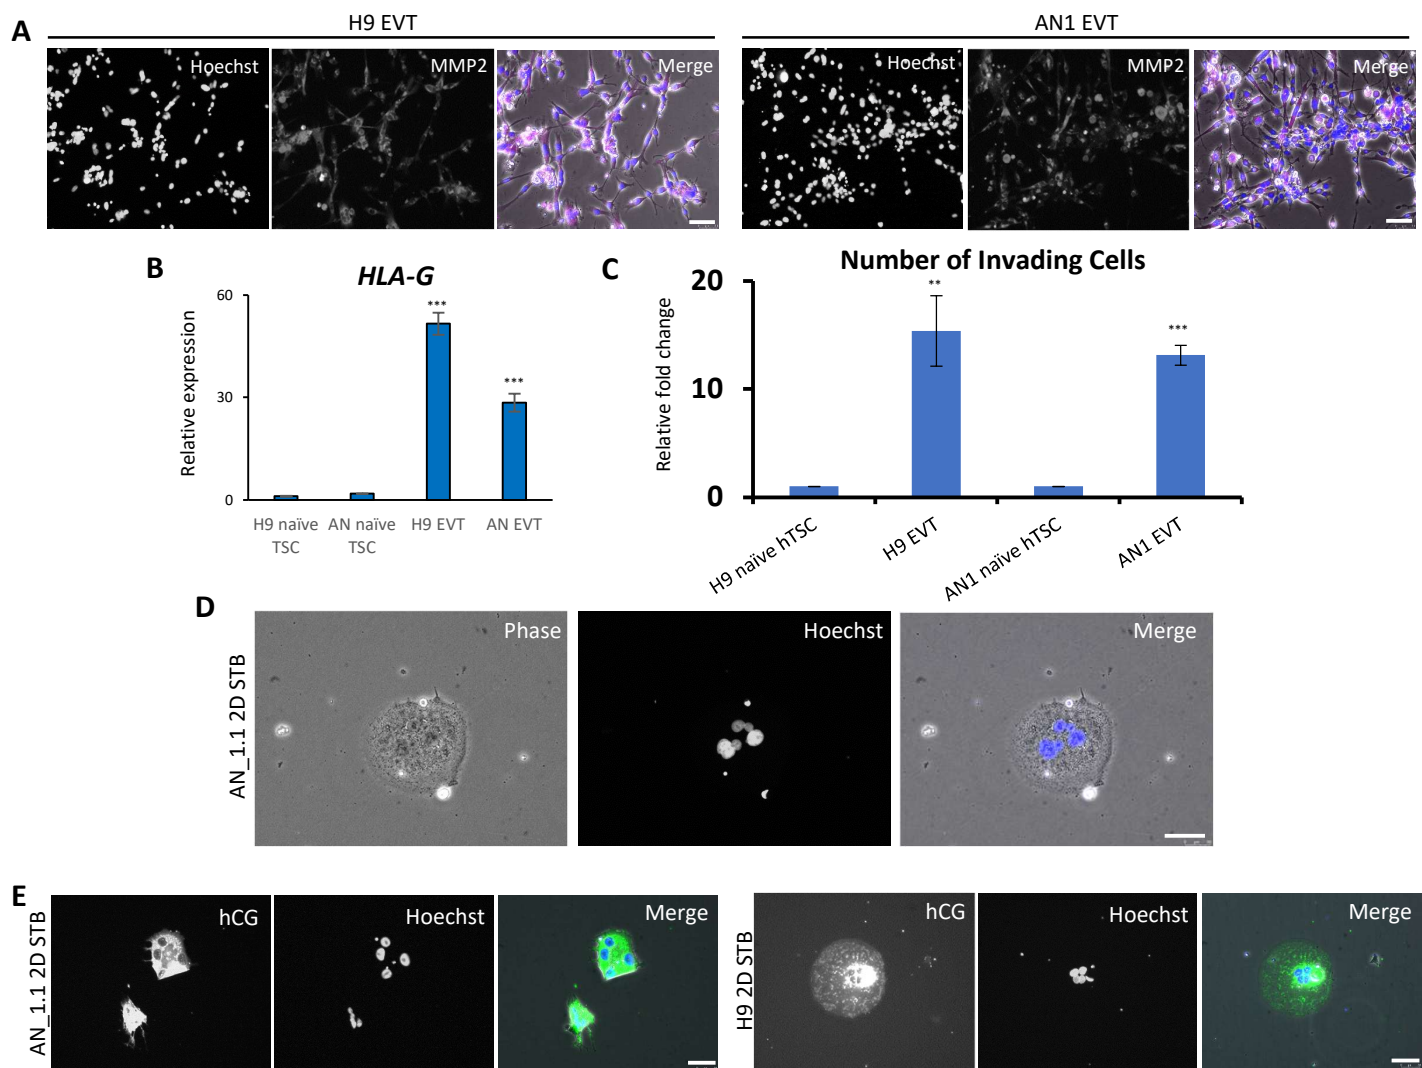

**Figure 3-S1**

Supplement: supp [file elife-52504-supp-v1.zip]

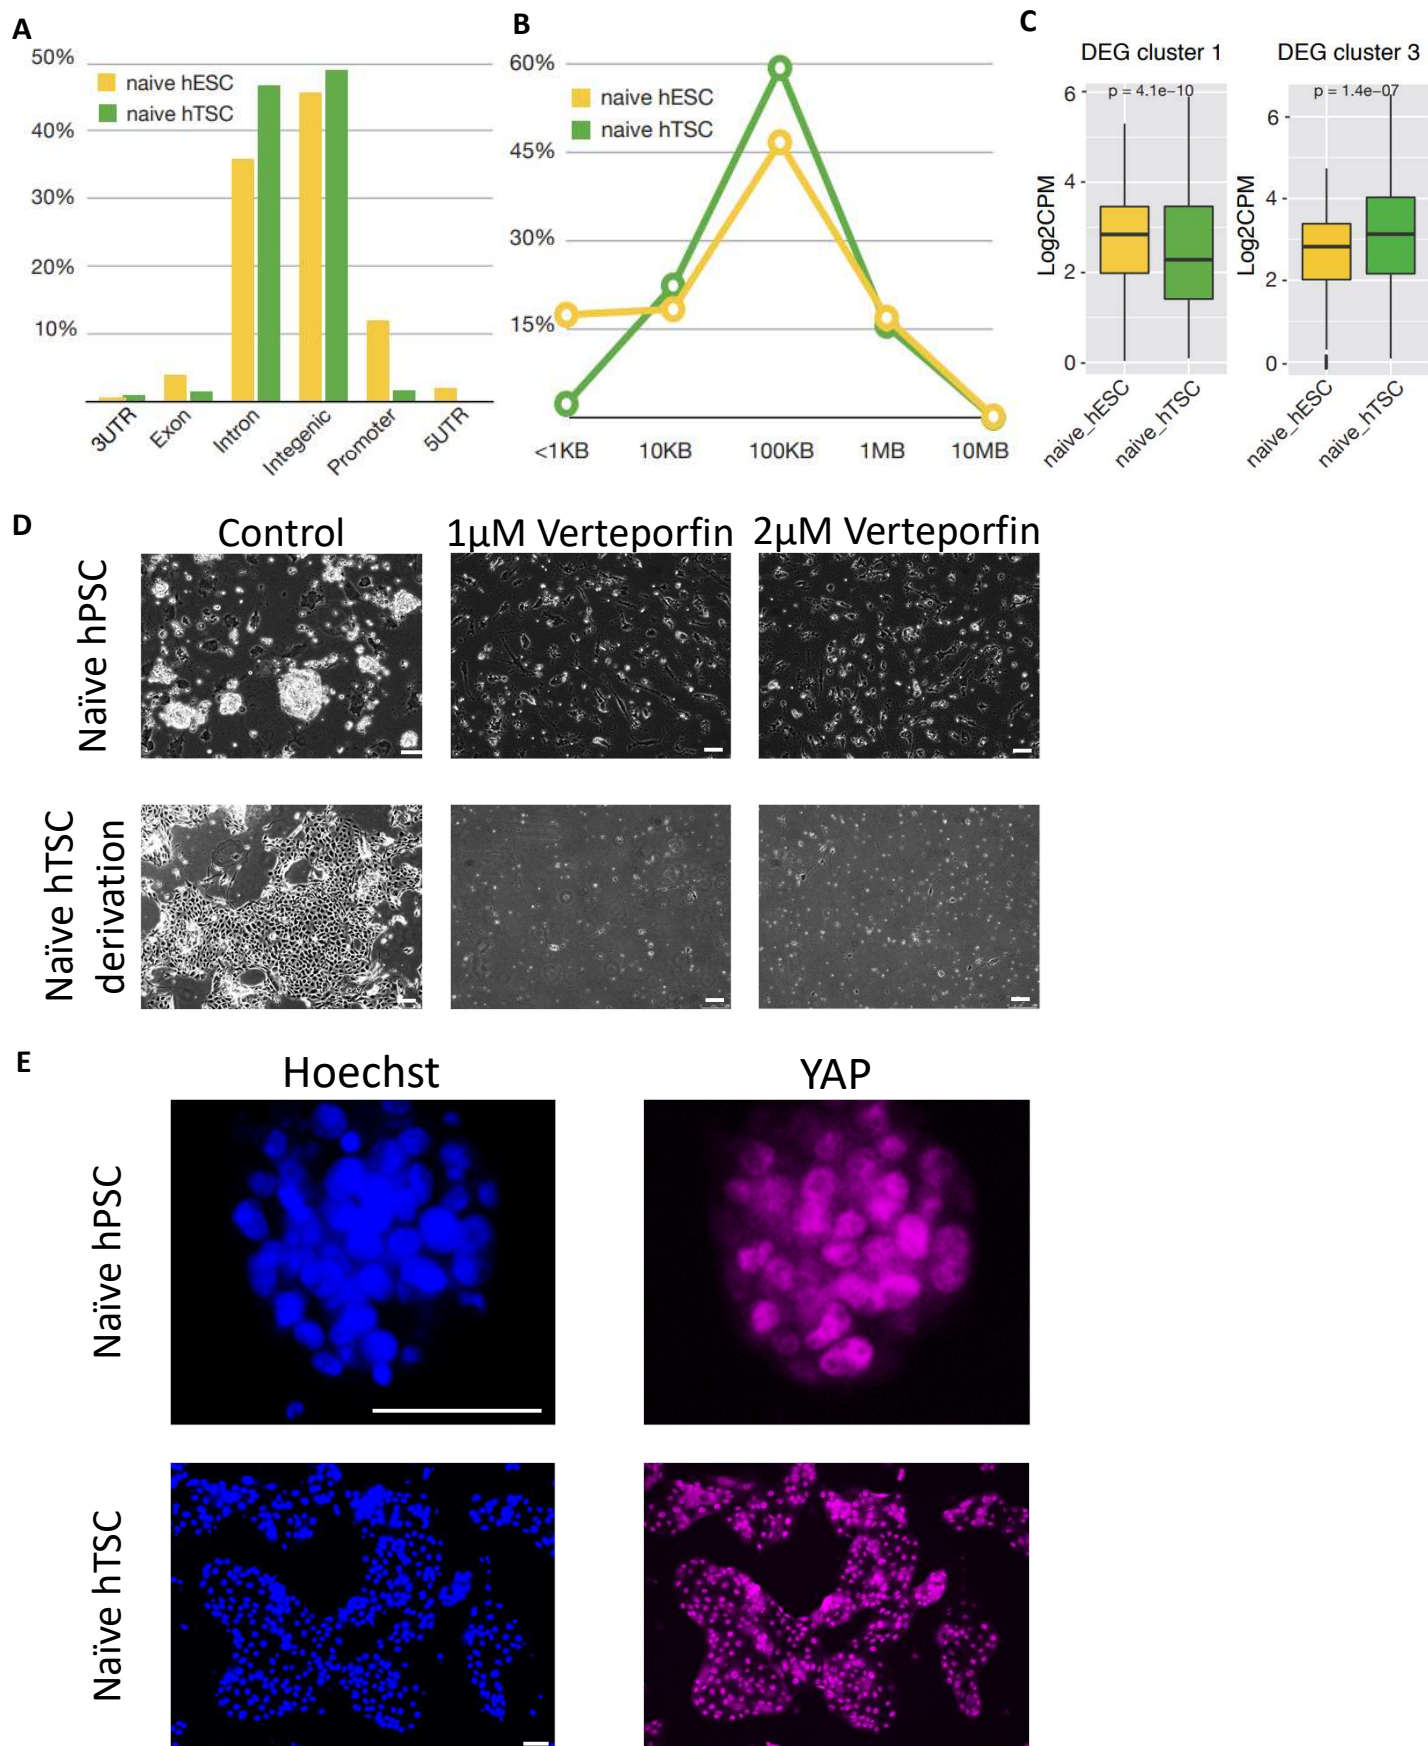

**Figure 4-S2**

Supplement: supp [file elife-52504-supp-v1.zip]

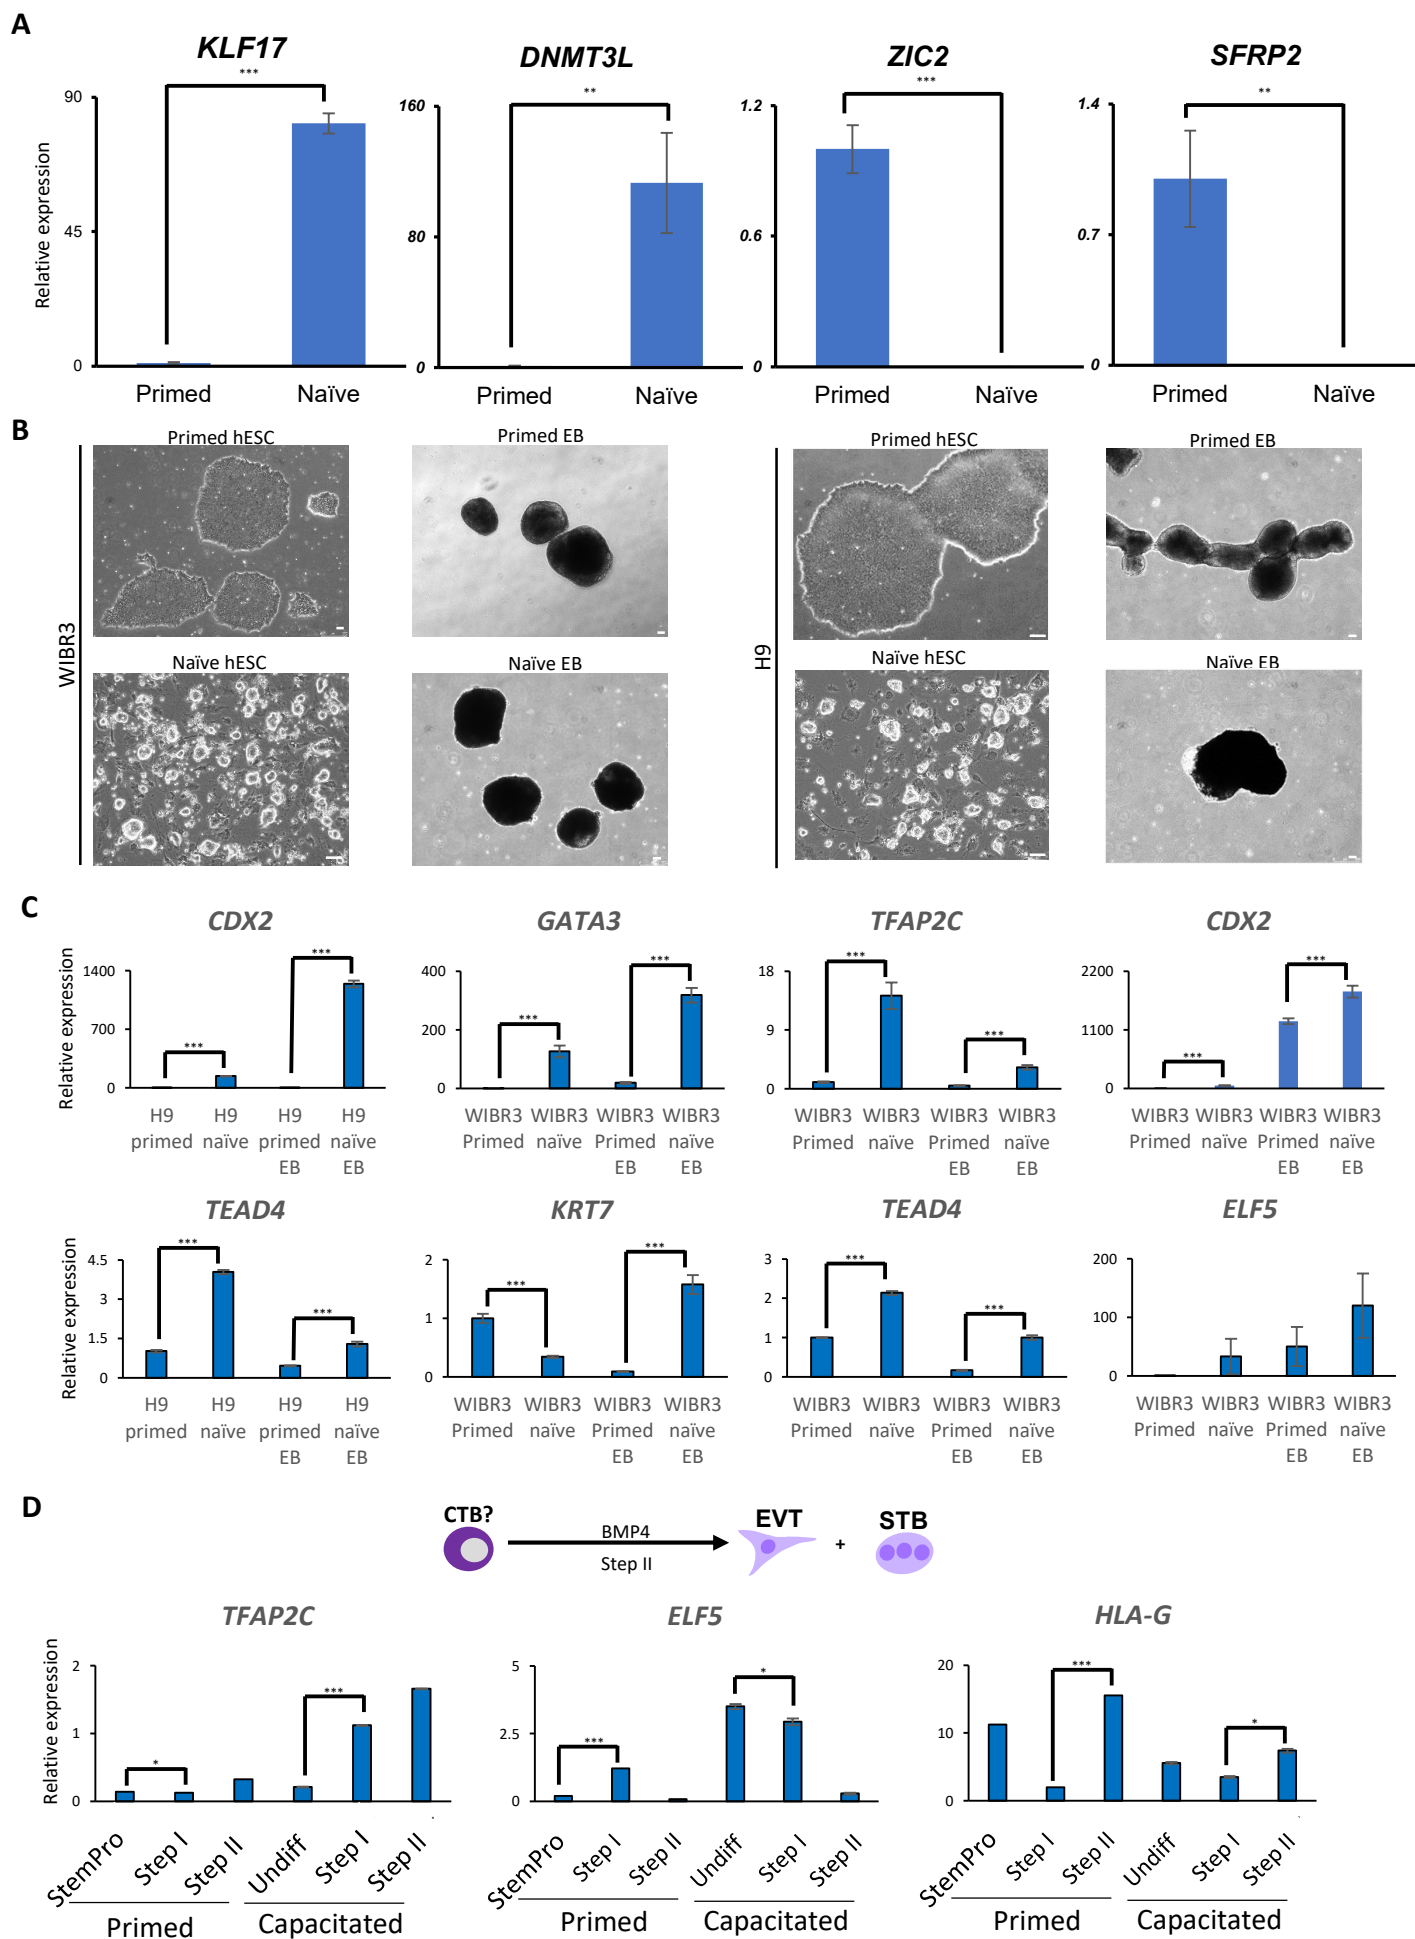

Supplement: supp [file elife-52504-supp-v1.zip › elife_poa_e52504_Figure_1_figure_supplement_1.pdf]
